# Supplementary material for: A systematic bi-genomic split-GFP assay illuminates the mitochondrial matrix proteome and protein targeting routes
Source: eLife journal article supplement (doi:10.7554/elife.98889), 2024-07-26
Supplement: fig2-data1 [file Brecker_2013.xlsx]

## Sheet: Sheet1
ORF	Gene	Control Median	Control STD	Control Localization	Repeat 1 Median	Repeat 1 STD	Repeat 1 Localization	Repeat 2 Median	Repeat 2 STD	Repeat 2 Localization	DTT Median	DTT STD	DTT FoldChange	DTT Localization	H2O2 Median	H2O2 STD	H2O2 FoldChange	H2O2 Localization	Starvation Median	Starvation STD	Starvation FoldChange	Starvation Localization	Description
YOR367W	SCP1	13.5	3.77774	below threshold	11.3804	2.79231	below threshold	15.6265	3.42294	below threshold	15.96	5.95	1.18	cytosol	17.55	3.6	1.3	cytosol	17.07	5.82	1.26	cytosol	Component of yeast cortical actin cytoskeleton, binds and cross links actin filaments; originally identified by its homology to calponin (contains a calponin-like repeat) but the Scp1p domain structure is more similar to transgelin
YOR090C	PTC5	13.23	3.86543	below threshold	11.5495	2.56695	below threshold	14.931	3.81795	below threshold	19.4	8.27	1.46	cytosol	12.6	4.19	0.95	cytosol	18.79	7.18	1.41	cytosol	Mitochondrial type 2C protein phosphatase involved in regulation of pyruvate dehydrogenase activity by dephosphorylating the ser-133 residue of the Pda1p subunit; acts in concert with kinases Pkp1p and Pkp2p and phosphatase Ptc6p
YKR082W	NUP133	11.87	3.84269	below threshold	11.7407	3.05287	below threshold	12.0151	4.25031	below threshold	16.38	5.09	1.37	cytosol	16.12	2.84	1.35	cytosol	NA	NA	NA	cytosol	Subunit of the Nup84p subcomplex of the nuclear pore complex (NPC), localizes to both sides of the NPC, required to establish a normal nucleocytoplasmic concentration gradient of the GTPase Gsp1p
YLR368W	MDM30	13.29	3.54458	below threshold	12.0776	3.59287	below threshold	14.5179	3.01176	below threshold	16.98	6.33	1.27	cytosol	13.7	2.93	1.03	cytosol	19.69	3.83	1.48	cytosol	F-box protein; associates with mitochondria and has a role in mitochondrial fusion; stimulates nuclear export of specific mRNAs; promotes ubiquitin-mediated degradation of Gal4p in some strains
YPR096C	YPR096C	13.24	3.81853	below threshold	12.1602	3.89805	below threshold	14.3395	3.45512	below threshold	16.88	5.96	1.27	cytosol	15.03	3.37	1.13	cytosol	15.94	7.26	1.2	cytosol	Protein of unknown function that may interact with ribosomes, based on co-purification experiments
YGL211W	NCS6	14.1	3.31742	below threshold	12.1692	2.60604	below threshold	16.0408	3.06388	below threshold	13.63	5.69	0.96	cytosol	15.92	3.53	1.12	cytosol	23.18	11.63	1.64	cytosol	Protein required for thiolation of the uridine at the wobble position of Gln, Lys, and Glu tRNAs; has a role in urmylation and in invasive and pseudohyphal growth; inhibits replication of Brome mosaic virus in S. cerevisiae
YNR032C-A	HUB1	12.76	3.41338	below threshold	12.2045	3.10217	below threshold	13.3341	3.63403	below threshold	16.2	5.8	1.26	cytosol	14.43	3.28	1.13	cytosol	17.3	6.12	1.35	cytosol	Ubiquitin-like protein modifier, may function in modification of Sph1p and Hbt1p, functionally complemented by the human or S. pombe ortholog; mechanism of Hub1p adduct formation not yet clear
YAL064W	YAL064W	12.61	3.72346	below threshold	12.2056	3.81277	below threshold	13.0249	3.62927	below threshold	15.93	5.94	1.26	cytosol	15.18	3.24	1.2	cytosol	18.01	9.82	1.42	cytosol	Protein of unknown function; may interact with ribosomes, based on co-purification experiments
YFR037C	RSC8	13.27	3.89447	below threshold	12.2895	3.94287	below threshold	14.2609	3.60582	below threshold	17.75	6.35	1.33	cytosol	13.05	3.33	0.98	cytosol	14.76	3.07	1.11	cytosol	Component of the RSC chromatin remodeling complex; essential for viability and mitotic growth; homolog of SWI/SNF subunit Swi3p, but unlike Swi3p, does not activate transcription of reporters
YLR156W	YLR156W	13.38	4.04752	below threshold	12.335	3.97981	below threshold	14.4337	3.92142	below threshold	17.22	5.68	1.28	cytosol	16.49	4.03	1.23	cytosol	17.86	10.52	1.33	cytosol	Putative protein of unknown function; exhibits a two-hybrid interaction with Jsn1p in a large-scale analysis
YAL045C	YAL045C	12.6	3.91826	below threshold	12.3477	3.4891	below threshold	12.8653	4.17763	below threshold	15.76	5.93	1.25	cytosol	15.96	3.42	1.26	cytosol	16.9	8.58	1.34	cytosol	Dubious open reading frame unlikely to encode a protein, based on available experimental and comparative sequence data; almost completely overlaps YAL044W-A
YJL189W	RPL39	14.45	3.64564	below threshold	12.375	3.59963	below threshold	16.5397	2.13207	below threshold	15.32	5.87	1.05	cytosol	18.62	3.34	1.28	cytosol	15.33	6.21	1.06	cytosol	Protein component of the large (60S) ribosomal subunit, has similarity to rat L39 ribosomal protein; required for ribosome biogenesis; loss of both Rpl31p and Rpl39p confers lethality; also exhibits genetic interactions with SIS1 and PAB1
YAR030C	YAR030C	13.1	4.09927	below threshold	12.4109	4.29583	below threshold	13.8098	3.78161	below threshold	15.5	6.52	1.18	cytosol	16.05	3.09	1.22	cytosol	15.99	8.22	1.21	cytosol	Dubious open reading frame unlikely to encode a protein, based on available experimental and comparative sequence data; partially overlaps the uncharacterized ORF YAR029W and the verified gene PRM9
YOR242C	SSP2	13.11	3.89581	below threshold	12.428	3.84519	below threshold	13.817	3.8434	below threshold	15.75	4.99	1.2	cytosol	18.26	3.84	1.39	cytosol	27.35	5.7	2.08	cytosol	Sporulation specific protein that localizes to the spore wall; required for sporulation at a point after meiosis II and during spore wall formation; SSP2 expression is induced midway in meiosis
YMR052C-A	YMR052C-A	13.14	3.85372	below threshold	12.4713	3.88408	below threshold	13.8148	3.7624	below threshold	15.77	5.61	1.2	cytosol	15.56	3.84	1.18	cytosol	16.72	9.81	1.27	cytosol	Dubious open reading frame unlikely to encode a functional protein, based on available experimental and comparative sequence data
YDR199W	YDR199W	13.5	3.59389	below threshold	12.4904	3.50023	below threshold	14.5133	3.46612	below threshold	16.83	6.61	1.24	cytosol	15.68	3.65	1.16	cytosol	17.28	10.86	1.28	cytosol	Dubious open reading frame unlikely to encode a protein, based on available experimental and comparative sequence data; partially overlaps the verified gene VPS64; computationally predicted to have thiol-disulfide oxidoreductase activity
YOL166C	YOL166C	12.73	3.60054	below threshold	12.5443	3.39615	below threshold	12.9337	3.77495	below threshold	16.5	5.4	1.29	cytosol	14.52	3.54	1.13	cytosol	17.99	6.62	1.41	cytosol	Dubious open reading frame unlikely to encode a functional protein, based on available experimental and comparative sequence data
YDL106C	PHO2	12.95	3.48523	below threshold	12.5566	3.32884	below threshold	13.35	3.58615	below threshold	16.47	6.56	1.27	cytosol	12.33	3.05	0.95	cytosol	18.88	6.13	1.45	cytosol	Homeobox transcription factor; regulatory targets include genes involved in phosphate metabolism; binds cooperatively with Pho4p to the PHO5 promoter; phosphorylation of Pho2p facilitates interaction with Pho4p
YPR037C	ERV2	14.8	3.46891	below threshold	12.5615	3.21186	below threshold	17.0518	2.78689	below threshold	16.43	5.68	1.1	cytosol	18.14	3.63	1.22	cytosol	15.53	5.84	1.04	cytosol	Flavin-linked sulfhydryl oxidase localized to the endoplasmic reticulum lumen, involved in disulfide bond formation within the ER
YOL157C	YOL157C	13.43	3.57338	below threshold	12.5965	3.31623	below threshold	14.2858	3.65713	below threshold	16.39	5.79	1.21	cytosol	13.54	3.27	1	cytosol	16.52	6.67	1.22	cytosol	Putative protein of unknown function
YDR339C	FCF1	14.92	4.11381	below threshold	12.6339	3.58955	below threshold	17.2202	3.60509	below threshold	15.82	6.17	1.05	cytosol	18.62	4.64	1.24	cytosol	19.56	4.87	1.31	cytosol	Putative PINc domain nuclease required for early cleavages of 35S pre-rRNA and maturation of 18S rRNA; component of the SSU (small subunit) processome involved in 40S ribosomal subunit biogenesis; copurifies with Faf1p
YBL065W	YBL065W	13.73	3.42407	below threshold	12.691	3.48917	below threshold	14.7833	3.07081	below threshold	17.33	6.04	1.26	cytosol	15.51	3.5	1.12	cytosol	16.29	8.33	1.18	cytosol	Dubious open reading frame unlikely to encode a protein, based on available experimental and comparative sequence data; partially overlaps verified ORF SEF1/YBL066C; YBL065W is a non-essential gene
YNR019W	ARE2	13.59	4.20956	below threshold	12.6923	4.44575	below threshold	14.491	3.64294	below threshold	14.12	4.51	1.03	cytosol	16.13	2.62	1.18	cytosol	17.68	3.59	1.3	cytosol	Acyl-CoA:sterol acyltransferase, isozyme of Are1p; endoplasmic reticulum enzyme that contributes the major sterol esterification activity in the presence of oxygen
YLR302C	YLR302C	14.08	4.31792	below threshold	12.6928	4.4417	below threshold	15.4775	3.68913	below threshold	18.13	6.69	1.28	cytosol	14.86	2.99	1.05	cytosol	15.44	5.18	1.09	cytosol	Dubious open reading frame unlikely to encode a functional protein, based on available experimental and comparative sequence data
YDR048C	YDR048C	13.13	4.16885	below threshold	12.7534	4.52362	below threshold	13.5176	3.479	below threshold	16.12	4.4	1.22	cytosol	15.5	3.45	1.18	cytosol	19.58	8.16	1.49	cytosol	Dubious ORF unlikely to encode a functional protein, based on available experimental and comparative sequence data
YLR236C	YLR236C	13.33	3.65145	below threshold	12.7579	3.32818	below threshold	13.9101	3.8952	below threshold	18.33	5.57	1.37	cytosol	16.61	3.8	1.24	cytosol	20.87	11.96	1.56	cytosol	Dubious open reading frame unlikely to encode a functional protein, based on available experimental and comparative sequence data
YPR194C	OPT2	13.49	3.79318	below threshold	12.7795	3.63187	below threshold	14.2108	3.83835	below threshold	14.62	4.46	1.08	cytosol	15.32	3.68	1.13	cytosol	17.04	3.96	1.26	cytosol	Oligopeptide transporter; member of the OPT family, with potential orthologs in S. pombe and C. albicans; also plays a role in formation of mature vacuoles
YPL047W	SGF11	13.23	3.22631	below threshold	12.7853	3.35345	below threshold	13.6826	3.02483	below threshold	16.16	5.68	1.22	cytosol	13.54	2.67	1.02	cytosol	13.54	2.03	1.02	cytosol	Integral subunit of SAGA histone acetyltransferase complex, regulates transcription of a subset of SAGA-regulated genes, required for the Ubp8p association with SAGA and for H2B deubiquitylation
YDR253C	MET32	14.6	4.02112	below threshold	12.8057	3.63054	below threshold	16.4147	4.09782	below threshold	15.1	5.93	1.03	cytosol	17.29	4.05	1.18	cytosol	22.67	12.51	1.55	cytosol	Zinc-finger DNA-binding protein, involved in transcriptional regulation of the methionine biosynthetic genes, similar to Met31p
YBL072C	RPS8A	15.55	4.31711	below threshold	12.8113	3.53275	below threshold	18.3087	3.69144	below threshold	15.9	5.87	1.02	cytosol	17.61	3.68	1.13	cytosol	18.32	5.02	1.17	cytosol	Protein component of the small (40S) ribosomal subunit; identical to Rps8Bp and has similarity to rat S8 ribosomal protein
YPL099C	AIM43	15.02	3.47312	below threshold	12.8517	2.18865	below threshold	17.1973	3.07759	below threshold	16.59	6.98	1.1	cytosol	18.92	3.81	1.25	cytosol	16.09	5.52	1.07	cytosol	Protein of unknown function; the authentic, non-tagged protein is detected in purified mitochondria in high-throughput studies; null mutant displays elevated frequency of mitochondrial genome loss
YCR006C	YCR006C	15.24	3.77608	below threshold	12.8668	2.82664	below threshold	17.6234	3.45457	below threshold	14.32	5.58	0.93	cytosol	15.74	2.98	1.03	cytosol	19.79	2.74	1.29	cytosol	Dubious open reading frame unlikely to encode a protein, based on available experimental and comparative sequence data
YLR031W	YLR031W	14.27	3.58413	below threshold	12.8936	3.48112	below threshold	15.6606	3.25954	below threshold	15.31	5.07	1.07	cytosol	16.2	4.08	1.13	cytosol	23.37	5.73	1.63	cytosol	Putative protein of unknown function
YGR064W	YGR064W	13.63	3.78246	below threshold	12.9396	4.00813	below threshold	14.3393	3.53961	below threshold	17.58	5.48	1.28	cytosol	17.24	3.26	1.26	cytosol	15.96	4.76	1.17	cytosol	Dubious open reading frame unlikely to encode a protein, based on available experimental and comparative sequence data; partially overlaps the verified ORF SPT4/YGR063C
YNL017C	YNL017C	14.04	3.54731	below threshold	12.9775	3.54509	below threshold	15.1213	3.26658	below threshold	16.69	5.94	1.18	cytosol	15.58	3.64	1.1	cytosol	18.91	4.15	1.34	cytosol	Dubious open reading frame unlikely to encode a protein, based on available experimental and comparative sequence data; completely overlaps the tRNA ORF tI(AAU)N2
YMR257C	PET111	13.93	4.25671	below threshold	13.0007	4.25338	below threshold	14.8638	4.06081	below threshold	14.41	4.41	1.03	cytosol	15.1	3.19	1.08	cytosol	17.06	4.92	1.22	cytosol	Mitochondrial translational activator specific for the COX2 mRNA; located in the mitochondrial inner membrane
YGR035C	YGR035C	14.03	3.62918	below threshold	13.005	3.74996	below threshold	15.0659	3.28557	below threshold	16.12	6.63	1.14	cytosol	17.23	3.61	1.22	cytosol	17.04	8.47	1.21	cytosol	Putative protein of unknown function, potential Cdc28p substrate; transcription is activated by paralogous transcription factors Yrm1p and Yrr1p along with genes involved in multidrug resistance
YIL163C	YIL163C	13.01	3.57032	below threshold	13.0152	3.49527	below threshold	13.0211	3.66984	below threshold	17.98	5.31	1.38	cytosol	15.81	3.99	1.21	cytosol	16.71	7.04	1.28	cytosol	Dubious open reading frame unlikely to encode a functional protein, based on available experimental and comparative sequence data
YMR082C	YMR082C	14.43	3.74824	below threshold	13.0351	3.23108	below threshold	15.8408	3.82016	below threshold	16.46	6.18	1.14	cytosol	16.51	3.55	1.14	cytosol	18.48	3.74	1.28	cytosol	Dubious open reading frame unlikely to encode a functional protein, based on available experimental and comparative sequence data
YDL159W-A	YDL159W-A	13.47	4.38653	below threshold	13.0436	4.06779	below threshold	13.9021	4.53498	below threshold	15.77	4.54	1.17	cytosol	16.36	3.6	1.21	cytosol	14.83	6.67	1.1	cytosol	Putative protein of unknown function; identified by sequence comparison with hemiascomycetous yeast species
YGR039W	YGR039W	13.6	3.73732	below threshold	13.1178	3.79237	below threshold	14.0927	3.64	below threshold	18.5	5.58	1.36	cytosol	16.98	3.06	1.24	cytosol	17.05	6.75	1.25	cytosol	Dubious open reading frame unlikely to encode a protein, based on available experimental and comparative sequence data; partially overlaps the Autonomously Replicating Sequence ARS722
YGL217C	YGL217C	13.55	3.85873	below threshold	13.1251	3.72736	below threshold	13.9874	3.96311	below threshold	17.05	5.86	1.25	cytosol	14.74	3.24	1.08	cytosol	18.43	9.01	1.35	cytosol	Dubious open reading frame unlikely to encode a protein, based on available experimental and comparative sequence data; partially overlaps the verified ORF KIP3/YGL216W
YOR277C	YOR277C	13.31	3.44044	below threshold	13.1984	3.41567	below threshold	13.4411	3.45961	below threshold	15.92	5.6	1.19	cytosol	14.82	2.69	1.11	cytosol	15.01	2.95	1.12	cytosol	Dubious open reading frame unlikely to encode a protein, based on available experimental and comparative sequence data; almost completely overlaps the verified gene CAF20
YAL069W	YAL069W	13.33	3.91008	below threshold	13.2044	4.22391	below threshold	13.4616	3.69042	below threshold	16.13	5.05	1.21	cytosol	13.03	3.66	0.97	cytosol	17.19	5.32	1.28	cytosol	Dubious open reading frame unlikely to encode a protein, based on available experimental and comparative sequence data
YKL051W	SFK1	13.22	4.01508	below threshold	13.2068	4.37714	below threshold	13.2419	3.18898	below threshold	13.74	4.27	1.03	cytosol	14.71	2.29	1.11	cytosol	14.26	3.15	1.07	cytosol	Plasma membrane protein that may act together with or upstream of Stt4p to generate normal levels of the essential phospholipid PI4P, at least partially mediates proper localization of Stt4p to the plasma membrane
YGL100W	SEH1	12.61	3.93255	below threshold	13.2244	4.22947	below threshold	12.0114	2.95221	below threshold	14.32	6.74	1.13	cytosol	13.97	2.65	1.1	cytosol	18.9	4.28	1.49	cytosol	Nuclear pore protein that is part of the evolutionarily conserved Nup84p complex (Nup84p, Nup85p, Nup120p, Nup145p, and Seh1p); homologous to Sec13p
YLR217W	YLR217W	13.88	3.65758	below threshold	13.2259	3.71002	below threshold	14.5482	3.51895	below threshold	14.53	4.55	1.04	cytosol	15.52	3.75	1.11	cytosol	18.44	9.59	1.32	cytosol	Dubious open reading frame unlikely to encode a protein, based on available experimental and comparative sequence data; partially overlaps the verified gene CPR6
YPL044C	YPL044C	15.53	4.0839	below threshold	13.2261	3.27936	below threshold	17.8441	3.62189	below threshold	16.13	5.59	1.03	cytosol	16.43	3.44	1.05	cytosol	20.16	2.97	1.29	cytosol	Dubious open reading frame unlikely to encode a protein, based on available experimental and comparative sequence data; partially overlaps the verified gene NOP4/YPL043W
YDR455C	YDR455C	13.16	3.50272	below threshold	13.2328	3.47443	below threshold	13.1023	3.53029	below threshold	15.6	5.31	1.18	cytosol	14.94	3.32	1.13	cytosol	18.62	3.16	1.41	cytosol	Dubious open reading frame unlikely to encode a protein, based on available experimental and comparative sequence data; partially overlaps the verified gene YDR456W
YLR149C-A	YLR149C-A	13.08	3.26886	below threshold	13.2381	3.33337	below threshold	12.9325	3.2211	below threshold	16.5	6.42	1.26	cytosol	14.67	3.18	1.12	cytosol	16.58	10.06	1.26	cytosol	Dubious open reading frame unlikely to encode a protein, based on available experimental and comparative sequence data
YOL085C	YOL085C	14.4	3.97036	below threshold	13.2542	3.97414	below threshold	15.5556	3.74951	below threshold	16.47	5.15	1.14	cytosol	16.06	3.51	1.11	cytosol	17.81	9.32	1.23	cytosol	Dubious open reading frame unlikely to encode a protein, based on experimental and comparative sequence data; partially overlaps the dubious gene YOL085W-A
YCR022C	YCR022C	13.08	3.5282	below threshold	13.255	3.57855	below threshold	12.9163	3.48627	below threshold	17.05	6.52	1.3	cytosol	15.16	3.26	1.15	cytosol	16.36	6.4	1.25	cytosol	Dubious open reading frame unlikely to encode a protein, based on available experimental and comparative sequence data; YCR022C is not an essential gene
YDR491C	YDR491C	12.33	3.76123	below threshold	13.2692	3.82583	below threshold	11.4085	3.40021	below threshold	14.41	4.4	1.16	cytosol	13.38	3.78	1.08	cytosol	17.62	5.09	1.42	cytosol	Dubious open reading frame unlikely to encode a functional protein, based on available experimental and comparative sequence data
YFR029W	PTR3	13.55	4.34493	below threshold	13.272	4.68669	below threshold	13.8584	3.70581	below threshold	14.2	5.63	1.04	cytosol	14.96	3.18	1.1	cytosol	17.72	6.55	1.3	cytosol	Component of the SPS plasma membrane amino acid sensor system (Ssy1p-Ptr3p-Ssy5p), which senses external amino acid concentration and transmits intracellular signals that result in regulation of expression of amino acid permease genes
YIL111W	COX5B	12.66	3.7842	below threshold	13.2832	3.8514	below threshold	12.0571	3.58958	below threshold	15.01	4.66	1.18	cytosol	14.13	4.05	1.11	cytosol	17.14	6.31	1.35	cytosol	Subunit Vb of cytochrome c oxidase, which is the terminal member of the mitochondrial inner membrane electron transport chain; predominantly expressed during anaerobic growth while its isoform Va (Cox5Ap) is expressed during aerobic growth
YLR160C	ASP3-4	13.29	3.46397	below threshold	13.2855	3.47132	below threshold	13.3048	3.46121	below threshold	17.05	5.1	1.28	cytosol	17.08	3.45	1.28	cytosol	23.49	5.17	1.76	cytosol	Cell-wall L-asparaginase II, involved in asparagine catabolism; expression is induced during nitrogen starvation; four copies of ASP3 are present in the genome reference strain S288C
YML066C	SMA2	13.78	4.25736	below threshold	13.3125	4.01027	below threshold	14.2596	4.33618	below threshold	15.66	4.77	1.13	cytosol	18.21	3.44	1.32	cytosol	21.75	4.79	1.57	cytosol	Meiosis-specific prospore membrane protein; required to produce bending force necessary for proper assembly of the prospore membrane during sporulation
YIR020C	YIR020C	14.52	4.37166	below threshold	13.318	4.53825	below threshold	15.746	3.95583	below threshold	16.75	5.67	1.15	cytosol	16.36	2.82	1.12	cytosol	15.74	4.17	1.08	cytosol	Dubious open reading frame unlikely to encode a functional protein, based on available experimental and comparative sequence data
YLR282C	YLR282C	14.57	3.74917	below threshold	13.3291	3.66122	below threshold	15.8266	3.40605	below threshold	17.22	5.39	1.18	cytosol	15.75	3.42	1.08	cytosol	16.39	3.57	1.12	cytosol	Dubious open reading frame unlikely to encode a functional protein, based on available experimental and comparative sequence data; deletion mutation confers an increase in Ty1 transposition
YDR133C	YDR133C	14.32	3.57181	below threshold	13.3429	3.69516	below threshold	15.308	3.31914	below threshold	17.05	5.79	1.19	cytosol	17.31	3.16	1.2	cytosol	18.76	4.52	1.31	cytosol	Dubious open reading frame unlikely to encode a protein, based on available experimental and comparative sequence data; partially overlaps YDR134C
YDL194W	SNF3	13.69	3.92228	below threshold	13.3485	3.96107	below threshold	14.0585	3.82854	below threshold	14.5	5.02	1.05	cytosol	16.07	2.51	1.17	cytosol	16.54	7.47	1.2	cytosol	Plasma membrane low glucose sensor that regulates glucose transport; contains 12 predicted transmembrane segments and a long C-terminal tail required for induction of hexose transporters; also senses fructose and mannose; similar to Rgt2p
YLR251W	SYM1	14.98	3.41288	below threshold	13.3608	3.03021	below threshold	16.6187	3.0238	below threshold	15.44	5.66	1.03	cytosol	16.5	3.38	1.1	cytosol	17.95	3.29	1.19	cytosol	Protein required for ethanol metabolism; induced by heat shock and localized to the inner mitochondrial membrane; homologous to mammalian peroxisomal membrane protein Mpv17
YHL018W	YHL018W	13.35	4.02464	below threshold	13.3759	3.79316	below threshold	13.3395	4.19015	below threshold	18.19	6.5	1.36	cytosol	17.37	3.8	1.3	cytosol	15.97	7.87	1.19	cytosol	Putative protein of unknown function; green fluorescent protein (GFP)-fusion protein localizes to mitochondria and is induced in response to the DNA-damaging agent MMS
YLR461W	PAU4	14.13	3.69128	below threshold	13.384	3.95841	below threshold	14.8965	3.36853	below threshold	17.23	5.66	1.21	cytosol	16.97	3.67	1.2	cytosol	17.28	9.59	1.22	cytosol	Member of the seripauperin multigene family encoded mainly in subtelomeric regions; active during alcoholic fermentation, regulated by anaerobiosis, negatively regulated by oxygen, repressed by heme
YLR261C	VPS63	13.89	3.71028	below threshold	13.407	3.43935	below threshold	14.3922	3.97745	below threshold	17.65	5.88	1.27	cytosol	16.22	3.08	1.16	cytosol	16.1	4.23	1.15	cytosol	Dubious open reading frame, unlikely to encode a protein; not conserved in closely related Saccharomyces species; 98% of ORF overlaps the verified gene YPT6; deletion causes a vacuolar protein sorting defect
YKR061W	KTR2	13.27	3.54899	below threshold	13.4266	3.82952	below threshold	13.1264	3.12601	below threshold	15	4.83	1.13	cytosol	14.13	2.76	1.06	cytosol	20.28	3.96	1.52	cytosol	Mannosyltransferase involved in N-linked protein glycosylation; member of the KRE2/MNT1 mannosyltransferase family
YER097W	YER097W	14.22	4.13337	below threshold	13.4273	3.98359	below threshold	15.0304	4.19432	below threshold	14.73	6.63	1.03	cytosol	15.8	3.91	1.11	cytosol	16.83	8.28	1.18	cytosol	Dubious open reading frame unlikely to encode a functional protein, based on available experimental and comparative sequence data
YLR465C	BSC3	14.14	3.92297	below threshold	13.4417	3.21774	below threshold	14.853	4.16855	below threshold	16.68	5.26	1.17	cytosol	16.78	3.7	1.18	cytosol	16.23	6.83	1.14	cytosol	Dubious open reading frame, unlikely to encode a protein; not conserved in closely related Saccharomyces species; 100% of YLR465C overlaps the uncharacterized ORF YLR464W and 86% of YLR465C overlaps the verified gene YRF1-4
YJL150W	YJL150W	13.72	4.26649	below threshold	13.4457	4.42986	below threshold	14.0192	4.08377	below threshold	16.71	5.1	1.21	cytosol	14.47	2.89	1.05	cytosol	15.19	6.27	1.1	cytosol	Dubious open reading frame unlikely to encode a functional protein, based on available experimental and comparative sequence data
YDR112W	IRC2	13.95	3.77873	below threshold	13.4479	3.65752	below threshold	14.4763	3.8787	below threshold	16.16	5.79	1.15	cytosol	17.11	3.64	1.22	cytosol	20.31	5.16	1.45	cytosol	Dubious open reading frame, unlikely to encode a protein, based on available experimental and comparative sequence data; partially overlaps YDR111C; null mutant displays increased levels of spontaneous Rad52p foci
YPL165C	SET6	14.23	3.66237	below threshold	13.4627	3.83348	below threshold	15.0055	3.20597	below threshold	18.39	5.91	1.29	cytosol	17.87	3.39	1.25	cytosol	23.1	5.5	1.62	cytosol	SET domain protein of unknown function; deletion heterozygote is sensitive to compounds that target ergosterol biosynthesis, may be involved in compound availability
YLR415C	YLR415C	14.53	4.01321	below threshold	13.4718	3.96975	below threshold	15.5982	3.8293	below threshold	16.59	5.68	1.14	cytosol	15.47	3.38	1.06	cytosol	15.55	3.82	1.07	cytosol	Putative protein of unknown function; YLR415C is not an essential gene
YLR162W	YLR162W	14.09	3.41902	below threshold	13.476	3.56202	below threshold	14.7168	3.16183	below threshold	17.57	5.77	1.24	cytosol	16.88	3.49	1.19	cytosol	15.62	5.54	1.1	cytosol	Putative protein of unknown function; overexpression confers resistance to the antimicrobial peptide MiAMP1
YDL023C	YDL023C	14.64	3.62299	below threshold	13.4841	3.37353	below threshold	15.8031	3.63527	below threshold	15.01	4.51	1.02	cytosol	13.22	3.67	0.9	cytosol	17.7	9.24	1.2	cytosol	Dubious open reading frame, unlikely to encode a protein; not conserved in other Saccharomyces species; overlaps the verified gene GPD1; deletion confers sensitivity to GSAO; deletion in cyr1 mutant results in loss of stress resistance
YPR081C	GRS2	13.57	3.74221	below threshold	13.4857	3.8154	below threshold	13.6631	3.6743	below threshold	18.96	7.22	1.39	cytosol	17.3	3.69	1.27	cytosol	18.79	4.65	1.38	cytosol	Protein with sequence similarity to Grs1p, which is a glycyl-tRNA synthetase; cannot substitute for Grs1p; possible pseudogene that is expressed at very low levels
YCR011C	ADP1	14.17	4.23564	below threshold	13.4903	4.23236	below threshold	14.8585	4.15585	below threshold	16.47	5.97	1.16	cytosol	17.1	3.14	1.2	cytosol	19.92	5.54	1.4	cytosol	Putative ATP-dependent permease of the ABC transporter family of proteins
YBL048W	RRT1	13.79	3.91404	below threshold	13.5023	3.76968	below threshold	14.0804	4.01925	below threshold	19.56	6.31	1.41	cytosol	16.51	3.71	1.19	cytosol	17.13	5.87	1.24	cytosol	Identified in a screen for mutants with increased levels of rDNA transcription; dubious open reading frame unlikely to encode a protein, based on experimental and comparative sequence data
YKR050W	TRK2	14.9	4.4379	below threshold	13.5035	4.31254	below threshold	16.3191	4.18174	below threshold	13.97	4.98	0.93	cytosol	16.14	2.66	1.08	cytosol	17.83	4.84	1.19	cytosol	Component of the Trk1p-Trk2p potassium transport system
YKR032W	YKR032W	13.71	3.66524	below threshold	13.5086	3.8262	below threshold	13.9227	3.54425	below threshold	15.68	5.31	1.14	cytosol	15.03	3.18	1.09	cytosol	18.16	8.66	1.32	cytosol	Dubious open reading frame unlikely to encode a protein, based on available experimental and comparative sequence data
YPL278C	YPL278C	13.79	3.52683	below threshold	13.5158	3.79926	below threshold	14.08	3.23577	below threshold	15.84	5.04	1.14	cytosol	14.98	3.2	1.08	cytosol	15.33	6.61	1.11	cytosol	Putative protein of unknown function; gene expression regulated by copper levels
YLR269C	YLR269C	14.14	3.72017	below threshold	13.5167	3.53288	below threshold	14.7825	3.77441	below threshold	16.96	6.07	1.19	cytosol	16.46	3.51	1.16	cytosol	16.45	9.4	1.16	cytosol	Dubious open reading frame unlikely to encode a functional protein, based on available experimental and comparative sequence data
YIL102C	YIL102C	13.03	4.39767	below threshold	13.5387	4.18437	below threshold	12.5303	4.45668	below threshold	16.45	5.97	1.26	cytosol	16.12	3.8	1.23	cytosol	17.08	6.33	1.31	cytosol	Putative protein of unknown function
YPR099C	YPR099C	13.11	3.65978	below threshold	13.5403	3.55651	below threshold	12.6929	3.69535	below threshold	17.53	7.46	1.33	cytosol	16.99	3.37	1.29	cytosol	18.25	3.78	1.39	cytosol	Dubious open reading frame unlikely to encode a protein, based on available experimental and comparative sequence data; partially overlaps the verified gene MRPL51/YPR100W
YML103C	NUP188	14.42	3.72939	below threshold	13.5493	3.35131	below threshold	15.3062	3.85438	below threshold	17.98	5.33	1.24	cytosol	15.73	3.39	1.09	cytosol	16.99	6.97	1.17	cytosol	Subunit of the nuclear pore complex (NPC), involved in the structural organization of the complex and of the nuclear envelope, also involved in nuclear envelope permeability, interacts with Pom152p and Nic96p
YLR396C	VPS33	14.78	4.76154	below threshold	13.56	4.88897	below threshold	16.012	4.2377	below threshold	14.13	5.2	0.95	cytosol	15.28	3.25	1.03	cytosol	17.41	6.74	1.17	cytosol	ATP-binding protein that is a subunit of the HOPS complex and the CORVET tethering complex; essential for membrane docking and fusion at both the Golgi-to-endosome and endosome-to-vacuole stages of protein transport
YHR153C	SPO16	15.16	3.52231	below threshold	13.561	3.16103	below threshold	16.7675	3.27958	below threshold	15.46	5.56	1.01	cytosol	16.77	3.83	1.1	cytosol	20	3.69	1.31	cytosol	Meiosis-specific protein involved in synaptonemal complex assembly; implicated in regulation of crossover formation; required for sporulation
YLR089C	ALT1	14.33	3.31104	below threshold	13.5756	3.28915	below threshold	15.1006	3.19027	below threshold	16.16	5.27	1.12	cytosol	11.87	2.67	0.82	cytosol	23.54	19.54	1.64	cytosol	Alanine transaminase (glutamic pyruvic transaminase); involved in alanine biosynthetic and catabolic processes; the authentic, non-tagged protein is detected in highly purified mitochondria in high-throughput studies
YBR124W	YBR124W	14.91	4.4176	below threshold	13.5909	4.71663	below threshold	16.2397	3.13048	below threshold	16.68	6.74	1.11	cytosol	14.91	2.94	0.99	cytosol	14.98	6.15	1	cytosol	Putative protein of unknown function
YDL160C	DHH1	14.38	3.73806	below threshold	13.6324	3.83053	below threshold	15.1429	3.59234	below threshold	14.98	5.97	1.04	cytosol	16.11	3.27	1.12	cytosol	15.63	5.32	1.08	cytosol	Cytoplasmic DExD/H-box helicase, stimulates mRNA decapping, coordinates distinct steps in mRNA function and decay, interacts with both the decapping and deadenylase complexes, may have a role in mRNA export and translation
YOR381W	FRE3	14.08	4.10503	below threshold	13.6384	3.8493	below threshold	14.5472	4.27418	below threshold	15.53	5.18	1.1	cytosol	15.58	3	1.1	cytosol	16.75	6.19	1.18	cytosol	Ferric reductase, reduces siderophore-bound iron prior to uptake by transporters; expression induced by low iron levels
YBR262C	AIM5	14.45	4.07945	below threshold	13.6391	4.3442	below threshold	15.2889	3.61828	below threshold	17.22	7.32	1.19	cytosol	16.02	4.09	1.1	cytosol	18.24	8.85	1.26	cytosol	Protein of unknown function; the authentic, non-tagged protein is detected in purified mitochondria in high-throughput studies; null mutant displays elevated frequency of mitochondrial genome loss
YDR256C	CTA1	14.15	3.95197	below threshold	13.6435	4.35449	below threshold	14.6614	3.23216	below threshold	18.53	9.84	1.3	cytosol	17.52	3.48	1.23	cytosol	18.73	6.47	1.32	cytosol	Catalase A, breaks down hydrogen peroxide in the peroxisomal matrix formed by acyl-CoA oxidase (Pox1p) during fatty acid beta-oxidation
YLR365W	YLR365W	14.11	3.54312	below threshold	13.6478	3.43467	below threshold	14.5892	3.58777	below threshold	16.54	6.13	1.17	cytosol	14.85	3.35	1.05	cytosol	20.04	8.44	1.41	cytosol	Dubious open reading frame unlikely to encode a protein, based on available experimental and comparative sequence data; partially overlaps dubious gene YLR364C-A; YLR365W is not an essential gene
YOR366W	YOR366W	14.26	3.40585	below threshold	13.6611	3.34216	below threshold	14.8676	3.40086	below threshold	16.56	5.15	1.16	cytosol	16.38	3.16	1.14	cytosol	16.94	7.81	1.18	cytosol	Dubious open reading frame unlikely to encode a protein, based on available experimental and comparative sequence data; partially overlaps the uncharacterized ORF YOR365C
YDR102C	YDR102C	14.51	3.6794	below threshold	13.6624	3.91171	below threshold	15.3791	3.36549	below threshold	15.48	6.4	1.06	cytosol	16.87	3.51	1.16	cytosol	15.89	6.21	1.09	cytosol	Dubious open reading frame; homozygous diploid deletion strain exhibits high budding index
YLR018C	POM34	13.17	3.59147	below threshold	13.6667	3.56849	below threshold	12.6932	3.56503	below threshold	15.18	4.84	1.15	cytosol	13.62	2.92	1.03	cytosol	18.55	3.46	1.4	cytosol	Integral membrane protein of the nuclear pore; has an important role in maintaining the architecture of the pore complex
YJL023C	PET130	14.24	3.56321	below threshold	13.6739	3.31175	below threshold	14.8147	3.66628	below threshold	17.87	5.42	1.25	cytosol	18.29	3.23	1.28	cytosol	25.79	5.76	1.81	cytosol	Protein required for respiratory growth; the authentic, non-tagged protein is detected in highly purified mitochondria in high-throughput studies
YNL338W	YNL338W	13.54	3.72573	below threshold	13.6786	3.76829	below threshold	13.4171	3.69592	below threshold	18.05	5.9	1.33	cytosol	16.3	3.68	1.2	cytosol	15.26	6.11	1.12	cytosol	Dubious open reading frame unlikely to encode a protein, based on available experimental and comparative sequence data; completely overlaps TEL14L-XC, which is Telomeric X element Core sequence on the left arm of Chromosome XIV
YJR157W	YJR157W	15.33	4.11385	below threshold	13.6828	4.1626	below threshold	16.9928	3.42863	below threshold	17.2	7.02	1.12	cytosol	17.22	3.16	1.12	cytosol	14.99	4.92	0.97	cytosol	Dubious open reading frame unlikely to encode a functional protein, based on available experimental and comparative sequence data
YDR290W	YDR290W	14.3	4.19755	below threshold	13.6842	4.21101	below threshold	14.9402	4.11223	below threshold	16.86	6.06	1.17	cytosol	16.61	4.55	1.16	cytosol	16.7	6	1.16	cytosol	Dubious open reading frame unlikely to encode a protein, based on available experimental and comparative sequence data; partially overlaps the verified ORF RTT103
YNL095C	YNL095C	14.07	4.45577	below threshold	13.6905	4.47961	below threshold	14.4561	4.40288	below threshold	14.3	5.72	1.01	cytosol	15.49	3.47	1.1	cytosol	17.34	6.52	1.23	cytosol	Putative protein of unknown function predicted to contain a transmembrane domain; YNL095C is not an essential gene
YJL198W	PHO90	13.94	4.10482	below threshold	13.7037	4.34532	below threshold	14.1832	3.69036	below threshold	15.04	4.83	1.07	cytosol	14.43	2.87	1.03	cytosol	16.61	3.28	1.19	cytosol	Low-affinity phosphate transporter; deletion of pho84, pho87, pho89, pho90, and pho91 causes synthetic lethality; transcription independent of Pi and Pho4p activity; overexpression results in vigorous growth
YEL074W	YEL074W	14.4	3.66265	below threshold	13.7156	3.45204	below threshold	15.0964	3.95814	below threshold	16.8	5.41	1.16	cytosol	14.73	2.98	1.02	cytosol	17.49	9.1	1.21	cytosol	Hypothetical protein
YPR021C	AGC1	14.36	3.83381	below threshold	13.7361	3.52225	below threshold	14.9965	4.08989	below threshold	14.58	4.8	1.01	cytosol	15.3	3.48	1.06	cytosol	17.84	6.26	1.24	cytosol	Mitochondrial amino acid transporter, acts both as a glutamate uniporter and as an aspartate-glutamate exchanger; involved in nitrogen metabolism and nitrogen compound biosynthesis
YPR046W	MCM16	15.48	5.39571	below threshold	13.7385	5.25057	below threshold	17.2424	5.26043	below threshold	17.68	8.92	1.14	cytosol	18.73	4.82	1.2	cytosol	25.25	8.2	1.63	cytosol	Protein involved in kinetochore-microtubule mediated chromosome segregation; binds to centromere DNA
YIL086C	YIL086C	13.98	4.26907	below threshold	13.7416	3.90117	below threshold	14.2303	4.42966	below threshold	15.94	5.6	1.14	cytosol	15.62	3.19	1.11	cytosol	14.1	3.01	1	cytosol	Dubious open reading frame unlikely to encode a functional protein, based on available experimental and comparative sequence data
YIL013C	PDR11	14.66	3.72149	below threshold	13.7428	3.2812	below threshold	15.5998	3.80831	below threshold	16.74	5.88	1.14	cytosol	16.11	2.4	1.09	cytosol	16.43	2.03	1.12	cytosol	ATP-binding cassette (ABC) transporter, multidrug transporter involved in multiple drug resistance; mediates sterol uptake when sterol biosynthesis is compromisedregulated by Pdr1p; required for anaerobic growth
YPR014C	YPR014C	13.79	3.76008	below threshold	13.7494	3.95844	below threshold	13.8423	3.59404	below threshold	18.5	6.58	1.34	cytosol	15.96	3.26	1.15	cytosol	16.89	8.59	1.22	cytosol	Dubious open reading frame unlikely to encode a protein, based on available experimental and comparative sequence data; YPR014C is not an essential gene
YPR074W-A	YPR074W-A	14.73	4.41933	below threshold	13.764	3.86255	below threshold	15.7103	4.73819	below threshold	16.84	5.53	1.14	cytosol	16.49	2.92	1.11	cytosol	14.87	4.45	1	cytosol	Hypothetical protein identified by homology
YAR020C	PAU7	13.54	3.99044	below threshold	13.7665	4.283	below threshold	13.3281	3.70992	below threshold	17.14	6.74	1.26	cytosol	15.72	3.12	1.16	cytosol	15.68	6.05	1.15	cytosol	Member of the seripauperin multigene family, active during alcoholic fermentation, regulated by anaerobiosis, inhibited by oxygen, repressed by heme
YEL049W	PAU2	13.22	4.03753	below threshold	13.767	3.29586	below threshold	12.6846	4.55311	below threshold	16.93	6.1	1.28	cytosol	15.63	3.99	1.18	cytosol	17.11	8.02	1.29	cytosol	Member of the seripauperin multigene family encoded mainly in subtelomeric regions, active during alcoholic fermentation, regulated by anaerobiosis, negatively regulated by oxygen, repressed by heme
YPR177C	YPR177C	14.3	3.67749	below threshold	13.7831	3.50057	below threshold	14.8341	3.74614	below threshold	16.48	5.68	1.15	cytosol	16.88	3.59	1.17	cytosol	16.78	8.07	1.17	cytosol	Dubious open reading frame unlikely to encode a protein, based on available experimental and comparative sequence data; partially overlaps the 5' end of the essential PRP4 gene encoding a component of the U4/U6-U5 snRNP complex
YDL051W	LHP1	14.28	3.76047	below threshold	13.7907	3.8324	below threshold	14.7899	3.69004	below threshold	16.31	5.42	1.14	cytosol	13.27	3.47	0.92	cytosol	22.41	7.97	1.56	cytosol	RNA binding protein required for maturation of tRNA and U6 snRNA precursors; acts as a molecular chaperone for RNAs transcribed by polymerase III; homologous to human La (SS-B) autoantigen
YBR023C	CHS3	13.4	3.3511	below threshold	13.7913	3.29847	below threshold	13.021	3.37543	below threshold	16.7	6.25	1.24	cytosol	16.58	3.15	1.23	cytosol	15.22	6.26	1.13	cytosol	Chitin synthase III, catalyzes the transfer of N-acetylglucosamine (GlcNAc) to chitin; required for synthesis of the majority of cell wall chitin, the chitin ring during bud emergence, and spore wall chitosan
YFL067W	YFL067W	14.59	3.96164	below threshold	13.8017	3.86746	below threshold	15.3896	3.93373	below threshold	14.57	4.6	0.99	cytosol	13.78	3.36	0.94	cytosol	16.98	5.76	1.16	cytosol	Protein of unknown function, down-regulated at low calcium levels
YDL217C	TIM22	14.55	4.92029	below threshold	13.8108	5.10093	below threshold	15.2933	4.58007	below threshold	14.9	4.69	1.02	cytosol	14.53	2.72	0.99	cytosol	16.72	5.83	1.14	cytosol	Essential core component of the mitochondrial TIM22 complex involved in insertion of polytopic proteins into the inner membrane; forms the channel through which proteins are imported
YJL143W	TIM17	13.04	4.34275	below threshold	13.8232	4.50171	below threshold	12.2778	3.81232	below threshold	15.51	5	1.18	cytosol	13.49	3.99	1.03	cytosol	18.13	5.17	1.38	cytosol	Essential subunit of the Translocase of the Inner Mitochondrial membrane (TIM23 complex); with Tim23p, contributes to the architecture and function of the import channel; may link the import motor to the core TIM23 complex
YOL161C	PAU20	14.52	3.77132	below threshold	13.8239	3.79805	below threshold	15.2363	3.60262	below threshold	18.48	5.91	1.27	cytosol	16.7	3.87	1.14	cytosol	16.02	5.86	1.1	cytosol	Protein of unknown function, member of the seripauperin multigene family encoded mainly in subtelomeric regions; expression induced by low temperature and also by anaerobic conditions; induced during alcoholic fermentation
YGL259W	YPS5	13.52	4.26158	below threshold	13.8241	4.37143	below threshold	13.2372	4.1357	below threshold	15.27	4.66	1.12	cytosol	13.5	3.43	0.99	cytosol	16.63	5.83	1.22	cytosol	Protein with similarity to GPI-anchored aspartic proteases such as Yap1p and Yap3p
YBR296C	PHO89	15.04	4.19655	below threshold	13.8452	4.46899	below threshold	16.2524	3.45146	below threshold	14.51	4.44	0.96	cytosol	16.26	3.08	1.08	cytosol	22.37	8.57	1.48	cytosol	Na+/Pi cotransporter, active in early growth phase; similar to phosphate transporters of Neurospora crassa; transcription regulated by inorganic phosphate concentrations and Pho4p
YDR149C	YDR149C	16.82	4.63091	below threshold	13.8465	3.12197	below threshold	19.8199	3.81843	cytosol	18.39	7.69	1.09	cytosol	14.4	3.52	0.85	cytosol	16.39	3.56	0.97	cytosol	Dubious open reading frame unlikely to encode a functional protein, based on available experimental and comparative sequence data; overlaps the verified gene NUM1; null mutation blocks anaerobic growth
YGR294W	PAU12	14.45	4.07665	below threshold	13.8684	3.7759	below threshold	15.044	4.24034	below threshold	19.52	5.93	1.35	cytosol	15.79	3.37	1.09	cytosol	17.32	7.37	1.19	cytosol	Protein of unknown function, member of the seripauperin multigene family encoded mainly in subtelomeric regions
YBR209W	YBR209W	14.46	4.06706	below threshold	13.8721	4.16301	below threshold	15.0529	3.86194	below threshold	16.77	5.19	1.15	cytosol	15.34	3.46	1.06	cytosol	22.2	8.71	1.53	cytosol	Dubious open reading frame unlikely to encode a protein, based on available experimental and comparative sequence data; YBR209W is not an essential gene
YLR311C	YLR311C	14.42	3.34321	below threshold	13.8805	3.32395	below threshold	14.9611	3.28148	below threshold	15.95	5.5	1.1	cytosol	15.68	3.14	1.08	cytosol	16.85	7.55	1.16	cytosol	Dubious open reading frame unlikely to encode a protein, based on available experimental and comparative sequence data
YDR273W	DON1	13.81	3.46849	below threshold	13.882	3.26897	below threshold	13.7446	3.57328	below threshold	17.23	5.95	1.24	cytosol	19.12	3.85	1.38	cytosol	27.13	7.55	1.96	cytosol	Meiosis-specific component of the spindle pole body, part of the leading edge protein (LEP) coat, forms a ring-like structure at the leading edge of the prospore membrane during meiosis II
YBR024W	SCO2	13.49	3.85353	below threshold	13.8822	4.26998	below threshold	13.112	3.11004	below threshold	13.11	4.19	0.97	cytosol	14.57	2.67	1.08	cytosol	13.79	2.24	1.02	cytosol	Protein anchored to the mitochondrial inner membrane, similar to Sco1p and may have a redundant function with Sco1p in delivery of copper to cytochrome c oxidase; interacts with Cox2p
YHR012W	VPS29	13.47	4.50087	below threshold	13.8854	5.194	below threshold	13.0739	3.45203	below threshold	14.24	4.6	1.05	cytosol	12.95	2.28	0.96	cytosol	17.15	5.95	1.27	cytosol	Endosomal protein that is a subunit of the membrane-associated retromer complex essential for endosome-to-Golgi retrograde transport; forms a subcomplex with Vps35p and Vps26p that selects cargo proteins for endosome-to-Golgi retrieval
YDL009C	YDL009C	15.14	4.04194	below threshold	13.8876	3.39858	below threshold	16.4066	4.15935	below threshold	17.52	5.9	1.15	cytosol	16.32	3.55	1.07	cytosol	14.89	3.95	0.98	cytosol	Dubious open reading frame unlikely to encode a protein, based on available experimental and comparative sequence data; partially overlaps the uncharacterized ORF YDL010W; YDL009C is not an essential gene
YNL145W	MFA2	13.65	4.00881	below threshold	13.8885	3.97584	below threshold	13.4279	4.02901	below threshold	15.76	5.34	1.15	cytosol	15.24	3.34	1.11	cytosol	NA	NA	NA	cytosol	Mating pheromone a-factor, made by a cells; interacts with alpha cells to induce cell cycle arrest and other responses leading to mating; biogenesis involves C-terminal modification, N-terminal proteolysis, and export; also encoded by MFA1
YDR403W	DIT1	13.38	3.06902	below threshold	13.8906	2.98444	below threshold	12.8868	3.07546	below threshold	15.99	5.2	1.19	cytosol	13.9	2.61	1.03	cytosol	18	5.21	1.34	cytosol	Sporulation-specific enzyme required for spore wall maturation, involved in the production of a soluble LL-dityrosine-containing precursor of the spore wall; transcripts accumulate at the time of prospore enclosure
YBR164C	ARL1	12.69	3.93637	below threshold	13.8923	3.81928	below threshold	11.5057	3.77474	below threshold	14.26	4.7	1.12	cytosol	13.33	2.77	1.04	cytosol	16.45	5.82	1.29	cytosol	Soluble GTPase with a role in regulation of membrane traffic; regulates potassium influx; G protein of the Ras superfamily, similar to ADP-ribosylation factor
YKR040C	YKR040C	15.5	3.88987	below threshold	13.8929	3.75102	below threshold	17.1278	3.39825	below threshold	15.59	4.54	1	cytosol	17.22	3.53	1.11	cytosol	16.88	7.43	1.08	cytosol	Dubious open reading frame unlikely to encode a protein, based on available experimental and comparative sequence data; partially overlaps the uncharacterized ORF YKR041W
YBR250W	SPO23	14.51	4.33885	below threshold	13.9038	3.93381	below threshold	15.1353	4.48174	below threshold	17.49	5.71	1.2	cytosol	16.78	3.15	1.15	cytosol	17.84	9.6	1.22	cytosol	Protein of unknown function; associates with meiosis-specific protein Spo1p
YPL170W	DAP1	13.62	3.63152	below threshold	13.9064	3.47674	below threshold	13.3534	3.76736	below threshold	15.59	5.53	1.14	cytosol	14.04	3.37	1.03	cytosol	16.78	6.99	1.23	cytosol	Heme-binding protein involved in regulation of cytochrome P450 protein Erg11p; damage response protein, related to mammalian membrane progesterone receptors; mutations lead to defects in telomeres, mitochondria, and sterol synthesis
YMR304C-A	YMR304C-A	14.41	3.81493	below threshold	13.9123	3.78787	below threshold	14.918	3.82612	below threshold	16.57	5.36	1.14	cytosol	15.46	3.73	1.07	cytosol	17.11	8.06	1.18	cytosol	Dubious open reading frame unlikely to encode a protein, based on available experimental and comparative sequence data; partially overlaps the verified gene SCW10
YJL158C	CIS3	13.71	3.37818	below threshold	13.9407	3.69182	below threshold	13.4837	2.79147	below threshold	14.72	5.19	1.07	cytosol	12.61	3.03	0.92	cytosol	17.55	5.46	1.27	cytosol	Mannose-containing glycoprotein constituent of the cell wall; member of the PIR (proteins with internal repeats) family
YGR147C	NAT2	14.43	3.61239	below threshold	13.9424	3.74747	below threshold	14.9355	3.29716	below threshold	16.51	5.26	1.14	cytosol	15.14	3.3	1.04	cytosol	15	6.76	1.03	cytosol	Protein with an apparent role in acetylation of N-terminal methionine residues
YNL259C	ATX1	14.67	4.16179	below threshold	13.9428	3.85728	below threshold	15.4034	4.52738	below threshold	17.55	6.07	1.19	cytosol	16.62	3.66	1.13	cytosol	15.27	7.96	1.04	cytosol	Cytosolic copper metallochaperone that transports copper to the secretory vesicle copper transporter Ccc2p for eventual insertion into Fet3p, which is a multicopper oxidase required for high-affinity iron uptake
YJL166W	QCR8	14.53	3.82973	below threshold	13.9542	4.36655	below threshold	15.1178	3.29328	below threshold	17.64	5.68	1.21	cytosol	15.29	3.43	1.05	cytosol	13.49	5.37	0.92	cytosol	Subunit 8 of ubiquinol cytochrome-c reductase complex, which is a component of the mitochondrial inner membrane electron transport chain; oriented facing the intermembrane space; expression is regulated by Abf1p and Cpf1p
YLR138W	NHA1	15.15	4.18904	below threshold	13.956	4.20111	below threshold	16.3583	3.93519	below threshold	15.25	4.9	1	cytosol	15.65	3.04	1.03	cytosol	16.92	5.09	1.11	cytosol	Na+/H+ antiporter involved in sodium and potassium efflux through the plasma membrane; required for alkali cation tolerance at acidic pH
YGL045W	RIM8	16.53	4.15624	below threshold	13.9608	3.111	below threshold	19.1022	3.70393	cytosol	17.51	6.94	1.05	cytosol	14.37	2.43	0.86	cytosol	16.01	2.63	0.96	cytosol	Protein involved in proteolytic activation of Rim101p in response to alkaline pH; interacts with ESCRT-1 subunits Stp22p and Vps28p; essential for anaerobic growth; member of the arrestin-related trafficking adaptor family
YER189W	YER189W	15.43	3.90262	below threshold	13.9646	4.20313	below threshold	16.9184	3.27583	below threshold	16.19	5.31	1.04	cytosol	19.02	3.3	1.23	cytosol	16.43	4.92	1.06	cytosol	Putative protein of unknown function
YCR001W	YCR001W	14.73	3.96904	below threshold	13.9694	3.99276	below threshold	15.5	3.82734	below threshold	16.59	5.3	1.12	cytosol	15.39	3.25	1.04	cytosol	17.44	7.62	1.18	cytosol	Dubious open reading frame unlikely to encode a protein, based on available experimental and comparative sequence data; YCR001W is not an essential gene
YBR186W	PCH2	14.15	3.70485	below threshold	13.9736	3.71257	below threshold	14.3463	3.69883	below threshold	17.1	5.9	1.2	cytosol	14.75	2.93	1.04	cytosol	17.45	6.17	1.23	cytosol	Nucleolar component of the pachytene checkpoint, which prevents chromosome segregation when recombination and chromosome synapsis are defective; also represses meiotic interhomolog recombination in the rDNA
YFL068W	YFL068W	13.88	4.03997	below threshold	13.9772	4.04557	below threshold	13.8095	4.03407	below threshold	15.07	4.83	1.08	cytosol	14.91	2.99	1.07	cytosol	18.32	8.18	1.31	cytosol	Putative protein of unknown function
YIL136W	OM45	13.6	4.00458	below threshold	14	4.55743	below threshold	13.2144	3.11057	below threshold	15.18	5.04	1.11	cytosol	15.22	3.15	1.11	cytosol	16.49	5.97	1.21	cytosol	Protein of unknown function, major constituent of the mitochondrial outer membrane; located on the outer (cytosolic) face of the outer membrane
YDR488C	PAC11	14.73	3.74896	below threshold	14.0087	3.16481	below threshold	15.4692	3.7897	below threshold	16.9	5.67	1.14	cytosol	16.83	4.04	1.14	cytosol	17.86	7.94	1.21	cytosol	Dynein intermediate chain, acts in the cytoplasmic dynein pathway, forms cortical cytoplasmic microtubule capture site with Num1p; null mutant is defective in nuclear migration, essential in the absence of CIN8
YFL042C	YFL042C	13.74	3.01726	below threshold	14.0197	2.07131	below threshold	13.4876	3.26467	below threshold	16.47	6.11	1.19	cytosol	12.76	2.92	0.92	cytosol	19.47	3.45	1.41	cytosol	Putative protein of unknown function; YFL042C is not an essential gene
YJR066W	TOR1	14.18	3.33747	below threshold	14.0222	3.61304	below threshold	14.3426	3.03795	below threshold	13.75	3.89	0.96	cytosol	15.24	3.08	1.07	cytosol	16.22	7	1.14	cytosol	PIK-related protein kinase and rapamycin target; subunit of TORC1, a complex that controls growth in response to nutrients by regulating translation, transcription, ribosome biogenesis, nutrient transport and autophagy; involved in meiosis
YNL054W	VAC7	14.82	3.98177	below threshold	14.0238	4.17636	below threshold	15.6329	3.6468	below threshold	17.69	6.15	1.19	cytosol	16.89	3.52	1.13	cytosol	19.34	5.52	1.3	cytosol	Integral vacuolar membrane protein involved in vacuole inheritance and morphology; activates Fab1p kinase activity under basal conditions and also after hyperosmotic shock
YLR280C	YLR280C	14.38	3.71467	below threshold	14.0279	3.81775	below threshold	14.7485	3.61023	below threshold	16.2	4.64	1.12	cytosol	14.51	3.86	1	cytosol	17.01	7.72	1.18	cytosol	Dubious open reading frame unlikely to encode a functional protein, based on available experimental and comparative sequence data
YLR232W	YLR232W	14.78	3.92347	below threshold	14.032	3.98991	below threshold	15.5359	3.7976	below threshold	18.53	5.18	1.25	cytosol	17.87	3.59	1.2	cytosol	15.52	6.74	1.05	cytosol	Dubious open reading frame unlikely to encode a protein, based on available experimental and comparative sequence data; partially overlaps the verified gene BNA5
YHL008C	YHL008C	15.09	3.83746	below threshold	14.0348	3.90712	below threshold	16.1689	3.4578	below threshold	15.41	4.9	1.02	cytosol	13.36	4.19	0.88	cytosol	15.58	4.88	1.03	cytosol	Putative protein of unknown function, may be involved in the uptake of chloride ions; does not appear to be involved in monocarboxylic acid transport; green fluorescent protein (GFP)-fusion protein localizes to the vacuole
YBL044W	YBL044W	14.43	4.23106	below threshold	14.0348	4.37287	below threshold	14.8379	4.00578	below threshold	17.95	6.31	1.24	cytosol	15.03	3.36	1.04	cytosol	17.18	8.64	1.19	cytosol	Putative protein of unknown function; YBL044W is not an essential protein
YLR184W	YLR184W	13.9	3.51636	below threshold	14.0385	3.30504	below threshold	13.7837	3.64066	below threshold	15.48	5.82	1.11	cytosol	15.33	4.08	1.1	cytosol	16.67	3.69	1.19	cytosol	Dubious ORF unlikely to encode a functional protein, based on available experimental and comparative sequence data
YPR156C	TPO3	14.78	4.65058	below threshold	14.0452	5.17446	below threshold	15.5362	4.20794	below threshold	15.09	4.68	1.02	cytosol	14.46	4.17	0.97	cytosol	14.9	4.64	1	cytosol	Polyamine transport protein specific for spermine; localizes to the plasma membrane; member of the major facilitator superfamily
YPL101W	ELP4	14.47	3.53013	below threshold	14.0465	3.64744	below threshold	14.904	3.16125	below threshold	15.03	5.52	1.03	cytosol	17.11	3.58	1.18	cytosol	16.8	3.23	1.16	cytosol	Subunit of Elongator complex, which is required for modification of wobble nucleosides in tRNA; required for Elongator structural integrity
YIR013C	GAT4	14.98	3.57925	below threshold	14.0467	3.72458	below threshold	15.9399	3.20356	below threshold	16.73	6.99	1.11	cytosol	16.04	3.53	1.07	cytosol	16.33	6.62	1.08	cytosol	Protein containing GATA family zinc finger motifs
YNR026C	SEC12	13.33	3.95372	below threshold	14.0487	3.97116	below threshold	12.6378	3.81437	below threshold	14.51	5.28	1.08	cytosol	13.08	2.78	0.98	cytosol	17.32	5.04	1.29	cytosol	Guanine nucleotide exchange factor (GEF), activates Sar1p by catalyzing the exchange of GDP for GTP; required for the initiation of COPII vesicle formation in ER to Golgi transport; glycosylated integral membrane protein of the ER
YJL152W	YJL152W	15.01	3.8676	below threshold	14.0562	3.7616	below threshold	15.9743	3.82835	below threshold	16.42	5.75	1.09	cytosol	15.18	3.47	1.01	cytosol	15	4.06	0.99	cytosol	Dubious ORF unlikely to encode a functional protein, based on available experimental and comparative sequence data
YMR264W	CUE1	13.76	4.26548	below threshold	14.0571	4.57064	below threshold	13.4725	3.93589	below threshold	15.19	5.1	1.1	cytosol	13.81	2.18	1	cytosol	16.5	4.14	1.19	cytosol	Endoplasmic reticulum membrane protein that recruits the ubiquitin-conjugating enzyme Ubc7p to the ER where it functions in protein degradation; contains a CUE domain that binds ubiquitin to facilitate intramolecular monoubiquitination
YEL016C	NPP2	14.8	3.37901	below threshold	14.0576	3.37471	below threshold	15.5674	3.20592	below threshold	17.57	6.62	1.18	cytosol	17.19	2.85	1.16	cytosol	17.47	2.65	1.17	cytosol	Nucleotide pyrophosphatase/phosphodiesterase family member; mediates extracellular nucleotide phosphate hydrolysis along with Npp1p and Pho5p; activity and expression enhanced during conditions of phosphate starvation
YEL002C	WBP1	13.86	3.86918	below threshold	14.0613	4.15889	below threshold	13.6647	2.39873	below threshold	14.08	4.42	1.01	cytosol	14.67	2.31	1.05	cytosol	15.65	4.32	1.12	cytosol	Beta subunit of the oligosaccharyl transferase (OST) glycoprotein complex; required for N-linked glycosylation of proteins in the endoplasmic reticulum
YDR509W	YDR509W	14.44	3.59207	below threshold	14.064	3.69301	below threshold	14.8244	3.49033	below threshold	16.46	6.15	1.14	cytosol	14.92	3.4	1.03	cytosol	18.22	8.74	1.26	cytosol	Dubious open reading frame unlikely to encode a functional protein, based on available experimental and comparative sequence data
YNL028W	YNL028W	14.72	3.53738	below threshold	14.069	3.15781	below threshold	15.3933	3.78868	below threshold	17.29	5.61	1.17	cytosol	15.37	4.07	1.04	cytosol	17.42	7.63	1.18	cytosol	Dubious open reading frame unlikely to encode a protein, based on available experimental and comparative sequence data
YPL016W	SWI1	14.54	3.23776	below threshold	14.0785	3.54047	below threshold	15.0207	3.09872	below threshold	16.22	5.24	1.11	cytosol	17.63	3.65	1.21	cytosol	16.3	5.91	1.12	cytosol	Subunit of the SWI/SNF chromatin remodeling complex, which regulates transcription by remodeling chromosomes; required for transcription of many genes, including ADH1, ADH2, GAL1, HO, INO1 and SUC2; can form the prion [SWI+]
YLR159W	YLR159W	13.96	3.64719	below threshold	14.0795	3.57883	below threshold	13.8655	3.68661	below threshold	16.76	5.7	1.19	cytosol	15.8	3.17	1.13	cytosol	17.88	8.35	1.28	cytosol	Putative protein of unknown function; YLR156W, YLR159W, and YLR161W are three identical open reading frames encoded near the ribosomal DNA region of chromosome 12
YFR012W-A	YFR012W-A	14.6	3.97255	below threshold	14.0797	3.60776	below threshold	15.1378	4.26629	below threshold	17.86	4.84	1.22	cytosol	15.32	3.73	1.04	cytosol	15.92	6.76	1.09	cytosol	Putative protein of unknown function; identified by homology
YLR207W	HRD3	14.99	4.31656	below threshold	14.0966	4.55893	below threshold	15.9086	3.87499	below threshold	15.65	4.84	1.04	cytosol	16.28	3.26	1.08	cytosol	17.95	3.76	1.19	cytosol	Resident protein of the ER membrane that plays a central role in ER-associated protein degradation (ERAD), forms HRD complex with Hrd1p and ERAD determinants that engages in lumen to cytosol communication and coordination of ERAD events
YML009C	MRPL39	14.05	3.63823	below threshold	14.1077	3.36215	below threshold	14.0059	3.87491	below threshold	16.47	5.93	1.17	cytosol	15.07	3.05	1.07	cytosol	15.59	7.69	1.1	cytosol	Mitochondrial ribosomal protein of the large subunit
YML077W	BET5	13.54	3.83807	below threshold	14.1122	4.01594	below threshold	12.9762	3.48505	below threshold	15.17	4.69	1.12	cytosol	14.97	3.03	1.1	cytosol	17.86	6.06	1.31	cytosol	Component of the TRAPP (transport protein particle) complex, which plays an essential role in the vesicular transport from endoplasmic reticulum to Golgi
YOR343C	YOR343C	13.94	3.68167	below threshold	14.1155	3.99273	below threshold	13.7721	3.32071	below threshold	18.05	6.56	1.29	cytosol	16.71	3.35	1.19	cytosol	17.66	7.83	1.26	cytosol	Dubious open reading frame unlikely to encode a functional protein, based on available experimental and comparative sequence data
YCR096C	HMRA2	14.59	3.94175	below threshold	14.1275	4.08952	below threshold	15.0787	3.70939	below threshold	17.58	5.54	1.2	cytosol	15.51	3.34	1.06	cytosol	16.46	5.01	1.12	cytosol	Silenced copy of a2 at HMR; similarity to Alpha2p; required along with a1p for inhibiting expression of the HO endonuclease in a/alpha HO/HO diploid cells with an active mating-type interconversion system
YOR164C	GET4	14.13	3.26372	below threshold	14.1355	2.9944	below threshold	NA	NA	technical problem	NA	NA	NA	cytosol	NA	NA	NA	cytosol	NA	NA	NA	technical problem	Protein of unknown function, highly conserved across species and homologous to human gene C7orf20; interacts with Mdy2p; genetic interactions predict a role in insertion of tail-anchored proteins into the ER membrane
YKL220C	FRE2	15.36	4.30777	below threshold	14.1407	4.22533	below threshold	16.5835	4.18125	below threshold	14.45	4.32	0.94	cytosol	15.85	3.46	1.03	cytosol	16.9	5.62	1.1	cytosol	Ferric reductase and cupric reductase, reduces siderophore-bound iron and oxidized copper prior to uptake by transporters; expression induced by low iron levels but not by low copper levels
YGR143W	SKN1	14.41	4.49218	below threshold	14.1411	5.00626	below threshold	14.6926	4.21665	below threshold	14.65	4.31	1.01	cytosol	15.04	4.42	1.04	cytosol	17.2	6.77	1.19	cytosol	Protein involved in sphingolipid biosynthesis; type II membrane protein with similarity to Kre6p
YKL188C	PXA2	14.95	4.10901	below threshold	14.1557	4.23929	below threshold	15.7525	3.8041	below threshold	14.38	5.13	0.96	cytosol	14.53	2.58	0.97	cytosol	18.69	3.34	1.25	cytosol	Subunit of a heterodimeric peroxisomal ATP-binding cassette transporter complex (Pxa1p-Pxa2p), required for import of long-chain fatty acids into peroxisomes; similarity to human adrenoleukodystrophy transporter and ALD-related proteins
YLR021W	IRC25	14.81	3.95119	below threshold	14.1559	3.80785	below threshold	15.4729	4.01591	below threshold	15.27	5.21	1.03	cytosol	17.29	4.21	1.16	cytosol	17.2	4.41	1.16	cytosol	Component of a heterodimeric Poc4p-Irc25p chaperone involved in assembly of alpha subunits into the 20S proteasome; may regulate formation of proteasome isoforms with alternative subunits under different conditions
YJR038C	YJR038C	14.56	4.83843	below threshold	14.1584	5.03364	below threshold	14.9854	3.96845	below threshold	16.67	6.73	1.14	cytosol	16.56	2.94	1.13	cytosol	15.31	3.72	1.05	cytosol	Dubious open reading frame unlikely to encode a functional protein, based on available experimental and comparative sequence data
YPL147W	PXA1	15.29	4.4158	below threshold	14.1597	4.66114	below threshold	16.4461	3.97341	below threshold	15.6	5.41	1.01	cytosol	16.59	3.42	1.08	cytosol	17.16	5.63	1.12	cytosol	Subunit of a heterodimeric peroxisomal ATP-binding cassette transporter complex (Pxa1p-Pxa2p), required for import of long-chain fatty acids into peroxisomes; similarity to human adrenoleukodystrophy transporter and ALD-related proteins
YOR122C	PFY1	16.45	3.95966	below threshold	14.1653	2.69053	below threshold	18.7514	3.76907	below threshold	13.43	27.65	0.81	cytosol	15.31	2.53	0.93	cytosol	15.47	2.53	0.94	cytosol	Profilin, actin- and phosphatidylinositol 4,5-bisphosphate-binding protein, involved in cytoskeleton organization, required for normal timing of actin polymerization in response to thermal stress; localizes to plasma membrane and cytosol
YBL112C	YBL112C	15.21	4.31756	below threshold	14.1705	4.39711	below threshold	16.2611	3.96557	below threshold	16.06	5.6	1.05	cytosol	16.71	3.64	1.09	cytosol	17.05	8.74	1.12	cytosol	Putative protein of unknown function; YBL112C is contained within TEL02L
YBL108C-A	PAU9	14.54	3.44828	below threshold	14.1713	3.12361	below threshold	14.9283	3.65706	below threshold	16.99	6.59	1.16	cytosol	15.82	3.96	1.08	cytosol	14.73	7.02	1.01	cytosol	Protein of unknown function, member of the seripauperin multigene family encoded mainly in subtelomeric regions
YPL035C	YPL035C	14.98	3.62711	below threshold	14.1733	3.49884	below threshold	15.7987	3.60072	below threshold	17.23	5.62	1.15	cytosol	15.64	3.53	1.04	cytosol	16.61	6.93	1.1	cytosol	Dubious open reading frame unlikely to encode a protein, based on available experimental and comparative sequence data; partially overlaps the uncharacterized gene YPL034W; YPL035C is not an essential gene
YML052W	SUR7	13.99	3.7944	below threshold	14.1813	4.02143	below threshold	13.816	3.43363	below threshold	15.25	5.25	1.08	cytosol	13.16	3.69	0.94	cytosol	19.33	5.23	1.38	cytosol	Plasma membrane protein that localizes to furrow-like invaginations (MCC patches); component of eisosomes; associated with endocytosis, along with Pil1p and Lsp1p; sporulation and plasma membrane sphingolipid content are altered in mutants
YCL001W-B	YCL001W-B	13.94	4.45401	below threshold	14.1823	4.31752	below threshold	13.7039	4.5397	below threshold	16.61	6.55	1.19	cytosol	15.61	3.35	1.11	cytosol	15.79	6.64	1.13	cytosol	Putative protein of unknown function; identified by homology
YBR293W	VBA2	14.51	3.98491	below threshold	14.1922	3.68875	below threshold	14.8351	4.14642	below threshold	14.7	4.41	1.01	cytosol	16.34	3.56	1.12	cytosol	15.92	4.86	1.09	cytosol	Permease of basic amino acids in the vacuolar membrane
YGR273C	IBI1	15.77	3.83608	below threshold	14.1951	3.6738	below threshold	17.3633	3.4922	below threshold	15.64	5.95	0.99	cytosol	16.29	2.77	1.03	cytosol	17.11	8.4	1.08	cytosol	Putative protein of unknown function; expression downregulated by treatment with 8-methoxypsoralen plus UVA irradiation; YGR273C is not an essential gene
YDL240C-A	YDL240C-A	13.87	4.65655	below threshold	14.2026	4.55114	below threshold	13.5549	4.69526	below threshold	15.84	4.78	1.14	cytosol	16.58	3.87	1.19	cytosol	14.96	4.87	1.07	cytosol	Dubious open reading frame unlikely to encode a protein, based on available experimental and comparative sequence data; identified by sequence comparison with hemiascomycetous yeast species
YMR242C	RPL20A	15.5	3.45104	below threshold	14.2042	3.33466	below threshold	16.8193	3.28597	below threshold	14.95	5.36	0.96	cytosol	17.1	3.37	1.1	cytosol	17.14	2.92	1.1	cytosol	Protein component of the large (60S) ribosomal subunit, nearly identical to Rpl20Bp and has similarity to rat L18a ribosomal protein
YFL050C	ALR2	14.99	4.13505	below threshold	14.2143	4.08448	below threshold	15.7811	3.99092	below threshold	14.3	5.15	0.95	cytosol	16.11	2.58	1.07	cytosol	16.53	5.06	1.1	cytosol	Probable Mg(2+) transporter; overexpression confers increased tolerance to Al(3+) and Ga(3+) ions; plays a role in regulating Ty1 transposition
YFL059W	SNZ3	13.54	4.06105	below threshold	14.2144	3.29584	below threshold	12.8787	4.2335	below threshold	NA	NA	NA	cytosol	16.3	3.15	1.2	cytosol	NA	NA	NA	technical problem	Member of a stationary phase-induced gene family; transcription of SNZ2 is induced prior to diauxic shift, and also in the absence of thiamin in a Thi2p-dependent manner; forms a coregulated gene pair with SNO3
YPR159W	KRE6	14.65	3.79888	below threshold	14.2149	3.7267	below threshold	15.1063	3.83715	below threshold	15.1	5.14	1.03	cytosol	16.07	3.35	1.09	cytosol	16.47	5.82	1.12	cytosol	Protein required for beta-1,6 glucan biosynthesis; putative beta-glucan synthase; appears functionally redundant with Skn1p
YJL219W	HXT9	14.55	4.08512	below threshold	14.2229	4.13129	below threshold	14.886	4.08487	below threshold	15.29	5.71	1.05	cytosol	15.8	4.4	1.08	cytosol	17.42	4.51	1.19	cytosol	Putative hexose transporter that is nearly identical to Hxt11p, has similarity to major facilitator superfamily (MFS) transporters, expression of HXT9 is regulated by transcription factors Pdr1p and Pdr3p
YDR167W	TAF10	15.3	3.77164	below threshold	14.2276	3.35907	below threshold	16.402	3.96448	below threshold	17.12	6.63	1.11	cytosol	12.61	2.35	0.82	cytosol	19.66	4.21	1.28	cytosol	Subunit (145 kDa) of TFIID and SAGA complexes, involved in RNA polymerase II transcription initiation and in chromatin modification
YEL075C	YEL075C	14.64	4.46074	below threshold	14.2364	4.79234	below threshold	15.0554	3.54878	below threshold	15.42	5.09	1.05	cytosol	16.9	2.98	1.15	cytosol	16.38	3.98	1.11	cytosol	Putative protein of unknown function
YPL203W	TPK2	14.12	3.89945	below threshold	14.2478	4.32659	below threshold	14.0024	3.48418	below threshold	13.23	3.89	0.93	cytosol	14.2	2.39	1	cytosol	13.9	3.73	0.98	cytosol	cAMP-dependent protein kinase catalytic subunit; promotes vegetative growth in response to nutrients via the Ras-cAMP signaling pathway; partially redundant with Tpk1p and Tpk3p; localizes to P-bodies during stationary phase
YAR033W	MST28	13.89	3.98226	below threshold	14.2485	4.03009	below threshold	13.5466	3.90719	below threshold	15.59	5.04	1.12	cytosol	13.14	2.73	0.94	cytosol	20.94	7.46	1.5	cytosol	Putative integral membrane protein, involved in vesicle formation; forms complex with Mst27p; member of DUP240 gene family; binds COPI and COPII vesicles
YCR018C	SRD1	16.56	4.0168	below threshold	14.251	3.34186	below threshold	18.8858	3.671	below threshold	15.38	5.29	0.92	cytosol	14.59	3.05	0.88	cytosol	17.1	3.32	1.03	cytosol	Protein involved in the processing of pre-rRNA to mature rRNA; contains a C2/C2 zinc finger motif; srd1 mutation suppresses defects caused by the rrp1-1 mutation
YOR008W-B	YOR008W-B	14.89	3.78173	below threshold	14.2529	3.87592	below threshold	15.5359	3.5001	below threshold	15.76	4.99	1.05	cytosol	NA	NA	NA	cytosol	NA	NA	NA	cytosol	Dubious open reading frame unlikely to encode a protein, based on available experimental and comparative sequence data
YOR348C	PUT4	14.27	3.81055	below threshold	14.2574	3.97115	below threshold	14.2925	3.59345	below threshold	15.82	5.05	1.1	cytosol	16.52	3.37	1.15	cytosol	17.58	5.36	1.23	cytosol	Proline permease, required for high-affinity transport of proline; also transports the toxic proline analog azetidine-2-carboxylate (AzC); PUT4 transcription is repressed in ammonia-grown cells
YNL335W	DDI3	16.7	4.81123	below threshold	14.2574	3.31816	below threshold	19.1677	4.81068	cytosol	16.3	5.95	0.97	cytosol	14.02	2.82	0.83	cytosol	16.22	2.83	0.97	cytosol	Protein of unknown function; expression is induced over 100-fold by DNA damage; induction decreased in rad6 and rad18 mutants
YHR125W	YHR125W	14.79	3.94579	below threshold	14.2647	4.0589	below threshold	15.3298	3.70199	below threshold	17.36	5.79	1.17	cytosol	15.68	3.39	1.06	cytosol	15.85	5.18	1.07	cytosol	Dubious open reading frame unlikely to encode a functional protein, based on available experimental and comparative sequence data
YKR105C	VBA5	14.74	3.92694	below threshold	14.2652	3.9523	below threshold	15.2295	3.78158	below threshold	13.78	4.56	0.93	cytosol	15	2.38	1.01	cytosol	15.58	4.76	1.05	cytosol	Putative transporter of the Major Facilitator Superfamily (MFS); proposed role as a basic amino acid permease based on phylogeny
YNR001W-A	YNR001W-A	15.08	3.72212	below threshold	14.266	3.71483	below threshold	15.9185	3.6036	below threshold	17.97	6.88	1.19	cytosol	16.77	3.02	1.11	cytosol	14.88	5.16	0.98	cytosol	Dubious open reading frame unlikely to encode a functional protein; identified by homology
YMR321C	YMR321C	15.8	4.27454	below threshold	14.269	3.82437	below threshold	17.34	4.19954	below threshold	17.8	6.75	1.12	cytosol	15.86	4.16	1	cytosol	17.13	7.1	1.08	cytosol	Putative protein of unknown function; proposed to be a palmitoylated membrane protein
YDR269C	YDR269C	14.57	3.31547	below threshold	14.2693	2.96952	below threshold	14.8912	3.56218	below threshold	16.35	4.65	1.12	cytosol	16.35	3.63	1.12	cytosol	18.44	2.78	1.26	cytosol	Dubious open reading frame unlikely to encode a functional protein, based on available experimental and comparative sequence data
YHR028C	DAP2	14.47	4.64748	below threshold	14.2697	4.58814	below threshold	14.6968	4.71125	below threshold	13.57	4.97	0.93	cytosol	17.69	3.58	1.22	cytosol	NA	NA	NA	cytosol	Dipeptidyl aminopeptidase, synthesized as a glycosylated precursor; localizes to the vacuolar membrane; similar to Ste13p
YPR018W	RLF2	14.72	3.32507	below threshold	14.2756	3.14801	below threshold	15.17	3.39778	below threshold	16.52	5.88	1.12	cytosol	14.9	3.24	1.01	cytosol	17.57	6.59	1.19	cytosol	Largest subunit (p90) of the Chromatin Assembly Complex (CAF-1) with Cac2p and Msi1p that assembles newly synthesized histones onto recently replicated DNA; involved in the maintenance of transcriptionally silent chromatin
YLR041W	YLR041W	15.44	3.713	below threshold	14.2768	3.26167	below threshold	16.6212	3.92461	below threshold	15.61	6.18	1.01	cytosol	16.07	4.15	1.04	cytosol	17.22	7.29	1.11	cytosol	Dubious open reading frame unlikely to encode a protein, based on available experimental and comparative sequence data; partially overlaps the uncharacterized ORF YLR040C
YDR082W	STN1	15.16	3.36238	below threshold	14.281	3.06395	below threshold	16.0676	3.40746	below threshold	17.9	7.2	1.18	cytosol	14.64	2.48	0.96	cytosol	14.09	2.4	0.92	cytosol	Telomere end-binding and capping protein, plays a key role with Pol12p in linking telomerase action with completion of lagging strand synthesis, and in a regulatory step required for telomere capping
YPL027W	SMA1	16.53	3.6852	below threshold	14.2959	3.21207	below threshold	18.7809	3.51487	below threshold	18.37	6.62	1.11	cytosol	13.87	2.12	0.83	cytosol	15.79	4.15	0.95	cytosol	Protein of unknown function involved in the assembly of the prospore membrane during sporulation; interacts with Spo14p
YGL051W	MST27	17.32	5.39446	below threshold	14.3101	3.04735	below threshold	20.336	5.21914	cytosol	17.84	6.11	1.02	cytosol	14.65	2.47	0.84	cytosol	16.89	4.08	0.97	cytosol	Putative integral membrane protein, involved in vesicle formation; forms complex with Mst28p; member of DUP240 gene family; binds COPI and COPII vesicles
YHR079C	IRE1	14.35	4.46196	below threshold	14.316	4.38196	below threshold	14.4002	4.53756	below threshold	17	5.97	1.18	cytosol	15.12	2.95	1.05	cytosol	16.62	6.09	1.15	cytosol	Serine-threonine kinase and endoribonuclease; transmembrane protein that mediates the unfolded protein response (UPR) by regulating Hac1p synthesis through HAC1 mRNA splicing; Kar2p binds inactive Ire1p and releases from it upon ER stress
YBL106C	SRO77	14.47	4.44159	below threshold	14.3167	4.68818	below threshold	14.6303	4.07726	below threshold	15.32	4.84	1.05	cytosol	15.4	3.51	1.06	cytosol	17.61	5.69	1.21	cytosol	Protein with roles in exocytosis and cation homeostasis; functions in docking and fusion of post-Golgi vesicles with plasma membrane; homolog of Sro7p and Drosophila lethal giant larvae tumor suppressor; interacts with SNARE protein Sec9p
YIL176C	PAU14	13.45	3.82329	below threshold	14.3194	3.91642	below threshold	12.5925	3.64204	below threshold	16.31	7.27	1.21	cytosol	14.84	3.18	1.1	cytosol	17.28	9.43	1.28	cytosol	Protein of unknown function, member of the seripauperin multigene family encoded mainly in subtelomeric regions; identical to Pau1p
YMR301C	ATM1	14.97	3.95407	below threshold	14.3213	4.13513	below threshold	15.6345	3.64117	below threshold	14.57	4.66	0.97	cytosol	15.21	2.38	1.01	cytosol	16.98	7.04	1.13	cytosol	Mitochondrial inner membrane ATP-binding cassette (ABC) transporter, exports mitochondrially synthesized precursors of iron-sulfur (Fe/S) clusters to the cytosol
YDR230W	YDR230W	13.83	3.58217	below threshold	14.328	3.22492	below threshold	13.3559	3.79706	below threshold	15.93	4.43	1.15	cytosol	14.38	3.48	1.03	cytosol	16.28	7.07	1.17	cytosol	Dubious open reading frame unlikely to encode a protein, based on available experimental and comparative sequence data; partially overlaps the verified gene COX20
YLL058W	YLL058W	14.65	3.53961	below threshold	14.338	3.65592	below threshold	14.9739	3.27876	below threshold	28.53	17.46	1.94	cytosol	16.68	3.22	1.13	cytosol	29.41	5.6	2	cytosol	Putative protein of unknown function with similarity to Str2p, which is a cystathionine gamma-synthase important in sulfur metabolism; YLL058W is not an essential gene
YPL113C	YPL113C	14.9	3.90967	below threshold	14.3386	3.50912	below threshold	15.48	3.99779	below threshold	17.23	4.76	1.15	cytosol	18.49	4.65	1.24	cytosol	24.12	6.97	1.61	cytosol	Glyoxylate reductase; acts on glyoxylate and hydroxypyruvate substrates; YPL113C is not an essential gene
YIL067C	YIL067C	14.45	4.07434	below threshold	14.3404	4.53671	below threshold	14.5606	3.46448	below threshold	14.67	4.84	1.01	cytosol	13.88	2.97	0.96	cytosol	18.17	4.69	1.25	cytosol	Uncharacterized protein of unknown function
YMR152W	YIM1	13.43	3.81698	below threshold	14.343	4.24998	below threshold	12.5273	3.00654	below threshold	15.46	5.15	1.15	cytosol	14.26	2.47	1.06	cytosol	17.37	7.35	1.29	cytosol	Protein of unknown function; null mutant displays sensitivity to DNA damaging agents; the authentic, non-tagged protein is detected in highly purified mitochondria in high-throughput studies
YIL165C	YIL165C	14.5	3.72755	below threshold	14.3436	4.04068	below threshold	14.672	3.44391	below threshold	16.81	5.41	1.15	cytosol	17.06	3.32	1.17	cytosol	17.38	4.24	1.19	cytosol	Putative protein of unknown function; in closely related species and other S. cerevisiae strain backgrounds YIL165C and adjacent ORF, YIL164C, likely constitute a single ORF encoding a nitrilase gene
YKR076W	ECM4	14.42	3.89902	below threshold	14.3447	4.152	below threshold	14.5191	3.65582	below threshold	17.31	5.17	1.19	cytosol	19.47	3.93	1.34	cytosol	27.66	7.29	1.91	cytosol	Omega class glutathione transferase; not essential; similar to Ygr154cp; green fluorescent protein (GFP)-fusion protein localizes to the cytoplasm
YPL283C	YRF1-7	15.12	3.48094	below threshold	14.3459	3.15307	below threshold	15.9052	3.67334	below threshold	14.99	5.73	0.99	cytosol	16.03	2.97	1.05	cytosol	17.9	3.76	1.18	cytosol	Helicase encoded by the Y' element of subtelomeric regions, highly expressed in the mutants lacking the telomerase component TLC1; potentially phosphorylated by Cdc28p
YLR264W	RPS28B	14.1	3.90019	below threshold	14.3483	4.28788	below threshold	13.8714	3.65976	below threshold	18.34	6.53	1.3	cytosol	13.73	2.78	0.97	cytosol	16.41	7.11	1.16	cytosol	Protein component of the small (40S) ribosomal subunit; nearly identical to Rps28Ap and has similarity to rat S28 ribosomal protein
YBR174C	YBR174C	15.23	3.60775	below threshold	14.3523	3.20564	below threshold	16.1352	3.83888	below threshold	15.89	5.08	1.04	cytosol	18.64	5.2	1.22	cytosol	15.65	3.42	1.02	cytosol	Dubious open reading frame unlikely to encode a protein, based on available experimental and comparative sequence data; partially overlaps the verified ORF YBR175W; null mutant is viable and sporulation defective
YPL205C	YPL205C	14.13	3.50963	below threshold	14.3584	3.43586	below threshold	13.9181	3.56849	below threshold	17.64	4.97	1.24	cytosol	15.44	3.34	1.09	cytosol	17.04	7.79	1.2	cytosol	Hypothetical protein; deletion of locus affects telomere length
YIL117C	PRM5	14.33	4.28922	below threshold	14.3588	4.75789	below threshold	14.3292	3.51883	below threshold	14.87	4.94	1.03	cytosol	13.29	2.97	0.92	cytosol	18.1	6.16	1.26	cytosol	Pheromone-regulated protein, predicted to have 1 transmembrane segment; induced during cell integrity signaling
YMR292W	GOT1	14.08	4.38003	below threshold	14.3611	4.49502	below threshold	13.8049	4.24641	below threshold	15.75	5.04	1.11	cytosol	14.1	2.93	1	cytosol	17.24	6.56	1.22	cytosol	Evolutionarily conserved non-essential protein present in early Golgi cisternae that may be involved in ER-Golgi transport at a step after vesicle tethering to Golgi membranes, exhibits membrane topology similar to that of Sft2p
YEL013W	VAC8	14.07	4.01848	below threshold	14.3696	3.95105	below threshold	13.7875	4.07119	below threshold	14.21	4.87	1	cytosol	15.01	3.51	1.06	cytosol	17.67	3.5	1.25	cytosol	Phosphorylated and palmitoylated vacuolar membrane protein that interacts with Atg13p, required for the cytoplasm-to-vacuole targeting (Cvt) pathway; interacts with Nvj1p to form nucleus-vacuole junctions
YPL277C	YPL277C	15.6	3.90552	below threshold	14.3777	2.80516	below threshold	16.8491	4.4323	below threshold	16.48	4.7	1.05	cytosol	15.19	3.51	0.97	cytosol	13.11	2.32	0.83	cytosol	Putative protein of unknown function; localized to the membranes; gene expression regulated by copper levels
YMR093W	UTP15	15.32	2.94591	below threshold	14.3805	2.8666	below threshold	16.2633	2.80093	below threshold	18.14	7.37	1.18	cytosol	14.12	2.1	0.92	cytosol	15.31	2.38	0.99	cytosol	Nucleolar protein, component of the small subunit (SSU) processome containing the U3 snoRNA that is involved in processing of pre-18S rRNA
YOR282W	YOR282W	15.24	4.21565	below threshold	14.3829	4.20853	below threshold	16.1013	4.09409	below threshold	16.73	5.54	1.09	cytosol	16.6	4.01	1.08	cytosol	17.57	7.09	1.15	cytosol	Dubious open reading frame unlikely to encode a protein, based on available experimental and comparative sequence data; partially overlaps essential, verified gene PLP2/YOR281C
YDL162C	YDL162C	14.32	3.55038	below threshold	14.3835	3.68629	below threshold	14.2656	3.38477	below threshold	16.88	5.24	1.17	cytosol	15.66	3.51	1.09	cytosol	17.69	9.87	1.23	cytosol	Dubious open reading frame unlikely to encode a protein, based on available experimental and comparative sequence data; partially overlaps ENT1/YDL161W, a verified gene involved in endocytosis and actin cortical patch assembly
YNR059W	MNT4	14.79	3.81548	below threshold	14.3855	3.20503	below threshold	15.2128	4.16917	below threshold	17.99	5.65	1.21	cytosol	13.43	3.21	0.9	cytosol	17.22	6.34	1.16	cytosol	Putative alpha-1,3-mannosyltransferase, not required for protein O-glycosylation
YJL028W	YJL028W	14.44	3.47094	below threshold	14.3868	3.61741	below threshold	14.5097	3.35651	below threshold	17.2	6.6	1.19	cytosol	16.78	3.51	1.16	cytosol	16.58	8.53	1.14	cytosol	Protein of unknown function; may interact with ribosomes, based on co-purification experiments
YCL054W	SPB1	14.38	3.80101	below threshold	14.3876	3.90328	below threshold	NA	NA	technical problem	NA	NA	NA	cytosol	NA	NA	NA	cytosol	NA	NA	NA	cytosol	AdoMet-dependent methyltransferase involved in rRNA processing and 60S ribosomal subunit maturation; methylates G2922 in the tRNA docking site of the large subunit rRNA and in the absence of snR52, U2921; suppressor of PAB1 mutants
YKL106C-A	YKL106C-A	14.07	3.69726	below threshold	14.3909	3.17839	below threshold	13.7662	4.00969	below threshold	16.85	5.65	1.19	cytosol	15.34	2.79	1.09	cytosol	16.48	6.82	1.17	cytosol	Putative protein of unknown function; identified by homology to uncharacterized proteins in other fungi
YER119C	AVT6	13.95	3.69717	below threshold	14.3939	3.80457	below threshold	13.5294	3.53547	below threshold	15.68	5.43	1.12	cytosol	13.44	2.83	0.96	cytosol	22.85	4.87	1.63	cytosol	Vacuolar aspartate and glutamate exporter; member of a family of seven genes (AVT1-7) related to vesicular GABA-glycine transporters; involved in compartmentalizing acidic amino acids in response to nitrogen starvation
YMR086C-A	YMR086C-A	14.51	3.22948	below threshold	14.3943	3.13513	below threshold	14.6322	3.30827	below threshold	18.44	5.79	1.27	cytosol	13.79	3.47	0.95	cytosol	16.39	4.69	1.12	cytosol	Dubious open reading frame unlikely to encode a functional protein, based on available experimental and comparative sequence data
YDR030C	RAD28	16.25	4.11515	below threshold	14.3969	3.76869	below threshold	18.1339	3.53959	below threshold	18.27	7.21	1.12	cytosol	15.27	3.34	0.93	cytosol	14.2	2.11	0.87	cytosol	Protein involved in DNA repair, related to the human CSA protein that is involved in transcription-coupled repair nucleotide excision repair
YJR128W	YJR128W	15.29	4.01341	below threshold	14.4108	4.08995	below threshold	16.1803	3.79025	below threshold	17.72	5.62	1.15	cytosol	14.36	3.06	0.93	cytosol	16.22	3	1.06	cytosol	Dubious open reading frame unlikely to encode a protein, based on available experimental and comparative sequence data; partially overlaps the verified ORF RSF2
YBR090C	YBR090C	16.92	3.62656	below threshold	14.4163	3.08194	below threshold	19.4487	3.6459	cytosol	15.73	5.33	0.92	cytosol	14.9	3.17	0.88	cytosol	15.94	3.97	0.94	cytosol	Putative protein of unknown function; green fluorescent protein (GFP)-fusion protein localizes to the cytoplasm and nucleus
YLR463C	YLR463C	15.67	3.33483	below threshold	14.4288	3.14852	below threshold	16.9287	3.16426	below threshold	15.56	5.38	0.99	cytosol	16.24	3.65	1.03	cytosol	18.39	7.36	1.17	cytosol	Dubious open reading frame unlikely to encode a protein, based on available experimental and comparative sequence data; overlaps the uncharacterized ORFs YLR462W and YLR464W
YPL268W	PLC1	14.25	4.61155	below threshold	14.4296	5.05384	below threshold	14.0844	4.10183	below threshold	16.2	5.1	1.13	cytosol	15.2	2.87	1.06	cytosol	16.69	5.2	1.17	cytosol	Phospholipase C, hydrolyzes phosphatidylinositol 4,5-biphosphate (PIP2) to generate the signaling molecules inositol 1,4,5-triphosphate (IP3) and 1,2-diacylglycerol (DAG); involved in regulating many cellular processes
YDR525W	API2	14.3	3.65375	below threshold	14.4367	3.60645	below threshold	14.199	3.69007	below threshold	17.34	5.35	1.21	cytosol	15.59	3.89	1.08	cytosol	16.79	8.71	1.17	cytosol	Dubious open reading frame, unlikely to encode a protein; not conserved in closely related Saccharomyces species; 26% of ORF overlaps the dubious ORF YDR524C-A; insertion mutation in a cdc34-2 mutant background causes altered bud morphology
YML089C	YML089C	14.62	3.65108	below threshold	14.4407	3.56126	below threshold	14.8063	3.74327	below threshold	16.62	7.01	1.13	cytosol	18.09	4.12	1.23	cytosol	17.43	9.71	1.19	cytosol	Dubious open reading frame unlikely to encode a functional protein, based on available experimental and comparative sequence data; expression induced by calcium shortage
YDR071C	PAA1	15.05	4.09111	below threshold	14.4425	3.9542	below threshold	15.6849	4.24086	below threshold	14.44	5.81	0.95	cytosol	16.5	3.4	1.09	cytosol	17.76	6.23	1.17	cytosol	Polyamine acetyltransferase; acetylates polyamines (e.g. putrescine, spermidine, spermine) and also aralkylamines (e.g. tryptamine, phenylethylamine); may be involved in transcription and/or DNA replication
YJL119C	YJL119C	14.9	3.9308	below threshold	14.452	3.61212	below threshold	15.3666	4.22871	below threshold	16.29	5.05	1.09	cytosol	16.46	4.48	1.1	cytosol	17.47	7.19	1.17	cytosol	Dubious open reading frame unlikely to encode a functional protein, based on available experimental and comparative sequence data
YDR524C	AGE1	14.52	3.94426	below threshold	14.4556	4.1904	below threshold	14.6093	3.74555	below threshold	18.72	6.99	1.28	cytosol	17.46	3.48	1.2	cytosol	15.12	7.23	1.04	cytosol	ADP-ribosylation factor (ARF) GTPase activating protein (GAP) effector, involved in the secretory and endocytic pathways; contains C2C2H2 cysteine/histidine motif
YLR211C	YLR211C	18.27	5.91895	below threshold	14.4564	3.6079	below threshold	22.0912	5.13874	cytosol	18.55	7.82	1.01	cytosol	15.64	3.71	0.85	cytosol	19.11	4.54	1.04	cytosol	Putative protein of unknown function; green fluorescent protein (GFP)-fusion protein localizes to the cytoplasm; YLR211C is not an essential gene; ORF contains an intron
YKL120W	OAC1	14.37	3.73611	below threshold	14.4603	3.44348	below threshold	14.2828	3.84297	below threshold	13.9	4.89	0.96	cytosol	14.44	2.72	1	cytosol	15.36	5.33	1.06	cytosol	Mitochondrial inner membrane transporter, transports oxaloacetate, sulfate, thiosulfate, and isopropylmalate; member of the mitochondrial carrier family
YNL174W	YNL174W	15.36	4.02885	below threshold	14.4611	4.32825	below threshold	16.2769	3.28261	below threshold	16.42	5.44	1.06	cytosol	16.4	2.86	1.06	cytosol	16.5	3.53	1.07	cytosol	Dubious open reading frame unlikely to encode a protein, based on available experimental and comparative sequence data; overlaps the verified gene NOP13/YNL175C
YGL193C	YGL193C	14.94	3.9015	below threshold	14.4706	4.14954	below threshold	15.4204	3.50598	below threshold	17.04	5.33	1.14	cytosol	16.43	3.24	1.09	cytosol	21.94	7.03	1.46	cytosol	Haploid-specific gene repressed by a1-alpha2, turned off in sir3 null strains, absence enhances the sensitivity of rad52-327 cells to campothecin almost 100-fold
YLR366W	YLR366W	15.12	3.92367	below threshold	14.4937	3.9849	below threshold	15.7522	3.81504	below threshold	16.22	4.77	1.07	cytosol	14.27	3.12	0.94	cytosol	15.22	3.22	1	cytosol	Dubious open reading frame unlikely to encode a protein, based on available experimental and comparative sequence data; partially overlaps the dubious ORF YLR364C-A
YDR250C	YDR250C	14.86	3.58211	below threshold	14.4988	3.52904	below threshold	15.24	3.63071	below threshold	18.18	5.66	1.22	cytosol	16.59	3.28	1.11	cytosol	16.22	8.35	1.09	cytosol	Dubious open reading frame unlikely to encode a protein, based on experimental and comparative sequence data
YIL118W	RHO3	14.37	3.86861	below threshold	14.5	4.08636	below threshold	14.2534	3.44929	below threshold	14.45	5.14	1	cytosol	14.5	3.05	1	cytosol	16.97	5.05	1.18	cytosol	Non-essential small GTPase of the Rho/Rac subfamily of Ras-like proteins involved in the establishment of cell polarity; GTPase activity positively regulated by the GTPase activating protein (GAP) Rgd1p
YDL197C	ASF2	15.41	3.56639	below threshold	14.5013	3.83864	below threshold	16.3246	3.19939	below threshold	17.83	5.78	1.15	cytosol	15.17	2.68	0.98	cytosol	14.07	2.54	0.91	cytosol	Anti-silencing protein that causes derepression of silent loci when overexpressed
YOR050C	YOR050C	15.65	3.50445	below threshold	14.5069	3.08571	below threshold	16.802	3.43734	below threshold	16.56	4.89	1.05	cytosol	16.32	3.51	1.04	cytosol	16.14	4.1	1.03	cytosol	Dubious open reading frame unlikely to encode a protein, based on available experimental and comparative sequence data; null mutation is viable
YBL089W	AVT5	13.73	3.97863	below threshold	14.5077	3.60854	below threshold	12.9774	4.14655	below threshold	13.86	4.81	1	cytosol	14.67	2.62	1.06	cytosol	14.86	3.88	1.08	cytosol	Putative transporter, member of a family of seven S. cerevisiae genes (AVT1-7) related to vesicular GABA-glycine transporters
YDR190C	RVB1	14.58	3.32356	below threshold	14.5095	2.7625	below threshold	14.6639	3.49308	below threshold	17.81	5.77	1.22	cytosol	16.76	3.11	1.14	cytosol	14.27	2.28	0.97	cytosol	Essential protein involved in transcription regulation; component of chromatin remodeling complexes; required for assembly and function of the INO80 complex; also referred to as pontin; member of the RUVB-like protein family
YJL117W	PHO86	14.62	4.10726	below threshold	14.5187	4.26336	below threshold	14.7387	3.8745	below threshold	13.45	4.56	0.91	cytosol	14.81	3.06	1.01	cytosol	12.69	2.81	0.86	cytosol	Endoplasmic reticulum (ER) resident protein required for ER exit of the high-affinity phosphate transporter Pho84p, specifically required for packaging of Pho84p into COPII vesicles
YJL215C	YJL215C	14.19	3.6672	below threshold	14.5249	3.96627	below threshold	13.8791	3.47771	below threshold	17.56	5.64	1.23	cytosol	17.12	3.49	1.2	cytosol	16.8	7.61	1.18	cytosol	Dubious open reading frame unlikely to encode a protein, based on available experimental and comparative sequence data
YBR232C	YBR232C	14.04	4.06674	below threshold	14.5278	4.32657	below threshold	13.5667	3.82275	below threshold	16.7	5.43	1.18	cytosol	16.65	3.98	1.18	cytosol	16.78	9	1.19	cytosol	Dubious open reading frame unlikely to encode a protein, based on available experimental and comparative sequence data
YKL030W	YKL030W	15.32	3.68817	below threshold	14.5293	3.374	below threshold	16.1202	3.92618	below threshold	16.61	5.82	1.08	cytosol	16.14	3.42	1.05	cytosol	16.97	7.12	1.1	cytosol	Dubious open reading frame, unlikely to encode a protein; not conserved in closely related <i>Saccharomyces</i> species; partially overlaps the verified gene MAE1
YCR028C	FEN2	14.83	4.15759	below threshold	14.5309	4.27153	below threshold	15.1341	3.99842	below threshold	14.44	4.79	0.97	cytosol	15.76	3.18	1.06	cytosol	16.17	3.34	1.09	cytosol	Plasma membrane H+-pantothenate symporter; confers sensitivity to the antifungal agent fenpropimorph
YLR066W	SPC3	13.86	4.06949	below threshold	14.5385	4.14401	below threshold	13.2092	3.91764	below threshold	16.46	5.95	1.18	cytosol	15.26	3.11	1.1	cytosol	17.08	5.28	1.23	cytosol	Subunit of signal peptidase complex (Spc1p, Spc2p, Spc3p, Sec11p), which catalyzes cleavage of N-terminal signal sequences of proteins targeted to the secretory pathway; homologous to mammalian SPC22/23
YPL038W	MET31	15.52	3.54645	below threshold	14.5388	3.22771	below threshold	16.5269	3.62011	below threshold	14.64	5.02	0.94	cytosol	15.85	3.01	1.02	cytosol	15.35	4.77	0.98	cytosol	Zinc-finger DNA-binding protein, involved in transcriptional regulation of the methionine biosynthetic genes, similar to Met32p
YLR346C	YLR346C	14.76	4.59998	below threshold	14.55	4.5202	below threshold	14.9778	4.67492	below threshold	18.35	7.15	1.24	cytosol	18.49	4.6	1.25	cytosol	16.5	4.51	1.11	cytosol	Putative protein of unknown function found in mitochondria; expression is regulated by transcription factors involved in pleiotropic drug resistance, Pdr1p and Yrr1p; YLR346C is not an essential gene
YLR123C	YLR123C	14.62	3.77239	below threshold	14.5548	3.82249	below threshold	14.7024	3.74296	below threshold	17.3	5.89	1.18	cytosol	16.76	3.59	1.14	cytosol	17.77	7.97	1.21	cytosol	Dubious open reading frame unlikely to encode a protein, based on available experimental and comparative sequence data; partially overlaps the dubious ORF YLR122C; contains characteristic aminoacyl-tRNA motif
YDR459C	PFA5	14.78	4.25362	below threshold	14.5587	4.73143	below threshold	15.0292	3.87593	below threshold	16.4	5.61	1.1	cytosol	16.61	3.56	1.12	cytosol	18.59	5.91	1.25	cytosol	Palmitoyltransferase with autoacylation activity; likely functions in pathway(s) outside Ras; member of a family of putative palmitoyltransferases containing an Asp-His-His-Cys-cysteine rich (DHHC-CRD) domain
YDR120C	TRM1	14.44	3.37972	below threshold	14.5593	3.05676	below threshold	14.3346	3.58579	below threshold	17.03	4.99	1.17	cytosol	13.17	3.2	0.91	cytosol	18.79	8.42	1.3	cytosol	tRNA methyltransferase; two forms of the protein are made by alternative translation starts; localizes to both the nucleus and mitochondrion to produce the modified base N2,N2-dimethylguanosine in tRNAs in both compartments
YNL296W	YNL296W	14.86	3.40233	below threshold	14.5634	3.27764	below threshold	15.1613	3.5388	below threshold	16.18	5.89	1.08	cytosol	16.45	3.38	1.1	cytosol	16.45	4.63	1.1	cytosol	Dubious open reading frame unlikely to encode a functional protein; deletion adversely affects sporulation; deletion mutant exhibits synthetic phenotype under expression of mutant huntingtin fragment, but gene does not have human ortholog
YPR092W	YPR092W	14.41	3.88849	below threshold	14.5648	4.19217	below threshold	14.2759	3.57775	below threshold	17.52	6.55	1.21	cytosol	16.16	3.27	1.12	cytosol	16.36	7.02	1.13	cytosol	Dubious open reading frame unlikely to encode a functional protein, based on available experimental and comparative sequence data
YOR351C	MEK1	16	3.27519	below threshold	14.5671	2.57561	below threshold	17.4409	3.1867	below threshold	17.45	5.75	1.09	cytosol	14.32	2.43	0.89	cytosol	13.71	2.4	0.85	cytosol	Meiosis-specific serine/threonine protein kinase, functions in meiotic checkpoint, promotes recombination between homologous chromosomes by suppressing double strand break repair between sister chromatids
YOL037C	YOL037C	15.53	4.29602	below threshold	14.5685	4.38056	below threshold	16.5179	3.94102	below threshold	15.76	5.13	1.01	cytosol	18.51	3.62	1.19	cytosol	16.11	4.32	1.03	cytosol	Dubious open reading frame unlikely to encode a protein, based on available experimental and comparative sequence data; partially overlaps the uncharacterized ORF YOL036W
YIL106W	MOB1	13.36	3.69708	below threshold	14.5725	3.65791	below threshold	12.1623	3.3153	below threshold	15.55	4.67	1.16	cytosol	17.55	2.7	1.31	cytosol	20.71	7.69	1.54	cytosol	Component of the mitotic exit network; associates with and is required for the activation and Cdc15p-dependent phosphorylation of the Dbf2p kinase; required for cytokinesis and cell separation; component of the CCR4 transcriptional complex
YAL018C	YAL018C	14.66	3.77335	below threshold	14.5783	4.30803	below threshold	14.7685	2.98822	below threshold	14.25	4.07	0.97	cytosol	15.58	2.64	1.06	cytosol	14.52	3.13	0.98	cytosol	Putative protein of unknown function
YJL045W	YJL045W	15.3	4.44073	below threshold	14.5847	4.35146	below threshold	16.0262	4.46819	below threshold	15.35	5.17	1	cytosol	14.14	3.81	0.92	cytosol	18.97	7.99	1.23	cytosol	Minor succinate dehydrogenase isozyme; homologous to Sdh1p, the major isozyme reponsible for the oxidation of succinate and transfer of electrons to ubiquinone; induced during the diauxic shift in a Cat8p-dependent manner
YIL006W	YIA6	13.8	3.90265	below threshold	14.5858	4.16267	below threshold	13.0235	3.42244	below threshold	14.87	5.83	1.07	cytosol	15.74	2.57	1.14	cytosol	17.94	8.26	1.29	cytosol	Mitochondrial NAD+ transporter, involved in the transport of NAD+ into the mitochondria (see also YEA6); member of the mitochondrial carrier subfamily; disputed role as a pyruvate transporter; has putative mouse and human orthologs
YMR118C	YMR118C	15.19	3.37562	below threshold	14.5958	3.65765	below threshold	15.7928	2.60668	below threshold	15.54	5.95	1.02	cytosol	16.71	3.6	1.1	cytosol	22.44	4.44	1.47	cytosol	Protein of unknown function with similarity to succinate dehydrogenase cytochrome b subunit; YMR118C is not an essential gene
YKL013C	ARC19	16.02	3.67427	below threshold	14.5959	3.45128	below threshold	17.4513	3.46896	below threshold	16.39	6.04	1.02	cytosol	17.2	3.34	1.07	cytosol	16.07	4.22	1	cytosol	Subunit of the ARP2/3 complex, which is required for the motility and integrity of cortical actin patches
YMR319C	FET4	14.55	3.90015	below threshold	14.6102	4.27035	below threshold	14.5092	3.50959	below threshold	14.42	5.07	0.99	cytosol	15.63	3.1	1.07	cytosol	16.31	5.24	1.12	cytosol	Low-affinity Fe(II) transporter of the plasma membrane
YLR133W	CKI1	14.56	3.6344	below threshold	14.6115	3.26324	below threshold	14.5246	3.96187	below threshold	16.22	5.5	1.11	cytosol	13.13	3.14	0.9	cytosol	16.56	4.93	1.13	cytosol	Choline kinase, catalyzing the first step in phosphatidylcholine synthesis via the CDP-choline (Kennedy pathway); exhibits some ethanolamine kinase activity contributing to phosphatidylethanolamine synthesis via the CDP-ethanolamine pathway
YOR376W	YOR376W	15.33	3.91584	below threshold	14.6119	3.72846	below threshold	16.068	3.9733	below threshold	16.76	5.65	1.09	cytosol	15.6	3.61	1.01	cytosol	15.55	3.81	1.01	cytosol	Dubious open reading frame unlikely to encode a protein, based on available experimental and comparative sequence data; YOR376W is not an essential gene.
YIL114C	POR2	14.66	3.98209	below threshold	14.6149	4.81937	below threshold	14.7273	3.26364	below threshold	15.13	6.26	1.03	cytosol	14.59	2.11	0.99	cytosol	16.42	6.63	1.11	cytosol	Putative mitochondrial porin (voltage-dependent anion channel), related to Por1p but not required for mitochondrial membrane permeability or mitochondrial osmotic stability
YBR103C-A	YBR103C-A	15.54	4.36916	below threshold	14.6178	4.13193	below threshold	16.4813	4.43811	below threshold	16.39	6.32	1.05	cytosol	16.96	3.21	1.09	cytosol	15.16	4.68	0.97	cytosol	Dubious open reading frame unlikely to encode a protein, based on experimental and comparative sequence data; identified by homology to related yeast
YOL107W	YOL107W	13.51	3.89391	below threshold	14.6228	3.79581	below threshold	12.4138	3.78778	below threshold	12.6	4.76	0.93	cytosol	14.24	2.85	1.05	cytosol	13.08	3.27	0.96	cytosol	Putative protein of unknown function; green fluorescent protein (GFP)-fusion protein localizes to the cytoplasm and colocalizes in a punctate pattern with the early golgi/COPI vesicles; YOL107W is not an essential protein
YOL092W	YOL092W	14.32	4.11543	below threshold	14.6243	4.55501	below threshold	14.0208	3.24613	below threshold	13.89	5.18	0.97	cytosol	14.46	2.67	1	cytosol	16.51	6.65	1.15	cytosol	Putative protein of unknown function; predicted to contain six transmembrane domains and is 58% similar to the uncharacterized ORF YBR147W
YPR192W	AQY1	13.98	3.4673	below threshold	14.627	3.64739	below threshold	13.3646	3.12781	below threshold	14.63	5.07	1.04	cytosol	13.27	2.5	0.94	cytosol	14.4	4.8	1.02	cytosol	Spore-specific water channel that mediates the transport of water across cell membranes, developmentally controlled; may play a role in spore maturation, probably by allowing water outflow, may be involved in freeze tolerance
YOR316C	COT1	13.82	3.9004	below threshold	14.6288	4.21863	below threshold	13.0237	3.31816	below threshold	13.4	4.2	0.96	cytosol	15.83	3.12	1.14	cytosol	16.43	4.7	1.18	cytosol	Vacuolar transporter that mediates zinc transport into the vacuole; overexpression confers resistance to cobalt and rhodium
YFL040W	YFL040W	15.25	3.99727	below threshold	14.6328	3.76999	below threshold	15.8819	4.28735	below threshold	15.33	4.65	1	cytosol	14.23	3.21	0.93	cytosol	18.38	8.7	1.2	cytosol	Putative transporter, member of the sugar porter family; YFL040W is not an essential gene
YHR133C	NSG1	14.03	3.33249	below threshold	14.6331	3.17374	below threshold	13.4387	3.36259	below threshold	13.89	4.22	0.98	cytosol	15.55	3.7	1.1	cytosol	15.25	3.9	1.08	cytosol	Protein involved in regulation of sterol biosynthesis; specifically stabilizes Hmg2p, one of two HMG-CoA isoenzymes that catalyze the rate-limiting step in sterol biosynthesis; homolog of mammalian INSIG proteins
YOR123C	LEO1	14.91	3.46347	below threshold	14.6351	3.73737	below threshold	15.2051	3.31778	below threshold	17.01	6.14	1.14	cytosol	17.36	3.4	1.16	cytosol	18.41	4.39	1.23	cytosol	Component of the Paf1 complex, which associates with RNA polymerase II and is involved in histone methylation; plays a role in regulating Ty1 transposition
YPL136W	YPL136W	15.2	3.53389	below threshold	14.6418	3.28259	below threshold	15.7624	3.71661	below threshold	15.38	5.92	1.01	cytosol	16.56	3.78	1.08	cytosol	16.47	4.96	1.08	cytosol	Dubious open reading frame unlikely to encode a protein, based on available experimental and comparative sequence data; completely overlaps the verified gene GIP3/YPL137C
YBR301W	PAU24	14.52	3.64479	below threshold	14.6436	3.70333	below threshold	14.4027	3.60391	below threshold	19.41	5.98	1.33	cytosol	16.67	3.25	1.14	cytosol	16.19	6.3	1.11	cytosol	Cell wall mannoprotein with similarity to Tir1p, Tir2p, Tir3p, and Tir4p; member of the seripauperin multigene family encoded mainly in subtelomeric regions; expressed under anaerobic conditions, completely repressed during aerobic growth
YHL003C	LAG1	13.89	4.04343	below threshold	14.6461	4.31726	below threshold	13.1581	3.72153	below threshold	14.95	5.2	1.07	cytosol	13.94	3.49	1	cytosol	16.07	7.02	1.15	cytosol	Ceramide synthase component, involved in synthesis of ceramide from C26(acyl)-coenzyme A and dihydrosphingosine or phytosphingosine, functionally equivalent to Lac1p
YOL075C	YOL075C	14.72	3.313	below threshold	14.6467	3.2439	below threshold	14.812	3.4423	below threshold	16.51	5.69	1.12	cytosol	15.04	3.04	1.02	cytosol	14.27	5.58	0.96	cytosol	Putative ABC transporter
YKR106W	YKR106W	15.56	4.148	below threshold	14.6632	4.25112	below threshold	16.4608	3.6428	below threshold	14.67	5.83	0.94	cytosol	15.77	3.64	1.01	cytosol	15.67	5.04	1	cytosol	Protein of unconfirmed function; displays a topology characteristic of the Major Facilitators Superfamily of membrane proteins; coding sequence 98% identical to that of YCL073C
YJR020W	YJR020W	15.47	3.57844	below threshold	14.6696	3.07826	below threshold	16.2894	3.77898	below threshold	17.05	6.05	1.1	cytosol	17.24	4.34	1.11	cytosol	16.12	4.86	1.04	cytosol	Dubious open reading frame unlikely to encode a functional protein, based on available experimental and comparative sequence data
YBL094C	YBL094C	13.94	3.54489	below threshold	14.6796	3.45952	below threshold	13.2293	3.52898	below threshold	15.57	5.47	1.11	cytosol	15.51	3.06	1.11	cytosol	16.06	8.31	1.15	cytosol	Dubious open reading frame unlikely to encode a protein, based on available experimental and comparative sequence data; partially overlaps uncharacterized ORF YBL095W
YLR227C	ADY4	15.84	4.25547	below threshold	14.6843	3.95945	below threshold	17.0005	4.28119	below threshold	15.96	5.92	1	cytosol	16.84	3.1	1.06	cytosol	12.76	2.48	0.8	cytosol	Structural component of the meiotic outer plaque, which is a membrane-organizing center that assembles on the cytoplasmic face of the spindle pole body during meiosis II and triggers the formation of the prospore membrane
YNL043C	YNL043C	14.1	3.75428	below threshold	14.6879	3.47186	below threshold	13.5348	3.86374	below threshold	15.04	5.44	1.06	cytosol	17.06	4.08	1.2	cytosol	19.23	9.21	1.36	cytosol	Dubious open reading frame unlikely to encode a protein, based on available experimental and comparative sequence data; partially overlaps the verified gene YIP3/YNL044W
YLR377C	FBP1	14.58	3.5318	below threshold	14.6969	3.37528	below threshold	14.4733	3.60511	below threshold	17.75	6.05	1.21	cytosol	17.77	3.24	1.21	cytosol	24.06	6.53	1.64	cytosol	Fructose-1,6-bisphosphatase, key regulatory enzyme in the gluconeogenesis pathway, required for glucose metabolism; undergoes either proteasome-mediated or autophagy-mediated degradation depending on growth conditions; interacts with Vid30p
YLR241W	YLR241W	15.08	4.78552	below threshold	14.6989	4.06621	below threshold	15.4744	5.40054	below threshold	14.59	4.67	0.96	cytosol	15.38	3.71	1.01	cytosol	15.43	3.68	1.02	cytosol	Putative protein of unknown function, may be involved in detoxification
YPL140C	MKK2	15.53	3.66446	below threshold	14.6998	3.65178	below threshold	16.3877	3.50226	below threshold	18.4	7.46	1.18	cytosol	16.56	3.59	1.06	cytosol	15.94	2.74	1.02	cytosol	Mitogen-activated kinase kinase involved in protein kinase C signaling pathway that controls cell integrity; upon activation by Bck1p phosphorylates downstream target, Slt2p; functionally redundant with Mkk1p
YLR124W	YLR124W	14.39	3.82851	below threshold	14.7008	3.73348	below threshold	14.0912	3.88678	below threshold	18.81	8.03	1.3	cytosol	16.13	3.59	1.12	cytosol	15.88	4	1.1	cytosol	Dubious open reading frame unlikely to encode a protein, based on available experimental and comparative sequence data
YNL160W	YGP1	14.59	3.6955	below threshold	14.7016	3.89558	below threshold	14.4862	3.57376	below threshold	17.22	5.14	1.18	cytosol	18.98	3.63	1.3	cytosol	26.44	7.27	1.81	cytosol	Cell wall-related secretory glycoprotein; induced by nutrient deprivation-associated growth arrest and upon entry into stationary phase; may be involved in adaptation prior to stationary phase entry; has similarity to Sps100p
YOR072W	YOR072W	15.34	4.22901	below threshold	14.7102	4.35063	below threshold	15.9718	4.08273	below threshold	17.19	5.94	1.12	cytosol	15.13	2.72	0.98	cytosol	16.43	5.07	1.07	cytosol	Dubious open reading frame unlikely to encode a protein, based on experimental and comparative sequence data; partially overlaps the dubious gene YOR072W-A; diploid deletion strains are methotrexate, paraquat and wortmannin sensitive
YAR064W	YAR064W	13.89	3.67472	below threshold	14.7171	3.88814	below threshold	13.0773	3.2613	below threshold	16.2	5.89	1.16	cytosol	14.46	2.88	1.04	cytosol	17.83	5.9	1.28	cytosol	Putative protein of unknown function
YJL222W	VTH2	14.65	4.31965	below threshold	14.7183	4.25856	below threshold	14.6016	4.37991	below threshold	17.84	5.25	1.21	ambiguous	18.96	3.81	1.29	ambiguous	20.66	6.71	1.4	ambiguous	Putative membrane glycoprotein with strong similarity to Vth1p and Pep1p/Vps10p, may be involved in vacuolar protein sorting
YJR040W	GEF1	16.09	4.503	below threshold	14.727	4.25209	below threshold	17.471	4.44189	below threshold	16.28	6.78	1.01	cytosol	14.64	3.49	0.9	cytosol	16.58	5.83	1.03	cytosol	Voltage-gated chloride channel localized to the golgi, the endosomal system, and plasma membrane, and involved in cation homeostasis; highly homologous to vertebrate voltage-gated chloride channels
YEL071W	DLD3	16.46	4.81618	below threshold	14.7275	2.87898	below threshold	18.2081	4.85073	below threshold	16.6	5.53	1	cytosol	14.64	2.63	0.88	cytosol	14.02	2.03	0.85	cytosol	D-lactate dehydrogenase, part of the retrograde regulon which consists of genes whose expression is stimulated by damage to mitochondria and reduced in cells grown with glutamate as the sole nitrogen source, located in the cytoplasm
YLR024C	UBR2	14.95	2.90766	below threshold	14.7295	2.72236	below threshold	15.1971	3.00799	below threshold	12.95	3.99	0.86	cytosol	15.48	3.37	1.03	cytosol	19.69	7.04	1.31	cytosol	Cytoplasmic ubiquitin-protein ligase (E3); required for ubiquitylation of Rpn4p; mediates formation of a Mub1p-Ubr2p-Rad6p complex
YGL152C	YGL152C	14.92	3.58889	below threshold	14.7379	3.65625	below threshold	15.1155	3.50368	below threshold	16.69	5.55	1.11	cytosol	14.14	2.38	0.94	cytosol	17.92	3.41	1.2	cytosol	Dubious open reading frame unlikely to encode a protein, based on available experimental and comparative sequence data; partially overlaps the verified ORF PEX14/YGL153W
YBL068W	PRS4	14.5	3.54881	below threshold	14.7478	3.59742	below threshold	14.2783	3.44303	below threshold	16.67	5.36	1.14	cytosol	18.69	4.1	1.28	cytosol	22.97	8.08	1.58	cytosol	5-phospho-ribosyl-1(alpha)-pyrophosphate synthetase, synthesizes PRPP, which is required for nucleotide, histidine, and tryptophan biosynthesis; one of five related enzymes, which are active as heteromultimeric complexes
YBL108W	YBL108W	15.13	3.75989	below threshold	14.748	4.02513	below threshold	15.5261	3.40436	below threshold	16.17	5.8	1.06	cytosol	15.87	2.96	1.04	cytosol	16.57	5.54	1.09	cytosol	Dubious open reading frame unlikely to encode a protein, based on available experimental and comparative sequence data
YMR153C-A	YMR153C-A	15.86	3.59778	below threshold	14.75	3.69607	below threshold	16.9768	3.25626	below threshold	15.99	6.66	1	cytosol	17.84	3.9	1.12	cytosol	15.98	4.58	1	cytosol	Dubious open reading frame unlikely to encode a protein, based on available experimental and comparative sequence data; partially overlaps the verified gene NUP53
YFL019C	YFL019C	15.61	3.70195	below threshold	14.7538	3.7248	below threshold	16.4777	3.49744	below threshold	15.8	5.64	1.01	cytosol	16.94	4.13	1.08	cytosol	15.52	3.5	0.99	cytosol	Dubious open reading frame unlikely to encode a protein; YFL019C is not an essential gene
YJL126W	NIT2	13.77	3.38071	below threshold	14.7617	3.67786	below threshold	12.7981	3.15724	below threshold	14.55	4.95	1.05	cytosol	16.96	3.63	1.23	cytosol	16.47	7.81	1.19	cytosol	Nit protein, one of two proteins in S. cerevisiae with similarity to the Nit domain of NitFhit from fly and worm and to the mouse and human Nit protein which interacts with the Fhit tumor suppressor; nitrilase superfamily member
YJL210W	PEX2	14.09	4.21142	below threshold	14.7803	4.90136	below threshold	13.4	3.02771	below threshold	15.29	6.02	1.08	cytosol	13.56	2.52	0.96	cytosol	17.35	5.77	1.23	cytosol	RING-finger peroxin, peroxisomal membrane protein with a C-terminal zinc-binding RING domain, forms translocation subcomplex with Pex10p and Pex12p which functions in peroxisomal matrix protein import
YLR252W	YLR252W	15.03	4.08081	below threshold	14.7803	4.02927	below threshold	15.2932	4.13456	below threshold	16.57	5.88	1.1	cytosol	18.59	3.71	1.23	cytosol	16.46	4.38	1.09	cytosol	Dubious open reading frame unlikely to encode a protein, based on experimental and comparative sequence data; partially overlaps the verified gene SYM1, a mitochondrial protein involved in ethanol metabolism
YBL073W	YBL073W	14.2	3.92144	below threshold	14.7865	3.90934	below threshold	13.6264	3.88765	below threshold	16.35	5.83	1.15	cytosol	15.44	3.33	1.08	cytosol	18.75	9.79	1.32	cytosol	Dubious open reading frame unlikely to encode a protein, based on available experimental and comparative sequence data; partially overlaps the essential gene AAR2/YBL074C
YEL072W	RMD6	17.82	4.58227	below threshold	14.7898	3.13532	below threshold	20.8772	4.44304	cytosol	17.61	6.81	0.98	cytosol	16.14	2.72	0.9	cytosol	16.98	3.07	0.95	cytosol	Protein required for sporulation
YIL059C	YIL059C	14.84	3.43339	below threshold	14.7902	3.21075	below threshold	14.9054	3.67366	below threshold	16.14	5.18	1.08	cytosol	17.6	3.33	1.18	cytosol	15.52	5.25	1.04	cytosol	Dubious open reading frame unlikely to encode a protein, based on available experimental and comparative sequence data; partially overlaps the uncharacterized ORF YIL060W
YER099C	PRS2	14.79	7.97176	below threshold	14.797	4.70074	below threshold	NA	NA	technical problem	NA	NA	NA	cytosol	NA	NA	NA	cytosol	NA	NA	NA	technical problem	5-phospho-ribosyl-1(alpha)-pyrophosphate synthetase, synthesizes PRPP, which is required for nucleotide, histidine, and tryptophan biosynthesis; one of five related enzymes, which are active as heteromultimeric complexes
YIR032C	DAL3	14.48	3.92947	below threshold	14.7984	4.4021	below threshold	14.1837	3.54274	below threshold	16.51	5.56	1.13	cytosol	15.97	3.11	1.1	cytosol	19.07	7.35	1.31	cytosol	Ureidoglycolate hydrolase, converts ureidoglycolate to glyoxylate and urea in the third step of allantoin degradation; expression sensitive to nitrogen catabolite repression
YHR185C	PFS1	18.34	5.26612	below threshold	14.7994	4.22841	below threshold	21.9062	4.27467	cytosol	16.16	6.26	0.88	cytosol	13.75	3.16	0.74	cytosol	16.6	3.26	0.9	cytosol	Sporulation protein required for prospore membrane formation at selected spindle poles, ensures functionality of all four spindle pole bodies during meiosis II; not required for meiotic recombination or meiotic chromosome segregation
YBR295W	PCA1	14.55	4.05378	below threshold	14.7996	3.95023	below threshold	14.3373	4.11887	below threshold	17.52	5.36	1.2	cytosol	16.26	3.55	1.11	cytosol	14.98	3.71	1.02	cytosol	Cadmium transporting P-type ATPase; may also have a role in copper and iron homeostasis; stabilized by Cd binding, which prevents ubiquitination; S288C and other lab strains contain a G970R mutation which eliminates Cd transport function
YDR503C	LPP1	14.3	3.44188	below threshold	14.8	3.39987	below threshold	13.8096	3.44929	below threshold	15.09	4.35	1.05	cytosol	13.89	2.94	0.97	cytosol	19.44	7.05	1.35	cytosol	Lipid phosphate phosphatase, catalyzes Mg(2+)-independent dephosphorylation of phosphatidic acid (PA), lysophosphatidic acid, and diacylglycerol pyrophosphate; involved in control of the cellular levels of phosphatidylinositol and PA
YNL210W	MER1	15.39	3.94328	below threshold	14.8039	3.86927	below threshold	15.9816	3.96865	below threshold	16.06	6.46	1.04	cytosol	17.78	3.67	1.15	cytosol	15.7	4.15	1.02	cytosol	Protein with RNA-binding motifs required for meiosis-specific mRNA splicing; required for chromosome pairing and meiotic recombination
YPL257W	YPL257W	16.61	4.79283	below threshold	14.8074	4.77143	below threshold	18.4276	4.3088	below threshold	14.3	5.63	0.86	cytosol	16.03	3.93	0.96	cytosol	14.81	3.2	0.89	cytosol	Putative protein of unknown function; homozygous diploid deletion strain exhibits low budding index; physically interacts with Hsp82p; YPL257W is not an essential gene
YPL102C	YPL102C	15.09	3.87953	below threshold	14.8077	4.1383	below threshold	15.3915	3.58865	below threshold	19.3	6.1	1.27	cytosol	16.02	3.01	1.06	cytosol	15.14	2.79	1	cytosol	Dubious open reading frame, not conserved in closely related Saccharomyces species; deletion mutation enhances replication of Brome mosaic virus in S. cerevisiae, but this is likely due to effects on the overlapping gene ELP4
YFR056C	YFR056C	14.97	3.89175	below threshold	14.8099	4.01814	below threshold	15.1532	3.6324	below threshold	16.09	5.25	1.07	cytosol	17.2	3.57	1.14	cytosol	16.4	6.15	1.09	cytosol	Dubious open reading frame unlikely to encode a protein based on available experimental and comparative sequence data; partially overlaps the uncharacterized gene YFR055W
YNL124W	NAF1	15.8	3.99636	below threshold	14.8106	3.97426	below threshold	16.8022	3.77434	below threshold	17.44	5.73	1.1	cytosol	17.68	3.54	1.11	cytosol	16.4	5.97	1.03	cytosol	RNA-binding protein required for the assembly of box H/ACA snoRNPs and thus for pre-rRNA processing, forms a complex with Shq1p and interacts with H/ACA snoRNP components Nhp2p and Cbf5p; similar to Gar1p
YGL260W	YGL260W	15.7	4.02284	below threshold	14.8115	3.77917	below threshold	16.596	4.22413	below threshold	16.78	5.81	1.06	cytosol	15.97	2.61	1.01	cytosol	14.37	3.06	0.91	cytosol	Putative protein of unknown function; transcription is significantly increased in a NAP1 deletion background; deletion mutant has increased accumulation of nickel and selenium
YAL013W	DEP1	14.3	3.71139	below threshold	14.8129	3.36765	below threshold	13.8028	3.92542	below threshold	16.97	5.49	1.18	cytosol	17.02	2.97	1.19	cytosol	25.08	6.92	1.75	cytosol	Transcriptional modulator involved in regulation of structural phospholipid biosynthesis genes and metabolically unrelated genes, as well as maintenance of telomeres, mating efficiency, and sporulation
YKL224C	PAU16	15.83	4.39518	below threshold	14.8154	4.35815	below threshold	16.8596	4.27069	below threshold	15.67	5.83	0.98	cytosol	17.04	3.53	1.07	cytosol	15.28	3	0.96	cytosol	Protein of unknown function, member of the seripauperin multigene family encoded mainly in subtelomeric regions
YGR296W	YRF1-3	15.58	3.74924	below threshold	14.8164	3.05691	below threshold	16.3552	3.86768	below threshold	16.36	5.06	1.04	cytosol	17.34	3.96	1.11	cytosol	16.94	3.26	1.08	cytosol	Helicase encoded by the Y' element of subtelomeric regions, highly expressed in the mutants lacking the telomerase component TLC1; potentially phosphorylated by Cdc28p
YBR104W	YMC2	14.7	3.0416	below threshold	14.8195	3.06961	below threshold	14.6012	3.01512	below threshold	13.47	4.34	0.91	cytosol	15.25	2.6	1.03	cytosol	14.82	3.71	1	cytosol	Mitochondrial protein, putative inner membrane transporter with a role in oleate metabolism and glutamate biosynthesis; member of the mitochondrial carrier (MCF) family; has similarity with Ymc1p
YNL115C	YNL115C	14.97	4.47556	below threshold	14.8222	4.44202	below threshold	15.128	4.51343	below threshold	14.1	4.51	0.94	cytosol	15.62	2.8	1.04	cytosol	22.1	4.07	1.47	vacuole	Putative protein of unknown function; green fluorescent protein (GFP)-fusion protein localizes to mitochondria; YNL115C is not an essential gene
YAL046C	AIM1	15.75	3.93799	below threshold	14.8266	4.06032	below threshold	16.6806	3.50998	below threshold	16.31	5.5	1.03	cytosol	14.73	3.21	0.93	cytosol	16.96	5.02	1.07	cytosol	Protein involved in mitochondrial function or organization; null mutant displays elevated frequency of mitochondrial genome loss
YAL004W	YAL004W	16.68	4.35347	below threshold	14.8344	4.00602	below threshold	18.5381	3.92308	below threshold	16.18	5.39	0.97	cytosol	14.11	2.58	0.84	cytosol	15.85	2.93	0.95	cytosol	Dubious open reading frame unlikely to encode a protein, based on available experimental and comparative sequence data; completely overlaps verified gene SSA1/YAL005C
YMR272C	SCS7	15.32	3.72125	below threshold	14.8386	3.68263	below threshold	15.8164	3.70049	below threshold	17	5.18	1.1	cytosol	17.07	4.21	1.11	cytosol	25.17	6.6	1.64	cytosol	Sphingolipid alpha-hydroxylase, functions in the alpha-hydroxylation of sphingolipid-associated very long chain fatty acids, has both cytochrome b5-like and hydroxylase/desaturase domains, not essential for growth
YER039C	HVG1	14.08	3.98948	below threshold	14.8391	4.40111	below threshold	13.3364	3.37264	below threshold	14.79	4.73	1.04	cytosol	14.95	2.71	1.06	cytosol	18.19	6.32	1.29	cytosol	Protein of unknown function, has homology to Vrg4p
YOR194C	TOA1	15.78	4.65963	below threshold	14.8399	5.10025	below threshold	16.7349	4.04783	below threshold	16.57	5.42	1.04	cytosol	16.29	2.88	1.03	cytosol	19.59	4.93	1.24	cytosol	TFIIA large subunit; involved in transcriptional activation, acts as antirepressor or as coactivator; homologous to largest and second largest subunits of human and Drosophila TFIIA
YDR162C	NBP2	18.24	6.25305	below threshold	14.8413	4.32631	below threshold	21.6449	5.83793	cytosol	17.12	7.9	0.93	cytosol	15.1	3.13	0.82	cytosol	16.99	2.91	0.93	cytosol	Protein involved in the HOG (high osmolarity glycerol) pathway, negatively regulates Hog1p by recruitment of phosphatase Ptc1p the Pbs2p-Hog1p complex, found in the nucleus and cytoplasm, contains an SH3 domain that binds Pbs2p
YHL046C	PAU13	14.82	3.93223	below threshold	14.8417	4.23028	below threshold	14.8029	3.66763	below threshold	16.53	6.13	1.11	cytosol	15.88	3.18	1.07	cytosol	16.96	8.28	1.14	cytosol	Protein of unknown function, member of the seripauperin multigene family encoded mainly in subtelomeric regions; expression is induced after ethanol shock
YHR053C	CUP1-1	14.79	3.45981	below threshold	14.8496	3.43527	below threshold	14.757	3.49267	below threshold	17.3	6.25	1.16	cytosol	15.94	3.83	1.07	cytosol	15.59	2.9	1.05	cytosol	Metallothionein, binds copper and mediates resistance to high concentrations of copper and cadmium; locus is variably amplified in different strains, with two copies, CUP1-1 and CUP1-2, in the genomic sequence reference strain S288C
YJL120W	YJL120W	15.03	3.4777	below threshold	14.8542	4.0002	below threshold	15.2283	3.27476	below threshold	16.61	6.84	1.1	cytosol	16.73	3.81	1.11	cytosol	19.78	5.48	1.31	cytosol	Dubious open reading frame unlikely to encode a protein, based on available experimental and comparative sequence data; partially overlaps the verified gene YJL121C/RPE1; deletion confers sensitivity to GSAO
YPR119W	CLB2	15.88	4.56579	below threshold	14.8548	4.27303	below threshold	16.9108	4.54177	below threshold	17.53	5.55	1.1	cytosol	18.39	3.75	1.15	cytosol	13.33	2.77	0.83	cytosol	B-type cyclin involved in cell cycle progression; activates Cdc28p to promote the transition from G2 to M phase; accumulates during G2 and M, then targeted via a destruction box motif for ubiquitin-mediated degradation by the proteasome
YJL007C	YJL007C	15.4	3.87328	below threshold	14.8583	4.00968	below threshold	15.9652	3.76415	below threshold	17.32	5.68	1.12	cytosol	16.37	3.34	1.06	cytosol	16.23	4.53	1.05	cytosol	Dubious open reading frame unlikely to encode a functional protein, based on available experimental and comparative sequence data
YPL251W	YPL251W	14.85	3.67231	below threshold	14.8611	3.83045	below threshold	14.8418	3.44681	below threshold	15.2	5.01	1.02	cytosol	17.34	3.7	1.16	cytosol	15.1	4.72	1.01	cytosol	Dubious open reading frame unlikely to encode a functional protein, based on available experimental and comparative sequence data; partially overlaps 5' end of the verified, essential gene YAH1/YPL252C
YGR265W	YGR265W	14.46	3.97207	below threshold	14.867	3.67298	below threshold	14.0669	4.04967	below threshold	15.69	5.98	1.08	cytosol	15.77	3.43	1.09	cytosol	24.36	7.26	1.68	cytosol	Dubious open reading frame unlikely to encode a protein, based on available experimental and comparative sequence data; partially overlaps the verified ORF MES1/YGR264C, which encodes methionyl-tRNA synthetase
YOL118C	YOL118C	15.03	4.31096	below threshold	14.8692	4.49204	below threshold	15.2014	4.11122	below threshold	17.28	5.95	1.14	cytosol	15.68	3.38	1.04	cytosol	15.73	5.82	1.04	cytosol	Dubious open reading frame unlikely to encode a functional protein, based on available experimental and comparative sequence data
YLR019W	PSR2	14.01	4.16764	below threshold	14.8767	4.38119	below threshold	13.1695	3.76897	below threshold	13.96	5.35	0.99	cytosol	14.82	2.76	1.05	cytosol	18.43	5.74	1.31	cytosol	Functionally redundant Psr1p homolog, a plasma membrane phosphatase involved in the general stress response; required with Psr1p and Whi2p for full activation of STRE-mediated gene expression, possibly through dephosphorylation of Msn2p
YPL214C	THI6	15.56	4.85413	below threshold	14.8829	4.50653	below threshold	16.2558	5.04933	below threshold	22.64	10.86	1.45	cytosol	14.64	6.09	0.94	cytosol	28.29	5.57	1.81	cytosol	Bifunctional enzyme with thiamine-phosphate pyrophosphorylase and 4-methyl-5-beta-hydroxyethylthiazole kinase activities, required for thiamine biosynthesis; GFP-fusion protein localizes to the cytoplasm in a punctate pattern
YOR360C	PDE2	16.05	4.14601	below threshold	14.8833	4.13044	below threshold	17.2254	3.92548	below threshold	16.85	6.21	1.04	cytosol	16.52	2.94	1.02	cytosol	14.28	2.04	0.88	cytosol	High-affinity cyclic AMP phosphodiesterase, component of the cAMP-dependent protein kinase signaling system, protects the cell from extracellular cAMP, contains readthrough motif surrounding termination codon
YLR324W	PEX30	14.81	3.57959	below threshold	14.8848	3.5933	below threshold	14.75	3.53015	below threshold	17.86	5.64	1.2	cytosol	17.09	3.62	1.15	cytosol	17.1	4.15	1.15	cytosol	Peroxisomal integral membrane protein, involved in negative regulation of peroxisome number; partially functionally redundant with Pex31p; genetic interactions suggest action at a step downstream of steps mediated by Pex28p and Pex29p
YPL211W	NIP7	15.74	3.26745	below threshold	14.8925	3.40114	below threshold	16.5931	3.10157	below threshold	15.74	5.98	1	cytosol	16.51	2.92	1.04	cytosol	17.32	3.29	1.1	cytosol	Nucleolar protein required for 60S ribosome subunit biogenesis, constituent of 66S pre-ribosomal particles; physically interacts with Nop8p and the exosome subunit Rrp43p
YDL210W	UGA4	15.16	4.65626	below threshold	14.8937	5.06076	below threshold	15.4395	4.22424	below threshold	15.12	5.52	0.99	cytosol	15.9	2.6	1.04	cytosol	23.24	7.79	1.53	cytosol	Permease that serves as a gamma-aminobutyrate (GABA) transport protein involved in the utilization of GABA as a nitrogen source; catalyzes the transport of putrescine and delta-aminolevulinic acid (ALA); localized to the vacuolar membrane
YOR307C	SLY41	14.71	3.64143	below threshold	14.8944	3.78376	below threshold	14.5357	3.44164	below threshold	13.9	5.07	0.94	cytosol	14.63	2.37	0.99	cytosol	14.35	2.86	0.97	cytosol	Protein involved in ER-to-Golgi transport
YBR157C	ICS2	14.28	3.86463	below threshold	14.9021	4.31534	below threshold	13.6766	3.48268	below threshold	16.34	5.67	1.14	cytosol	17.5	3.88	1.22	cytosol	17.59	7.06	1.23	cytosol	Protein of unknown function; null mutation does not confer any obvious defects in growth, spore germination, viability, or carbohydrate utilization
YDR029W	YDR029W	15.18	4.0432	below threshold	14.9054	4.10241	below threshold	15.4764	3.95441	below threshold	15.36	6.17	1.01	cytosol	19.23	4.15	1.26	cytosol	19.85	9.49	1.3	cytosol	Dubious ORF unlikely to encode a protein, based on available experimental and comparative sequence data
YHR212C	YHR212C	14.89	3.88338	below threshold	14.9069	3.86905	below threshold	14.8833	3.89608	below threshold	15.62	5.39	1.04	cytosol	18.25	4.19	1.22	cytosol	16.72	8.44	1.12	cytosol	Dubious open reading frame unlikely to encode a functional protein, based on available experimental and comparative sequence data
YKR065C	PAM17	15.92	3.65189	below threshold	14.9075	4.19294	below threshold	16.9457	3.10045	below threshold	15.79	5.83	0.99	cytosol	16.5	3.17	1.03	cytosol	16.29	5.59	1.02	cytosol	Constituent of the Translocase of the Inner Mitochondrial membrane (TIM23 complex); proposed alternatively to be a component of the import motor (PAM complex) or to interact with and modulate the core TIM23 complex
YPL019C	VTC3	15.72	4.37968	below threshold	14.9086	4.52392	below threshold	16.548	3.96687	below threshold	14.09	4.22	0.89	cytosol	15.84	2.74	1	cytosol	18.42	5.88	1.17	cytosol	Subunit of the vacuolar transporter chaperone (VTC) complex involved in membrane trafficking, vacuolar polyphosphate accumulation, microautophagy and non-autophagic vacuolar fusion
YKL141W	SDH3	14.8	4.11404	below threshold	14.9128	4.22871	below threshold	14.6978	3.98822	below threshold	16.61	5.06	1.12	cytosol	14.55	2.39	0.98	cytosol	16.29	5.89	1.1	cytosol	Cytochrome b subunit of succinate dehydrogenase (Sdh1p, Sdh2p, Sdh3p, Sdh4p), which couples the oxidation of succinate to the transfer of electrons to ubiquinone
YOL119C	MCH4	14.13	3.62707	below threshold	14.9136	3.57034	below threshold	13.3609	3.50556	below threshold	13.79	4.55	0.97	cytosol	14.42	2.85	1.02	cytosol	14.6	3.01	1.03	cytosol	Protein with similarity to mammalian monocarboxylate permeases, which are involved in transport of monocarboxylic acids across the plasma membrane; mutant is not deficient in monocarboxylate transport
YDR196C	CAB5	15.87	3.52787	below threshold	14.9167	3.62899	below threshold	16.8494	3.0552	below threshold	17.53	6.4	1.1	cytosol	14.14	3.4	0.89	cytosol	16.56	1.85	1.04	cytosol	Probable dephospho-CoA kinase (DPCK) that catalyzes the last step in coenzyme A biosynthesis; null mutant lethality is complemented by E. coli coaE (encoding DPCK); detected in purified mitochondria in high-throughput studies
YGR141W	VPS62	16.39	4.17386	below threshold	14.9189	2.81017	below threshold	17.8765	4.26312	below threshold	18	7.15	1.09	cytosol	15.67	3.3	0.95	cytosol	13.9	2.29	0.84	cytosol	Vacuolar protein sorting (VPS) protein required for cytoplasm to vacuole targeting of proteins
YMR095C	SNO1	15.13	3.59952	below threshold	14.9214	3.7114	below threshold	15.3566	3.35737	below threshold	17.87	6	1.18	cytosol	14.98	3.38	0.98	cytosol	20.87	4.64	1.37	cytosol	Protein of unconfirmed function, involved in pyridoxine metabolism; expression is induced during stationary phase; forms a putative glutamine amidotransferase complex with Snz1p, with Sno1p serving as the glutaminase
YCR026C	NPP1	14.68	4.55877	below threshold	14.9222	4.72417	below threshold	14.4406	4.30169	below threshold	15.08	5.6	1.02	cytosol	15.63	3.68	1.06	cytosol	17.22	4.61	1.17	cytosol	Nucleotide pyrophosphatase/phosphodiesterase family member; mediates extracellular nucleotide phosphate hydrolysis along with Npp2p and Pho5p; activity and expression enhanced during conditions of phosphate starvation
YBR217W	ATG12	15.78	4.09597	below threshold	14.9288	4.04627	below threshold	16.6404	4.0388	below threshold	15.97	5.62	1.01	cytosol	15.92	4.08	1	cytosol	15.61	4.28	0.98	cytosol	Conserved ubiquitin-like modifier involved in autophagy and the Cvt pathway; conjugated to Atg5p to form a complex involved in Atg8p lipidation; Atg12p-Atg5p also forms a complex with Atg16p that is required for autophagosome formation
YJL091C	GWT1	14.05	4.67102	below threshold	14.9295	4.85293	below threshold	13.2059	4.46614	below threshold	14.42	5.59	1.02	cytosol	13.4	2.41	0.95	cytosol	14.59	5.66	1.03	cytosol	Protein involved in the inositol acylation of glucosaminyl phosphatidylinositol (GlcN-PI) to form glucosaminyl(acyl)phosphatidylinositol (GlcN(acyl)PI), an intermediate in the biosynthesis of glycosylphosphatidylinositol (GPI) anchors
YBR183W	YPC1	14.1	3.29365	below threshold	14.9362	3.33866	below threshold	13.273	3.01512	below threshold	13.17	4.01	0.93	cytosol	15.16	2.81	1.07	cytosol	14.57	2.97	1.03	cytosol	Alkaline ceramidase that also has reverse (CoA-independent) ceramide synthase activity, catalyzes both breakdown and synthesis of phytoceramide; overexpression confers fumonisin B1 resistance
YDR402C	DIT2	15.55	4.09427	below threshold	14.9377	4.03363	below threshold	16.1752	4.11961	below threshold	17.3	6.12	1.11	cytosol	14.87	2.3	0.95	cytosol	13.62	3.13	0.87	cytosol	N-formyltyrosine oxidase, sporulation-specific microsomal enzyme involved in the production of N,N-bisformyl dityrosine required for spore wall maturation, homologous to cytochrome P-450s
YGR182C	YGR182C	15.11	3.83304	below threshold	14.9388	4.07726	below threshold	15.3024	3.67503	below threshold	15.51	5.96	1.02	cytosol	17.94	3.89	1.18	cytosol	18.69	8.23	1.23	cytosol	Dubious open reading frame unlikely to encode a protein, based on available experimental and comparative sequence data; partially overlaps the verified ORF TIM13/YGR181W
YML093W	UTP14	14.21	4.08126	below threshold	14.9535	4.25372	below threshold	13.4845	3.60317	below threshold	16.77	5.87	1.17	cytosol	14.87	4.44	1.04	cytosol	15.91	7.03	1.11	cytosol	Subunit of U3-containing Small Subunit (SSU) processome complex involved in production of 18S rRNA and assembly of small ribosomal subunit
YHR113W	YHR113W	15.82	3.84724	below threshold	14.9536	3.88368	below threshold	16.7065	3.66966	below threshold	17.02	6.67	1.07	cytosol	16.52	3.84	1.04	cytosol	16.41	3.85	1.03	cytosol	Cytoplasmic aspartyl aminopeptidase; cleaves unblocked N-terminal acidic amino acid residues from peptide substrates; forms a 12 subunit homo-oligomeric complex; M18 metalloprotease family member; may interact with ribosomes
YHR190W	ERG9	14.42	4.12823	below threshold	14.9636	4.40437	below threshold	13.8955	3.68229	below threshold	14.11	4.92	0.97	cytosol	15.25	2.77	1.05	cytosol	17.81	5.92	1.23	cytosol	Farnesyl-diphosphate farnesyl transferase (squalene synthase), joins two farnesyl pyrophosphate moieties to form squalene in the sterol biosynthesis pathway
YAR031W	PRM9	14.22	3.95378	below threshold	14.9677	3.84471	below threshold	13.4876	3.94657	below threshold	13.24	5.79	0.93	cytosol	14.98	3.22	1.05	cytosol	14.63	2.77	1.02	cytosol	Pheromone-regulated protein with 3 predicted transmembrane segments and an FF sequence, a motif involved in COPII binding; member of DUP240 gene family
YDR094W	YDR094W	15.45	3.68036	below threshold	14.9693	3.85125	below threshold	15.9403	3.48915	below threshold	16.25	5.96	1.05	cytosol	15.76	4.47	1.01	cytosol	16.93	5.5	1.09	cytosol	Dubious open reading frame unlikely to encode a protein, based on available experimental and comparative sequence data; partially overlaps verified ORF DNF2
YNL029C	KTR5	15.41	4.36412	below threshold	14.9713	4.79506	below threshold	15.8553	3.7281	below threshold	14.67	5.01	0.95	cytosol	15.5	2.79	1	cytosol	17.2	5.21	1.11	cytosol	Putative mannosyltransferase involved in protein glycosylation; member of the KRE2/MNT1 mannosyltransferase family
YLL064C	PAU18	16.13	3.39344	below threshold	14.9783	3.4512	below threshold	17.3045	3.16888	below threshold	17.42	6.57	1.07	cytosol	16.68	3.3	1.03	cytosol	15.51	4.09	0.96	cytosol	Protein of unknown function, member of the seripauperin multigene family encoded mainly in subtelomeric regions; identical to Pau6p
YLR373C	VID22	15.26	4.65499	below threshold	14.9787	4.85397	below threshold	15.56	4.46485	below threshold	14.19	7.16	0.92	cytosol	17.28	4.34	1.13	cytosol	15.82	6.22	1.03	cytosol	Glycosylated integral membrane protein localized to the plasma membrane; plays a role in fructose-1,6-bisphosphatase (FBPase) degradation; involved in FBPase transport from the cytosol to Vid (vacuole import and degradation) vesicles
YDR245W	MNN10	14.07	4.42908	below threshold	14.9857	4.7648	below threshold	13.1702	3.79289	below threshold	14.64	4.71	1.04	cytosol	15.32	2.79	1.08	cytosol	17.55	6.51	1.24	cytosol	Subunit of a Golgi mannosyltransferase complex also containing Anp1p, Mnn9p, Mnn11p, and Hoc1p that mediates elongation of the polysaccharide mannan backbone; membrane protein of the mannosyltransferase family
YLR116W	MSL5	14.69	3.47718	below threshold	14.9871	3.05	below threshold	14.4161	4.15328	below threshold	18.42	6.22	1.25	cytosol	16.4	4.03	1.11	cytosol	15.06	3.85	1.02	cytosol	Component of the commitment complex, which defines the first step in the splicing pathway; essential protein that interacts with Mud2p and Prp40p, forming a bridge between the intron ends; also involved in nuclear retention of pre-mRNA
YDR016C	DAD1	15.28	3.84035	below threshold	14.9891	3.64989	below threshold	15.5856	4.23848	below threshold	11.87	4.56	0.77	cytosol	16.72	3.04	1.09	cytosol	15.97	4	1.04	cytosol	Essential subunit of the Dam1 complex (aka DASH complex), couples kinetochores to the force produced by MT depolymerization thereby aiding in chromosome segregation; is transferred to the kinetochore prior to mitosis
YOR135C	IRC14	15.33	3.90101	below threshold	14.9922	3.90761	below threshold	15.6766	3.87085	below threshold	17.15	5.6	1.11	cytosol	17.89	3.81	1.16	cytosol	15.8	5.33	1.03	cytosol	Dubious open reading frame unlikely to encode a protein, based on available experimental and comparative sequence data; partially overlaps the verified gene YOR136W; null mutant displays increased levels of spontaneous Rad52 foci
YNL067W-A	YNL067W-A	15.84	4.30641	below threshold	14.9948	4.52094	below threshold	16.7014	3.95205	below threshold	16.58	6.25	1.04	cytosol	16.91	3.41	1.06	cytosol	16.23	4.52	1.02	cytosol	Dubious open reading frame unlikely to encode a protein, based on available experimental and comparative sequence data
YOL150C	YOL150C	14.9	3.82587	below threshold	15.0024	4.11484	below threshold	14.8084	3.46438	below threshold	17.04	5.21	1.14	cytosol	16.69	2.93	1.12	cytosol	18.8	9.1	1.26	cytosol	Dubious open reading frame unlikely to encode a functional protein, based on available experimental and comparative sequence data
YIL058W	YIL058W	14.61	3.47746	below threshold	15.0095	3.4085	below threshold	14.2391	3.50293	below threshold	17.34	5.94	1.18	cytosol	16.01	2.99	1.09	cytosol	17.36	6.8	1.18	cytosol	Dubious open reading frame unlikely to encode a functional protein, based on available experimental and comparative sequence data
YGL258W	VEL1	16.82	3.73568	below threshold	15.0181	3.02544	below threshold	18.6547	3.76201	below threshold	16.83	7	0.99	cytosol	14.94	2.38	0.88	cytosol	15.58	3.23	0.92	cytosol	Protein of unknown function; highly induced in zinc-depleted conditions and has increased expression in NAP1 deletion mutants
YAL044W-A	YAL044W-A	15.36	4.2038	below threshold	15.0209	4.67501	below threshold	15.7064	3.32043	below threshold	18.19	6.17	1.18	cytosol	15.91	3.61	1.03	cytosol	18.43	8.08	1.2	cytosol	Putative protein of unknown function; similar to S. pombe uvi31 which is a putative DNA repair protein
YDL247W-A	YDL247W-A	15.04	4.20763	below threshold	15.0243	4.2465	below threshold	15.0737	4.17339	below threshold	17.87	6.5	1.18	cytosol	16.89	3.08	1.12	cytosol	15.66	5.96	1.04	cytosol	Dubious open reading frame unlikely to encode a protein, based on available experimental and comparative sequence data; identified by sequence comparison with hemiascomycetous yeast species
YNL203C	YNL203C	15.6	3.78934	below threshold	15.0308	3.80755	below threshold	16.1864	3.59326	below threshold	16.86	6.89	1.08	cytosol	14.53	2.5	0.93	cytosol	23.54	4.81	1.5	cytosol	Dubious open reading frame unlikely to encode a functional protein, based on available experimental and comparative sequence data
YBL024W	NCL1	15.26	3.04713	below threshold	15.0314	3.31983	below threshold	15.4928	3.0093	below threshold	16.55	6.44	1.08	cytosol	20.18	3.75	1.32	cytosol	15.38	3.19	1	cytosol	S-adenosyl-L-methionine-dependent tRNA: m5C-methyltransferase, methylates cytosine to m5C at several positions in tRNAs and intron-containing pre-tRNAs; similar to Nop2p and human proliferation associated nucleolar protein p120
YOL002C	IZH2	14.13	3.91801	below threshold	15.0315	4.00672	below threshold	13.2427	3.74054	below threshold	14.03	3.91	0.99	cytosol	15.24	2.6	1.07	cytosol	14.58	5.3	1.03	cytosol	Plasma membrane protein involved in zinc homeostasis and osmotin-induced apoptosis; transcription regulated by Zap1p, zinc and fatty acid levels; similar to mammalian adiponectins; deletion increases sensitivity to elevated zinc
YIL149C	MLP2	14.58	4.15681	below threshold	15.0317	4.02272	below threshold	14.1461	4.23136	below threshold	15.25	5.1	1.04	cytosol	16.43	3.53	1.12	cytosol	16.57	4.08	1.13	cytosol	Myosin-like protein associated with the nuclear envelope, connects the nuclear pore complex with the nuclear interior; involved in the Tel1p pathway that controls telomere length
YLR173W	YLR173W	13.96	3.70721	below threshold	15.0517	2.6684	below threshold	12.8751	3.87984	below threshold	17.19	5.65	1.23	cytosol	14.19	2.88	1.01	cytosol	19.87	7	1.42	cytosol	Putative protein of unknown function
YEL039C	CYC7	15.14	3.89202	below threshold	15.0517	4.19376	below threshold	15.236	3.4808	below threshold	15.37	5.24	1.01	cytosol	13.31	2.53	0.87	cytosol	16.25	6.92	1.07	cytosol	Cytochrome c isoform 2, expressed under hypoxic conditions; electron carrier of the mitochondrial intermembrane space that transfers electrons from ubiquinone-cytochrome c oxidoreductase to cytochrome c oxidase during cellular respiration
YPR012W	YPR012W	14.6	4.29565	below threshold	15.0521	4.37188	below threshold	14.1606	4.16725	below threshold	16.78	5.9	1.14	cytosol	17.25	4.01	1.18	cytosol	17.01	6.26	1.16	cytosol	Dubious open reading frame unlikely to encode a protein, based on available experimental and comparative sequence data; YPR012W is not an essential gene
YBR138C	YBR138C	15.43	3.67331	below threshold	15.0561	3.76312	below threshold	15.8143	3.52708	below threshold	17.05	6.91	1.1	cytosol	15.93	3.46	1.03	cytosol	13.6	2.77	0.88	cytosol	Cytoplasmic protein of unknown function, potentially phosphorylated by Cdc28p; YBR138C is not an essential gene
YOL024W	YOL024W	15.93	3.58577	below threshold	15.058	3.80362	below threshold	16.8168	3.29396	below threshold	15.54	6.25	0.97	cytosol	15.13	3.52	0.94	cytosol	15.46	5.76	0.97	cytosol	Putative protein of unknown function; predicted to have thiol-disulfide oxidoreductase active site
YKL053C-A	MDM35	14.81	4.26609	below threshold	15.0583	5.05172	below threshold	14.5711	3.76231	below threshold	16.66	6.13	1.12	cytosol	17.37	3.41	1.17	cytosol	15.06	5.17	1.01	cytosol	Mitochondrial intermembrane space protein; mutation affects mitochondrial distribution and morphology; contains twin cysteine-x9-cysteine motifs
YIR025W	MND2	15.38	3.55539	below threshold	15.0603	3.65128	below threshold	15.713	3.33936	below threshold	17.45	5.33	1.13	cytosol	19.35	3.8	1.25	cytosol	22.64	4.5	1.47	cytosol	Subunit of the anaphase-promoting complex (APC); necessary for maintaining sister chromatid cohesion in prophase I of meiosis by inhibiting premature ubiquitination and subsequent degradation of substrates by the APC(Ama1) ubiquitin ligase
YFL051C	YFL051C	15.85	3.41209	below threshold	15.061	2.71195	below threshold	16.6471	3.50248	below threshold	15.85	5.35	1	cytosol	16.24	3.58	1.02	cytosol	18.53	8.66	1.16	cytosol	Putative protein of unknown function; YFL051C is not an essential gene
YOR068C	VAM10	15.68	3.78959	below threshold	15.0626	4.26547	below threshold	16.301	3.31109	below threshold	15.85	5.98	1.01	cytosol	18.68	3.75	1.19	cytosol	16.53	2.99	1.05	cytosol	Protein involved in vacuole morphogenesis; acts at an early step of homotypic vacuole fusion that is required for vacuole tethering
YFL010W-A	AUA1	15.09	4.04033	below threshold	15.0635	3.78391	below threshold	15.1354	4.19388	below threshold	17.83	5.8	1.18	cytosol	16	3.38	1.05	cytosol	15.04	6.1	0.99	cytosol	Protein required for the negative regulation by ammonia of Gap1p, which is a general amino acid permease
YCR088W	ABP1	14.46	3.55882	below threshold	15.0659	3.74395	below threshold	13.8667	3.35229	below threshold	16.59	5.53	1.14	cytosol	16.05	3.2	1.11	cytosol	20.11	4.99	1.39	cytosol	Actin-binding protein of the cortical actin cytoskeleton, important for activation of the Arp2/3 complex that plays a key role actin in cytoskeleton organization
YLR171W	YLR171W	15.18	3.35609	below threshold	15.0679	3.27943	below threshold	15.3045	3.3747	below threshold	16.42	5.3	1.08	cytosol	14.81	2.18	0.97	cytosol	16.83	6	1.1	cytosol	Dubious open reading frame unlikely to encode a functional protein, based on available experimental and comparative sequence data
YBR223C	TDP1	14.6	3.18596	below threshold	15.0761	3.04954	below threshold	14.1461	3.23102	below threshold	19.48	8.73	1.33	cytosol	14.26	3.31	0.97	cytosol	18.26	4.75	1.24	cytosol	Tyrosyl-DNA Phosphodiesterase I, hydrolyzes 3' and 5'-phosphotyrosyl bonds, involved in the repair of DNA lesions created by topoisomerase I and topoisomerase II; mutations in human homolog result in the neurodegenerative disease SCANI
YBR116C	YBR116C	16.23	4.04927	below threshold	15.0813	3.98925	below threshold	17.3834	3.85944	below threshold	14.88	5.24	0.91	cytosol	15.84	3.17	0.97	cytosol	18.32	3.94	1.12	cytosol	Dubious open reading frame unlikely to encode a protein, based on available experimental and comparative sequence data; partially overlaps the verified gene TKL2
YNL285W	YNL285W	15.18	3.59133	below threshold	15.0837	3.15978	below threshold	15.2824	3.90023	below threshold	18.08	5.56	1.19	cytosol	17.61	3.66	1.15	cytosol	16.27	6.09	1.07	cytosol	Dubious open reading frame unlikely to encode a functional protein, based on available experimental and comparative sequence data
YHR130C	YHR130C	14.87	3.51266	below threshold	15.0838	3.58165	below threshold	14.673	3.4453	below threshold	15.04	5.9	1.01	cytosol	16.32	3.88	1.09	cytosol	15.59	5.94	1.04	cytosol	Dubious open reading frame unlikely to encode a functional protein, based on available experimental and comparative sequence data
YHR109W	CTM1	15.08	3.37221	below threshold	15.0921	3.6851	below threshold	15.0845	2.73814	below threshold	17.13	5.92	1.13	cytosol	15.28	3.44	1.01	cytosol	16.36	4.76	1.08	cytosol	Cytochrome c lysine methyltransferase, trimethylates residue 72 of apo-cytochrome c (Cyc1p) in the cytosol; not required for normal respiratory growth
YIR028W	DAL4	15.54	3.68926	below threshold	15.0922	3.89772	below threshold	16.0002	3.61055	below threshold	15.2	4.67	0.97	cytosol	16.97	4.36	1.09	cytosol	69.33	26.78	4.46	vacuole	Allantoin permease; expression sensitive to nitrogen catabolite repression and induced by allophanate, an intermediate in allantoin degradation
YCR097W-A	YCR097W-A	15.02	3.90647	below threshold	15.0924	3.58142	below threshold	14.9692	4.24196	below threshold	16.09	4.91	1.07	cytosol	17.33	3.4	1.15	cytosol	15.7	6.65	1.04	cytosol	Dubious open reading frame unlikely to encode a protein, based on available experimental and comparative sequence data; identified by homology to a hemiascomycetous yeast protein
YCL023C	YCL023C	14.68	4.29434	below threshold	15.0962	4.66091	below threshold	14.2798	3.85916	below threshold	16.51	5.86	1.12	cytosol	18.06	4.24	1.22	cytosol	16.5	6.94	1.12	cytosol	Dubious open reading frame unlikely to encode a protein, based on available experimental and comparative sequence data; partially overlaps verified ORF KCC4
YMR212C	EFR3	15.66	3.96334	below threshold	15.0965	4.05557	below threshold	16.247	3.86817	below threshold	14.79	5.22	0.94	cytosol	16.88	3.44	1.07	cytosol	14.65	4.23	0.93	cytosol	Non-essential protein of unknown function; exhibits synthetic lethal genetic interactions with PHO85; the authentic, non-tagged protein is detected in highly purified mitochondria in high-throughput studies and is phosphorylated
YOR266W	PNT1	14.78	3.45384	below threshold	15.0982	4.58376	below threshold	14.4824	3.06454	below threshold	14.56	4.88	0.98	cytosol	13.53	2.68	0.91	cytosol	14.32	3.74	0.96	cytosol	Mitochondrial integral inner membrane protein involved in membrane insertion of C-terminus of Cox2p, interacts genetically and physically with Cox18p; deletion mutant sensitive to the anti-Pneumocystis carinii drug pentamidine
YOR105W	YOR105W	14.96	3.91619	below threshold	15.1111	4.04261	below threshold	14.8243	3.76326	below threshold	17.27	7.08	1.15	cytosol	15.73	3.47	1.05	cytosol	16.88	4.46	1.12	cytosol	Dubious open reading frame unlikely to encode a functional protein, based on available experimental and comparative sequence data
YJL052C-A	YJL052C-A	15.34	3.47282	below threshold	15.1126	3.50648	below threshold	15.5806	3.42041	below threshold	16.36	6.17	1.06	cytosol	16.73	3.47	1.09	cytosol	15.63	4.88	1.01	cytosol	Putative protein of unknown function, identified based on comparison to related yeast species
YGR096W	TPC1	14.91	3.96481	below threshold	15.1187	4.12579	below threshold	14.7192	3.76335	below threshold	13.27	4.48	0.88	cytosol	13.59	2.97	0.91	cytosol	13.94	4.03	0.93	cytosol	Mitochondrial membrane transporter that mediates uptake of the essential cofactor thiamine pyrophosphate (ThPP) into mitochondria; expression appears to be regulated by carbon source; member of the mitochondrial carrier family
YFL048C	EMP47	14.28	4.43454	below threshold	15.1203	4.9054	below threshold	13.4528	3.74679	below threshold	14.34	4.88	1	cytosol	14.79	2.36	1.03	cytosol	14.5	3.52	1.01	cytosol	Integral membrane component of endoplasmic reticulum-derived COPII-coated vesicles, which function in ER to Golgi transport
YGL158W	RCK1	16.27	3.54635	below threshold	15.1305	3.69863	below threshold	17.4194	2.95475	below threshold	19.35	5.88	1.18	cytosol	17.28	2.77	1.06	cytosol	14.47	2.62	0.88	cytosol	Protein kinase involved in the response to oxidative stress; identified as suppressor of S. pombe cell cycle checkpoint mutations
YPR146C	YPR146C	16.43	4.77987	below threshold	15.1321	4.78837	below threshold	17.7383	4.54916	below threshold	22.37	9.85	1.36	cytosol	18.08	4.35	1.1	cytosol	16.64	5.79	1.01	cytosol	Dubious open reading frame unlikely to encode a functional protein, based on available experimental and comparative sequence data
YHR008C	SOD2	17.21	4.46158	below threshold	15.1324	3.42582	below threshold	19.3096	4.93008	cytosol	17.45	9.76	1.01	cytosol	13.6	2.11	0.79	cytosol	17.22	3.36	0.99	cytosol	Mitochondrial superoxide dismutase, protects cells against oxygen toxicity; phosphorylated
YMR052W	FAR3	17.34	4.16088	below threshold	15.133	3.43859	below threshold	19.5517	4.1237	cytosol	16.7	6.59	0.96	cytosol	13.76	2.65	0.79	cytosol	16.61	3.09	0.95	cytosol	Protein involved in recovery from cell cycle arrest in response to pheromone, in a Far1p-independent pathway; interacts with Far7p, Far8p, Far9p, Far10p, and Far11p; localizes to the endoplasmic reticulum
YDR078C	SHU2	16.04	3.95751	below threshold	15.1355	4.55521	below threshold	16.96	3.22033	below threshold	18.01	5.97	1.12	cytosol	14.58	3.23	0.9	cytosol	18.46	3.87	1.15	cytosol	Protein involved in a Rad51p-, Rad54p-dependent pathway for homologous recombination repair, important for error-free repair of spontaneous and induced DNA lesions to protect the genome from mutation; associates with Shu1p, Psy3p, and Csm2p
YDL093W	PMT5	15.52	3.77969	below threshold	15.1385	3.73512	below threshold	15.9214	3.84934	below threshold	14.96	6.27	0.96	cytosol	15.01	3.61	0.96	cytosol	15.63	4.87	1	cytosol	Protein O-mannosyltransferase, transfers mannose residues from dolichyl phosphate-D-mannose to protein serine/threonine residues; acts in a complex with Pmt3p, can instead interact with Pmt2p in some conditions; target for new antifungals
YLR271W	YLR271W	14.55	3.8348	below threshold	15.1405	4.10176	below threshold	13.9764	3.39882	below threshold	18.21	5.94	1.25	cytosol	16.54	3.01	1.13	cytosol	16.7	5.38	1.14	cytosol	Putative protein of unknown function; green fluorescent protein (GFP)-fusion protein localizes to the cytoplasm and the nucleus and is induced in response to the DNA-damaging agent MMS
YFR018C	YFR018C	15.52	4.10727	below threshold	15.1434	3.88877	below threshold	15.9006	4.25598	below threshold	18	5.74	1.15	cytosol	20.71	3.66	1.33	cytosol	26.54	4.73	1.71	cytosol	Putative protein of unknown function
YCR050C	YCR050C	15.44	4.0488	below threshold	15.1457	3.87137	below threshold	15.7477	4.25142	below threshold	16.65	5.23	1.07	cytosol	16.41	4.15	1.06	cytosol	17.31	3.86	1.12	cytosol	Non-essential protein of unknown function; deletion mutant is synthetically sick or lethal with alpha-synuclein
YNL157W	IGO1	16.22	3.39606	below threshold	15.1485	2.8165	below threshold	17.3011	3.38838	below threshold	15.52	5.45	0.95	cytosol	15.7	2.92	0.96	cytosol	18.08	7.51	1.11	cytosol	Putative protein of unknown function; green fluorescent protein (GFP)-fusion protein localizes to the cytoplasm and nucleus
YJL139C	YUR1	14.28	4.40468	below threshold	15.1633	4.68673	below threshold	13.4084	3.15133	below threshold	14.14	4.99	0.99	cytosol	14.11	2.83	0.98	cytosol	15.82	5.07	1.1	cytosol	Mannosyltransferase of the KTR1 family, involved in protein N-glycosylation; located in the Golgi apparatus
YOR211C	MGM1	14.75	4.74736	below threshold	15.1642	4.37186	below threshold	14.3547	4.97533	below threshold	14.48	4.85	0.98	cytosol	15.94	2.93	1.08	cytosol	17.24	6.08	1.16	cytosol	Mitochondrial GTPase related to dynamin, present in a complex containing Ugo1p and Fzo1p; required for normal morphology of cristae and for stability of Tim11p; homolog of human OPA1 involved in autosomal dominant optic atrophy
YOR097C	YOR097C	16.05	4.27486	below threshold	15.1661	4.16329	below threshold	16.9439	4.15597	below threshold	17.39	6.03	1.08	cytosol	18.32	4.73	1.14	cytosol	18.06	8.37	1.12	cytosol	Putative protein of unknown function; identified as interacting with Hsp82p in a high-throughput two-hybrid screen; YOR097C is not an essential gene
YLR349W	YLR349W	15.85	3.7629	below threshold	15.1675	3.97832	below threshold	16.5538	3.26435	below threshold	14.91	4.92	0.94	cytosol	15.52	2.8	0.97	cytosol	17.7	3.12	1.11	cytosol	Dubious open reading frame unlikely to encode a protein, based on available experimental and comparative sequence data; overlaps the verified ORF DIC1/YLR348C
YDR533C	HSP31	16.16	4.16207	below threshold	15.1742	4.19457	below threshold	17.1607	3.64459	below threshold	19.26	6.29	1.19	cytosol	15.02	3.26	0.92	cytosol	16.46	4.59	1.01	cytosol	Possible chaperone and cysteine protease with similarity to E. coli Hsp31; member of the DJ-1/ThiJ/PfpI superfamily, which includes human DJ-1 involved in Parkinson's disease; exists as a dimer and contains a putative metal-binding site
YJL127C	SPT10	15.13	3.48048	below threshold	15.1786	4.15587	below threshold	15.0938	3.14377	below threshold	16.65	7.49	1.1	cytosol	18.19	3.35	1.2	cytosol	17.44	8.35	1.15	cytosol	Putative histone acetylase, sequence-specific activator of histone genes, binds specifically and highly cooperatively to pairs of UAS elements in core histone promoters, functions at or near the TATA box
YCL073C	YCL073C	15.9	4.43779	below threshold	15.1846	4.39333	below threshold	16.631	4.41399	below threshold	14.07	4.71	0.88	cytosol	16.48	3.79	1.03	cytosol	14.84	4.47	0.93	cytosol	Protein of unconfirmed function; displays a topology characteristic of the Major Facilitators Superfamily of membrane proteins; coding sequence 98% identical to that of YKR106W
YOR306C	MCH5	15.79	5.0164	below threshold	15.1891	5.00805	below threshold	16.4116	4.98303	below threshold	19.47	5.81	1.23	cytosol	16.78	3.22	1.06	cytosol	18.72	4.33	1.18	cytosol	Plasma membrane riboflavin transporter; facilitates the uptake of vitamin B2; required for FAD-dependent processes; sequence similarity to mammalian monocarboxylate permeases, however mutants are not deficient in monocarboxylate transport
YER007W	PAC2	16.46	3.06163	below threshold	15.1929	2.27541	below threshold	17.7359	3.60908	below threshold	16.94	6.39	1.02	cytosol	13.71	2.8	0.83	cytosol	13.56	2.06	0.82	cytosol	Microtubule effector required for tubulin heterodimer formation, binds alpha-tubulin, required for normal microtubule function, null mutant exhibits cold-sensitive microtubules and sensitivity to benomyl
YER121W	YER121W	15.99	4.0186	below threshold	15.1936	3.90248	below threshold	16.8007	3.92727	below threshold	15.8	6.53	0.98	cytosol	15.92	3.62	0.99	cytosol	15.93	4.07	0.99	cytosol	Putative protein of unknown function; may be involved in phosphatase regulation and/or generation of precursor metabolites and energy
YHR152W	SPO12	16.53	3.48563	below threshold	15.1966	3.45012	below threshold	17.8875	3.07937	below threshold	15.64	5.74	0.94	cytosol	16.84	3.36	1.01	cytosol	17.51	6.45	1.05	cytosol	Nucleolar protein of unknown function, positive regulator of mitotic exit; involved in regulating release of Cdc14p from the nucleolus in early anaphase, may play similar role in meiosis
YOL104C	NDJ1	15.17	3.91027	below threshold	15.2069	3.53124	below threshold	15.1548	4.08027	below threshold	18.08	5.79	1.19	cytosol	19.89	4.25	1.31	cytosol	24.01	5.73	1.58	cytosol	Meiosis-specific telomere protein, required for bouquet formation, effective homolog pairing, ordered cross-over distribution, sister chromatid cohesion at meiotic telomeres, chromosomal segregation and telomere-led rapid prophase movement
YBR068C	BAP2	14.64	3.96033	below threshold	15.2075	4.29741	below threshold	14.1071	3.71526	below threshold	15.25	4.94	1.04	cytosol	15.35	2.83	1.04	cytosol	18.45	7.7	1.25	cytosol	High-affinity leucine permease, functions as a branched-chain amino acid permease involved in the uptake of leucine, isoleucine and valine; contains 12 predicted transmembrane domains
YKL001C	MET14	16.99	5.33623	below threshold	15.2109	5.13881	below threshold	18.7865	5.15169	below threshold	21.15	11.53	1.24	cytosol	19.19	5.2	1.12	cytosol	220.81	54.35	12.99	nucleus	Adenylylsulfate kinase, required for sulfate assimilation and involved in methionine metabolism
YFL031W	HAC1	16.43	3.43038	below threshold	15.2148	3.34096	below threshold	17.6636	3.02054	below threshold	14.03	4.19	0.85	cytosol	15.41	3.45	0.93	cytosol	13.97	2.94	0.84	cytosol	Basic leucine zipper (bZIP) transcription factor (ATF/CREB1 homolog) that regulates the unfolded protein response, via UPRE binding, and membrane biogenesis; ER stress-induced splicing pathway facilitates efficient Hac1p synthesis
YML019W	OST6	14.23	4.16038	below threshold	15.2164	4.54863	below threshold	13.259	3.35322	below threshold	14.74	5.02	1.03	cytosol	15.32	3.17	1.07	cytosol	17.72	6.51	1.24	cytosol	Subunit of the oligosaccharyltransferase complex of the ER lumen, which catalyzes asparagine-linked glycosylation of newly synthesized proteins; similar to and partially functionally redundant with Ost3p
YOR359W	VTS1	16.19	3.41025	below threshold	15.2228	3.17853	below threshold	17.1777	3.55486	below threshold	17.13	6.9	1.05	cytosol	13.9	2.86	0.85	cytosol	13.05	2.56	0.8	cytosol	Post-transcriptional gene regulator, flap-structured DNA-binding and RNA-binding protein; shows genetic interactions with Vti1p, a v-SNARE involved in cis-Golgi membrane traffic; stimulates Dna2p endonuclease activity; contains a SAM domain
YDL029W	ARP2	14.95	3.79124	below threshold	15.2248	4.51366	below threshold	14.6809	2.9302	below threshold	18.32	24.53	1.22	cytosol	16.85	2.95	1.12	cytosol	17.05	8.46	1.14	cytosol	Essential component of the Arp2/3 complex, which is a highly conserved actin nucleation center required for the motility and integrity of actin patches; involved in endocytosis and membrane growth and polarity
YHR087W	RTC3	15.49	3.58446	below threshold	15.225	4.00811	below threshold	15.7665	3.33042	below threshold	15.93	5.09	1.02	cytosol	17.06	4.35	1.1	cytosol	17.23	7	1.11	cytosol	Protein of unknown function involved in RNA metabolism; has structural similarity to SBDS, the human protein mutated in Shwachman-Diamond Syndrome (the yeast SBDS ortholog = SDO1); null mutation suppresses cdc13-1 temperature sensitivity
YOR175C	ALE1	15.9	4.15852	below threshold	15.2342	4.65539	below threshold	16.5875	3.60385	below threshold	15.58	4.83	0.97	cytosol	15.52	2.8	0.97	cytosol	17.16	6.1	1.07	cytosol	Broad-specificity lysophospholipid acyltransferase, part of MBOAT family of membrane-bound O-acyltransferases; key component of Lands cycle; may have role in fatty acid exchange at sn-2 position of mature glycerophospholipids
YLR145W	RMP1	17.77	4.77606	nucleus	15.2402	4.40831	nucleus	20.3086	3.99174	nucleus	17.51	5.52	0.98	nucleus	19.71	4.32	1.1	nucleus	20.54	4.65	1.15	nucleus	Subunit of RNase MRP, which processes pre-rRNA and has a role in cell cycle-regulated degradation of daughter cell-specific mRNAs; unlike most subunits, not shared between RNase MRP and nuclear RNase P
YMR088C	VBA1	15.31	3.58496	below threshold	15.2447	4.33858	below threshold	15.3997	3.09103	below threshold	15.42	5.11	1	cytosol	15.33	3.21	1	cytosol	16.61	6.53	1.08	cytosol	Permease of basic amino acids in the vacuolar membrane
YMR217W	GUA1	17.3	5.28163	below threshold	15.2483	3.4368	below threshold	19.3605	5.46935	cytosol	17.78	6.63	1.02	cytosol	15.93	3.86	0.92	cytosol	13.22	2.29	0.76	cytosol	GMP synthase, an enzyme that catalyzes the second step in the biosynthesis of GMP from inosine 5'-phosphate (IMP); transcription is not subject to regulation by guanine but is negatively regulated by nutrient starvation
YOL124C	TRM11	15.68	3.70255	below threshold	15.2487	3.91702	below threshold	16.133	3.34933	below threshold	15.74	6.27	1	cytosol	15.93	3.12	1.01	cytosol	14.15	7.27	0.9	cytosol	Catalytic subunit of an adoMet-dependent tRNA methyltransferase complex (Trm11p-Trm112p), required for the methylation of the guanosine nucleotide at position 10 (m2G10) in tRNAs; contains a THUMP domain and a methyltransferase domain
YAL034C	FUN19	16.39	3.98106	below threshold	15.25	3.19025	below threshold	17.5596	4.09125	below threshold	19.79	8.63	1.2	cytosol	17.97	3.44	1.09	cytosol	26.04	5.27	1.58	nucleus	Non-essential protein of unknown function; expression induced in response to heat stress
YHR214W-A	YHR214W-A	16.3	2.86228	below threshold	15.2574	2.74202	below threshold	17.36	2.69445	below threshold	15.12	5.6	0.92	cytosol	15.08	3.04	0.92	cytosol	15.44	3.67	0.94	cytosol	Dubious open reading frame unlikely to encode a protein, based on experimental and comparative sequence data; similar to the fungal specific protein encoded by YAR068W; induced by zinc deficiency
YJL170C	ASG7	16.09	3.50085	below threshold	15.258	3.62564	below threshold	16.9405	3.31627	below threshold	15.26	5.37	0.94	cytosol	15.29	2.75	0.95	cytosol	14.53	3.54	0.9	cytosol	Protein that regulates signaling from a G protein beta subunit Ste4p and its relocalization within the cell; specific to a-cells and induced by alpha-factor
YER082C	UTP7	15.02	3.49261	below threshold	15.2591	2.99925	below threshold	14.7989	3.8472	below threshold	16.96	6.42	1.12	cytosol	14.13	3.01	0.94	cytosol	17.55	5.67	1.16	cytosol	Nucleolar protein, component of the small subunit (SSU) processome containing the U3 snoRNA that is involved in processing of pre-18S rRNA
YJR049C	UTR1	14.57	3.27543	below threshold	15.2593	3.176	below threshold	13.8981	3.29451	below threshold	17.54	5.68	1.2	cytosol	16.68	3.19	1.14	cytosol	17.78	2.69	1.21	cytosol	ATP-NADH kinase; phosphorylates both NAD and NADH; active as a hexamer; enhances the activity of ferric reductase (Fre1p)
YDL004W	ATP16	15.15	3.79298	below threshold	15.2607	4.03233	below threshold	15.0504	3.43517	below threshold	15.01	4.09	0.99	cytosol	13.01	2.74	0.85	cytosol	15.55	4.01	1.02	cytosol	Delta subunit of the central stalk of mitochondrial F1F0 ATP synthase, which is a large, evolutionarily conserved enzyme complex required for ATP synthesis; phosphorylated
YOR202W	HIS3	17.51	3.95659	below threshold	15.2637	3.5974	below threshold	19.7664	3.20083	cytosol	17.81	6.43	1.01	cytosol	14.03	2.38	0.8	cytosol	15.18	3.07	0.86	cytosol	Imidazoleglycerol-phosphate dehydratase, catalyzes the sixth step in histidine biosynthesis; mutations cause histidine auxotrophy and sensitivity to Cu, Co, and Ni salts; transcription is regulated by general amino acid control via Gcn4p
YIL164C	NIT1	16.98	3.87811	below threshold	15.264	3.78264	below threshold	18.7149	3.47082	below threshold	NA	NA	NA	cytosol	NA	NA	NA	cytosol	NA	NA	NA	cytosol	Nitrilase, member of the nitrilase branch of the nitrilase superfamily; in closely related species and other S. cerevisiae strain backgrounds YIL164C and adjacent ORF, YIL165C, likely constitute a single ORF encoding a nitrilase gene
YKL037W	AIM26	15.39	3.90933	below threshold	15.2645	4.02859	below threshold	15.5455	3.74907	below threshold	16.8	5.42	1.09	cytosol	16.77	3.5	1.08	cytosol	15.33	5.52	0.99	cytosol	Putative protein of unknown function; null mutant is viable and displays elevated frequency of mitochondrial genome loss; null mutation confers sensitivity to tunicamycin and DTT
YOL073C	YOL073C	14.81	3.40034	below threshold	15.2666	3.62136	below threshold	14.3742	3.2014	below threshold	14.9	5.65	1	cytosol	14.73	2.95	0.99	cytosol	17.64	6.05	1.19	cytosol	Putative protein of unknown function
YKL058W	TOA2	15.48	3.60781	below threshold	15.2722	3.8524	below threshold	15.6975	3.32412	below threshold	17.15	7.29	1.1	cytosol	16.61	4.54	1.07	cytosol	16.76	4.91	1.08	cytosol	TFIIA small subunit; involved in transcriptional activation, acts as antirepressor or as coactivator; homologous to smallest subunit of human and Drosophila TFIIA
YGR164W	YGR164W	15.68	4.00695	below threshold	15.2769	3.89908	below threshold	16.1042	4.06544	below threshold	16.1	6.25	1.02	cytosol	17.34	4.32	1.1	cytosol	15.88	4.35	1.01	cytosol	Dubious open reading frame unlikely to encode a functional protein, based on available experimental and comparative sequence data
YPL280W	HSP32	15.85	3.5528	below threshold	15.2779	3.76906	below threshold	16.4454	3.247	below threshold	18.76	7.66	1.18	cytosol	15.56	3.09	0.98	cytosol	18.3	5.35	1.15	cytosol	Possible chaperone and cysteine protease with similarity to E. coli Hsp31 and S. cerevisiae Hsp31p, Hsp33p, and Sno4p; member of the DJ-1/ThiJ/PfpI superfamily, which includes human DJ-1 involved in Parkinson's disease
YDR173C	ARG82	15.45	3.74963	below threshold	15.2789	3.60599	below threshold	15.6471	3.89497	below threshold	16.93	6.44	1.09	cytosol	20.87	4.49	1.34	cytosol	20.89	4.92	1.35	cytosol	Inositol polyphosphate multikinase (IPMK), sequentially phosphorylates Ins(1,4,5)P3 to form Ins(1,3,4,5,6)P5; also has diphosphoinositol polyphosphate synthase activity; regulates arginine-, phosphate-, and nitrogen-responsive genes
YKL225W	YKL225W	15.7	3.57012	below threshold	15.2821	3.53636	below threshold	16.1352	3.57353	below threshold	17.25	5.59	1.09	cytosol	16.4	3.44	1.04	cytosol	14.79	3.8	0.94	cytosol	Dubious open reading frame unlikely to encode a functional protein, based on available experimental and comparative sequence data
YKL180W	RPL17A	15.08	3.92494	below threshold	15.2888	4.12906	below threshold	14.8931	3.6892	below threshold	18.06	5.71	1.19	cytosol	17.42	3.98	1.15	cytosol	17.43	4.14	1.15	cytosol	Protein component of the large (60S) ribosomal subunit, nearly identical to Rpl17Bp and has similarity to E. coli L22 and rat L17 ribosomal proteins; copurifies with the Dam1 complex (aka DASH complex)
YOR235W	IRC13	15.51	3.36838	below threshold	15.2966	3.18198	below threshold	15.7382	3.61885	below threshold	19.4	7.56	1.25	cytosol	16.41	3.59	1.05	cytosol	18.75	8.38	1.2	cytosol	Dubious open reading frame unlikely to encode a protein, based on available experimental and comparative sequence data; null mutant displays increased levels of spontaneous Rad52 foci
YLL065W	YLL065W	15.45	3.87525	below threshold	15.2979	4.50992	below threshold	15.6293	3.36413	below threshold	15.94	5.75	1.03	cytosol	17.23	4.33	1.11	cytosol	16.58	7.69	1.07	cytosol	Dubious open reading frame unlikely to encode a protein, based on available experimental and comparative sequence data; overlaps chromosome XII telomeric element core sequences
YHL040C	ARN1	15.27	3.88239	below threshold	15.3007	3.71698	below threshold	15.2542	3.99918	below threshold	14.53	4.58	0.95	cytosol	15.32	3.4	1	cytosol	15.68	4.97	1.02	cytosol	Transporter, member of the ARN family of transporters that specifically recognize siderophore-iron chelates; responsible for uptake of iron bound to ferrirubin, ferrirhodin, and related siderophores
YLR342W	FKS1	15.4	3.55868	below threshold	15.3032	3.68407	below threshold	15.5009	3.42234	below threshold	15.93	5.7	1.03	cytosol	15.34	3.66	0.99	cytosol	16.13	6.36	1.04	cytosol	Catalytic subunit of 1,3-beta-D-glucan synthase, functionally redundant with alternate catalytic subunit Gsc2p; binds to regulatory subunit Rho1p; involved in cell wall synthesis and maintenance; localizes to sites of cell wall remodeling
YMR135W-A	YMR135W-A	16.62	4.31464	below threshold	15.3063	4.16345	below threshold	17.96	4.14706	below threshold	15.93	5.97	0.95	cytosol	18.2	3.79	1.09	cytosol	16.35	5.89	0.98	cytosol	Dubious open reading frame unlikely to encode a functional protein, based on available experimental and comparative sequence data
YIL022W	TIM44	14.53	3.97234	below threshold	15.3145	4.69466	below threshold	13.7527	2.6394	below threshold	15.16	4.65	1.04	cytosol	13.77	2.99	0.94	cytosol	17.96	3.6	1.23	cytosol	Essential component of the Translocase of the Inner Mitochondrial membrane (TIM23 complex); tethers the import motor and regulatory factors (PAM complex) to the translocation channel (Tim23p-Tim17p core complex)
YFL020C	PAU5	15.64	3.67867	below threshold	15.3162	3.58322	below threshold	15.9841	3.71852	below threshold	16.28	5.63	1.04	cytosol	16.76	4.1	1.07	cytosol	17.2	5.66	1.09	cytosol	Member of the seripauperin multigene family encoded mainly in subtelomeric regions; induced during alcoholic fermentation; induced by low temperature and also by anaerobic conditions; negatively regulated by oxygen and repressed by heme
YOR167C	RPS28A	14.6	3.77134	below threshold	15.3194	3.8173	below threshold	13.8953	3.63502	below threshold	16.47	5.4	1.12	cytosol	15.65	3.11	1.07	cytosol	15.84	3.36	1.08	cytosol	Protein component of the small (40S) ribosomal subunit; nearly identical to Rps28Bp and has similarity to rat S28 ribosomal protein
YKL093W	MBR1	14.25	3.06769	below threshold	15.3196	2.44854	below threshold	13.2021	3.29781	below threshold	14.5	4.32	1.01	cytosol	17.14	3.1	1.2	cytosol	18.14	3.01	1.27	cytosol	Protein involved in mitochondrial functions and stress response; overexpression suppresses growth defects of hap2, hap3, and hap4 mutants
YGL010W	YGL010W	14.27	4.35013	below threshold	15.3204	4.33778	below threshold	13.2237	4.21401	below threshold	14.9	5.2	1.04	cytosol	14.22	3.39	0.99	cytosol	17.56	6.53	1.23	cytosol	Putative protein of unknown function; YGL010W is not an essential gene
YGL027C	CWH41	15.94	4.59187	below threshold	15.3229	4.87099	below threshold	16.5795	4.24319	below threshold	15.33	5.51	0.96	cytosol	14.89	3.03	0.93	cytosol	17.13	6.28	1.07	cytosol	Processing alpha glucosidase I, ER type II integral membrane N-glycoprotein involved in assembly of cell wall beta 1,6 glucan and asparagine-linked protein glycosylation; also involved in ER protein quality control and sensing of ER stress
YEL070W	DSF1	16.55	3.93949	below threshold	15.327	3.28353	below threshold	17.7828	4.04388	below threshold	19.34	7.15	1.16	cytosol	15.52	2.93	0.93	cytosol	13.29	2.15	0.8	cytosol	Deletion suppressor of mpt5 mutation
YPL087W	YDC1	14.37	3.70699	below threshold	15.3319	3.75388	below threshold	13.4182	3.45238	below threshold	15.47	4.53	1.07	cytosol	14.09	2.79	0.98	cytosol	19.89	7.32	1.38	cytosol	Alkaline dihydroceramidase, involved in sphingolipid metabolism; preferentially hydrolyzes dihydroceramide to a free fatty acid and dihydrosphingosine; has a minor reverse activity
YDR002W	YRB1	16.6	5.12536	below threshold	15.3387	5.36517	below threshold	17.8814	3.66343	below threshold	13.91	6.11	0.83	cytosol	15.82	3.51	0.95	cytosol	18.53	3.08	1.11	cytosol	Ran GTPase binding protein; involved in nuclear protein import and RNA export, ubiquitin-mediated protein degradation during the cell cycle; shuttles between the nucleus and cytoplasm; is essential; homolog of human RanBP1
YER139C	RTR1	16.05	2.9475	below threshold	15.3387	2.66898	below threshold	16.7816	2.92986	below threshold	17.26	7.15	1.07	cytosol	14.98	2.73	0.93	cytosol	17.23	3.29	1.07	cytosol	CTD phosphatase; dephosphorylates S5-P in the C-terminal domain of Rpo21p; has a cysteine-rich motif required for function and conserved in eukaryotes; shuttles between the nucleus and cytoplasm
YCL069W	VBA3	15.08	4.14495	below threshold	15.3413	4.30169	below threshold	14.8368	3.96745	below threshold	13.8	4.64	0.91	cytosol	14.32	2.53	0.94	cytosol	15.29	4.07	1.01	cytosol	Permease of basic amino acids in the vacuolar membrane
YBR021W	FUR4	15.5	4.23825	below threshold	15.3445	3.90806	below threshold	15.6688	4.3237	below threshold	14.72	5.01	0.94	cytosol	16.89	4	1.08	cytosol	15.32	5.49	0.98	cytosol	Uracil permease, localized to the plasma membrane; expression is tightly regulated by uracil levels and environmental cues
YMR023C	MSS1	16.67	4.35377	mitochondria	15.347	4.55959	mitochondria	18.0153	3.52056	mitochondria	19.62	5.94	1.17	mitochondria	18.75	3.37	1.12	mitochondria	18.89	5.62	1.13	mitochondria	Mitochondrial protein, forms a heterodimer complex with Mto1p that performs the 5-carboxymethylaminomethyl modification of the wobble uridine base in mitochondrial tRNAs; similar to human GTPBP3
YGR291C	YGR291C	15.14	3.6934	below threshold	15.3478	3.7436	below threshold	14.9551	3.64681	below threshold	18.21	5.5	1.2	cytosol	14.8	3.26	0.97	cytosol	15.74	4.62	1.03	cytosol	Dubious open reading frame unlikely to encode a protein, based on available experimental and comparative sequence data
YDR431W	YDR431W	16.45	4.26977	below threshold	15.3489	4.4502	below threshold	17.5625	3.5275	below threshold	18.75	7.4	1.13	cytosol	18.19	3.66	1.1	cytosol	16.97	5.64	1.03	cytosol	Dubious ORF unlikely to encode a functional protein, based on available experimental and comparative sequence data
YHR216W	IMD2	15.96	3.83021	below threshold	15.3493	3.42925	below threshold	16.5941	3.9155	below threshold	18.16	7.42	1.13	cytosol	16.13	3.34	1.01	cytosol	16.32	3.35	1.02	cytosol	Inosine monophosphate dehydrogenase, catalyzes the rate-limiting step in GTP biosynthesis, expression is induced by mycophenolic acid resulting in resistance to the drug, expression is repressed by nutrient limitatio
YGR108W	CLB1	15.51	4.3028	below threshold	15.3515	4.3123	below threshold	15.6785	4.26245	below threshold	17.81	10.1	1.14	cytosol	17.55	4.73	1.13	cytosol	13.31	5.09	0.85	cytosol	B-type cyclin involved in cell cycle progression; activates Cdc28p to promote the transition from G2 to M phase; accumulates during G2 and M, then targeted via a destruction box motif for ubiquitin-mediated degradation by the proteasome
YKR037C	SPC34	15.72	4.44415	below threshold	15.3528	4.4607	below threshold	16.1053	4.38934	below threshold	17.34	5.25	1.1	cytosol	17.47	4.2	1.11	cytosol	19.92	4.31	1.26	cytosol	Essential subunit of the Dam1 complex (aka DASH complex), couples kinetochores to the force produced by MT depolymerization thereby aiding in chromosome segregation; also localized to nuclear side of spindle pole body
YOR044W	IRC23	15.67	3.47105	below threshold	15.3563	3.72441	below threshold	16.0046	3.40778	below threshold	15.37	5.02	0.98	cytosol	16.96	3.45	1.08	cytosol	18.15	4.23	1.15	cytosol	Putative protein of unknown function; green fluorescent protein (GFP)-fusion localizes to the ER; null mutant displays increased levels of spontaneous Rad52p foci
YGL038C	OCH1	15.22	3.87681	below threshold	15.3582	4.03475	below threshold	15.1045	3.73876	below threshold	14.37	4.44	0.94	cytosol	15.13	3.64	0.99	cytosol	16.96	6	1.11	cytosol	Mannosyltransferase of the cis-Golgi apparatus, initiates the polymannose outer chain elongation of N-linked oligosaccharides of glycoproteins
YBR184W	YBR184W	14.98	3.88607	below threshold	15.3641	3.7799	below threshold	14.6033	3.967	below threshold	18.44	6.1	1.23	cytosol	16.89	3.48	1.12	cytosol	17.13	4.93	1.14	cytosol	Putative protein of unknown function; YBR184W is not an essential gene
YDR143C	SAN1	14.45	3.86986	below threshold	15.3709	3.79555	below threshold	13.5495	3.76621	below threshold	17.24	5.82	1.19	cytosol	17.18	3.28	1.18	cytosol	15.03	2.64	1.03	cytosol	Ubiquitin-protein ligase, involved in the proteasome-dependent degradation of aberrant nuclear proteins
YKL005C	BYE1	15.54	3.05257	below threshold	15.3719	3.02047	below threshold	15.7149	3.04278	below threshold	16.4	5.5	1.05	cytosol	15.61	2.96	1	cytosol	16.96	4.77	1.09	cytosol	Negative regulator of transcription elongation, contains a TFIIS-like domain and a PHD finger, multicopy suppressor of temperature-sensitive ess1 mutations, probably binds RNA polymerase II large subunit
YGR221C	TOS2	15.36	3.78072	below threshold	15.3732	3.79209	below threshold	15.3569	3.77621	below threshold	16.52	5.03	1.07	cytosol	18.88	3.3	1.22	cytosol	17.84	6.83	1.16	cytosol	Protein involved in localization of Cdc24p to the site of bud growth; may act as a membrane anchor; localizes to the bud neck and bud tip; potentially phosphorylated by Cdc28p
YPL109C	YPL109C	14.93	3.36228	below threshold	15.3779	3.58934	below threshold	14.508	3.02893	below threshold	16.1	6.42	1.07	cytosol	14.79	3.37	0.98	cytosol	24.63	7.06	1.64	cytosol	Putative protein of unknown function; the authentic, non-tagged protein is detected in highly purified mitochondria in high-throughput studies
YLR012C	YLR012C	15.57	3.57119	below threshold	15.3795	3.71496	below threshold	15.7848	3.39515	below threshold	15.82	5.5	1.01	cytosol	16.4	3.21	1.05	cytosol	15.48	4.47	0.99	cytosol	Putative protein of unknown function; YLR012C is not an essential gene
YGL204C	YGL204C	15.93	4.08547	below threshold	15.3818	3.94721	below threshold	16.4879	4.22823	below threshold	16.82	6.33	1.05	cytosol	16.12	2.48	1.01	cytosol	16.58	5.39	1.04	cytosol	Dubious open reading frame unlikely to encode a functional protein, based on available experimental and comparative sequence data
YJL067W	YJL067W	14.67	3.36016	below threshold	15.3824	3.13641	below threshold	13.9761	3.47002	below threshold	17.63	6.51	1.2	cytosol	15.94	3.72	1.08	cytosol	16.69	2.36	1.13	cytosol	Dubious ORF unlikely to encode a functional protein, based on available experimental and comparative sequence data
YNL093W	YPT53	14.6	4.17352	below threshold	15.383	4.58527	below threshold	13.8333	3.54418	below threshold	15.32	4.61	1.04	cytosol	13.95	2.74	0.95	cytosol	16.81	6.18	1.15	cytosol	GTPase, similar to Ypt51p and Ypt52p and to mammalian rab5; required for vacuolar protein sorting and endocytosis
YOR364W	YOR364W	16.34	4.44316	below threshold	15.3837	4.2983	below threshold	17.3163	4.40018	below threshold	16.87	5.38	1.03	cytosol	17.13	4.27	1.04	cytosol	15.77	3.61	0.96	cytosol	Dubious open reading frame unlikely to encode a protein, based on available experimental and comparative sequence data; partially overlaps the uncharacterized ORF YOR365C
YBR298C	MAL31	15.18	3.86412	below threshold	15.3874	3.97969	below threshold	14.9935	3.70089	below threshold	13.98	4.25	0.92	cytosol	15.51	3.04	1.02	cytosol	15.69	5.64	1.03	cytosol	Maltose permease, high-affinity maltose transporter (alpha-glucoside transporter); encoded in the MAL3 complex locus; member of the 12 transmembrane domain superfamily of sugar transporters; functional in genomic reference strain S288C
YJL093C	TOK1	16.66	4.53159	below threshold	15.3898	4.9467	below threshold	17.9574	4.08995	below threshold	16.57	5.02	0.99	cytosol	15.03	2.9	0.9	cytosol	17.53	5.47	1.05	cytosol	Outward-rectifier potassium channel of the plasma membrane with two pore domains in tandem, each of which forms a functional channel permeable to potassium; carboxy tail functions to prevent inner gate closures; target of K1 toxin
YOL046C	YOL046C	17.06	4.48853	below threshold	15.3947	4.7153	below threshold	18.7456	3.77581	below threshold	18.74	7.19	1.09	cytosol	15.5	3.13	0.9	cytosol	17.42	4.83	1.02	cytosol	Dubious open reading frame unlikely to encode a protein, based on available experimental and comparative sequence data;almost completely overlaps the verified gene PSK2/YOL045W
YER052C	HOM3	15.32	3.60686	below threshold	15.4	3.74193	below threshold	15.2579	3.43652	below threshold	17.37	5.68	1.13	cytosol	17.49	3.36	1.14	cytosol	15.17	5.68	0.98	cytosol	Aspartate kinase (L-aspartate 4-P-transferase); cytoplasmic enzyme that catalyzes the first step in the common pathway for methionine and threonine biosynthesis; expression regulated by Gcn4p and the general control of amino acid synthesis
YCL045C	EMC1	15	4.24368	below threshold	15.4072	4.39489	below threshold	14.615	4.04993	below threshold	15.51	4.58	1.03	cytosol	15.39	2.54	1.02	cytosol	17.57	7.78	1.17	cytosol	Member of a transmembrane complex required for efficient folding of proteins in the ER; null mutant displays induction of the unfolded protein response; interacts with Gal80p
YPL070W	MUK1	14.27	4.05914	below threshold	15.4084	3.9981	below threshold	13.1407	3.86424	below threshold	17.73	5.89	1.24	cytosol	16.9	4.12	1.18	cytosol	16.55	4.29	1.15	cytosol	Cytoplasmic protein of unknown function containing a Vps9 domain; computational analysis of large-scale protein-protein interaction data suggests a possible role in transcriptional regulation
YHL043W	ECM34	16.9	3.62536	below threshold	15.4118	3.30674	below threshold	18.4013	3.42629	below threshold	15.03	5.81	0.88	cytosol	15.97	3.58	0.94	cytosol	18.79	4.17	1.11	cytosol	Putative protein of unknown function; member of the DUP380 subfamily of conserved, often subtelomerically-encoded proteins
YDR140W	MTQ2	17.07	3.95641	below threshold	15.4125	3.39856	below threshold	18.7588	3.78859	below threshold	17.56	6.95	1.02	cytosol	14.83	2.76	0.86	cytosol	14.54	2.85	0.85	cytosol	S-adenosylmethionine-dependent methyltransferase of the seven beta-strand family; subunit of complex with Trm112p that methylates translation release factor Sup45p (eRF1) in the ternary complex eRF1-eRF3-GTP; similar to E.coli PrmC
YER142C	MAG1	15.32	3.8402	below threshold	15.4158	3.60256	below threshold	15.24	4.41887	below threshold	15.98	6	1.04	cytosol	15.88	4.42	1.03	cytosol	19.69	5.15	1.28	cytosol	3-methyl-adenine DNA glycosylase involved in protecting DNA against alkylating agents; initiates base excision repair by removing damaged bases to create abasic sites that are subsequently repaired
YKL166C	TPK3	15.21	4.54249	below threshold	15.4174	5.08202	below threshold	15.0151	3.74738	below threshold	15.86	5.62	1.04	cytosol	14.65	2.52	0.96	cytosol	17.68	6.13	1.16	cytosol	cAMP-dependent protein kinase catalytic subunit; promotes vegetative growth in response to nutrients via the Ras-cAMP signaling pathway; partially redundant with Tpk1p and Tpk2p; localizes to P-bodies during stationary phase
YLR296W	YLR296W	14.99	3.61737	below threshold	15.418	3.63276	below threshold	14.577	3.55993	below threshold	17.05	5.99	1.13	cytosol	17.26	3.12	1.15	cytosol	17.57	5.75	1.17	cytosol	Dubious open reading frame unlikely to encode a protein, based on available experimental and comparative sequence data
YFL063W	YFL063W	15.84	4.1564	below threshold	15.4189	4.55599	below threshold	16.2782	3.33363	below threshold	15.77	5.36	0.99	cytosol	16.14	2.91	1.01	cytosol	17.28	4.14	1.09	cytosol	Dubious open reading frame, based on available experimental and comparative sequence data
YER042W	MXR1	17.14	4.45447	below threshold	15.4212	4.67314	below threshold	18.8774	3.90505	below threshold	14.83	5.97	0.86	cytosol	15.27	3.62	0.89	cytosol	16.62	4.38	0.96	cytosol	Methionine-S-sulfoxide reductase, involved in the response to oxidative stress; protects iron-sulfur clusters from oxidative inactivation along with MXR2; involved in the regulation of lifespan
YOR008C-A	YOR008C-A	16.24	4.13994	below threshold	15.4217	3.38236	below threshold	17.0798	4.4244	below threshold	17.15	5.39	1.05	cytosol	18.27	3.79	1.12	cytosol	15.08	3.01	0.92	cytosol	Putative protein of unknown function, includes a potential transmembrane domain; deletion results in slightly lengthened telomeres
YLR004C	THI73	16.01	4.15157	below threshold	15.4243	4.26006	below threshold	16.6035	3.81482	below threshold	15.54	5.74	0.97	cytosol	14.99	3.12	0.93	cytosol	18.44	4.79	1.15	cytosol	Putative plasma membrane permease proposed to be involved in carboxylic acid uptake and repressed by thiamine; substrate of Dbf2p/Mob1p kinase; transcription is altered if mitochondrial dysfunction occurs
YOR013W	IRC11	15.75	2.99543	below threshold	15.4286	3.02018	below threshold	16.0813	2.95515	below threshold	15.64	6.15	0.99	cytosol	17.86	3.51	1.13	cytosol	17.02	6.82	1.08	cytosol	Dubious opening reading frame unlikely to encode a protein, based on available experimental and comparative sequence data; partially overlaps the uncharacterized gene YOR012C; null mutant displays increased levels of spontaneous Rad52 foci
YHR123W	EPT1	15.42	4.48411	below threshold	15.4296	4.90215	below threshold	15.4367	3.77988	below threshold	16.52	6.02	1.07	cytosol	14.9	2.54	0.96	cytosol	15.24	3.68	0.98	cytosol	sn-1,2-diacylglycerol ethanolamine- and cholinephosphotranferase; not essential for viability
YKL153W	YKL153W	16.97	3.12504	below threshold	15.4312	2.92309	below threshold	18.5252	2.93761	below threshold	14.79	5.31	0.87	cytosol	15.08	2.82	0.88	cytosol	17.19	4.55	1.01	cytosol	Dubious open reading frame unlikely to encode a protein, based on available experimental and comparative sequence data; transcription of both YLK153W and the overlapping essential gene GPM1 is reduced in the gcr1 null mutant
YKL056C	TMA19	15.77	4.34097	below threshold	15.4324	4.37053	below threshold	16.1141	4.28637	below threshold	13.79	4.73	0.87	cytosol	15.65	3.77	0.99	cytosol	16.11	3.53	1.02	cytosol	Protein that associates with ribosomes; homolog of translationally controlled tumor protein; green fluorescent protein (GFP)-fusion protein localizes to the cytoplasm and relocates to the mitochondrial outer surface upon oxidative stress
YMR056C	AAC1	16.32	4.0165	mitochondria	15.4401	4.54013	mitochondria	17.206	3.47313	mitochondria	15.36	6	0.94	mitochondria	17.85	3.42	1.09	mitochondria	18.44	4.25	1.13	mitochondria	Mitochondrial inner membrane ADP/ATP translocator, exchanges cytosolic ADP for mitochondrially synthesized ATP; phosphorylated; Aac1p is a minor isoform while Pet9p is the major ADP/ATP translocator
YOR029W	YOR029W	15.75	3.57545	below threshold	15.4429	3.78682	below threshold	16.072	3.49951	below threshold	16.51	5.09	1.04	cytosol	17.32	4	1.09	cytosol	16.19	7.64	1.02	cytosol	Dubious open reading frame unlikely to encode a functional protein, based on available experimental and comparative sequence data
YAR029W	YAR029W	13.93	3.9946	below threshold	15.4452	4.17144	below threshold	12.4364	3.47024	below threshold	15.34	4.69	1.1	cytosol	14.25	3.12	1.02	cytosol	17.48	5.04	1.25	cytosol	Member of DUP240 gene family but contains no transmembrane domains; green fluorescent protein (GFP)-fusion protein localizes to the cytoplasm in a punctate pattern
YNL179C	YNL179C	15	3.88635	below threshold	15.4464	4.17046	below threshold	14.5639	3.59882	below threshold	15.15	4.7	1.01	cytosol	15.28	3.11	1.01	cytosol	22.26	4.19	1.48	cytosol	Dubious open reading frame, unlikely to encode a protein; not conserved in closely related Saccharomyces species; deletion in cyr1 mutant results in loss of stress resistance
YPR002C-A	YPR002C-A	14.87	4.15086	below threshold	15.4472	4.24429	below threshold	14.3021	4.00092	below threshold	17.02	5.41	1.14	cytosol	15.95	2.94	1.07	cytosol	14.6	3.5	0.98	cytosol	Dubious open reading frame unlikely to encode a protein, based on available experimental and comparative sequence data; completely overlaps the Ty1 long terminal repeat, YPRWdelta12
YOR015W	YOR015W	15.28	3.46313	below threshold	15.452	3.70122	below threshold	15.1235	3.28635	below threshold	18.32	5.63	1.19	cytosol	17.51	2.97	1.14	cytosol	17.31	3.9	1.13	cytosol	Dubious open reading frame unlikely to encode a functional protein, based on available experimental and comparative sequence data
YOL131W	YOL131W	15.71	3.91105	below threshold	15.454	3.53547	below threshold	15.9775	4.14895	below threshold	17.59	6.04	1.11	cytosol	17.31	3.4	1.1	cytosol	16.66	3.65	1.06	cytosol	Putative protein of unknown function
YML132W	COS3	14.23	4.7106	below threshold	15.4554	4.89826	below threshold	13.0185	4.39425	below threshold	15.22	7.75	1.06	cytosol	14.51	2.81	1.01	cytosol	17.96	6.82	1.26	cytosol	Protein involved in salt resistance; interacts with sodium:hydrogen antiporter Nha1p; member of the DUP380 subfamily of conserved, often subtelomerically-encoded proteins
YGR051C	YGR051C	15.77	3.46654	below threshold	15.4688	3.6328	below threshold	16.0862	3.2109	below threshold	16.43	5.13	1.04	cytosol	18.34	3.53	1.16	cytosol	17.26	5.15	1.09	cytosol	Dubious open reading frame unlikely to encode a protein, based on available experimental and comparative sequence data; YGR051C is not an essential gene
YDR033W	MRH1	15.11	4.02645	below threshold	15.4698	4.49547	below threshold	14.7713	3.47379	below threshold	14.91	4.4	0.98	cytosol	14.68	2.93	0.97	cytosol	16.94	6.13	1.12	cytosol	Protein that localizes primarily to the plasma membrane, also found at the nuclear envelope; the authentic, non-tagged protein is detected in mitochondria in a phosphorylated state; has similarity to Hsp30p and Yro2p
YIL031W	ULP2	15.35	3.3419	below threshold	15.4708	3.79753	below threshold	15.2324	3.03328	below threshold	13.73	4.18	0.89	cytosol	19.49	4.37	1.26	cytosol	17.32	8.64	1.12	cytosol	Peptidase that deconjugates Smt3/SUMO-1 peptides from proteins, plays a role in chromosome cohesion at centromeric regions and recovery from checkpoint arrest induced by DNA damage or DNA replication defects; potential Cdc28p substrate
YGL042C	YGL042C	14.82	3.87872	below threshold	15.4755	3.9202	below threshold	14.1878	3.73308	below threshold	15.52	5.89	1.04	cytosol	15.73	3.33	1.06	cytosol	17.1	6.07	1.15	cytosol	Dubious open reading frame, not conserved in closely related Saccharomyces species; deletion mutation blocks replication of Brome mosaic virus in S. cerevisiae, but this is likely due to effects on the overlapping gene DST1
YNL159C	ASI2	14.91	3.92071	below threshold	15.4817	4.6083	below threshold	14.3561	3.5011	below threshold	15.99	6.29	1.07	cytosol	15.3	3.68	1.02	cytosol	20.3	6.66	1.36	cytosol	Integral inner nuclear membrane protein that acts with Asi1p and Asi3p to ensure the fidelity of SPS-sensor signalling by maintaining the dormant repressed state of gene expression in the absence of inducing signals
YKL222C	YKL222C	15.98	3.90217	below threshold	15.4828	3.96747	below threshold	16.4906	3.77776	below threshold	19.14	6.23	1.19	cytosol	19.49	3.92	1.21	cytosol	15.48	3.41	0.96	cytosol	Protein of unknown function that may interact with ribosomes, based on co-purification experiments; similar to transcriptional regulators from the zinc cluster (binuclear cluster) family; null mutant is sensitive to caffeine
YDL139C	SCM3	16.54	4.04169	below threshold	15.4834	4.14495	below threshold	17.6122	3.34154	below threshold	16.7	5.7	1	cytosol	15.75	3.44	0.95	cytosol	17.3	4.82	1.04	cytosol	Nonhistone component of centromeric chromatin that binds stoichiometrically to CenH3-H4 histones, required for kinetochore assembly; contains nuclear export signal (NES); required for G2/M progression and localization of Cse4p
YPL092W	SSU1	14.84	3.98549	below threshold	15.4841	4.20373	below threshold	14.2143	3.67017	below threshold	15.21	5.31	1.02	cytosol	14.72	2.73	0.99	cytosol	16.82	4.46	1.13	cytosol	Plasma membrane sulfite pump involved in sulfite metabolism and required for efficient sulfite efflux; major facilitator superfamily protein
YLR255C	YLR255C	16.4	4.612	below threshold	15.4854	4.83216	below threshold	17.3372	4.26587	below threshold	16.74	5.2	1.02	cytosol	17.38	3.61	1.05	cytosol	16.11	3.62	0.98	cytosol	Dubious ORF unlikely to encode a functional protein, based on available experimental and comparative sequence data
YKL039W	PTM1	15.93	4.1241	below threshold	15.4855	4.01968	below threshold	16.397	4.21522	below threshold	14.27	5.62	0.89	cytosol	16.51	2.77	1.03	cytosol	18	5.31	1.12	cytosol	Protein of unknown function, copurifies with late Golgi vesicles containing the v-SNARE Tlg2p
YDR248C	YDR248C	16.45	3.43038	below threshold	15.4859	3.38641	below threshold	17.4323	3.32773	below threshold	15.6	6.33	0.94	cytosol	15.6	3.35	0.94	cytosol	18.13	8.54	1.1	cytosol	Putative protein of unknown function; sequence similarity to bacterial and human gluconokinase; green fluorescent protein (GFP)-fusion protein localizes to the cytoplasm; upregulated by deletion of the RNAP-II associated factor, PAF1
YOR352W	YOR352W	15.04	3.79232	below threshold	15.4911	3.99325	below threshold	14.5905	3.31385	below threshold	16.03	5.3	1.06	cytosol	17.51	3.5	1.16	cytosol	18.37	6.16	1.22	cytosol	Putative protein of unknown function; expression levels regulated by Arg5,6p; green fluorescent protein (GFP)-fusion protein localizes to the cytoplasm and nucleus
YNL305C	YNL305C	14.59	3.49638	below threshold	15.4949	3.56729	below threshold	13.7008	3.15197	below threshold	14.67	4.69	1	cytosol	14.4	2.89	0.98	cytosol	17.19	5.93	1.17	cytosol	Putative protein of unknown function; green fluorescent protein (GFP)-fusion protein localizes to the vacuole; YNL305C is not an essential gene
YHR005C-A	TIM10	15.7	3.70681	below threshold	15.4984	3.34071	below threshold	15.9135	3.88279	below threshold	18.82	5.5	1.19	cytosol	17	2.71	1.08	cytosol	15.34	3.54	0.97	cytosol	Essential protein of the mitochondrial intermembrane space, forms a complex with Tim9p (TIM10 complex) that delivers hydrophobic proteins to the TIM22 complex for insertion into the inner membrane
YKL008C	LAC1	14.21	3.70229	below threshold	15.5115	4.02367	below threshold	12.9104	2.6761	below threshold	14.51	4.7	1.02	cytosol	14.3	3.03	1	cytosol	16.03	6.27	1.12	cytosol	Ceramide synthase component, involved in synthesis of ceramide from C26(acyl)-coenzyme A and dihydrosphingosine or phytosphingosine, functionally equivalent to Lag1p
YDR543C	YDR543C	15.28	4.21929	below threshold	15.5129	3.97629	below threshold	15.0615	4.44809	below threshold	18.13	5.71	1.18	cytosol	17.99	3.5	1.17	cytosol	14.44	3.65	0.94	cytosol	Dubious open reading frame unlikely to encode a functional protein, based on available experimental and comparative sequence data
YNL004W	HRB1	15.38	3.6016	below threshold	15.5182	3.9404	below threshold	15.2535	3.24931	below threshold	16.8	5.59	1.09	cytosol	16.56	2.56	1.07	cytosol	14.17	2.5	0.92	cytosol	Poly(A+) RNA-binding protein, involved in the export of mRNAs from the nucleus to the cytoplasm; similar to Gbp2p and Npl3p
YHR219W	YHR219W	15.63	3.2833	below threshold	15.5212	4.06704	below threshold	15.7477	3.00317	below threshold	16.77	6.22	1.07	cytosol	19.41	3.53	1.24	cytosol	16.38	2.85	1.04	cytosol	Putative protein of unknown function with similarity to helicases; located in the telomere region on the right arm of chromosome VIII
YPL258C	THI21	14.79	3.51245	below threshold	15.5227	3.37034	below threshold	14.0676	3.51379	below threshold	17.6	6.68	1.18	cytosol	16.51	4.06	1.11	cytosol	17.64	8.18	1.19	cytosol	Hydroxymethylpyrimidine phosphate kinase, involved in the last steps in thiamine biosynthesis; member of a gene family with THI20 and THI22; Thi20p also has this activity
YJL135W	YJL135W	16.21	3.60756	below threshold	15.5268	3.55507	below threshold	16.9108	3.58597	below threshold	16.22	5.38	1	cytosol	16.87	3.4	1.04	cytosol	18.39	9.85	1.13	cytosol	Dubious open reading frame unlikely to encode a protein, based on available experimental and comparative sequence data; partially overlaps the verified genes YJL134W/LCB3
YJL044C	GYP6	14.5	4.25373	below threshold	15.5298	3.47518	below threshold	13.4975	4.52487	below threshold	16.87	5.39	1.16	cytosol	15.8	2.9	1.08	cytosol	16.19	4.66	1.11	cytosol	GTPase-activating protein (GAP) for the yeast Rab family member, Ypt6p; involved in vesicle mediated protein transport
YBR126C	TPS1	15.44	3.35187	below threshold	15.5309	3.14834	below threshold	15.3669	3.47932	below threshold	18.88	5.56	1.22	cytosol	16.3	2.77	1.05	cytosol	15.85	2.62	1.02	cytosol	Synthase subunit of trehalose-6-phosphate synthase/phosphatase complex, which synthesizes the storage carbohydrate trehalose; also found in a monomeric form; expression is induced by the stress response and repressed by the Ras-cAMP pathway
YDL079C	MRK1	15.16	3.23985	below threshold	15.5309	3.23698	below threshold	14.8025	3.2143	below threshold	17.44	6.05	1.15	cytosol	15.84	3.37	1.04	cytosol	17.94	3.46	1.18	cytosol	Glycogen synthase kinase 3 (GSK-3) homolog; one of four GSK-3 homologs in S. cerevisiae that function to activate Msn2p-dependent transcription of stress responsive genes and that function in protein degradation
YBR267W	REI1	15.37	2.92381	below threshold	15.542	3.12315	below threshold	15.2188	2.79688	below threshold	17.34	5.52	1.12	cytosol	18.01	3.66	1.17	cytosol	28.47	6.33	1.85	cytosol	Cytoplasmic pre-60S factor; required for the correct recycling of shuttling factors Alb1, Arx1 and Tif6 at the end of the ribosomal large subunit biogenesis; involved in bud growth in the mitotic signaling network
YBR290W	BSD2	14.59	3.99841	below threshold	15.5427	4.31133	below threshold	13.6559	3.34552	below threshold	14.86	5.44	1.01	cytosol	13.57	2.65	0.92	cytosol	18.75	7.62	1.28	cytosol	Heavy metal ion homeostasis protein, facilitates trafficking of Smf1p and Smf2p metal transporters to the vacuole where they are degraded, controls metal ion transport, prevents metal hyperaccumulation, functions in copper detoxification
YIL134W	FLX1	15.53	4.19689	below threshold	15.5429	5.38294	below threshold	15.5275	3.40399	below threshold	17.11	6.79	1.1	cytosol	16.55	2.56	1.06	cytosol	16.97	2.7	1.09	cytosol	Protein required for transport of flavin adenine dinucleotide (FAD), a synthesis product of riboflavin, across the mitochondrial membrane
YBL019W	APN2	16.7	3.31254	below threshold	15.5443	2.97109	below threshold	17.8735	3.35823	below threshold	18.04	6.75	1.08	cytosol	15.03	2.39	0.89	cytosol	12.95	2.21	0.77	cytosol	Class II abasic (AP) endonuclease involved in repair of DNA damage; homolog of human HAP1 and E. coli exoIII
YBR302C	COS2	15.26	4.22984	below threshold	15.5448	4.25628	below threshold	14.9806	4.18679	below threshold	16.43	9	1.07	cytosol	14.81	2.57	0.97	cytosol	18.06	4.95	1.18	cytosol	Protein of unknown function, member of the DUP380 subfamily of conserved, often subtelomerically-encoded proteins
YHR195W	NVJ1	15.18	3.33292	below threshold	15.5471	3.38521	below threshold	14.8315	3.27069	below threshold	13.13	4.57	0.86	cytosol	15.09	2.58	0.99	cytosol	14.53	3.75	0.95	cytosol	Nuclear envelope protein, anchored to the nuclear inner membrane, that interacts with the vacuolar membrane protein Vac8p to promote formation of nucleus-vacuole junctions during piecemeal microautophagy of the nucleus (PMN)
YCL068C	YCL068C	15.21	3.78233	below threshold	15.5482	3.94911	below threshold	14.8953	3.60003	below threshold	16.5	5.08	1.08	cytosol	17.9	3.73	1.17	cytosol	18.51	3.83	1.21	cytosol	Putative protein of unknown function
YFR048W	RMD8	15.42	3.86225	below threshold	15.5501	3.8671	below threshold	15.2929	3.85762	below threshold	18.64	5.42	1.2	cytosol	21.35	4.14	1.38	cytosol	16.56	3.65	1.07	cytosol	Cytosolic protein required for sporulation
YNL012W	SPO1	15.39	3.64912	below threshold	15.5523	4.10249	below threshold	15.2361	3.18787	below threshold	17.09	5.96	1.11	cytosol	14.02	3.7	0.91	cytosol	16.41	3.62	1.06	cytosol	Meiosis-specific prospore protein; required for meiotic spindle pole body duplication and separation; required to produce bending force necessary for proper prospore membrane assembly during sporulation; has similarity to phospholipase B
YML047C	PRM6	14.25	4.22873	below threshold	15.5557	4.52867	below threshold	12.9692	3.26029	below threshold	14.57	4.95	1.02	cytosol	15.25	3.34	1.06	cytosol	16.49	5.63	1.15	cytosol	Pheromone-regulated protein, predicted to have 2 transmembrane segments; regulated by Ste12p during mating
YOR389W	YOR389W	15.54	3.2587	below threshold	15.5568	3.43222	below threshold	15.5436	3.18339	below threshold	17.11	6.49	1.1	cytosol	13.63	3.25	0.87	cytosol	16.08	6.15	1.03	cytosol	Putative protein of unknown function; expression regulated by copper levels
YMR017W	SPO20	15.41	3.82141	below threshold	15.5622	3.86749	below threshold	15.2665	3.7666	below threshold	16.11	5.4	1.04	cytosol	17.26	3.61	1.12	cytosol	25.26	4.81	1.63	cytosol	Meiosis-specific subunit of the t-SNARE complex, required for prospore membrane formation during sporulation; similar to but not functionally redundant with Sec9p; SNAP-25 homolog
YPL267W	ACM1	18.47	5.78677	below threshold	15.5633	3.84381	below threshold	21.3878	5.75028	cytosol	19	8.06	1.02	cytosol	15.35	2.85	0.83	cytosol	15.97	2.71	0.86	cytosol	Pseudosubstrate inhibitor of the anaphase-promoting complex/cyclosome (APC/C), that suppresses APC/C [Cdh1]-mediated proteolysis of mitotic cyclins; associates with Cdh1p, Bmh1p and Bmh2p; cell cycle regulated protein
YLR174W	IDP2	15.85	4.01855	below threshold	15.5645	4.2061	below threshold	16.1409	3.78549	below threshold	17.63	8.04	1.11	cytosol	18.08	3.36	1.14	cytosol	18.29	6.04	1.15	cytosol	Cytosolic NADP-specific isocitrate dehydrogenase, catalyzes oxidation of isocitrate to alpha-ketoglutarate; levels are elevated during growth on non-fermentable carbon sources and reduced during growth on glucose
YDR220C	YDR220C	15.08	4.08016	below threshold	15.5655	4.17026	below threshold	14.6037	3.97441	below threshold	17.97	5.73	1.19	cytosol	16.37	2.6	1.08	cytosol	15.96	4.17	1.05	cytosol	Dubious open reading frame, null mutant exhibits synthetic phenotype with alpha-synuclein
YGR079W	YGR079W	15.39	3.94461	below threshold	15.5714	4.07092	below threshold	15.2129	3.58382	below threshold	13.81	6.09	0.89	cytosol	18.17	4.07	1.18	cytosol	28.53	7.22	1.85	cytosol	Putative protein of unknown function; YGR079W is not an essential gene
YOR213C	SAS5	16.64	3.9543	below threshold	15.5836	4.16013	below threshold	17.7188	3.37124	below threshold	16.89	6.32	1.01	cytosol	15.97	3.27	0.95	cytosol	15.29	3.6	0.91	cytosol	Subunit of the SAS complex (Sas2p, Sas4p, Sas5p), which acetylates free histones and nucleosomes and regulates transcriptional silencing; stimulates Sas2p HAT activity
YGR061C	ADE6	15.84	4.01597	below threshold	15.5852	4.08375	below threshold	16.1193	3.83611	below threshold	15.52	4.24	0.97	cytosol	17.09	4.21	1.07	cytosol	18.69	9.35	1.17	cytosol	Formylglycinamidine-ribonucleotide (FGAM)-synthetase, catalyzes a step in the 'de novo' purine nucleotide biosynthetic pathway
YMR218C	TRS130	15.33	3.98865	below threshold	15.5865	4.17023	below threshold	15.093	3.77243	below threshold	13.12	4.39	0.85	cytosol	18.17	3.73	1.18	cytosol	17.34	2.94	1.13	cytosol	One of 10 subunits of the transport protein particle (TRAPP) complex of the cis-Golgi which mediates vesicle docking and fusion; involved in ER to Golgi membrane traffic; mutation activates transcription of OCH1
YMR232W	FUS2	16.39	4.41934	below threshold	15.5888	4.37699	below threshold	17.2249	4.27878	below threshold	15.89	6.51	0.96	cytosol	17.61	4.41	1.07	cytosol	15.53	3.15	0.94	cytosol	Cytoplasmic protein localized to the shmoo tip; required for the alignment of parental nuclei before nuclear fusion during mating
YPR039W	YPR039W	14.75	4.15965	below threshold	15.5957	4.53733	below threshold	13.9274	3.55787	below threshold	16.83	5.8	1.14	cytosol	15.55	3.76	1.05	cytosol	16.68	6.65	1.13	cytosol	Dubious open reading frame unlikely to encode a protein, based on available experimental and comparative sequence data; partially overlaps the verified non essential genes ERV2/YPR037C and TIP41/YPR040W
YLL056C	YLL056C	15.1	3.88552	below threshold	15.5989	4.67963	below threshold	14.6205	3.54882	below threshold	15.08	5.87	0.99	cytosol	14.6	4.08	0.96	cytosol	18.37	4.61	1.21	cytosol	Putative protein of unknown function, transcription is activated by paralogous transcription factors Yrm1p and Yrr1p and genes involved in pleiotropic drug resistance (PDR); expression is induced in cells treated with the mycotoxin patulin
YER021W	RPN3	16.7	4.01159	below threshold	15.5991	4.04027	below threshold	17.8172	3.66737	below threshold	19.2	7.62	1.14	cytosol	16.57	3.03	0.99	cytosol	15.65	2.3	0.93	cytosol	Essential, non-ATPase regulatory subunit of the 26S proteasome lid, similar to the p58 subunit of the human 26S proteasome; temperature-sensitive alleles cause metaphase arrest, suggesting a role for the proteasome in cell cycle control
YER080W	AIM9	15.93	3.35298	below threshold	15.6001	3.54555	below threshold	16.2724	3.13452	below threshold	16.49	7.3	1.03	cytosol	16.54	3.86	1.03	cytosol	17.28	3.89	1.08	cytosol	Putative protein of unknown function; the authentic, non-tagged protein is detected in highly purified mitochondria in high-throughput studies; null mutant displays elevated frequency of mitochondrial genome loss
YOL101C	IZH4	14.64	4.85887	below threshold	15.6014	5.17282	below threshold	13.681	4.12745	below threshold	14.79	5.18	1.01	cytosol	15.36	3.48	1.04	cytosol	15.68	4.37	1.07	cytosol	Membrane protein involved in zinc ion homeostasis, member of the four-protein IZH family, expression induced by fatty acids and altered zinc levels; deletion reduces sensitivity to excess zinc; possible role in sterol metabolism
YNL275W	BOR1	15.91	4.45773	below threshold	15.6051	4.76898	below threshold	16.2477	3.96518	below threshold	14.51	4.45	0.91	cytosol	15.48	3.19	0.97	cytosol	17.06	3.69	1.07	cytosol	Boron efflux transporter of the plasma membrane; binds HCO3-, I-, Br-, NO3- and Cl-; has similarity to the characterized boron efflux transporter A. thaliana BOR1
YLR421C	RPN13	16.29	3.62892	below threshold	15.6052	3.77127	below threshold	16.9908	3.20169	below threshold	15.94	5.21	0.97	cytosol	15.99	3.27	0.98	cytosol	17.87	3.17	1.09	cytosol	Subunit of the 19S regulatory particle of the 26S proteasome lid; acts as a ubiquitin receptor for the proteasome; null mutants accumulate ubiquitinated Gcn4p and display decreased 26S proteasome stability
YGL003C	CDH1	15.77	3.42501	below threshold	15.6063	3.4351	below threshold	15.9429	3.40591	below threshold	18.26	5.43	1.15	cytosol	15.76	3.82	0.99	cytosol	25.25	8.23	1.6	cytosol	Cell-cycle regulated activator of the anaphase-promoting complex/cyclosome (APC/C), which directs ubiquitination of cyclins resulting in mitotic exit; targets the APC/C to specific substrates including Cdc20p, Ase1p, Cin8p and Fin1p
YOR011W	AUS1	15.92	3.60311	below threshold	15.61	4.05683	below threshold	16.2318	2.93917	below threshold	15.91	5.96	0.99	cytosol	15.85	3.73	0.99	cytosol	16.31	5.93	1.02	cytosol	Transporter of the ATP-binding cassette family, involved in uptake of sterols and anaerobic growth
YPL188W	POS5	15.2	3.8938	below threshold	15.6156	4.40522	below threshold	14.8072	3.67818	below threshold	15.85	5.4	1.04	cytosol	14.07	2.87	0.92	cytosol	15.92	8.03	1.04	cytosol	Mitochondrial NADH kinase, phosphorylates NADH; also phosphorylates NAD(+) with lower specificity; required for the response to oxidative stress
YDR203W	YDR203W	16.23	4.02743	below threshold	15.6193	3.72153	below threshold	16.8531	4.20341	below threshold	19.58	9.21	1.2	cytosol	17.78	4.76	1.09	cytosol	16.68	4.43	1.02	cytosol	Dubious open reading frame unlikely to encode a functional protein, based on available experimental and comparative sequence data
YAR053W	YAR053W	14.11	3.69202	below threshold	15.6223	3.70978	below threshold	12.6191	3.10601	below threshold	15.14	4.97	1.07	cytosol	14.1	2.79	0.99	cytosol	17.38	6.64	1.23	cytosol	Dubious open reading frame unlikely to encode a protein, based on available experimental and comparative sequence data
YDL032W	YDL032W	15.17	3.64646	below threshold	15.6234	3.66841	below threshold	14.7327	3.61185	below threshold	15.77	4.67	1.03	cytosol	17.38	3.06	1.14	cytosol	17.11	3.35	1.12	cytosol	Dubious open reading frame unlikely to encode a protein, based on available experimental and comparative sequence data; partially overlaps verified gene SLM3/YDL033C; YDL032W is not an essential gene
YJL127W-A	YJL127W-A	15.12	3.8973	below threshold	15.6238	4.10879	below threshold	14.6369	3.65928	below threshold	16.8	7.05	1.11	cytosol	16.21	3.16	1.07	cytosol	15.16	6.18	1	cytosol	Dubious open reading frame unlikely to encode a protein, based on available experimental and comparative sequence data
YAL010C	MDM10	14.72	3.99562	below threshold	15.6242	3.98493	below threshold	13.8354	3.73971	below threshold	14.53	4.76	0.98	cytosol	14.75	3.07	1	cytosol	16.58	3.74	1.12	cytosol	Subunit of both the ERMES complex that links the ER to mitochondria, and of the mitochondrial sorting and assembly machinery (SAM complex) that functions in import and assembly of outer membrane beta-barrel proteins
YKR075C	YKR075C	15.62	3.45972	below threshold	15.6275	2.86627	below threshold	NA	NA	technical problem	NA	NA	NA	cytosol	NA	NA	NA	cytosol	NA	NA	NA	technical problem	Protein of unknown function; similar to YOR062Cp and Reg1p; expression regulated by glucose and Rgt1p; GFP-fusion protein is induced in response to the DNA-damaging agent MMS
YOL162W	YOL162W	16.41	3.57846	below threshold	15.6291	3.47505	below threshold	17.221	3.59331	below threshold	17.37	7.5	1.05	cytosol	14.06	2.2	0.85	cytosol	19.03	2.89	1.15	cytosol	Putative protein of unknown function; member of the Dal5p subfamily of the major facilitator family
YNR073C	YNR073C	15.79	3.4817	below threshold	15.6313	3.20023	below threshold	15.9592	3.84493	below threshold	19.01	6.18	1.2	cytosol	16.29	2.98	1.03	cytosol	14.32	2.34	0.9	cytosol	Putative mannitol dehydrogenase
YOR212W	STE4	15.18	3.83936	below threshold	15.6409	4.36873	below threshold	14.7361	2.88833	below threshold	13.16	4.34	0.86	cytosol	15.13	3.01	0.99	cytosol	13.96	2.72	0.91	cytosol	G protein beta subunit, forms a dimer with Ste18p to activate the mating signaling pathway, forms a heterotrimer with Gpa1p and Ste18p to dampen signaling; may recruit Rho1p to the polarized growth site during mating; contains WD40 repeats
YML120C	NDI1	15.59	3.36988	below threshold	15.6431	3.4624	below threshold	15.5508	3.28443	below threshold	18.06	6.91	1.15	cytosol	16.41	2.73	1.05	cytosol	15.21	2.97	0.97	cytosol	NADH:ubiquinone oxidoreductase, transfers electrons from NADH to ubiquinone in the respiratory chain but does not pump protons, in contrast to the higher eukaryotic multisubunit respiratory complex I; phosphorylated; homolog of human AMID
YDR113C	PDS1	14.61	3.47638	below threshold	15.6519	2.94174	below threshold	13.5785	3.52045	below threshold	16.96	5.34	1.16	cytosol	16.93	2.79	1.15	cytosol	23.55	4.63	1.61	cytosol	Securin, inhibits anaphase by binding separin Esp1p; blocks cyclin destruction and mitotic exit, essential for meiotic progression and mitotic cell cycle arrest; localization is cell-cycle dependent and regulated by Cdc28p phosphorylation
YGL159W	YGL159W	14.81	4.32346	below threshold	15.6536	4.3581	below threshold	13.9864	4.14264	below threshold	14.97	5.48	1.01	cytosol	18.15	4.52	1.22	cytosol	27.41	7.29	1.85	cytosol	Putative protein of unknown function; deletion mutant has no detectable phenotype
YOL003C	PFA4	14.41	4.35503	below threshold	15.6569	4.53523	below threshold	13.1725	3.84287	below threshold	15	4.81	1.04	cytosol	14.15	3.15	0.98	cytosol	16.68	7.28	1.15	cytosol	Palmitoyltransferase with autoacylation activity, required for palmitoylation of amino acid permeases containing a C-terminal Phe-Trp-Cys site; required for modification of Chs3p; member of the DHHC family of putative palmitoyltransferases
YDR306C	YDR306C	15.52	3.25793	below threshold	15.6594	2.72081	below threshold	15.3976	3.37424	below threshold	18.24	6.19	1.17	cytosol	17.19	3.23	1.1	cytosol	17.15	2.96	1.1	cytosol	F-box protein of unknown function; interacts with Sgt1p via a Leucine-Rich Repeat (LRR) domain
YPR038W	IRC16	16.1	3.89288	below threshold	15.6608	3.92297	below threshold	16.5435	3.67431	below threshold	16.96	6.27	1.05	cytosol	16.27	3.47	1.01	cytosol	17.18	6.01	1.06	cytosol	Dubious open reading frame unlikely to encode a protein, based on available experimental and comparative sequence data; partially overlaps verified gene YPR037C; null mutant displays increased levels of spontaneous Rad52p foci
YDR013W	PSF1	16.94	3.9496	below threshold	15.6612	3.42654	below threshold	18.2312	3.98976	below threshold	16.24	5.41	0.95	cytosol	13.24	2.31	0.78	cytosol	14.95	3.21	0.88	cytosol	Subunit of the GINS complex (Sld5p, Psf1p, Psf2p, Psf3p), which is localized to DNA replication origins and implicated in assembly of the DNA replication machinery
YIL007C	NAS2	16.39	4.00663	below threshold	15.6623	3.57077	below threshold	17.1289	4.17029	below threshold	17.77	6.28	1.08	cytosol	14.62	2.39	0.89	cytosol	15.15	4.28	0.92	cytosol	Proteasome-interacting protein involved in the assembly of the base subcomplex of the 19S proteasomal regulatory particle (RP); similar to mammalian proteasomal modulator subunit; non-essential gene; interacts with Rpn4p
YDR146C	SWI5	15.61	3.47346	below threshold	15.668	3.96714	below threshold	15.5641	3.17017	below threshold	16.96	6.21	1.08	cytosol	16.86	3.57	1.07	cytosol	17.34	5.6	1.11	cytosol	Transcription factor that activates transcription of genes expressed at the M/G1 phase boundary and in G1 phase; localization to the nucleus occurs during G1 and appears to be regulated by phosphorylation by Cdc28p kinase
YLR352W	YLR352W	15.67	3.40625	below threshold	15.6711	3.38056	below threshold	NA	NA	technical problem	NA	NA	NA	cytosol	NA	NA	NA	technical problem	NA	NA	NA	cytosol	Putative protein of unknown function with similarity to F-box proteins; interacts with Skp1p and Cdc53p; YLR352W is not an essential gene
YIL100W	YIL100W	15.08	3.83484	below threshold	15.6842	4.0237	below threshold	14.4862	3.51401	below threshold	16.38	5.23	1.08	cytosol	16.21	3.92	1.07	cytosol	15.87	6.53	1.05	cytosol	Dubious open reading frame unlikely to encode a protein, based on available experimental and comparative sequence data; completely overlaps the dubious ORF YIL100C-A
YAR047C	YAR047C	16.51	4.07599	below threshold	15.6885	4.01336	below threshold	17.3553	4.063	below threshold	16.49	5.68	0.99	cytosol	18.03	4.46	1.09	cytosol	17.04	3.48	1.03	cytosol	Dubious open reading frame unlikely to encode a protein, based on available experimental and comparative sequence data
YOR087W	YVC1	16.13	3.82489	below threshold	15.6898	3.85482	below threshold	16.5829	3.71209	below threshold	18.15	6.9	1.12	cytosol	16.43	3.09	1.01	cytosol	16.41	4.03	1.01	cytosol	Vacuolar cation channel, mediates release of Ca(2+) from the vacuole in response to hyperosmotic shock
YNL294C	RIM21	15.22	3.77688	below threshold	15.6907	3.43353	below threshold	14.7642	3.92285	below threshold	18.45	7.53	1.21	cytosol	15.29	3.24	1	cytosol	15.61	3.17	1.02	cytosol	Component of the RIM101 pathway, has a role in cell wall construction and alkaline pH response; has similarity to A. nidulans PalH
YEL073C	YEL073C	16.34	4.76381	below threshold	15.6931	4.63266	below threshold	16.991	4.83692	below threshold	18.84	5.31	1.15	cytosol	16.92	3.74	1.03	cytosol	19.76	4.67	1.2	cytosol	Putative protein of unknown function; located adjacent to ARS503 and the telomere on the left arm of chromosome V; regulated by inositol/choline
YLR049C	YLR049C	15.08	3.84313	below threshold	15.6934	4.44986	below threshold	14.4893	3.12513	below threshold	15.93	5.26	1.05	cytosol	16.77	3.01	1.11	cytosol	14.74	2.21	0.97	cytosol	Putative protein of unknown function
YJL059W	YHC3	15.14	3.79061	below threshold	15.6957	3.36505	below threshold	14.6066	4.02178	below threshold	14.65	5.07	0.96	cytosol	13.93	2.27	0.91	cytosol	15.21	4.93	1	cytosol	Vacuolar membrane protein involved in the ATP-dependent transport of arginine into the vacuole and possibly in balancing ion homeostasis; homolog of human CLN3 involved in Batten disease (juvenile onset neuronal ceroid lipofuscinosis)
YJR062C	NTA1	14.5	4.25549	below threshold	15.6959	4.14476	below threshold	13.3105	4.1378	below threshold	16.6	6.2	1.14	cytosol	17.58	2.88	1.21	cytosol	16.51	3.82	1.13	cytosol	Amidase, removes the amide group from N-terminal asparagine and glutamine residues to generate proteins with N-terminal aspartate and glutamate residues that are targets of ubiquitin-mediated degradation
YER014W	HEM14	15.98	4.19817	below threshold	15.697	4.20895	below threshold	16.2891	4.20045	below threshold	14.28	5.32	0.89	cytosol	15.55	3.12	0.97	cytosol	16.46	3.71	1.02	cytosol	Protoporphyrinogen oxidase, a mitochondrial enzyme that catalyzes the seventh step in the heme biosynthetic pathway, converting protoporphyrinogen IX to protoporphyrin IX; inhibited by diphenyl ether-type herbicides
YDR223W	CRF1	15.41	3.48085	below threshold	15.6977	3.85758	below threshold	15.1428	3.13214	below threshold	19.23	10.57	1.24	cytosol	17.36	3.16	1.12	cytosol	14.57	2.76	0.94	cytosol	Transcriptional corepressor involved in repression of ribosomal protein (RP) gene transcription via the TOR signaling pathway which promotes accumulation of Crf1p in the nucleus; role in repression of RP genes varies by strain
YBR040W	FIG1	15.3	3.82713	below threshold	15.7071	3.90547	below threshold	14.9218	3.71921	below threshold	14.76	4.18	0.96	cytosol	14.21	2.63	0.92	cytosol	15.77	3.84	1.03	cytosol	Integral membrane protein required for efficient mating; may participate in or regulate the low affinity Ca2+ influx system, which affects intracellular signaling and cell-cell fusion during mating
YLR246W	ERF2	15.23	4.62026	below threshold	15.7106	4.98428	below threshold	14.7551	4.01742	below threshold	16.57	6.18	1.08	cytosol	15.04	2.72	0.98	cytosol	18.49	5.18	1.21	cytosol	Subunit of a palmitoyltransferase, composed of Erf2p and Shr5p, that adds a palmitoyl lipid moiety to heterolipidated substrates such as Ras1p and Ras2p through a thioester linkage; mutants partially mislocalize Ras2p to the vacuole
YER136W	GDI1	15.25	3.13125	below threshold	15.7205	3.50351	below threshold	14.7832	2.86363	below threshold	14.12	4.1	0.92	cytosol	14.72	3.04	0.96	cytosol	17.05	5.8	1.11	cytosol	GDP dissociation inhibitor, regulates vesicle traffic in secretory pathways by regulating the dissociation of GDP from the Sec4/Ypt/rab family of GTP binding proteins
YGR227W	DIE2	16.09	3.84026	below threshold	15.7215	4.10556	below threshold	16.4688	3.39049	below threshold	18.1	6.55	1.12	cytosol	17.11	3.94	1.06	cytosol	16.88	4.8	1.04	cytosol	Dolichyl-phosphoglucose-dependent alpha-1,2 glucosyltransferase of the ER, functions in the pathway that synthesizes the dolichol-linked oligosaccharide precursor for N-linked protein glycosylation, has a role in regulation of ITR1 and INO1
YOR355W	GDS1	15.47	3.07535	below threshold	15.7232	3.36798	below threshold	15.2315	2.75299	below threshold	16.6	5.01	1.07	cytosol	15.78	3.33	1.02	cytosol	17.55	5.01	1.13	cytosol	Protein of unknown function, required for growth on glycerol as a carbon source; the authentic, non-tagged protein is detected in highly purified mitochondria in high-throughput studies
YOL158C	ENB1	15.99	3.89359	below threshold	15.7234	3.67671	below threshold	16.2626	3.99412	below threshold	14.68	4.74	0.91	cytosol	16.22	3.55	1.01	cytosol	16.83	5.19	1.05	cytosol	Endosomal ferric enterobactin transporter, expressed under conditions of iron deprivation; member of the major facilitator superfamily; expression is regulated by Rcs1p and affected by chloroquine treatment
YGR025W	YGR025W	15.17	4.08894	below threshold	15.7259	4.02871	below threshold	14.6262	4.11996	below threshold	16.1	9.85	1.06	cytosol	16.76	3.16	1.1	cytosol	15.25	5.66	1	cytosol	Dubious open reading frame unlikely to encode a functional protein, based on available experimental and comparative sequence data
YNR057C	BIO4	17.23	3.9048	below threshold	15.7302	3.97731	below threshold	18.7439	3.37599	below threshold	17.28	6.17	1	cytosol	15.42	2.63	0.89	cytosol	17.09	5.47	0.99	cytosol	Dethiobiotin synthetase, catalyzes the third step in the biotin biosynthesis pathway; BIO4 is in a cluster of 3 genes (BIO3, BIO4, and BIO5) that mediate biotin synthesis; expression appears to be repressed at low iron levels
YPL167C	REV3	16.06	3.64122	below threshold	15.7381	3.7133	below threshold	16.4096	3.5365	below threshold	13.96	4.91	0.86	cytosol	18.55	3.17	1.15	cytosol	16.8	6.73	1.04	cytosol	Catalytic subunit of DNA polymerase zeta, involved in translesion synthesis during post-replication repair; required for mutagenesis induced by DNA damage; involved in double-strand break repair
YLR424W	SPP382	15.42	3.69414	below threshold	15.7413	3.78274	below threshold	15.1017	3.48402	below threshold	19.11	7.41	1.23	cytosol	17.68	3.58	1.14	cytosol	17.07	4.4	1.1	cytosol	Essential protein that forms a dimer with Ntr2p; also forms a trimer, with Ntr2p and Prp43p, that is involved in spliceosome disassembly; found also in a multisubunit complex with the splicing factor Clf1p; suppressor of prp38-1 mutation
YLR361C	DCR2	14.84	3.12781	below threshold	15.7463	3.04072	below threshold	13.9443	3.07808	below threshold	17.65	6.27	1.18	cytosol	16.25	3.27	1.09	cytosol	15.52	4.67	1.04	cytosol	Phosphoesterase involved in downregulation of the unfolded protein response, at least in part via dephosphorylation of Ire1p; dosage-dependent positive regulator of the G1/S phase transition through control of the timing of START
YLL010C	PSR1	15	3.94575	below threshold	15.7479	3.91134	below threshold	14.269	3.78157	below threshold	14.37	5.44	0.95	cytosol	14.76	2.61	0.98	cytosol	17.61	4.43	1.17	cytosol	Plasma membrane associated protein phosphatase involved in the general stress response; required along with binding partner Whi2p for full activation of STRE-mediated gene expression, possibly through dephosphorylation of Msn2p
YDL248W	COS7	15.25	4.2702	below threshold	15.75	4.31157	below threshold	14.7682	4.18829	below threshold	15.8	5.44	1.03	cytosol	13.87	2.57	0.9	cytosol	19.39	6.07	1.27	cytosol	Protein of unknown function, member of the DUP380 subfamily of conserved, often subtelomerically-encoded proteins; the authentic, non-tagged protein is detected in highly purified mitochondria in high-throughput studies
YER183C	FAU1	16.22	3.534	below threshold	15.7506	3.84767	below threshold	16.7055	3.38771	below threshold	17.72	5.45	1.09	cytosol	14.15	2.19	0.87	cytosol	15.58	4.06	0.96	cytosol	5,10-methenyltetrahydrofolate synthetase, involved in folic acid biosynthesis
YKL140W	TGL1	15.77	3.90706	below threshold	15.7556	2.99289	below threshold	15.8082	4.28248	below threshold	16.67	5.96	1.05	cytosol	18.79	4.33	1.19	cytosol	16.4	3.21	1.03	cytosol	Steryl ester hydrolase, one of three gene products (Yeh1p, Yeh2p, Tgl1p) responsible for steryl ester hydrolase activity and involved in sterol homeostasis; localized to lipid particle membranes
YNL165W	YNL165W	14.18	3.75052	below threshold	15.7597	3.676	below threshold	12.6274	3.25302	below threshold	16.77	9.28	1.18	cytosol	15.54	2.81	1.09	cytosol	14.03	2.77	0.98	cytosol	Putative protein of unknown function; YNL165W is not an essential gene
YCR076C	YCR076C	17	4.31471	below threshold	15.7606	3.92022	below threshold	18.2579	4.28222	below threshold	18.29	7.7	1.07	cytosol	13.99	3.97	0.82	cytosol	24.53	6.08	1.44	cytosol	Putative protein of unknown function; YCR076C is not an essential gene
YGR184C	UBR1	14.83	3.77584	below threshold	15.7627	3.82933	below threshold	13.908	3.6069	below threshold	15.91	5.95	1.07	cytosol	19.36	3.58	1.3	cytosol	16.73	3.44	1.12	cytosol	E3 ubiquitin ligase (N-recognin), forms heterodimer with Rad6p to ubiquitinate substrates in the N-end rule pathway; regulates peptide transport via Cup9p ubiquitination; mutation in human UBR1 causes Johansson-Blizzard Syndrome (JBS)
YOR231W	MKK1	15.05	3.77836	below threshold	15.7665	3.63741	below threshold	14.3536	3.76939	below threshold	17.95	6.2	1.19	cytosol	17.11	3.5	1.13	cytosol	17.51	7	1.16	cytosol	Mitogen-activated kinase kinase involved in protein kinase C signaling pathway that controls cell integrity; upon activation by Bck1p phosphorylates downstream target, Slt2p; functionally redundant with Mkk2p
YIL056W	VHR1	16.32	3.78919	below threshold	15.7688	3.99066	below threshold	16.8995	3.56945	below threshold	18.3	6.96	1.12	cytosol	19.5	3.69	1.19	cytosol	17.84	6.56	1.09	cytosol	Transcriptional activator, required for the vitamin H-responsive element (VHRE) mediated induction of VHT1 (Vitamin H transporter) and BIO5 (biotin biosynthesis intermediate transporter) in response to low biotin concentrations
YCR031C	RPS14A	17.26	4.14813	below threshold	15.77	2.91511	below threshold	18.7754	4.57107	below threshold	16.83	6.65	0.97	cytosol	15.04	2.47	0.87	cytosol	18.1	4.15	1.04	cytosol	Ribosomal protein 59 of the small subunit, required for ribosome assembly and 20S pre-rRNA processing; mutations confer cryptopleurine resistance; nearly identical to Rps14Bp and similar to E. coli S11 and rat S14 ribosomal proteins
YMR018W	YMR018W	15.04	4.15514	below threshold	15.7739	4.36259	below threshold	14.3242	3.95916	below threshold	18.62	5.24	1.23	cytosol	16.73	3.12	1.11	cytosol	16.05	3.4	1.06	cytosol	Putative protein of unknown function with similarity to human PEX5Rp (peroxin protein 5 related protein); transcription increases during colony development similar to genes involved in peroxisome biogenesis; YMR018W is not an essential gene
YMR065W	KAR5	14.73	4.25018	below threshold	15.7758	4.42801	below threshold	13.7026	3.55636	below threshold	15.12	4.05	1.02	cytosol	14.6	2.27	0.99	cytosol	17.14	5.39	1.16	cytosol	Protein required for nuclear membrane fusion during karyogamy, localizes to the membrane with a soluble portion in the endoplasmic reticulum lumen, may form a complex with Jem1p and Kar2p; expression of the gene is regulated by pheromone
YGR212W	SLI1	16.25	3.76945	below threshold	15.7771	3.34355	below threshold	16.7353	3.85667	below threshold	16.41	5.62	1	cytosol	15.34	3.2	0.94	cytosol	13.24	2.15	0.81	cytosol	N-acetyltransferase, confers resistance to the sphingolipid biosynthesis inhibitor myriocin (ISP-1) by converting it into N-acetyl-myriocin, co-operates with Ypk1p in mediating resistance to myriocin
YKL131W	YKL131W	16.5	3.41305	below threshold	15.7781	3.15731	below threshold	17.2362	3.48706	below threshold	16.41	5.55	0.99	cytosol	16.43	3.1	0.99	cytosol	16.77	7.59	1.01	cytosol	Dubious ORF unlikely to encode a functional protein, based on available experimental and comparative sequence data
YNL034W	YNL034W	16.16	3.45924	below threshold	15.7788	3.20449	below threshold	16.5594	3.55578	below threshold	17.48	6.07	1.08	cytosol	16.24	3.5	1	cytosol	16.73	3.07	1.03	cytosol	Putative protein of unknown function; YNL034W is not an essential gene
YMR001C	CDC5	15.48	3.44726	below threshold	15.7838	3.44139	below threshold	15.1958	3.4334	below threshold	17.37	6.17	1.12	cytosol	19.46	4.18	1.25	cytosol	16.57	2.94	1.06	cytosol	Polo-like kinase with similarity to Xenopus Plx1 and S. pombe Plo1p; found at bud neck, nucleus and SPBs; has multiple functions in mitosis and cytokinesis through phosphorylation of substrates; may be a Cdc28p substrate
YGR131W	YGR131W	16.96	3.97303	below threshold	15.7838	3.74358	below threshold	18.1508	3.81541	below threshold	14.41	5.12	0.84	cytosol	16.37	3.63	0.96	cytosol	17.29	7.08	1.01	cytosol	Protein of unknown function; expression induced in response to ketoconazole; promoter region contains a sterol regulatory element motif, which has been identified as a Upc2p-binding site
YKL069W	YKL069W	16.78	3.87637	below threshold	15.7852	4.08559	below threshold	17.7904	3.26723	below threshold	15.52	5.96	0.92	cytosol	16.39	2.99	0.97	cytosol	18.61	4.45	1.1	cytosol	Methionine-R-sulfoxide reductase, reduces the R enantiomer of free Met-SO, in contrast to Ycl033Cp which reduces Met-R-SO in a peptide linkage; has a role in protection against oxidative stress
YFL002C	SPB4	15.28	3.56648	below threshold	15.7857	2.95891	below threshold	14.7976	3.80704	below threshold	16.71	5.69	1.09	cytosol	16.86	3.04	1.1	cytosol	16.65	4.42	1.08	cytosol	Putative ATP-dependent RNA helicase, nucleolar protein required for synthesis of 60S ribosomal subunits at a late step in the pathway; sediments with 66S pre-ribosomes in sucrose gradients
YDR188W	CCT6	15.41	3.24635	below threshold	15.7859	2.75014	below threshold	15.0583	3.45092	below threshold	17.13	6.78	1.11	cytosol	15.79	3.56	1.02	cytosol	18.24	8.68	1.18	cytosol	Subunit of the cytosolic chaperonin Cct ring complex, related to Tcp1p, essential protein that is required for the assembly of actin and tubulins in vivo; contains an ATP-binding motif
YFL062W	COS4	15.5	4.17867	below threshold	15.7859	4.29051	below threshold	15.2205	3.95476	below threshold	15.28	5.4	0.98	cytosol	14.64	3.02	0.94	cytosol	16.39	5.53	1.05	cytosol	Protein of unknown function, member of the DUP380 subfamily of conserved, often subtelomerically-encoded proteins
YDR117C	TMA64	15.55	3.18321	below threshold	15.7875	2.93843	below threshold	15.323	3.30454	below threshold	16.94	5.57	1.08	cytosol	16.59	3.63	1.06	cytosol	16.32	5.83	1.04	cytosol	Protein of unknown function that associates with ribosomes; has a putative RNA binding domain
YBR221C	PDB1	16.13	4.82389	below threshold	15.7927	4.84381	below threshold	16.4804	4.79248	below threshold	18.27	7.57	1.13	cytosol	25.01	5.24	1.55	cytosol	39.95	10.43	2.47	cytosol	E1 beta subunit of the pyruvate dehydrogenase (PDH) complex, which is an evolutionarily-conserved multi-protein complex found in mitochondria
YGR045C	YGR045C	15.5	3.56642	below threshold	15.7973	3.67276	below threshold	15.2147	3.42867	below threshold	16.77	6.3	1.08	cytosol	16.5	3.42	1.06	cytosol	16.41	4.67	1.05	cytosol	Dubious open reading frame unlikely to encode a protein, based on available experimental and comparative sequence data
YLR344W	RPL26A	15.24	4.29466	below threshold	15.7982	4.34234	below threshold	14.7078	4.25011	below threshold	17.16	6.62	1.12	cytosol	15.72	3.58	1.03	cytosol	15.91	2.59	1.04	cytosol	Protein component of the large (60S) ribosomal subunit, nearly identical to Rpl26Bp and has similarity to E. coli L24 and rat L26 ribosomal proteins; binds to 5.8S rRNA
YPL003W	ULA1	15.35	3.49552	below threshold	15.7986	3.66399	below threshold	14.93	3.25674	below threshold	18.63	10.81	1.21	cytosol	17.06	3.06	1.11	cytosol	18.11	5.06	1.17	cytosol	Protein that acts together with Uba3p to activate Rub1p before its conjugation to proteins (neddylation), which may play a role in protein degradation
YOR345C	YOR345C	16.19	3.73907	below threshold	15.8	3.80379	below threshold	16.6	3.59946	below threshold	18.02	6.03	1.11	cytosol	16.62	4.37	1.02	cytosol	15.54	4.06	0.95	cytosol	Dubious ORF unlikely to encode a protein, based on available experimental and comparative sequence data; overlaps the verified gene REV1; null mutant displays increased resistance to antifungal agents gliotoxin, cycloheximide and H2O2
YGR295C	COS6	15.73	3.75285	below threshold	15.8	3.8731	below threshold	15.6718	3.6452	below threshold	16.36	5.39	1.04	cytosol	17.16	3.43	1.09	cytosol	28.02	8.9	1.78	cytosol	Protein of unknown function, member of the DUP380 subfamily of conserved, often subtelomerically-encoded proteins
YHR189W	PTH1	17.57	5.41444	mitochondria	15.8022	5.48083	mitochondria	19.351	4.59434	mitochondria	17.45	6.11	0.99	mitochondria	19.46	3.97	1.1	mitochondria	18.03	4.06	1.02	mitochondria	One of two (see also PTH2) mitochondrially-localized peptidyl-tRNA hydrolases; dispensable for respiratory growth on rich medium, but required for respiratory growth on minimal medium
YBR002C	RER2	15.32	3.56586	below threshold	15.8069	3.6762	below threshold	14.8598	3.29827	below threshold	13.5	4.7	0.88	cytosol	14.34	2.65	0.93	cytosol	15.41	2.64	1	cytosol	Cis-prenyltransferase involved in dolichol synthesis; participates in endoplasmic reticulum (ER) protein sorting
YER066C-A	YER066C-A	16.11	3.75202	below threshold	15.8125	3.64162	below threshold	16.4229	3.89733	below threshold	16.36	5.5	1.01	cytosol	16.76	3.58	1.04	cytosol	15.85	3.93	0.98	cytosol	Dubious open reading frame unlikely to encode a protein, partially overlaps uncharacterized ORF YER067W
YDR010C	YDR010C	15.97	3.94622	below threshold	15.8133	3.9731	below threshold	16.1312	3.92719	below threshold	15.65	5.69	0.97	cytosol	16.9	3.3	1.05	cytosol	17.43	6.26	1.09	cytosol	Dubious open reading frame unlikely to encode a protein, based on available experimental and comparative sequence data
YOR190W	SPR1	14.23	3.85997	below threshold	15.8241	3.80554	below threshold	12.6578	2.91032	below threshold	16.11	7.06	1.13	cytosol	15.99	3.06	1.12	cytosol	17.45	4.02	1.22	cytosol	Sporulation-specific exo-1,3-beta-glucanase; contributes to ascospore thermoresistance
YNR002C	ATO2	15.45	3.97055	below threshold	15.8241	3.78185	below threshold	15.0894	4.05357	below threshold	14.65	4.66	0.94	cytosol	13.89	3.01	0.89	cytosol	17.23	5.23	1.11	cytosol	Putative transmembrane protein involved in export of ammonia, a starvation signal that promotes cell death in aging colonies; phosphorylated in mitochondria; member of the TC 9.B.33 YaaH family; homolog of Ady2p and Y. lipolytica Gpr1p
YFR035C	YFR035C	15.64	3.74983	below threshold	15.8249	3.78322	below threshold	15.4634	3.7152	below threshold	17.09	5.94	1.09	cytosol	17.17	3.63	1.09	cytosol	16.73	7.06	1.06	cytosol	Putative protein of unknown function, deletion mutant exhibits synthetic phenotype with alpha-synuclein
YCL040W	GLK1	15.55	3.56418	below threshold	15.8263	3.55705	below threshold	15.2879	3.54634	below threshold	19.71	6.75	1.26	cytosol	16.8	3.08	1.08	cytosol	16.98	3.39	1.09	cytosol	Glucokinase, catalyzes the phosphorylation of glucose at C6 in the first irreversible step of glucose metabolism; one of three glucose phosphorylating enzymes; expression regulated by non-fermentable carbon sources
YLR407W	YLR407W	16.88	2.95167	below threshold	15.8267	2.51708	below threshold	17.9588	2.95864	below threshold	18	5.96	1.06	cytosol	14.83	2.41	0.87	cytosol	16.43	4.8	0.97	cytosol	Putative protein of unknown function; null mutant displays elongated buds and a large fraction of budded cells have only one nucleus
YIL172C	YIL172C	15.75	3.61186	below threshold	15.8281	3.75708	below threshold	15.6948	3.41565	below threshold	18.39	7.73	1.16	cytosol	17.65	3.8	1.11	cytosol	16.39	3.1	1.04	cytosol	Putative protein of unknown function with similarity to glucosidases; green fluorescent protein (GFP)-fusion protein localizes to the cytoplasm
YDR467C	YDR467C	15.59	3.83296	below threshold	15.8284	2.82634	below threshold	15.3682	4.52832	below threshold	15.41	6.43	0.98	cytosol	17.22	3.83	1.1	cytosol	16.39	4.22	1.05	cytosol	Dubious open reading frame unlikely to encode a functional protein, based on available experimental and comparative sequence data
YFL015C	YFL015C	16.48	4.21553	below threshold	15.8322	4.79688	below threshold	17.1461	3.47008	below threshold	14.2	4.85	0.86	cytosol	15.65	3.75	0.94	cytosol	16.97	4.95	1.02	cytosol	Dubious open reading frame unlikely to encode a protein; partially overlaps dubious ORF YFL015W-A; YFL015C is not an essential gene
YLR029C	RPL15A	16.28	3.45729	below threshold	15.8377	3.01977	below threshold	16.7417	3.80226	below threshold	19.09	5.81	1.17	cytosol	14.68	2.45	0.9	cytosol	20.27	6.13	1.24	cytosol	Protein component of the large (60S) ribosomal subunit, nearly identical to Rpl15Bp and has similarity to rat L15 ribosomal protein; binds to 5.8 S rRNA
YPL146C	NOP53	15.02	3.48844	below threshold	15.8377	3.78108	below threshold	14.2248	2.79486	below threshold	16.43	5.32	1.09	cytosol	16.7	2.67	1.11	cytosol	17.05	4.5	1.13	cytosol	Nucleolar protein; involved in biogenesis of the 60S subunit of the ribosome; interacts with rRNA processing factors Cbf5p and Nop2p; null mutant is viable but growth is severely impaired
YNL089C	YNL089C	16.91	3.39009	below threshold	15.8443	2.77333	below threshold	17.982	3.53289	below threshold	15.52	6	0.91	cytosol	16.08	2.86	0.95	cytosol	14.11	2.66	0.83	cytosol	Dubious open reading frame unlikely to encode a functional protein; almost completely overlaps YNL090W/RHO2 which encodes a small GTPase of the Rho/Rac subfamily of Ras-like proteins
YIL173W	VTH1	16.61	4.25368	punctate	15.8461	4.51287	punctate	17.3986	3.84429	punctate	19.19	5.9	1.15	punctate	17.9	4.25	1.07	punctate	16.36	6.56	0.98	punctate	Putative membrane glycoprotein with strong similarity to Vth2p and Pep1p/Vps10p, may be involved in vacuolar protein sorting
YBR033W	EDS1	16.35	3.66079	below threshold	15.8467	3.2495	below threshold	16.8676	4.22163	below threshold	14.22	5.13	0.86	cytosol	14.76	2.84	0.9	cytosol	14.62	3.65	0.89	cytosol	Putative zinc cluster protein; YBR033W is not an essential gene
YML108W	YML108W	15.5	3.62467	below threshold	15.8493	3.81879	below threshold	15.1612	3.35598	below threshold	17.11	5.48	1.1	cytosol	17.48	3.83	1.12	cytosol	16.11	5.6	1.03	cytosol	Putative protein of unknown function whose structure defines a new subfamily of the split beta-alpha-beta sandwiches; green fluorescent protein (GFP)-fusion protein localizes to the cytoplasm and nucleus; YML108W is not an essential gene
YGR186W	TFG1	15.74	4.2113	below threshold	15.8496	3.04482	below threshold	15.6491	4.33971	below threshold	17.28	7.46	1.09	cytosol	19.47	3.63	1.23	cytosol	14.74	2.63	0.93	cytosol	TFIIF (Transcription Factor II) largest subunit; involved in both transcription initiation and elongation of RNA polymerase II; homologous to human RAP74
YGL205W	POX1	15.97	3.79819	below threshold	15.8501	3.23146	below threshold	16.0936	3.96424	below threshold	18.61	6.12	1.16	cytosol	21.94	4.44	1.37	cytosol	16.7	4.33	1.04	cytosol	Fatty-acyl coenzyme A oxidase, involved in the fatty acid beta-oxidation pathway; localized to the peroxisomal matrix
YJL012C	VTC4	15.61	4.93537	below threshold	15.852	5.0085	below threshold	15.3812	4.83956	below threshold	14.6	5.31	0.93	cytosol	14.89	3.01	0.95	cytosol	20.11	5.59	1.28	cytosol	Vacuolar membrane polyphosphate polymerase; subunit of the vacuolar transporter chaperone (VTC) complex involved in synthesis and transfer of polyP to the vacuole; regulates membrane trafficking; role in non-autophagic vacuolar fusion
YNL339C	YRF1-6	17	3.8725	below threshold	15.8523	3.32793	below threshold	18.1594	3.88845	below threshold	15.72	5	0.92	cytosol	17.51	3.93	1.02	cytosol	16.14	2.87	0.94	cytosol	Helicase encoded by the Y' element of subtelomeric regions, highly expressed in the mutants lacking the telomerase component TLC1; potentially phosphorylated by Cdc28p
YOR082C	YOR082C	15.64	3.81448	below threshold	15.8611	3.4593	below threshold	15.4429	4.05128	below threshold	16.41	5.51	1.04	cytosol	16.85	3.5	1.07	cytosol	15.7	3.02	1	cytosol	Dubious open reading frame unlikely to encode a protein, based on experimental and comparative sequence data; partially overlaps the verified gene YOR083W
YPR203W	YPR203W	16.04	4.08958	below threshold	15.8636	3.6064	below threshold	16.2245	4.62443	below threshold	15.67	5.82	0.97	cytosol	16.97	3.18	1.05	cytosol	15.82	4.5	0.98	cytosol	Putative protein of unknown function
YPR139C	VPS66	14.37	4.03009	below threshold	15.8644	3.89998	below threshold	12.8828	3.69438	below threshold	14.74	5.11	1.02	cytosol	14.56	2.84	1.01	cytosol	18.66	3.71	1.29	cytosol	Cytoplasmic protein of unknown function involved in vacuolar protein sorting.
YMR144W	YMR144W	14.25	3.44096	below threshold	15.8684	3.46295	below threshold	12.6458	2.83555	below threshold	14.23	4.69	0.99	cytosol	16.18	3.91	1.13	cytosol	18.09	7.88	1.26	cytosol	Putative protein of unknown function; localized to the nucleus; YMR144W is not an essential gene
YOL106W	YOL106W	15.96	3.84509	below threshold	15.8702	3.64052	below threshold	16.062	4.00713	below threshold	16.11	5.11	1	cytosol	17.81	4.63	1.11	cytosol	16.37	3.96	1.02	cytosol	Dubious open reading frame unlikely to encode a functional protein, based on available experimental and comparative sequence data
YDR340W	YDR340W	16.41	4.17226	below threshold	15.8714	3.65585	below threshold	16.9554	4.47674	below threshold	17.84	5.82	1.08	cytosol	15.94	3.5	0.97	cytosol	15.09	3.16	0.91	cytosol	Putative protein of unknown function
YJL225C	YJL225C	15.55	3.96782	below threshold	15.8735	4.46289	below threshold	15.2401	3.6638	below threshold	16.05	5.24	1.03	cytosol	18.46	3.18	1.18	cytosol	17.04	3.45	1.09	cytosol	Putative protein of unknown function; similarity to DNA helicases that are also encoded within subtelomeric Y' elements and induced in telomerase deficient survivors
YOL053W	AIM39	15.53	3.33043	below threshold	15.8752	3.23887	below threshold	15.2037	3.34607	below threshold	16.74	5.26	1.07	cytosol	18.08	3.41	1.16	cytosol	27.55	6.7	1.77	cytosol	Putative protein of unknown function; null mutant displays elevated frequency of mitochondrial genome loss
YEL076C	YEL076C	17.05	3.28173	below threshold	15.8778	3.31149	below threshold	18.2372	2.65118	below threshold	15.66	5.8	0.91	cytosol	14.07	2.28	0.82	cytosol	15.73	1.98	0.92	cytosol	Putative protein of unknown function
YDR260C	SWM1	16.67	3.2077	below threshold	15.8807	3.60084	below threshold	17.4637	2.47815	below threshold	14.42	5.46	0.86	cytosol	15.52	3.14	0.93	cytosol	15.28	2.53	0.91	cytosol	Subunit of the anaphase-promoting complex, which is an E3 ubiquitin ligase that regulates the metaphase-anaphase transition and exit from mitosis; required for activation of the daughter-specific gene expression and spore wall maturation
YEL010W	YEL010W	15.66	4.20084	below threshold	15.8843	3.73218	below threshold	15.4564	4.52367	below threshold	16.26	6.21	1.03	cytosol	17.28	3.76	1.1	cytosol	16.23	5.37	1.03	cytosol	Dubious open reading frame unlikely to encode a functional protein, based on available experimental and comparative sequence data
YGR032W	GSC2	15.82	4.40546	below threshold	15.8844	4.88865	below threshold	15.7629	4.14621	below threshold	28.7	11.27	1.81	cytosol	17.48	3.23	1.1	cytosol	23.15	5.99	1.46	cytosol	Catalytic subunit of 1,3-beta-glucan synthase, involved in formation of the inner layer of the spore wall; activity positively regulated by Rho1p and negatively by Smk1p; has similarity to an alternate catalytic subunit, Fks1p (Gsc1p)
YPL201C	YIG1	15.83	3.75194	below threshold	15.8877	3.92915	below threshold	15.7962	3.43114	below threshold	16.51	6.12	1.04	cytosol	17.23	3.6	1.08	cytosol	16.95	3.94	1.06	cytosol	Protein that interacts with glycerol 3-phosphatase and plays a role in anaerobic glycerol production; localizes to the nucleus and cytosol
YOR079C	ATX2	15.11	3.89831	below threshold	15.8889	3.86516	below threshold	14.3513	3.83526	below threshold	16.21	7.21	1.07	cytosol	15.67	2.63	1.03	cytosol	17.3	5.98	1.14	cytosol	Golgi membrane protein involved in manganese homeostasis; overproduction suppresses the sod1 (copper, zinc superoxide dismutase) null mutation
YGL124C	MON1	15.82	3.42808	below threshold	15.8909	3.376	below threshold	15.7514	3.47547	below threshold	16.09	5.72	1.01	cytosol	17.55	3.93	1.1	cytosol	19.41	7.39	1.22	cytosol	Protein required for fusion of cvt-vesicles and autophagosomes with the vacuole; associates, as a complex with Ccz1p, with a perivacuolar compartment; potential Cdc28p substrate
YIR042C	YIR042C	17.69	4.17357	below threshold	15.8913	3.96443	below threshold	19.5022	3.74407	cytosol	18.38	6.73	1.03	cytosol	14.45	3.19	0.81	cytosol	15.78	3.33	0.89	cytosol	Putative protein of unknown function; YIR042C is a non-essential gene
YHR016C	YSC84	15.79	3.8255	below threshold	15.8971	2.95636	below threshold	15.6971	4.41001	below threshold	18.63	5.73	1.17	cytosol	16.25	2.59	1.02	cytosol	17.29	4.05	1.09	cytosol	Actin-binding protein involved in bundling of actin filaments and endocytosis of actin cortical patches; activity stimulated by Las17p; contains SH3 domain similar to Rvs167p
YGR069W	YGR069W	17.14	4.22285	below threshold	15.9	4.14879	below threshold	18.4094	4.05776	below threshold	14.78	5.22	0.86	cytosol	17.05	3.99	0.99	cytosol	16.1	4.72	0.93	cytosol	Dubious open reading frame unlikely to encode a protein, based on available experimental and comparative sequence data
YFR054C	YFR054C	16.68	3.71498	below threshold	15.9016	3.72526	below threshold	17.4686	3.55912	below threshold	15.15	6.08	0.9	cytosol	17.46	3.91	1.04	cytosol	17.28	4.29	1.03	cytosol	Dubious open reading frame unlikely to encode a functional protein, based on available experimental and comparative sequence data
YLR329W	REC102	16.32	4.23187	below threshold	15.9034	3.97938	below threshold	16.7531	4.69027	below threshold	15.83	5.53	0.96	cytosol	15.62	3.77	0.95	cytosol	17.24	3.7	1.05	cytosol	Protein involved in early stages of meiotic recombination; required for chromosome synapsis; forms a complex with Rec104p and Spo11p necessary during the initiation of recombination
YER091C-A	YER091C-A	15.28	4.61739	below threshold	15.9079	4.49971	below threshold	14.6684	4.63854	below threshold	16.96	5.48	1.1	cytosol	16.25	3.21	1.06	cytosol	16.13	2.79	1.05	cytosol	Dubious open reading frame unlikely to encode a protein, based on available experimental and comparative sequence data
YFR019W	FAB1	14.57	4.6503	below threshold	15.908	4.85612	below threshold	13.2404	4.14498	below threshold	13.54	5.32	0.92	cytosol	17.43	3.75	1.19	cytosol	15.84	4.54	1.08	cytosol	1-phosphatidylinositol-3-phosphate 5-kinase; vacuolar membrane kinase that generates phosphatidylinositol (3,5)P2, which is involved in vacuolar sorting and homeostasis
YDL180W	YDL180W	15.64	4.0195	below threshold	15.9111	4.45827	below threshold	15.3885	3.75564	below threshold	15.23	4.88	0.97	cytosol	15.63	4.01	0.99	cytosol	23.95	7.11	1.53	cytosol	Putative protein of unknown function; green fluorescent protein (GFP)-fusion protein localizes to the vacuole
YJL081C	ARP4	16.12	3.6649	below threshold	15.9117	3.7889	below threshold	16.3457	3.58527	below threshold	17.67	6.29	1.09	cytosol	17	3.3	1.05	cytosol	15.6	6.88	0.96	cytosol	Nuclear actin-related protein involved in chromatin remodeling, component of chromatin-remodeling enzyme complexes
YLR043C	TRX1	14.89	3.90144	below threshold	15.9161	4.13111	below threshold	13.8814	3.25256	below threshold	14.98	4.81	1	cytosol	14.08	2.74	0.94	cytosol	16.24	5.33	1.09	cytosol	Cytoplasmic thioredoxin isoenzyme of the thioredoxin system which protects cells against oxidative and reductive stress, forms LMA1 complex with Pbi2p, acts as a cofactor for Tsa1p, required for ER-Golgi transport and vacuole inheritance
YGL104C	VPS73	14.02	4.57058	below threshold	15.9184	4.43465	below threshold	12.1441	4.11213	below threshold	14.17	5.82	1.01	cytosol	13.79	2.64	0.98	cytosol	17.24	6.17	1.22	cytosol	Mitochondrial protein; mutation affects vacuolar protein sorting; putative transporter; member of the sugar porter family
YOR003W	YSP3	15.55	3.86555	below threshold	15.9216	3.91171	below threshold	15.2016	3.83064	below threshold	17.84	6.84	1.14	cytosol	16.96	3.75	1.09	cytosol	13.47	2.99	0.86	cytosol	Putative precursor to the subtilisin-like protease III
YBL030C	PET9	14.24	4.48496	below threshold	15.9225	4.50722	below threshold	12.5701	3.95628	below threshold	15.54	5.08	1.09	cytosol	13.47	2.85	0.94	cytosol	16.05	5.13	1.12	cytosol	Major ADP/ATP carrier of the mitochondrial inner membrane, exchanges cytosolic ADP for mitochondrially synthesized ATP; phosphorylated; required for viability in many common lab strains carrying a mutation in the polymorphic SAL1 gene
YPL271W	ATP15	16.3	4.65003	below threshold	15.9242	5.13091	below threshold	16.7042	4.08766	below threshold	15.55	5.29	0.95	cytosol	14.41	2.89	0.88	cytosol	16.76	6.08	1.02	cytosol	Epsilon subunit of the F1 sector of mitochondrial F1F0 ATP synthase, which is a large, evolutionarily conserved enzyme complex required for ATP synthesis; phosphorylated
YDL027C	YDL027C	14.41	4.05204	below threshold	15.9247	4.37931	below threshold	12.9144	3.37389	below threshold	17.3	7.01	1.2	cytosol	15.96	2.75	1.1	cytosol	17.57	2.78	1.21	cytosol	Putative protein of unknown function; the authentic, non-tagged protein is detected in highly purified mitochondria in high-throughput studies; YDL027C is not an essential gene
YDR479C	PEX29	15.52	3.55412	below threshold	15.9248	3.54921	below threshold	15.1233	3.56621	below threshold	17.55	5.96	1.13	cytosol	15.98	3.24	1.02	cytosol	17.45	3.48	1.12	cytosol	Peroxisomal integral membrane peroxin, involved in the regulation of peroxisomal size, number and distribution; genetic interactions suggest that Pex28p and Pex29p act at steps upstream of those mediated by Pex30p, Pex31p, and Pex32p
YPR136C	YPR136C	17.04	3.79613	below threshold	15.9249	4.15843	below threshold	18.1667	3.3121	below threshold	15.68	8.16	0.92	cytosol	17.2	3.95	1	cytosol	15.37	4.99	0.9	cytosol	Dubious open reading frame unlikely to encode a protein, based on available experimental and comparative sequence data; partially overlaps verified ORF RRP9
YGR001C	AML1	13.9	3.33718	below threshold	15.9283	2.77579	below threshold	11.8817	3.09302	below threshold	16.07	4.64	1.15	cytosol	15.48	3.07	1.11	cytosol	18.34	3.01	1.31	cytosol	Putative protein of unknown function with similarity to methyltransferase family members; green fluorescent protein (GFP)-fusion protein localizes to the cytoplasm; required for replication of Brome mosaic virus in S. cerevisiae
YKL088W	CAB3	15.47	3.77117	below threshold	15.9326	3.44717	below threshold	15.0234	3.94337	below threshold	17.98	5.73	1.16	cytosol	16.36	3.33	1.05	cytosol	16.87	5.68	1.09	cytosol	Subunit of a phosphopantothenoylcysteine decarboxylase (PPCDC; Cab3p, Sis2p, Vhs3p) complex, which catalyzes the third step of coenzyme A biosynthesis; null mutant lethality is complemented by E. coli coaBC
YPL056C	LCL1	15.69	4.31277	below threshold	15.9338	4.50018	below threshold	15.4547	4.18261	below threshold	18.06	8.43	1.15	cytosol	15.53	2.79	0.99	cytosol	16.02	3.29	1.02	cytosol	Putative protein of unknown function; deletion mutant is fluconazole resistant
YGR059W	SPR3	16.48	3.35607	below threshold	15.9355	3.45907	below threshold	17.0324	3.05594	below threshold	17.34	6.55	1.05	cytosol	17.83	3.32	1.08	cytosol	17.2	3.06	1.04	cytosol	Sporulation-specific homolog of the yeast CDC3/10/11/12 family of bud neck microfilament genes; septin protein involved in sporulation; regulated by ABFI
YLR053C	YLR053C	16.13	4.17487	below threshold	15.9385	4.13998	below threshold	16.3341	4.15345	below threshold	17.38	7.43	1.07	cytosol	18.19	3.61	1.12	cytosol	25.08	4.9	1.55	nucleus	Putative protein of unknown function
YBL054W	TOD6	16.23	3.53458	below threshold	15.9387	2.88392	below threshold	16.5491	3.86493	below threshold	16.87	7	1.03	cytosol	14.82	2.23	0.91	cytosol	13.17	1.99	0.81	cytosol	PAC motif binding protein involved in rRNA and ribosome biogenesis; subunit of the RPD3L histone deacetylase complex; Myb-like HTH transcription factor, similar to Dot6p; hypophosphorylated by rapamycin treatment in a Sch9p-dependent manne
YFL055W	AGP3	16.39	4.35098	below threshold	15.9406	4.29853	below threshold	16.8554	4.3362	below threshold	14.64	4.91	0.89	cytosol	16.47	3.4	1	cytosol	21.28	9.52	1.29	cytosol	Low-affinity amino acid permease, may act to supply the cell with amino acids as nitrogen source in nitrogen-poor conditions; transcription is induced under conditions of sulfur limitation; plays a role in regulating Ty1 transposition
YDL228C	YDL228C	16.39	3.68895	below threshold	15.9438	4.0555	below threshold	16.855	3.35856	below threshold	18.78	6.46	1.14	cytosol	NA	NA	NA	cytosol	16.3	4.71	0.99	cytosol	Dubious open reading frame unlikely to encode a protein, based on available experimental and comparative sequence data; almost completely overlaps the verified gene SSB1
YPR062W	FCY1	17.17	3.3755	below threshold	15.9468	3.11541	below threshold	18.4193	3.38904	below threshold	15.65	4.99	0.91	cytosol	17.11	3.68	0.99	cytosol	17.81	6.22	1.03	cytosol	Cytosine deaminase, zinc metalloenzyme that catalyzes the hydrolytic deamination of cytosine to uracil; of biomedical interest because it also catalyzes the deamination of 5-fluorocytosine (5FC) to form anticancer drug 5-fluorouracil (5FU)
YLR099W-A	YLR099W-A	16.08	4.40059	below threshold	15.9478	4.087	below threshold	16.2383	4.53781	below threshold	15.63	5.87	0.97	cytosol	15.27	4.22	0.94	cytosol	14.08	3.72	0.87	cytosol	Putative protein of unknown function
YAR075W	YAR075W	16.57	3.38536	below threshold	15.95	3.42287	below threshold	17.2066	3.33105	below threshold	14.91	5.39	0.89	cytosol	17.7	3.61	1.06	cytosol	17.84	7.3	1.07	cytosol	Non-functional protein with homology IMP dehydrogenase; YAR073W/IMD1 and YAR075W comprise a continuous reading frame in some strains of S. cerevisiae.
YDR323C	PEP7	16.86	4.28608	punctate	15.95	4.24725	punctate	17.7718	4.19159	punctate	18.85	5.03	1.11	punctate	19.61	3.35	1.16	punctate	21.22	2.72	1.25	punctate	Multivalent adaptor protein that facilitates vesicle-mediated vacuolar protein sorting by ensuring high-fidelity vesicle docking and fusion, which are essential for targeting of vesicles to the endosome; required for vacuole inheritance
YDR085C	AFR1	15.8	3.16042	below threshold	15.9503	3.32821	below threshold	15.6541	2.88946	below threshold	17.47	5.65	1.1	cytosol	14.79	3.64	0.93	cytosol	16.96	4.13	1.07	cytosol	Protein required for pheromone-induced projection (shmoo) formation; regulates septin architecture during mating; has an RVXF motif that mediates targeting of Glc7p to mating projections; interacts with Cdc12p
YLR008C	PAM18	16.81	3.45043	below threshold	15.9516	3.31702	below threshold	17.6799	3.36236	below threshold	14.8	6.13	0.88	cytosol	15.93	3.36	0.94	cytosol	15.69	2.92	0.93	cytosol	Constituent of the import motor (PAM complex) component of the Translocase of the Inner Mitochondrial membrane (TIM23 complex); essential J-protein cochaperone that stimulates Ssc1p ATPase activity to drive import; inhibited by Pam16p
YGL188C	YGL188C	16.33	4.11561	below threshold	15.9601	3.71012	below threshold	16.7107	4.27862	below threshold	16.41	5.94	1	cytosol	16.18	2.57	0.99	cytosol	15.64	3.35	0.95	cytosol	Dubious open reading frame unlikely to encode a functional protein, based on available experimental and comparative sequence data
YIL120W	QDR1	16.19	4.67571	below threshold	15.9663	5.17471	below threshold	16.4362	3.77602	below threshold	15.22	5.11	0.93	cytosol	15.87	2.99	0.97	cytosol	16.93	3.81	1.04	cytosol	Multidrug transporter of the major facilitator superfamily, required for resistance to quinidine, ketoconazole, fluconazole, and barban
YMR178W	YMR178W	15.92	4.63437	below threshold	15.968	4.33448	below threshold	15.8823	4.83168	below threshold	18.24	6.63	1.14	cytosol	17.15	3.97	1.07	cytosol	20.14	4.63	1.26	cytosol	Putative protein of unknown function; green fluorescent protein (GFP)-fusion protein localizes to both the cytoplasm and nucleus and is induced in response to the DNA-damaging agent MMS; YMR178W is not an essential gene
YLR260W	LCB5	15.79	3.36253	below threshold	15.9683	3.42247	below threshold	15.6376	3.32873	below threshold	17.84	7.01	1.12	cytosol	17.57	3.08	1.11	cytosol	12.61	3.32	0.79	cytosol	Minor sphingoid long-chain base kinase, paralog of Lcb4p responsible for few percent of the total activity, possibly involved in synthesis of long-chain base phosphates, which function as signaling molecules
YNR005C	YNR005C	16.05	3.61109	below threshold	15.9686	3.76445	below threshold	16.1471	3.50588	below threshold	16.43	4.96	1.02	cytosol	15.77	3.3	0.98	cytosol	17.97	3.81	1.11	cytosol	Dubious open reading frame unlikely to encode a functional protein, based on available experimental and comparative sequence data
YKR039W	GAP1	15.58	4.69247	below threshold	15.9725	4.75662	below threshold	15.1968	4.58837	below threshold	15.36	4.06	0.98	cytosol	16.25	3.2	1.04	cytosol	16.79	6.97	1.07	cytosol	General amino acid permease; localization to the plasma membrane is regulated by nitrogen source
YHR071W	PCL5	17.12	3.39744	below threshold	15.9756	2.93506	below threshold	18.2857	3.30226	below threshold	17.31	6.67	1.01	cytosol	15.6	3.07	0.91	cytosol	14.87	2.87	0.86	cytosol	Cyclin, interacts with and phosphorylated by Pho85p cyclin-dependent kinase (Cdk), induced by Gcn4p at level of transcription, specifically required for Gcn4p degradation, may be sensor of cellular protein biosynthetic capacity
YCR075C	ERS1	15.33	4.53098	below threshold	15.976	4.82611	below threshold	14.7056	4.2348	below threshold	16.45	4.93	1.07	cytosol	13.74	2.87	0.89	cytosol	22.36	7.32	1.45	cytosol	Protein with similarity to human cystinosin, which is a H(+)-driven transporter involved in L-cystine export from lysosomes and implicated in the disease cystinosis; contains seven transmembrane domains
YJL160C	YJL160C	16.61	3.8395	below threshold	15.9785	4.1423	below threshold	17.2602	3.45791	below threshold	14.13	5.2	0.85	cytosol	14.27	2.66	0.85	cytosol	16.84	2.38	1.01	cytosol	Putative protein of unknown function; member of the PIR (proteins with internal repeats) family of cell wall proteins; non-essential gene that is required for sporulation; mRNA is weakly cell cycle regulated, peaking in mitosis
YNL310C	ZIM17	16.4	3.71062	below threshold	15.9827	3.95563	below threshold	16.8307	3.40914	below threshold	17.98	6.6	1.09	cytosol	15.38	2.85	0.93	cytosol	19.52	3.99	1.19	cytosol	Heat shock protein with a zinc finger motif; essential for protein import into mitochondria; may act with Pam18p to facilitate recognition and folding of imported proteins by Ssc1p (mtHSP70) in the mitochondrial matrix
YGL198W	YIP4	14.63	4.22996	below threshold	15.9838	4.37439	below threshold	13.2822	3.73241	below threshold	14.82	6.06	1.01	cytosol	13.96	3.08	0.95	cytosol	17.87	8.43	1.22	cytosol	Protein that interacts with Rab GTPases, localized to late Golgi vesicles; computational analysis of large-scale protein-protein interaction data suggests a possible role in vesicle-mediated transport
YDL242W	YDL242W	15.53	3.77583	below threshold	15.9857	3.36058	below threshold	15.0841	4.12577	below threshold	17.37	5.39	1.11	cytosol	18.03	5.11	1.16	cytosol	16.13	4.43	1.03	cytosol	Dubious open reading frame unlikely to encode a protein, based on available experimental and comparative sequence data
YDR011W	SNQ2	15.52	3.65925	below threshold	15.991	3.61655	below threshold	15.0645	3.64948	below threshold	17.69	5.83	1.13	cytosol	15.2	3.38	0.97	cytosol	14.6	5.42	0.94	cytosol	Plasma membrane ATP-binding cassette (ABC) transporter, multidrug transporter involved in multidrug resistance and resistance to singlet oxygen species
YKR035C	OPI8	15.18	3.74411	below threshold	15.9911	3.96157	below threshold	14.3843	3.2706	below threshold	16.89	7.14	1.11	cytosol	14.18	2.69	0.93	cytosol	18.19	10.42	1.19	cytosol	Dubious open reading frame unlikely to encode a protein, based on available experimental and comparative sequence data; partially overlaps verified gene DID2/YKR035W-A
YBR013C	YBR013C	16.7	3.11537	below threshold	15.9934	3.15879	below threshold	17.4161	2.92384	below threshold	16.37	5.58	0.98	cytosol	15.12	2.77	0.9	cytosol	17.03	6.25	1.01	cytosol	Putative protein of unknown function, haploid deletion mutant exhibits synthetic phenotype with alpha-synuclein
YML084W	YML084W	14.74	3.88957	below threshold	15.9944	3.89408	below threshold	13.4934	3.64772	below threshold	17.58	5.8	1.19	cytosol	16.39	3.51	1.11	cytosol	15.05	6.06	1.02	cytosol	Dubious open reading frame unlikely to encode a protein, based on available experimental and comparative sequence data
YJR122W	IBA57	16.16	3.31694	below threshold	15.9945	3.27037	below threshold	16.3317	3.33854	below threshold	17.55	5.93	1.08	cytosol	16.05	3.57	0.99	cytosol	18.17	3.16	1.12	cytosol	Mitochondrial matrix protein involved in the incorporation of iron-sulfur clusters into mitochondrial aconitase-type proteins; activates the radical-SAM family members Bio2p and Lip5p; interacts with Ccr4p in the two-hybrid system
YER065C	ICL1	14.96	3.36284	below threshold	15.9947	2.89124	below threshold	13.9366	3.42073	below threshold	17.76	5.83	1.18	cytosol	16.06	2.63	1.07	cytosol	18.46	5.41	1.23	cytosol	Isocitrate lyase, catalyzes the formation of succinate and glyoxylate from isocitrate, a key reaction of the glyoxylate cycle; expression of ICL1 is induced by growth on ethanol and repressed by growth on glucose
YLR394W	CST9	15.93	3.58229	below threshold	15.9953	3.49737	below threshold	15.8779	3.66383	below threshold	17.23	5.4	1.08	cytosol	16.39	3.08	1.02	cytosol	14.54	4.54	0.91	cytosol	SUMO E3 ligase; required for synaptonemal complex formation; localizes to synapsis initiation sites on meiotic chromosomes; potential Cdc28p substrate
YKL179C	COY1	16.28	3.98013	below threshold	15.9985	4.48753	below threshold	16.5809	3.10367	below threshold	19.17	7.08	1.17	cytosol	21.3	3.65	1.3	cytosol	15.36	6.47	0.94	cytosol	Golgi membrane protein with similarity to mammalian CASP; genetic interactions with GOS1 (encoding a Golgi snare protein) suggest a role in Golgi function
YBL025W	RRN10	14.96	3.99325	below threshold	15.9996	4.15771	below threshold	13.932	3.65061	below threshold	15.99	5.72	1.06	cytosol	16.94	2.96	1.13	cytosol	27.27	10.63	1.82	cytosol	Protein involved in promoting high level transcription of rDNA, subunit of UAF (upstream activation factor) for RNA polymerase I
YDL151C	BUD30	16.41	3.63924	below threshold	16	3.51994	below threshold	16.8384	3.85185	below threshold	16.32	6.23	0.99	cytosol	17.54	4.38	1.06	cytosol	17.6	3.47	1.07	cytosol	Dubious open reading frame, unlikely to encode a protein; not conserved in closely related Saccharomyces species; 96% of ORF overlaps the verified gene RPC53; diploid mutant displays a weak budding pattern phenotype in a systematic assay
YPL120W	VPS30	15.41	3.84656	below threshold	16.006	4.15305	below threshold	14.8333	3.60004	below threshold	14.55	4.36	0.94	cytosol	13.89	3.27	0.9	cytosol	24.92	6.69	1.61	cytosol	Subunit of phosphatidylinositol (PtdIns) 3-kinase complexes I and II; Complex I is essential in autophagy and Complex II is required for vacuolar protein sorting; ortholog of the higher eukaryotic gene Beclin 1
YDR440W	DOT1	15.21	3.7376	below threshold	16.0063	3.70731	below threshold	14.4355	3.65055	below threshold	17.17	5.58	1.12	cytosol	16.8	3.29	1.1	cytosol	16	4.17	1.05	cytosol	Nucleosomal histone H3-Lys79 methylase; methylation is required for telomeric silencing, meiotic checkpoint control, and DNA damage response
YKL194C	MST1	15.94	3.59004	below threshold	16.0086	3.36983	below threshold	15.8805	3.71281	below threshold	16.48	8.53	1.03	cytosol	18.47	3.36	1.15	cytosol	15.64	2.61	0.98	cytosol	Mitochondrial threonyl-tRNA synthetase
YLR086W	SMC4	15.66	3.73544	below threshold	16.0096	4.33819	below threshold	15.323	2.61117	below threshold	15.66	6.19	1	cytosol	18.24	4.21	1.16	cytosol	14.65	3.4	0.93	cytosol	Subunit of the condensin complex; reorganizes chromosomes during cell division; forms a complex with Smc2p that has ATP-hydrolyzing and DNA-binding activity; required for tRNA gene clustering at the nucleolus; potential Cdc28p substrate
YIL127C	RRT14	17.45	4.06739	nucleus	16.0103	3.38787	nucleus	18.9083	4.57933	nucleus	17.48	7.01	1	nucleus	13.73	2.17	0.78	nucleus	15.76	3.02	0.9	nucleus	Putative protein of unknown function; identified in a screen for mutants with decreased levels of rDNA transcription; green fluorescent protein (GFP)-fusion protein localizes to the nucleolus; predicted to be involved in ribosome biogenesis
YPR137W	RRP9	15.74	3.67984	below threshold	16.0118	3.73186	below threshold	15.4722	3.5991	below threshold	17.07	6	1.08	cytosol	17.94	4.58	1.13	cytosol	14.98	3.99	0.95	cytosol	Protein involved in pre-rRNA processing, associated with U3 snRNP; component of small ribosomal subunit (SSU) processosome; ortholog of the human U3-55k protein
YJL036W	SNX4	14.27	4.18569	below threshold	16.0128	4.09241	below threshold	12.5305	3.68441	below threshold	16.55	6.22	1.16	cytosol	16.23	3.05	1.13	cytosol	14.91	3.88	1.04	cytosol	Sorting nexin, involved in retrieval of late-Golgi SNAREs from post-Golgi endosomes to the trans-Golgi network and in cytoplasm to vacuole transport; contains a PX phosphoinositide-binding domain; forms complexes with Snx41p and with Atg20p
YOR341W	RPA190	16.57	3.47031	below threshold	16.0161	3.14653	below threshold	17.1439	3.60792	below threshold	15.89	6.66	0.95	cytosol	18.65	4.58	1.12	cytosol	16.07	2.81	0.96	cytosol	RNA polymerase I subunit; largest subunit of RNA polymerase I
YMR111C	YMR111C	15.59	3.39825	below threshold	16.0189	3.10136	below threshold	15.1745	3.42168	below threshold	18.89	6.06	1.21	cytosol	17.87	3.54	1.14	cytosol	17.03	2.53	1.09	cytosol	Protein of unknown function; green fluorescent protein (GFP)-fusion protein localizes to the nucleus; YMR111C is not an essential gene
YDR231C	COX20	17.5	3.84913	below threshold	16.019	2.5715	below threshold	19.0078	3.98567	below threshold	18.02	6.54	1.02	cytosol	13.91	2.66	0.79	cytosol	16.79	3.27	0.95	cytosol	Mitochondrial inner membrane protein, required for proteolytic processing of Cox2p and its assembly into cytochrome c oxidase
YDR355C	YDR355C	15.73	4.34893	below threshold	16.0213	4.50053	below threshold	15.4469	4.16092	below threshold	16.35	5.56	1.03	cytosol	16.46	3.48	1.04	cytosol	14.2	3.25	0.9	cytosol	Dubious: Dubious open reading frame unlikely to encode a protein, based on available experimental and comparative sequence data; partially overlaps the verified essential ORF SPC110/YDR356W
YHR173C	YHR173C	16.76	3.79985	below threshold	16.0217	3.4677	below threshold	17.5109	3.9924	below threshold	15.32	5.68	0.91	cytosol	16.24	2.61	0.96	cytosol	16.65	3.48	0.99	cytosol	Dubious ORF unlikely to encode a functional protein, based on available experimental and comparative sequence data
YDR147W	EKI1	15.07	3.88854	below threshold	16.0221	3.41762	below threshold	14.1333	4.12308	below threshold	17.96	6.15	1.19	cytosol	16.73	3.36	1.1	cytosol	16.42	6.78	1.08	cytosol	Ethanolamine kinase, primarily responsible for phosphatidylethanolamine synthesis via the CDP-ethanolamine pathway; exhibits some choline kinase activity, thus contributing to phosphatidylcholine synthesis via the CDP-choline pathway
YHR140W	YHR140W	15.51	4.16959	below threshold	16.0283	4.28553	below threshold	15.0144	3.9086	below threshold	18.34	7.43	1.18	cytosol	14.55	3.41	0.93	cytosol	50.33	10.89	3.24	cytosol	Putative integral membrane protein of unknown function
YKR016W	FCJ1	15.73	4.14195	below threshold	16.0315	3.68601	below threshold	15.4393	4.50399	below threshold	15.55	6.99	0.98	cytosol	17.12	3.15	1.08	cytosol	17.92	7.15	1.13	cytosol	Mitochondrial inner membrane protein involved in formation and molecular structure of crista junctions; impairs oligomerization of F1F0-ATP synthase; null shows altered mitochondrial morphology and abnormal mitochondrial genome maintenance
YER085C	YER085C	16.61	3.811	below threshold	16.0321	3.92042	below threshold	17.2099	3.56959	below threshold	15.74	5.9	0.94	cytosol	16.77	3.72	1	cytosol	15.27	5.38	0.91	cytosol	Putative protein of unknown function
YKR041W	YKR041W	16.47	3.40659	below threshold	16.0328	3.4666	below threshold	16.9234	3.34779	below threshold	17.33	6.55	1.05	cytosol	17.26	4.1	1.04	cytosol	17.87	4.03	1.08	cytosol	Putative protein of unknown function; green fluorescent protein (GFP)-fusion protein localizes to the cytoplasm and nucleus
YER045C	ACA1	15.76	3.92665	below threshold	16.0332	4.14718	below threshold	15.5034	3.71531	below threshold	17.3	6.35	1.09	cytosol	16.48	3.46	1.04	cytosol	14.21	3.15	0.9	cytosol	Basic leucine zipper (bZIP) transcription factor of the ATF/CREB family, may regulate transcription of genes involved in utilization of non-optimal carbon sources
YOR384W	FRE5	16.23	3.8797	below threshold	16.0349	4.17083	below threshold	16.4312	3.48813	below threshold	14.54	4.82	0.89	cytosol	16.23	3.4	1	cytosol	16.28	2.96	1	cytosol	Putative ferric reductase with similarity to Fre2p; expression induced by low iron levels; the authentic, non-tagged protein is detected in highly purified mitochondria in high-throughput studies
YAR070C	YAR070C	16.78	5.06078	below threshold	16.0352	5.08442	below threshold	17.5455	4.95306	below threshold	17.23	5.64	1.02	cytosol	15.84	3.23	0.94	cytosol	16.36	3.26	0.97	cytosol	Dubious open reading frame unlikely to encode a protein, based on available experimental and comparative sequence data
YDR198C	RKM2	15.79	3.39926	below threshold	16.0375	3.96198	below threshold	15.5607	2.88577	below threshold	17.97	4.99	1.13	cytosol	17.22	3.48	1.09	cytosol	19.13	5.91	1.21	cytosol	Ribosomal protein lysine methyltransferase, responsible for trimethylation of the lysine residue at position 3 of Rpl12Ap and Rpl12Bp
YDR284C	DPP1	14.9	4.33429	below threshold	16.0382	4.49674	below threshold	13.7846	3.77874	below threshold	14.68	5.33	0.98	cytosol	13.94	3.07	0.93	cytosol	16.48	6.56	1.1	cytosol	Diacylglycerol pyrophosphate (DGPP) phosphatase, zinc-regulated vacuolar membrane-associated lipid phosphatase, dephosphorylates DGPP to phosphatidate (PA) and Pi, then PA to diacylglycerol; involved in lipid signaling and cell metabolism
YDR083W	RRP8	15.03	3.26968	below threshold	16.0398	2.95313	below threshold	14.0442	3.31518	below threshold	16.11	6.36	1.07	cytosol	15.98	3.19	1.06	cytosol	16.45	2.94	1.09	cytosol	Nucleolar protein involved in rRNA processing, pre-rRNA cleavage at site A2; also involved in telomere maintenance; mutation is synthetically lethal with a gar1 mutation
YDL056W	MBP1	16.04	3.78507	below threshold	16.0401	3.83129	below threshold	NA	NA	technical problem	NA	NA	NA	cytosol	NA	NA	NA	cytosol	NA	NA	NA	cytosol	Transcription factor involved in regulation of cell cycle progression from G1 to S phase, forms a complex with Swi6p that binds to MluI cell cycle box regulatory element in promoters of DNA synthesis genes
YLR253W	YLR253W	15.74	3.88087	below threshold	16.0405	4.0013	below threshold	15.4576	3.78173	below threshold	17.75	6.2	1.12	cytosol	17.73	3.74	1.12	cytosol	14.9	6.9	0.94	cytosol	Putative protein of unknown function; the authentic, non-tagged protein is detected in highly purified mitochondria in high-throughput studies; transcription is periodic during the metabolic cycle; YLR253W is not an essential gene
YDR170C	SEC7	16.36	4.04278	below threshold	16.0411	4.40127	below threshold	16.6949	3.79345	below threshold	14.94	5.66	0.91	cytosol	16.39	3.25	1	cytosol	16.43	3.13	1	cytosol	Guanine nucleotide exchange factor (GEF) for ADP ribosylation factors involved in proliferation of the Golgi, intra-Golgi transport and ER-to-Golgi transport; found in the cytoplasm and on Golgi-associated coated vesicles
YGL199C	YGL199C	16.55	3.283	below threshold	16.0435	3.30017	below threshold	17.0896	3.068	below threshold	15.41	4.9	0.93	cytosol	15.77	2.9	0.95	cytosol	16.04	3.5	0.96	cytosol	Dubious open reading frame unlikely to encode a protein, based on available experimental and comparative sequence data; partially overlaps the verified ORF YIP4/YGL198W
YHR192W	YHR192W	15.48	3.6588	below threshold	16.0515	3.48313	below threshold	14.9136	3.67592	below threshold	16.72	6.92	1.08	cytosol	16.31	3.24	1.05	cytosol	18.65	2.94	1.2	cytosol	Putative protein of unknown function; green fluorescent protein (GFP)-fusion protein localizes to the cytoplasm and is induced in response to the DNA-damaging agent MMS
YGR187C	HGH1	15.3	4.46179	below threshold	16.0515	4.8003	below threshold	14.5623	3.59001	below threshold	18.24	5.34	1.19	cytosol	20.06	3.32	1.31	cytosol	27.42	7.04	1.79	cytosol	Nonessential protein of unknown function; predicted to be involved in ribosome biogenesis; green fluorescent protein (GFP)-fusion protein localizes to the cytoplasm; similar to mammalian BRP16 (Brain protein 16)
YNR070W	PDR18	15.67	3.90401	below threshold	16.0561	3.26858	below threshold	15.3067	4.43706	below threshold	17.11	5.58	1.09	cytosol	16.16	3.73	1.03	cytosol	15.85	3.49	1.01	cytosol	Putative transporter of the ATP-binding cassette (ABC) family, implicated in pleiotropic drug resistance; the authentic, non-tagged protein is detected in highly purified mitochondria in high-throughput studies
YCR010C	ADY2	14.87	4.17463	below threshold	16.0569	4.54346	below threshold	13.701	3.096	below threshold	14.73	4.22	0.99	cytosol	15.63	3.06	1.05	cytosol	17.33	5.44	1.16	cytosol	Acetate transporter required for normal sporulation; phosphorylated in mitochondria
YNR025C	YNR025C	15.85	3.75555	below threshold	16.0619	3.48038	below threshold	15.6466	4.15128	below threshold	16.02	6.07	1.01	cytosol	16.38	3.19	1.03	cytosol	16.07	3.44	1.01	cytosol	Dubious open reading frame unlikely to encode a functional protein, based on available experimental and comparative sequence data; deletion reduces expression of PIS1 gene encoding phosphatidylinositol synthase
YDL213C	NOP6	17.28	4.42815	below threshold	16.0631	3.97367	below threshold	18.502	4.39777	below threshold	18.13	7.94	1.04	cytosol	14.41	3.55	0.83	cytosol	17.02	3.86	0.98	cytosol	Putative RNA-binding protein implicated in ribosome biogenesis; contains an RNA recognition motif (RRM) and has similarity to hydrophilins; NOP6 may be a fungal-specific gene as no homologs have been yet identified in higher eukaryotes
YBR278W	DPB3	16.61	2.86366	below threshold	16.0632	2.88768	below threshold	17.1643	2.72147	below threshold	13.54	5.5	0.81	cytosol	16.44	3.13	0.98	cytosol	17.44	2.84	1.05	cytosol	Third-largest subunit of DNA polymerase II (DNA polymerase epsilon), required to maintain fidelity of chromosomal replication and also for inheritance of telomeric silencing; mRNA abundance peaks at the G1/S boundary of the cell cycle
YDL188C	PPH22	15.15	3.94853	below threshold	16.064	3.52878	below threshold	14.2564	4.01399	below threshold	15.84	5.14	1.04	cytosol	18.28	3.67	1.2	cytosol	26.48	7.16	1.74	cytosol	Catalytic subunit of protein phosphatase 2A (PP2A), functionally redundant with Pph21p; methylated at C terminus; forms alternate complexes with several regulatory subunits; involved in signal transduction and regulation of mitosis
YOL122C	SMF1	16.07	3.60513	below threshold	16.0661	3.64894	below threshold	16.0852	3.55087	below threshold	14.31	4.38	0.89	cytosol	15.77	3.97	0.98	cytosol	15.04	4.41	0.93	cytosol	Divalent metal ion transporter with a broad specificity for di-valent and tri-valent metals; post-translationally regulated by levels of metal ions; member of the Nramp family of metal transport proteins
YHR159W	TDA11	15.69	3.761	below threshold	16.0661	3.66596	below threshold	15.3313	3.81444	below threshold	19.41	6.12	1.23	cytosol	17.13	2.78	1.09	cytosol	14.23	4.2	0.9	cytosol	Putative protein of unknown function; green fluorescent protein (GFP)-fusion protein localizes to the cytoplasm; potential Cdc28p substrate
YOR148C	SPP2	16.96	4.01403	below threshold	16.0679	4.58844	below threshold	17.8661	3.0743	below threshold	14.47	6.74	0.85	cytosol	16.61	4.68	0.97	cytosol	17.67	10.23	1.04	cytosol	Essential protein that promotes the first step of splicing and is required for the final stages of spliceosome maturation; interacts with Prp2p, which may release Spp2p from the spliceosome following the first cleavage reaction
YDR121W	DPB4	15.97	3.24095	below threshold	16.071	3.42726	below threshold	15.8745	3.09805	below threshold	16.33	5.69	1.02	cytosol	15.46	2.7	0.96	cytosol	16.95	6.65	1.06	cytosol	Shared subunit of DNA polymerase (II) epsilon and of ISW2/yCHRAC chromatin accessibility complex; involved in both chromosomal DNA replication and in inheritance of telomeric silencing
YPL172C	COX10	15.35	4.22605	mitochondria	16.0714	4.36329	mitochondria	14.6309	3.9999	mitochondria	16.15	6.16	1.05	mitochondria	15.21	2.89	0.99	mitochondria	17.59	8.31	1.14	mitochondria	Heme A:farnesyltransferase, catalyzes the first step in the conversion of protoheme to the heme A prosthetic group required for cytochrome c oxidase activity; human ortholog is associated with mitochondrial disorders
YLR400W	YLR400W	16.5	3.47957	below threshold	16.0746	3.6763	below threshold	16.9458	2.53849	below threshold	14.07	5.94	0.85	cytosol	15.62	2.93	0.94	cytosol	16.96	6.75	1.02	cytosol	Dubious open reading frame unlikely to encode a functional protein, based on available experimental and comparative sequence data
YLR054C	OSW2	15.48	3.35466	below threshold	16.0748	3.41602	below threshold	14.9073	3.21967	below threshold	17.99	6	1.16	cytosol	16.52	3	1.06	cytosol	17.37	3.16	1.12	cytosol	Protein of unknown function proposed to be involved in the assembly of the spore wall
YLL014W	EMC6	16.14	4.43111	below threshold	16.0752	4.6241	below threshold	16.2377	4.30496	below threshold	16.96	5.34	1.05	cytosol	18.09	3.64	1.11	cytosol	16.09	3.21	0.99	cytosol	Member of a transmembrane complex required for efficient folding of proteins in the ER; null mutant displays induction of the unfolded protein response
YCR098C	GIT1	15.58	4.49174	below threshold	16.0782	4.32623	below threshold	15.1095	4.67851	below threshold	14.18	5.31	0.9	cytosol	15.61	2.6	1	cytosol	17.48	4.18	1.12	cytosol	Plasma membrane permease, mediates uptake of glycerophosphoinositol and glycerophosphocholine as sources of the nutrients inositol and phosphate; expression and transport rate are regulated by phosphate and inositol availability
YLR224W	YLR224W	15.24	3.78077	below threshold	16.0798	3.91394	below threshold	14.4272	3.60995	below threshold	15.7	4.98	1.02	cytosol	16.69	2.94	1.09	cytosol	30.35	8.5	1.98	cytosol	F-box protein and component of SCF ubiquitin ligase complexes involved in ubiquitin-dependent protein catabolism; readily monoubiquitinated in vitro by SCF-Ubc4 complexes; YLR224W is not an essential gene
YOL064C	MET22	15.5	4.01024	below threshold	16.0803	3.80087	below threshold	14.932	4.10695	below threshold	18.66	5.4	1.2	cytosol	19.52	4.09	1.25	cytosol	21.18	4.71	1.36	cytosol	Bisphosphate-3'-nucleotidase, involved in salt tolerance and methionine biogenesis; dephosphorylates 3'-phosphoadenosine-5'-phosphate and 3'-phosphoadenosine-5'-phosphosulfate, intermediates of the sulfate assimilation pathway
YPL058C	PDR12	16.25	3.89589	below threshold	16.0857	3.58634	below threshold	16.4496	4.26854	below threshold	17.19	6.47	1.05	cytosol	16.79	3.95	1.03	cytosol	15.12	3.52	0.92	cytosol	Plasma membrane ATP-binding cassette (ABC) transporter, weak-acid-inducible multidrug transporter required for weak organic acid resistance; induced by sorbate and benzoate and regulated by War1p; mutants exhibit sorbate hypersensitivity
YBR107C	IML3	17.8	4.54007	punctate	16.088	3.84677	punctate	19.5341	4.53849	punctate	18.29	6.95	1.02	punctate	16.87	4.3	0.94	punctate	17.23	3.72	0.96	punctate	Protein with a role in kinetochore function, localizes to the outer kinetochore in a Ctf19p-dependent manner, interacts with Chl4p and Ctf19p
YGL065C	ALG2	16.08	3.55026	below threshold	16.0952	2.97059	below threshold	16.0809	3.91004	below threshold	17.51	7.74	1.08	cytosol	17.22	3.15	1.07	cytosol	16.16	2.67	1	cytosol	Mannosyltransferase that catalyzes two consecutive steps in the N-linked glycosylation pathway; alg2 mutants exhibit temperature-sensitive growth and abnormal accumulation of the lipid-linked oligosaccharide Man2GlcNAc2-PP-Dol
YPR015C	YPR015C	16.11	3.27117	below threshold	16.0956	2.92714	below threshold	16.1382	3.41274	below threshold	17.38	5.36	1.07	cytosol	15.36	3.29	0.95	cytosol	16.74	4.25	1.03	cytosol	Putative protein of unknown function; overexpression causes a cell cycle delay or arrest
YMR316C-A	YMR316C-A	15.76	3.25986	below threshold	16.0969	3.13663	below threshold	15.4309	3.33282	below threshold	18.26	6.7	1.15	cytosol	16.86	3.39	1.06	cytosol	15.54	4.8	0.98	cytosol	Dubious open reading frame unlikely to encode a protein, based on available experimental and comparative sequence data; completely overlaps the verified gene DIA1/YMR316W
YNL291C	MID1	15.48	4.21916	below threshold	16.0985	4.35719	below threshold	14.8725	3.96559	below threshold	14.11	5.51	0.91	cytosol	15.42	2.9	0.99	cytosol	16.64	5.23	1.07	cytosol	N-glycosylated integral membrane protein of the ER membrane and plasma membrane, functions as a stretch-activated Ca2+-permeable cation channel required for Ca2+ influx stimulated by pheromone; interacts with Cch1p; forms an oligomer
YJL037W	IRC18	16.22	4.19426	below threshold	16.0989	4.42248	below threshold	16.3571	4.03204	below threshold	18.38	6.38	1.13	cytosol	13.86	3.23	0.85	cytosol	15.77	6.68	0.97	cytosol	Putative protein of unknown function; expression induced in respiratory-deficient cells and in carbon-limited chemostat cultures; similar to adjacent ORF, YJL038C; null mutant displays increased levels of spontaneous Rad52p foci
YKR012C	YKR012C	15.6	4.19241	below threshold	16.102	4.34724	below threshold	15.1167	4.03302	below threshold	15.53	5.91	0.99	cytosol	15.51	2.73	0.99	cytosol	19.33	5.06	1.23	cytosol	Dubious open reading frame unlikely to encode a protein, based on available experimental and comparative sequence data; partially overlaps the verified gene PRY2
YGR226C	YGR226C	16.47	3.50145	below threshold	16.1052	3.88381	below threshold	16.8581	3.12403	below threshold	15.68	5.55	0.95	cytosol	15.5	3.81	0.94	cytosol	15.27	2.67	0.92	cytosol	Dubious open reading frame, unlikely to encode a protein; not conserved in closely related Saccharomyces species; overlaps significantly with a verified ORF, AMA1/YGR225W
YCL027W	FUS1	15.92	4.56088	below threshold	16.1075	4.87167	below threshold	15.7436	4.20715	below threshold	14.59	5.21	0.91	cytosol	15.96	2.88	1	cytosol	17.33	4.14	1.08	cytosol	Membrane protein localized to the shmoo tip, required for cell fusion; expression regulated by mating pheromone; proposed to coordinate signaling, fusion, and polarization events required for fusion; potential Cdc28p substrate
YOR177C	MPC54	16.88	4.18558	below threshold	16.1075	3.12416	below threshold	17.6702	4.38548	below threshold	17.06	6.95	1.01	cytosol	15.61	2.29	0.92	cytosol	13.73	2.44	0.81	cytosol	Component of the meiotic outer plaque, a membrane-organizing center which is assembled on the cytoplasmic face of the spindle pole body during meiosis II and triggers the formation of the prospore membrane; potential Cdc28p substrate
YER096W	SHC1	15.62	3.32046	below threshold	16.1087	2.90202	below threshold	15.1481	3.68205	below threshold	18.43	5.96	1.17	cytosol	16.75	2.91	1.07	cytosol	14.09	2.68	0.9	cytosol	Sporulation-specific activator of Chs3p (chitin synthase III), required for the synthesis of the chitosan layer of ascospores; has similarity to Skt5p, which activates Chs3p during vegetative growth; transcriptionally induced at alkaline pH
YGL023C	PIB2	15.9	3.06623	below threshold	16.1091	3.263	below threshold	15.707	2.86275	below threshold	14.46	6.18	0.9	cytosol	18.72	3.4	1.17	cytosol	18.06	8.27	1.13	cytosol	Protein binding phosphatidylinositol 3-phosphate, involved in telomere-proximal repression of gene expression; similar to Fab1 and Vps27
YDL048C	STP4	15.89	3.5437	below threshold	16.1103	3.2367	below threshold	15.6933	3.80953	below threshold	18.9	8.5	1.18	cytosol	15.85	2.98	0.99	cytosol	13.77	4.66	0.86	cytosol	Protein containing a Kruppel-type zinc-finger domain; has similarity to Stp1p, Stp2p, and Stp3p
YFL021W	GAT1	15.73	3.93862	below threshold	16.1111	3.93681	below threshold	15.3684	3.91879	below threshold	18.83	5.02	1.19	cytosol	17.37	3.66	1.1	cytosol	14.83	3.63	0.94	cytosol	Transcriptional activator of genes involved in nitrogen catabolite repression; contains a GATA-1-type zinc finger DNA-binding motif; activity and localization regulated by nitrogen limitation and Ure2p
YPR187W	RPO26	17.28	3.18171	below threshold	16.1119	2.07534	below threshold	18.4644	3.49759	below threshold	12.61	3.88	0.72	cytosol	14.44	2.25	0.83	cytosol	15.18	3.2	0.87	cytosol	RNA polymerase subunit ABC23, common to RNA polymerases I, II, and III; part of central core; similar to bacterial omega subunit
YIL037C	PRM2	15.6	4.33208	below threshold	16.1136	4.4095	below threshold	15.1038	4.23456	below threshold	13.84	4.43	0.88	cytosol	14.58	2.75	0.93	cytosol	17.32	4.19	1.11	cytosol	Pheromone-regulated protein, predicted to have 4 transmembrane segments and a coiled coil domain; regulated by Ste12p; required for efficient nuclear fusion
YMR156C	TPP1	18.07	5.02684	below threshold	16.116	4.09614	below threshold	20.0553	5.09183	cytosol	16.4	6.63	0.9	cytosol	13.38	3.1	0.74	cytosol	15.87	3.38	0.87	cytosol	DNA 3'-phosphatase that functions in repair of endogenous damage of double-stranded DNA, activity is specific for removal of 3' phosphates at strand breaks; has similarity to the l-2-haloacid dehalogenase superfamily
YDL238C	GUD1	18.23	5.33585	below threshold	16.1189	4.28123	below threshold	20.365	5.26527	cytosol	22.23	8.74	1.21	cytosol	16.43	2.9	0.9	cytosol	23.33	3.91	1.27	cytosol	Guanine deaminase, a catabolic enzyme of the guanine salvage pathway producing xanthine and ammonia from guanine; activity is low in exponentially-growing cultures but expression is increased in post-diauxic and stationary-phase cultures
YNR062C	YNR062C	14.02	4.05572	below threshold	16.1216	3.86255	below threshold	11.9212	3.14755	below threshold	14.6	4.68	1.04	cytosol	16.6	3.33	1.18	cytosol	20.08	2.93	1.43	cytosol	Putative membrane protein of unknown function
YGR028W	MSP1	15.31	4.10096	below threshold	16.1229	4.43134	below threshold	14.5082	3.24378	below threshold	15.41	4.86	1	cytosol	16.5	2.79	1.07	cytosol	17.13	5.52	1.11	cytosol	Mitochondrial protein involved in sorting of proteins in the mitochondria; putative membrane-spanning ATPase
YIL010W	DOT5	19.36	4.83562	nucleus	16.1284	3.37203	nucleus	22.6117	4.69821	nucleus	23.18	8.42	1.19	nucleus	16.27	2.63	0.84	nucleus	23.55	4.85	1.21	nucleus	Nuclear thiol peroxidase which functions as an alkyl-hydroperoxide reductase during post-diauxic growth
YBR074W	YBR074W	15.29	3.78938	below threshold	16.1338	3.98314	below threshold	14.4573	3.40214	below threshold	16.41	7.16	1.07	cytosol	16.71	3.14	1.09	cytosol	16.28	4.94	1.06	cytosol	Putative metalloprotease
YPL017C	IRC15	16.49	3.471	below threshold	16.1362	3.33938	below threshold	16.8617	3.52764	below threshold	19.17	6.64	1.16	cytosol	15.74	2.98	0.95	cytosol	13.27	2.12	0.8	cytosol	Microtubule associated protein; regulates microtubule dynamics; required for accurate meiotic chromosome segregation; null mutant displays large budded cells due to delayed mitotic progression, increased levels of spontaneous Rad52 foci
YGL074C	YGL074C	16.77	4.16494	below threshold	16.1363	3.9227	below threshold	17.4153	4.30258	below threshold	19.65	6.88	1.17	cytosol	17.07	3.87	1.01	cytosol	17.35	3.14	1.03	cytosol	Dubious open reading frame unlikely to encode a functional protein; overlaps 5' end of essential HSF1 gene encoding heat shock transcription factor
YIR022W	SEC11	15.38	4.32637	below threshold	16.1412	4.54276	below threshold	14.6257	4.08861	below threshold	15.67	5.01	1.01	cytosol	14.32	2.62	0.93	cytosol	14.62	3.69	0.95	cytosol	18kDa catalytic subunit of the Signal Peptidase Complex (SPC; Spc1p, Spc2p, Spc3p, and Sec11p) which cleaves the signal sequence of proteins targeted to the endoplasmic reticulum
YPR094W	RDS3	17.05	5.35999	nucleus	16.1436	4.91944	nucleus	17.9728	5.58546	nucleus	16.76	7.6	0.98	nucleus	18.51	4.15	1.08	nucleus	17.63	3.52	1.03	nucleus	Component of the SF3b subcomplex of the U2 snRNP, zinc cluster protein involved in pre-mRNA splicing and cycloheximide resistance
YBR185C	MBA1	15.53	3.82669	below threshold	16.1458	3.65093	below threshold	14.9274	3.83664	below threshold	14.75	4.76	0.94	cytosol	16.19	3.3	1.04	cytosol	17.26	3.21	1.11	cytosol	Protein involved in assembly of mitochondrial respiratory complexes; may act as a receptor for proteins destined for export from the mitochondrial matrix to the inner membrane
YPL021W	ECM23	16.68	3.67079	below threshold	16.1462	3.81272	below threshold	17.2347	3.38396	below threshold	14.52	5.44	0.87	cytosol	14.61	3.06	0.87	cytosol	14.55	3.24	0.87	cytosol	Non-essential protein of unconfirmed function; affects pre-rRNA processing, may act as a negative regulator of the transcription of genes involved in pseudohyphal growth; homologous to Srd1p
YJL211C	YJL211C	15.93	2.90867	below threshold	16.1492	3.43451	below threshold	15.7331	2.67952	below threshold	17.02	5	1.06	cytosol	14.57	2.3	0.91	cytosol	14.91	3.14	0.93	cytosol	Dubious open reading frame unlikely to encode a protein, based on available experimental and comparative sequence data; partially overlaps the verified gene YJL210W/PEX2
YPL134C	ODC1	14.43	4.16206	below threshold	16.1498	3.94048	below threshold	12.7302	3.83142	below threshold	15.12	4.9	1.04	cytosol	14.09	2.24	0.97	cytosol	18.19	6.72	1.25	cytosol	Mitochondrial inner membrane transporter, exports 2-oxoadipate and 2-oxoglutarate from the mitochondrial matrix to the cytosol for lysine and glutamate biosynthesis and lysine catabolism; suppresses, in multicopy, an fmc1 null mutation
YDR154C	YDR154C	15.99	3.82752	below threshold	16.151	4.09551	below threshold	15.8429	3.39094	below threshold	17.13	6.54	1.07	cytosol	18.1	4.43	1.13	cytosol	14.63	3.8	0.91	cytosol	Dubious open reading frame, null mutant exhibits synthetic phenotype with alpha-synuclein
YER166W	DNF1	15.6	3.83279	below threshold	16.1542	3.897	below threshold	15.0611	3.54329	below threshold	16.47	5.18	1.05	cytosol	15.97	3	1.02	cytosol	14.92	4.51	0.95	cytosol	Aminophospholipid translocase (flippase) that localizes primarily to the plasma membrane; contributes to endocytosis, protein transport and cell polarity; type 4 P-type ATPase
YBL069W	AST1	14.97	4.26339	below threshold	16.1561	4.30452	below threshold	13.7961	3.81175	below threshold	14.55	5.27	0.97	cytosol	14.65	2.76	0.97	cytosol	15.34	3.31	1.02	cytosol	Peripheral membrane protein that interacts with the plasma membrane ATPase Pma1p and has a role in its targeting to the plasma membrane, possibly by influencing its incorporation into lipid rafts
YFR033C	QCR6	14.89	4.51185	below threshold	16.1599	4.70994	below threshold	13.6412	3.83357	below threshold	14.61	4.4	0.98	cytosol	15.16	3.29	1.01	cytosol	14.95	4.07	1	cytosol	Subunit 6 of the ubiquinol cytochrome-c reductase complex, which is a component of the mitochondrial inner membrane electron transport chain; highly acidic protein; required for maturation of cytochrome c1
YGL061C	DUO1	16.57	4.31474	below threshold	16.1615	4.56452	below threshold	16.9805	3.74047	below threshold	22.27	8.85	1.34	cytosol	16.7	3.6	1	cytosol	18.84	2.52	1.13	cytosol	Essential subunit of the Dam1 complex (aka DASH complex), couples kinetochores to the force produced by MT depolymerization thereby aiding in chromosome segregation; is transferred to the kinetochore prior to mitosis
YFL027C	GYP8	15.52	3.92159	below threshold	16.1627	3.86929	below threshold	14.8821	3.86888	below threshold	18.56	5.99	1.19	cytosol	17.57	3.42	1.13	cytosol	16.06	2.96	1.03	cytosol	GTPase-activating protein for yeast Rab family members; Ypt1p is the preferred in vitro substrate but also acts on Sec4p, Ypt31p and Ypt32p; involved in the regulation of ER to Golgi vesicle transport
YDR088C	SLU7	15.14	3.888	below threshold	16.1656	3.95413	below threshold	14.131	3.47014	below threshold	16.24	7.01	1.07	cytosol	18.55	3.53	1.22	cytosol	28.01	8.08	1.84	cytosol	RNA splicing factor, required for ATP-independent portion of 2nd catalytic step of spliceosomal RNA splicing; interacts with Prp18p; contains zinc knuckle domain
YPR126C	YPR126C	16.03	4.17304	below threshold	16.1714	4.36428	below threshold	15.89	4.00101	below threshold	16.97	5.69	1.05	cytosol	15	2.94	0.93	cytosol	15.53	4.3	0.96	cytosol	Dubious open reading frame unlikely to encode a functional protein, based on available experimental and comparative sequence data
YKL221W	MCH2	15.12	4.34362	below threshold	16.1719	4.02835	below threshold	14.088	4.46314	below threshold	15.35	5.37	1.01	cytosol	14.84	2.87	0.98	cytosol	17.69	5.42	1.16	cytosol	Protein with similarity to mammalian monocarboxylate permeases, which are involved in transport of monocarboxylic acids across the plasma membrane; mutant is not deficient in monocarboxylate transport
YCL038C	ATG22	15.76	4.37859	below threshold	16.1767	4.05441	below threshold	15.3682	4.57165	below threshold	16.37	4.38	1.03	cytosol	15.47	3.03	0.98	cytosol	19.48	4.85	1.23	cytosol	Vacuolar integral membrane protein required for efflux of amino acids during autophagic body breakdown in the vacuole; null mutation causes a gradual loss of viability during starvation
YLR057W	YLR057W	15.52	3.28745	below threshold	16.1813	3.30432	below threshold	14.8761	3.18451	below threshold	17.91	6.42	1.15	cytosol	16.58	3.49	1.06	cytosol	16.25	5.59	1.04	cytosol	Putative protein of unknown function; YLR050C is not an essential gene
YGL261C	PAU11	16.4	3.38339	below threshold	16.1834	3.16574	below threshold	16.6323	3.72973	below threshold	18.03	7.41	1.09	cytosol	15.09	3.36	0.92	cytosol	15.47	3.88	0.94	cytosol	Putative protein of unknown function and member of the seripauperin multigene family encoded mainly in subtelomeric regions; mRNA expression appears to be regulated by SUT1 and UPC2
YDR040C	ENA1	15.61	4.66355	below threshold	16.1853	3.54054	below threshold	15.0599	5.19879	below threshold	16.87	5.35	1.08	cytosol	16.8	3.71	1.07	cytosol	16	3.27	1.02	cytosol	P-type ATPase sodium pump, involved in Na+ and Li+ efflux to allow salt tolerance
YOR094W	ARF3	15.33	4.38625	below threshold	16.1854	4.5791	below threshold	14.4957	4.01248	below threshold	15.51	4.75	1.01	cytosol	14.09	3.56	0.91	cytosol	16.15	4.38	1.05	cytosol	Glucose-repressible ADP-ribosylation factor, GTPase of the Ras superfamily involved in development of polarity
YGR026W	YGR026W	15.39	3.67072	below threshold	16.1861	3.20008	below threshold	14.6245	3.99811	below threshold	15.52	4.66	1	cytosol	15	3.13	0.97	cytosol	16.54	4.85	1.07	cytosol	Putative protein of unknown function; green fluorescent protein (GFP)-fusion protein localizes to the cell periphery
YKL044W	YKL044W	17.35	4.20857	below threshold	16.1891	4.20283	below threshold	18.5213	3.91599	below threshold	18.03	5.39	1.03	cytosol	19.26	4.08	1.1	cytosol	17.98	3.47	1.03	cytosol	Dubious open reading frame unlikely to encode a functional protein, based on available experimental and comparative sequence data
YPL224C	MMT2	14.47	4.88313	below threshold	16.1905	5.11161	below threshold	12.7689	4.17935	below threshold	14.93	4.34	1.03	cytosol	14.67	2.32	1.01	cytosol	18.51	6.45	1.27	cytosol	Putative metal transporter involved in mitochondrial iron accumulation; closely related to Mmt1p
YOR153W	PDR5	16.11	3.86356	below threshold	16.1921	4.37237	below threshold	16.0493	3.45625	below threshold	18.04	6.65	1.11	cytosol	15.6	3.68	0.96	cytosol	15.95	3.64	0.98	cytosol	Plasma membrane ATP-binding cassette (ABC) transporter, multidrug transporter actively regulated by Pdr1p; also involved in steroid transport, cation resistance, and cellular detoxification during exponential growth
YJL103C	GSM1	16.69	4.43352	below threshold	16.1924	4.57836	below threshold	17.1961	4.0498	below threshold	20.18	5.86	1.2	cytosol	17.98	4.41	1.07	cytosol	17.65	3.72	1.05	cytosol	Putative zinc cluster protein of unknown function; proposed to be involved in the regulation of energy metabolism, based on patterns of expression and sequence analysis
YHL047C	ARN2	15.84	4.18057	below threshold	16.1925	3.68162	below threshold	15.507	4.42216	below threshold	14.62	4.68	0.92	cytosol	15.52	2.82	0.97	cytosol	16.56	4.35	1.04	cytosol	Transporter, member of the ARN family of transporters that specifically recognize siderophore-iron chelates; responsible for uptake of iron bound to the siderophore triacetylfusarinine C
YDL187C	YDL187C	15.9	3.4165	below threshold	16.1946	2.87607	below threshold	15.6253	4.2466	below threshold	17.79	5.99	1.11	cytosol	18	3.62	1.13	cytosol	16.37	3.92	1.02	cytosol	Dubious ORF unlikely to encode a functional protein, based on available experimental and comparative sequence data
YBL051C	PIN4	15.68	3.8164	below threshold	16.1959	3.64621	below threshold	15.1713	3.93699	below threshold	17.28	6.6	1.1	cytosol	18.16	3.81	1.15	cytosol	15.19	4.11	0.96	cytosol	Protein involved in G2/M phase progression and response to DNA damage, interacts with Rad53p; contains an RNA recognition motif, a nuclear localization signal, and several SQ/TQ cluster domains; hyperphosphorylated in response to DNA damage
YFR045W	YFR045W	16.1	4.42751	below threshold	16.196	4.71613	below threshold	16.0233	4.16627	below threshold	16.09	4.83	0.99	cytosol	14.58	2.93	0.9	cytosol	16.77	3.36	1.04	cytosol	Putative mitochondrial transport protein; null mutant is viable, exhibits decreased levels of chitin and normal resistance to calcofluor white
YGL049C	TIF4632	14.11	3.82794	below threshold	16.197	3.36795	below threshold	12.0408	3.37744	below threshold	17.25	6.18	1.22	cytosol	15.23	3.06	1.07	cytosol	17.28	3.49	1.22	cytosol	Translation initiation factor eIF4G, subunit of the mRNA cap-binding protein complex (eIF4F) that also contains eIF4E (Cdc33p); associates with the poly(A)-binding protein Pab1p, also interacts with eIF4A (Tif1p); homologous to Tif4631p
YGR190C	YGR190C	16.72	3.55483	below threshold	16.1986	3.92794	below threshold	17.264	2.80877	below threshold	17.18	8.65	1.02	cytosol	17.33	4.29	1.03	cytosol	16.16	4.07	0.96	cytosol	Dubious open reading frame unlikely to encode a protein, based on available experimental and comparative sequence data; overlaps the verified gene HIP1/YGR191W
YGL182C	YGL182C	16.53	3.50249	below threshold	16.1998	3.38139	below threshold	16.8759	3.61605	below threshold	16.14	5.52	0.97	cytosol	17.55	3.07	1.06	cytosol	18.67	3.44	1.12	cytosol	Dubious open reading frame unlikely to encode a protein, based on available experimental and comparative sequence data; partially overlaps the verified ORF MND1/YGL183C
YLR444C	YLR444C	15.76	4.47246	below threshold	16.2008	4.83318	below threshold	15.3255	3.89258	below threshold	14.57	4.63	0.92	cytosol	13.51	2.27	0.85	cytosol	18.09	7.1	1.14	cytosol	Dubious open reading frame unlikely to encode a functional protein, based on available experimental and comparative sequence data
YPR108W	RPN7	15.32	3.71121	below threshold	16.2012	3.90363	below threshold	14.4545	3.08721	below threshold	17.33	5.59	1.13	cytosol	17.25	3.6	1.12	cytosol	13.54	5.54	0.88	cytosol	Essential, non-ATPase regulatory subunit of the 26S proteasome, similar to another S. cerevisiae regulatory subunit, Rpn5p, as well as to mammalian proteasome subunits
YJR095W	SFC1	14.64	4.24781	below threshold	16.2026	4.34462	below threshold	13.0858	3.38565	below threshold	14.59	5.84	0.99	cytosol	15.82	3.82	1.08	cytosol	17	4.66	1.16	cytosol	Mitochondrial succinate-fumarate transporter, transports succinate into and fumarate out of the mitochondrion; required for ethanol and acetate utilization
YDL215C	GDH2	15.51	3.46217	below threshold	16.2072	3.68289	below threshold	14.8232	2.98361	below threshold	14.13	4.18	0.91	cytosol	17.78	3.39	1.14	cytosol	16.78	4.18	1.08	cytosol	NAD(+)-dependent glutamate dehydrogenase, degrades glutamate to ammonia and alpha-ketoglutarate; expression sensitive to nitrogen catabolite repression and intracellular ammonia levels
YJL038C	LOH1	16.13	3.49049	below threshold	16.2077	3.74571	below threshold	16.0635	3.02085	below threshold	18.26	6.16	1.13	cytosol	14.05	2.41	0.87	cytosol	15.16	4.08	0.93	cytosol	Protein of unknown function with proposed roles in maintenance of genome integrity and also in spore wall assembly; induced during sporulation; repressed during vegetative growth by Sum1p and Hst1p; sequence similar to IRC1
YBR044C	TCM62	17.25	4.6813	below threshold	16.2077	4.93273	below threshold	18.3272	4.11747	below threshold	15.44	4.82	0.89	cytosol	16.01	3.44	0.92	cytosol	16.96	4.22	0.98	cytosol	Protein involved in the assembly of the mitochondrial succinate dehydrogenase complex; putative chaperone
YPL272C	YPL272C	16.25	3.07012	below threshold	16.2112	3.12842	below threshold	16.298	3.02692	below threshold	16.53	6.88	1.01	cytosol	16.04	3.48	0.98	cytosol	15.36	3.34	0.94	cytosol	Putative protein of unknown function; gene expression induced in response to ketoconazole; YPL272C is not an essential gene
YBL028C	YBL028C	16.64	3.84094	below threshold	16.214	4.04753	below threshold	17.0727	3.68261	below threshold	17.38	6.91	1.04	cytosol	17.24	3.96	1.03	cytosol	16.74	6.27	1	cytosol	Protein of unknown function that may interact with ribosomes; green fluorescent protein (GFP)-fusion protein localizes to the nucleolus; predicted to be involved in ribosome biogenesis
YAL067C	SEO1	15.88	5.52089	below threshold	16.2161	5.93857	below threshold	15.5649	5.06914	below threshold	15.36	5.71	0.96	cytosol	15.43	3.84	0.97	cytosol	78.91	32.34	4.96	cell periphery	Putative permease, member of the allantoate transporter subfamily of the major facilitator superfamily; mutation confers resistance to ethionine sulfoxide
YPL197C	YPL197C	15.77	3.3801	below threshold	16.2167	3.5799	below threshold	15.3335	3.15699	below threshold	14.36	4.91	0.91	cytosol	14.55	2.64	0.92	cytosol	18.82	2.65	1.19	cytosol	Dubious open reading frame unlikely to encode a protein, based on experimental and comparative sequence data; partially overlaps the ribosomal gene RPB7B
YAR068W	YAR068W	16.58	4.10359	below threshold	16.218	4.23069	below threshold	16.9651	3.95279	below threshold	15.55	5.31	0.93	cytosol	12.73	2.81	0.76	cytosol	14.04	2.61	0.84	cytosol	Fungal-specific protein of unknown function; induced in respiratory-deficient cells
YPL121C	MEI5	16.02	3.65996	below threshold	16.2222	4.07474	below threshold	15.8313	3.02781	below threshold	18.15	6.31	1.13	cytosol	16.33	3.47	1.01	cytosol	17.8	3.32	1.11	cytosol	Meiosis specific protein involved in DMC1-dependent meiotic recombination, forms heterodimer with Sae3p; proposed to be an assembly factor for Dmc1p
YDR371W	CTS2	14.97	3.18445	below threshold	16.2298	3.29694	below threshold	13.7347	2.92158	below threshold	18.05	6.17	1.2	cytosol	17.24	3.28	1.15	cytosol	19.02	4.91	1.26	cytosol	Protein similar to Ashbya gossypii sporulation-specific chitinase
YLR164W	YLR164W	15.61	3.43239	below threshold	16.2299	3.49856	below threshold	15.0152	2.83448	below threshold	15.39	5.8	0.98	cytosol	15.34	2.98	0.98	cytosol	15.84	3.91	1.01	cytosol	Mitochondrial inner membrane of unknown function; similar to Tim18p and Sdh4p; expression induced by nitrogen limitation in a GLN3, GAT1-dependent manner
YNL191W	DUG3	15.8	3.56945	below threshold	16.2328	3.18673	below threshold	15.3761	3.72002	below threshold	15.51	5.21	0.98	cytosol	17.35	4.48	1.09	cytosol	28.32	10.07	1.79	cytosol	Probable glutamine amidotransferase, forms a complex with Dug1p and Dug2p to degrade glutathione (GSH) and other peptides containing a gamma-glu-X bond in an alternative pathway to GSH degradation by gamma-glutamyl transpeptidase (Ecm38p)
YHL012W	YHL012W	14.75	3.57225	below threshold	16.2364	3.43605	below threshold	13.2744	3.26801	below threshold	17.69	6.4	1.19	cytosol	17.34	3.22	1.17	cytosol	19.55	6.88	1.32	cytosol	Putative protein of unknown function, has some homology to Ugp1p, which encodes UDP-glucose pyrophosphorylase
YNL144C	YNL144C	16.1	3.50284	below threshold	16.2368	3.76017	below threshold	15.9706	3.41092	below threshold	17.23	5.7	1.07	cytosol	20.3	3.68	1.26	cytosol	14.97	2.49	0.93	cytosol	Putative protein of unknown function; the authentic, non-tagged protein is detected in highly purified mitochondria in high-throughput studies; YNL144C is not an essential gene
YBR062C	YBR062C	15.94	3.59846	below threshold	16.2407	3.54871	below threshold	15.653	3.64968	below threshold	17.2	5.77	1.07	cytosol	19.84	4.53	1.24	cytosol	15.38	5.29	0.96	cytosol	Hypothetical protein
YOR100C	CRC1	15.16	4.45443	below threshold	16.2429	4.5333	below threshold	14.0866	3.9982	below threshold	15.79	5.32	1.04	cytosol	14.51	2.85	0.95	cytosol	17.75	5.98	1.17	cytosol	Mitochondrial inner membrane carnitine transporter, required for carnitine-dependent transport of acetyl-CoA from peroxisomes to mitochondria during fatty acid beta-oxidation
YGL114W	YGL114W	17.29	5.798	below threshold	16.2459	5.32779	below threshold	18.3426	6.31791	below threshold	15.27	5.86	0.88	cytosol	16.78	5.77	0.97	cytosol	15.93	4.31	0.92	cytosol	Putative protein of unknown function; predicted member of the oligopeptide transporter (OPT) family of membrane transporters
YPR027C	YPR027C	15.47	3.83079	below threshold	16.2468	3.6624	below threshold	14.7158	3.91044	below threshold	16.12	5.29	1.04	cytosol	15.08	3.51	0.97	cytosol	16.5	2.37	1.06	cytosol	Putative protein of unknown function
YER143W	DDI1	14.64	3.77544	below threshold	16.2478	3.64892	below threshold	13.062	3.39314	below threshold	14.71	4.84	1	cytosol	16.02	2.7	1.09	cytosol	15.55	3.38	1.06	cytosol	DNA damage-inducible v-SNARE binding protein, contains a ubiquitin-associated (UBA) domain, may act as a negative regulator of constitutive exocytosis, may play a role in S-phase checkpoint control
YPR144C	NOC4	15.8	3.83787	below threshold	16.2482	3.92659	below threshold	15.371	3.7712	below threshold	16.62	8.61	1.05	cytosol	16.65	4.13	1.05	cytosol	17.17	6.53	1.08	cytosol	Nucleolar protein, forms a complex with Nop14p that mediates maturation and nuclear export of 40S ribosomal subunits
YDL022W	GPD1	16.47	4.76654	below threshold	16.2489	2.80448	below threshold	16.7081	4.94877	below threshold	15.17	4.42	0.92	cytosol	14.72	3.44	0.89	cytosol	20.26	9.78	1.23	cytosol	NAD-dependent glycerol-3-phosphate dehydrogenase, key enzyme of glycerol synthesis, essential for growth under osmotic stress; expression regulated by high-osmolarity glycerol response pathway; homolog of Gpd2p
YJL112W	MDV1	16.28	4.04925	below threshold	16.2492	3.93621	below threshold	16.3342	4.16854	below threshold	13.65	4.93	0.83	cytosol	15.52	5.47	0.95	cytosol	14.29	3.04	0.87	cytosol	Peripheral protein of the cytosolic face of the mitochondrial outer membrane, required for mitochondrial fission; interacts with Fis1p and with the dynamin-related GTPase Dnm1p; contains WD repeats
YAL042W	ERV46	15.66	3.67669	below threshold	16.2588	3.26732	below threshold	15.08	3.92127	below threshold	13.99	5.03	0.89	cytosol	15.33	3.46	0.97	cytosol	15.74	4.13	1	cytosol	Protein localized to COPII-coated vesicles, forms a complex with Erv41p; involved in the membrane fusion stage of transport
YIL032C	YIL032C	15.61	4.35203	below threshold	16.2594	4.48582	below threshold	14.9766	3.08531	below threshold	15.04	5.71	0.96	cytosol	16.25	2.62	1.04	cytosol	16.07	3.73	1.02	cytosol	Dubious open reading frame unlikely to encode a protein, based on available experimental and comparative sequence data
YPL114W	YPL114W	17.41	3.64321	below threshold	16.2594	4.32303	below threshold	18.5806	3.23365	below threshold	15.48	5.64	0.88	cytosol	15.29	3.14	0.87	cytosol	22.13	6.81	1.27	cytosol	Dubious open reading frame, unlikely to encode a functional protein; largely overlaps ORF YPL113C; diploid deletion in BY4743 strain background exhibits high budding index
YHR017W	YSC83	15.27	4.07373	below threshold	16.2611	4.2645	below threshold	14.2825	3.51387	below threshold	16.53	4.51	1.08	cytosol	19.54	4.01	1.27	cytosol	30.14	11.84	1.97	cytosol	Non-essential mitochondrial protein of unknown function; mRNA induced during meiosis, peaking between mid to late prophase of meiosis I; similar to S. douglasii YSD83
YNR077C	YNR077C	16.59	4.16897	below threshold	16.2618	3.38758	below threshold	16.9329	4.66932	below threshold	18.43	6.57	1.11	cytosol	16.62	3.12	1	cytosol	15.33	3.95	0.92	cytosol	Dubious open reading frame unlikely to encode a protein, based on available experimental and comparative sequence data
YCR099C	YCR099C	15.05	4.06656	below threshold	16.2624	4.22982	below threshold	13.8523	3.60586	below threshold	18.1	5.36	1.2	cytosol	15.47	2.8	1.02	cytosol	17.63	4.22	1.17	cytosol	Putative protein of unknown function
YJL013C	MAD3	17.63	3.50851	nucleus,cytosol	16.2678	2.78066	nucleus,cytosol	19.0032	3.49837	nucleus,cytosol	18.73	6.65	1.06	nucleus,cytosol	16.2	3.13	0.91	nucleus,cytosol	13.35	2.09	0.75	nucleus,cytosol	Subunit of the spindle-assembly checkpoint complex, which delays anaphase onset in cells with defects in mitotic spindle assembly; pseudosubstrate inhibitor of APC(Cdc20), the anaphase promoting complex involved in securin (Pds1p) turnover
YLL063C	AYT1	16.39	3.66702	below threshold	16.2687	3.54108	below threshold	16.5415	3.73597	below threshold	17.02	6.6	1.03	cytosol	15.65	3.33	0.95	cytosol	13.87	3.18	0.84	cytosol	Acetyltransferase; catalyzes trichothecene 3-O-acetylation, suggesting a possible role in trichothecene biosynthesis
YOR391C	HSP33	16.77	4.41319	below threshold	16.2697	4.58812	below threshold	17.2842	4.15508	below threshold	17.43	6	1.03	cytosol	16.34	3.68	0.97	cytosol	18.13	3.72	1.08	cytosol	Possible chaperone and cysteine protease with similarity to E. coli Hsp31 and S. cerevisiae Hsp31p, Hsp32p, and Sno4p; member of the DJ-1/ThiJ/PfpI superfamily, which includes human DJ-1 involved in Parkinson's disease
YJR099W	YUH1	17.34	4.00868	below threshold	16.2701	3.89974	below threshold	18.4235	3.85291	below threshold	18.69	7.35	1.07	cytosol	15.42	2.7	0.88	cytosol	16.38	2.76	0.94	cytosol	Ubiquitin C-terminal hydrolase that cleaves ubiquitin-protein fusions to generate monomeric ubiquitin; hydrolyzes the peptide bond at the C-terminus of ubiquitin; also the major processing enzyme for the ubiquitin-like protein Rub1p
YJR098C	YJR098C	16.5	4.25983	below threshold	16.2708	4.88893	below threshold	16.7372	3.47163	below threshold	18.86	6.51	1.14	cytosol	18.6	3.41	1.12	cytosol	14.55	2.37	0.88	cytosol	Putative protein of unknown function; the authentic, non-tagged protein is detected in highly purified mitochondria in high-throughput studies
YKR104W	YKR104W	15.13	3.91318	below threshold	16.2786	4.08264	below threshold	14.009	3.15601	below threshold	14.07	4.42	0.92	cytosol	14.57	2.63	0.96	cytosol	14.83	2.42	0.97	cytosol	Putative transporter of the multidrug resistance-associated protein (MRP) subfamily; contains a stop codon in S288C; adjacent ORFs YKR103W and YKR104W are merged in different strain backgrounds
YBR284W	YBR284W	16.28	3.4566	below threshold	16.2826	3.44027	below threshold	NA	NA	technical problem	NA	NA	NA	cytosol	NA	NA	NA	technical problem	NA	NA	NA	cytosol	Putative protein of unknown function; YBR284W is not an essential gene; null mutant exhibits decreased resistance to rapamycin and wortmannin and synthetic phenotype with alpha-synuclein
YJL004C	SYS1	14.74	4.511	below threshold	16.2857	4.57802	below threshold	13.2075	3.82821	below threshold	14.84	4.82	1	cytosol	14.28	2.52	0.96	cytosol	15.76	3.62	1.06	cytosol	Integral membrane protein of the Golgi required for targeting of the Arf-like GTPase Arl3p to the Golgi; multicopy suppressor of ypt6 null mutation
YPR170C	YPR170C	15.88	3.83753	below threshold	16.2885	3.79944	below threshold	15.492	3.84264	below threshold	18.14	5.44	1.14	cytosol	16.58	3.75	1.04	cytosol	16.59	8.24	1.04	cytosol	Dubious open reading frame unlikely to encode a protein, based on available experimental and comparative sequence data; partially overlaps the dubious ORFs YPR169W-A and YPR170W-B
YKR066C	CCP1	16.78	3.7255	below threshold	16.2902	4.03374	below threshold	17.2885	3.49613	below threshold	15.65	5.1	0.93	cytosol	18.67	2.93	1.11	cytosol	25.54	5.8	1.52	cytosol	Mitochondrial cytochrome-c peroxidase; degrades reactive oxygen species in mitochondria, involved in the response to oxidative stress
YBR028C	YBR028C	16.22	3.47614	below threshold	16.2913	3.32453	below threshold	16.1562	3.57911	below threshold	18.3	5.82	1.12	cytosol	14.53	2.95	0.89	cytosol	14.47	3.18	0.89	cytosol	Putative protein kinase, possible substrate of cAMP-dependent protein kinase (PKA)
YBL067C	UBP13	15.88	3.21192	below threshold	16.293	3.32973	below threshold	15.4723	3.12696	below threshold	17.22	5.99	1.08	cytosol	17.88	3.54	1.12	cytosol	15.65	2.77	0.98	cytosol	Putative ubiquitin carboxyl-terminal hydrolase, ubiquitin-specific protease that cleaves ubiquitin-protein fusions
YOR255W	OSW1	15.48	3.74778	below threshold	16.295	3.56109	below threshold	14.6721	3.72511	below threshold	17.13	6.37	1.1	cytosol	15.61	3.2	1	cytosol	14.78	2.17	0.95	cytosol	Protein involved in sporulation; required for the construction of the outer spore wall layers; required for proper localization of Spo14p
YLR408C	YLR408C	16.82	4.55665	punctate	16.2967	4.2509	punctate	17.365	4.72631	punctate	21.13	7.36	1.25	punctate	21.34	3.78	1.26	punctate	21.97	6.35	1.3	punctate	Putative protein of unknown function; green fluorescent protein (GFP)-fusion protein localizes to the endosome; YLR408C is not an essential gene
YOR141C	ARP8	14.62	3.81441	below threshold	16.2988	3.77984	below threshold	12.9624	3.18245	below threshold	17.68	5.73	1.2	cytosol	13.94	3.13	0.95	cytosol	17.03	7.28	1.16	cytosol	Nuclear actin-related protein involved in chromatin remodeling, component of chromatin-remodeling enzyme complexes
YKL108W	SLD2	15.75	2.96311	below threshold	16.3025	3.12538	below threshold	15.2061	2.3973	below threshold	16.73	5.83	1.06	cytosol	16.78	3.16	1.06	cytosol	16.76	3.38	1.06	cytosol	Protein required for DNA replication, phosphorylated in S phase by S-phase cyclin-dependent kinases (Cdks), phosphorylation is essential for DNA replication and for complex formation with Dpb11p; potential Cdc28p substrate
YDR347W	MRP1	15.27	4.05544	below threshold	16.3039	4.30992	below threshold	14.2476	3.62351	below threshold	15.83	4.68	1.03	cytosol	17.09	3.43	1.11	cytosol	15.39	6.64	1	cytosol	Mitochondrial ribosomal protein of the small subunit; MRP1 exhibits genetic interactions with PET122, encoding a COX3-specific translational activator, and with PET123, encoding a small subunit mitochondrial ribosomal protein
YKL099C	UTP11	15.92	4.06775	below threshold	16.3045	4.01513	below threshold	15.5448	4.09578	below threshold	16.04	5.15	1	cytosol	15.93	3.39	1	cytosol	16.96	8.46	1.06	cytosol	Subunit of U3-containing Small Subunit (SSU) processome complex involved in production of 18S rRNA and assembly of small ribosomal subunit
YNR021W	YNR021W	14.63	3.64715	below threshold	16.305	3.45556	below threshold	12.976	3.0948	below threshold	16.6	7.39	1.13	cytosol	15.52	2.82	1.06	cytosol	15.41	4.49	1.05	cytosol	Putative protein of unknown function; green fluorescent protein (GFP)-fusion protein localizes to the endoplasmic reticulum; YNR021W is not an essential gene
YOL023W	IFM1	15.77	3.71946	below threshold	16.3095	3.42395	below threshold	15.245	3.89417	below threshold	17.19	8.11	1.09	cytosol	20.62	3.5	1.3	cytosol	16.25	3.96	1.03	cytosol	Mitochondrial translation initiation factor 2
YER036C	ARB1	15.63	3.4611	below threshold	16.3127	3.21167	below threshold	14.9507	3.51989	below threshold	17.12	5.12	1.09	cytosol	16.12	3.52	1.03	cytosol	18.53	3.35	1.18	cytosol	ATPase of the ATP-binding cassette (ABC) family involved in 40S and 60S ribosome biogenesis, has similarity to Gcn20p; shuttles from nucleus to cytoplasm, physically interacts with Tif6p, Lsg1p
YOR059C	YOR059C	15.14	3.19262	below threshold	16.3179	3.02877	below threshold	13.9951	3.00597	below threshold	16.61	5.76	1.09	cytosol	17.34	3.04	1.14	cytosol	15.66	2.61	1.03	cytosol	Hypothetical protein
YER050C	RSM18	16.55	3.54029	below threshold	16.3184	3.62417	below threshold	16.8156	3.34958	below threshold	14.08	5.56	0.85	cytosol	17.14	3.32	1.03	cytosol	15.76	2.7	0.95	cytosol	Mitochondrial ribosomal protein of the small subunit, has similarity to E. coli S18 ribosomal protein
YCR073C	SSK22	16.68	4.73532	below threshold	16.3253	4.83451	below threshold	17.0693	4.58654	below threshold	16.27	5.83	0.97	cytosol	19.7	3.87	1.18	cytosol	15.1	2.95	0.9	cytosol	MAP kinase kinase kinase of the HOG1 mitogen-activated signaling pathway; functionally redundant with, and homologous to, Ssk2p; interacts with and is activated by Ssk1p; phosphorylates Pbs2p
YOR318C	YOR318C	16.8	3.7782	below threshold	16.3254	4.10684	below threshold	17.2945	2.94835	below threshold	19.21	5.86	1.14	cytosol	16.1	2.49	0.95	cytosol	19.71	4.26	1.17	cytosol	Dubious open reading frame unlikely to encode a protein, based on available experimental and comparative sequence data; transcript is predicted to be spliced but there is no evidence that it is spliced in vivo
YHL027W	RIM101	16.48	3.84494	below threshold	16.3322	4.38403	below threshold	16.6564	3.66829	below threshold	16.4	5.31	0.99	cytosol	18.71	3.58	1.13	cytosol	16.8	7.8	1.01	cytosol	Transcriptional repressor involved in response to pH and in cell wall construction; required for alkaline pH-stimulated haploid invasive growth and sporulation; activated by proteolytic processing; similar to A. nidulans PacC
YBR089W	YBR089W	18.5	5.21913	below threshold	16.3325	5.26133	below threshold	20.6887	4.60443	cytosol	13.49	4.47	0.72	cytosol	17.12	4.21	0.92	cytosol	19.94	3.76	1.07	cytosol	Dubious open reading frame unlikely to encode a protein, based on available experimental and comparative sequence data; almost completely overlaps the verified gene POL30
YMR294W-A	YMR294W-A	16.84	3.8649	below threshold	16.3342	3.9611	below threshold	17.3659	3.62828	below threshold	14.8	5.91	0.87	cytosol	15.95	2.99	0.94	cytosol	15.5	2.86	0.92	cytosol	Dubious open reading frame unlikely to encode a functional protein, substantially overlaps YMR295C; deletion causes sensitivity to unfolded protein response-inducing agents
YDL098C	SNU23	18.98	4.88292	nucleus	16.3345	4.76469	nucleus	21.6579	4.75709	nucleus	22.49	7.3	1.18	nucleus	24.01	4.79	1.26	nucleus	25.94	3.7	1.36	nucleus	Component of U4/U6.U5 snRNP involved in mRNA splicing via spliceosome
YBL050W	SEC17	14.64	4.094	below threshold	16.3377	4.07443	below threshold	12.9779	3.26762	below threshold	14.46	4.45	0.98	cytosol	14.03	3	0.95	cytosol	16.7	5.82	1.13	cytosol	Peripheral membrane protein required for vesicular transport between ER and Golgi and for the 'priming' step in homotypic vacuole fusion, part of the cis-SNARE complex; has similarity to alpha-SNAP
YJL132W	YJL132W	16.34	3.84957	below threshold	16.3424	4.31621	below threshold	16.3506	3.47806	below threshold	18.25	6.27	1.11	cytosol	19.11	3.98	1.16	cytosol	16.47	4.8	1	cytosol	Putative protein of unknown function; localizes to the membrane fraction; possible Zap1p-regulated target gene induced by zinc deficiency; YJL132W is a non-essential gene
YLR357W	RSC2	15.04	3.94249	below threshold	16.3442	4.01892	below threshold	13.7509	3.19426	below threshold	16.54	6.52	1.09	cytosol	13.45	2.85	0.89	cytosol	17.21	6.97	1.14	cytosol	Component of the RSC chromatin remodeling complex; required for expression of mid-late sporulation-specific genes; involved in telomere maintenance
YDR526C	YDR526C	17.49	3.7536	below threshold	16.345	3.82951	below threshold	18.6576	3.38583	below threshold	15.64	5.68	0.89	cytosol	15.96	3	0.91	cytosol	16.26	3.11	0.92	cytosol	Dubious open reading frame unlikely to encode a functional protein, based on available experimental and comparative sequence data
YMR247C	RKR1	16.82	3.86445	below threshold	16.3473	2.91259	below threshold	17.3196	4.04662	below threshold	15.12	5.33	0.89	cytosol	18.31	3.27	1.08	cytosol	15.64	3.12	0.92	cytosol	Nuclear RING domain protein with functional connections to chromatin modification; may interact with ribosomes, based on co-purification experiments; YMR247C is not an essential gene
YJL156W-A	YJL156W-A	15.98	4.13515	below threshold	16.3483	3.86094	below threshold	15.6274	4.28667	below threshold	17.49	5.69	1.09	cytosol	16.11	3.06	1	cytosol	15.01	6.11	0.93	cytosol	Dubious open reading frame unlikely to encode a protein, based on available experimental and comparative sequence data
YPL235W	RVB2	15.96	3.48139	below threshold	16.3484	3.42434	below threshold	15.5843	3.50575	below threshold	17.44	5.83	1.09	cytosol	16.45	2.73	1.03	cytosol	14.73	3.33	0.92	cytosol	Essential protein involved in transcription regulation; component of chromatin remodeling complexes; required for assembly and function of the INO80 complex; also referred to as reptin; member of the RUVB-like protein family
YOL039W	RPP2A	16.63	4.11384	below threshold	16.3486	4.00101	below threshold	16.9274	4.22435	below threshold	16.75	5.66	1	cytosol	17.21	3.17	1.03	cytosol	19.27	8.21	1.15	cytosol	Ribosomal protein P2 alpha, a component of the ribosomal stalk, which is involved in the interaction between translational elongation factors and the ribosome; regulates the accumulation of P1 (Rpp1Ap and Rpp1Bp) in the cytoplasm
YCR038W-A	YCR038W-A	15.44	4.57702	below threshold	16.3491	4.86437	below threshold	14.5436	4.2737	below threshold	15.62	6.27	1.01	cytosol	16.25	3.42	1.05	cytosol	15.51	3.66	1	cytosol	Dubious open reading frame unlikely to encode a protein, based on available experimental and comparative sequence data; completely overlaps the verified gene BUD5/YCR038C; identified by homology with hemiascomycetous yeast species
YGR153W	YGR153W	17.98	4.26394	below threshold	16.359	3.73065	below threshold	19.6229	4.12405	cytosol	19.61	7.46	1.09	cytosol	14.35	2.09	0.79	cytosol	16.59	2.82	0.92	cytosol	Putative protein of unknown function
YDR218C	SPR28	15.81	4.2812	below threshold	16.3593	4.78922	below threshold	15.2848	3.70376	below threshold	16.62	5.55	1.05	cytosol	15.82	2.99	0.99	cytosol	14.22	2.72	0.89	cytosol	Sporulation-specific homolog of the yeast CDC3/10/11/12 family of bud neck microfilament genes; meiotic septin expressed at high levels during meiotic divisions and ascospore formation
YMR154C	RIM13	15.73	3.82347	below threshold	16.3595	3.24431	below threshold	15.1156	3.91066	below threshold	17.52	6.24	1.11	cytosol	16.98	2.64	1.07	cytosol	14.44	2.42	0.91	cytosol	Calpain-like cysteine protease involved in proteolytic activation of Rim101p in response to alkaline pH; has similarity to A. nidulans palB
YIL099W	SGA1	16.05	4.2396	below threshold	16.3605	4.41531	below threshold	15.7532	4.08724	below threshold	16.14	5.89	1	cytosol	17.77	3.97	1.1	cytosol	16.44	6.12	1.02	cytosol	Intracellular sporulation-specific glucoamylase involved in glycogen degradation; induced during starvation of a/a diploids late in sporulation, but dispensable for sporulation
YJR161C	COS5	15.62	3.50742	below threshold	16.3605	3.57134	below threshold	14.8954	3.21439	below threshold	14.91	4.8	0.95	cytosol	14.91	2.07	0.95	cytosol	15.52	3.45	0.99	cytosol	Protein of unknown function, member the DUP380 subfamily of conserved, often subtelomerically-encoded proteins
YJR126C	VPS70	16.36	4.74736	below threshold	16.3616	4.08976	below threshold	NA	NA	technical problem	NA	NA	NA	cytosol	NA	NA	NA	technical problem	NA	NA	NA	punctate	Protein of unknown function involved in vacuolar protein sorting
YMR179W	SPT21	16.22	3.98348	nucleus	16.3655	3.9196	nucleus	16.0849	4.02051	nucleus	17.24	6.72	1.06	nucleus	18.46	4.74	1.13	nucleus	16.28	2.69	1	nucleus	Protein required for normal transcription at several loci including HTA2-HTB2 and HHF2-HHT2, but not required at the other histone loci; functionally related to Spt10p; involved in telomere maintenance
YHR145C	YHR145C	15.89	3.91969	below threshold	16.3659	3.1858	below threshold	15.4284	4.3122	below threshold	15.02	4.37	0.94	cytosol	14.73	3.26	0.92	cytosol	16.54	3.23	1.04	cytosol	Dubious open reading frame unlikely to encode a functional protein, based on available experimental and comparative sequence data
YBR139W	YBR139W	16.54	3.78074	below threshold	16.3684	3.87283	below threshold	16.7459	3.67044	below threshold	17.96	6.32	1.08	cytosol	15.56	2.56	0.94	cytosol	14.37	2.57	0.86	cytosol	Putative serine type carboxypeptidase with a role in phytochelatin synthesis; green fluorescent protein (GFP)-fusion protein localizes to the vacuole; expression induced by nitrogen limitation in a GLN3, GAT1-independent manner
YGR094W	VAS1	16.31	4.12538	below threshold	16.3723	4.60484	below threshold	16.2642	3.88107	below threshold	13.79	4.68	0.84	cytosol	17.78	4.54	1.08	cytosol	16.75	8.64	1.02	cytosol	Mitochondrial and cytoplasmic valyl-tRNA synthetase
YBR241C	YBR241C	14.88	3.92801	below threshold	16.3726	3.71907	below threshold	13.3964	3.64679	below threshold	14.24	5.98	0.95	cytosol	15.8	3.36	1.06	cytosol	18.21	5.84	1.22	cytosol	Putative transporter, member of the sugar porter family; green fluorescent protein (GFP)-fusion protein localizes to the vacuolar membrane; YBR241C is not an essential gene
YGR029W	ERV1	16.46	3.20869	below threshold	16.3783	3.15016	below threshold	16.5592	3.26148	below threshold	17.29	6.59	1.05	cytosol	14.65	3.05	0.89	cytosol	19	8.96	1.15	cytosol	Flavin-linked sulfhydryl oxidase of the mitochondrial intermembrane space (IMS), oxidizes Mia40p as part of a disulfide relay system that promotes IMS retention of imported proteins; ortholog of human hepatopoietin (ALR)
YKL011C	CCE1	16.22	4.53531	mitochondria	16.3786	5.1102	mitochondria	16.0745	4.25252	mitochondria	18.89	5.91	1.16	mitochondria	21.75	4.01	1.34	mitochondria	30.05	8.41	1.85	mitochondria	Mitochondrial cruciform cutting endonuclease, cleaves Holliday junctions formed during recombination of mitochondrial DNA
YHR081W	LRP1	16.16	3.68261	below threshold	16.3816	4.01684	below threshold	15.9451	2.99243	below threshold	15.92	5.33	0.98	cytosol	16.39	2.4	1.01	cytosol	14.24	3.04	0.88	cytosol	Nuclear exosome-associated nucleic acid binding protein; involved in RNA processing, surveillance, degradation, tethering, and export; homolog of mammalian nuclear matrix protein C1D involved in regulation of DNA repair and recombination
YER174C	GRX4	16.36	3.50342	below threshold	16.384	3.31299	below threshold	16.3467	3.72559	below threshold	17.2	5.74	1.05	cytosol	13.22	2.59	0.8	cytosol	17.49	5.66	1.06	cytosol	Hydroperoxide and superoxide-radical responsive glutathione-dependent oxidoreductase; monothiol glutaredoxin subfamily member along with Grx3p and Grx5p; protects cells from oxidative damage
YDL152W	YDL152W	17.15	3.97996	below threshold	16.3858	4.39652	below threshold	17.9388	3.39529	below threshold	20.97	7.85	1.22	cytosol	18.05	4.39	1.05	cytosol	NA	NA	NA	cytosol	Dubious open reading frame unlikely to encode a protein, based on available experimental and comparative sequence data; partially overlaps the verified ORF SAS10/YDL153C, a component of the small ribosomal subunit processosome
YBR098W	MMS4	16.54	5.05243	below threshold	16.3925	4.03449	below threshold	16.6981	5.83496	below threshold	16.58	5.97	1	cytosol	16.59	3.32	1	cytosol	14.11	3.19	0.85	cytosol	Subunit of the structure-specific Mms4p-Mus81p endonuclease that cleaves branched DNA; involved in recombination, DNA repair, and joint molecule formation/resolution during meiotic recombination
YPR026W	ATH1	15.99	3.75067	below threshold	16.3927	4.31261	below threshold	15.6051	3.22687	below threshold	15.8	5.53	0.98	cytosol	19.49	3.82	1.21	cytosol	15.75	5.57	0.98	cytosol	Acid trehalase required for utilization of extracellular trehalose
YPL132W	COX11	16.01	3.94599	below threshold	16.3941	4.47097	below threshold	15.6478	2.92642	below threshold	15.61	5.64	0.97	cytosol	15.53	2.84	0.96	cytosol	16.24	6.31	1.01	cytosol	Mitochondrial inner membrane protein required for delivery of copper to the Cox1p subunit of cytochrome c oxidase; association with mitochondrial ribosomes suggests that copper delivery may occur during translation of Cox1p
YNL303W	YNL303W	15.85	4.29098	below threshold	16.4006	4.03035	below threshold	15.315	4.48546	below threshold	17.32	5.53	1.09	cytosol	17.57	3.59	1.1	cytosol	13.78	3.96	0.86	cytosol	Dubious open reading frame unlikely to encode a protein, based on available experimental and comparative sequence data
YER066W	RRT13	17.3	3.70636	below threshold	16.4008	3.93632	below threshold	18.2154	2.93694	below threshold	15.32	5.73	0.88	cytosol	16.45	2.94	0.95	cytosol	16.52	3.2	0.95	cytosol	Putative protein of unknown function; non-essential gene identified in a screen for mutants with decreased levels of rDNA transcription
YPL094C	SEC62	16.09	3.7418	below threshold	16.4059	3.14963	below threshold	15.7983	4.44978	below threshold	13.56	5.39	0.84	cytosol	14.8	3.52	0.91	cytosol	16.54	3.49	1.02	cytosol	Essential subunit of Sec63 complex (Sec63p, Sec62p, Sec66p and Sec72p); with Sec61 complex, Kar2p/BiP and Lhs1p forms a channel competent for SRP-dependent and post-translational SRP-independent protein targeting and import into the ER
YDR106W	ARP10	16.43	3.97578	below threshold	16.4081	2.89672	below threshold	16.4786	4.67678	below threshold	18.04	5.71	1.09	cytosol	17.23	3.9	1.04	cytosol	16.66	2.67	1.01	cytosol	Component of the dynactin complex, localized to the pointed end of the Arp1p filament; may regulate membrane association of the complex
YDR259C	YAP6	16.86	4.84774	below threshold	16.416	5.04019	below threshold	17.3302	4.66633	below threshold	15.45	5.31	0.91	cytosol	18.91	3.65	1.12	cytosol	28.86	17.83	1.71	cytosol	Putative basic leucine zipper (bZIP) transcription factor; overexpression increases sodium and lithium tolerance; computational analysis suggests a role in regulation of expression of genes involved in carbohydrate metabolism
YGR222W	PET54	16.76	4.26926	below threshold	16.4163	4.14525	below threshold	17.1273	4.33348	below threshold	16.18	5.66	0.96	cytosol	17.77	3.47	1.05	cytosol	17.9	3.61	1.06	cytosol	Mitochondrial inner membrane protein that binds to the 5' UTR of the COX3 mRNA to activate its translation together with Pet122p and Pet494p; also binds to the COX1 Group I intron AI5 beta to facilitate exon ligation during splicing
YGR057C	LST7	17.46	3.55886	below threshold	16.4186	3.46131	below threshold	18.5105	3.44132	below threshold	19.71	7.83	1.12	cytosol	15.15	2.36	0.86	cytosol	19.26	4.86	1.1	cytosol	Protein possibly involved in a post-Golgi secretory pathway; required for the transport of nitrogen-regulated amino acid permease Gap1p from the Golgi to the cell surface
YEL029C	BUD16	14.26	3.3772	below threshold	16.4191	2.68676	below threshold	12.1294	2.99266	below threshold	15.59	4.13	1.09	cytosol	17.22	3	1.2	cytosol	19.71	2.56	1.38	cytosol	Putative pyridoxal kinase, a key enzyme involved in pyridoxal 5'-phosphate synthesis, the active form of vitamin B6; required for genome integrity; involved in bud-site selection; similarity to yeast BUD17 and human pyridoxal kinase (PDXK)
YPL041C	YPL041C	17.28	3.62597	below threshold	16.4196	3.8174	below threshold	18.1672	3.27759	below threshold	17.43	6.6	1	cytosol	14.27	2.62	0.82	cytosol	14.36	3.58	0.83	cytosol	Protein of unknown function involved in maintenance of proper telomere length
YPR088C	SRP54	15.33	3.96169	below threshold	16.4201	4.18635	below threshold	14.2548	3.6329	below threshold	17.14	6.9	1.11	cytosol	16.98	3.71	1.1	cytosol	14.03	5.96	0.91	cytosol	Signal recognition particle (SRP) subunit (homolog of mammalian SRP54); contains the signal sequence-binding activity of SRP, interacts with the SRP RNA, and mediates binding of SRP to signal receptor; contains GTPase domain
YKL177W	YKL177W	16.21	4.4624	below threshold	16.4213	4.59515	below threshold	16.0125	4.29102	below threshold	15.59	5.71	0.96	cytosol	16.84	2.85	1.03	cytosol	15.68	3.36	0.96	cytosol	Dubious open reading frame unlikely to encode a protein, based on available experimental and comparative sequence data; partially overlaps the verified gene STE3
YLR301W	YLR301W	16.39	4.00535	below threshold	16.4279	4.37274	below threshold	16.3642	3.10743	below threshold	18.16	6.92	1.1	cytosol	14.99	2.55	0.91	cytosol	18.02	6.19	1.09	cytosol	Protein of unknown function that interacts with Sec72p
YHL044W	YHL044W	17.48	4.00099	below threshold	16.428	3.76721	below threshold	18.5429	3.9577	below threshold	17.67	6.51	1.01	cytosol	15.49	2.87	0.88	cytosol	16.47	4.12	0.94	cytosol	Putative integral membrane protein, member of DUP240 gene family; green fluorescent protein (GFP)-fusion protein localizes to the plasma membrane in a punctate pattern
YJR138W	IML1	15.73	3.54832	below threshold	16.435	3.56666	below threshold	15.0417	3.41667	below threshold	13.94	4.39	0.88	cytosol	18.43	3.79	1.17	cytosol	15.96	7.61	1.01	cytosol	Protein of unknown function, green fluorescent protein (GFP)-fusion protein localizes to the vacuolar membrane
YKL018C-A	YKL018C-A	17.32	4.91511	below threshold	16.435	5.26342	below threshold	18.2113	4.31946	below threshold	18.39	6.15	1.06	cytosol	22.45	5.76	1.29	cytosol	21.31	10.84	1.23	cytosol	Putative protein of unknown function; identified by homology; green fluorescent protein (GFP)-fusion protein localizes to the cytoplasm
YOR385W	YOR385W	16.12	3.85356	below threshold	16.4412	3.54149	below threshold	15.8036	4.06353	below threshold	17.09	5.47	1.06	cytosol	16.26	2.68	1	cytosol	18.1	2.49	1.12	cytosol	Putative protein of unknown function; green fluorescent protein (GFP)-fusion protein localizes to the cytoplasm; YOR385W is not an essential gene
YGR017W	YGR017W	15.92	3.92421	below threshold	16.4454	4.16833	below threshold	15.4129	3.70073	below threshold	17.06	6.4	1.07	cytosol	15.92	3.84	0.99	cytosol	24.01	4.93	1.5	cytosol	Putative protein of unknown function; green fluorescent protein (GFP)-fusion protein localizes to both the nucleus and the cytoplasm
YBL093C	ROX3	18	4.13315	below threshold	16.4506	3.52493	below threshold	19.553	4.34907	cytosol	16.26	6.52	0.9	cytosol	13.11	3.58	0.72	cytosol	14.38	3.98	0.79	cytosol	Subunit of the RNA polymerase II mediator complex; associates with core polymerase subunits to form the RNA polymerase II holoenzyme
YOL103W	ITR2	16.29	4.40232	below threshold	16.4518	5.03057	below threshold	16.1328	3.52246	below threshold	13.96	4.56	0.85	cytosol	16.14	5.04	0.99	cytosol	14.61	4.01	0.89	cytosol	Myo-inositol transporter with strong similarity to the major myo-inositol transporter Itr1p, member of the sugar transporter superfamily; expressed constitutively
YGL234W	ADE5	16.45	4.03028	below threshold	16.4537	4.08532	below threshold	NA	NA	technical problem	NA	NA	NA	cytosol	NA	NA	NA	technical problem	NA	NA	NA	cytosol	Bifunctional enzyme of the 'de novo' purine nucleotide biosynthetic pathway, contains aminoimidazole ribotide synthetase and glycinamide ribotide synthetase activities
YML133C	YML133C	16.24	3.8124	below threshold	16.4542	4.41489	below threshold	16.0474	2.83054	below threshold	15.03	5.57	0.92	cytosol	19.01	4.19	1.17	cytosol	18.91	9.54	1.16	cytosol	Putative protein of unknown function with similarity to helicases; the authentic, non-tagged protein is detected in highly purified mitochondria in high-throughput studies; YML133C contains an intron
YBR219C	YBR219C	15.32	3.90489	below threshold	16.4549	3.71233	below threshold	14.1914	3.85654	below threshold	15.71	5.71	1.02	cytosol	16.7	3.4	1.09	cytosol	18.16	3.1	1.18	cytosol	Putative protein of unknown function; YBR219C is not an essential gene
YJR021C	REC107	14.36	3.55286	below threshold	16.4549	3.01203	below threshold	12.2783	3.08794	below threshold	15.79	5.05	1.09	cytosol	18.89	3.32	1.31	cytosol	21.3	3.55	1.48	cytosol	Protein involved in early stages of meiotic recombination; involved in coordination between the initiation of recombination and the first division of meiosis; part of a complex (Rec107p-Mei4p-Rec114p) required for ds break formation
YJL163C	YJL163C	16.37	4.59634	below threshold	16.4636	4.57226	below threshold	16.2965	4.62173	below threshold	13.36	4.04	0.81	cytosol	15.3	3.29	0.93	cytosol	24.95	4.08	1.52	cytosol	Putative protein of unknown function
YGR168C	YGR168C	15.57	4.06199	below threshold	16.4657	4.15201	below threshold	14.6865	3.90396	below threshold	17.2	5.56	1.1	cytosol	19.25	3.49	1.23	cytosol	25.16	4.68	1.61	cytosol	Putative protein of unknown function; YGR168C is not an essential gene
YBR047W	FMP23	16.8	3.83512	below threshold	16.4667	4.25147	below threshold	17.1527	3.40577	below threshold	15.15	5.61	0.9	cytosol	17.33	4.48	1.03	cytosol	16.14	4.32	0.96	cytosol	Putative protein of unknown function; proposed to be involved in iron or copper homeostatis; the authentic, non-tagged protein is detected in highly purified mitochondria in high-throughput studies
YOR113W	AZF1	16.62	3.77618	below threshold	16.4682	3.26344	below threshold	16.7999	3.91914	below threshold	16.93	7.29	1.01	cytosol	17.45	3.61	1.04	cytosol	15.15	2.53	0.91	cytosol	Zinc-finger transcription factor, involved in induction of CLN3 transcription in response to glucose; genetic and physical interactions indicate a possible role in mitochondrial transcription or genome maintenance
YFL013C	IES1	15.48	3.62911	below threshold	16.4735	3.41885	below threshold	14.5056	3.55922	below threshold	17.57	6.15	1.13	cytosol	18.65	4.67	1.2	cytosol	15.08	3	0.97	cytosol	Subunit of the INO80 chromatin remodeling complex
YLR411W	CTR3	15.35	4.38454	below threshold	16.4741	4.72044	below threshold	14.2406	3.96603	below threshold	15.63	5.25	1.01	cytosol	15.18	2.79	0.98	cytosol	16.69	4.91	1.08	cytosol	High-affinity copper transporter of the plasma membrane, acts as a trimer; gene is disrupted by a Ty2 transposon insertion in many laboratory strains of S. cerevisiae
YPR095C	SYT1	15.82	3.36733	below threshold	16.4777	3.46547	below threshold	15.1803	3.11266	below threshold	14.56	4.74	0.92	cytosol	17.05	2.92	1.07	cytosol	17.02	9.25	1.07	cytosol	Guanine nucleotide exchange factor (GEF) for Arf proteins; involved in vesicular transport; suppressor of ypt3 mutations; member of the Sec7-domain family
YKL070W	YKL070W	16.82	3.11842	below threshold	16.4808	2.93461	below threshold	17.1755	3.24615	below threshold	15.26	5.05	0.9	cytosol	15.34	2.52	0.91	cytosol	17.58	2.34	1.04	cytosol	Putative protein of unknown function; expression induced in cells treated with mycotoxins patulin or citrinin; the authentic, non-tagged protein is detected in highly purified mitochondria in high-throughput studies
YCR087W	YCR087W	17.43	3.41658	below threshold	16.4822	3.13036	below threshold	18.3806	3.50795	below threshold	15	5.91	0.86	cytosol	16.5	3.47	0.94	cytosol	14.44	3.44	0.82	cytosol	Dubious open reading frame unlikely to encode a protein, based on available experimental and comparative sequence data; partially overlaps uncharacterized gene YCR087C-A; YCR087W is not an essential gene
YPL040C	ISM1	15.97	3.6056	below threshold	16.4845	3.48127	below threshold	15.4667	3.67139	below threshold	NA	NA	NA	technical problem	19.04	2.91	1.19	cytosol	15.86	4.06	0.99	cytosol	Mitochondrial isoleucyl-tRNA synthetase, null mutant is deficient in respiratory growth
YGR022C	YGR022C	16.84	3.78722	below threshold	16.486	4.02361	below threshold	17.2013	3.29151	below threshold	15.08	7.73	0.89	cytosol	17.72	3.78	1.05	cytosol	15.8	3.04	0.93	cytosol	Dubious open reading frame unlikely to encode a protein, based on available experimental and comparative sequence data; overlaps almost completely with the verified ORF MTL1/YGR023W
YPL036W	PMA2	16.72	6.39984	below threshold	16.486	5.81913	below threshold	16.9796	7.00038	below threshold	19.93	14.32	1.19	cytosol	19.4	6.04	1.15	cytosol	54.62	27.3	3.26	vacuole,cell periphery	Plasma membrane H+-ATPase, isoform of Pma1p, involved in pumping protons out of the cell; regulator of cytoplasmic pH and plasma membrane potential
YPL179W	PPQ1	16.26	3.717	below threshold	16.4862	3.08766	below threshold	16.0584	4.03688	below threshold	22.37	7.67	1.37	cytosol	16.46	3.81	1.01	cytosol	17.74	5.93	1.09	cytosol	Putative protein serine/threonine phosphatase; null mutation enhances efficiency of translational suppressors
YGR213C	RTA1	16.11	3.96497	below threshold	16.4874	4.58753	below threshold	15.7412	3.61017	below threshold	26.1	14.67	1.62	cytosol	20.31	4.3	1.26	cytosol	16.44	3.37	1.02	cytosol	Protein involved in 7-aminocholesterol resistance; has seven potential membrane-spanning regions; expression is induced under both low-heme and low-oxygen conditions; member of the fungal lipid-translocating exporter (LTE) family of protein
YDL154W	MSH5	14.3	3.89018	below threshold	16.4935	3.45446	below threshold	12.1152	3.29691	below threshold	17.43	6.31	1.21	cytosol	14.43	3.1	1	cytosol	17.22	3.79	1.2	cytosol	Protein of the MutS family, forms a dimer with Msh4p that facilitates crossovers between homologs during meiosis; msh5-Y823H mutation confers tolerance to DNA alkylating agents; homologs present in C. elegans and humans
YLL046C	RNP1	16.8	3.80949	below threshold	16.5012	4.03621	below threshold	17.1176	3.53743	below threshold	16.79	6.55	0.99	cytosol	15.12	2.8	0.89	cytosol	17.18	4.79	1.02	cytosol	Ribonucleoprotein that contains two RNA recognition motifs (RRM)
YMR046W-A	YMR046W-A	17.13	4.3376	below threshold	16.5028	4.38936	below threshold	17.7766	4.27308	below threshold	14.89	6.15	0.86	cytosol	15.69	3.72	0.91	cytosol	14.79	3.81	0.86	cytosol	Dubious open reading frame unlikely to encode a functional protein, based on available experimental and comparative sequence data
YOL061W	PRS5	15.96	3.85359	below threshold	16.5053	2.50602	below threshold	15.421	4.03422	below threshold	17.51	5.52	1.09	cytosol	15.99	2.94	1	cytosol	12.73	2.28	0.79	cytosol	5-phospho-ribosyl-1(alpha)-pyrophosphate synthetase, synthesizes PRPP, which is required for nucleotide, histidine, and tryptophan biosynthesis; one of five related enzymes, which are active as heteromultimeric complexes
YDL221W	YDL221W	16.73	3.86462	below threshold	16.506	4.17874	below threshold	16.9657	3.18902	below threshold	15.4	6.98	0.92	cytosol	17.19	3.9	1.02	cytosol	14.46	2.55	0.86	cytosol	Dubious open reading frame unlikely to encode a protein, based on available experimental and comparative sequence data; partially overlaps the 3' end of essential gene CDC13
YDL086W	YDL086W	16.35	3.66097	below threshold	16.5075	3.61381	below threshold	16.2092	3.72865	below threshold	17.92	7.1	1.09	cytosol	17.37	4.07	1.06	cytosol	16.83	4.28	1.02	cytosol	Putative protein of unknown function; the authentic, non-tagged protein is detected in highly purified mitochondria in high-throughput studies; YDL086W is not an essential gene
YMR244C-A	YMR244C-A	16.6	3.27298	below threshold	16.5081	2.74986	below threshold	16.7038	3.78151	below threshold	15.23	7.04	0.91	cytosol	17.96	4.01	1.08	cytosol	16.88	3.36	1.01	cytosol	Putative protein of unknown function; green fluorescent protein (GFP)-fusion protein localizes to both the cytoplasm and nucleus and is induced in response to the DNA-damaging agent MMS; YMR244C-A is not an essential gene
YHR002W	LEU5	14.92	3.70976	mitochondria	16.5085	3.57853	mitochondria	13.3404	3.2372	mitochondria	16.9	5.7	1.13	mitochondria	14.51	2.88	0.97	mitochondria	22.43	3.71	1.5	mitochondria	Mitochondrial carrier protein involved in the accumulation of CoA in the mitochondrial matrix; homolog of human Graves disease protein; does not encode an isozyme of Leu4p, as first hypothesized
YOL063C	CRT10	14.75	4.09749	below threshold	16.5101	3.9051	below threshold	13.0083	3.70552	below threshold	17.97	6.73	1.21	cytosol	13.8	3.05	0.93	cytosol	16.78	6.43	1.13	cytosol	Protein involved in transcriptional regulation of RNR2 and RNR3; expression of the gene is induced by DNA damage and null mutations confer increased resistance to hydroxyurea; N-terminal region has a leucine repeat and a WD40 repeat
YOR080W	DIA2	15.74	4.22863	below threshold	16.5127	3.76202	below threshold	14.976	4.45187	below threshold	18.11	8.8	1.15	cytosol	20.59	4	1.3	cytosol	15.5	5.19	0.98	cytosol	Origin-binding F-box protein that forms an SCF ubiquitin ligase complex with Skp1p and Cdc53p; plays a role in DNA replication, involved in invasive and pseudohyphal growth
YFR043C	IRC6	16.26	3.61037	below threshold	16.5132	3.89756	below threshold	16.0222	3.19296	below threshold	17.61	5.23	1.08	cytosol	15.25	3.67	0.93	cytosol	16.36	3.67	1	cytosol	Putative protein of unknown function; null mutant displays increased levels of spontaneous Rad52p foci
YOR271C	FSF1	15.34	4.25511	below threshold	16.5205	4.5407	below threshold	14.167	3.49654	below threshold	14.32	5.18	0.93	cytosol	13.71	2.86	0.89	cytosol	17	7.34	1.1	cytosol	Putative protein, predicted to be an alpha-isopropylmalate carrier; belongs to the sideroblastic-associated protein family; non-tagged protein is detected in purified mitochondria; likely to play a role in iron homeostasis
YDL137W	ARF2	15.33	4.06431	below threshold	16.5208	4.27527	below threshold	14.1414	3.78387	below threshold	15.06	5.28	0.98	cytosol	15.56	2.82	1.01	cytosol	17.05	4.68	1.11	cytosol	ADP-ribosylation factor, GTPase of the Ras superfamily involved in regulation of coated formation vesicles in intracellular trafficking within the Golgi; functionally interchangeable with Arf1p
YBL071C	YBL071C	16.89	3.99296	below threshold	16.5258	3.90755	below threshold	17.2662	4.18931	below threshold	16.63	5.64	0.98	cytosol	16.53	3.22	0.97	cytosol	15.03	3.03	0.88	cytosol	Dubious open reading frame, predicted protein contains a peroxisomal targeting signal
YNR014W	YNR014W	16.91	4.15992	below threshold	16.5259	4.26342	below threshold	17.3159	4.08824	below threshold	16.7	6.81	0.98	cytosol	15.64	2.92	0.92	cytosol	16.12	3.95	0.95	cytosol	Putative protein of unknown function; expression is cell-cycle regulated, Azf1p-dependent, and heat-inducible
YJL122W	ALB1	16.22	3.32815	below threshold	16.5308	3.45376	below threshold	15.9184	3.08379	below threshold	15.09	5.56	0.93	cytosol	15.67	4.31	0.96	cytosol	14.46	5.4	0.89	cytosol	Shuttling pre-60S factor; involved in the biogenesis of ribosomal large subunit; interacts directly with Arx1p; responsible for Tif6p recycling defects in absence of Rei1p
YPL030W	TRM44	15.56	4.22052	below threshold	16.5323	4.49203	below threshold	14.6053	3.95014	below threshold	15.38	5.44	0.98	cytosol	14.92	3.3	0.95	cytosol	15.61	3.41	1	cytosol	tRNA(Ser) Um(44) 2'-O-methyltransferase; involved in maintaining levels of the tRNA-Ser species tS(CGA) and tS(UGA); conserved among metazoans and fungi but there does not appear to be a homolog in plants; TRM44 is a non-essential gene
YPL123C	RNY1	15.94	3.67606	below threshold	16.5323	3.4594	below threshold	15.3651	3.75023	below threshold	16.05	6.51	1	cytosol	17.81	2.93	1.11	cytosol	13.4	2.36	0.84	cytosol	Vacuolar RNase of the T(2) family, relocalizes to the cytosol where it cleaves tRNAs upon oxidative or stationary phase stress; promotes apoptosis under stress conditions and this function is independent of its catalytic activity
YBL078C	ATG8	16.62	4.19876	below threshold	16.5342	4.27771	below threshold	16.7289	4.12311	below threshold	15.42	5.47	0.92	cytosol	15.28	3	0.91	cytosol	15.24	4.31	0.91	cytosol	Component of autophagosomes and Cvt vesicles; undergoes conjugation to phosphatidylethanolamine (PE); Atg8p-PE is anchored to membranes, is involved in phagophore expansion, and may mediate membrane fusion during autophagosome formation
YOR004W	UTP23	15.68	4.35522	below threshold	16.5358	4.69107	below threshold	14.8321	4.19947	below threshold	16.19	6.28	1.03	cytosol	16.42	3.91	1.04	cytosol	18.47	2.69	1.17	cytosol	Essential nucleolar protein that is a component of the SSU (small subunit) processome involved in 40S ribosomal subunit biogenesis; has homology to PINc domain protein Fcf1p, although the PINc domain of Utp23p is not required for function
YDR475C	JIP4	16.08	4.09443	below threshold	16.5363	4.36159	below threshold	15.6403	3.83372	below threshold	17.83	6.36	1.1	cytosol	16.46	4.04	1.02	cytosol	18.23	3.67	1.13	cytosol	Protein of unknown function; previously annotated as two separate ORFs, YDR474C and YDR475C, which were merged as a result of corrections to the systematic reference sequence
YDL142C	CRD1	16	4.11234	below threshold	16.5423	4.10156	below threshold	15.4883	4.05246	below threshold	15.13	6.75	0.94	cytosol	14.33	3.05	0.89	cytosol	20.59	5.43	1.28	cytosol	Cardiolipin synthase; produces cardiolipin, which is a phospholipid of the mitochondrial inner membrane that is required for normal mitochondrial membrane potential and function; also required for normal vacuolar ion homeostasis
YDR351W	SBE2	16.51	4.82163	below threshold	16.5461	4.93248	below threshold	16.4914	4.72748	below threshold	13.33	4.17	0.8	cytosol	15.33	2.86	0.92	cytosol	16.33	3.25	0.98	cytosol	Protein involved in the transport of cell wall components from the Golgi to the cell surface; required for bud growth
YHR093W	AHT1	17.48	3.58116	below threshold	16.552	2.85722	below threshold	18.4174	3.75538	below threshold	14.62	5.41	0.83	cytosol	16.7	3.69	0.95	cytosol	18.46	2.37	1.05	cytosol	Dubious open reading frame, unlikely to encode a protein; not conserved in closely related Saccharomyces species; multicopy suppressor of glucose transport defects, likely due to the presence of an HXT4 regulatory element in the region
YDR316W	OMS1	16.71	3.45667	below threshold	16.5524	3.09758	below threshold	16.8772	3.69339	below threshold	16.82	8.96	1	cytosol	17.08	3.03	1.02	cytosol	15.22	3.02	0.91	cytosol	Protein integral to the mitochondrial membrane; has a conserved methyltransferase motif; multicopy suppressor of respiratory defects caused by OXA1 mutations
YFL011W	HXT10	16.49	4.17391	below threshold	16.5561	4.33278	below threshold	16.4336	4.07241	below threshold	14.61	5.04	0.88	cytosol	15.48	4.76	0.93	cytosol	17.06	3.07	1.03	cytosol	Putative hexose transporter, expressed at low levels and expression is repressed by glucose
YMR087W	YMR087W	16.24	3.76556	below threshold	16.5564	3.83022	below threshold	15.9428	3.65924	below threshold	17.52	5.92	1.07	cytosol	18.1	3.4	1.11	cytosol	18.11	4.44	1.11	cytosol	Putative ADP-ribose-1''-monophosphatase that converts ADP-ribose-1''-monophosphate to ADP-ribose; may have a role in tRNA splicing; contains an A1pp domain
YJL118W	YJL118W	17.3	4.14016	below threshold	16.5586	4.39197	below threshold	18.0528	3.63812	below threshold	19.32	6.92	1.11	cytosol	14.08	2.8	0.81	cytosol	15.13	7.32	0.87	cytosol	Putative protein of unknown function; may interact with ribosomes, based on co-purification experiments; YJL18W is a non-essential gene; deletion enhances the toxicity of heterologously expressed human alpha-synuclein
YPR197C	YPR197C	17.19	3.6105	below threshold	16.5586	3.98154	below threshold	17.8419	3.09793	below threshold	15.74	4.39	0.91	cytosol	15.87	3.45	0.92	cytosol	17.66	4.26	1.02	cytosol	Dubious open reading frame unlikely to encode a functional protein, based on available experimental and comparative sequence data
YGL214W	YGL214W	17.49	3.74495	below threshold	16.5587	3.76581	below threshold	18.4302	3.50357	below threshold	14.14	5.19	0.8	cytosol	18.09	2.96	1.03	cytosol	17.77	4.71	1.01	cytosol	Dubious open reading frame unlikely to encode a protein, based on available experimental and comparative sequence data; deletion mutation phenotype is likely due to the overlapping verified ORF SKI8/YGL213C
YBR201W	DER1	16.5	3.72586	below threshold	16.5601	3.90351	below threshold	16.4486	3.49376	below threshold	19.17	6.91	1.16	cytosol	14.12	2.87	0.85	cytosol	19.6	7.94	1.18	cytosol	Endoplasmic reticulum membrane protein, required for ER-associated protein degradation of misfolded or unassembled proteins; N- and C- termini protrude into the cytoplasm, has similarity to Dfm1p
YBR008C	FLR1	16.26	4.76134	below threshold	16.5609	4.80919	below threshold	15.9723	4.65414	below threshold	15.34	4.94	0.94	cytosol	23.25	12.83	1.42	cytosol	18.25	3.61	1.12	cytosol	Plasma membrane multidrug transporter of the major facilitator superfamily, involved in efflux of fluconazole, diazaborine, benomyl, methotrexate, and other drugs; expression induced in cells treated with the mycotoxin patulin
YMR033W	ARP9	15.94	4.18723	below threshold	16.562	3.35202	below threshold	15.3262	4.39232	below threshold	19.07	13.55	1.19	cytosol	17.21	3.51	1.07	cytosol	15.94	2.51	1	cytosol	Component of both the SWI/SNF and RSC chromatin remodeling complexes; actin-related protein involved in transcriptional regulation
YMR281W	GPI12	16.55	4.74245	below threshold	16.5626	5.02841	below threshold	NA	NA	technical problem	NA	NA	NA	cytosol	NA	NA	NA	cytosol	NA	NA	NA	technical problem	ER membrane protein involved in the second step of glycosylphosphatidylinositol (GPI) anchor assembly, the de-N-acetylation of the N-acetylglucosaminylphosphatidylinositol intermediate; functional homolog of human PIG-Lp
YMR151W	YIM2	15.29	4.33446	below threshold	16.566	4.35281	below threshold	14.0204	4.04493	below threshold	15.88	6	1.03	cytosol	15.67	3.47	1.02	cytosol	16.74	4.04	1.09	cytosol	Dubious open reading frame, unlikely to encode a protein; not conserved in closely related Saccharomyces species; 5% of ORF overlaps the verified gene IMP1
YOL029C	YOL029C	15.91	2.86761	below threshold	16.5671	2.68723	below threshold	15.2885	3.02163	below threshold	14.81	5.66	0.92	cytosol	17.57	3.71	1.1	cytosol	16.67	3.72	1.04	cytosol	Putative protein of unknown function; identified as interacting with Hsc82p and Hsp82p in high-throughput two-hybrid screens
YOR365C	YOR365C	15.92	3.5707	below threshold	16.5678	3.46622	below threshold	15.293	3.54966	below threshold	17.47	5.61	1.09	cytosol	18.53	3.73	1.16	cytosol	16.84	5.95	1.05	cytosol	Putative protein of unknown function; YOR365C is not an essential protein
YOR178C	GAC1	16.55	3.96786	below threshold	16.5699	3.94254	below threshold	NA	NA	technical problem	NA	NA	NA	ambiguous	NA	NA	NA	ambiguous	NA	NA	NA	ambiguous	Regulatory subunit for Glc7p type-1 protein phosphatase (PP1), tethers Glc7p to Gsy2p glycogen synthase, binds Hsf1p heat shock transcription factor, required for induction of some HSF-regulated genes under heat shock
YBL104C	YBL104C	15.01	3.3772	below threshold	16.5705	3.05356	below threshold	13.4626	3.1034	below threshold	14.09	5.22	0.93	cytosol	15.06	3.21	1	cytosol	15.5	2.55	1.03	cytosol	Putative protein of unknown function, promoter contains multiple GCN4 binding sites
YOR393W	ERR1	15	3.82797	below threshold	16.578	3.68086	below threshold	13.43	3.48571	below threshold	15.77	6.27	1.05	cytosol	15.8	2.67	1.05	cytosol	16.71	6.38	1.11	cytosol	Protein of unknown function, has similarity to enolases
YMR190C	SGS1	16.29	3.3118	below threshold	16.5785	3.58524	below threshold	16.0203	2.94462	below threshold	15.65	5.3	0.96	cytosol	19.56	3.66	1.2	cytosol	16.5	7.05	1.01	cytosol	Nucleolar DNA helicase of the RecQ family involved in genome integrity maintenance; regulates chromosome synapsis and meiotic joint molecule/crossover formation; similar to human BLM and WRN proteins implicated in Bloom and Werner syndromes
YGL237C	HAP2	15.97	3.8836	below threshold	16.5811	3.25223	below threshold	15.3628	3.98561	below threshold	16.96	5.06	1.06	cytosol	17.28	3.08	1.08	cytosol	20.2	4.09	1.26	cytosol	Subunit of the heme-activated, glucose-repressed Hap2p/3p/4p/5p CCAAT-binding complex, a transcriptional activator and global regulator of respiratory gene expression; contains sequences sufficient for both complex assembly and DNA binding
YMR063W	RIM9	18.47	4.43548	below threshold	16.5812	3.73541	below threshold	20.36	4.35866	cytosol	17.37	6.62	0.94	cytosol	14.83	2.91	0.8	cytosol	18.16	3.13	0.98	cytosol	Protein of unknown function, involved in the proteolytic activation of Rim101p in response to alkaline pH; has similarity to A. nidulans PalI; putative membrane protein
YDR274C	YDR274C	16.75	3.18563	below threshold	16.5816	2.79305	below threshold	16.9482	3.30614	below threshold	16.05	4.91	0.95	cytosol	14.17	2.62	0.84	cytosol	14.79	4.65	0.88	cytosol	Dubious open reading frame unlikely to encode a functional protein, based on available experimental and comparative sequence data
YDR388W	RVS167	16.57	4.73407	below threshold	16.5833	4.74156	below threshold	16.5701	4.72788	below threshold	19.23	6.7	1.16	cytosol	17.02	3.04	1.02	cytosol	16.16	6.02	0.97	cytosol	Actin-associated protein, interacts with Rvs161p to regulate actin cytoskeleton, endocytosis, and viability following starvation or osmotic stress; homolog of mammalian amphiphysin
YMR191W	SPG5	15.03	3.44284	below threshold	16.5838	3.4268	below threshold	13.4936	3.04481	below threshold	16.8	5.94	1.11	cytosol	17.05	3.1	1.13	cytosol	16.49	4.71	1.09	cytosol	Protein required for survival at high temperature during stationary phase; not required for growth on nonfermentable carbon sources
YLR288C	MEC3	16.27	3.33057	below threshold	16.5876	3.36922	below threshold	15.9635	3.27097	below threshold	18.51	6.24	1.13	cytosol	16.93	3.21	1.04	cytosol	13.99	3.32	0.86	cytosol	DNA damage and meiotic pachytene checkpoint protein; subunit of a heterotrimeric complex (Rad17p-Mec3p-Ddc1p) that forms a sliding clamp, loaded onto partial duplex DNA by a clamp loader complex; homolog of human and S. pombe Hus1
YDL169C	UGX2	17.52	4.45739	below threshold	16.5914	4.58905	below threshold	18.4562	4.19132	below threshold	18.01	11.61	1.02	cytosol	16.67	3.13	0.95	cytosol	22.37	6.15	1.27	cytosol	Protein of unknown function, transcript accumulates in response to any combination of stress conditions
YGR113W	DAM1	15.22	4.06695	below threshold	16.5924	3.95554	below threshold	13.8657	3.67213	below threshold	17.07	4.88	1.12	cytosol	16.52	3.88	1.08	cytosol	16.38	6.31	1.07	cytosol	Essential subunit of the Dam1 complex (aka DASH complex), couples kinetochores to the force produced by MT depolymerization thereby aiding in chromosome segregation; Ipl1p target for regulating kinetochore-MT attachments
YKL010C	UFD4	15.54	3.62298	below threshold	16.5925	3.5942	below threshold	14.5086	3.46573	below threshold	14.78	4.15	0.95	cytosol	18.28	3.27	1.17	cytosol	15.69	2.65	1	cytosol	Ubiquitin-protein ligase (E3) that interacts with Rpt4p and Rpt6p, two subunits of the 19S particle of the 26S proteasome; cytoplasmic E3 involved in the degradation of ubiquitin fusion proteins
YCR007C	YCR007C	17	3.35331	below threshold	16.5932	3.24931	below threshold	17.4167	3.99764	below threshold	17.68	7.04	1.04	cytosol	14.62	3.18	0.86	cytosol	15.6	2.41	0.91	cytosol	Putative integral membrane protein, member of DUP240 gene family; YCR007C is not an essential gene
YNL104C	LEU4	15.74	4.05768	below threshold	16.5932	3.54808	below threshold	14.9029	4.16805	below threshold	17.01	5.75	1.08	cytosol	15.95	4.12	1.01	cytosol	14.81	2.75	0.94	cytosol	Alpha-isopropylmalate synthase (2-isopropylmalate synthase); the main isozyme responsible for the first step in the leucine biosynthesis pathway
YLR273C	PIG1	16.54	3.10452	below threshold	16.5955	3.02947	below threshold	16.5037	3.11736	below threshold	17.13	6.63	1.03	cytosol	19.52	3.72	1.17	cytosol	19.93	3.52	1.2	cytosol	Putative targeting subunit for the type-1 protein phosphatase Glc7p that tethers it to the Gsy2p glycogen synthase
YFL056C	AAD6	17.18	4.32175	below threshold	16.5962	4.35227	below threshold	17.7868	4.20786	below threshold	18.49	6.38	1.07	cytosol	20.06	19.06	1.16	cytosol	16.68	6.03	0.97	cytosol	Putative aryl-alcohol dehydrogenase with similarity to P. chrysosporium aryl-alcohol dehydrogenase, involved in the oxidative stress response; expression induced in cells treated with the mycotoxin patulin
YHR176W	FMO1	14.57	4.63523	below threshold	16.5992	4.46323	below threshold	12.5556	3.90772	below threshold	15.25	5.16	1.04	cytosol	15.44	3.64	1.05	cytosol	17.19	4.93	1.17	cytosol	Flavin-containing monooxygenase, localized to the cytoplasmic face of the ER membrane; catalyzes oxidation of biological thiols to maintain the ER redox buffer ratio for correct folding of disulfide-bonded proteins
YCR093W	CDC39	16.38	4.41181	below threshold	16.6	4.78317	below threshold	16.1715	4.33188	below threshold	14.47	8.79	0.88	cytosol	21.66	4.87	1.32	cytosol	NA	NA	NA	cytosol	Component of the CCR4-NOT complex, which has multiple roles in regulating mRNA levels including regulation of transcription and destabilizing mRNAs by deadenylation; basal transcription factor
YOR151C	RPB2	15.28	3.73576	below threshold	16.6	3.35253	below threshold	13.9648	3.73101	below threshold	NA	NA	NA	technical problem	17.05	3.77	1.11	cytosol	16.24	3.62	1.06	cytosol	RNA polymerase II second largest subunit B150, part of central core; similar to bacterial beta subunit
YBR224W	YBR224W	17.1	3.79026	below threshold	16.6066	3.81033	below threshold	17.6063	3.71437	below threshold	14.6	6.33	0.85	cytosol	14.55	2.36	0.85	cytosol	16.38	2.83	0.95	cytosol	Dubious open reading frame unlikely to encode a protein, based on available experimental and comparative sequence data; partially overlaps the verified gene TDP1
YAL065C	YAL065C	15.78	3.98954	below threshold	16.6093	4.18073	below threshold	14.9626	3.85225	below threshold	15.22	6.04	0.96	cytosol	14.49	3.63	0.91	cytosol	24.11	4.34	1.52	cytosol	Putative protein of unknown function; has homology to FLO1; possible pseudogene
YER060W	FCY21	16.78	3.96298	below threshold	16.6102	3.67278	below threshold	16.9656	4.26684	below threshold	13.93	3.78	0.82	cytosol	15.23	3.06	0.9	cytosol	16.95	3.09	1	cytosol	Putative purine-cytosine permease, very similar to Fcy2p but cannot substitute for its function
YOR119C	RIO1	15.9	3.7069	below threshold	16.6108	3.78453	below threshold	15.2062	3.50549	below threshold	18.72	5.01	1.17	cytosol	17.23	2.59	1.08	cytosol	14.64	5.31	0.92	cytosol	Essential serine kinase involved in cell cycle progression and processing of the 20S pre-rRNA into mature 18S rRNA
YLR158C	ASP3-3	15.63	3.86305	below threshold	16.6114	3.51213	below threshold	14.6589	4.01092	below threshold	17.66	5.14	1.12	cytosol	17.59	2.7	1.12	cytosol	28.79	6.3	1.84	cytosol	Cell-wall L-asparaginase II, involved in asparagine catabolism; expression is induced during nitrogen starvation; four copies of ASP3 are present in the genome reference strain S288C
YLR006C	SSK1	16.03	3.45541	below threshold	16.6129	3.59026	below threshold	15.4634	3.23544	below threshold	17.65	5.93	1.1	cytosol	18.4	3.28	1.14	cytosol	16.06	3.45	1	cytosol	Cytoplasmic response regulator, part of a two-component signal transducer that mediates osmosensing via a phosphorelay mechanism; dephosphorylated form is degraded by the ubiquitin-proteasome system; potential Cdc28p substrate
YHL006C	SHU1	17.14	3.83921	below threshold	16.6165	3.92441	below threshold	17.6711	3.71693	below threshold	15.22	5.06	0.88	cytosol	15.79	3	0.92	cytosol	16.67	4.7	0.97	cytosol	Protein involved in a Rad51p-, Rad54p-dependent pathway for homologous recombination repair, important for error-free repair of spontaneous and induced DNA lesions to protect the genome from mutation; associates with Shu2p, Psy3p, and Csm2p
YPR202W	YPR202W	16.38	4.36318	below threshold	16.6167	4.16291	below threshold	16.1574	4.48971	below threshold	16.58	5.88	1.01	cytosol	16.66	3.47	1.01	cytosol	17.3	2.55	1.05	cytosol	Putative protein of unknown function with similarity to telomere-encoded helicases; YPR202W is not an essential gene; transcript is predicted to be spliced but there is no evidence that it is spliced in vivo
YCL036W	GFD2	15.27	3.8323	below threshold	16.6182	3.88456	below threshold	13.9364	3.61728	below threshold	18	6.19	1.17	cytosol	17.51	3.8	1.14	cytosol	15.13	3.23	0.99	cytosol	Protein of unknown function, identified as a high-copy suppressor of a dbp5 mutation
YLL067C	YLL067C	16.62	3.43784	below threshold	16.6225	3.35673	below threshold	16.624	3.53561	below threshold	15.73	5.93	0.94	cytosol	17.9	3.25	1.07	cytosol	15.63	3.57	0.94	cytosol	Putative protein of unknown function with similarity to helicases
YDR104C	SPO71	16.74	3.59823	below threshold	16.6225	3.76032	below threshold	16.874	3.46373	below threshold	14.75	5.66	0.88	cytosol	19.24	3.34	1.14	cytosol	16.91	4.57	1.01	cytosol	Meiosis-specific protein of unknown function, required for spore wall formation during sporulation; dispensable for both nuclear divisions during meiosis
YMR057C	YMR057C	16.81	3.7703	below threshold	16.6245	3.08495	below threshold	17.0105	4.33876	below threshold	16.38	6.3	0.97	cytosol	17.2	4.16	1.02	cytosol	16.22	3.98	0.96	cytosol	Dubious open reading frame unlikely to encode a protein, based on available experimental and comparative sequence data; partially overlaps verified ORF AAC1
YJL065C	DLS1	17.34	3.77514	below threshold	16.625	3.88403	below threshold	18.0729	3.50121	below threshold	14.82	5.23	0.85	cytosol	15.26	2.94	0.87	cytosol	14.27	2.5	0.82	cytosol	Subunit of ISW2/yCHRAC chromatin accessibility complex along with Itc1p, Isw2p, and Dpb4p; involved in inheritance of telomeric silencing
YML122C	YML122C	16.87	3.60415	below threshold	16.6252	3.78887	below threshold	17.1223	3.47993	below threshold	17.54	7.97	1.03	cytosol	15.47	3.31	0.91	cytosol	14.87	3.39	0.88	cytosol	Dubious open reading frame unlikely to encode a protein, based on available experimental and comparative sequence data
YLR445W	YLR445W	16.47	4.29082	below threshold	16.6255	5.01811	below threshold	16.3265	3.85905	below threshold	17.3	6.39	1.05	cytosol	16.56	3.47	1	cytosol	17.21	5.18	1.04	cytosol	Putative protein of unknown function; transcription is regulated by Ume6p and induced in response to alpha factor
YGL196W	DSD1	17.25	4.37717	below threshold	16.6269	3.78119	below threshold	17.8843	4.74977	below threshold	17.15	6.26	0.99	cytosol	18.17	3.92	1.05	cytosol	19.65	6.18	1.13	cytosol	D-serine dehydratase (aka D-serine ammonia-lyase); converts D-serine to pyruvate and ammonia by a reaction dependent on pyridoxal 5'-phosphate and zinc; may play a role in D-serine detoxification; L-serine is not a substrate
YKL116C	PRR1	16.19	4.57488	below threshold	16.6297	3.71556	below threshold	15.7659	4.77282	below threshold	19.28	6.47	1.19	cytosol	15.99	2.86	0.98	cytosol	14.25	2.5	0.88	cytosol	Serine/threonine protein kinase that inhibits pheromone induced signalling downstream of MAPK, possibly at the level of the Ste12p transcription factor
YJL214W	HXT8	16.41	4.25104	below threshold	16.6343	4.26939	below threshold	16.1938	4.20639	below threshold	14.46	5.22	0.88	cytosol	13.34	3.28	0.81	cytosol	15.55	3.31	0.94	cytosol	Protein of unknown function with similarity to hexose transporter family members, expression is induced by low levels of glucose and repressed by high levels of glucose
YJL006C	CTK2	15.69	3.35186	below threshold	16.6391	2.89811	below threshold	14.7614	3.36056	below threshold	18.18	5.57	1.15	cytosol	15.97	3.35	1.01	cytosol	16.27	2.38	1.03	cytosol	Beta subunit of C-terminal domain kinase I (CTDK-I), which phosphorylates both RNA pol II subunit Rpo21p to affect transcription and pre-mRNA 3' end processing, and ribosomal protein Rps2p to increase translational fidelity
YIL157C	COA1	16.8	4.29462	below threshold	16.6418	4.39122	below threshold	16.9669	3.8918	below threshold	15.34	5.42	0.91	cytosol	15.25	2.52	0.9	cytosol	15.34	6.04	0.91	cytosol	Mitochondrial inner membrane protein required for assembly of the cytochrome c oxidase complex (complex IV); interacts with complex IV assembly factor Shy1p during the early stages of assembly
YMR322C	SNO4	17.65	3.86475	below threshold	16.644	3.83215	below threshold	18.6727	3.69853	below threshold	18.46	6.5	1.04	cytosol	14.23	2.28	0.8	cytosol	15.67	4.48	0.88	cytosol	Possible chaperone and cysteine protease, similar to bacterial Hsp31 and yeast Hsp31p, Hsp32p, and Hsp33p; DJ-1/ThiJ/PfpI superfamily member; predicted involvement in pyridoxine metabolism; induced by mild heat stress and copper deprivation
YJL161W	FMP33	16.85	3.82962	below threshold	16.6478	4.07303	below threshold	17.08	3.26545	below threshold	16.07	6.74	0.95	cytosol	15.22	2.92	0.9	cytosol	18.78	2.49	1.11	cytosol	Putative protein of unknown function; the authentic, non-tagged protein is detected in highly purified mitochondria in high-throughput studies
YLR443W	ECM7	16.36	4.4602	below threshold	16.6495	4.40824	below threshold	16.0929	4.48967	below threshold	14.83	4.34	0.9	cytosol	16.82	2.56	1.02	cytosol	16.76	3.68	1.02	cytosol	Non-essential putative integral membrane protein; mutant has cell wall defects; transcription is induced under conditions of zinc deficiency
YOL001W	PHO80	16.85	4.17492	nucleus	16.651	4.4991	nucleus	17.0627	2.72133	nucleus	17.67	5.66	1.04	nucleus	18.78	3.39	1.11	nucleus	19.1	2.03	1.13	nucleus	Cyclin, interacts with cyclin-dependent kinase Pho85p; regulates the response to nutrient levels and environmental conditions, including the response to phosphate limitation and stress-dependent calcium signaling
YIR018W	YAP5	16.32	3.1635	below threshold	16.6523	3.70913	below threshold	16.0017	2.69665	below threshold	17.73	6.32	1.08	cytosol	14.67	2.18	0.89	cytosol	15.95	2.89	0.97	cytosol	Basic leucine zipper (bZIP) transcription factor
YNL213C	RRG9	20.36	6.13883	mitochondria	16.6555	5.41908	mitochondria	24.0951	5.03998	mitochondria	21.01	8.99	1.03	mitochondria	17.8	3.58	0.87	mitochondria	18.88	3.43	0.92	mitochondria	Protein of unknown function; null mutant lacks mitochondrial DNA and cannot grow on glycerol; the authentic, non-tagged protein is detected in highly purified mitochondria in high-throughput studies
YDL109C	YDL109C	16.07	3.57733	below threshold	16.6571	3.43817	below threshold	15.4964	3.61933	below threshold	17.22	6.09	1.07	cytosol	18.54	3.77	1.15	cytosol	17.2	5.19	1.07	cytosol	Putative lipase; involved in lipid metabolism; YDL109C is not an essential gene
YBR088C	POL30	16.29	3.49751	below threshold	16.6582	3.66322	below threshold	15.9586	3.33817	below threshold	16.5	5.64	1.01	cytosol	17.98	3.82	1.1	cytosol	13.86	3.29	0.85	cytosol	Proliferating cell nuclear antigen (PCNA), functions as the sliding clamp for DNA polymerase delta; may function as a docking site for other proteins required for mitotic and meiotic chromosomal DNA replication and for DNA repair
YNL262W	POL2	14.99	4.20905	below threshold	16.6658	4.76353	below threshold	13.3396	3.72711	below threshold	14.14	5.32	0.94	cytosol	19.33	3.76	1.28	cytosol	17.08	6.27	1.13	cytosol	Catalytic subunit of DNA polymerase (II) epsilon, a chromosomal DNA replication polymerase that exhibits processivity and proofreading exonuclease activity; also involved in DNA synthesis during DNA repair; interacts extensively with Mrc1p
YDR277C	MTH1	14.83	3.70345	below threshold	16.67	3.24174	below threshold	13.0097	3.51276	below threshold	16.13	6.09	1.08	cytosol	16.35	2.97	1.1	cytosol	14.03	2.76	0.94	cytosol	Negative regulator of the glucose-sensing signal transduction pathway, required for repression of transcription by Rgt1p; interacts with Rgt1p and the Snf3p and Rgt2p glucose sensors; phosphorylated by Yck1p, triggering Mth1p degradation
YGR249W	MGA1	17.3	4.29959	below threshold	16.6721	4.34179	below threshold	17.9424	4.16279	below threshold	16.45	6.64	0.95	cytosol	17.52	3.55	1.01	cytosol	13.5	2.81	0.78	cytosol	Protein similar to heat shock transcription factor; multicopy suppressor of pseudohyphal growth defects of ammonium permease mutants
YGR049W	SCM4	17.24	3.78286	below threshold	16.6728	4.00414	below threshold	17.8204	3.50043	below threshold	14.96	5.74	0.86	cytosol	16.27	2.98	0.94	cytosol	17.72	4.28	1.02	cytosol	Potential regulatory effector of CDC4 function, suppresses a temperature-sensitive allele of CDC4, tripartite protein structure in which a charged region separates two uncharged domains, not essential for mitosis or meiosis
YFR027W	ECO1	16.7	4.57739	nucleus	16.6744	5.21929	nucleus	16.741	3.66168	nucleus	19.31	6.06	1.15	nucleus	19.26	3.76	1.15	nucleus	17.43	3.33	1.04	nucleus	Acetytransferase required for sister chromatid cohesion; modifies Smc3p at DNA replication forks during S-phase; modifies Mcd1p in response to double-strand DNA breaks during G2/M; acetylation of cohesin subunits antagonizes Rad61p
YER093C-A	AIM11	16.74	3.15825	below threshold	16.6749	3.25399	below threshold	16.8153	3.02917	below threshold	15.76	5.93	0.94	cytosol	15.58	2.79	0.93	cytosol	17.06	6.34	1.01	cytosol	Protein of unknown function; null mutant is viable but shows increased loss of mitochondrial genome and synthetic interaction with prohibitin (phb1); contains an intron
YLR376C	PSY3	18.44	3.8039	below threshold	16.6758	2.91444	below threshold	20.212	3.95837	cytosol	19.79	7	1.07	cytosol	16.1	2.59	0.87	cytosol	16.47	3.78	0.89	cytosol	Protein involved in a Rad51p-, Rad54p-dependent pathway for homologous recombination repair; deletion results in a mutator phenotype; deletion increases sensitivity to anticancer drugs oxaliplatin and cisplatin but not mitomycin C
YHR018C	ARG4	16.57	3.6451	below threshold	16.6792	4.08055	below threshold	16.4893	3.45294	below threshold	16.27	5.3	0.98	cytosol	16.96	2.96	1.02	cytosol	15	5.73	0.9	cytosol	Argininosuccinate lyase, catalyzes the final step in the arginine biosynthesis pathway
YOL110W	SHR5	17.34	4.8912	below threshold	16.6795	5.54382	below threshold	18.0129	3.58781	below threshold	19.93	6.11	1.14	cytosol	17.38	3.47	1	cytosol	19.24	4.68	1.1	cytosol	Subunit of a palmitoyltransferase, composed of Shr5p and Erf2p, that adds a palmitoyl lipid moiety to heterolipidated substrates such as Ras1p and Ras2p through a thioester linkage; palmitoylation is required for Ras2p membrane localization
YIL145C	PAN6	15.51	3.43073	below threshold	16.6816	3.56348	below threshold	14.3425	3.16451	below threshold	16.86	7.23	1.08	cytosol	16.4	3.3	1.05	cytosol	17.47	2.65	1.12	cytosol	Pantothenate synthase, also known as pantoate-beta-alanine ligase, required for pantothenic acid biosynthesis, deletion causes pantothenic acid auxotrophy, homologous to E. coli panC
YIL166C	YIL166C	15.79	3.92787	below threshold	16.6819	4.23153	below threshold	14.9154	3.33173	below threshold	14.46	4.62	0.91	cytosol	15.7	4.52	0.99	cytosol	15.82	4.95	1	cytosol	Putative protein with similarity to the allantoate permease (Dal5p) subfamily of the major facilitator superfamily; mRNA expression is elevated by sulfur limitation; YIL166C is a non-essential gene
YMR054W	STV1	15.87	4.99096	below threshold	16.6851	5.33824	below threshold	15.0625	4.71682	below threshold	14.02	4.85	0.88	cytosol	14.75	3.85	0.92	cytosol	14.96	3.25	0.94	cytosol	Subunit a of the vacuolar-ATPase V0 domain, one of two isoforms (Stv1p and Vph1p); Stv1p is located in V-ATPase complexes of the Golgi and endosomes while Vph1p is located in V-ATPase complexes of the vacuole
YBR274W	CHK1	15.66	4.25087	below threshold	16.6864	4.07536	below threshold	14.6498	4.22167	below threshold	19.37	6.21	1.23	cytosol	18.75	3.36	1.19	cytosol	14.86	3.82	0.94	cytosol	Serine/threonine kinase and DNA damage checkpoint effector, mediates cell cycle arrest via phosphorylation of Pds1p; phosphorylated by checkpoint signal transducer Mec1p; homolog of S. pombe and mammalian Chk1 checkpoint kinase
YNL288W	CAF40	15.82	3.81824	below threshold	16.6867	3.34978	below threshold	14.9669	3.95808	below threshold	15.73	4.91	0.99	cytosol	16.97	3.36	1.07	cytosol	23.16	4.96	1.46	cytosol	Evolutionarily conserved subunit of the CCR4-NOT complex involved in controlling mRNA initiation, elongation and degradation; binds Cdc39p
YJL025W	RRN7	16.57	3.30232	below threshold	16.6869	3.70273	below threshold	16.4786	2.5755	below threshold	18.62	6.11	1.12	cytosol	16.17	2.81	0.97	cytosol	15.02	2.41	0.9	cytosol	Component of the core factor (CF) rDNA transcription factor complex; CF is required for transcription of 35S rRNA genes by RNA polymerase I and is composed of Rrn6p, Rrn7p, and Rrn11p
YDR308C	SRB7	14.92	4.21976	below threshold	16.6899	4.51933	below threshold	13.1619	3.46155	below threshold	16.04	7.56	1.07	cytosol	15	2.75	1	cytosol	21.15	5.25	1.41	cytosol	Subunit of the RNA polymerase II mediator complex; associates with core polymerase subunits to form the RNA polymerase II holoenzyme; essential for transcriptional regulation; target of the global repressor Tup1p
YEL038W	UTR4	17.23	3.20031	below threshold	16.6908	2.45804	below threshold	17.7834	3.6087	below threshold	17.48	5.56	1.01	cytosol	14.74	2.42	0.85	cytosol	16.87	4.29	0.97	cytosol	Protein with sequence similarity to 2,3-diketo-5-methylthiopentyl-1-phosphate enolase-phosphatases, involved in methionine salvage; found in both the cytoplasm and nucleus
YBR256C	RIB5	16.97	4.09015	below threshold	16.6935	4.30128	below threshold	17.2513	3.62876	below threshold	17.23	6.87	1.01	cytosol	15.04	2.53	0.88	cytosol	16.54	3.57	0.97	cytosol	Riboflavin synthase; catalyzes the last step of the riboflavin biosynthesis pathway
YIL023C	YKE4	16.22	3.99173	below threshold	16.6955	4.32229	below threshold	15.7505	3.71232	below threshold	16.03	4.53	0.98	cytosol	16.69	4.1	1.02	cytosol	21.61	4.7	1.33	cytosol	Zinc transporter; localizes to the ER; null mutant is sensitive to calcofluor white, leads to zinc accumulation in cytosol; ortholog of the mouse KE4 and member of the ZIP (ZRT, IRT-like Protein) family
YDL068W	YDL068W	17.23	4.27605	below threshold	16.6974	4.14007	below threshold	17.7815	4.28816	below threshold	16.83	6.13	0.97	cytosol	17.13	4.96	0.99	cytosol	16.03	3.73	0.93	cytosol	Dubious ORF unlikely to encode a protein, based on available experimental and comparative sequence data
YGR225W	AMA1	16.18	3.06115	below threshold	16.6992	3.2491	below threshold	15.6798	2.73302	below threshold	17.58	6.1	1.08	cytosol	17.47	3.48	1.07	cytosol	16.47	2.49	1.01	cytosol	Activator of meiotic anaphase promoting complex (APC/C); Cdc20p family member; required for initiation of spore wall assembly; required for Clb1p degradation during meiosis
YDR501W	PLM2	16.57	3.77507	below threshold	16.6995	3.87187	below threshold	16.4646	3.66179	below threshold	17.62	8.44	1.06	cytosol	16	3.21	0.96	cytosol	16.19	4.44	0.97	cytosol	Forkhead Associated domain containing protein and putative transcription factor found associated with chromatin; target of SBF transcription factor; induced in response to DNA damaging agents and deletion of telomerase; similar to TOS4
YOR056C	NOB1	17.09	5.04655	below threshold	16.6997	4.53954	below threshold	17.4926	5.25918	below threshold	16.65	5.76	0.97	cytosol	15.18	2.87	0.88	cytosol	13.98	2.55	0.81	cytosol	Essential nuclear protein involved in proteasome maturation and synthesis of 40S ribosomal subunits; required for cleavage of the 20S pre-rRNA to generate the mature 18S rRNA
YDL156W	CMR1	16.48	3.45657	below threshold	16.7015	3.4752	below threshold	16.2704	3.44682	below threshold	18.43	5.25	1.11	cytosol	16.54	5.18	1	cytosol	17.48	5.83	1.06	cytosol	Putative protein of unknown function; protein sequence contains three WD domains (WD-40 repeat); green fluorescent protein (GFP)-fusion protein localizes to the cytoplasm and nucleus
YIL152W	YIL152W	16.78	4.23079	below threshold	16.7033	3.58396	below threshold	16.8713	4.63617	below threshold	18.65	6.47	1.11	cytosol	13.94	2.54	0.83	cytosol	14.18	2.82	0.84	cytosol	Putative protein of unknown function
YDR523C	SPS1	16.35	3.75797	below threshold	16.7056	3.59237	below threshold	16.0115	3.85265	below threshold	18.69	6.1	1.14	cytosol	16.9	3.36	1.03	cytosol	16.61	6.9	1.01	cytosol	Putative protein serine/threonine kinase expressed at the end of meiosis and localized to the prospore membrane, required for correct localization of enzymes involved in spore wall synthesis
YOR225W	YOR225W	16.92	4.52682	below threshold	16.7115	5.12714	below threshold	17.1452	3.53364	below threshold	17.42	5.49	1.02	cytosol	17.35	4.19	1.02	cytosol	15.77	4.15	0.93	cytosol	Dubious open reading frame unlikely to encode a functional protein, based on available experimental and comparative sequence data
YLR314C	CDC3	15.22	3.6596	below threshold	16.7199	2.92705	below threshold	13.742	3.75007	below threshold	17.22	5.89	1.13	cytosol	16.55	2.57	1.08	cytosol	15.64	2.32	1.02	cytosol	Component of the septin ring of the mother-bud neck that is required for cytokinesis; septins recruit proteins to the neck and can act as a barrier to diffusion at the membrane, and they comprise the 10nm filaments seen with EM
YNR023W	SNF12	16.65	4.39813	below threshold	16.72	4.04251	below threshold	16.6078	4.46696	below threshold	16.39	6.18	0.98	cytosol	17.59	3.27	1.05	cytosol	14.3	3.28	0.85	cytosol	73 kDa subunit of the SWI/SNF chromatin remodeling complex involved in transcriptional regulation; homolog of Rsc6p subunit of the RSC chromatin remodeling complex; deletion mutants are temperature-sensitive
YMR155W	YMR155W	16.88	4.22911	below threshold	16.7211	4.34638	below threshold	17.0429	4.16004	below threshold	13.94	4.18	0.82	cytosol	17.39	5.13	1.03	cytosol	17.01	3.09	1	cytosol	Putative protein of unknown function; identified as interacting with Hsp82p in a high-throughput two-hybrid screen
YOR261C	RPN8	15.31	3.64609	below threshold	16.7213	2.59216	below threshold	13.913	3.68957	below threshold	16.5	5.64	1.07	cytosol	15.18	2.76	0.99	cytosol	17.14	3.08	1.11	cytosol	Essential, non-ATPase regulatory subunit of the 26S proteasome; has similarity to the human p40 proteasomal subunit and to another S. cerevisiae regulatory subunit, Rpn11p
YKL132C	RMA1	14.72	4.18542	below threshold	16.7246	3.76315	below threshold	12.7385	3.96666	below threshold	16.39	5.61	1.11	cytosol	16.29	3.51	1.1	cytosol	14.52	4.83	0.98	cytosol	Putative dihydrofolate synthetase; has similarity to Fol3p and to E. coli folylpolyglutamate synthetase/dihydrofolate synthetase; the authentic, non-tagged protein is detected in highly purified mitochondria in high-throughput studies
YAR002W	NUP60	16.23	4.24597	below threshold	16.7296	4.30654	below threshold	15.749	4.07772	below threshold	14.4	4.16	0.88	cytosol	17.34	3.86	1.06	cytosol	17.51	3.3	1.07	cytosol	Subunit of the nuclear pore complex (NPC), functions to anchor Nup2p to the NPC in a process controlled by the nucleoplasmic concentration of Gsp1p-GTP; potential Cdc28p substrate; involved in telomere maintenance
YLR446W	YLR446W	16.58	3.87258	below threshold	16.731	4.03208	below threshold	16.443	3.6534	below threshold	16.67	12.66	1	cytosol	16.92	2.86	1.02	cytosol	13.38	2.46	0.8	cytosol	Putative protein of unknown function with similarity to hexokinases; transcript is upregulated during sporulation and the unfolded protein response; YLR446W is not an essential gene
YMR193C-A	YMR193C-A	16.06	3.71582	below threshold	16.7323	4.32516	below threshold	15.4096	3.21686	below threshold	15.49	4.88	0.96	cytosol	15.32	3.95	0.95	cytosol	16.87	4.5	1.04	cytosol	Dubious open reading frame unlikely to encode a functional protein, based on available experimental and comparative sequence data
YCR039C	MATALPHA2	16.59	3.53391	below threshold	16.7346	3.96483	below threshold	16.4647	2.97197	below threshold	18.44	7.14	1.11	cytosol	16.04	3.24	0.96	cytosol	17.73	5.86	1.06	cytosol	Homeobox-domain protein that, with Mcm1p, represses a-specific genes in haploids; acts with A1p to repress transcription of haploid-specific genes in diploids; one of two genes encoded by the MATalpha mating type cassette
YMR084W	YMR084W	15.73	3.85622	below threshold	16.7347	3.74792	below threshold	14.7326	4.08682	below threshold	16.32	6.25	1.03	cytosol	17.04	3.6	1.08	cytosol	14.08	3.33	0.89	cytosol	Putative protein of unknown function; YMR084W and adjacent ORF YMR085W are merged in related strains
YIR016W	YIR016W	15.87	3.6209	below threshold	16.735	3.94416	below threshold	15.0151	3.27593	below threshold	17.08	5.88	1.07	cytosol	16.39	3.5	1.03	cytosol	17.87	2.93	1.12	cytosol	Putative protein of unknown function; expression directly regulated by the metabolic and meiotic transcriptional regulator Ume6p; overexpression causes a cell cycle delay or arrest; YIR016W is a non-essential gene
YER046W	SPO73	16.57	3.74338	below threshold	16.7388	4.32185	below threshold	16.4217	3.36849	below threshold	16.4	4.85	0.98	cytosol	16.47	3.02	0.99	cytosol	21.24	6.52	1.28	cytosol	Meiosis-specific protein of unknown function, required for spore wall formation during sporulation; dispensible for both nuclear divisions during meiosis
YER127W	LCP5	17.08	3.72104	below threshold	16.7414	3.19655	below threshold	17.4329	3.81858	below threshold	14.41	4.92	0.84	cytosol	19.47	4.33	1.13	cytosol	23.91	8.71	1.39	cytosol	Essential protein involved in maturation of 18S rRNA; depletion leads to inhibited pre-rRNA processing and reduced polysome levels; localizes primarily to the nucleolus
YOL016C	CMK2	16.07	4.02497	below threshold	16.7415	4.13023	below threshold	15.4274	3.65638	below threshold	16.38	5.89	1.01	cytosol	18.04	3.51	1.12	cytosol	14.66	3.51	0.91	cytosol	Calmodulin-dependent protein kinase; may play a role in stress response, many CA++/calmodulan dependent phosphorylation substrates demonstrated in vitro, amino acid sequence similar to Cmk1p and mammalian Cam Kinase II
YER044C-A	MEI4	15.99	3.98475	below threshold	16.7419	4.24274	below threshold	15.2534	3.57381	below threshold	17.9	7.78	1.11	cytosol	18.04	3.33	1.12	cytosol	14.58	3.63	0.91	cytosol	Meiosis-specific protein involved in double-strand break formation during meiotic recombination; required for chromosome synapsis and production of viable spores
YBL109W	YBL109W	17.11	3.74635	below threshold	16.75	3.71882	below threshold	17.4795	3.75211	below threshold	14.6	6.53	0.85	cytosol	17.77	3.04	1.03	cytosol	16.5	3.31	0.96	cytosol	Dubious open reading frame unlikely to encode a protein, based on experimental and comparative sequence data
YMR172C-A	YMR172C-A	16.71	3.93247	below threshold	16.75	4.6449	below threshold	16.6833	3.33018	below threshold	14.98	4.81	0.89	cytosol	14.98	2.78	0.89	cytosol	16.86	4.73	1	cytosol	Dubious open reading frame unlikely to encode a protein, based on available experimental and comparative sequence data
YER056C	FCY2	17.22	3.79446	below threshold	16.7504	4.0256	below threshold	17.7061	3.37538	below threshold	13.29	4.13	0.77	cytosol	14.47	3.5	0.84	cytosol	18.01	2.86	1.04	cytosol	Purine-cytosine permease, mediates purine (adenine, guanine, and hypoxanthine) and cytosine accumulation
YGL165C	YGL165C	17.35	4.0105	below threshold	16.7516	4.3265	below threshold	17.9618	3.65837	below threshold	14.49	5.12	0.83	cytosol	18.2	3.82	1.04	cytosol	16.41	4.12	0.94	cytosol	Dubious open reading frame unlikely to encode a protein, based on available experimental and comparative sequence data; partially overlaps the verified ORF CUP2/YGL166W
YJL053W	PEP8	14.98	4.45909	below threshold	16.7521	4.11072	below threshold	13.218	4.0608	below threshold	14.67	5.06	0.97	cytosol	15.06	3.24	1	cytosol	16.99	4.26	1.13	cytosol	Vacuolar protein sorting protein that forms part of the multimeric membrane-associated retromer complex along with Vps35p, Vps29p, Vps17p, and Vps5p; essential for endosome-to-Golgi retrograde protein transport
YPL181W	CTI6	15.97	3.82402	below threshold	16.7572	3.60986	below threshold	15.1953	3.84805	below threshold	18.65	7.31	1.16	cytosol	16.46	3.38	1.03	cytosol	15.82	7.89	0.99	cytosol	Protein that relieves transcriptional repression by binding to the Cyc8p-Tup1p corepressor and recruiting the SAGA complex to the repressed promoter; contains a PHD finger domain
YKR084C	HBS1	15.62	4.09856	below threshold	16.7596	3.84988	below threshold	14.5062	4.05956	below threshold	16.32	6.83	1.04	cytosol	17.3	3.56	1.1	cytosol	14.43	2.52	0.92	cytosol	GTP binding protein with sequence similarity to the elongation factor class of G proteins, EF-1alpha and Sup35p; associates with Dom34p, and shares a similar genetic relationship with genes that encode ribosomal protein components
YFR012W	YFR012W	17.35	3.47889	below threshold	16.7681	3.75524	below threshold	17.9404	3.15219	below threshold	16.03	5.49	0.92	cytosol	18.46	3.77	1.06	cytosol	17.75	4.81	1.02	cytosol	Putative protein of unknown function
YHR047C	AAP1	14.82	3.583	below threshold	16.7683	3.19327	below threshold	12.8826	3.09968	below threshold	17.99	5.61	1.21	cytosol	14.2	3.11	0.95	cytosol	15.89	7.66	1.07	cytosol	Arginine/alanine aminopeptidase, overproduction stimulates glycogen accumulation
YJL094C	KHA1	17.24	5.16535	below threshold	16.7685	4.85397	below threshold	17.7309	5.75819	below threshold	14.43	4.4	0.83	cytosol	14.04	3.49	0.81	cytosol	15.68	3.94	0.9	cytosol	Putative K+/H+ antiporter with a probable role in intracellular cation homeostasis, localized to Golgi vesicles and detected in highly purified mitochondria in high-throughput studies
YOR032C	HMS1	15.41	3.8666	below threshold	16.7705	3.96444	below threshold	14.0595	2.85707	below threshold	18.17	5.87	1.17	cytosol	16.38	3.07	1.06	cytosol	18.62	4.2	1.2	cytosol	Basic helix-loop-helix (bHLH) protein with similarity to myc-family transcription factors; overexpression confers hyperfilamentous growth and suppresses the pseudohyphal filamentation defect of a diploid mep1 mep2 homozygous null mutant
YGL210W	YPT32	16.02	4.41496	below threshold	16.7713	4.74123	below threshold	15.2794	3.90067	below threshold	15.55	5.34	0.97	cytosol	14.54	3.03	0.9	cytosol	15.03	4.96	0.93	cytosol	GTPase of the Ypt/Rab family, very similar to Ypt31p; involved in the exocytic pathway; mediates intra-Golgi traffic or the budding of post-Golgi vesicles from the trans-Golgi
YJR012C	YJR012C	18.43	3.91143	below threshold	16.7729	3.20141	below threshold	20.0988	4.00904	cytosol	19.92	8.04	1.08	cytosol	15.81	2.65	0.85	cytosol	18.17	4.06	0.98	cytosol	Essential protein of unknown function; proposed involvement in transport based on mass spectrometry analysis of copurifying proteins; partially overlaps neighboring ORF, GPI14/YJR013W
YAL033W	POP5	17.42	3.75307	below threshold	16.7733	4.11847	below threshold	18.0796	2.8182	below threshold	15.18	7.42	0.87	cytosol	15.74	2.64	0.9	cytosol	15.57	3.3	0.89	cytosol	Subunit of both RNase MRP, which cleaves pre-rRNA, and nuclear RNase P, which cleaves tRNA precursors to generate mature 5' ends
YCR038C	BUD5	16.39	4.09705	below threshold	16.7735	3.85496	below threshold	16.0142	4.28982	below threshold	15	7.09	0.91	cytosol	19.93	3.9	1.21	cytosol	17.35	2.76	1.05	cytosol	GTP/GDP exchange factor for Rsr1p (Bud1p) required for both axial and bipolar budding patterns; mutants exhibit random budding in all cell types
YAL040C	CLN3	16.28	3.50647	below threshold	16.7752	3.28398	below threshold	15.8041	3.64627	below threshold	16.61	5.88	1.01	cytosol	19.95	3.55	1.22	cytosol	14.73	2.74	0.9	cytosol	G1 cyclin involved in cell cycle progression; activates Cdc28p kinase to promote the G1 to S phase transition; plays a role in regulating transcription of the other G1 cyclins, CLN1 and CLN2; regulated by phosphorylation and proteolysis
YBR202W	MCM7	14.74	3.62557	below threshold	16.7753	2.88736	below threshold	12.7121	3.29117	below threshold	17.49	5.72	1.18	cytosol	14.24	3.12	0.96	cytosol	18.29	2.97	1.24	cytosol	Component of the hexameric MCM complex, which is important for priming origins of DNA replication in G1 and becomes an active ATP-dependent helicase that promotes DNA melting and elongation when activated by Cdc7p-Dbf4p in S-phase
YPR157W	TDA6	15.59	3.77131	below threshold	16.7778	3.21638	below threshold	14.4289	4.01079	below threshold	18.34	6.61	1.17	cytosol	16.97	2.83	1.08	cytosol	16.05	3.53	1.02	cytosol	Putative protein of unknown function; induced by treatment with 8-methoxypsoralen and UVA irradiation
YMR031W-A	YMR031W-A	16.24	3.49328	below threshold	16.7786	3.19852	below threshold	15.71	3.6935	below threshold	15.82	4.89	0.97	cytosol	16.41	2.87	1.01	cytosol	15.97	3.22	0.98	cytosol	Dubious open reading frame unlikely to encode a protein, based on available experimental and comparative sequence data; null mutant displays shortened telomeres; partially overlaps the uncharacterized ORF YMR031C
YMR070W	MOT3	16.25	3.53965	below threshold	16.7804	3.52912	below threshold	15.7278	3.48705	below threshold	15.52	5.97	0.95	cytosol	16.58	4.05	1.02	cytosol	14.67	2.81	0.9	cytosol	Nuclear transcription factor with two Cys2-His2 zinc fingers; involved in repression of a subset of hypoxic genes by Rox1p, repression of several DAN/TIR genes during aerobic growth, and repression of ergosterol biosynthetic genes
YMR216C	SKY1	16.01	4.05003	below threshold	16.7814	3.45438	below threshold	15.2442	4.11361	below threshold	17.68	6.18	1.1	cytosol	18.72	4.37	1.16	cytosol	14.46	3.34	0.9	cytosol	SR protein kinase (SRPK) involved in regulating proteins involved in mRNA metabolism and cation homeostasis; similar to human SRPK1
YBR216C	YBP1	16.35	3.50785	below threshold	16.7831	3.5546	below threshold	15.9201	3.46016	below threshold	17.58	5.3	1.07	cytosol	19.49	4.38	1.19	cytosol	15.44	3.35	0.94	cytosol	Protein required for oxidation of specific cysteine residues of the transcription factor Yap1p, resulting in the nuclear localization of Yap1p in response to stress
YLL055W	YCT1	18	6.19992	below threshold	16.7833	6.84474	below threshold	19.2263	5.33104	cytosol	15.22	6.24	0.84	cytosol	20.16	10.46	1.11	cytosol	116.21	32.54	6.45	ER	High-affinity cysteine-specific transporter with similarity to the Dal5p family of transporters; green fluorescent protein (GFP)-fusion protein localizes to the endoplasmic reticulum; YCT1 is not an essential gene
YIR037W	HYR1	17.73	3.57273	below threshold	16.7838	3.74301	below threshold	18.6889	3.3259	below threshold	15.47	5.04	0.87	cytosol	16.4	3.46	0.92	cytosol	16.16	4.51	0.91	cytosol	Thiol peroxidase that functions as a hydroperoxide receptor to sense intracellular hydroperoxide levels and transduce a redox signal to the Yap1p transcription factor
YLR279W	YLR279W	16.31	3.51359	below threshold	16.7839	3.63218	below threshold	15.8448	3.23778	below threshold	16.65	5.87	1.02	cytosol	14.83	2.56	0.9	cytosol	19.49	3.63	1.19	cytosol	Dubious open reading frame unlikely to encode a functional protein, based on available experimental and comparative sequence data
YCL076W	YCL076W	17.07	4.19594	below threshold	16.7843	4.20887	below threshold	17.3884	4.18401	below threshold	18.86	6.18	1.1	cytosol	15.4	2.65	0.9	cytosol	16.28	3.45	0.95	cytosol	Dubious open reading frame unlikely to encode a protein, based on available experimental and comparative sequence data
YBR020W	GAL1	15.36	3.29404	below threshold	16.785	3.22878	below threshold	13.9496	3.03302	below threshold	15.96	5.92	1.03	cytosol	15.24	3.2	0.99	cytosol	15.67	3.22	1.02	cytosol	Galactokinase, phosphorylates alpha-D-galactose to alpha-D-galactose-1-phosphate in the first step of galactose catabolism; expression regulated by Gal4p
YNL178W	RPS3	16.99	4.41119	below threshold	16.7863	3.96279	below threshold	17.2129	6.39029	below threshold	18.68	6.41	1.09	cytosol	14.08	2.5	0.82	cytosol	19.43	10.01	1.14	cytosol	Protein component of the small (40S) ribosomal subunit, has apurinic/apyrimidinic (AP) endonuclease activity; essential for viability; has similarity to E. coli S3 and rat S3 ribosomal proteins
YHR048W	YHK8	16.86	3.83879	below threshold	16.7863	4.12598	below threshold	16.9467	3.53786	below threshold	13.29	4.53	0.78	cytosol	16.13	2.98	0.95	cytosol	NA	NA	NA	cytosol	Presumed antiporter of the DHA1 family of multidrug resistance transporters; contains 12 predicted transmembrane spans; expression of gene is up-regulated in cells exhibiting reduced susceptibility to azoles
YGL149W	YGL149W	15.52	4.1336	below threshold	16.7905	4.41551	below threshold	14.2536	3.28193	below threshold	15.32	5.75	0.98	cytosol	16.8	3.67	1.08	cytosol	15.04	3.59	0.96	cytosol	Dubious open reading frame unlikely to encode a protein, based on available experimental and comparative sequence data; partially overlaps the verified ORF INO80/YGL150C.
YER153C	PET122	15.63	3.84029	below threshold	16.7937	4.17498	below threshold	14.4703	3.43029	below threshold	16.96	5.66	1.08	cytosol	16.22	3.72	1.03	cytosol	18.74	3.25	1.19	cytosol	Mitochondrial translational activator specific for the COX3 mRNA, acts together with Pet54p and Pet494p; located in the mitochondrial inner membrane
YPR204W	YPR204W	16.24	3.75084	below threshold	16.7943	3.81587	below threshold	15.7093	3.56374	below threshold	16.84	6.58	1.03	cytosol	19.23	4.16	1.18	cytosol	17.13	4.54	1.05	cytosol	Helicase-like protein encoded within the telomeric Y' element
YMR265C	YMR265C	15.77	4.10055	below threshold	16.7948	3.5715	below threshold	14.7583	4.2907	below threshold	16.36	6.1	1.03	cytosol	17.44	3	1.1	cytosol	13.33	2.33	0.84	cytosol	Putative protein of unknown function
YLR061W	RPL22A	15.81	4.35886	below threshold	16.7952	3.98208	below threshold	14.8457	4.41971	below threshold	16.52	5.96	1.04	cytosol	14.41	3.29	0.91	cytosol	20.01	3.33	1.26	cytosol	Protein component of the large (60S) ribosomal subunit, has similarity to Rpl22Bp and to rat L22 ribosomal protein
YDR411C	DFM1	15.96	3.89071	below threshold	16.7972	3.6252	below threshold	15.1364	3.79096	below threshold	18.49	5.2	1.15	cytosol	16.87	3.35	1.05	cytosol	50.15	20.65	3.14	cytosol	ER localized derlin-like family member involved in ER stress and homeostasis; not involved in ERAD or substrate retrotranslocation; interacts with CDC48; contains four transmembrane domains and two SHP boxes
YJR035W	RAD26	16.85	3.9096	below threshold	16.7972	4.18642	below threshold	16.9285	3.47757	below threshold	13.82	4.51	0.81	cytosol	18.35	4.84	1.08	cytosol	16.56	3.66	0.98	nucleus	Protein involved in transcription-coupled nucleotide excision repair of UV-induced DNA lesions; recruitment to DNA lesions is dependent on an elongating RNA polymerase II; homolog of human CSB protein
YNL109W	YNL109W	16.7	3.28127	below threshold	16.7992	3.14869	below threshold	16.6122	3.45864	below threshold	15.92	5.96	0.95	cytosol	16.01	3.46	0.95	cytosol	18.45	8.88	1.1	cytosol	Dubious open reading frame unlikely to encode a protein, based on available experimental and comparative sequence data; partially overlaps the uncharacterized ORF YNL108C
YIL087C	AIM19	17.77	3.58738	mitochondria	16.8006	3.68485	mitochondria	18.7535	2.92947	mitochondria	16.71	6.55	0.94	mitochondria	17.63	3.37	0.99	mitochondria	17.45	4.27	0.98	mitochondria	Putative protein of unknown function; the authentic, non-tagged protein is detected in purified mitochondria in high-throughput studies; null mutant displays reduced respiratory growth
YLR410W	VIP1	15.95	3.84592	below threshold	16.8013	3.84347	below threshold	15.1026	3.64262	below threshold	16.88	5.56	1.05	cytosol	19.03	4.45	1.19	cytosol	15.12	4.41	0.94	cytosol	Inositol hexakisphosphate (IP6) and inositol heptakisphosphate (IP7) kinase; generation of IP7 by Vip1p is important for phosphate signaling; likely involved in cortical actin cytoskeleton function, by analogy with S. pombe ortholog asp1
YOR313C	SPS4	15.2	3.27908	below threshold	16.8016	2.9484	below threshold	13.6032	2.92482	below threshold	17.97	5.12	1.18	cytosol	14.28	2.46	0.93	cytosol	15.93	3.57	1.04	cytosol	Protein whose expression is induced during sporulation; not required for sporulation; heterologous expression in E. coli induces the SOS response that senses DNA damage
YIL150C	MCM10	16.21	3.60383	below threshold	16.803	3.47252	below threshold	15.6225	3.73798	below threshold	17.65	6.67	1.08	cytosol	16.61	4.54	1.02	cytosol	14.58	2.87	0.89	cytosol	Essential chromatin-associated protein involved in the initiation of DNA replication; required for the association of the MCM2-7 complex with replication origins
YOL141W	PPM2	16.46	4.276	below threshold	16.803	4.885	below threshold	16.1304	3.41208	below threshold	18.46	7.16	1.12	cytosol	18.38	3.74	1.11	cytosol	14.99	3.09	0.91	cytosol	AdoMet-dependent tRNA methyltransferase also involved in methoxycarbonylation; required for the synthesis of wybutosine (yW), a modified guanosine found at the 3'-position adjacent to the anticodon of phe-tRNA; similarity to Ppm1p
YDL039C	PRM7	15.51	4.41711	below threshold	16.8109	4.35644	below threshold	14.2229	3.88986	below threshold	15.17	5.57	0.97	cytosol	14.91	3.19	0.96	cytosol	15.62	5.28	1	cytosol	Pheromone-regulated protein, predicted to have one transmembrane segment; promoter contains Gcn4p binding elements
YNL018C	YNL018C	15.43	3.98887	below threshold	16.8121	4.02878	below threshold	14.0628	3.62573	below threshold	17.35	6.1	1.12	cytosol	17.07	3.59	1.1	cytosol	15.09	3.09	0.97	cytosol	Putative protein of unknown function
YDR286C	YDR286C	17.25	3.87475	below threshold	16.8132	3.63732	below threshold	17.7172	3.99549	below threshold	16.24	5.5	0.94	cytosol	16.8	3.09	0.97	cytosol	15.9	2.99	0.92	cytosol	Putative protein of unknown function; predicted to have thiol-disulfide oxidoreductase active site
YFR032C	RRT5	15.8	4.00745	below threshold	16.8135	3.8218	below threshold	14.8059	3.89816	below threshold	16.5	5.41	1.04	cytosol	16.51	2.72	1.04	cytosol	16.07	1.97	1.01	cytosol	Putative protein of unknown function; non-essential gene identified in a screen for mutants with increased levels of rDNA transcription; expressed at high levels during sporulation
YGR117C	YGR117C	16.82	4.47549	below threshold	16.8144	4.61809	below threshold	16.8555	4.23291	below threshold	20.54	6.72	1.22	cytosol	17.23	3.31	1.02	cytosol	17.46	3.57	1.03	cytosol	Putative protein of unknown function; green fluorescent protein (GFP)-fusion protein localizes to the cytoplasm
YOL099C	YOL099C	17.52	3.80213	below threshold	16.8157	3.48191	below threshold	18.2342	4.01014	below threshold	15.16	5.86	0.86	cytosol	15.63	3.1	0.89	cytosol	17.22	5.59	0.98	cytosol	Dubious open reading frame unlikely to encode a protein, based on available experimental and comparative sequence data; partially overlaps verified gene PKH2/YOL100W; may interact with ribosomes
YNL092W	YNL092W	16.5	3.79589	below threshold	16.8161	3.70833	below threshold	16.1968	3.86816	below threshold	17.6	5.49	1.06	cytosol	19.49	3.82	1.18	cytosol	31.64	9.06	1.91	cytosol	Putative S-adenosylmethionine-dependent methyltransferase of the seven beta-strand family; YNL092W is not an essential gene
YIL125W	KGD1	16.55	3.42216	below threshold	16.8182	3.33903	below threshold	16.3158	3.51718	below threshold	15.21	4.37	0.91	cytosol	17.89	3.77	1.08	cytosol	16.91	3.55	1.02	cytosol	Component of the mitochondrial alpha-ketoglutarate dehydrogenase complex, which catalyzes a key step in the tricarboxylic acid (TCA) cycle, the oxidative decarboxylation of alpha-ketoglutarate to form succinyl-CoA
[truncated: 4,175 more rows]
