# Supplementary material for: A systematic bi-genomic split-GFP assay illuminates the mitochondrial matrix proteome and protein targeting routes
Source: eLife journal article supplement (doi:10.7554/elife.98889), 2024-07-26
Supplement: fig2-data1 [file Ho_et_al.xlsx]

## Sheet: Table S4
Systematic Name	Standard Name	Qualifier	Mean molecules per cell	Median molecules per cell	Coefficient of Variation	LU	PENG	KUL	LAW	LAHT	DGD	LEE2	THAK	NAG	PIC	WEB	TKA	BRE	DEN	MAZ	CHO	YOF	NEW	LEE	DAV	GHA
YMR191W	SPG5	Verified	3.35978	3.35978				3.35978
YJL093C	TOK1	Verified	3.80423	3.80423				3.80423
YER184C	TOG1	Verified	4.72573	4.72573				4.72573
YGL063W	PUS2	Verified	5.49725	5.49725				5.49725
YPL159C	PET20	Verified	6.92293	6.92293				6.92293
YDR106W	ARP10	Verified	8.00989	8.00989				8.00989
YIR025W	MND2	Verified	8.40522	8.40522				8.40522
YDR082W	STN1	Verified	13.8554	13.8554				13.8554
YLR443W	ECM7	Verified	13.8899	13.8899				13.8899
YNL038W	GPI15	Verified	15.2411	15.2411				15.2411
YMR187C	YMR187C	Uncharacterized	15.3466	15.3466				15.3466
YJR106W	ECM27	Verified	16.463	16.463				16.463
YNR063W	YNR063W	Uncharacterized	17.7551	17.7551				17.7551
YBR297W	MAL33	Verified	19.3583	19.3583				19.3583
YDR126W	SWF1	Verified	35.6523	35.6523				35.6523
YJL213W	YJL213W	Verified	58.4109	58.4109						58.4109
YJR126C	VPS70	Verified	59.8835	59.8835	123.079			7.76698																		112
YHR176W	FMO1	Verified	531.454	80.6438	147.726		1438	75.7183						80.6438
YOL043C	NTG2	Verified	89.8004	89.8004	55.4337			54.6008																		125
YLR210W	CLB4	Verified	98.9	98.9																						98.9
YHR015W	MIP6	Verified	98.9	98.9																						98.9
YDR314C	RAD34	Verified	309.969	114.308	119.447		737							114.308												78.6
YKR041W	YKR041W	Verified	116.766	116.766	121.398			16.5327																		217
YMR190C	SGS1	Verified	120.187	120.187	135.124			5.35181								235.023
YOL152W	FRE7	Verified	120.348	120.348				120.348
YBR004C	GPI18	Verified	647.504	122.723	151.823			38.1949			122.723											1781.59
YCR073C	SSK22	Verified	122.95	122.95	75.973		189																			56.9
YEL070W	DSF1	Verified	125	125																						125
YIR039C	YPS6	Verified	125.49	125.49				125.49
Q0065	AI4	Verified	127.842	127.842	76.5046		197	58.6832
YPL202C	AFT2	Verified	492.294	139.343	145.667			20.0683			139.343							1317.47
YOR033C	EXO1	Verified	275.97	140	126.296		140	15.9092																		672
YHR173C	YHR173C	Uncharacterized	149	149																						149
YLR087C	CSF1	Verified	253.396	153.203	86.6356	546	86	153.203			426.34					55.4354
YGR110W	CLD1	Verified	477.851	160.201	144.691		1271	2.35023			160.201
YDR104C	SPO71	Verified	162	162			162
YJR161C	COS5	Verified	351.428	162.897	114.899			76.3866						162.897												815
YIL172C	IMA3	Verified	166	166																						166
YBR203W	COS111	Verified	173.827	173.827												173.827
YCR096C	HMRA2	Verified	175.777	175.777				175.777
YOL158C	ENB1	Verified	677.212	176.421	153.73			118.951	2237.05					125.434		227.407
YFL054C	AQY3	Uncharacterized	181.864	181.864	120.636		337	26.7289
Q0115	BI3	Verified	183	183			183
YPL268W	PLC1	Verified	188.481	188.481	138.095			4.43333			372.528
YMR100W	MUB1	Verified	235.17	192.626	98.5282			8.75327						260.251		546.676										125
YDL109C	YDL109C	Uncharacterized	195	195																						195
YFL060C	SNO3	Verified	478.902	195	135.669			19.4468										1222.26								195
YGL113W	SLD3	Verified	453.6	195.5	132.977			73.3101								266.001		1350.09								125
YOR137C	SIA1	Verified	521.541	206.029	138.115			12.8044			206.029							1345.79
YJL083W	TAX4	Verified	206.974	206.974	129.158			17.9475																		396
YNL172W	APC1	Verified	474.334	209	121.456	209	157	27.9653	255.517		1640.08			294.943		204.428		1302.08								178
YPL230W	USV1	Verified	464.111	210.034	130.774			25.5042			210.034							1156.8
YFR027W	ECO1	Verified	210.036	210.036	96.9341		354	66.0714
YLR288C	MEC3	Verified	212.88	212.88	133.609			11.7603																		414
YLL054C	YLL054C	Uncharacterized	210.532	216.223	55.6033			70.6817						166.302		266.144										339
YHR184W	SSP1	Verified	216.356	216.356	136.381	425		7.71119
YDR332W	IRC3	Verified	182.087	218	62.1602		264	25.6708			266.677															172
YPL164C	MLH3	Verified	477.556	219.606	130.061			26.9778								219.606		1186.08
YKR098C	UBP11	Verified	220.329	220.329	133.938		429	11.659
YFL062W	COS4	Verified	223.735	223.735	93.1379			76.3866						371.084
YBR136W	MEC1	Verified	338.054	224	107.549	497	224	19.6872			894.148					55.4354
YBL005W	PDR3	Verified	582.993	225	140.073		225	34.811								473.367								2015.79		166
YOR208W	PTP2	Verified	442.984	230.985	122.538		508	40.1543			148.14					312.971		1499.64								149
YCR032W	BPH1	Verified	944.645	233.713	165.041	3272	383	39.1542								84.4253
YOR129C	AFI1	Verified	786.505	235.005	144.608		168	5.81993								235.005								2755.7		768
YBL014C	RRN6	Verified	542.207	237	136.386			4.16539										1385.46								237
YPL158C	AIM44	Verified	680.691	238	114.993											219.606					1584.47					238
YMR111C	YMR111C	Verified	319.144	238	103.05		681	38.4327																		238
YDR522C	SPS2	Verified	238	238																						238
YFL053W	DAK2	Verified	246.479	246.479						246.479
YDL194W	SNF3	Verified	249	249			249
YML099C	ARG81	Verified	521.153	250.893	108.88		258	20.8687	243.787		859.504					219.606		1525.15
YNR059W	MNT4	Verified	252.147	252.147				252.147
YCL058W-A	ADF1	Verified	255.5	255.5	3.39975			249.358						261.642
YDR179W-A	NVJ3	Verified	423.16	259	117.463			8.49815						107.57		489.716		1251.02								259
YLR049C	YLR049C	Uncharacterized	259.108	259.108	43.6052						179.216															339
YKL072W	STB6	Verified	634.646	261	110.658		311	52.9909			164.151							1573.77			1494.96					211
YKR009C	FOX2	Verified	1192.06	266.001	179.078	208	466	20.1365					5000.15			266.001
YOR172W	YRM1	Verified	545.613	266.763	122.278		123									408.525					1525.93					125
YHR079C	IRE1	Verified	715.551	267	97.3998		267	60.0853	87.4095				1305.17			1350.23					1679.97					259
YPL174C	NIP100	Verified	441.934	267.626	117.549			30.4418								297.252		1202.04								238
YLR067C	PET309	Verified	628.501	270.875	103.996		198	21.8925			270.875							1491.74								1160
Q0055	AI2	Verified	286.564	271	100.932		271	5.42542			583.267
YLR368W	MDM30	Verified	222.153	271	51.619		271				91.1442			304.314
YER038C	KRE29	Verified	483.506	272.561	122.312			34.5077			263.527					281.595		1354.39
YMR176W	ECM5	Verified	486.83	275.5	121.616		292	37.6912			1358.63															259
YPR095C	SYT1	Verified	455.332	279	107.892	1315	242	80.1742								360.486										279
YJL222W	VTH2	Verified	1149.3	279	111.69	253		107.515					2526.25	2580.71												279
YKR101W	SIR1	Verified	503.795	281	114.123		281	73.5893										1156.8
YPL034W	YPL034W	Uncharacterized	760.898	285.534	116.467			213.809			285.534					1783.35
YPL242C	IQG1	Verified	414.854	288.569	83.4428	929	215	22.8267			745.159					298.137										279
YNL008C	ASI3	Verified	575.119	289.495	132.221			27.6058						389.976		189.015					1693.88
YBL089W	AVT5	Verified	293.505	293.505										293.505
YIR029W	DAL2	Verified	493.961	297.252	120.57		1163	21.6313								297.252
YLR224W	UCC1	Verified	298.775	298.775	137.345			8.6111								588.94
YLR451W	LEU3	Verified	829.944	299.21	98.1357		264	39.9333	205.522		1206.83			299.21			2261.52	1456.72			1610.75					125
YLR024C	UBR2	Verified	387.68	300.681	119.832		271	12.7897			1285.99			330.363		376.736										49.2
YBR156C	SLI15	Verified	322.544	301.5	75.0392	284	638	49.1744																		319
YOL001W	PHO80	Verified	785.908	301.542	134.81		2001	55.1825						301.542
YGR288W	MAL13	Verified	492.019	301.725	118.244			29.2124						301.725				1145.12
YHR150W	PEX28	Verified	487.329	307.517	111.239	377		57.7856						238.033				1276.5
YHR178W	STB5	Verified	447.801	310.037	108.949		439	8.81901			341.074					219.606		1399.31								279
YDL013W	SLX5	Verified	517.848	312	123.493		312	6.61365										1234.93
YCL004W	PGS1	Verified	381.449	312.971	107.906		823	8.37649								312.971
YLR014C	PPR1	Verified	477.762	317	86.6642		317	132.682			491.239					266.001		1181.89
YOL119C	MCH4	Verified	1936.81	317.111	156.789	5440		53.326			317.111
YMR001C	CDC5	Verified	946.861	318.502	136.862		402	18.5411			178.655			3366.97		235.005										1480
YMR179W	SPT21	Verified	318.721	318.721	25.6115		261									376.441
YDL220C	CDC13	Verified	702.286	319	106.977		894	87.7148								277.282								1933.43		319
YLR381W	CTF3	Verified	496.685	319	117.009			25.1018										1145.95								319
YGR096W	TPC1	Verified	319	319			319
YHL028W	WSC4	Verified	320.483	320.483	140.673			1.69669								639.27
YLR352W	YLR352W	Uncharacterized	518.253	322	82.3089	322	1297	218.907			460.829			906.333		297.704										125
YKR064W	OAF3	Verified	479.346	325.927	111.938		516	25.5321								325.927		1380.27								149
YDR085C	AFR1	Verified	328.783	328.783							328.783
YCR039C	MATALPHA2	Verified	333.319	333.319	66.8424			175.777						490.861
YKL125W	RRN3	Verified	469.167	333.816	118.287			23.2047			529.631			41.9142		599.033					1483.22					138
YOL122C	SMF1	Verified	269.791	337.985	65.304		363	10.1946			392.999					312.971
YPR119W	CLB2	Verified	569.1	339	96.6748	599		99.3255			1500.67			307.508												339
YDL176W	YDL176W	Verified	718.91	339	129.943			34.5448						1783.18												339
YDR282C	MRX10	Verified	1844.63	339.019	155.146	5145		49.8567						339.019
YDR421W	ARO80	Verified	482.161	344.588	78.0542		824	19.2852			263.669			470.283		344.588		1134.3								319
YOR071C	NRT1	Verified	543.365	344.588	94.8301		973	16.211			183.506					344.588		1199.52
YPR026W	ATH1	Verified	473.905	344.765	85.9751		977	55.8991			826.498		344.765	165.363
YNL294C	RIM21	Verified	347.936	347.936										347.936
YPL280W	HSP32	Verified	244.515	349.668	81.2072			15.4883	368.39					349.668
YOR391C	HSP33	Verified	244.515	349.668	81.2072			15.4883	368.39					349.668
YNL325C	FIG4	Verified	457.458	349.743	99.6344		381	41.7454						269.848		360.486		1352.67								339
YBR114W	RAD16	Verified	433.841	353	110.446	348	1566	47.3874	467.183		226.856			96.8163		360.486										358
Q0050	AI1	Verified	314.097	353.115	74.1333		234	21.9071			472.231			528.249
YMR322C	SNO4	Verified	481.166	359.029	103.976			15.4883	368.39					349.668				1191.12
YLR446W	YLR446W	Uncharacterized	593.35	361.44	115.943			51.3298			361.44					1367.28
YJR021C	REC107	Verified	361.982	361.982	112.525	650					73.9634
YBR138C	YBR138C	Uncharacterized	365.5	365.5	65.9708		536																			195
YDL073W	AHK1	Verified	510.284	368.229	83.2864		259	68.0728			474.971			771.694		261.487		1226.48
YFR029W	PTR3	Verified	499.287	370.565	106.649		427	4.32337			1251.69					314.131
YPR204W	YPR204W	Verified	370.898	370.898	100.635			106.969					634.828
YOL063C	CRT10	Verified	446.724	374	84.0772		374	60.5864			866.397					807.638										125
YPR021C	AGC1	Verified	538.57	376.386	92.0241		634	449.885		107.368	255.524			1481.75		302.888
YLL033W	IRC19	Verified	376.992	376.992	110.605			82.1479						671.836
YKR051W	YKR051W	Uncharacterized	377.104	377.104												377.104
YPL179W	PPQ1	Verified	371.221	377.222	64.0339		644	9.76499						377.222		506.118										319
YMR180C	CTL1	Verified	378.503	378.503	135.569			15.6626								741.343
YLR127C	APC2	Verified	518.939	387.653	90.9974		165	43.0917						343.306		811.908		1318.33								432
YCL067C	HMLALPHA2	Verified	696.98	388.072	110.548	1836		175.777			285.282			490.861
YDR285W	ZIP1	Verified	626.096	391	71.7795		343											1144.29								391
YMR019W	STB4	Verified	465.351	392.455	108.996		403	27.7224	127.957		729.71					392.455		1477.71								98.9
YPL008W	CHL1	Verified	395.366	394.486	99.2675			17.1993						775.292		690.072										98.9
YBL019W	APN2	Verified	321.849	395.221	63.1581		474	22.9539								376.441										414
YKL098W	MTC2	Verified	543.023	395.675	92.8322			69.7966			141.473			395.675		845.277		1262.89
YPL060W	MFM1	Verified	396	396																						396
YKR061W	KTR2	Verified	345.214	400	89.3051		400	13.1998								622.441
YLR098C	CHA4	Verified	659.587	401.5	86.9696		407	52.3707			351.633							1265.44			1485.07					396
YDR540C	IRC4	Verified	814.961	402.566	111.55			35.0919						402.566				1268.84						2196.31		172
YLR320W	MMS22	Verified	406	406	13.5848	367	445
YOR348C	PUT4	Verified	407.173	407.173										407.173
YMR119W	ASI1	Verified	718.452	410.883	95.4782		220	51.7217								410.883		1383.73			1525.93
YHR131C	YHR131C	Uncharacterized	783.773	413	86.2923		413							313.995				1363.87			1656					172
YGR188C	BUB1	Verified	520.208	414	111.332			1.50387										1145.12								414
YPR061C	JID1	Verified	414	414																						414
YLR035C	MLH2	Verified	927.117	420	130.27	2902	420	5.36549										1236.62								71.6
YOR249C	APC5	Verified	621.149	423.5	109.198		588	23.4604						855.497		143.681					1857.25					259
YJL157C	FAR1	Verified	769.147	425.732	100.431		302	46.4348			1860.76					549.465		1618.23								238
YDL231C	BRE4	Verified	425.839	425.839	141.196	851		0.67869
YDR253C	MET32	Verified	571.806	431.907	112.238		1272	11.5114						431.907
YMR154C	RIM13	Verified	4055.43	432	235.238		427	21.2837	447.963		967.968		25680.9			410.912										432
YMR207C	HFA1	Verified	1277.41	433	135.093	433	1469				238.689	5010.94		127.125				1267.14								396
YFL025C	BST1	Verified	948.775	434.363	114.667		362	4.23299			304.909					506.725				2825.96	1688.82
YDR501W	PLM2	Verified	435.599	435.599	140.708		869	2.19733
YDR369C	XRS2	Verified	687.224	436.864	97.4327		1932	51.5272			908.091			384.012		489.716										358
YPR117W	YPR117W	Uncharacterized	603.905	437.094	94.0528		138	437.094										1236.62
YJL193W	YJL193W	Uncharacterized	447.842	438.585	98.4442		904	10.197						135.827		741.343
YHR124W	NDT80	Verified	440.834	440.834												440.834
YOR003W	YSP3	Verified	1150.59	442.032	105.755		3051		400.194		442.032			172.137								1687.56
YBL066C	SEF1	Verified	582.22	442.326	78.1427	460	1283	77.2643			974.625			273.779		424.652
YLR142W	PUT1	Verified	2280.76	443.494	182.148		1517	15.4092			166.321			443.494				2108.25			11530.8					184
YLL003W	SFI1	Verified	461.649	444.493	17.1514		548			444.493						392.455
YGL144C	ROG1	Verified	524.937	445.652	74.4268	646	277	124.578			445.652					1131.45
YKL176C	LST4	Verified	684.351	445.982	102.327		157	32.6451			185.21			706.753				1258.65				1765.85
YOR296W	YOR296W	Uncharacterized	755.817	448	96.571		448	45.8405			900.056		2015.64			166.266		1414.92								300
YHR035W	NEL1	Verified	450	450																						450
YNR045W	PET494	Verified	481.535	450	50.0045		304		492.422					280.921		880.333										450
YOR193W	PEX27	Verified	829.75	450.5	122.547		519	87.1387												2330.86						382
YNL275W	BOR1	Verified	643.514	451.055	114.776			12.1673								707.111					1659.78					195
YGL136C	MRM2	Verified	590.886	453.245	98.7972		422	41.2635						484.491				1415.79
YIL031W	ULP2	Verified	657.599	453.5	107.703		457	51.9024			713.363			243.42										2029.91		450
YLR238W	FAR10	Verified	668.686	453.721	81.0568		531	298.605						1468.7		376.441
YHR031C	RRM3	Verified	392.457	455	73.5472	559	351	3.82917																		656
YPL103C	FMP30	Verified	664.803	457.073	81.6735			205.289						1346.86		457.073		1136.8								178
YJL057C	IKS1	Verified	644.547	457.073	83.8583		1494	31.6684	287.627					210.997		457.073		1138.46								892
YGL090W	LIF1	Verified	462.862	462.862	126.229			49.7232																		876
YGL131C	SNT2	Verified	555.504	462.99	96.7941		340	14.4329			585.981							1281.6
YJL100W	LSB6	Verified	627.617	467	128.077		467	59.0341			547.88					2007.27										56.9
YLR408C	BLS1	Verified	976.473	468	119.815			146.776												2314.64						468
YER153C	PET122	Verified	468	468																						468
YIR018W	YAP5	Verified	786.323	471.969	96.1696		1649							471.969												238
YGL104C	VPS73	Verified	472	472			472
YLR173W	YLR173W	Uncharacterized	501.435	474.036	76.5168		258	113.329						944.34		690.072
YML043C	RRN11	Verified	706.516	476	64.516		412											1231.55								476
YDR461C-A	YDR461C-A	Uncharacterized	6252.32	476.576	163.494		18055	225.399			476.576
YLR353W	BUD8	Verified	578.513	477	79.2415		477	9.6984			352.083					863.506		1190.28
YKL108W	SLD2	Verified	1167.71	482	143.379		308	55.087											3651.75							656
YJL206C	YJL206C	Uncharacterized	535.955	483.015	97.3211		741	9.29725			225.03							1168.49
YDR022C	ATG31	Verified	1705.92	486	165.781		6705	14.4939			175.647							1148.45								486
YPL148C	PPT2	Verified	711.604	486	57.975			461.051										1187.76								486
YMR164C	MSS11	Verified	693.731	489.716	81.8648		256									489.716		1335.48
YNL063W	MTQ1	Verified	3077.05	489.716	184.621			33.3305						297.491		489.716		1364.73								13200
YOR368W	RAD17	Verified	626.135	489.716	91.6218		1738	44.4914	284.991		824.985			811.764		489.716										189
YIL055C	YIL055C	Uncharacterized	932.646	493.073	113.96		1114	50.3581			496.431		457.361			489.716									2988.01
YER051W	JHD1	Verified	449.303	493.733	75.5993			25.7439			653.035			334.432												784
YHR168W	MTG2	Verified	515.161	496.788	83.7438		471	35.4276	592.209							522.576		1280.75								189
YDR102C	YDR102C	Uncharacterized	497.791	497.791									497.791
YOL036W	YOL036W	Uncharacterized	551.65	500	111.32		500	48.4381			104.43					528.062		1577.32
YKL121W	DGR2	Uncharacterized	567.35	504	65.0503		651	73.8022			932.918		273.836	405.748				1130.14								504
YPL176C	TRE1	Verified	803.174	505	72.9829		505	137.315			1249.35			1725.67		408.525		1200.36								396
YPL177C	CUP9	Verified	8913.28	505.807	192.123			43.6591	490.613				34597.8													521
YGL229C	SAP4	Verified	674.938	506	85.5194		506	30.5757			1257.04							1302.08								279
YOL053W	AIM39	Verified	730.022	506.118	92.1902		762	200.469			309.765			1871.76		506.118
YPL113C	YPL113C	Verified	487.319	506.118	80.3208	869		86.84								506.118
YJL210W	PEX2	Verified	1146.76	506.422	108.373	2961	1901	26.3965						506.422												339
YLR425W	TUS1	Verified	629.889	508.671	97.2104		796	86.5304			508.671					158.715		1599.53
YIL001W	YIL001W	Uncharacterized	442.647	510	79.4742	510		19.9263						929.429		558.88										195
YOR372C	NDD1	Verified	929.335	510.989	111.276		2206	30.3772			89.282			222.978										2228.37		799
YJL094C	KHA1	Verified	676.18	511.523	93.2157		1498	42.579								511.523		1156.8								172
YHR032W	ERC1	Verified	513	513			513
YOL100W	PKH2	Verified	1116.22	515	92.6565		515	228.822	476.203		1860.61			3036.06		360.504		1336.34
YDR160W	SSY1	Verified	515	515		515
YKL038W	RGT1	Verified	712.023	520.105	79.5642		1164	17.2089	520.105		1237.8					392.455		1457.6								195
YPR120C	CLB5	Verified	521	521																						521
YBR201W	DER1	Verified	553.15	522.16	88.6884			56.5652	1111.71					806.319												238
YNL029C	KTR5	Verified	515.183	522.576	67.4681	585	996	22.3379								522.576										450
YIL071C	PCI8	Verified	923.517	522.576	97.5748			16.6204								522.576		1240.85						2333.54		504
YLR241W	CSC1	Verified	1175.14	523	99.1084		523	266.808		325.428	1357.6		3415.38	1915.27		422.484
YLL035W	GRC3	Verified	650.425	523.259	78.7095		563	178.247						483.519		1376.93
YBR184W	YBR184W	Uncharacterized	528	528		528
YCR081W	SRB8	Verified	750.556	533.8	85.1017		723	89.1502			323.049					344.6		1293.54								1730
YKL133C	YKL133C	Uncharacterized	1698.9	535	140.899	4452	535	109.686
YDL028C	MPS1	Verified	718.991	536.074	96.4043		155	9.73494			536.074							1388.05			1506.09
YDR131C	YDR131C	Verified	543.799	537.847	77.8332		970	123.55						537.847
YLR131C	ACE2	Verified	1173.98	538	96.1505	339	422	47.9206			2629.4			3219.33		328.913		1552.52			1488.78					538
YJL106W	IME2	Verified	538	538		538
YJR054W	KCH1	Verified	591.546	538	94.7459			59.7754										1176.86								538
YMR257C	PET111	Verified	538	538																						538
YMR013C	SEC59	Verified	587.823	538.499	99.8721		1198	26.9697						538.499
YIL134W	FLX1	Verified	539.086	539.086												539.086
YDR409W	SIZ1	Verified	831.452	539.562	84.4737		776	46.177			528.665			413.332		539.562	2149.61	1317.47			1563.25					149
YJL090C	DPB11	Verified	1537.38	540	185.304		548	214.428			133.951	7932.05		106.547				1286.72								540
YLR392C	ART10	Verified	707.41	540.294	78.2641	919	1659	117.991			282.194			291.594		344.588		1308.91								736
YHL016C	DUR3	Verified	873.322	541	85.132		541				353.969							1725
YBL009W	ALK2	Verified	626.308	541.144	78.2827		608	21.7915			1223.6			245.766		474.288		1184.41
YJL162C	JJJ2	Verified	676.201	542	95.1201		542	51.479			1634.65					968.869										184
YBR276C	PPS1	Verified	1295.02	542	130.322		542	85.1984						4192.6		312.971		1342.35
YBL025W	RRN10	Verified	1407.99	542.714	130.868		3524	157.27						542.714
YML118W	NGL3	Verified	638.625	544.5	71.0296		675	209.398										1256.1								414
YBR098W	MMS4	Verified	633.008	545.221	91.5797		714	42.4225			1399.17					376.441
YHR078W	YHR078W	Uncharacterized	606.462	549.577	90.3347			24.618						738.669		360.486		1302.08
YOR092W	ECM3	Verified	791.921	550.977	86.1636		1785	55.0563			550.977			413.443				1155.13
YGR287C	IMA1	Verified	489.067	555.651	61.7061			159.551								555.651										752
YDL069C	CBS1	Verified	434.911	556	86.9803			10.9053						737.829												556
YDR128W	MTC5	Verified	733.22	556	76.2996	240	921	78.8473			1116.96					514.572		1705.16								556
YLR154C	RNH203	Verified	2416.46	556	151.198		10269	470.702			172.134			528.019	3595.04			1324.33								556
YLR424W	SPP382	Verified	731.844	556	88.2944		692	65.5878			124.603			1680.91		448.038					1555.77					556
YLR247C	IRC20	Verified	800.002	557.742	84.9655		447	112.866			1297.26			650.154		465.33		1191.96						2092.45		143
YPR031W	NTO1	Verified	649.192	559.798	85.6964	776	235	43.7441			559.798					1412.01		1345.79								172
YDR242W	AMD2	Verified	579.336	561	99.5733		561	11.8589										1165.15
YOR330C	MIP1	Verified	929.37	561.914	96.4169	2216	167	27.3595			746.828					212.925		1995.23			1692.62					377
YGL257C	MNT2	Verified	583.219	562.204	70.1453			14.8621			562.204			613.378		555.651										1170
YOR264W	DSE3	Verified	2423	566.346	169.323	8549		10.301						210.692												922
YML042W	CAT2	Verified	1473.99	569.197	140.877		1524	171.737					5603.77	688.395		406.06										450
YMR053C	STB2	Verified	667.977	570	74.59	570	226											1207.93
YOR032C	HMS1	Verified	571	571			571
YBR270C	BIT2	Verified	571.97	571.97	137.394			16.2877										1127.65
YPR084W	YPR084W	Uncharacterized	535.122	572.269	81.4005		584	65.6405			246.612					572.269		1207.09
YLL057C	JLP1	Verified	573	573		573
YMR172W	HOT1	Verified	2328.63	573.209	190.015		1326	39.4064			731.028	11310.9				415.39										149
YPR196W	YPR196W	Uncharacterized	574.219	574.219	139.579			7.48081										1140.96
YGR108W	CLB1	Verified	575.532	575.532	67.7045						851.065															300
YDR386W	MUS81	Verified	674.063	576.286	89.3234		893	19.2703						576.286				1581.76								300
YJR078W	BNA2	Verified	1060.04	578.475	127.127		832	62.6864		290.103				578.475		3862.07		1645.91								149
YMR155W	YMR155W	Uncharacterized	578.653	578.653	133.971			30.4846										1126.82
YFL027C	GYP8	Verified	608.588	579.941	39.8816		550	171.771	579.941		694.92			982.484		708.001										573
YER007W	PAC2	Verified	807.98	581	96.3496		581	86.3432			661.561			570.994												2140
YPL194W	DDC1	Verified	722.596	581.937	83.8249		1193	100.137			581.937										1499.91					238
YDR198C	RKM2	Verified	1595.89	582.714	152.499		399	176.465			355.939	1933.47		6955.66		582.714										768
YGR249W	MGA1	Verified	582.91	582.91	140.448			4.01348										1161.81
YMR023C	MSS1	Verified	2481.88	584	183.96		584	51.3148			438.212			430.672	12691.4	2409.52										768
YIL159W	BNR1	Verified	2854.79	584.486	141.759	9570	271	137.644			733.125		9034.58	2397.11		435.848										259
YIL177C	YIL177C	Uncharacterized	584.788	584.788	12.1014								634.828	534.748
YJL225C	YJL225C	Uncharacterized	584.788	584.788	12.1014								634.828	534.748
YLR467W	YRF1-5	Verified	584.788	584.788	12.1014								634.828	534.748
YLR135W	SLX4	Verified	600.234	587	92.6431		900	8.89378										1218.04								274
YKL090W	CUE2	Verified	638.628	588.94	65.1382			81.5807			788.976			511.383		588.94		1222.26
YCR014C	POL4	Verified	919.99	588.94	69.9863		509									588.94		1662.03
YMR270C	RRN9	Verified	638.763	588.94	80.8994		262	81.4953			1384.84			876.541		588.94
YCR007C	YCR007C	Uncharacterized	590.18	590.18	130.983			43.5631										1136.8
YJL149W	DAS1	Verified	824.695	590.474	114.394	2635	885	52.2189						772.423		408.525										195
YMR055C	BUB2	Verified	711.732	590.54	64.8112			456.878						311.454		724.201		1354.39
YBR018C	GAL7	Verified	590.915	590.915	134.431			29.2074										1152.62
YPL041C	MRX11	Uncharacterized	591.317	591.317	136.04			22.4993										1160.14
YLR023C	IZH3	Verified	652.402	591.889	102.294			17.3482			1347.97			591.889
YGL162W	SUT1	Verified	670.155	593.221	101.179			31.4491	86.442					63.8407				1271.39			1467.8					1100
YMR137C	PSO2	Verified	616.053	595	93.8255		931	14.7162										1259.5								259
YJR061W	YJR061W	Uncharacterized	725.999	596	58.033	385	596											1197
YOR019W	YOR019W	Verified	597	597			597
YDR524C	AGE1	Verified	742.719	597.074	89.2329		1376	88.792	174.336		597.074			1898.87		667.962										396
YBR168W	PEX32	Verified	598.499	598.499	138.842			10.9155										1186.08
YCR106W	RDS1	Verified	624.024	598.616	98.159		210	8.74015						987.232				1290.13
YBR243C	ALG7	Verified	744.005	598.776	107.026		224	12.6193						973.552								1765.85
YEL041W	YEF1	Verified	717.126	599.72	81.6024		577	15.8335						1619.82		622.441		1167.66								300
YGR212W	SLI1	Verified	602.588	602.588	11.0157						649.526					555.651
YOR100C	CRC1	Verified	679.203	603.415	66.8357	986	1211	23.3284					603.415			572.269
YKR019C	IRS4	Verified	982.33	605.664	114.866	3247	352	21.3326	61.2179		1341.47					605.664		1247.63
YDL093W	PMT5	Verified	540.224	605.664	75.2403		910	105.008								605.664
YDR254W	CHL4	Verified	2328.63	606	131.892			37.513						166.356					7114.77						3718.51	606
YNL018C	YNL018C	Uncharacterized	606	606		606
YHR006W	STP2	Verified	1638.32	610.193	150.639		186	54.2716			859.901					360.486								1879.27		6490
YOL116W	MSN1	Verified	772.566	611.926	97.0818		1815	51.4096								732.853										491
YDR541C	YDR541C	Verified	554.858	613	68.6571		613	42.5343			1064.68			363.997		690.072
YOL114C	PTH4	Verified	619.406	619.406	133.987			32.563										1206.25
YNL333W	SNZ2	Verified	1802.49	619.782	135.681			173.032					4614.67	619.782
YOR162C	YRR1	Verified	684.379	621.985	83.7389		931	122.774								312.971		1370.77
YDL139C	SCM3	Verified	1130.08	622.441	101.935		819	246.84			1445.18			614.608		622.441			3606.51							556
YKL171W	NNK1	Verified	621.27	622.507	98.6034		1056	7.67143								189.015		1232.39
YER147C	SCC4	Verified	787.127	622.526	73.113	1744	584	62.8961						622.526		312.971		1276.5								907
YBR141C	BMT2	Verified	803.608	623	85.6203			11.5883			314.711			227.348		1113.19		1768.44			1566.99					623
YJL214W	HXT8	Verified	623	623																						623
YNL184C	YNL184C	Uncharacterized	623	623																						623
YCR066W	RAD18	Verified	710.125	623.46	76.9216		1625	65.0244	623.46		706.004			1206.3		539.086										206
YMR319C	FET4	Verified	1042.03	626.866	91.4542		681	197.268			626.866			1698.83		585.093				2932.14						573
YLR107W	REX3	Verified	831.414	627	52.4094		627	384.248						579.446		1131.45		1434.92
YPL042C	SSN3	Verified	2399.29	627.734	133.643	6792	448	76.8517			942.465			627.734	7352.35	555.651
YGL003C	CDH1	Verified	2072.64	632.134	160.245			11.3867	998.267			7014.92				266.001
YBL091C-A	SCS22	Verified	892.278	632.403	82.8947		1925	118.298						540.605		724.201						1687.56				358
YPR005C	HAL1	Verified	632.54	632.54										632.54
YGR217W	CCH1	Verified	1198.47	633.408	136.584		585	16.7037			681.815					266.444		1203.72							4437.15
YOR324C	FRT1	Verified	539.109	634	80.8347	634	1198	13.0459			872.587			90.0167		707.111										259
Q0130	OLI1	Verified	634.461	634.461										634.461
YOR067C	ALG8	Verified	695.468	634.527	77.7761			223.544						1018.58		250.471		1289.27
YHR218W	YHR218W	Uncharacterized	634.828	634.828									634.828
YDR545W	YRF1-1	Verified	793.345	634.828	45.9675								634.828	534.748				1210.46
YER190W	YRF1-2	Verified	1493.8	634.828	131.393			106.969					634.828	3739.61
YGR296W	YRF1-3	Verified	1493.8	634.828	131.393			106.969					634.828	3739.61
YOR396W	YRF1-8	Uncharacterized	767.682	634.828	41.7764								634.828	534.748				1133.47
YEL072W	RMD6	Verified	635.737	635.737	126.725			66.0665										1205.41
YKL023C-A	YKL023C-A	Uncharacterized	2828.45	636.49	137.877		7331	517.849						636.49
YML132W	COS3	Verified	574.684	639	81.6893			76.3866						1008.67												639
YJR015W	YJR015W	Uncharacterized	1021.76	639	118.974			24.7155			1026.39			175.621		408.525		1295.24	3582.84							639
YPL209C	IPL1	Verified	902.719	639.27	100.225		807	27.4155						621.249		639.27		1388.05		2687.05						149
YLR283W	YLR283W	Uncharacterized	869.375	639.27	85.9552		1885	146.682			1396.97			278.959		639.27
YPL071C	YPL071C	Uncharacterized	687.124	641.25	82.1358			109.88						349.199		933.301		1356.12
YER041W	YEN1	Verified	1376.05	642	146.798		642	30.863				4895.33						1181.05								131
YKR096W	ESL2	Verified	710.176	642.525	85.3338		444	29.011			154.774			924.51		841.051		1541.03			1552.03					195
YGR062C	COX18	Verified	811.411	644.483	79.3758			25.6736						644.483				1291.83			1627.06					468
YDR142C	PEX7	Verified	872.618	644.543	74.0504		1357	78.2918			449.522			644.543		968.896						2021.08				589
YOR134W	BAG7	Verified	645.07	645.07	138.803			11.9417										1278.2
YNL082W	PMS1	Verified	595.298	647.928	73.982		883	41.0357			774.857			161.62				1190.28								521
YPL149W	ATG5	Verified	769.51	648.036	64.8238		1458	185.086						399.705		690.072		1278.2								606
YGR197C	SNG1	Verified	648.243	648.243	62.7774		936									360.486
YMR025W	CSI1	Verified	774.774	648.936	104.346			85.8945			115.144			1715.33				1182.73
YIL049W	DFG10	Verified	733.883	649.526	74.1041			244.099					965.39	333.663				1392.38
YOL075C	YOL075C	Verified	4922.78	651.352	157.508	13873	244				651.352
YFR019W	FAB1	Verified	1181.49	651.718	94.2066	368	1382	127.87			2274.09			367.005		651.718	2136.57							3177.2		149
YPL052W	OAZ1	Verified	655.835	655.835	133.653			36.0261										1275.64
YOR022C	DDL1	Verified	958.26	656.987	80.918		2155	138.654			1655.3			577.974		486.629										736
YMR032W	HOF1	Verified	1701.77	657.914	123.923		378	12.0464			657.914			1443.73										5535.25	3690.46	195
YGR053C	YGR053C	Uncharacterized	659.135	659.135	137.716	1301		17.2692
YDR184C	ATC1	Verified	881.434	659.683	69.1784						451.529					473.367		1754.84								846
YJL127C	SPT10	Verified	940.729	659.958	74.1404		781	58.5135			538.916			466.41		506.118					1608.25			2066.63		1500
YHR182W	YHR182W	Verified	946.868	662.881	91.7473		322	51.2706			877.134			2262.18		448.628										1720
YBR097W	VPS15	Verified	775.145	664.696	60.539	981	591	65.8613			664.696			1045.38		564.74		1242.54			1542.08					279
YDR370C	DXO1	Verified	1387.25	665.056	148.461			10.03			290.112			143.813				1397.57	5442							1040
YLR228C	ECM22	Verified	847.372	669.075	76.8116		1426	150.293			1678.1			669.075		528.496		1401.04								78.6
YLR383W	SMC6	Verified	2578.52	669.237	203.557		596	122.112			1571.41			742.475		376.441		1372.5		15508.2						339
YLL061W	MMP1	Verified	762.23	669.381	80.9035		891	149.019						669.381		360.486		1741.26
YDR125C	ECM18	Verified	670.419	670.419	111.256													1197.84								143
YOL095C	HMI1	Verified	2516.9	670.621	170.257	10136	425	27.69						670.621				1325.18
YPR022C	SDD4	Verified	1129.4	670.956	112.907		1634	88.1266						868.083		473.829			3474.36							238
YLR313C	SPH1	Verified	672	672																						672
YJL129C	TRK1	Verified	672.203	672.203	122.487		90											1254.41
YJL092W	SRS2	Verified	1354.84	672.567	144.219		161	26.6708			1031.72					313.417		1406.24								5190
YMR088C	VBA1	Verified	605.438	673.086	94.323			3.55961						1139.67		673.086
YER039C-A	YER039C-A	Uncharacterized	674.958	674.958	120.699													1251.02								98.9
YDR466W	PKH3	Verified	881.84	675.96	75.1393		1650	158.661	678.899		673.02			1747.19		383.27
YFR022W	ROG3	Verified	631.921	678.386	88.6869		1040	5.76475			316.772							1165.15
YDR259C	YAP6	Verified	681.762	681.762	138.616			13.5248																		1350
YIL046W	MET30	Verified	999.46	682.13	121.745		1064	162.645			143.651			399.911		964.348		1234.08							3810.04	217
YGR070W	ROM1	Verified	697.792	684.024	52.5583		273							779.107		588.94		1150.12
YML109W	ZDS2	Verified	992.397	691.052	94.5663	2081	310	65.3893			2572.07			739.258		642.846		1423.61								105
YJL181W	RBH1	Uncharacterized	708.004	693	80.4592	693	146											1285.01
YPL253C	VIK1	Verified	7238.74	693.316	164.876			8.56266			693.316							21014.3
YGL258W	VEL1	Verified	693.507	693.507									693.507
YEL025C	YEL025C	Uncharacterized	1621.07	693.632	141.184	4980	117									219.606		1167.66
YNL202W	SPS19	Verified	863.334	693.678	93.9909		1023	126.531					1939.45	364.355
YPR122W	AXL1	Verified	1252.54	694.175	146.012		300	73.7964	507.208		765.351			1020.5		1025.75		5704.71								623
YPL095C	EEB1	Verified	799.741	695.246	36.6741						695.246							1130.98								573
YDL142C	CRD1	Verified	743.583	698.597	15.684									698.597		656.152										876
YNR064C	YNR064C	Verified	699.548	699.548	94.9715			229.767										1169.33
YNL078W	NIS1	Verified	972.314	701.16	82.0131		2008	33.957						587.58		814.74					1885.61					504
YML088W	UFO1	Verified	776.809	702.463	64.1576		743	176.14			731.839			1697.79		673.086										639
YCL036W	GFD2	Verified	718.737	703.953	85.0705		157	70.6836			1401.27			703.953		1260.78
YDL200C	MGT1	Verified	704.386	704.386	98.2283									215.134				1193.64
YOL128C	YGK3	Verified	789.178	704.687	90.5408			66.4647			1020.87			388.506				1680.87
YIL156W	UBP7	Verified	857.089	706.97	55.491		492	221.444	1411.91		1300.34			807.94		544.619		1472.46								606
YNL025C	SSN8	Verified	734.513	707	90.0531		707	22.1599						142.742				1350.09			1450.57
YJL139C	YUR1	Verified	1758.54	707	147.952		707	271.092			761.698			652.924												6400
YDR265W	PEX10	Verified	1541.6	707.111	144.698			82.389						304.938		707.111		1148.45							5465.12
YGR098C	ESP1	Verified	977.014	707.255	118.072			6.20524			2487.34					149.069		1265.44
YJL156C	SSY5	Verified	759.599	707.706	29.4836		774				1067.33			641.413		555.651
YJR039W	YJR039W	Uncharacterized	2050.35	709.326	155.407		291	6.43035					6776.31					1127.65
YPL089C	RLM1	Verified	1106.87	709.5	106.399	683	4061	53.916	1032.73		451.384			287.641		376.441		1726.8			1659.78					736
YFR045W	YFR045W	Uncharacterized	928.83	710.311	100.675		326	113.699			1094.62			2181
YBR294W	SUL1	Verified	710.999	710.999	96.6677		225											1197
YDL104C	QRI7	Verified	763.206	712.459	57.5652		1019	87.1945	410.263		654.847			770.071		522.576		1241.7								1400
YBR239C	ERT1	Verified	1100.36	713.219	121.733		690	27.6456			713.219					845.277		1391.51	3949.37							85.5
YDL133W	SRF1	Verified	1289.88	713.989	123.085		4044	19.1302			1100.03			713.989		572.269
YDR351W	SBE2	Verified	1028.43	716.279	86.9505	624	2236	40.7711			2027.74			808.558		433.495
YDR181C	SAS4	Verified	928.222	718.423	79.8064		2090	58.9802			1510.14			668.847		473.367										768
YNR069C	BSC5	Verified	719.901	719.901	139.692		1431	8.80128
YOR047C	STD1	Verified	720.862	720.862	94.7297													1203.72								238
YJL023C	PET130	Verified	721	721																						721
YPR101W	SNT309	Verified	1025.58	721	78.7669		657	31.6486								1904.68					1813.59					721
YBR021W	FUR4	Verified	755.765	721.059	86.8303		567	3.18465			1577.76			875.118
YKL124W	SSH4	Verified	955.768	721.816	101.978		2304	75.4398								993.632										450
YER077C	MRX1	Uncharacterized	1456.51	722	78.9527	719	722	172.262			2360.41			3026.07		694.37					1861.12				3121.35	432
YJR141W	IPA1	Uncharacterized	723.069	723.069	135.146			32.0862										1414.05
YMR094W	CTF13	Verified	9254.14	724.201	210.614		928	4.18706			499.97				44114.4	724.201
YOR258W	HNT3	Verified	901.998	724.201	77.8289			188.445								724.201		1285.86						1915.48		396
YLR234W	TOP3	Verified	799.165	727	72.1148	986	461	22.5432										1374.22			1483.22					468
YDR291W	HRQ1	Verified	1041.03	727.437	99.0533	3390	1134	112.613			799.455			655.418		649.109		1328.61								259
YPL269W	KAR9	Verified	1105.8	728	91.0463		800	2.60483					2040.42			506.118								2629.65		656
YMR066W	SOV1	Verified	744.397	730.859	77.111	1299	759	52.2463			730.859					297.288		1676.38								396
YLR281C	YLR281C	Uncharacterized	731.077	731.077	131.78			49.8386										1412.32
YLR289W	GUF1	Verified	2031.41	731.472	160.429	9267	359	62.0144						731.472		376.441		1533.97								1890
YER093C	TSC11	Verified	686.227	732.706	87.7998		892	56.9336			732.706					189.015		1560.48
YCR076C	FUB1	Verified	691.968	735.593	73.2118			159.89								1113.19		1136.8								358
YGL216W	KIP3	Verified	1290.56	736	75.319		643	52.3112						714.902		2386.74		2379.12			2121.85					736
YDL107W	MSS2	Verified	870.736	736	64.8027		1284	125.129			602.592			1604.4		344.588		1398.44								736
YJR124C	YJR124C	Uncharacterized	835.209	736.303	96.6773			81.7601								736.303						1687.56
YOR012W	YOR012W	Uncharacterized	736.984	736.984	76.8803								336.341					1137.63
YGR016W	YGR016W	Uncharacterized	851.438	737.115	79.6146									737.115								1579.2				238
YOR159C	SME1	Verified	2246.95	737.117	134.698		3422	205.651			918.235			442.989		7936.84										556
YOR334W	MRS2	Verified	774.324	737.555	70.0524		1554	4.18376			443.318					707.111		1169.33								768
YOR256C	TRE2	Verified	703.786	737.775	61.8429		571	49.6505	1098.23		1285.89			737.775		883.961										300
YLR183C	TOS4	Verified	766.273	740	85.0838	1614	740	8.95743										1184.41								284
YKL201C	MNN4	Verified	1050.91	740.003	95.6378	196	2788	8.55801			1920.52			740.003		468.358		1234.93
YDL216C	RRI1	Verified	718.842	741.543	73.9003		810	49.9327								673.086		1342.35
YGL208W	SIP2	Verified	1044.6	743.301	94.3742		2931	258.784	169.789		1874.81			323.959		1335.8		1162.64								300
YAL051W	OAF1	Verified	1272.35	744	99.3841	3131	744	60.0823			2832.54			554.279		1492.28										92.3
YDR213W	UPC2	Verified	871.66	745.758	84.4855		463	110.905			739.515		2360.86	946.083		173.827		1427.09								752
YGR141W	VPS62	Verified	712.136	745.958	56.2335		316	201.739			1134.44		868.915	1128.73												623
YLR423C	ATG17	Verified	2535	746.083	191.146		2305	74.1838			635.209		14405.7	433.615		856.958		1211.3								358
YBR274W	CHK1	Verified	887.883	747.948	97.0478			81.6303	322.151		897.618			804.849		691.048										2530
YIL151C	ESL1	Uncharacterized	903.464	749	87.5054		749	10.4174			972.844					318.628		1386.32						2383.04		504
YLR360W	VPS38	Verified	964.442	749	85.8655		749	99.9416			264.549			695.892				1279.9		2591.81						1070
YBL106C	SRO77	Verified	785.549	749.154	87.2029			2.94547			574.585		923.722									1640.94
YLR007W	NSE1	Verified	1775.29	749.558	138.575		6065	96.7579			399.266			749.558		1565.86
YBR183W	YPC1	Verified	750.835	750.835	31.0327									586.076		915.594
YDR488C	PAC11	Verified	671.105	752	91.2206			22.4936								1238.82										752
YER173W	RAD24	Verified	927.976	752	74.2255		741	13.7239										1266.29						1866.87		752
YJR156C	THI11	Verified	752	752																						752
YDR132C	YDR132C	Verified	699.434	753	63.5164	753	643	67.6764						910.021		1131.45		1218.89								172
YPL022W	RAD1	Verified	692.735	753	63.0218	250	753	90.753			916.502			841.58		597.312										1400
YOR023C	AHC1	Verified	651.507	753.625	61.1941		803	31.7999			1121.18			704.25		909.816										339
YOR156C	NFI1	Verified	1199.72	754.578	84.8558		845				618.019			664.155		489.716		1411.45								3170
YBL060W	YEL1	Verified	798.334	755	63.0912		755	37.079			1186.55			386.215		595.551		1160.14			1467.8
YPL248C	GAL4	Verified	755.465	755.465	110.347													1344.93								166
YDR419W	RAD30	Verified	1882.79	756	128.408		756	91.9599			652.984			6052.99												1860
YJR053W	BFA1	Verified	1079.5	756.243	107.967		1152	31.3933			229.832			346.77		360.486			3594.68		1540.84					1380
YKL020C	SPT23	Verified	1394.27	757.354	128.738	562	283	40.507			1517.5	6220.84	1777.6	729.958		784.75						1594.59				432
YEL064C	AVT2	Verified	758.536	758.536												758.536
YMR021C	MAC1	Verified	3627.08	759.121	173.457		2061	23.9003	491.362					759.121												14800
YEL061C	CIN8	Verified	1579.77	763	110.415		763	81.1516			3657.52			4368.49		376.441		1573.77								238
YDL183C	YDL183C	Verified	763.725	763.725	129.487		1463	64.4508
YKL174C	TPO5	Verified	855.373	763.948	78.0724		904	151.422			1742.18			623.895
YDR334W	SWR1	Verified	1072.28	765.233	100.311	3459	692	89.4994			1174.6			838.465		148.779		1519.87								656
YKL175W	ZRT3	Verified	1526.33	765.544	120.066		811	86.011						276.127	4881.8	720.087						2382.94
YOL113W	SKM1	Verified	1847.71	766.029	120.153	4216		15.7382			397.756			5084.45				1134.3								238
YKR015C	YKR015C	Uncharacterized	766.061	766.061	70.9009	382												1150.12
YDL149W	ATG9	Verified	737.024	767.223	85.8566		1356	57.6502			1188.38					346.068
YDR323C	PEP7	Verified	1375.19	768	94.1413	2739		68.7119								506.118								2794.11		768
YOL078W	AVO1	Verified	1531.16	769	155.52	769	1180	77.0479	260.761		1311.38			7752.1		312.971		1413.18								704
YKL034W	TUL1	Verified	1376.56	769.495	152.219		990	116.388	599.421		933.152			153.871		605.837		1133.47				6480.33
YER144C	UBP5	Verified	798.846	771.195	75.3846		1430	124.845						1191.82		350.57		1395.84								300
YNR061C	YNR061C	Verified	833.207	773.097	70.638		960	116.233						586.195				1427.09			1570.73					339
YOR149C	SMP3	Verified	773.233	773.233	71.3741									382.99				1163.48
YLR099C	ICT1	Verified	899.911	775.05	25.7038									775.05		757.861		1166.82
YBR255W	MTC4	Verified	872.613	775.563	82.5281		1274	99.4724			1982.33					328.75		1155.13								396
YOL017W	ESC8	Verified	853.933	775.782	88.4759		1103	5.24127			198.797					775.782		1236.62						2226.09		432
YGL075C	MPS2	Verified	1182.66	775.782	119.899		1083	93.4961						336.119		775.782				3624.9
YKR004C	ECM9	Verified	886.063	776.555	75.2183	1794					197.141					707.111										846
YFR043C	IRC6	Verified	1506.22	778.222	122.569		403	568.017			997.39			778.222		4784.47
YLR176C	RFX1	Verified	1152.11	778.758	124.566		896	35.4902			213.676		4789.72	778.758		681.42		1145.12			1451.8					377
YBR150C	TBS1	Verified	1664.81	779	136.722		779	48.6196	5661.36									1262.04								573
YDR520C	URC2	Uncharacterized	769.244	779.836	55.2453		567	75.0014	779.836		1072.64					555.651		1397.57								937
YJR090C	GRR1	Verified	1579.22	780.287	117.472		805	37.5082			755.574	3005.08		4677.9		194.261
YGL163C	RAD54	Verified	781.935	781.935	105.249		200											1363.87
YAL056W	GPB2	Verified	941.468	782.167	84.2036		902	59.6448			1942.54		284.064	662.333		305.47		1145.12						2230.57
YJR129C	EFM3	Verified	1100.02	782.807	84.7854		1080	185.71		733.58	832.033			691.134		539.086									3188.59	1550
YIL097W	FYV10	Verified	1090.04	784	75.756		1086	509.901	625.118		558.971			763.995		796.382		1570.23						3115.79		784
YNL260C	LTO1	Verified	1279.71	784	85.0458		645	121.063								2676.2		2172.29								784
YER158C	YER158C	Uncharacterized	719.485	784	41.6994	982										392.455										784
YGL045W	RIM8	Verified	1589.82	784	112.081		2367	230.753			942.906		5339.39	699.404		765.306										784
YDR247W	VHS1	Verified	1322.32	784	64.7111		512				688.568					605.664	2092.72	2484.38			2088.92					784
YLR265C	NEJ1	Verified	1062.96	786.891	102.024		2821	52.5698			786.891							1277.35								377
YKL132C	RMA1	Verified	787	787		787
YKL109W	HAP4	Verified	789.616	789.616	65.9118						421.602							1157.63
YGR143W	SKN1	Verified	754.785	791.11	60.1136		1219	54.7468			926.113			656.108		1204.74										468
YEL004W	YEA4	Verified	795.095	795.095	106.545									196.079				1394.11
YMR199W	CLN1	Verified	796.471	796.471	84.7798													1273.94								319
YPL224C	MMT2	Verified	797.56	796.574	81.255	1221	1756	35.2651			179.945			936.997		656.152
YJL095W	BCK1	Verified	1006.9	798.251	81.0333		608	130.901			1733.29	2363.98		798.251		228.046		1508.43				1579.2				112
YPL133C	RDS2	Verified	904.06	799	70.4491		1753	71.4831	410.04		1467.74					440.834		1386.32								799
YOL008W	COQ10	Verified	965.487	800.584	103.887		2179	204.687			81.781			1396.48
YNL328C	MDJ2	Verified	1156.77	801.894	93.6311			131.302	232.112		1030.79			500.523				1746.69	3372.43		1667.35					573
YMR252C	YMR252C	Uncharacterized	803.461	803.461	111.147													1434.92								172
YPL150W	YPL150W	Uncharacterized	1196.19	804.499	84.7836		491	70.0089			804.499			338.481		432.653	2343.62	1637.87			1639.63				3007.91
YJR140C	HIR3	Verified	998.467	804.831	86.3051	598	231	88.8384						687.663		1078.32		1612.88		2769.03						922
YDR393W	SHE9	Verified	778.616	805	80.7108		805	28.3833						1485.45				1295.24								279
YKL219W	COS9	Verified	775.727	806.777	49.2768		1150	337.497			514.39		1099.16	1112.48		440.834
YNL033W	YNL033W	Uncharacterized	807.443	807.443	72.0631													1218.89								396
YKR086W	PRP16	Verified	832.998	810.233	36.2319	297	860	963.616			760.467			620.277		759.169		1153.46								1250
YHR156C	LIN1	Verified	862.848	810.719	73.3178		499	171.69			2039.68			822.439		845.277										799
YHR166C	CDC23	Verified	1049.06	811.231	94.6675		404	72.3495	827.035		230.653			1410.12		795.426		1561.37			1901.11				3208.83	79.7
YMR162C	DNF3	Verified	957.708	812.342	90.0012		162	75.9599			1455.29			346.486		284.286		1278.2		2426.1	1633.35
YDR436W	PPZ2	Verified	998.249	813.128	71.1588	730	2482	236.033			858.034		785.983	813.128				1324.33			1565.74					189
YLR047C	FRE8	Verified	727.629	814	73.3627		814	155.902										1212.99
YJR119C	JHD2	Verified	1523.23	814	143.207		814	189.05			1396.97					281.595		1355.25							6335.78	290
YNL234W	YNL234W	Verified	1074.71	814.571	77.4517		1557	100.697			2382.61			805.678		814.571		1667.41								195
YJR011C	YJR011C	Uncharacterized	1627.55	815.212	111.283		5358	113.812			758.67			815.212		656.152		1130.98								2560
YPR193C	HPA2	Verified	817.531	817.531	62.3043								457.361					1177.7
YIR031C	DAL7	Verified	3673.66	817.679	191.575		2125	37.1045	292.678		1276.31		17951.8	359.051
YHL008C	YHL008C	Uncharacterized	843.451	819.444	76.5338		1266	10.9085			819.444					468.683					1652.22
YOR178C	GAC1	Verified	822.208	822.208	37.6327		1041						603.415
YHL040C	ARN1	Verified	823	823			823
YOR093C	CMR2	Uncharacterized	1001.57	823.272	103.4	3170	1105	72.4853			541.545			1452.7		302.874		1326.9								41.1
YOL047C	LDS2	Verified	823.369	823.369	114.799													1491.74								155
YBR210W	ERV15	Verified	790.982	825.06	71.3411			234.352			375.326					1279.46		1274.79
YMR280C	CAT8	Verified	918.906	827	79.2479		827	7.50296	629.03									1140.12						1990.87
YLR271W	CMG1	Uncharacterized	1542.61	829.896	132.893		4464	46.6652						189.793												1470
YDL180W	YDL180W	Uncharacterized	1170.12	830.114	97.0955		3204	44.3551			561.403			486.696		1098.83						1625.46
YGR004W	PEX31	Verified	1028.71	830.913	83.0767		834	170.166			261.927		1944.62			827.827		1503.15				2450.01				238
YLR151C	PCD1	Verified	811.127	831.5	92.2417		1425	93.1683								1488.34										238
YHR100C	GEP4	Verified	1351.39	835.123	116.714		539	297.026		1306.71	835.123		995.527	635.402		4850.97
YHL010C	ETP1	Verified	861.354	835.221	77.457		1719	133.389			305.112					835.221		1314.05
YCR091W	KIN82	Verified	807.35	835.623	88.3392		1506					835.623		80.4273
YKL217W	JEN1	Verified	835.818	835.818	65.9577		446											1225.64
YPR030W	CSR2	Verified	836.196	836.196	77.4922		378											1294.39
YDL146W	LDB17	Verified	1079.18	837.9	94.0636		1078	32.4328			597.8			374.67				1557.83		3186.02	1477.67					329
YNL242W	ATG2	Verified	1078.58	841.5	85.2815	190	807	259.382			1068.66	1077.4		657.997		751.314			3394.84			1703.16				876
YNL211C	MRX7	Uncharacterized	1237.65	842.165	105.691			528.368						165.029				1155.96							3101.25
YKL198C	PTK1	Verified	786.461	844	61.9495	710	844	14.3751						1056.72				1307.2
YOR058C	ASE1	Verified	1972.67	844.017	144.652			5.659			6196.99			1132.03												556
YPR164W	MMS1	Verified	920.54	845.638	65.8539		1024	112.158			394.062		811.728	1978		845.638		1278.2
YML068W	ITT1	Verified	2475.85	846	143.993			17.0502	6564.5																	846
YLR404W	SEI1	Verified	1221.23	846	91.3507			85.0624								743.888		1396.71							3034.51	846
YOR295W	UAF30	Verified	838.424	846.369	76.6572			71.209						1053.74				1589.75								639
YDR014W	RAD61	Verified	1265.31	848.104	89.1316		820	31.7375			640.043			876.209				1314.05	3652.84					2066.63		721
YPR106W	ISR1	Verified	848.513	848.513	54.5865													1176.03								521
YCR068W	ATG15	Verified	1150.02	849.693	94.4816		2124	111.385			358.211			322.073		849.693		1224.79								3060
YLR128W	DCN1	Verified	977.616	850.475	85.334		2458	94.4761			850.475		410.779	264.992		1507.64		1256.95
YDR444W	YDR444W	Uncharacterized	1071.85	850.527	65.1157	749	498	204.284			1061.37			493.776		850.527					1648.44			2071.21		2070
YDR076W	RAD55	Verified	1104.82	853.5	103.539	2697	657	15.2854																		1050
YNL249C	MPA43	Verified	739.805	853.504	56.0098		290	160.109			1151.55			853.504		525.02		1148.45								1050
YAR018C	KIN3	Verified	938.843	856.018	84.4859			116.781			1189.46			1926.56		522.576
YGR221C	TOS2	Verified	856.676	856.676	132.028																	1656.45				56.9
YDR451C	YHP1	Verified	856.932	856.932	63.7783									470.472				1243.39
YGR258C	RAD2	Verified	843.566	860.015	72.7977		934	111.572			874.03			386.765		329.205	2065.75	1201.2								846
YHL032C	GUT1	Verified	905.417	860.792	72.6908	1098	1137	101.573			623.585	1988.08				484.264
YPR068C	HOS1	Verified	692.508	861	63.0956		861	11.148								915.594		1136.8								538
YPR134W	MSS18	Verified	922.324	861	54.4077		1461	93.1049			837.023			561.283		1512.71		1130.14								861
YDR514C	YDR514C	Verified	1054.88	862.739	87.337		614	209.727			2395.41			1873.67		1111.48										125
YPR085C	ASA1	Verified	727.237	862.78	57.9206		1064	254.932								862.78
YDR009W	GAL3	Verified	1256.09	862.821	113.59		532	12.717								1004.64		1224.79	4041.4							721
YPL092W	SSU1	Verified	865.395	865.395	6.47214		905				825.79
YOR344C	TYE7	Verified	1540.62	865.966	128.132		4404	26.5529										1245.93								486
YBR038W	CHS2	Verified	842.31	866.685	72.6293		770	78.5052			963.371			1360.29		240.751						1640.94
YJL212C	OPT1	Verified	1707.41	866.917	115.204		865	23.8669			1189.11			866.917		457.073							5679.88			2870
YDR350C	ATP22	Verified	867.186	867.186	69.5298											440.834		1293.54
YPL072W	UBP16	Verified	1305.51	867.506	102.248			89.1258						244.876				1285.01	3430.48	2333.57						450
YER162C	RAD4	Verified	1016.8	869.809	94.0315		548	109.517			869.809			2996.15		393.791		1324.33								876
YLR371W	ROM2	Verified	1058.62	871.202	66.78	409	810	205.258			2241.41			1254.33		871.202		1619.12
YNL047C	SLM2	Verified	1183.6	872.875	82.8615	2733	915	42.0152	436.478		830.75			694.449		1207.14										2610
YAL040C	CLN3	Verified	873	873			873
YBL031W	SHE1	Verified	810.621	873.742	60.2645		1231							532.813				1214.67								264
YPR046W	MCM16	Verified	1159.24	875.559	105.928			121.938								2763.9					1472.12					279
YKL188C	PXA2	Verified	881	881		881
YBL113C	YBL113C	Uncharacterized	881.266	881.266	75.787		409											1353.53
YPL029W	SUV3	Verified	868.483	881.732	75.259		486	38.8573			242.462			1277.46		328.75		1602.2			1532.14					1440
YGR071C	ENV11	Verified	847.381	883	50.842		883	52.1088			732.622			974.166		758.556		1481.22								1050
YDR506C	GMC1	Verified	847.099	885.026	78.3074			54.5038										1181.05				1563.84				589
YMR224C	MRE11	Verified	985.661	888	78.1255		888	123.5			1287.75					506.118		1219.73		2442.54						432
YGR099W	TEL2	Verified	1045.73	888.52	79.4452		1328	135.078			2497.59			1139.04		536.648										638
YKL185W	ASH1	Verified	896.373	889.077	68.5308		627	38.7645	330.9		1331.92					889.077		1256.95								1800
YPL168W	MRX4	Uncharacterized	1009.22	889.824	79.2574	727	1215	225.686			166.491			889.824				1320.9		2519.63
YLR105C	SEN2	Verified	928.557	891.759	85.7439			25.4153			891.759			907.797		440.834		1597.75		2317.34						319
YDL155W	CLB3	Verified	1085.34	892	43.4343											741.343		1622.69								892
YDL105W	NSE4	Verified	849.683	892.008	67.4749		389	87.5648			1588.2			625.79		1158.23		1249.32
YNL218W	MGS1	Verified	1615.4	893.5	127.182	6494	607	237.758			2035.13			592.352		462.916		1314.05								1180
YDR058C	TGL2	Verified	975.209	893.762	86.6771		2295	281.254			213.23			893.762				1192.8
YKL163W	PIR3	Verified	894.972	894.972	59.7496								516.853					1273.09
YHL050C	YHL050C	Uncharacterized	896.647	896.647	41.2947								634.828					1158.47
YHR210C	YHR210C	Uncharacterized	757.883	897.938	88.3864			29.0625								897.938		1346.65
YDR026C	NSI1	Verified	1180.78	897.938	94.6591		500	40.4997			633.205			1476.39		897.938		1259.5	3837.95		1549.54					432
YGR059W	SPR3	Verified	898	898		898
YBL052C	SAS3	Verified	1226.37	898.974	94.4988	2821	574	33.5495						282.334				1223.95		2423.37
YER065C	ICL1	Verified	7645.06	899.217	193.427		395	143.747		34034.8			2752.58			899.217
YNR041C	COQ2	Verified	1108.05	900.601	97.0228			59.8371						2571.17		634.381		1166.82
YDR052C	DBF4	Verified	1404.56	902.265	121.661	4342	465	25.107			902.265							1288.42
YIL101C	XBP1	Verified	902.604	902.604	110.868													1610.21								195
YJR079W	YJR079W	Uncharacterized	907	907																						907
YBR250W	SPO23	Verified	907	907		907
YGR146C	ECL1	Verified	909.43	909.43	49.8286													1229.86								589
YBL063W	KIP1	Verified	1623.84	909.591	120.954		494	58.1264			1529.88	5375.57				309.343		1325.18	3841.7							56.9
YHR164C	DNA2	Verified	3700.76	910.957	189.688	17948	483	54.0314			2077.53					303.093		1338.91
YHR189W	PTH1	Verified	1171.03	911.381	82.5325				638.356							2522.34		1184.41								339
YMR251W	GTO3	Verified	880.747	912	32.8817	912			576.783									1153.46
YLR466W	YRF1-4	Verified	1432.14	912.973	111.349	163							634.828	3739.61				1191.12
YOL108C	INO4	Verified	1452.39	914.569	95.5491		4040	364.185			763.62			1065.52				1960								521
YOR034C	AKR2	Verified	950.553	914.745	80.3872			26.8685			273.417			2092.33		1014.49		1481.22								815
YGR057C	LST7	Verified	931.529	915.594	62.9733		1617	277.928										1175.19								656
YDR179C	CSN9	Verified	1215.37	916.981	94.9475			286.195								2741.32		1475.96								358
YCL049C	YCL049C	Uncharacterized	1028.68	919.365	92.7954			9.47957										1182.73				2266.49				656
YIL054W	YIL054W	Uncharacterized	924.806	924.806	61.7501													1328.61								521
YPL156C	PRM4	Verified	935.968	925.19	84.248		1865	28.4911			626.432							1223.95
YDR200C	VPS64	Verified	841.068	926.096	64.4527		1035	334.565			1152.55			926.096		297.252					1765.01					377
YGR101W	PCP1	Verified	927.423	927.423	59.2169											539.086		1315.76
YMR114C	YMR114C	Verified	984.734	928.372	47.9085		1741	408.496	874.611		982.133					639.27		1262.89
YCR019W	MAK32	Verified	4066.97	928.769	188.177		1864	182.288			959.264			898.275	19650.4	847.593
YHL019C	APM2	Verified	1052.91	930	90.6059		930	43.85			506.965					313.261		1203.72			1482.6					2890
YNL254C	RTC4	Verified	898.168	930.801	46.3976		944	155.931						917.602		1242.15		1330.33								799
YML020W	YML020W	Uncharacterized	1639.88	930.855	90.4416		601	159.055			930.855		2136.74	551.5		758.536		1525.15	3809.67	2580.67				4608.51		377
YKL048C	ELM1	Verified	1147.74	931.364	99.7621		859	73.7018			1003.73			1339.05		344.588			3537.55		1875.29					149
YLR211C	ATG38	Verified	1835.71	933.301	96.2103		5064	344.989			903.059		3558.76	802.487		933.301		1243.39
YLL058W	YLL058W	Uncharacterized	1276.37	933.412	88.9762		540	70.4803			600.495			1266.33		3110.89										2070
YNR009W	NRM1	Verified	1270.35	935.865	93.5267		2501	115.902			253.438			510.447				1361.28								2880
YMR271C	URA10	Verified	2603.2	936.043	142.31		10557	71.0955			851.913		3837.89	936.043				1153.46								815
YGL021W	ALK1	Verified	1041.88	936.428	68.4702	1071	385	23.3505			757.648			1315.01		801.855		1791.15								2190
YNL080C	EOS1	Verified	1160.78	937	69.8019		1666	114.848	2406.32		536.456			1774.76		690.072										937
YHR152W	SPO12	Verified	918.755	937	44.2689						1316.05			503.217												937
YLR137W	RKM5	Verified	1071.37	939.909	84.8224		2585	94.3324						506.189		1373.63		1401.04								468
YHR080C	LAM4	Verified	834.926	940	85.5995	1646	940	56.5463			1382.04			150.049
YJL103C	GSM1	Verified	941.772	941.772							941.772
YHR120W	MSH1	Verified	918.962	942.995	69.2777	1047	314	70.0066			838.991			1588.77		313.624		1509.31								1670
YPL002C	SNF8	Verified	865.913	944.382	61.7541			243.931	317.351		990.827			322.268		897.938		1471.58			1643.41					1040
YJL013C	MAD3	Verified	1118.46	944.402	99.4346			12.455			1263.07			699.365		376.441		1189.44								3170
YGR216C	GPI1	Verified	1851.46	944.489	134.353	5500	598	16.863										1290.98
YGR170W	PSD2	Verified	1000.61	944.912	68.9528	284	1259	154.883			2328.73		881.257	1008.57		687.398		1401.04
YKL187C	FAT3	Verified	946	946		946
YKL107W	YKL107W	Uncharacterized	946.762	946.762	44.0556				651.826									1241.7
YLR141W	RRN5	Verified	810.981	946.94	70.1044		1065	16.2831								828.881		1333.76
YMR211W	DML1	Verified	1681.51	947.73	132.829		1255	193.559				6167.2		691.736		577.84		1203.72
YIR002C	MPH1	Verified	1167.88	948.462	91.1273		493	76.5332			553.123			948.462		1394.84		1391.51						3317.72
YJL003W	COX16	Verified	1014.76	949.663	78.0943		2210	126.981					315.836	1536.45				1227.33								672
YDR113C	PDS1	Verified	968.042	950.688	77.9629		1883	87.7914			1169.99			731.388
YGR042W	MTE1	Verified	770.556	951.06	68.9467		1313	32.4712						419.451		951.06		1136.8
YGR077C	PEX8	Verified	956.154	951.06	51.636		1109				276.903			856.482		951.06		1132.64				1828.99				538
YFL003C	MSH4	Verified	951.563	951.563	50.3173		613											1290.13
YOR380W	RDR1	Verified	951.992	951.992	31.7892	738												1165.98
YGR041W	BUD9	Verified	910.279	952	86.6989			10.669			1312.03					297.252								1979.45		952
YDR318W	MCM21	Verified	909.034	952	83.1492			71.4679						356.229		2012.01		1153.46								952
YNL092W	YNL092W	Verified	952	952																						952
YPL219W	PCL8	Verified	1366.62	953.02	87.2802		3772	278.654			1085.54			820.501		741.343		1341.49						2497.44		396
YBL084C	CDC27	Verified	1688.74	955	120.82	2825	955	70.3023			212.365	6650.67		1505.28		787.535		1599.53								593
YPR116W	RRG8	Verified	1035.06	955.03	74.2467			237.987			489.927			395.314		1526.99		1420.13								2140
YJL105W	SET4	Verified	955.138	955.138									955.138
YGL143C	MRF1	Verified	960.447	958.594	78.6928		384	92.1444			180.314			1675.03		1503.19		1881.62			1553.28					414
YPR049C	ATG11	Verified	1299.96	961.271	99.4281		652	90.6651			1515.97	2133.36		647.793		487.9		1270.54	4412.67			1703.16				85.5
YJR052W	RAD7	Verified	1069.4	962.885	60.6889		1934	29.3519	1365.68		592.527			1664.33		962.885										937
YMR042W	ARG80	Verified	1900.98	962.981	151.981		7581	46.9915	222.799					126.358							1725.57	1703.16
YNL162W-A	YNL162W-A	Uncharacterized	3714.77	965.868	162.047		12702	225.331										1535.74								396
YOR386W	PHR1	Verified	931.495	967.152	59.3456		651	88.1883			1571.41			1246.3				1344.07								688
YLR431C	ATG23	Verified	879.059	968.869	67.9207		1594	62.8743								968.869		1231.55								538
YLR377C	FBP1	Verified	970.5	970.5	55.5922	1352																				589
YHR050W	SMF2	Verified	933.363	971.491	49.5792		332							1004.22		938.765		1458.47
YHR067W	HTD2	Verified	1036.09	971.644	85.5183		2168	33.0555										1144.29								799
YGR238C	KEL2	Verified	1075.22	973	91.3907		973	157.05			1455.02			1265.87		219.606									2988.01	468
YLR453C	RIF2	Verified	1486.62	975.573	117.878			14.1008										1362.15	3981.23							589
YMR127C	SAS2	Verified	977.698	977.698	56.2329											588.94		1366.46
YKL011C	CCE1	Verified	909.097	979.296	77.3136		1599	43.5902			164.281		1168.93	1689.12		789.663
YMR064W	AEP1	Verified	1290.1	980.361	96.1332			104.253						386.738		1884.77		1456.72	3404.09							504
YLR091W	GEP5	Verified	1417.9	980.941	105.28			168.466								639.27		1322.61	3541.25
YOR066W	MSA1	Verified	721.065	981	85.514		981	17.046										1165.15
YHR119W	SET1	Verified	1354.19	981	139.885	981	261	135.299	407.144		1019.37			6180.86		1772.39		1258.65								172
YBR153W	RIB7	Verified	925.289	983.643	52.2865			287.619						890.486		1076.8		1446.25
YOR349W	CIN1	Verified	1325.53	983.871	97.9784	3492	310	40.7234										1263.74						2142.69		704
YDL238C	GUD1	Verified	1100.34	984.32	93.5481		2878	15.9981								728.635		1240.01			1460.41					279
YOR205C	GEP3	Verified	1385.45	984.945	137.463		283	26.1548			1032.89			1049.18	5953.61	376.441		1425.35								937
YNL054W	VAC7	Verified	931.17	985.131	75.9549		1453	50.133			1755.69			411.897		985.131
YJL099W	CHS6	Verified	956.775	985.508	43.7205		1058	81.6328			858.571		913.017	1104.38		899.886		1558.71								1180
YIR005W	IST3	Verified	1098.43	986.729	68.8183			394.37			1494.89			148.328		986.729		1308.06			2434.6					922
YPL038W	MET31	Verified	1382.99	987.5	92.124		1454	181.881			498.926			3530.92		2111.21										521
YER060W	FCY21	Verified	1173.96	993.897	48.6968	1814					993.897			713.993
YFL066C	YFL066C	Uncharacterized	994.18	994.18	51.1176								634.828					1353.53
YJR122W	IBA57	Verified	1308.64	994.652	76.2412		2434	103.427		286.083	694.208			994.652	1317.1	813.336								2174.95		2960
YAL020C	ATS1	Verified	809.913	998.196	67.4083		942	10.8682								1054.39		1232.39
YBR125C	PTC4	Verified	1524.18	998.353	85.2727		3785	336.57					773.431	2710.53		848.252		1148.45						2442.21		149
YJL004C	SYS1	Verified	1405.28	998.937	69.9427									998.937		951.06	2611.87				2226.54					238
YOR388C	FDH1	Verified	999.635	999.635	41.338								707.438					1291.83
YLR456W	YLR456W	Uncharacterized	1177.15	1000	93.1714		1000	42.9449								2946.6		1307.2								589
YDR499W	LCD1	Verified	1721.64	1000.41	135.681	7317	435	81.9835			667.922			1793.2		1539.12		1332.9								606
YPL074W	YTA6	Verified	1045.03	1000.55	64.498	328	868	446.563			1957.02			1133.1		1715.11					1653.48					259
YPL075W	GCR1	Verified	1416.66	1002.32	87.9055		661	120.006			837.672			1035.77		968.869		1606.65		3539.51	1454.26			3683.82		259
YJR035W	RAD26	Verified	1017.97	1002.76	89.229		417	87.6656			1978.71			1588.52
YOL025W	LAG2	Verified	1246.36	1004.23	79.5249		850	308.104			723.59			2910.94	1281.9	2542.91		1158.47								195
YAL031C	GIP4	Verified	1121.68	1004.45	80.0091		2686	318.713			968.823			1040.07		189.015		1777.51			1766.29					227
YDR463W	STP1	Verified	2401.49	1004.64	178.811	1320		32.8774	493.477		567.491				12081.9	1004.64										1310
YIL129C	TAO3	Verified	1458.78	1004.93	77.9885	952	624	233.584			2805.44		2992.82	2857.89		1004.93		1452.36								206
YJR040W	GEF1	Verified	1218.32	1005.38	61.8553	595	1804	344.559			1575.94		1005.38	2451.74		751.589
YPR006C	ICL2	Verified	980.138	1005.5	46.8614	508	931						1312.75			430.848		1618.23								1080
YLR094C	GIS3	Verified	866.347	1007.25	66.1933			53.3171			964.497							1397.57								1050
YGL154C	LYS5	Verified	1007.69	1007.69	53.9882													1392.38								623
YEL006W	YEA6	Verified	955.203	1008.33	56.2432		1325	136.108			623.444			828.907				1187.76								1630
YBR302C	COS2	Verified	1137.74	1008.67	99.4448			76.3866						1008.67						2328.16
YDL233W	MFG1	Uncharacterized	975.636	1010	42.2831		547											1369.91								1010
YOR148C	SPP2	Verified	1336.68	1011.93	89.0601		3667	302.619			1274.59			890.397				1133.47								752
YOR097C	YOR097C	Uncharacterized	1104	1012.62	84.9561		2582	32.8158			1012.62			692.575												1200
YIL122W	POG1	Verified	1115.89	1014.34	91.3516		2426	8.87953										1292.68								736
YIR042C	YIR042C	Uncharacterized	1014.42	1014.42	25.1026								834.355					1194.48
YNL293W	MSB3	Verified	1350.99	1014.63	81.1231		2241	251.307	445.057		2780.62			837.297		543.961		1191.96			1852.11				3188.59	178
YFR026C	ULI1	Verified	1016.24	1016.24	41.086													1311.48								721
YIL173W	VTH1	Verified	1310.01	1016.56	90.3868			107.515			1016.56		2526.25	2580.71												319
YMR299C	DYN3	Verified	766.179	1018	68.725		1018	118.66						280.845				1243.39								1170
YOR350C	MNE1	Verified	1441.48	1018.93	97.03	4438	745	45.3353			1858.46					312.971		1176.86			2094.18					861
YLR097C	HRT3	Verified	990.735	1019.07	63.9907		1778	300.01	310.948		726.022			1517.31		1312.12
YBR220C	YBR220C	Uncharacterized	947.74	1020	55.7042		1020	53.1304						1396.16		996.312		1273.09
YAL067C	SEO1	Verified	1021	1021			1021
YMR059W	SEN15	Verified	1628.73	1021.53	114.57			395.592			140.416			535.721		5132.86		2060.47			1507.33
YGL002W	ERP6	Verified	1004.59	1022.13	65.6945		1224	52.8273			351.306		902.188	1022.13		1474.74						2004.92
YFL046W	FMP32	Verified	920.458	1022.6	73.1094		1695	420.882			1395.37			68.4378		1022.6
YBR278W	DPB3	Verified	1468.64	1024	68.8129		1024	250.039			825.766			763.723		1904.68				2580.67	1712.88				3371.97	784
YDR130C	FIN1	Verified	875.828	1026.61	69.2836		865	31.6997						1188.22				1418.4
YKR017C	HEL1	Verified	1082.01	1026.96	87.4184		715	24.1174										1338.91								2250
Q0060	AI3	Verified	1029	1029		1029
YJR135C	MCM22	Verified	1085.22	1030	74.3064			109.134			465.309			443.56		2355.62		1515.47			1677.45					1030
YMR201C	RAD14	Verified	748.08	1030	73.0655		289	35.0025			1187.72							1198.68								1030
YOR390W	FEX1	Verified	1052.66	1031.52	80.5608			60.0049			807.784			2087.6				1255.26
YDR256C	CTA1	Verified	1494.57	1031.82	78.5171								2828.89			1031.82										623
YFL042C	LAM5	Verified	1332.28	1032.22	65.1971	2547	2233	407.85			1257.76			806.675		741.382
YBR237W	PRP5	Verified	1408.27	1033.86	84.689		362	24.1971			1033.86			659.964		235.005	3312.34	1990.59		2382.43	2098.13				3034.51	358
YBL074C	AAR2	Verified	1833.71	1034.39	134.309		597	164.661			1034.39			918.942				1326.9			1464.11					7330
YOR059C	LPL1	Verified	1491.67	1035.05	96.4789		831	67.6348		860.094	111.887			1296.28	4767.11	813.69						1924.55			3034.51	1210
YNL159C	ASI2	Verified	1035.31	1035.31	93.9915				347.222							1723.4
YHR004C	NEM1	Verified	1287.95	1035.58	88.5432	2122	535	33.9503			848.064							1223.1	3554.47			1610.01				377
YGL114W	YGL114W	Uncharacterized	959.371	1036.57	74.6052		1743	21.3371								912.174		1160.97
YDR159W	SAC3	Verified	1007.36	1039	71.637	350	1039	73.8738			2095.61			535.616		1236.68		1677.28			1719.22					339
YGR003W	CUL3	Verified	1124.48	1039.45	92.1444		804	167.902			306.924			1039.45		1262.25		1252.71	3518.13		1596.97					172
YCL063W	VAC17	Verified	1041.27	1041.27	42.411		729											1353.53
YER032W	FIR1	Verified	757.787	1042	85.5258		1042	16.1346						1215.23
YEL020C	PXP1	Verified	1383.04	1042.66	61.9629		1027	330.412			1042.66			935.265		1508.58		1829.42							3007.91
YGR169C	PUS6	Verified	1149.28	1043.65	77.4947			289.436			1544.35			622.708		2597.58		1464.59								377
YJL126W	NIT2	Verified	1005.91	1044.21	60.1704		1517	516.512	199.326		1714.19			747.733		1340.68
YOR301W	RAX1	Verified	1315.83	1045.07	69.7008		820	193.893			2218.71			2301.49		1045.07
YNL295W	MRX6	Uncharacterized	1190.28	1045.27	88.4867			40.9308					2756.26	1045.27		1604.93										504
YJL187C	SWE1	Verified	3033.54	1046.84	150.524	9846	741							194.482				1352.67
YAR035W	YAT1	Verified	965.884	1047	72.7555		1047				226.113					1624.54
YGL064C	MRH4	Verified	1361.13	1048.27	70.0924		2057	341.719	459.94		2248.79		1312.75	2949.05		783.787										736
YAR031W	PRM9	Verified	1124.75	1048.56	70.1247			863.407			2142.87			1233.71												259
YDL114W	YDL114W	Uncharacterized	1050.9	1050.9	27.8429	844												1257.8
YOL110W	SHR5	Verified	1051.07	1051.07	15.3486													1165.15								937
YOR144C	ELG1	Verified	908.645	1053.41	48.2468		1104	88.3166			1002.83			1135.01		793.101		1328.61
YDL119C	HEM25	Verified	1505.02	1053.76	136.758		908	50.3666			69.8863			439.34		1430.75		1199.52							6392.31	1550
YDR503C	LPP1	Verified	885.558	1054.31	79.0136			15.2629			1054.31			1554.6							1503.62					300
YNR066C	YNR066C	Uncharacterized	900.191	1055.34	80.677						108.906		1536.33	1055.34
YNR070W	PDR18	Verified	1055.5	1055.5	66.3897	1551	560
YOR287C	RRP36	Verified	2286.6	1056	91.4707	747	1056	312.323			5044.38		3355.15	4901.67		589.651
YGL236C	MTO1	Verified	1016.05	1056.01	63.1256		1384	110.129			728.023			1724.61		570.342						1579.2
YHL026C	YHL026C	Uncharacterized	1056.65	1056.65	30.3351													1283.31								830
YJL056C	ZAP1	Verified	1344.77	1056.92	103.631	3261		4.23448			747.375							1366.46
YOR113W	AZF1	Verified	1241.62	1057.99	73.8608		2254	42.1798			2240.15			557.729		537.917	2186.76				1558.26					556
YOL112W	MSB4	Verified	981.097	1058.52	72.5568		803	77.3419										1314.05								1730
YPL109C	YPL109C	Uncharacterized	1770.7	1059	101.016		1059	33.2824						4549.9		741.343										2470
YMR204C	INP1	Verified	1073.33	1059.64	73.2767			9.47365			906.71			225.724		1212.58		1540.15		2349.82		1703.16				639
YHR096C	HXT5	Verified	1959.45	1060.27	113.143		5548	36.6627					1379.2	269.172		741.343		3782.3
YDL179W	PCL9	Verified	1060.67	1060.67	33.5555	809												1312.34
YNR055C	HOL1	Verified	1130.92	1062	71.5523		1062	6.88836						764.41				1891.73			1929.59
YGR223C	HSV2	Verified	1078.27	1062.62	77.4622		350	251.124			2725		1062.62	1350.33		654.52		1154.29
YBR235W	VHC1	Verified	1806.57	1063.47	112.145		428	60.1579			759.475			6175.2		903.839		1223.1		3349.5	1553.28
YPL108W	YPL108W	Uncharacterized	1184.25	1065.81	46.9114		765	578.081						874.662		2041.36		1256.95			1589.47
YNL094W	APP1	Verified	1123.68	1067.61	87.5672			69.5142								605.664		1529.56								2290
YNL077W	APJ1	Verified	1110.09	1067.89	81.5731	1940	2396	65.3426			123.489			1067.89		739.052		1467.21						2066.85		125
YHR129C	ARP1	Verified	1855.19	1068	121.281		754	60.9141						269.144		690.072		1382	6839.4	3265.99						1580
YCL038C	ATG22	Verified	1068.17	1068.17	138.464		2114	22.3393
YHR191C	CTF8	Verified	1394.23	1068.31	93.6579		3960	273.198			927.846			753.387		1242.15		1208.77
YLR278C	YLR278C	Uncharacterized	1009.87	1068.5	51.1622		1057	135.246	368.007		1341.74			1011.21		1487.12		1598.64								1080
YLL027W	ISA1	Verified	2221.85	1070	96.4377	1070	1940	99.7932			673.82			631.555		555.651	5329.35	5060.38		4564.1	4390.75					125
YOL009C	MDM12	Verified	939.577	1070	82.812			104.525								1644.21										1070
YJL058C	BIT61	Verified	1220.17	1070.17	75.6418		828	12.6593	2551.87							656.152		1312.34								1960
YGR224W	AZR1	Verified	1070.65	1070.65	18.5784	930												1211.3
YPL279C	FEX2	Verified	1073.8	1073.8	133.519			60.0049						2087.6
YOL089C	HAL9	Verified	1094.54	1074.17	76.144		486	89.4296			1074.17			1199.34		575.706	2372.73	1587.08						2228.37		238
YOL084W	PHM7	Verified	1035.94	1076.37	55.4399		788				930.983	1221.76		111.938				1365.59				1797.36
YOL083W	ATG34	Verified	1143.45	1076.8	77.9666		2560	302.785			481.574					1076.8		1296.1
Q0085	ATP6	Verified	1076.8	1076.8												1076.8
YOR328W	PDR10	Verified	1078.03	1078.03	109.273	1911					245.06
YHR202W	YHR202W	Uncharacterized	1066.8	1079.22	64.9556		2139	16.4686			861.995			1079.22		532.417		1257.8			1580.72
YML002W	YML002W	Uncharacterized	1079.7	1079.7	13.7142	975												1184.41
YBR085W	AAC3	Verified	6195.82	1080	145.56			371.348			16562.7		798.343	181.367	21762.2	2614.75										1080
YCR038C	BUD5	Verified	1080.38	1080.38	134.778						50.7505															2110
YLL007C	LMO1	Verified	1189.43	1080.62	65.5112		1718	236.647			803.393			2637.75		758.536		1357.84			1517.25					486
YLL004W	ORC3	Verified	1396.16	1081	70.302		1081	322.488			1069.28			1538.87		2969.14
YHR204W	MNL1	Verified	944.189	1082.39	77.0721			48.1448								1508.77						1563.84				656
YGR127W	YGR127W	Uncharacterized	1791.84	1082.87	109.715		6115	569.381			1690.96		913.017	484.521		1082.87		1687.16
YCR061W	YCR061W	Uncharacterized	1083.13	1083.13	34.9686											815.309		1350.95
YGL175C	SAE2	Verified	858.781	1084	63.3535		1138	50.7659										1216.36								1030
YDR349C	YPS7	Verified	1022.75	1084.91	76.3359		1340	205.836			202.618					829.815		1725.9			2103.39	1625.46				149
YBR066C	NRG2	Verified	1086.48	1086.48	49.7854													1468.96								704
YNL023C	FAP1	Verified	1131.67	1091	67.6101		1593	361.007			2119.14			1712.62		415.26										589
YKL168C	KKQ8	Verified	1268.02	1091	50.5542		1091	2099.43			1903.18			1010.82		219.606		1571.11								981
YMR198W	CIK1	Verified	979.456	1091.45	81.9003		1625	25.4823			809.532			1944.46				1373.36								98.9
YEL059C-A	SOM1	Verified	2920.88	1093.84	145.273		11219	244.696	3515.92					643.123							1544.57					358
YBR223C	TDP1	Verified	1797.36	1095	98.4731		1095	76.3774						1001.62	4683.78											2130
YNL273W	TOF1	Verified	1134.64	1096	63.566	180	1096	75.6533			1779.33			2023.09		911.551	2050.65	1143.46								952
YER013W	PRP22	Verified	1405.8	1098.97	99.562	4613	590	231.503			1483.37			1290.95		401.051		1729.51								907
YBR131W	CCZ1	Verified	1889.85	1101.41	117.379	5896	322	48.2775						600.837							1601.98					2870
YDL248W	COS7	Verified	1186.57	1103.45	104.866	2463	2044	76.3866						162.897
YAL009W	SPO7	Verified	953.221	1103.82	54.4412		1350	255.234										1346.65								861
YCL039W	GID7	Verified	1361.16	1104.11	69.9384		3616	224.739	609.47	804.303	2070.4			1008.22		950.362		1583.53			1544.57					1200
YMR048W	CSM3	Verified	3189.17	1105.1	116.357		993	257.372			1780.15	953.037		861.867		489.716		1217.2		9844.85			4642.14	10015.2	6857.42	358
YGL198W	YIP4	Verified	1526.8	1105.21	89.3034						416.639			1399.99		810.426						3480.14
YFR048W	RMD8	Verified	1400.22	1105.7	83.3522		1730	52.3595			713.967			642.038		2191.5					1497.43				3718.51	656
YMR306W	FKS3	Verified	1106	1106			1106
YJL047C	RTT101	Verified	1021.16	1106.71	57.7763	299	671	164.969			1123.18		822.521	1918.05		1106.71		1576.43			1508.57
YCR092C	MSH3	Verified	1459.32	1107.67	82.0444	880	467	229.935			1557.71	3455.69		3447.21		1107.67		1252.71								736
YBL008W	HIR1	Verified	1248.18	1108.87	65.7691		1328	86.0964			2456.87		2403.24	1064.28		647.47		1153.46								846
YMR294W	JNM1	Verified	1049.68	1110	63.7022		1110	94.3974			1964.43			906.908				1172.68
YGL124C	MON1	Verified	1041.31	1110.04	55.2672		1423	193.986			1674.33			1110.04		805.215
YAR003W	SWD1	Verified	1369.14	1113.85	72.7186			185.397			1270.59			386.818		957.104		1652.18		2692.68				2901.35		907
YOL002C	IZH2	Verified	1193.17	1117.41	74.5647		1621	95.9308			574.817		2360.86	613.815								1892.59
YLR072W	LAM6	Verified	1438.77	1117.64	78.1462		1006	168.766			3165.65			2390.94		1229.27										672
YER180C-A	SLO1	Verified	7076.47	1122.03	137.577		23127	1122.03			438.972			1103.56		9590.77
YAL011W	SWC3	Verified	1118.74	1122.28	67.159		655	114.614			1122.28			393.43		845.277		1238.31			1690.09			2629.65		1380
YLL055W	YCT1	Verified	1122.29	1122.29	12.3853		1024											1220.57
YKR005C	YKR005C	Uncharacterized	1125.99	1125.99														1125.99
YML122C	YML122C	Uncharacterized	1125.99	1125.99														1125.99
YER005W	YND1	Verified	1277.61	1126.05	73.6273		930	111.45			1322.1			633.65		2702.67				2500.29	1570.73					450
YOR177C	MPC54	Verified	2803.73	1126.82	112.955							6456.55				827.827		1126.82
YBR175W	SWD3	Verified	1237.54	1127.44	84.6139		3201	73.7009			1118.21			747.233		1136.67		1148.45
YBL071C	YBL071C	Uncharacterized	1127.65	1127.65														1127.65
YDL206W	YDL206W	Uncharacterized	1011.22	1127.65	20.4894	772	1134											1127.65
YOR073W	SGO1	Verified	1128	1128		1128
YHL043W	ECM34	Verified	1128.48	1128.48														1128.48
YCL008C	STP22	Verified	1265.39	1128.5	64.4705		897	159.634				2700.81	846.028	618.104		1520.51						2021.08				1360
YCR040W	MATALPHA1	Verified	1129.31	1129.31														1129.31
YCR045C	RRT12	Verified	1129.31	1129.31														1129.31
YER137C	YER137C	Uncharacterized	980.938	1129.97	78.3449		1780	168.655			194.448			1129.97				1631.61
YDL218W	YDL218W	Uncharacterized	1130.14	1130.14														1130.14
YNL196C	SLZ1	Verified	1130.14	1130.14														1130.14
YMR218C	TRS130	Verified	1573.94	1131.38	95.4868	1900	519	183.869			762.846	4914.64		2044.76		367.926					1499.91			3114.49		432
YLR323C	CWC24	Verified	1173.72	1131.45	35.5804		1121	473.513			1391.59			1857.39		1131.45		1245.08								996
YGL134W	PCL10	Verified	1383.15	1131.45	94.5382		637	28.199								1131.45		1336.34		3370.46				2961.59		217
YER106W	MAM1	Verified	1131.81	1131.81														1131.81
YDR013W	PSF1	Verified	1655.24	1131.81	86.7754	2490	793	198.747			1039.57			4503.59				1131.81								1430
YEL035C	UTR5	Uncharacterized	1132.64	1132.64														1132.64
YGL219C	MDM34	Verified	1292.71	1132.82	89.0602		804	31.1331			356.597			295.632			2081.14	1715.07	3732.74		1461.65			2072.11		377
YIR030C	DCG1	Verified	1010.8	1133.47	89.381		2334	64.9014	221.641		172.295			1203.74		1945.56		1133.47
YGR131W	FHN1	Verified	1133.47	1133.47														1133.47
YGR199W	PMT6	Verified	1523.6	1133.73	71.1895		669	507.181			2780.44		721.106	1316.4	3477.73	951.06						1765.85
YDR414C	ERD1	Verified	1134.3	1134.3														1134.3
YLR266C	PDR8	Verified	1134.3	1134.3														1134.3
YAL058W	CNE1	Verified	1571.1	1135.13	86.9942		801	374.808	402.728		2150.38			1221.07		1044.8		1135.13				2249.96				4760
YIL164C	NIT1	Verified	1135.13	1135.13														1135.13
YEL057C	SDD1	Verified	1135.13	1135.13														1135.13
YGR050C	YGR050C	Uncharacterized	1135.96	1135.96														1135.96
YHR159W	TDA11	Uncharacterized	1262.59	1136	86.4236		1136	34.6316			1759.56		1305.17	524.036		457.073			3570.73					2072.11		504
YBL013W	FMT1	Verified	1158.31	1136.8	39.7578	1522								450.187		1612.55		1136.8								1070
YBR019C	GAL10	Verified	1136.8	1136.8														1136.8
YIL089W	YIL089W	Verified	1136.8	1136.8														1136.8
YBL088C	TEL1	Verified	1509.55	1136.8	120.96	4444	40	6.7829			1920.16							1136.8
YNL339C	YRF1-6	Verified	1369.93	1136.8	102.093			106.969			1231.46		634.828	3739.61				1136.8
YLR108C	YLR108C	Verified	1843.26	1137	86.4945		1137	142.542	687.74		917.737			2651.4			4736.37			2984.18	3143.35					189
YER180C	ISC10	Verified	1137.63	1137.63														1137.63
YNR072W	HXT17	Verified	1139.29	1139.29														1139.29
YPR011C	YPR011C	Verified	2519.18	1139.29	100.404		4798	102.212		5676.04						880.333		1139.29
YDL246C	SOR2	Verified	1139.29	1139.29														1139.29
YPL003W	ULA1	Verified	1173.63	1139.84	61.8484		1140	490.433			1139.84			725.295		2372.6
YLL002W	RTT109	Verified	1533.86	1140	89.0452	1803	270							283.263		758.536			4069.82	2412.43						1140
YBR299W	MAL32	Verified	1727.73	1140.12	119.923			13.0564										1140.12								4030
YPR078C	YPR078C	Uncharacterized	1140.12	1140.12														1140.12
YDL059C	RAD59	Verified	1868.29	1140.26	130.067		6691	106.264						917.513		1663.93		1363.01								468
YNR060W	FRE4	Verified	1140.96	1140.96														1140.96
YEL076C	YEL076C	Uncharacterized	1140.96	1140.96														1140.96
YMR085W	YMR085W	Uncharacterized	1140.96	1140.96														1140.96
YCR048W	ARE1	Verified	1529.32	1141	63.6385		1141	452.293			2153.26	1099.16	3702.26	933.778		875.781		1449.74				1956.62
YML119W	YML119W	Uncharacterized	1277.94	1141.11	92.6724		3283	143.248			120.598			1224.27		1057.96		1838.56
YCR008W	SAT4	Verified	1202.94	1141.79	58.2163		2314	95.6164			1703.95			1351.1		784.159		1141.79								1030
YOL026C	MIM1	Verified	1141.95	1141.95	17.005									1279.27		1004.64
YMR138W	CIN4	Verified	1264.18	1142.62	88.7205			124.027										1142.62			1598.22				2988.01	468
YOR269W	PAC1	Verified	2046.02	1142.62	113.062			114.272			434.35			111.324		2138.42		1142.62	6037.32	4343.81
YNL289W	PCL1	Verified	1155.9	1142.62	48.158							1719.08						1142.62								606
YBR050C	REG2	Verified	1142.62	1142.62														1142.62
YMR279C	YMR279C	Verified	1144.29	1144.29														1144.29
YPL186C	UIP4	Verified	5722.37	1145.12	190.799		30302	344.634			361.397		3036.64	1086.57	3780.24			1145.12
YFL061W	DDI2	Verified	1145.95	1145.95														1145.95
YJL046W	AIM22	Verified	1366.1	1147.13	64.1822		2323	180.884			2471.98			926.471		1072		1222.26
YNL314W	DAL82	Verified	1489.58	1147.62	109.596		3266	55.1173										1147.62
YOR030W	DFG16	Verified	1147.62	1147.62														1147.62
YOR363C	PIP2	Verified	1191.1	1147.73	83.7834		1142	13.8013										1153.46						2455.16
YJL027C	YJL027C	Uncharacterized	1148.45	1148.45														1148.45
YHL006C	SHU1	Verified	1148.45	1148.45														1148.45
YDR109C	YDR109C	Uncharacterized	1134.84	1149.29	64.5818		2314	119.372	870.896		1747.51			1200.94		541.849		1149.29
YKL208W	CBT1	Verified	1149.78	1149.78												1149.78
YOL159C	CSS3	Verified	1365.13	1149.78	28.0984		1808									1149.78		1137.63
YBL097W	BRN1	Verified	1411.73	1150	55.543		1150	206.466			2268.66			1106.37		1017.89		1720.48			1841.82			2689.89		704
YBR228W	SLX1	Verified	1150.12	1150.12														1150.12
YBR083W	TEC1	Verified	2772.89	1151.4	123.96		895	46.8445			1151.4		8310.49	7180.39				1296.1								530
YOL082W	ATG19	Verified	977.488	1151.79	43.6416		1278	191.489			1421.05			789.623		760.469		1151.79								1250
YLR464W	YLR464W	Uncharacterized	1151.79	1151.79														1151.79
YGR006W	PRP18	Verified	1109.85	1151.79	62.4067			220.125			842.052			1203.14		2132.16		1151.79
YBR076W	ECM8	Verified	1152.62	1152.62														1152.62
YAL037W	YAL037W	Uncharacterized	1152.62	1152.62														1152.62
YML051W	GAL80	Verified	1317.22	1152.86	70.9735			24.2629								1023.27		1282.46		2347.11				2442.21		784
YDL203C	ACK1	Verified	1284.31	1152.94	86.282		1715	390.919	235.264		1152.94			1490.36		875.047					1930.89				3669.46	98.9
YDR057W	YOS9	Verified	1506.92	1153	69.4984		1153	162.328			1022.78		1833.1	899.854	3410.93	2066.44
YDR144C	MKC7	Verified	2436.1	1153.01	106.279		1215	1053.17			5333.13	7637.34		1057.33		1091.01						1563.84				538
YDL035C	GPR1	Verified	2535.46	1153.35	156.178	10565	1156	23.4933			1099.54			1150.71				1218.04
YOL138C	RTC1	Verified	1013.98	1153.46	66.7034	1688	474	146.378			1784.93			1472.9		143.681		1153.46				1656.45				606
YAL015C	NTG1	Verified	1186.06	1153.7	64.8387		2374	173.85			726.079			848.927		1535.04		1458.47
YLR318W	EST2	Verified	1154.29	1154.29														1154.29
YDR270W	CCC2	Verified	935.027	1155	80.7226		1155	2.56665								281.595		1595.08			1640.89
YPR064W	YPR064W	Uncharacterized	1155.13	1155.13														1155.13
YNR057C	BIO4	Verified	2862.01	1155.96	116.99		5567	34.3249			244.498		7308.25					1155.96
YGR052W	FMP48	Uncharacterized	1280.69	1155.96	78.852													1155.96		2347.11						339
YLL066C	YLL066C	Uncharacterized	1843.47	1155.96	90.1917								634.828	3739.61				1155.96
YGL250W	RMR1	Verified	1930.51	1155.96	95.4483		5279	25.6475						700.976		1004.64		1155.96		3527.36						1820
YPR083W	MDM36	Verified	944.075	1156	65.5658		1156	37.3302			1235.13					555.651		1461.96			1748.45					414
YIL017C	VID28	Verified	1741.77	1156.19	105.992		2170	333.037	433.524		173.088			918.524	5936.84	1156.19		1346.65						3208.07
YOL015W	IRC10	Verified	1156.4	1156.4	0.660769	1151												1161.81
YPR065W	ROX1	Verified	1439.96	1156.62	95.0766		1509	26.122						804.242					3508.2		2554.23					238
YPR199C	ARR1	Verified	1156.8	1156.8														1156.8
YDR004W	RAD57	Verified	2180.02	1156.8	119.666													1156.8	5145.28							238
YEL008W	YEL008W	Uncharacterized	1157.63	1157.63														1157.63
YBR044C	TCM62	Verified	1057.92	1157.63	72.2773		815	74.6677		118.851	1923.17			1904.45		1411.66		1157.63
YKL159C	RCN1	Verified	1728.75	1158.07	92.6269		2043	962.615		838.34	2154.42			573.79		5383.3		1353.53								521
YLR312C	ATG39	Verified	844.349	1159.3	82.5175		1328	45.7457										1159.3
YMR262W	YMR262W	Uncharacterized	1218.39	1160.14	87.7912		1783	52.8262						1032.93	3206.29	1168.58		1160.14								125
YCR065W	HCM1	Verified	1534.05	1160.3	97.2468		1327	17.1423			993.601			100.108		489.716	2399.76		4315.56		1721.76			3617.85		358
YHR139C	SPS100	Verified	1897.49	1160.8	95.2302		3395	468.374					4832.52		367.428	1168.15		1153.46
YER066W	RRT13	Uncharacterized	1161.81	1161.81														1161.81
YDR107C	TMN2	Verified	1513.36	1161.81	83.3101		2532	73.3737			3654.27		1024.8			334.124		1161.81				1813.17
YHR171W	ATG7	Verified	1061.4	1162	52.9871		1162	200.06	483.67	1974.86	1555.89		1470.02	798.639		723.016		1184.41
YMR273C	ZDS1	Verified	1266.66	1162.2	81.5007		930	94.1771			2213.69			1162.2		282.477		1683.57			1498.67				3256.2	279
YML011C	RAD33	Verified	1952.41	1162.41	99.9793	3054	5421	264.206			1244.82			650.426												1080
YFL059W	SNZ3	Verified	1778.18	1162.52	112.331			173.032			1705.26		4614.67	619.782
YKR054C	DYN1	Verified	1270.98	1163.06	95.6725	3784	131	39.7251			963.105		2369.4			282.688	2100.48	1363.01			1481.37					195
YGL051W	MST27	Verified	1163.48	1163.48														1163.48
YML050W	AIM32	Verified	1187.22	1163.8	85.7963		1943	20.0589		2453.5			379.171	457.872		1869.72
YHL023C	NPR3	Verified	1396.55	1164.57	113.02	4781	1342	59.8725			1164.57			758.794		281.595		1388.05
YJR110W	YMR1	Verified	1606.03	1164.78	71.5865		1134	148.518			880.544			1164.78		143.681		1653.97	3451.83		1930.89			2801.56	3276.55	1080
YER167W	BCK2	Verified	951.571	1164.86	62.3839		772	10.7644			1537.99			1164.86				1272.24
YER170W	ADK2	Verified	1257.29	1165.15	48.8988	1837								634.767		1945.56		1165.15								704
YDR018C	YDR018C	Uncharacterized	1165.15	1165.15														1165.15
YDL089W	NUR1	Verified	1838.87	1165.48	72.6936	1095	3315	353.566			2103.57			1165.48		758.536			3809.15	3343.51						606
YFR012W	DCV1	Verified	1165.98	1165.98														1165.98
YKL044W	MMO1	Verified	1165.98	1165.98														1165.98
YHR155W	LAM1	Verified	1058.7	1166.74	43.399	1202	644	536.64			1844.04			1373.64		535.826		1163.48								1170
YHR054C	YHR054C	Uncharacterized	1166.82	1166.82														1166.82
YAR023C	YAR023C	Uncharacterized	1167.66	1167.66														1167.66
YMR213W	CEF1	Verified	1101.45	1168.23	51.994		1311	212.096			1944.4			1168.23		749.394		1541.03								784
YHR134W	WSS1	Verified	1168.49	1168.49														1168.49
YIL002C	INP51	Verified	1241.65	1169.05	82.9707		1318	170.716			1020.1	3023.98	1618.58	448.883		389.062		1586.2						2742.12		98.9
YPL155C	KIP2	Verified	1625.08	1169.81	129.04	7203	674	35.1548			123.287			377.944		1694.79		1665.62			1673.66			2147.37		656
YLR117C	CLF1	Verified	1202.67	1169.94	55.4169		1468	75.2561			935.548			1128.57		707.111		1211.3			1955.55					2140
YAL027W	SAW1	Verified	1586.02	1170	83.8018		3893	460.815								1279.46		1126.82								1170
YDL033C	SLM3	Verified	991.495	1170.19	71.78			50.94								830.379		1574.66								1510
YER011W	TIR1	Verified	1170.9	1170.9	66.1751																	1718.79				623
YLR193C	UPS1	Verified	1156.5	1171.83	86.6284			115.372			43.1041					2244.87		1639.65			2191.98					704
YGR230W	BNS1	Verified	1171.84	1171.84														1171.84
YEL077C	YEL077C	Uncharacterized	1848.76	1171.84	89.7571								634.828	3739.61				1171.84
YNL279W	PRM1	Verified	1172.68	1172.68														1172.68
YNR065C	YNR065C	Uncharacterized	1431.51	1175.27	69.2815	593							2526.25	1175.27
YBL049W	MOH1	Verified	2081.12	1176.03	126.735		5052	15.3263										1176.03
YIL147C	SLN1	Verified	1105.43	1176.3	59.476		968	52.6671			1981.06			1575		551.204		1384.59			1674.92					656
YNL093W	YPT53	Verified	1877.31	1176.5	94.9805	1523	4493	663.259																		830
YHL044W	YHL044W	Uncharacterized	1176.86	1176.86														1176.86
YER115C	SPR6	Verified	1176.86	1176.86														1176.86
YHR194W	MDM31	Verified	1088.9	1177.7	15.9314	889												1177.7								1200
YGL081W	YGL081W	Uncharacterized	1178.54	1178.54														1178.54
YHR157W	REC104	Verified	1178.54	1178.54														1178.54
YDR146C	SWI5	Verified	1815.33	1178.72	118.456		1096	18.2146			1860.73			1261.45		297.252				2569.54				6731.44		688
YDR114C	YDR114C	Uncharacterized	1179.38	1179.38														1179.38
YIL056W	VHR1	Verified	1188.33	1179.88	68.9945	1632	1732	40.9378			1380.24			895.038		979.527					2567.89					279
YFR020W	CSS2	Verified	1180.21	1180.21														1180.21
YER015W	FAA2	Verified	1551.17	1180.21	120.133	5508	1528	94.4962								360.486		1180.21				1828.99				358
YDL169C	UGX2	Verified	1180.21	1180.21														1180.21
YIR032C	DAL3	Verified	1377.69	1180.94	80.6406		2929	72.2821	1442.38		493.453			919.49		2409.52
YGL186C	TPN1	Verified	1287.27	1181	78.9001		1181	28.904			1036.31					250.471	2931.95	1441.89			2140.33
YNL217W	YNL217W	Uncharacterized	1400.22	1181.46	78.755			339.915			877.567			1485.35		2898.04
YLR085C	ARP6	Verified	2437.9	1181.72	178.54		782	150.246		1181.72	895.507		1661.23			1880.65		1208.77	13942.9							238
YIL132C	CSM2	Verified	1687.53	1181.89	94.0976													1181.89	3466.71							414
YLR070C	XYL2	Verified	1181.89	1181.89														1181.89
YCR097W	HMRA1	Verified	1182.73	1182.73														1182.73
YGR236C	SPG1	Verified	1182.73	1182.73														1182.73
YDR423C	CAD1	Verified	1553.9	1183.02	83.992		1658	52.5506			720.123			468.146		522.576				3698.53	1645.92			2961.59	3188.59	623
YML003W	YML003W	Uncharacterized	1183.57	1183.57														1183.57
YDL057W	YDL057W	Uncharacterized	1072.49	1184.32	69.88		1211	56.8948								1864.45		1157.63
YOR378W	AMF1	Verified	1184.41	1184.41														1184.41
YNR071C	YNR071C	Uncharacterized	1184.41	1184.41														1184.41
YPL077C	YPL077C	Uncharacterized	1350.79	1184.41	27.2706		1773									1094.97		1184.41
YAL047C	SPC72	Verified	1083.45	1184.9	52.5967		1177	219.003			2007.72			1297.4		616.175		1192.8			1518.48					639
YMR160W	YMR160W	Verified	1227.61	1185.32	68.6028	3181	915				1185.32		570.325	707.611		1201.77		1541.92			1466.57					279
YGR056W	RSC1	Verified	1414.84	1185.6	69.6108		1064	506.396			2695.2			1185.6		2772.66		1421								259
YNR031C	SSK2	Verified	1207.02	1186	57.6562		1186	87.4834			1696.85		1160.43	817.439		639.542	2075.07	1898.17			1558.26			1940.93		217
YLR081W	GAL2	Verified	1662.01	1186.08	97.9339			325.353					3474.6					1186.08
YFL012W	YFL012W	Uncharacterized	1186.08	1186.08														1186.08
YDL085W	NDE2	Verified	1334.63	1186.08	45.2384	1862	2028						1024.8			572.269		1186.08
YOL034W	SMC5	Verified	1558.38	1186.35	75.4975		1131	89.5144			2582.01			2856.8		437.712		1241.7						3236.35		892
YPR151C	SUE1	Verified	1186.92	1186.92														1186.92
YKR091W	SRL3	Verified	1282.92	1187.08	85.6769		2718	39.5237						1204.82				1169.33
YGL263W	COS12	Verified	1187.76	1187.76														1187.76
YIR014W	YIR014W	Uncharacterized	3353.21	1188.13	152.412			59.1462					10977.5			1149.78		1226.48
YER124C	DSE1	Verified	1736.39	1188.93	87.04			5.15086			1188.93					862.78			3545.08							3080
YOL073C	DSC2	Verified	1189.23	1189.23	38.5567		865									1513.45
YGR066C	YGR066C	Uncharacterized	1190.28	1190.28														1190.28
YOL159C-A	YOL159C-A	Verified	2893.58	1190.28	118.631		8205	473.41								4474.21		1190.28								125
YJL223C	PAU1	Verified	1190.28	1190.28														1190.28
YFR023W	PES4	Verified	2105.76	1190.28	118.972	4940	187											1190.28
YBL020W	RFT1	Verified	1156.87	1190.62	85.0143		2024	222.245								392.455						1988.79
YFL009W	CDC4	Verified	1162.14	1191.38	58.8613		863	34.7471			1978.35			1249.3		1713.96		1133.47
YPL147W	PXA1	Verified	1192	1192		1192
YJL025W	RRN7	Verified	1192	1192	94.2018	1986																				398
YOR114W	YOR114W	Uncharacterized	1192.8	1192.8														1192.8
YMR325W	PAU19	Verified	1192.8	1192.8														1192.8
YJR159W	SOR1	Verified	1192.8	1192.8														1192.8
YFL058W	THI5	Verified	1192.8	1192.8														1192.8
YJR138W	IML1	Verified	1116.45	1195	69.7263		1195	198.705			2003.26			2018.06		570.328					1550.79					279
YCR037C	PHO87	Verified	1532.85	1196.92	94.0355	417	830	377.033			4708.95			1979.41				1882.54				1563.84				504
YJR154W	YJR154W	Uncharacterized	1104.62	1197	49.5603								516.853					1197								1600
YDR207C	UME6	Verified	1122.05	1199.35	68.955		1753	108.812	471.188		2142.78	1126.23		393.845		1272.48		1784.78			1950.35					217
YBL029W	YBL029W	Uncharacterized	1199.38	1199.38	58.0447											707.111		1691.66
YIL096C	BMT5	Verified	1599.01	1199.77	46.1286		1087	729.067			1064.25			1105.64		1199.77	2216.62	2195.93			1832.83					2960
YMR126C	DLT1	Uncharacterized	1200	1200																						1200
YOR279C	RFM1	Verified	8009.78	1200.57	206.279		734							760.834	41709.2			1540.15		2453.51						861
YLR145W	RMP1	Verified	3124.72	1201.2	153.097			40.3872							11551.3	2274.71		1201.2								556
YMR234W	RNH1	Verified	1027.57	1201.2	72.8866		2072	48.2011			745.296			1422.47		1554.83		1201.2								149
YGL034C	YGL034C	Uncharacterized	1202.04	1202.04														1202.04
YGL262W	YGL262W	Uncharacterized	1202.04	1202.04														1202.04
YLR233C	EST1	Verified	1134.79	1202.88	91.0096			69.6602						2131.83				1202.88
YGL243W	TAD1	Verified	1146.25	1203.72	52.4175		864	246.679	712.413		1250.02			1780.88		1966.07		1203.72
YOR064C	YNG1	Verified	2237.44	1203.72	119.149		6780	40.7304								2301.74		1203.72								861
YNL042W	BOP3	Verified	1207.12	1203.77	14.9238						1203.77			1028.67				1388.92
YHL047C	ARN2	Verified	1204	1204			1204
YLR316C	TAD3	Verified	1210.4	1204.52	46.3399		1538	395.405						1078.71		2027.95		1330.33								892
YER135C	YER135C	Uncharacterized	1205.41	1205.41														1205.41
YDR255C	RMD5	Verified	1232.79	1206.25	72.5402		2690	369.168			1624.43		396.495	1902.39		440.834		1206.25
YDR108W	TRS85	Verified	1822.03	1206.39	131.636		1101	200.293		332.807	641.751			382.679		1206.39		1823.95			1796.94	1610.01		2186.52		8760
YNL334C	SNO2	Verified	1436.51	1207.09	107.525	3083		19.4468										1207.09
YIL146C	ATG32	Verified	1389.5	1207.42	93.2242	3137	1217	6.17765										1197.84
YDR209C	YDR209C	Uncharacterized	1207.93	1207.93														1207.93
YGL215W	CLG1	Verified	1208.77	1208.77														1208.77
YGR113W	DAM1	Verified	2647.46	1209	119.409		1209	46.4861			1803.77	5437.91		692.315	8583.86	758.854
YGL142C	GPI10	Verified	1306.79	1209.44	48.4829		1193	2167.6						1225.87		640.662
YJR136C	TTI2	Verified	1233.2	1210.53	72.8763		505	54.447						752.245		951.06		1545.45			1579.47				3007.91	1470
YPL083C	SEN54	Verified	1200.42	1210.98	64.6073		983	138.66			557.172	1938.4				1438.97	2374				1642.15					531
YBL111C	YBL111C	Verified	1909.35	1211.3	87.88								634.828	3739.61				1211.3						3681.99		279
YCL026C-A	FRM2	Verified	1213.83	1213.83														1213.83
YCR085W	YCR085W	Uncharacterized	1213.83	1213.83														1213.83
YPL054W	LEE1	Verified	1214.67	1214.67														1214.67
YJR107W	LIH1	Uncharacterized	1214.67	1214.67														1214.67
YER116C	SLX8	Verified	1214.67	1214.67														1214.67
YGL183C	MND1	Verified	1216.36	1216.36														1216.36
YLL053C	YLL053C	Uncharacterized	1216.36	1216.36														1216.36
YMR177W	MMT1	Verified	1829.14	1216.85	129.084		302	144.68								915.594		1518.11			1604.49					6490
YDR415C	YDR415C	Uncharacterized	1170.03	1217.2	70.9649		1787	31.5644								712.141		1217.2				2102.24
YHL035C	VMR1	Verified	1559.2	1217.2	104.637	4053	93							2197.78		235.005		1217.2
YAL064W-B	YAL064W-B	Uncharacterized	1218.89	1218.89														1218.89
YGR153W	YGR153W	Uncharacterized	1218.89	1218.89														1218.89
YGL059W	PKP2	Verified	1256.61	1219.04	94.2973		1546	92.5374		1220.71	166.091			1217.37					3796.93		1563.25					450
YHL049C	YHL049C	Uncharacterized	1220.57	1220.57														1220.57
YER104W	RTT105	Verified	2016.21	1220.57	112.216										4569.05			1220.57								259
YIL072W	HOP1	Verified	1222.26	1222.26														1222.26
YJR127C	RSF2	Verified	929.263	1222.26	81.7233		1424	12.4912			1744.61					242.952		1222.26
YKL089W	MIF2	Verified	1504.02	1223.95	75.4183		1202	64.7645						1637.39				1223.95						2746.48	3188.59	465
YDR222W	YDR222W	Uncharacterized	2123.78	1224.79	101.575		859	88.4584			1165.31		7095.73	3961.34		1482.15		1224.79						2227.23		1010
YAR019C	CDC15	Verified	1272.78	1225.45	79.5854	2849	1506	95.0418			276.718			791.351		975.822		1475.09			1576.97			2943.79		238
YLR161W	YLR161W	Uncharacterized	1225.64	1225.64														1225.64
YBR240C	THI2	Verified	1225.64	1225.64														1225.64
YJL205C	NCE101	Verified	1225.83	1225.83	35.8208			915.34					1536.33
YML077W	BET5	Verified	1162.85	1226.12	68.524			143.653						1226.12	690.635	1520.42						2233.44
YBR271W	EFM2	Verified	1830.37	1226.22	102.892			424.844			1008.47			1226.22		5703.72		1618.23		2614.13						217
YDL170W	UGA3	Verified	1163.68	1226.46	47.2649		1917	64.6462	767.513					1240.77		1392.62		1212.14			1514.77					1200
YMR063W	RIM9	Verified	1226.67	1226.67	3.88213		1193											1260.35
YJR094C	IME1	Verified	1227.33	1227.33														1227.33
YPL264C	YPL264C	Uncharacterized	1228.17	1228.17														1228.17
YLR239C	LIP2	Verified	1360.05	1228.5	54.1442		1257	191.019						2076.87		2236.75		1198.68								1200
YJL077C	ICS3	Verified	1229.01	1229.01														1229.01
YML100W-A	YML100W-A	Uncharacterized	1229.01	1229.01														1229.01
YML037C	YML037C	Uncharacterized	1570.04	1229.02	111.673	5640	1794	113.052			1147.42			168.233				1310.62			1571.98					815
YIL139C	REV7	Verified	1229.86	1229.86														1229.86
YJR098C	YJR098C	Uncharacterized	1071.92	1230	53.2992	1658	618	76.4495			1377.48			940.278							1603.23					1230
YER129W	SAK1	Verified	1130.11	1231.55	60.4455		1572	187.387			1113			2079.46		268.169		1350.09				1718.79				752
YGL168W	HUR1	Verified	1232.39	1232.39														1232.39
YPR001W	CIT3	Verified	1232.97	1232.97	13.4294								1350.06			1115.89
YOR026W	BUB3	Verified	1283.78	1233.1	67.2665		1463	122.831			1092.85			1047.71		639.27		1373.36							3101.25	1430
YOR140W	SFL1	Verified	1726.85	1233.9	73.0275		2782	21.6255	531.018		905.019			446.534		1233.9	3012.11	2856.11	3721.62		2445.43					1040
YPR198W	SGE1	Verified	1072.51	1234.08	92.6042	1975		8.43928										1234.08
YLR260W	LCB5	Verified	1325.96	1235	50.0663		1235	193.219			2280.88			1037.35		1103.28						1671.99				1760
YOR268C	YOR268C	Uncharacterized	1235.78	1235.78														1235.78
YDL197C	ASF2	Verified	1239.5	1239.5	76.501	569																				1910
YPR152C	URN1	Verified	1420.98	1240.51	69.8402		880	227.583			692.899			1171.03		496.154	2607.42	1782.06	3450.67		1591.97					1310
YLR121C	YPS3	Verified	1090.35	1240.58	81.4213		1780	46.2121			59.7787					1026.89					1454.26			2174.95
YGL230C	YGL230C	Uncharacterized	1240.85	1240.85														1240.85
YLR037C	PAU23	Verified	1240.85	1240.85														1240.85
YMR026C	PEX12	Verified	1133.73	1240.85	41.4602	1198	1478	205.033						1262.56				1240.85			1644.67					907
YML005W	TRM12	Verified	1815.93	1241	64.9579	1241	1044	240.01			4177.82		2379.6	1219.28		3001.04	2884.06	1222.26			1910.16					656
YGR257C	MTM1	Verified	8977.72	1241.43	249.082	64300	2081	68.4266	845.342					1266.51				1216.36			1506.09					538
YNL304W	YPT11	Verified	1383.68	1242.54	85.9213			55.6184			407.012			537.597				1242.54			1518.48				3074.51	2850
YMR156C	TPP1	Verified	1169.82	1242.59	69.3372		2084	145.571			1258.7			317.503		1986.64		1226.48
YML041C	VPS71	Verified	1547.73	1243.39	91.6268			107.379			754.845			215.616		3873.92		1243.39			1650.96				2988.01
YOR387C	YOR387C	Uncharacterized	1243.52	1243.52	10.4325								1335.26					1151.79
YDR366C	YDR366C	Uncharacterized	1244.24	1244.24														1244.24
YMR244W	YMR244W	Uncharacterized	1244.24	1244.24														1244.24
YOR192C	THI72	Verified	1244.24	1244.24														1244.24
YKL033W	TTI1	Verified	1042.33	1244.39	53.4257		1504	109.411			659.553			1244.39		1448.63		1609.32								721
YDR309C	GIC2	Verified	1148.55	1244.9	43.1854		1518	198.975			1180.88							1308.91			1554.52					1130
YLR307W	CDA1	Verified	1245.08	1245.08														1245.08
YGL192W	IME4	Verified	1245.93	1245.93														1245.93
YHR011W	DIA4	Verified	1518.88	1246.47	92.1923		1595	160.425	562.913					2530.49	4400.67	897.938		1598.64								405
YHR021W-A	ECM12	Uncharacterized	1246.78	1246.78														1246.78
YPL282C	PAU22	Verified	1246.78	1246.78														1246.78
YJR108W	ABM1	Verified	1247.63	1247.63														1247.63
YHR185C	PFS1	Verified	1249.32	1249.32														1249.32
YHR079C-A	SAE3	Verified	1249.32	1249.32														1249.32
YLL060C	GTT2	Verified	1296.61	1250.17	81.1716				268.123									1250.17		2371.55
YNL187W	SWT21	Verified	1250.17	1250.17														1250.17
YLR297W	YLR297W	Verified	1250.6	1250.6	37.1589																	1579.2				922
YLL019C	KNS1	Verified	1369.31	1251.86	51.3705		732		2124.05									1251.86
YGL258W-A	YGL258W-A	Uncharacterized	1251.86	1251.86														1251.86
YDL138W	RGT2	Verified	1251.86	1251.86														1251.86
YDR485C	VPS72	Verified	2014.44	1252.88	147.471	331	1024	154.735	1252.88		1501.87			2771.85	10698.6	1097.91		1495.25			1472.73					358
YER064C	VHR2	Verified	1068.52	1253.46	68.3126			37.1614								1133.56		1373.36								1730
YDR317W	HIM1	Verified	1253.56	1253.56														1253.56
YPL068C	YPL068C	Uncharacterized	1380.47	1253.86	90.3229	927		26.1449													1580.72				2988.01
YLR263W	RED1	Verified	1255.26	1255.26														1255.26
YDR186C	YDR186C	Verified	1392.01	1256.43	77.0301	345	2372	140.441			1630.7			677.913		882.167	3062.06	2314.87			2299.97					195
YJR012C	YJR012C	Uncharacterized	3365.32	1256.95	127.462		8301											1256.95								538
YNL107W	YAF9	Verified	1407.12	1257.33	76.2974		2355	116.763			1815.51		619.315	1257.33		1193.86		1526.03		3521.29						259
YDR338C	YDR338C	Uncharacterized	1363.01	1257.8	88.8918		2924									214.504	2223.73	1257.8								195
YLR460C	YLR460C	Uncharacterized	1204.38	1257.8	47.1837			276.284			1509.84		1970.27	1630.74		986.729		1257.8								799
YLR376C	PSY3	Verified	1150.26	1257.8	20.8083											1316.97		1257.8								876
YGR134W	CAF130	Verified	1268.16	1258.15	83.8495		665	26.0241			1294.65			1221.64		378.236		1737.64	3502.04							1320
YDR073W	SNF11	Verified	1152.01	1258.15	68.9788		1893	138.119						330.336				2034.32			1486.31					1030
YDR115W	MRX14	Verified	1899.33	1258.6	86.654				1258.6					1217.52				2300.53		4525.01						195
YFL064C	YFL064C	Uncharacterized	1258.65	1258.65														1258.65
YIL045W	PIG2	Verified	1222.3	1258.72	59.2456		2014	99.2491			1019.37		1258.72	1657.6		297.252		1364.73						2293.75		996
YHR075C	PPE1	Verified	1098.98	1258.72	49.0713		1847	420.848			1402.85		1258.72	339.23		1261.55		1162.64
YER037W	PHM8	Verified	1295.4	1259.5	70.8569		2072	220.886					810.52	2189.49				1259.5						2320.44		195
YPL267W	ACM1	Verified	1261.8	1260.35	69.0034		2433							204.277		1723.4		1260.35								688
YKL162C	YKL162C	Uncharacterized	1137.34	1260.5	74.2898			6.83086										1421						2021.54		1100
YIL107C	PFK26	Verified	1583.66	1260.62	88.2797	595	4274	289.466	1360.8		3895.92		1160.43	811.734		372.783		1366.46								1710
YKL003C	MRP17	Verified	1544.35	1260.78	60.6659			597.474			800.341			2406.48	2656.67	1260.78
YMR036C	MIH1	Verified	1260.96	1260.96	75.4749		588																	1933.92
YKR063C	LAS1	Verified	1146.2	1261	52.1311		1261	190.982			1495.38			1990.02		971.826		1467.21								647
YBL059W	YBL059W	Uncharacterized	1383.03	1261.03	78.0833			65.1106		1919.61				1185.72				1336.34							3168.38	623
YDR249C	YDR249C	Uncharacterized	2503.36	1261.2	131.833			4.42529							6244.45			1261.2
YLR177W	YLR177W	Uncharacterized	1536.6	1261.69	83.7983		1249	174.021			690.454		1274.39	210.406		1061.52		1576.43	3959.19						3620.59	1550
YNR020C	ATP23	Verified	1092.95	1261.75	34.8593		651		722.904		1333.86			1261.75				1495.25
YOR227W	HER1	Verified	1819.4	1262.04	92.9988		1598	377.033	926.075		4918.18			1834.98		886.29			3819.65							195
YNL332W	THI12	Verified	1262.04	1262.04														1262.04
YDL199C	YDL199C	Uncharacterized	1344.03	1262.89	102.691		2763	6.18909										1262.89
YBL080C	PET112	Verified	1665.89	1262.89	81.2948		384	105.551	513.716		1201.55		3593.03	1219.44		612.088		1306.35	4031.37	3551.68				2081.89		1390
YER096W	SHC1	Verified	1263	1263		1263
YDR363W	ESC2	Verified	1911.12	1263.46	86.265		1112	95.8641			1074.67			4953.09		880.333		1414.92	3868.04							1890
YOL096C	COQ3	Verified	1117.75	1264.36	47.605		1088	397.433			871.922		1289.86	1264.36	1882.52	1587.39		1419.26								259
YPL018W	CTF19	Verified	1455.15	1264.99	76.1669	3482		160.917						944.241		1279.98		1613.77								1250
YPL196W	OXR1	Verified	1457.21	1265	65.4368		3632	368.049	1482.27		1079.96		1005.38	1172.14		1357.86										1560
YJL218W	YJL218W	Uncharacterized	1396.17	1265.44	66.7973			130.499			2204.02	971.35				2409.52		1265.44
YJR146W	YJR146W	Uncharacterized	1233.22	1266.29	21.5882													1266.29			1481.37					952
YKL043W	PHD1	Verified	1111.8	1267	84.2347		1114	14.0988	211.412					82.7607				2043.65		2508.58	1499.91					1420
YBR027C	YBR027C	Uncharacterized	1267.14	1267.14														1267.14
YOR231W	MKK1	Verified	1185.13	1268.54	50.5946		1736	121.915			1675.76			1478.39		1058.68										1040
YBL034C	STU1	Verified	2871.9	1268.96	179.259	228	1590	277.391			1721.9	16446.6		2627.25		1268.96		1165.98								521
YNL136W	EAF7	Verified	1173.77	1270.41	63.2753		1419	207.815			1270.41			695.583		830.188		1708.76		2525.16	1606.99					300
YLR013W	GAT3	Verified	1270.54	1270.54														1270.54
YDR191W	HST4	Verified	1362.45	1270.54	75.927													1270.54		2439.8						377
YOR040W	GLO4	Verified	1355.51	1271.39	73.4045		2759	109.42						856.345		1781.38		1271.39
YNL230C	ELA1	Verified	1188.01	1272.24	77.2495		2538	10.433								1304.38		1272.24								815
YFL065C	YFL065C	Uncharacterized	1272.24	1272.24														1272.24
YMR284W	YKU70	Verified	3091.33	1273.05	192.668	19905	997	126.159			1326.37			1545.02		469.441		1219.73		2969.7	1462.88					892
YMR068W	AVO2	Verified	1083.01	1273.23	57.0973		191											1366.46				1594.59				1180
YML104C	MDM1	Verified	1604.57	1273.94	84.5461			13.3627						3354.25				1273.94						2597.28		784
YOR161C	PNS1	Verified	2188.15	1273.94	105.645		628	38.3624				6023.43		97.3382				1273.94		2940.79				4315.16
YGL160W	AIM14	Verified	1108.62	1274.55	68.4926		1142	125.191			2090.76			1578.26		308.402		1407.11
YIL088C	AVT7	Verified	1339.73	1274.79	72.0268		719	177.63			1767.03			3144.27		915.594		1274.79			2129.77	1734.45				195
YHL005C	YHL005C	Uncharacterized	1274.79	1274.79														1274.79
YML083C	YML083C	Verified	1274.79	1274.79														1274.79
YLR204W	QRI5	Verified	1274.79	1274.79														1274.79
YBR063C	YBR063C	Uncharacterized	1275.64	1275.64														1275.64
YBR285W	YBR285W	Uncharacterized	1276.5	1276.5														1276.5
YOL068C	HST1	Verified	1167.68	1276.59	50.2826		1645	180.333			627.805	829.729		1899.61		1113.19		1605.76								1440
YER111C	SWI4	Verified	1250.42	1278.21	59.1584		2655	194.95			1487.45		1168.93	1387.5		925.419		1595.08								589
YAL010C	MDM10	Verified	1755.96	1278.61	92.6237	1777	5296	248.809			321.155		923.722	1889.91		1278.61								3300.39		768
YDR217C	RAD9	Verified	1049.82	1279	71.4354		1279	57.0252			1979.8					419.647		1733.13			1480.14					400
YGR133W	PEX4	Verified	1991.78	1279.46	109.987		4450	245.884								1279.46
YMR040W	YET2	Verified	1280.75	1280.75														1280.75
YLR422W	DCK1	Verified	1336.3	1280.77	59.9618	1055	1087	94.1175			1153.12	2410.18		1408.42		612.921	2122.57	1636.97			1581.97			2635.38		238
YMR141C	YMR141C	Uncharacterized	1281.6	1281.6														1281.6
YOR346W	REV1	Verified	18407.7	1281.6	209.567			5.2934										1281.6					87388.9	2841.89		521
YIL013C	PDR11	Verified	1282.15	1282.15									1282.15
YGR222W	PET54	Verified	1510.33	1282.21	64.2337		3218	410.292	823.57	2137.19	1205.07			1359.36		690.072					1472.73				2988.01	799
YMR265C	YMR265C	Uncharacterized	1187.84	1282.59	77.4692		2057	223.918						1282.59
YFR046C	CNN1	Verified	1597.13	1283.31	67.0221	3486	1036									880.333		1283.31								1300
YLR341W	SPO77	Verified	1283.31	1283.31														1283.31
YNR032W	PPG1	Verified	1503.28	1283.74	84.2012		3718	189.138			585.07			943.91				1623.58								1960
YIL003W	CFD1	Verified	1787.07	1284.53	70.996		3391	883.988			1437.47		587.097	1284.53		3793.58		1131.81
YJL051W	IRC8	Verified	1285.01	1285.01														1285.01
YAL048C	GEM1	Verified	1496.14	1285.48	88.9055		1368	272.98			548.954		4015.18	1568.76		1202.97
YKR027W	BCH2	Verified	2471.76	1286.72	142.49	11429	589	180.316			219.96			3280.25		810.426		1286.72			1910.16					2540
YEL068C	YEL068C	Uncharacterized	1288.73	1288.73	36.9518																	1625.46				952
YBR108W	AIM3	Verified	1691.28	1290.13	90.7693	386	4703	220.087			2545.54			1539.73		1154.5		1290.13
YGL098W	USE1	Verified	1600.26	1290.39	61.8244		3404	742.48			1937.32			1008.18							1572.6					937
YMR168C	CEP3	Verified	1337.2	1291.94	70.5461		738	137.573						701.488		539.086		1845.88			1928.29			2907.27		1900
YGL118C	YGL118C	Uncharacterized	1293.54	1293.54														1293.54
YOR223W	DSC3	Verified	1444.38	1295.43	67.4951	2223	2543	94.0478			1295.43					1066.45
YCR010C	ADY2	Verified	1298.19	1298.19												1298.19
YJL216C	IMA5	Verified	1298.66	1298.66														1298.66
YHR106W	TRR2	Verified	2897.99	1299.21	94.1808		4575	564.39	9354.43	4800.75	964.661	1299.21	2719.24	1255.67		4657.42		1273.09								414
YOR322C	LDB19	Verified	1506.18	1299.25	76.0018		3365	111.422			1159.18			1439.31		819.03					2444.08	2416.43				295
YBR161W	CSH1	Verified	3015.28	1299.51	145.089	10643	308											1299.51		2630.91						195
YGR150C	CCM1	Verified	1365.02	1299.51	72.1924		634	38.1954			1996.37			2896.55		544.056	2211.97				1723.03					876
YDL241W	YDL241W	Uncharacterized	1300	1300																						1300
YCL061C	MRC1	Verified	1432.86	1301.64	70.2177		1050	182.263			3569.63			1707.61		1026.93		1652.18			1553.28					721
YGL226W	MTC3	Verified	1325.32	1301.93	12.6943									1301.93				1504.03								1170
YPL157W	TGS1	Verified	1139.46	1302	67.7187		1302	98.7676			562.426			576.657		1402.15		1697.95		2336.28
YLR082C	SRL2	Verified	1464.14	1302.01	76.2093		3186	224.979			2231.87			1637.54		966.476										538
YFL033C	RIM15	Verified	1421.63	1302.08	82.2853	178	2009	62.4009			1335.73		1822.13	946.966		1268.43			3750.42
YDR286C	YDR286C	Uncharacterized	2121.03	1302.28	104.449		2969	373.577			1302.28		457.361	1857.72		6729.65		1157.63
YDR379C-A	SDH6	Verified	2420.42	1304.15	72.8624			944.065		4864.83	1304.15	1161.04				5429.25		1223.95		2602.96					3392.52	861
YDR275W	BSC2	Verified	1107.9	1304.78	75.0117			9.94518										1812.09				1687.56				922
YLR125W	YLR125W	Uncharacterized	1193.88	1305.49	93.9878		2256	20.1418										1305.49
YOR166C	SWT1	Verified	1244.78	1306.76	53.1742		2171	176.453			1350.62			954.133		1553.59		1262.89
YGR015C	YGR015C	Uncharacterized	1308.06	1308.06														1308.06
YDR042C	YDR042C	Uncharacterized	1308.91	1308.91														1308.91
YNL167C	SKO1	Verified	1266.11	1309.68	57.9821	1068	2251	216.512	610.201		2083.6			1309.68		522.576		1507.55			1690.09			2164.04		504
YDR440W	DOT1	Verified	1256.29	1310	67.6899	1846	1310	144.283	297.27		2539.68			1086.08		408.525					1514.77					2160
YPL189W	GUP2	Verified	1311.48	1311.48														1311.48
YOL130W	ALR1	Verified	1541.74	1312.4	53.2178		1035	355.875			2241.88			1312.4		2760.29		1125.99			1960.75
YBR275C	RIF1	Verified	1377.46	1314.9	88.85	1408	481	90.6772			3889.65			1518.54		939.438		1314.9
YPL175W	SPT14	Verified	1389.69	1315.19	67.4356	566		48.8715			1150.38			2013.04		724.201				2566.76		2568.29				1480
YDR495C	VPS3	Verified	1199.13	1316	53.0335		1316	125.373			1216.45		516.853	1342.18		836.198		1643.23			1525.93					2270
YGR068C	ART5	Verified	1347.36	1316.59	49.9127		1930	392.369			889.363			794.528		908.192		1725			2169.44					1970
YDR357C	CNL1	Verified	1833.22	1316.62	122.579		6826	303.1			865.288			1405.52		1526.99		1316.62								589
YHR213W	YHR213W	Uncharacterized	1318.33	1318.33														1318.33
YOL117W	RRI2	Verified	1320	1320																						1320
YLR242C	ARV1	Verified	1321.5	1321.5	32.1582	1021	1622
YOR307C	SLY41	Verified	1460.66	1322.37	70.6573		2174	180.027						552.06		776.355	3140.84				2217.23	1860.73				784
YMR163C	INP2	Verified	1986.51	1322.61	109.202	5776	457											1322.61				1640.94				736
YLL025W	PAU17	Verified	1322.61	1322.61														1322.61
YJR066W	TOR1	Verified	1761.83	1323.2	89.76	3405	485	225.019	559.675		4532.44			2241.08		2057.39										589
YDR043C	NRG1	Verified	2742.16	1323.47	114.705		6347											1323.47								556
YHL042W	YHL042W	Uncharacterized	1324.33	1324.33														1324.33
YDR239C	YDR239C	Verified	1539.31	1324.67	82.9115		4112	311.15			2165.73		347.53	1012.36		958.105		1636.97			1686.29				3007.91	155
YJR120W	YJR120W	Verified	1325.18	1325.18														1325.18
YOR127W	RGA1	Verified	1270.26	1327.54	79.3169		1077	117.257			2291.65			1578.09		220.048					1589.47			2892.57		396
YNL299W	TRF5	Verified	1343.59	1328.66	62.0222		1488	166.248					2658.96	884.841		555.651		1169.33			1585.72					2240
YER093C-A	AIM11	Verified	1575.75	1329.02	80.1648		3844	50.1639			1169.69			1062.31		1488.34										1840
YER132C	PMD1	Verified	1475.9	1330	72.2569		1330	88.3587			1279.42					185.508	2297.58	1833.99			1992				3461.22	815
YOR339C	UBC11	Verified	4809.21	1331.19	126.195	11817										1279.46		1331.19
YGR154C	GTO1	Verified	1105.37	1332.04	43.6671		1433		551.073									1332.04
YDR480W	DIG2	Verified	1502.11	1332.2	65.2048		3281	305.804			1035.99			506.21		2344.68		1354.39						1878.8		1310
YPR093C	ASR1	Verified	1332.9	1332.9														1332.9
YDL177C	YDL177C	Uncharacterized	1504	1332.9	70.9395		3322	584.463								1373.63		1332.9								907
YBL095W	MRX3	Uncharacterized	1876.24	1333.76	86.3296		836	171.901		3312.69				1097.09	5398.77	2344.35		1333.76				1687.56				704
YLR099W-A	MIM2	Verified	2185	1334.36	79.2248			1094.27			550.587		3262.77		1334.36	4683.02
YDR437W	GPI19	Verified	1335.21	1335.21	61.772													1918.43								752
YJL035C	TAD2	Verified	6335.45	1335.8	183.455						915.287					1335.8		1475.09							27121.1	830
YIR017C	MET28	Verified	2600.83	1336	89.9462	1336	6173		639.676					1081.64										3773.86
YER119C	AVT6	Verified	1336.9	1336.9	0.116099		1338									1335.8
YIR033W	MGA2	Verified	1440.72	1338.66	73.4182	2610	542	135.462			3532.91		1777.6	1513.84		1018.77		1163.48				1813.17				300
YHR044C	DOG1	Verified	3144.77	1338.91	104.86								5874.2	275.136		7483.61		1338.91								752
YHL022C	SPO11	Verified	1338.91	1338.91														1338.91
YIR010W	DSN1	Verified	1248.57	1339.19	70.5941		2906	119.221			1368.38			716.88		366.846		1388.92			1812.31					1310
YAL064C-A	TDA8	Uncharacterized	1339.77	1339.77														1339.77
YKR052C	MRS4	Verified	1486.08	1340	60.8991			455.589			1170.43			352.936		2349.63	2093.46				2640.51					1340
YIL119C	RPI1	Verified	1586.27	1340	68.5185		1197	12.702			2709.13			621.797		2381.51								2841.76		1340
YOR213C	SAS5	Verified	1190.19	1341	54.8239		1341	92.0171						1208.13							1509.81					1800
YDL244W	THI13	Verified	1344.07	1344.07														1344.07
YCL058C	FYV5	Verified	1344.93	1344.93														1344.93
YDR315C	IPK1	Verified	1344.93	1344.93	39.5437		1721									968.869
YPL040C	ISM1	Verified	1763.89	1345.11	77.4307		668	72.7405			1347.55		1342.68	2826.47		808.641				3141.83	1543.32			4617.63		1270
YCR023C	YCR023C	Verified	1343.84	1345.28	53.523		1486				112.366					1160.41	2054.09	1204.57			2045.59
YLR073C	RFU1	Verified	1453.12	1345.86	102.628			19.4995													2314.71				3101.25	377
YDR359C	EAF1	Verified	1821.26	1346.2	91.0317	974	1508	156.935			3743.22	4922.11		1641.4		440.002		1184.41
YGR018C	YGR018C	Uncharacterized	1346.65	1346.65														1346.65
YDL077C	VAM6	Verified	1615.76	1346.65	72.4262		1323	299.748			2186.14			3567.32		735.642		1346.65			1575.72				3188.59	319
YLR092W	SUL2	Verified	1499.79	1347.51	40.4441		2168		983.866									1347.51
YNL321W	VNX1	Verified	1411.01	1347.51	67.3181		2373	178.895			2641.18			1323.3		1754.21		1347.51								259
YDL027C	MRX9	Uncharacterized	1515.93	1348.11	88.2597		3270	521.278			64.553			2614.8										2174.95		450
YJL134W	LCB3	Verified	1422.16	1348.95	62.1035		1365	58.4117						2150.76		1040.62		1332.9				2585.28
YDR475C	JIP4	Verified	1770.64	1349.68	96.7547		2664	107.16			4275.12			1349.68		457.242
YCR079W	PTC6	Verified	1216.39	1349.99	45.5882		1305									1733.6		1394.98								432
YLR039C	RIC1	Verified	1388.53	1350.06	76.4104	325	361	217.836			2166.96	1217.07	1350.06	1485.02		1027.59	2489.88	1947.04			1566.99			3817.87		78.6
YER098W	UBP9	Verified	1128.05	1350.09	90.0983		2076	29.3005						2085.95				1350.09								98.9
YMR166C	MME1	Verified	1350.9	1350.9	74.234									641.792												2060
YFR057W	YFR057W	Uncharacterized	1351.81	1351.81														1351.81
YGL036W	YGL036W	Uncharacterized	1221.22	1351.99	63.7218		1230	142.881			1351.99			2335.78		250.471		1449.74			1730.65			2013.49		486
YAL002W	VPS8	Verified	2602.03	1352.67	136.435		1194	125.643							11716.4	836.107		1352.67		2752.01	1537.11				3168.38	736
YOR037W	CYC2	Verified	1284.41	1353.94	69.7549		1491	37.0475			740.51			1453.16		1254.71										2730
YDL030W	PRP9	Verified	1735.27	1354.85	79.6663		1772	290.853			704.896			937.708		726.4		1848.62	3681.68							3920
YDL240W	LRG1	Verified	1597.86	1355.45	70.2811	2277	1158	230.815			1729.04	1355.45	649.981	2971.62		1022.88					1750.36			3963.36		468
YBR157C	ICS2	Verified	1355.57	1355.57	19.5534		1543									1168.15
YDL091C	UBX3	Verified	1374.85	1356.15	96.0334		1502	165.282	526.775		326.165			1356.15		2064.2			4307.45			1892.59				233
YML107C	PML39	Verified	1406.4	1356.73	52.0942		1840	213.341			1029.08			2410.65		834.677		1262.89			1450.57					2210
YGR227W	DIE2	Verified	1356.75	1356.75	120.169						203.888			2509.62
YOL072W	THP1	Verified	1835.82	1358.13	96.6353		799	14.4867								1169.21	2395.38	1747.6	5873.86		1547.05					1140
YHR091C	MSR1	Verified	1197.38	1358.14	66.8916		881	46.0602	1358.14				2211.77	1489.9
YGL240W	DOC1	Verified	3441.21	1360	142.028		11976	151.416			730.635														2988.01	1360
YBR197C	YBR197C	Verified	2041.12	1360	89.8244		6321	287.973			1175.4		516.853	1275.05				1921.19			2344.24				3168.38	1360
YNL072W	RNH201	Verified	1587.41	1360.13	82.8897		1998	479.789			2886.35	39.7018		1271.39		3952.16		1448.87								623
YJR043C	POL32	Verified	1615.07	1362.84	64.1957		1101	328.998			1362.84	833.317	2040.42	3848.12		1393.7		1217.2								2410
YDR118W	APC4	Verified	1033.35	1363.54	67.8041		221	122.914			1744.52			1397.08		266.001		1533.09			1652.22					1330
YNL011C	YNL011C	Uncharacterized	2136.91	1364.47	108.276		957	120.966			2485.52	1394.54	7961.2	1364.47		2636.39		1212.14								1100
YAL034C	FUN19	Verified	1081.92	1365	87.9876		1365	20.5349					1860.24
YEL069C	HXT13	Verified	1365.59	1365.59														1365.59
YKR010C	TOF2	Verified	1176.62	1365.93	55.0817		1082	107.845			1752.7			1119.86		1612.01		1787.51			1612.01					339
YER045C	ACA1	Verified	1366	1366			1366
YML061C	PIF1	Verified	2437.67	1366.03	139.532	10411	1170	60.4379			1562.06			2468.28		409.456		3161.16								259
YNL257C	SIP3	Verified	3423.57	1367.36	186.134	19008	188	163.8			1296.31			1760.8				1438.41							3101.25	432
YDR206W	EBS1	Verified	2327.47	1367.81	119.102	342	1583	362.719			8530.93		649.981	3962.11		2036.39		1152.62
YMR281W	GPI12	Verified	1330.05	1369.93	53.634		1525	456.33			752.545			1264.65		2506.55					1475.2
YMR041C	ARA2	Verified	2277.67	1370.09	90.7512		4692	311.58		5692.17	1370.09		923.722	1891.33		1062.82
YDL245C	HXT15	Verified	1370.17	1370.17											1370.17
YPL281C	ERR2	Verified	1391.68	1372.5	42.3596	812							1990.56					1372.5
YHR209W	CRG1	Verified	1794.42	1373.63	75.5395		1421	195.286			1140.75		1342.68	2707.6		1373.63										4380
YDR470C	UGO1	Verified	1575.33	1376.2	72.1968		3656	185.02		2055.26	1376.2		880.142	2032.23		842.476
YDR416W	SYF1	Verified	1270.09	1376.85	65.8167		546	62.8496						1056.02		512.739	2226.45	1888.97			1697.68					2170
YKL146W	AVT3	Verified	1367.02	1377.68	42.7232	1285	1326	23.3152			1170.02					1758.98		1377.68			1507.33	1734.45		2120.39
YMR181C	YMR181C	Uncharacterized	2423.89	1377.68	99.1517		5173											1377.68								721
YOR358W	HAP5	Verified	1494.1	1378.73	72.303		3652	181.678						1128.07		1162.98	2146.66	1636.97			1594.47					450
YMR081C	ISF1	Verified	1380.52	1380.52	16.4434		1220											1541.03
YNL083W	SAL1	Verified	1393.63	1380.55	15.5692									1643.42				1261.2			1499.91					1170
YCR100C	YCR100C	Uncharacterized	1381.4	1381.4	15.8602								1536.33					1226.48
YBR001C	NTH2	Verified	2644.41	1381.82	136.713		1240	27.7276			1381.82	2348.4	12093.2	1185.46				1335.48			1687.56					2500
YGR023W	MTL1	Verified	1445.81	1382	101.487		2944	11.4451										1382
YML076C	WAR1	Verified	1265.93	1383	50.1874		1383	87.0333			1697.42			1317.07		604.598	2166.33	1526.92			1704.01					907
YFR005C	SAD1	Verified	2002.83	1383.34	92.2799		1389	400.845			687.998		1400.66	1377.68		5586.55		1261.2	4749.5						3007.91	167
YCR082W	AHC2	Verified	1340.98	1383.86	62.9391						348.08							2248.11			1786.71					981
YOR284W	HUA2	Verified	1243.34	1384	38.8451		1384	280.46						953.183		1655.52		1620.9			1449.34					1360
YCL021W-A	YCL021W-A	Uncharacterized	1384.59	1384.59														1384.59
YOR186W	YOR186W	Uncharacterized	1384.59	1384.59														1384.59
YMR020W	FMS1	Verified	1862.64	1385.6	101.935	811	884	329.505			1402.65		2589.53	869.045	1368.54	1822.37		1589.75								6960
YDR306C	YDR306C	Verified	1386.33	1386.33	13.7201						1520.83			1251.83
YIR015W	RPR2	Verified	1230.51	1386.8	69.7708			78.4429								1131.45					1642.15					2070
YLR015W	BRE2	Verified	1628.71	1387.19	55.7002		3334	450.548			2081.64		2373.65	1230.39		568.887		1387.19						1922.08		1310
YPR003C	YPR003C	Uncharacterized	1242.38	1387.19	72.2155											281.595	2058.37	1387.19
YNR011C	PRP2	Verified	1126.58	1387.77	63.9062		564	210.865			2107.45			1288		1667.34		1515.47			1487.54					172
YJR058C	APS2	Verified	1339.02	1390	57.3941			77.5433					846.028					1163.48		2514.1	1537.11	1844.85				1390
YAL055W	PEX22	Verified	2823.54	1390.65	110.18		6159	151.041	1234.23						8159.81			1390.65						2411.03		259
YPL046C	ELC1	Verified	2443.05	1391.51	134.276		11947	627.665	884.327		1767.94		1168.93	724.117				1391.51		3265.99	1550.17				3007.91	538
YHL014C	YLF2	Verified	1459.53	1391.66	53.3799		1623	115.392		2600.37	1054.07			1509		1274.32		1140.12								2360
YGL138C	YGL138C	Uncharacterized	1392.01	1392.01	20.5805													1189.44				1594.59
YFL024C	EPL1	Verified	1418.42	1392.78	60.6472	229	2784	258.313			2394.46			1160.77		1392.78		1715.97			1720.49					1110
YDL056W	MBP1	Verified	1347.3	1394.42	82.5842	339	2651	180.13			1609.16		1234.86	1553.99		173.827			3531.29		1678.71					521
YOR106W	VAM3	Verified	1566.45	1394.43	61.122		2306	862.099			1844.08		944.779	3151.43		775.782						2233.44				414
YMR150C	IMP1	Verified	1662.84	1394.62	74.9857		3406							456.114		1507.64		1281.6
YJR013W	GPI14	Verified	1570.92	1394.62	80.2935		656	53.3813			337.879			536.134		539.086	2992.97	2263.34			2961.31			2133.25	3235.87
YKR097W	PCK1	Verified	2250.53	1395.02	96.845	1421		26.103				5719.2	4096.03			871.797		1369.04
YOR219C	STE13	Verified	1205.81	1395.26	48.6463		1443	496.399			1988.91			1401.61		516.05		1388.92
YDR538W	PAD1	Verified	1078.18	1396.24	61.9366			64.346						771.478		1396.24		1408.84								1750
YML023C	NSE5	Verified	1552.8	1396.86	92.6316			31.0006											3386.49					1886.72		907
YMR287C	DSS1	Verified	1616.6	1400.33	59.5758		3310	89.311			1244.1		2040.42	2378.33		1430.75		1369.91								1070
YPL241C	CIN2	Verified	1483.83	1400.66	56.8714		992	323.703			688.088		1400.66	1137.26				2062.34			1978.96				3141.48	1630
YAR033W	MST28	Verified	1400.76	1400.76	119.844			213.716								2587.81
YML027W	YOX1	Verified	1470.36	1401.78	37.343		1139	1401.78										1650.39				2299.64				861
YNL140C	YNL140C	Uncharacterized	1402.34	1402.34	18.9254													1214.67								1590
YOL023W	IFM1	Verified	2035.16	1402.92	125.135		319	86.2963			1405.83		1125.82	2616.44		551.372	2200.49				1730.65			8915.71		1400
YBL010C	YBL010C	Uncharacterized	1450.19	1403	52.8881		1403	180.815			672.528			1291.94		915.594		1474.21		2352.54	1692.62	1640.94			3007.91	1320
YPR147C	YPR147C	Verified	1600.15	1403.64	46.8576		420	888.384			1373.82		1386.39	2950.45		2281.07		1403.64				1687.56				2010
YJR115W	YJR115W	Uncharacterized	1404.51	1404.51														1404.51
YEL033W	MTC7	Uncharacterized	1405.38	1405.38														1405.38
YMR185W	RTP1	Verified	1124.31	1405.38	50.5394	825	440	160.15			1721.76	1507.23	902.188	1738.15		1418.96		1405.38
YOL137W	BSC6	Verified	1179.39	1407.11	67.7387		1918	83.6694			2107.37					622.441		1407.11				1703.16				414
YDR069C	DOA4	Verified	2726.59	1408	145.93	13099	1408	294.397			2960.31			978.91		1407.07		1689.86						2273.75		428
YPL065W	VPS28	Verified	1763.64	1408.35	89.1862		5478	837.522					1273.61	316.396		1510.2		1396.71				1876.65				1420
YLR149C	YLR149C	Verified	1488.68	1409.2	64.7833		1455	55.1283			1363.39							1141.79		2995.78				1920.96
YMR167W	MLH1	Verified	1428.4	1411.64	65.5038		2051	578.432			1525.48		1536.33	3274.57		844.575		1297.81								319
YIL160C	POT1	Verified	1416.05	1413.13	57.6418	856	2249						1970.27			588.94
YOR054C	VHS3	Verified	2059.43	1413.18	79.8698	466	3607	235.555			1317.47			1508.9	4639.42	3575.11		1125.99
YHR036W	BRL1	Verified	1568.92	1413.22	81.0711		971	111.843			866.074			1578.56		596.06	2246.92	1751.22	4741.05		1546.43					1280
YML095C	RAD10	Verified	1508.17	1414.92	88.9312		1502	156.705			563.853			282.318				1414.92	3381.19						3256.2
YBR280C	SAF1	Verified	1905.89	1415.4	101.365		1107	116.956		1048.42	1858.77	1815.42	6851.08	1415.4		1784.82		1155.13
YJL137C	GLG2	Verified	1637.9	1416.66	62.2572		1358	153.155			2457.15			400.266		2931.44		1416.66		2763.35				2280.09		981
YOR107W	RGS2	Verified	1416.66	1416.66														1416.66
YOR038C	HIR2	Verified	1854.56	1417	77.5097	4782	1417	411.81			1893.97			2357.17		1197.98										922
YDR192C	NUP42	Verified	3391.97	1419.14	153.171		13863	399.477			2060.57		2498.07	753.007		777.72
YOR305W	RRG7	Verified	1250.59	1420	60.7856			252.56						767.03		2216.51		1596.86								1420
YGR166W	TRS65	Verified	1433.18	1420.53	67.1562		2464	216.3			631.114			2995.36		614.87		1181.05			1702.74					1660
YDR464W	SPP41	Verified	1886.92	1421.82	87.8151		1237	68.2046			2425.54	4742.1		482.645		732.268		1606.65	3800.95
YOL065C	INP54	Verified	1346.88	1421.87	60.1716	1448	2071	26.4821						771.676		2489.16		1421.87								1200
YHR177W	YHR177W	Verified	1422.74	1422.74														1422.74
YNL213C	RRG9	Verified	1683.82	1422.74	65.1161									656.395				1422.74			1649.7				3530.28	1160
YBR192W	RIM2	Verified	2385.81	1423	84.905		1423	430.391	942.385	498.31	1017.93		2719.24	5836.33	5075.45	3529.25
YDR205W	MSC2	Verified	1466.48	1425	73.2218		1780	51.5274			189.067			813.369		897.365	3548.74	2063.27			2422.43	1828.99				1070
YEL029C	BUD16	Verified	2761.06	1425.73	94.9529		1943	697.878			908.464		868.915	6562.2		5585.92
YPL141C	FRK1	Verified	1656.27	1426.82	101.321	5808		42.7243			1317.7			1426.82		611.384	2078.53	1604.87			1460.41					556
YEL018W	EAF5	Verified	1822.95	1429.98	55.7844		1344	495.359			1050.01		1289.86	1429.98		3935.75	2070.14	2252.87			2106.03				3141.48	937
YER127W	LCP5	Verified	2006.19	1430	66.0564		2840	790.331	553.697	641.964	3099.86	1100.83	3732.51	2462.8		4272.66		1143.46								1430
YOR245C	DGA1	Verified	1535.18	1430.66	51.1262		1152	362.848						1020.91		1430.66				2439.8	1585.72	2134.89		2782.8		907
YNL058C	YNL058C	Uncharacterized	1162.08	1430.75	58.9409			29.7778			843.506			612.475		1430.75		1642.34			1934.78	1640.94
YNL214W	PEX17	Verified	1281.41	1430.75	42.964		1373							395.338		1430.75		1509.31			1712.88	1892.59				656
YJL102W	MEF2	Verified	1283.67	1431.63	62.2599		495	73.3497			1395.45			2190.35		666.449		2250.97			1467.8					1730
YOR191W	ULS1	Verified	6657.53	1434	232.818		1434	69.2042			1861.78	3685.87	47901.9	1288.97		513.646		1221.42						1940.93
YGR171C	MSM1	Verified	1712.57	1435.7	66.2705		1204	191.801			908.464			893.754		846.574		1667.41			1728.11			3424.07	3141.48	3120
YJL144W	YJL144W	Verified	1575.43	1435.79	95.2835													1435.79							3141.48	149
YGR149W	GPC1	Uncharacterized	1772.05	1435.81	61.3806		3305	376.93			934.213		3281.76	1317.34		1094.97		1554.29		2311.94
YKR077W	MSA2	Verified	2431.78	1436	112.355		1436	1016.92						7292.48				1552.52								861
YIL024C	YIL024C	Uncharacterized	1436.45	1436.45	10.1946													1332.9								1540
YFR007W	YFH7	Verified	2876.7	1437.4	118.285		3333	465.06		55.5893	1437.4	9048.86	570.325	2864.76		7954.32										161
YGR044C	RME1	Verified	1453.23	1441.1	66.2671		941	84.7161			1823.46			1507.62		1374.58									2988.01
YDR439W	LRS4	Verified	1473.09	1441.2	62.2662		751	167.159			1969.63			1441.2				1518.11							3074.51	1390
YBR147W	RTC2	Verified	1442.76	1442.76														1442.76
YKR022C	NTR2	Verified	1252.51	1442.93	52.3426		2097	165.032			1467.46							1418.4			1475.2					892
YER075C	PTP3	Verified	1323.57	1442.95	55.4453		1656	77.9074			2066.01	1009.67	721.106	2359.34		1442.95		1811.18								768
YLR462W	YLR462W	Uncharacterized	1443.63	1443.63														1443.63
YFR038W	IRC5	Verified	2552.07	1444.31	122.176		998	182.499			1444.31			3072.25	9345.69	1562.21		1259.5
YGR091W	PRP31	Verified	1550.29	1444.38	67.1713		1894	99.4488			946.885			3759.91		1359.21		1529.56			1553.28					1260
YGL053W	PRM8	Verified	2118.74	1445.13	69.2116		5045	863.407						1233.71		2007.27		1249.32	3660.99		1640.26					1250
YLR189C	ATG26	Verified	1471.1	1445.94	61.9753		1403	339.939			1515.25		1470.02	2234.3		931.647		1421.87	3511.43		1487.54					396
YDR072C	IPT1	Verified	1152.75	1446	42.6887		1446									628.033		1489.11				1594.59				606
YPL017C	IRC15	Verified	2189.22	1446	98.8368	1416	1446	274.057			167.109								3394.14					2227.23		6400
YDR227W	SIR4	Verified	1971.9	1446.25	79.8687	1263	1818	198.951			4903.12	1827.64	1099.16	4290.37		900.638		1446.25
YNL024C	EFM6	Uncharacterized	1277.95	1447.57	55.753						329.668		1887					1135.13								1760
YGL094C	PAN2	Verified	2627.98	1449	133.976	1388	1274	340.084		167.65	2777.11		2050.25	2589.01	3724.17	1138.37		1237.47		13339.7						1510
YKL005C	BYE1	Verified	1697.77	1449.05	56.137	988	2852	480.422			2927.46		2544.2	1588.65		1309.45										892
YDR313C	PIB1	Verified	1410.04	1449.07	71.0869		2385	228.121	1660.67					575.172		539.086	2313.82	1237.47			1958.15				3007.91	195
YML065W	ORC1	Verified	2250.38	1449.26	76.0557	5592	1155	573.341			1652.84			2609.09		1245.68		1245.08								3930
YLR256W	HAP1	Verified	1375.49	1449.95	60.1677		884	129.089			2555.05		1784.91	1277.51		1622.38
YOR017W	PET127	Verified	1709.64	1450.72	84.7454		120	55.282			1366.83	4764.4		1020.01	3400.38	934.124					1534.62			2170.71		1730
YNL305C	BXI1	Verified	2063.17	1451.8	66.7836		4460		1339.6							1091.75					1451.8	1972.69
YIR007W	EGH1	Verified	1510.89	1452	44.3973		1452	401.036			1666.55		2089.12			2462.64		1434.92								1070
YGL166W	CUP2	Verified	1521.67	1452.52	67.5555			116.635	528.605							1094.97	2396.13	1453.23			1451.8				3371.97	1760
YDL080C	THI3	Verified	1500.26	1453.04	72.6287		1676	32.8577						501.305		1245.04		1126.82	3619.01		1661.04					2140
YLR442C	SIR3	Verified	1439.79	1453.05	60.5213		1598	298.496			2579.93		280.695	2485.34		486.536		1399.31			1506.09			2363.49		1400
YPL167C	REV3	Verified	1453.5	1453.5	124.881	2737	170
YPR186C	PZF1	Verified	1324.14	1454.83	60.293			213.184			1576.16			558.582		795.979		1787.51		2752.01	1529.65					1380
YGL185C	YGL185C	Uncharacterized	1720.3	1455.68	72.6289		1369	814.787		1749.73	374.244		1599.96	2167.97		4990.27		1225.64			1481.37					1430
YHR071W	PCL5	Verified	1456.89	1456.89	30.1022	1767												1146.79
YNL240C	NAR1	Verified	1382	1457	44.4496		1457	531.058			1157.42			1544.06		2220.45
YDR201W	SPC19	Verified	3017.06	1457.13	141.499		13043	270.186			2166.55	3314.2	747.714	284.35		3671.5										639
YOL033W	MSE1	Verified	1455.43	1457.33	76.2432		841	174.58		510.246	159.24			1638.44		1398.66		1911.05	3465.1		1516.01					2940
YMR006C	PLB2	Verified	2522.42	1457.92	92.3441		1352	3.50791				4977.94	5713.44		5108.24	837.363						1563.84				623
YLR190W	MMR1	Verified	1589.58	1458.1	61.1041		842	74.1178			1314.22			808.605			2207.83	2076.37	3372.77	2527.93	1601.98					1070
YHL036W	MUP3	Verified	1458.31	1458.31	30.8564													1140.12			1776.5
YLR057W	MNL2	Verified	1373.22	1458.76	71.9882		1259	485.929			2011.73			2752.57		1658.52										71.6
YLR001C	YLR001C	Uncharacterized	1725.42	1459.55	68.669		866	231.253			1214.25			1324.51		765.511	3020.44	1901.85	3707.45		2596.62	1594.59			3276.55	206
YOR266W	PNT1	Verified	1353.03	1460	43.0313		1342	212.453			1162.7			1749.56			2069.31				1475.2					1460
YLR457C	NBP1	Verified	1698.06	1460.13	82.9137		1450	58.8854						425.34					3503.39		1470.27			3061.06	3276.55	339
YJL133W	MRS3	Verified	1821.25	1461.6	61.7703			492.632						1461.6		3463.85				2328.16						1360
YIR009W	MSL1	Verified	1751.75	1461.7	70.2934		2763	245.083	1461.7		1208.61		693.507	2008.05		3372.25									3509.52	504
YMR293C	HER2	Verified	1893.82	1463	94.2056		1463	150.22			412.284			1716.96	5483.77	1886.82		1350.09							4095.27	486
YGR122W	YGR122W	Verified	2548.32	1463.17	126.738		3601	477.921			10153.3			1515.76	1119.62	376.441		1410.58			1731.92
YIL014W	MNT3	Verified	1542.88	1463.46	63.3642		930	265.12			1463.46			1694.26	3199.1	938.245										2310
YDR065W	RRG1	Verified	1245.15	1463.48	60.6095									180.461				1256.95						1873.17		1670
YHR061C	GIC1	Verified	1674.21	1464	82.1363		1828							267.134					3501.71							1100
YCL056C	PEX34	Verified	1464.66	1464.66	29.0812													1163.48				1765.85
YIR027C	DAL1	Verified	1762.57	1465	37.9792	1465						2529.18						1293.54
YDL159W	STE7	Verified	1666.29	1466.3	69.8908		1204	305.033	335.169		1137.9			2226.5		703.952	2342.45	1728.61	3830.69		2027.26				3481.9	672
YPL255W	BBP1	Verified	1816.02	1466.34	94.7737		5454	90.9841			1072.64						2060.29	1466.34			1645.92					922
YDL129W	YDL129W	Verified	1457.81	1466.6	56.6652		1626											1307.2		2448.02						450
YCL005W	LDB16	Verified	2072.74	1467.21	110.358		4602											1467.21								149
YOL003C	PFA4	Verified	1483.81	1468.28	80.5971			40.281				2958.4			1341.96							1594.59
YDR528W	HLR1	Verified	1886.3	1469.09	95.2357		507	11.6439								1469.09		1615.55	5750.31	2746.34	1449.34				3168.38	259
YLR358C	YLR358C	Uncharacterized	1469.81	1469.81	25.035													1209.62								1730
YPL024W	RMI1	Verified	1470.51	1470.51	2.83614													1441.02								1500
YKL087C	CYT2	Verified	1521.01	1470.81	71.5336			390.696		3256.28				1470.81		862.78		1624.47
YPR140W	TAZ1	Verified	2069.81	1471	97.3747		1471	39.5159			1396.5			1712.12		522.576			3403.35	6834.7		1908.55				1340
YMR283C	RIT1	Verified	1260.06	1471.5	78.551		1679	86.7456			725.005			2265.35		323.973		1541.92			1471.5				2988.01	259
YBL082C	ALG3	Verified	1692.61	1471.58	74.3226		3706	26.2779			1081.63			1705.18		473.367		1471.58	3659.43		1469.04	1640.94
YGL085W	LCL3	Uncharacterized	1438.47	1472.73	90.203			19.4221										1514.59	3481.58		1472.73					704
YPL258C	THI21	Verified	1739.85	1473.65	68.9071	1445	3425				1502.3		587.097
YPL076W	GPI2	Verified	1016.1	1473.97	82.9088			43.8845										1530.44			1473.97
YPL124W	SPC29	Verified	1874.1	1475.2	86.3038			242.137			835.942			904.025	5678.72	951.06	2319.64	1837.65		2622.52	1475.2
YNL046W	YNL046W	Uncharacterized	1812.76	1475.23	69.2631													1262.89	3596.58			1687.56				704
YBR233W	PBP2	Verified	2210.78	1475.87	105.225		3048	423.732			1475.87			1163.18	8136.69	1294.25		1228.17			1537.11					1590
YJL118W	YJL118W	Verified	1476.4	1476.4	30.1345	1791												1161.81
YMR159C	ATG16	Verified	1890.78	1477.67	93.2353		4938				801.427							1663.82			1477.67					573
YKL086W	SRX1	Verified	1915.66	1478.69	101.105		5519	107.176	1396.63									2372.39			1560.75					538
YLR119W	SRN2	Verified	2006.54	1478.86	66.1132		4387	1276.93			3219.46		1870.99	613.891		1478.86		1198.68
YCR015C	CTO1	Verified	2493.94	1479.46	142.276		2390	395.728		226.602	10341.1			1855.07		769.634		1479.46
YJL107C	YJL107C	Uncharacterized	1480	1480																						1480
YER047C	SAP1	Verified	1385.05	1480.42	51.3605		1785	261.544			1480.42	1953.04		1409.86		1190.48	2369.67				1715.42					300
YCL051W	LRE1	Verified	1085.77	1481	62.791		1481	127.697			1625.38			600.564				1594.19
YPL064C	CWC27	Verified	1819.1	1482.54	86.381		5381	314.051			1381.55		798.343	1780.64		953.705		1583.53								2360
YJR055W	HIT1	Verified	1829.3	1486.31	77.9262		4551	659.156			1262.33			359.658				1756.65			1486.31					2730
YNL195C	YNL195C	Uncharacterized	1170.05	1487.35	49.7839		1525						497.791					1487.35
YDL020C	RPN4	Verified	1487.35	1487.35														1487.35
YKR058W	GLG1	Verified	2240.66	1487.49	86.1568		5108	107.562			1487.49		3135.49					1364.73
YLR036C	YLR036C	Uncharacterized	1427.53	1489.11	75.1817			109.791										1489.11			1517.25				3054.49	967
YOR329C	SCD5	Verified	1784.9	1490.01	72.703	3617	4035	46.3305			1241.51		1274.39	498.605		1873.34		1685.36			1490.01				3168.38	704
YHL018W	YHL018W	Uncharacterized	2185.71	1490.51	109.587		3958	24.3071			50.5059		2229.02	216.425						6634.82					3620.59	752
YOL125W	TRM13	Verified	2911.75	1491.74	110.828	10247	1678	1068.19		933.446	1220.66			1953.97		6382.71		1491.74								1230
YPL250C	ATG41	Verified	1239.7	1492.49	56.3441													1776.61			1492.49					450
YKL149C	DBR1	Verified	1599.24	1492.62	72.1538			245.245						1727.79		3400.53		1492.62								1130
YBR194W	AIM4	Verified	1639.82	1493.67	68.7771		793	237.136			2163.61			1095.12		1843.78		1502.28	3998.57		1485.07
YNL101W	AVT4	Verified	1304.73	1494.37	45.1035		1775									644.809		1494.37
YPL214C	THI6	Verified	2181.07	1494.55	65.8087		1843	537.542		1099.89	1421.24	3619.08	1470.02	1494.55	1443.64	5469.88			3458.98					2133.98
YOR049C	RSB1	Verified	1495.25	1495.25														1495.25
YNL009W	IDP3	Verified	6960.95	1496.33	164		7763	41.2806			1376.5		29592.3					1428.83				1563.84
YDR079W	PET100	Verified	1512.38	1498.76	64.5599		1118	1141.36			128.838			1834.87		3275.4		1498.76		2566.76	1579.47					468
YLR079W	SIC1	Verified	2160.79	1499.24	76.3967		4682	387.105			1356.34			468.391		1022.6			4128.81	3828.37	1642.15				3324.17	768
YKR044W	UIP5	Verified	1134.04	1499.64	61.661											440.834		1499.64			1816.15	1594.59				319
YNR075W	COS10	Verified	1433.47	1499.91	67.7692									430.507							1499.91					2370
YCR024C	SLM5	Verified	1792.71	1501.13	69.9528		1667	156.988			975.594		1335.26	3936.56	2890.85	564.761				2494.78					3121.35	784
YFR039C	OSW7	Verified	1652.7	1501.34	56.4447	1269	1380	165.139			1695.79	585.562		3087.28		1501.34		1348.37			1527.17	2450.01				3170
YGR237C	YGR237C	Uncharacterized	1733.89	1502.81	65.7506		1799	516.889			3107.04	1003.61	1034.38	4066.15		1502.81		1525.15								1050
YNL188W	KAR1	Verified	8659.02	1504	157.959		1504	42.9209														24430.1
YGR140W	CBF2	Verified	1355.9	1504.86	51.9549		601	217.959			758.24			2051.29		1579.64		1776.61			1504.86			2363.49		1350
YKL064W	MNR2	Verified	1569.29	1506.09	65.4526		1336	326.721		2800.85	625.266			2271.88		441.545		1176.86		2544.55	1676.18	2184.05			3188.59	259
YBL107C	MIX23	Verified	1728.13	1506.15	68.8888		1665	225.836						1152	3397.26	1492.43		1519.87	3604.62							768
YNL068C	FKH2	Verified	1659.22	1507.33	50.2683		2498	250.785	2503.22		2900.42		1371.97	1444.7		1017.33	2315.06	1786.6			1507.33					656
YPR153W	MAY24	Verified	1509.31	1509.31														1509.31
YMR227C	TAF7	Verified	1421.45	1509.76	49.4732		1892	344.879			1907.64		693.507	2464.06		1316.79					1702.74					1050
YHR101C	BIG1	Verified	1663.12	1509.95	62.654		688	514.779			2627.76		1258.72			810.426					1761.19	2184.05				3460
YHR144C	DCD1	Verified	1883.35	1510	95.4818		1359	461.185						882.126		5851.89		1605.76			1513.53					1510
YLL032C	YLL032C	Verified	1651.35	1510	62.8679	2927	1510	363.915	871.516		717.696		649.981	3323.69		2826.03		2042.72			2010.27					922
YBR140C	IRA1	Verified	1586.81	1511.95	72.3367	197	1095	88.0877			2301.9			2789.08		684.8		1511.95						2377.62	3235.87
YDR443C	SSN2	Verified	1493.77	1511.95	78.0717	279	2619	129.08			2336.09			332.003		817.885	2075.44	1511.95		3343.51
YPR115W	RGC1	Verified	1916.21	1511.98	84.7516		5483	209.638			3531.64		965.39	1137.24		945.393	2197.29			2505.81				1886.72		300
YCR069W	CPR4	Verified	1423.49	1513.49	47.0992		1055	81.0938			2009.68			1166.2		1647.57		1379.41			1914.05	2134.89
YOR070C	GYP1	Verified	1639.82	1514.24	87.0851		4252	219.51			827.326			548.855		1514.24					2161.5	1579.2		3449.72		206
YNL309W	STB1	Verified	2150.22	1514.77	105.981		2775	47.41			1491.96			2029.32		878.284	2605.01		7691.2		1514.77					319
YDR492W	IZH1	Verified	1709.75	1514.89	52.0361						954.661			1057.75				1972.04		2854.55
YDL117W	CYK3	Verified	1444.27	1515	66.5174	708	616	161.384			2895.43		1939.45	2140.57		1224.11					1805.9			2574.85		377
YPL104W	MSD1	Verified	1405.46	1515.58	59.405		657	221.41	562.957		1481.17		944.779	3034.92		2072.86		1810.26			1719.22					1550
YFR008W	FAR7	Verified	2164.37	1516.11	126.269		9527	186.382			1186.54		570.325	880.105				1924.88			1845.68			1915.48	3121.35	486
YGL141W	HUL5	Verified	1636.2	1516.15	58.6236		1370	592.601			576.408		857.546	859.289	3092.75	2070.16		2160.96			1662.3					3120
YBR215W	HPC2	Verified	1775.59	1517.51	76.9317		4293	392.802			3151.42		1335.26	1901.52		1192.96		1699.75								238
YJR089W	BIR1	Verified	2917.73	1517.97	128.254		2141	116.888			1035.84	11233		1815.36		360.486		1220.57							5418.61
YHR151C	MTC6	Verified	1518.11	1518.11														1518.11
YAL022C	FUN26	Verified	2766.72	1518.59	150.539	12675	1268	14.6296			353.241			2731.59		1769.17						3105.15				217
YOL013C	HRD1	Verified	1434.78	1518.99	63.8047		781	39.4323			951.987	1758.47						1518.99		2333.57						2660
YFL034W	MIL1	Uncharacterized	1589.93	1519.72	53.4772		1101	76.9862			2536.61			1080.06		960.067	2393.73	1763.9			1519.72	1892.59		3054.53		1110
YMR210W	MGL2	Verified	1707.73	1519.74	49.7982		1319				1720.48	2498.74		666.117		2903.58		1138.46
YPR176C	BET2	Verified	1740	1520	72.1917		4076	112.876			482.656		891.231	2006.65		2578.46		1201.2				2790.89				1520
YAR064W	YAR064W	Uncharacterized	1520	1520																						1520
YDL006W	PTC1	Verified	2690.4	1520	104.792		9011	400.45	616.822		2209.54			1881.09	5657.28	1492.98		1424.48								1520
YLR032W	RAD5	Verified	1311.81	1520	51.4858		793	109.89			2159.75			1750.52		1278.39		1571.11								1520
YMR098C	ATP25	Verified	1359.66	1521.87	50.3583		1636	85.8697			761.805			1521.87		1071.47		1151.79			1672.39			1905.72		2430
YBR295W	PCA1	Verified	1522	1522	135.103	2976	68
YML098W	TAF13	Verified	1782.17	1522.39	60.5297		2007	786.402			859.318			1633.11		1411.66		1296.1	4183.74							2080
YDR185C	UPS3	Verified	1535.47	1523.39	56.6326													1523.39						2411.03		672
YJL161W	FMP33	Uncharacterized	1408.08	1523.83	92.3002		2646	54.4167						1523.83
YKL084W	HOT13	Verified	2267.37	1526.92	71.5988	5294	3424	468.637			1503.47	2356.4				1298.19		1526.92
YFR003C	YPI1	Verified	14856.8	1526.99	137.99		47394								23102.2	1526.99		1181.05								1080
YNL106C	INP52	Verified	1332.13	1527.72	47.7267		1532	392.69			1818.25		944.779	2118.03		527.581		1800.25			1523.45
YNL126W	SPC98	Verified	1931.87	1527.81	93.403		818	78.8429			874.007		1833.1	1527.81		1071.12	2933.93				1674.29			5095.19	5287.39	56.9
YLR214W	FRE1	Verified	3006.02	1528.4	128.848		545	3989.96			881.813	12191		2491.6		1600.96		1455.85								892
YBR104W	YMC2	Verified	2974.63	1528.96	130.758		1453	88.6465		3978.56	597.367		1015.14	4713.3		1604.93					2001.13				13244.3	1050
YDL098C	SNU23	Verified	1784.67	1529.65	69.0519	985	4735	316.131			1606.31			1858.46		1095.49		1303.78		3203.74	1529.65			2090.78		907
YNL253W	TEX1	Verified	1587.9	1530	54.2356		1530	328.061			2776.37		1099.16	2589.7		1651.86		1140.12
YDL157C	YDL157C	Uncharacterized	1737.32	1532.21	44.037			1102.74			2174.95			2100.84		3039.35		1532.21			1459.18					752
YIR023W	DAL81	Verified	1485.58	1532.57	68.6392	324	2969	92.9816	431.99		1861.34	2910.33		1395.05		811.28	2591.63	1670.1			2065.26					704
YPL153C	RAD53	Verified	2094.67	1533.17	98.6223		2563	180.842	930.082		1969.35			1147.78		1552.81					1513.53					6900
YDL217C	TIM22	Verified	1459.06	1533.17	78.695		2607	162.908						2221.07		845.277
YLR272C	YCS4	Verified	1440.51	1533.2	63.816		507	168.744			2582.27			1990.05		669.607		1551.64			1514.77					2540
YLR362W	STE11	Verified	1611.02	1533.36	43.6516	1090	1254	583.855	1165.57		2423.09		1939.45	2783.67		1329.97		1736.74			1817.43			2472.43		736
YER118C	SHO1	Verified	1484.87	1533.93	62.5593		273		587.265					1143.31		639.27					2529.67	1924.55		2451.88		2330
YDR325W	YCG1	Verified	1578.46	1534.62	55.1885		1307	102.757			2340.74			1158.15		963.519		1704.26			1534.62			3175.09		1920
YIL150C	MCM10	Verified	2141.85	1535.5	124.368		470	60.7762			1504.02			7389.33							1566.99					1860
YPR185W	ATG13	Verified	1592.5	1535.74	85.5385		3693	210.503			1818.7	3666.21		1438.35		158.715		1535.74			1662.3					149
YDL048C	STP4	Verified	1536.88	1536.88	84.0939															2450.76						623
YMR087W	YMR087W	Verified	1527.94	1536.92	63.2409		1701	300.868			1372.83		2828.89	641.749		2322.3
YOL081W	IRA2	Verified	1928.51	1537.11	71.4038	4570	1229	64.867	902.332		1848.15		3917.07	1387.6		812.347		1870.61			1537.11				3074.51
YDR375C	BCS1	Verified	1515.4	1538.35	57.2942		2448	146.852		575.088	2491.32		477.992	2351.2		1087.26		1218.89		2344.4	1538.35					1990
YPR054W	SMK1	Verified	1538.62	1538.62	32.4805		1892											1185.24
YNL022C	RCM1	Verified	2016.83	1539	67.2152	395	1539	1027.46			2397.45		2386.38	3814.98		4385.93		1283.31								922
YHL024W	RIM4	Verified	1664.56	1539.06	75.2001	3185					395.121	2149.77			928.354
YMR052W	FAR3	Verified	3232.48	1540	136.236		3373	721.399			1160.66			1354.34				1165.15			1867.56	14721.6			3188.59	1540
YDR478W	SNM1	Verified	1707.32	1540.09	75.414		3887	164.5						1358.22		1433		1922.11			1647.18				3074.51	172
YLR139C	SLS1	Verified	1585.54	1541.31	67.2022		1771	267.265			438.273			2145.14		1541.31		1505.79								3430
YPL272C	PBI1	Uncharacterized	1542.19	1542.19	16.34	1364							1720.37
YGL251C	HFM1	Verified	1543.09	1543.09	57.2884		918				2168.18
YML064C	TEM1	Verified	2201.4	1543.17	91.4864	1637	5170	269.148						1754.92		5539.74		1218.04			1449.34					573
YCR067C	SED4	Verified	1501.87	1544.88	60.9759		1745	516.607			1693.88		985.581	1395.88		328.75					2227.87				3121.35
YBR211C	AME1	Verified	1540.91	1545	83.6887		1545	207.011			57.4254			229.842				1173.51	3554.27		2209.25			3261.88		1630
YOL044W	PEX15	Verified	1954.65	1545.54	77.9714		654				4073.53											2021.08				1070
YLR205C	HMX1	Verified	6086.29	1546.42	133.811									1546.42	15488.5			1223.95
YMR106C	YKU80	Verified	1341.1	1547.52	72.2953		1551	162.922			1544.04					690.616		1590.64			1595.72				3235.87	358
YDR283C	GCN2	Verified	1811.62	1548.2	70.9078	780	1231	159.63	657.722		2782.1		3404.91	2223.76	4426.19	1548.2	2952.11	1575.55			1530.89					279
YBL081W	YBL081W	Uncharacterized	1878.2	1548.82	94.9276		4852	60.2552			1548.82					1706.85		1223.1
YNL286W	CUS2	Verified	1709.54	1549.87	64.2953		3847	143.148			1885.94			1492.02				1549.87			1688.82					1360
YML081W	TDA9	Verified	1279.47	1549.87	71.3098		1847	127.355			2134.32			2354.55		271.22		1549.87								672
YHR149C	SKG6	Verified	1766.92	1550	67.0431		2785	204.586			3532.58			1509.16		547.267					2239.86					1550
YKR078W	YKR078W	Verified	1440.56	1555.77	48.668		1160	231.255			1688.24			2570.23				1608.43			1555.77					1270
YIR024C	INA22	Verified	1562.16	1556.15	51.4452		2845	567.936			1883.29		2273.79	1885.66		1223.57		1229.01								589
YOR060C	SLD7	Verified	2167.34	1556.81	108.132	5512		43.7564										1423.61								1690
YFL050C	ALR2	Verified	1557.5	1557.5	51.9831	985																				2130
YNR074C	AIF1	Verified	2512.86	1560	94.216		5724	630.637	377.053		4272.62															1560
YLR240W	VPS34	Verified	2710.73	1560.71	120.047	517	968	314.828			1603.32			649.06	9236.1	1341.46	2571.16	1518.11			1880.45	2004.92		10989.2	3276.55	1080
YLR382C	NAM2	Verified	1526.39	1560.75	52.7351		1087	281.694		650.763	1254.64		1708.7	3222.27		1118.35	2207.89	1578.21			1560.75					2120
YDL017W	CDC7	Verified	1448.05	1561.72	71.8651		561	147.125			722.455			3684.58		478.827	2075.93	1665.62			1523.45			2021.54		1600
YER140W	EMP65	Verified	1562.21	1562.21	0.244608													1564.91			1559.51
YMR144W	FDO1	Uncharacterized	1345.94	1563.37	50.9432		1027	142.409			1659.52			1498.41							1628.32					2120
YHR160C	PEX18	Verified	1563.84	1563.84																		1563.84
YOL011W	PLB3	Verified	1984.2	1563.84	89.9692		1208	36.9739			3519.22		477.992		5534.63	604.967	3276.3				1635.86	1563.84
YGR065C	VHT1	Verified	2436.11	1563.84	79.8973			88.3893			1461.65			1338.05		514.572	5570	3525			5094.98	1563.84		2768.48
YDR240C	SNU56	Verified	1585.73	1564.02	76.6946	3900	1751	146.311			561.645		497.791	1829.16		1948.25		1564.02	3428.3		1455.49					361
YLR016C	PML1	Verified	1429.14	1564.49	73.0145			35.9474						255.33		1986.64		1570.23			1564.49				3121.35	1470
YDR183W	PLP1	Verified	1481.99	1565.44	43.314		2366	708.04	945.177		1499.27		773.431	2166.31		827.827		1631.61			1652.22					2250
YBL086C	YBL086C	Uncharacterized	1798.61	1566.99	65.7697		1498	283.969			1774.24			1811.7	3835.04	969.331	2312.47	1448.87	3888.15		1566.99					396
YPL020C	ULP1	Verified	1609.97	1566.99	64.3486		2479	203.691			2867.69		2473.68	2508.23		522.576		1490.86			1566.99					377
YNL127W	FAR11	Verified	1390.26	1567.35	70.4117	306	3208	280.476		157.097	1792.12			2431.12		345.171		1576.43			1558.26	1718.79		2229.6		1080
YDR180W	SCC2	Verified	1407.06	1567.41	73.4074		611	153.779			1409.83			1815.77		339.574		1725						1891.54		3310
YMR102C	YMR102C	Uncharacterized	1583.96	1567.48	55.8962		2628	481.439			2646.99			2311.86		930.438		1560.48			1574.47					538
YNL176C	TDA7	Verified	2064.07	1568.83	66.9638		1022											1460.22	4096.61		1677.45
YJL070C	YJL070C	Uncharacterized	1558.2	1569.13	56.7983	423	1969	191.772			2065.23			698.814		1244.88	2061.41	1611.1		2664.55	1527.17				3141.48	1100
YDR489W	SLD5	Verified	1397.61	1572.48	45.43		1846	348.616			1298.97			1035.11		1997.34		1859.61
YKL105C	SEG2	Verified	1694.88	1572.68	66.3983		2601	139.361			2521.04		1470.02	1636.93		330.537		1508.43	3439.31					2764.15		538
YAL024C	LTE1	Verified	1191.01	1572.89	75.4355		1761	180.023	160.188		1849.15			1939.19		486.455		1572.89						2466.2		304
YHR022C	YHR022C	Uncharacterized	1574.55	1574.55				1574.55
YDL054C	MCH1	Verified	2310.67	1574.66	105.824			12.0803								312.971	3978.68	1574.66			5674.96
YNL095C	YNL095C	Uncharacterized	2057.61	1575.01	113.6	5059	398	21.4107												2752.01
YPR109W	YPR109W	Uncharacterized	1575.15	1575.15	32.6674		1939											1211.3
YDR216W	ADR1	Verified	1853.92	1576.43	84.1303		984	126.684			5225.49			691.337		886.753		1576.43		3254.1		2004.92		1935.59
YOR005C	DNL4	Verified	1577.07	1577.07	40.0775	2024												1130.14
YNL199C	GCR2	Verified	2081.62	1578.17	92.064		1902	370.185			2700.42			1578.17	6061.06	684.683		1274.79
YLL052C	AQY2	Verified	1579.2	1579.2																		1579.2
YIL169C	CSS1	Verified	3007.2	1579.2	135.163		1660	72.481					10181.6	1542.67								1579.2
YKL065W-A	YKL065W-A	Uncharacterized	1545.52	1579.2	84.1488								2828.89	228.469								1579.2
YNL237W	YTP1	Verified	1579.2	1579.2																		1579.2
YOR389W	YOR389W	Uncharacterized	1579.52	1579.52	57.3453		2220				939.035
YMR028W	TAP42	Verified	1721.49	1580.32	71.4427		2085	1224.52	382.842	464.754	3314.36		798.343	3566.01		1936.12
YLR188W	MDL1	Verified	1691.12	1581.59	50.9014		989	298.801	2170.56		1581.59		3480.47	1428.02	2006.8	2461.68		1172.68						1972.72		1040
YDR473C	PRP3	Verified	1592.44	1581.97	67.6327		1496	326.411			1870.22			1727.38		1202.77		1638.76	4056.46		1581.97					432
YDR329C	PEX3	Verified	1893.38	1582.64	65.4097		858	169.542						1437.87	4891.21	1177.57	2280.26	1582.64		2914.85	2045.59	2069.7				1400
YPR057W	BRR1	Verified	1447.2	1583	52.3874		1554	91.8897			1091.41			2716.8		1005.39		1636.08			1612.01					1870
YKR055W	RHO4	Verified	1691.78	1583.1	62.2196		3716	130.31			1651.14	1515.06		1042.81		2413.52		1220.57				1844.85
YER010C	YER010C	Verified	2849.09	1583.86	103.047		9450	899.961			1742.44	864.347		1425.28	3681.89	3882.83										846
YNL146W	YNL146W	Uncharacterized	1584.11	1584.11	4.63976													1636.08			1532.14
YGR179C	OKP1	Verified	1627.91	1585.95	74.6751		3850	125.64			1146.37			1548.32		297.252		1623.58			1742.09					2690
YGL180W	ATG1	Verified	1822.97	1587.54	64.5579		3598	333.725	1050.2		1638.75		1536.33			478.428	2520.37				2392.71			3611.14		1070
YMR282C	AEP2	Verified	1772.66	1587.97	68.5384		425	193.09			865.635	1424.61		2739.7		748.018		1587.97	3427.51		1657.26			3750.49		2680
YNL003C	PET8	Verified	1562.68	1589.45	66.4694		1968	97.0076						1589.45		2590.63		1229.01		2943.68						521
YNL020C	ARK1	Verified	1795.44	1589.75	50.3289		3148	346.183			1257.84			1304.1		913.098		1589.75			1795.66	1908.55		2795.2	3141.48	1550
YJL006C	CTK2	Verified	1893.41	1590	62.895			181.884			1075.65			2800.8		1335.8				2586.24				3683.53		1590
YGR102C	GTF1	Verified	1875.77	1590.4	70.8456			598.855		3833.01	1427.27			1519.76				2020.35			1661.04			3773.86		172
YDR392W	SPT3	Verified	1700.21	1593.04	61.6944		3371	105.695			992.572			1476.07	1353.03	707.111	2143.76				1798.22				3344.64	1710
YNL329C	PEX6	Verified	1567.17	1593.51	54.1286		2117	114.053			2004.87			1245.46		444.597		1550.75		3115.4	1557.01	1892.59				1630
YJR001W	AVT1	Verified	2022.64	1596.39	73.6993		4585	38.5765					1536.33	1355.71		3925.31		1263.74				1656.45				1820
YMR223W	UBP8	Verified	1596	1596.97	34.3495		1402	544.992			1542.3		2025.58	2147.26		2211.62		1863.28			1596.97					1030
YGL013C	PDR1	Verified	1648.27	1597.3	40.0893		1000	900.834	553.348		2526.27	2252.85		2234.11		1357.49	2573.02	1703.36			1491.25			1886.72		1300
YKR103W	NFT1	Verified	1612.41	1599.36	70.6087		243											1418.4			1780.33				3007.91
YGL032C	AGA2	Verified	1387.95	1599.48	57.9606			131.482			2251.45										1599.48	1797.36				1160
YBR071W	YBR071W	Verified	1756.96	1599.78	66.8643		3380	190.692			1528.57			795.101				1671	3567.25		1723.03					1200
YLR284C	ECI1	Verified	2320.97	1599.96	98.603		6807	141.887			3837.78		1599.96	996.768		986.729						1876.65
YJR118C	ILM1	Verified	1616.72	1599.96	37.7686		1966	1399.8			2055.11	469.987	1599.96	1975.17		1703.52		1127.65		2823.11	1503.62					1160
YMR060C	SAM37	Verified	2155.6	1599.96	62.8733		3514	415.652		2809.69	974.422		1599.96	2797.71		4582.18		1126.82								1580
YJR092W	BUD4	Verified	1773.41	1600	76.7779	2369	1071	330.728			4484.31					875.075					1683.76					1600
YLR253W	MCP2	Verified	1587.48	1600	80.8826		737	74.0617			179.501		403.699	1700.69	4239.99	1004.64	2824.95				2418.37			2279.36		1600
YHR154W	RTT107	Verified	2047.45	1600.36	70.6335	378	1361	716.894		68.022	3676.02	1353.93	4398.01	4923.79		2535.03	2510.05	2162.85			1590.72	1610.01				1380
YLR427W	MAG2	Verified	2309.83	1600.89	111.876	9388	1102	228.83			1436.06		2550.16	2300.82		1239.23		1765.72			2165.47					922
YMR182C	RGM1	Verified	1895.01	1601.37	70.538			34.934										1681.77	3489.33		1520.97				3413.09	1230
YPR141C	KAR3	Verified	1684.37	1601.75	65.7083		760	153.362			2114.94			3120.2		872.974					1547.05	1656.45				3250
YDR362C	TFC6	Verified	1546.43	1602.65	53.98		2436	132.931			1487.52			637.038		1185.53		1717.78		2981.28	1737			2019.26		1130
YHL027W	RIM101	Verified	1396.95	1602.66	57.9969		2218	36.2467			1108.98			1385.31		457.073	2121.39				2028.57					1820
YBR007C	DSF2	Verified	1470.67	1606.99	69.0918		1350	80.9471			1658.29	2081.98		3551.46		893.3		1636.08			1606.99					377
YPL119C	DBP1	Verified	2143.81	1608.25	91.2624		7508	171.251	944.294	2344	1164.25		1980.44	1053.49		3251.58		2076.37			1608.25					1480
YCL016C	DCC1	Verified	1781.05	1608.25	58.2684		2273	556.95		1508.67	1664.95		315.836	1373.27		3811.16		1495.25			1608.25				3324.17	1660
YHR109W	CTM1	Verified	1574.58	1608.34	66.2509			54.1321		1608.34				1345.2		1925.25										2940
YKL015W	PUT3	Verified	1799.84	1609.08	82.8396		257	3.39938						3248.61		440.834	2260.74	1524.27	3744.77		1693.88			4088.87		736
YJR082C	EAF6	Verified	2341.75	1609.68	117.416		8904	639.13			1419.11			910.43				1800.25		2715.24	1841.82					504
YPR178W	PRP4	Verified	2202.14	1610.5	76.7189		1451	275.039			2847.75	3590.43				801.847		1422.74	5458.33							1770
YLR251W	SYM1	Verified	1496.49	1610.67	35.3756			1351.33			1954.21					810.426										1870
YOL146W	PSF3	Verified	2002.47	1611.56	83.0988			289.603			326.053	4529.7		1611.56		3892.75		1157.63								2210
YLR237W	THI7	Verified	1832.36	1611.91	72.8381		1352	533.697						1611.91		444.494		4093.29			1671.13					3120
YDR079C-A	TFB5	Verified	5563.74	1612.07	181.956		30466	1406.65					898.915	1163.59		4182.26		1620.9			1603.23				3168.38
YJL165C	HAL5	Verified	2445.91	1612.4	68.4434		3496	930.476	1150.58	573.641	4455.73	4299.53	1612.4	2854.58	5229.79	1114.56		1187.76
YJR100C	AIM25	Verified	1868.75	1613.44	48.9632		3138				1301.36			1110.12		1925.52
YDR139C	RUB1	Verified	2687.57	1613.86	113.44		9978	1705.52		383.74	3237.24			1858.07				1505.79			1522.21					1310
YEL050C	RML2	Verified	3558.13	1613.98	187.454		2097	290.009		669.412	1647.96		1661.23	2755.2	22438.1	1076.8		1365.59								1580
YKR029C	SET3	Verified	2092.6	1614.28	77.7336		2790	318.638			5683.06		1350.06	1445.68	3880.54	1190.66		1861.44			1782.88					623
YOR062C	YOR062C	Uncharacterized	1633.25	1615	31.6414		1220										2145.36	1157.63								2010
YKL092C	BUD2	Verified	1911.42	1615.02	58.0515	1567	973	234.364			3228.37	1663.03		1929.47		1356.75		1349.23	3703.64		1884.32			3817.87		1230
YOR188W	MSB1	Verified	4234.3	1616.26	199.145	25028	1403	177.937			1753.18			2046.09		1479.35					1814.87					172
YJR152W	DAL5	Verified	1616.8	1616.8	37.4546	2045												1188.6
YER028C	MIG3	Verified	1618.11	1618.11	35.2599													1214.67						2021.54
YLR454W	FMP27	Uncharacterized	2230.33	1619.53	70.7569		1128	156.708			4846.46		4746.54	2202.9		747.598	2407.5	1544.57			1619.53			3773.86		1360
YNL222W	SSU72	Verified	3209.8	1619.91	81.8258		6585	569.207			1619.91	6595.4		1372.59		4509.31		1217.2
YML111W	BUL2	Verified	2031.89	1621.51	77.3167		1264	259.437	481.02		3219.36	1621.51	4937.94	4300.43		2499.26		1923.96			1504.86					339
YBR043C	QDR3	Verified	2926.21	1623.53	168.471		280	31.9832			1623.53						2748.44	1637.87			13882.6					279
YGR271W	SLH1	Verified	1804.06	1625.45	61.937		1106	657.744	929.908		3677.55	901.41	1210.55	2060.03		3739.64	2672.9	2166.63			2040.35					486
YPL120W	VPS30	Verified	1641.45	1625.46	51.037		2649	284.239			1843.67			1169.23		633.412				2508.58	1569.48	1625.46				2490
YCR042C	TAF2	Verified	1844.23	1626.77	55.7154		1716	222.546			3211.1		1483.51	3294.25		1537.53		2128.93								1160
YGR058W	PEF1	Verified	1416.73	1627.28	68.8901		1185	389.258			82.7481			242.124		2013.72		1814.82			1624.55	1908.55			3276.55	1630
YJL116C	NCA3	Verified	1305.07	1628	86.2141		1628	53.761														2233.44
YDR371W	CTS2	Uncharacterized	2276.53	1628.3	96.6096		1717	376.911			799.708		516.853	1742.39		1527.23			3717.12		1539.59				7778.5	3050
YBR204C	LDH1	Verified	2355.89	1629.41	80.0858		2803	1048.02			1078.34			2018.81		5947.2		1240.01
YML096W	YML096W	Uncharacterized	1848.12	1629.95	58.1393		1147	262.317			1305.86			2793.29		2266.59		1644.12			1615.77					3750
YDR364C	CDC40	Verified	2045.06	1630	80.4079		1255	207.32			3394.12			1063.72		1696.03			5069.21							1630
YDR137W	RGP1	Verified	1616.11	1630.1	51.4254		2078	439.222			1650.07			1910.31		1190.44		1669.2	3430.18		1610.13	1594.59				589
YLR191W	PEX13	Verified	2074.11	1630.67	104.005		1363	256.368	723.892		2583.88			1659.36		842.495		1707.86			1601.98	2102.24				7900
YBR167C	POP7	Verified	2298.72	1630.72	94.6053			913.141			1017.66			1705.39	7125.1	1449.9		1630.72						2249.1
YPR071W	YPR071W	Uncharacterized	1157.83	1630.83	75.8347									144.702				1697.95			1630.83
YGR125W	YGR125W	Uncharacterized	1693.94	1631.46	52.5102	581	1545	297.388			1753		1777.6	2309.68		1631.46		1575.55			3721.53	2021.08				1420
YLR103C	CDC45	Verified	1317.43	1632.09	80.1159		450	38.4355						77.4103				1693.46			1570.73			1878.15	3101.25	1730
YPL007C	TFC8	Verified	1882.02	1632.26	61.7462		1335	252.119					1470.02	1621.5	4579.6	1632.26		1662.93			2314.71					2070
YGR274C	TAF1	Verified	3531.78	1633.35	126.99	1338	1414	316.481			4525.5		4219.35	3812.1	16429.3	1594.44		2067.01			1633.35					1500
YIL158W	AIM20	Verified	1144.96	1633.4	85.7464			14.78										1633.4			1786.71
YOR246C	ENV9	Verified	1700.13	1634.32	53.5707		1928	460.001			1040.49			2288.44		2340.63		1340.63							3235.87	967
YER033C	ZRG8	Verified	1375.66	1634.59	53.9472	1910	2200	32.2095			1634.59			1704.85		776.334		1371.63
YGL089C	MF(ALPHA)2	Verified	1635.67	1635.67	29.1385													1298.66				1972.69
YIL061C	SNP1	Verified	1711.49	1637.12	65.2013		3754	270.785			1577.49					2202.06		1802.98			1637.12					736
YOR373W	NUD1	Verified	1573.08	1638	54.3691	2546	1638	206.84			2875.17			705.755		724.201	2410.92	1599.53			1796.94			1908.57		892
YOR147W	MDM32	Verified	3181.93	1638.38	129.727			12.1176										1435.79		2423.37	1638.38					10400
YPR047W	MSF1	Verified	1928.56	1638.38	74.5169	901	1034	287.517	485.049	1153.8	2989.8		1691.05	5694.99		2642.26		1611.99			1638.38				3141.48	1800
YJL141C	YAK1	Verified	2721.58	1639.1	94.032	1746	5243	637.249	885.882		2075.9	1309.08	798.343	4502.71	8485.45	1532.21
YOR202W	HIS3	Verified	6707.32	1639.69	157.218					22509.3						1040.62		1179.38								2100
YLR138W	NHA1	Verified	1710.43	1640.94	59.2458		929	140.112			2350.45			807.411		555.651				2987.08	2384.62	1640.94		2418.12	3121.35	1480
YAR028W	YAR028W	Uncharacterized	1670.88	1641	71.3524		1641	155.769			1728.24			380.518		1170.64		1504.03			2377.88				4239.87	1840
YEL062W	NPR2	Verified	1565.66	1642.57	79.1943		1973	171.206			2197.03			1642.57		915.676			3741.14							319
YOL103W	ITR2	Verified	1392.88	1643	68.1726		2583	33.0621			1643		2360.86			955.667					1706.54					468
YBR060C	ORC2	Verified	1616.74	1644.8	52.3392		754	132.583			1985.67			1589.59		1375.75		1445.38	3371.79		1811.02			2001.59		1700
YPR066W	UBA3	Verified	1726.85	1646	75.3059	2986	1646	175.76																	3074.51	752
YDL045W-A	MRP10	Verified	1758.8	1646.23	65.8871			404.126	1667.91				2317.72	1548.47		1624.54	2348.6			3900						259
YGL128C	CWC23	Verified	1727.49	1647.44	65.2576		1931	3.96136			1210.14					2754.71		1363.87							3101.25
YEL009C	GCN4	Verified	1937.33	1647.79	86.3047	4615		17.0756						639.459				1560.48		3056.89	1735.1
YLR086W	SMC4	Verified	1672.54	1649.69	60.824	1781	1564	250.525			3215.29	1318.51	3342.97	1649.69		562.102	2422.91				1717.95					573
YHR110W	ERP5	Verified	1846.62	1650.56	47.8258		1389	601		3007.06	852.007			1552.21		2847.92		1747.6		3168.32	1644.67	1656.45
YJR008W	MHO1	Verified	1692.89	1651.18	68.9769		3131	394.184			1052.03		3573.08	1751.43		1696.6		1605.76								339
YPR094W	RDS3	Verified	1724.93	1651.28	23.9124		2016	1606.41						2210.03		1651.28		1140.96
YMR289W	ABZ2	Verified	1824.54	1653.79	62.5476		1804	253.038		3279.49	1548.9		1649.15	3635.32		1658.42										768
YKL012W	PRP40	Verified	1644.21	1655.76	64.3364		1496	372.463			3035.07		587.097	3323.32		534.289	2098.73	1655.76			1695.15
YJL059W	YHC3	Verified	1656.45	1656.45																		1656.45
YKL061W	BLI1	Verified	2281.14	1658.23	86.0823		6806	626.359			1658.23			356.187				1366.46		2605.76	2361.73				3509.52	1240
YBL090W	MRP21	Verified	2406.99	1661.92	91.4934		1798	395.004	1661.92	806.469			6365.37	4552.17												1270
YJL073W	JEM1	Verified	1893.23	1662.67	74.3542	5082	1355	154.477	444.399		1699.88			2043.84		2103.9		1243.39				1625.46				3180
YBR119W	MUD1	Verified	1870.99	1663.93	59.0257		3607	548.139	874.967		781.9			1685.87		1663.93					1625.81				3101.25	2950
YMR077C	VPS20	Verified	2879.67	1664.72	101.026		9393	126.429			1095.01			2076.2		5334.37		1664.72			1529.65				3760.68	937
YNL164C	IBD2	Verified	1651.84	1665	53.7438		1665	176.805			1757.54			1336.56				1784.78			1633.35				3208.83
YMR097C	MTG1	Verified	1737.99	1665.17	53.8054		1206	84.5756			1700.34			1223.39		2973.13				2589.02				2497.44		1630
YGR046W	TAM41	Verified	1487.28	1666.25	64.3186		1091	108.575						1810.3				2178.91		2325.45	1522.21			2666.79		195
YKR021W	ALY1	Verified	1634.92	1667.09	56.2924		1699	169.691			1192.2		2273.79	1406.23		824.05	2617.67	1635.19	3407.72		1965.95			2013.49		414
YDR034C	LYS14	Verified	1704.93	1667.15	100.395		1794	107.817			1667.15			989.22	5851.97	508.013		1982.24			1993.95					450
YBR107C	IML3	Verified	1940.29	1671.36	91.3004		2139											1203.72	4293.43							125
YMR247W-A	YMR247W-A	Uncharacterized	1671.99	1671.99																		1671.99
YAL014C	SYN8	Verified	2033.67	1671.99	64.2426		2395	1022.1	874.575	1500.29	1539.58		2605.11	1183.14		5614.89					1855.97	1671.99		2107.71
YPL171C	OYE3	Verified	2339.79	1672.35	93.9981		1617						5529.49	484.983				1727.71
YLR361C	DCR2	Verified	1722.54	1672.42	77.9384	658	963	252.828			4287.46			1672.42		2284.06										1940
YDR244W	PEX5	Verified	1704.71	1677.25	62.0565	545	1555	223.392			3420.04			1345.05		918.841		1833.99			1799.5	3336.27				2070
YLR306W	UBC12	Verified	1808.9	1679	46.5029		1679	590.523				2361.82				2801.17		1611.99
YPR002W	PDH1	Verified	4317.31	1679.97	187.776		898	137.323		25797.6	1870.41		3135.49	1602.38		1004.63		1679.97								2730
YBR163W	EXO5	Verified	1766.71	1680	67.2061	2666	1940	8.96502										1171.84	3393.48							1420
YBR158W	AMN1	Verified	1607.03	1682.46	78.7703	3041		22.1927										1344.93								2020
YGR206W	MVB12	Verified	2755.18	1683.23	127.099		12276	307.282				1545.28		444.609		3342.09	2396.76	1630.72			1735.73				3121.35	752
YLR385C	SWC7	Verified	1796.49	1683.7	84.2667			204.412			993.621					1683.7						1860.73				4240
YGL237C	HAP2	Verified	1629.01	1685.36	44.9682		1831	193.643			1697.6			1122.57		1673.11	2592.87			2309.24	1612.01
YJR056C	YJR056C	Verified	1674.9	1685.36	13.1659													1685.36			1449.34					1890
YNL165W	YNL165W	Uncharacterized	1686.37	1686.37	113.852	3044										328.75
YDR110W	FOB1	Verified	1734.2	1686.64	62.2266		2083	252.199			911.654			1004.23		754.749	2856.37	1863.28	3823.97		2282.58					1510
YNL097C	PHO23	Verified	1785.81	1687.5	58.7487	764	1374	232.54			1500.77	1687.5		1060.84		572.422	2302.34	2207.3		2561.2	1843.1				3859.56	3250
YPL005W	AEP3	Verified	1159.12	1687.56	84.4333			29.8086													1687.56					1760
YOR079C	ATX2	Verified	1687.56	1687.56																		1687.56
YNL145W	MFA2	Verified	1687.56	1687.56																		1687.56
YPR194C	OPT2	Verified	1687.56	1687.56																		1687.56
YMR268C	PRP24	Verified	1854.45	1688.06	78.7812			226.799						2820.71		481.916		1688.06	3855.81						3235.87	672
YDR140W	MTQ2	Verified	1878.58	1689	63.9015		1689	309.261						941.268		3385.96		1142.62			2291.94					3390
YAR027W	UIP3	Verified	2609.99	1690	82.0232		1609	739.698			2112.34			1555.61		7848.38		1357.84	3408.64						3168.38	1690
YDR219C	MFB1	Verified	1535.74	1690.09	53.4719		1870	89.1235			2622.24			1630.16		392.455	2222.44	1945.2			1690.09					1360
YNL250W	RAD50	Verified	2042.3	1691.48	82.1571		893	432.531			6078.04			3061.78	2790	720.283	2234.39	1832.16			1550.79					830
YDR067C	OCA6	Uncharacterized	2052.36	1691.66	67.1299		3341	700.348			1354.17			1136.3	5152.19	1335.8	2050.7	1691.66			1709.08
YLR102C	APC9	Verified	8075.97	1694	142.791		1694								21387.9			1145.95
YKR020W	VPS51	Verified	3219.87	1695.65	158.805		18363	337.062			3498.5		2778.24	1695.65		1205.05		1413.18		2497.54	1450.57	1860.73				319
YGL079W	KXD1	Verified	2306.95	1697.25	88.3279		6692	25.0593						797.075				1679.08			1715.42			2572.35	3344.64	1630
YNL311C	SKP2	Verified	1567.67	1697.95	79.4119		2084	145.948						3371.07		515.406		1697.95			2727.32					432
YFR042W	KEG1	Verified	1698.92	1698.92	1.65427											1679.04						1718.79
YMR132C	JLP2	Uncharacterized	1934.63	1700.21	56.1756			344.43			839.47			2771.58		1469.09		1550.75			1700.21			1915.48	3760.68	3060
YNL326C	PFA3	Verified	1707.45	1700.57	22.322											1488.39		1298.66			1912.75					2130
YNL053W	MSG5	Verified	1650.82	1701.56	61.7334	1806	506				468.963						2149.8	1701.56	3423.65	2622.52	1640.89					538
YML053C	YML053C	Uncharacterized	1804.02	1701.56	66.6582													1701.56							3054.49	656
YPL132W	COX11	Verified	1902	1701.84	73.065		1059	421.882		936.683			2436.64	4213.11		2344.68
YBR219C	YBR219C	Uncharacterized	1703.16	1703.16																		1703.16
YBR225W	YBR225W	Uncharacterized	1665.93	1703.54	54.5882		1981	224.475			1628.03		913.017	2844.35		1481.15	2114.66				1779.05			3070.59		623
YPL138C	SPP1	Verified	1493.91	1704.05	34.6989		983	449.183			1914.07			1485.1		1843.98		1867.86			1728.11					1680
YAR008W	SEN34	Verified	1806.27	1704.26	36.7987			1272.56			1358.28			2932.96		1763.31		1704.26
YGR268C	HUA1	Verified	1487.07	1704.3	71.2		1632	84.5435						480.079				1776.61			1941.26				3007.91
YNL221C	POP1	Verified	1799.26	1705.03	58.2409	332	1729	353.596			2679.96	3605.53	1702.84	2572.45		1707.21		1378.54			1475.2				3208.83	846
YCR026C	NPP1	Verified	1621.49	1705.3	80.5883		288	41.9832			2296.55		747.714	2850.87		1705.3										3420
YMR104C	YPK2	Verified	2866.45	1707.86	109.681		10705	579.948	329.289	4785.3	2047.46		6013.59	824.798		1162.47		1707.86			2065.26					1310
YOR308C	SNU66	Verified	1543.08	1708.71	51.6968		2857	210.689			1340.78			1708.71		1155.92		1749.41			1779.05
YNR062C	YNR062C	Uncharacterized	1709	1709		1709
YLR152C	YLR152C	Uncharacterized	1711	1711			1711
YPL087W	YDC1	Verified	1606.13	1711.56	62.1741		1015	28.6288								1445.45				2769.03	1977.66			2401.02
YMR258C	ROY1	Verified	2382.11	1714.15	69.2045		1416	206.245			617.004		5016.62	3599.29	1629.78	2291.14		1483.85	5149.16		1714.15					3080
YHR143W	DSE2	Verified	1714.58	1714.58	52.373									1079.62								2349.55
YCR095C	OCA4	Uncharacterized	1962.45	1715.42	82.1792		2869	301.977			1011.73		721.106	2683.74		457.073		2531.99			1715.42					5370
YOR036W	PEP12	Verified	2291.09	1715.42	75.801		5008	670.345			1375.2		902.188	1766.92	5033.62	1663.93						1908.55
YDR111C	ALT2	Uncharacterized	1869.49	1715.59	67.7788		198	129.896			1372.85			1677.56	1753.61	1504.22		2442.75	4164.53					1971.53		3480
YDR066C	RTR2	Verified	1971.39	1717.95	54.83		2622							443.14				1544.57	3414.19		1717.95				3007.91	1050
YGR047C	TFC4	Verified	1760.74	1717.95	56.9608		1165	157.387			2424.24			1134.3	1517.44	1813.01		1773.88	3634.84		1717.95			3154.1		876
YOL028C	YAP7	Verified	1471.58	1718.59	59.5554						327.95			542.372				1874.28		2647.72	1747.18					1690
YDR410C	STE14	Verified	1508.28	1718.79	58.0309			125.367						1135.11		793.078		1975.75			2119.87	1718.79				2690
YDR005C	MAF1	Verified	1898.27	1720	68.6651		5199	231.408			894.549		2089.12	1604.32		986.729	2158.49	1212.14		2777.55	2007.65					1720
YNR004W	SWM2	Verified	1478.75	1720	53.1236			181.919								2294.52		1729.51			1467.8					1720
YHR115C	DMA1	Verified	2044.73	1721.73	70.081		2478	182.613			1090.38	1721.73		1354.9	5271.44	2028.78		1484.72								2790
YJL110C	GZF3	Verified	1529.86	1721.76	82.7586		2544	53.3109	98.0491		2279.26					1009.89		1969.26	3774.2		1721.76					319
YHR040W	BCD1	Verified	3932.38	1723.42	174.478		3419	487.784			1562.46	2018.94	23305.7	1558.13		768.976		1884.38			1518.48					2800
YPL244C	HUT1	Verified	2003.52	1724.8	48.155		3077									1724.8		1208.77
YDL036C	PUS9	Verified	1604.86	1726.81	55.7665			301.071			2625.33			1726.81		1908.06		1431.44				2602.29				639
YKL194C	MST1	Verified	2240.96	1727.31	65.9587		2031	799.618		1226.13	1423.63			4755.59		4276.78								2174.95		1240
YML006C	GIS4	Verified	2467.65	1727.71	131.183		1111	94.6217			1868.75			2014.33		933.301		1727.71	3485.18		1671.13	2216.96			11799.1	222
YGR144W	THI4	Verified	3945.75	1727.9	122.967		1182					11181.3	2273.79					1145.95
YNL152W	INN1	Verified	1604.89	1728.11	51.6519		1811	93.4012						1095.19		2487.77		1554.29		2464.5	1728.11
YGL197W	MDS3	Verified	1713.04	1728.61	65.3994	159	2006	226.376			2937.32	3184.67		3142.14		1368.32		1728.61			1498.67			2196.31		396
YHR186C	KOG1	Verified	1974.29	1729.3	58.6279		2611	350.053	528.063		1849.86	3340.58	1661.23	2966.28		1371.27		1356.98		4350.25	1508.57	1797.36
YDR425W	SNX41	Verified	1709.39	1729.32	68.3384		1151	367.244			196.026		355.697	1331.17		1658.63	2162.56	1885.3	3981.77		2182.7				3440.57	1800
YDL101C	DUN1	Verified	2222.4	1729.38	55.466		1664	257.587		758.799	3691.64	1722.7		3785.15		3570.01	2187.56	1599.53			1729.38					3480
YDR151C	CTH1	Verified	1729.51	1729.51														1729.51
YCR033W	SNT1	Verified	1451.15	1729.51	52.8051		1158	238.386	1057.79		2067.39			2121.76		2126.15	2165.4	1729.51								396
YDR075W	PPH3	Verified	1672.76	1730.63	55.5529		1663	274.722	776.58		1291.04			1730.63		489.716	2228.61	2032.46			1817.43				3256.2	2840
YGL139W	FLC3	Verified	1642.98	1731.82	76.2529		1512	159.577			3416.19			2477.24		341.214					1951.65
YJR149W	YJR149W	Uncharacterized	1578.18	1731.97	67.1757								1731.97	1040.48				1923.96						3022.48		172
YOR377W	ATF1	Verified	1799.65	1734.4	59.6709			182.535			754.278	1592.16	2403.24	1158.64		3786.43		1218.04				1876.65			3034.51	1990
YMR272W-B	YMR272W-B	Uncharacterized	1734.45	1734.45																		1734.45
YPL229W	YPL229W	Uncharacterized	1573.26	1734.46	31.9732		1180											1922.11			1734.46			2107.71		922
YOR337W	TEA1	Verified	1439.52	1735	52.2331	1735	2037	55.1396			1647.97							1876.12			1989.39					736
YPL191C	YPL191C	Verified	1546.17	1735.84	53.2394		534				748.194			934.151		1040.62		1735.84			1954.25	1750.13			3168.38	2050
YJR050W	ISY1	Verified	1532.45	1736.91	47.748		2049	84.8628			1169.05			1090.79		2402.07		1669.2			1804.62					1990
YOR233W	KIN4	Verified	1500.36	1739.55	57.1067		1044	298.229			2389.2	2134.74		2390.22		1315.08		2049.25			1739.55					143
YBL021C	HAP3	Verified	1672.79	1740.65	53.0175		1685	113.495										1412.32		2519.63	1796.3					2510
YJL031C	BET4	Verified	1879.72	1742.99	43.6842		1509	1200.69		734.327	3026.86	1976.97	1379.2	2304.98		2905.73
YNL116W	DMA2	Verified	2753.76	1743.3	79.2292		1442	353.046						1736.6	6455.41	5656.21		1515.47							3121.35	1750
YPR105C	COG4	Verified	2207.89	1744.2	78.9135	310	2524	391.249		594.664	4006.85		3797.69	5512.81		1868.4		1453.23								1620
YDR532C	KRE28	Verified	1745.37	1744.88	68.6066		656	90.5458			1769.37			2867.93		880.333		1744.88	3698.35	2314.64	1523.45				3276.55	377
YBR238C	YBR238C	Verified	2039.75	1747.82	95.0824	451	845	139.917			1605.75		7449.45	560.004		2239.66		1889.89	3405.79		1584.47			2226.09		2080
YMR316W	DIA1	Verified	2015.54	1748.42	64.5777		2027	3944.97						773.206		3142.23		1469.83								736
YPL193W	RSA1	Verified	1599.66	1749.41	72.1887		2140	339.555			1864.24	2715.84		1077.48		572.269		1749.41	3679.17							259
YPL097W	MSY1	Verified	1887.27	1749.72	82.5478	481	1110	314.458	1270.77	2142.58	526.236			2058.46	6301	2771.6	2658.38	2154.36			1749.72					996
YDL175C	AIR2	Verified	2052.79	1750.1	72.8291		5813	351.927			1925.53		1117	1571.32		1176.84		2017.55			1700.21				3054.49	1800
YOR154W	SLP1	Verified	1687.54	1750.13	62.1791	457		2659.73			426.015							1406.24			1863.69	1750.13				3250
YPL180W	TCO89	Verified	2016.06	1750.13	83.4885		4207	326.393			4167.09		868.915	1488.34	4986.26	484.127		1836.73			1818.71	1750.13				243
YKR011C	YKR011C	Verified	2178.8	1750.31	59.2028		3806							580.702				1750.31			1606.99					3150
YIL092W	YIL092W	Uncharacterized	1772.25	1751.04	92.3008	2829										673.086									3481.9	105
YPR162C	ORC4	Verified	4702.82	1752.24	191.062	26860	1132	186.784			2295.55			1334.47		2496.99		1146.79								2170
YKR099W	BAS1	Verified	1507.34	1754	64.231		2282	143.665			2151.04			2810.14		302.888		1762.09			1745.91					861
YBR231C	SWC5	Verified	1653.07	1754.49	52.8089		3299	198.968			1512.59		965.39	1879.67		793.078	2461.1	1911.98			1828.98					1680
YCL024W	KCC4	Verified	1378.69	1754.64	64.3185		1988	111.339			2359.52			1754.64		771.309								2128.05		538
YGR198W	YPP1	Verified	2052.73	1754.72	56.1658		1256	378.833	876.706		1852.98	3419.47	4531.48	3070.65		2432.1		1946.12			1571.98	1656.45				1640
YNL065W	AQR1	Verified	1761.62	1755.18	83.0431		715	20.3276			1838.38					250.471		2756.79			4436.08	1671.99		2403.96
YGR104C	SRB5	Verified	2117.14	1755.75	65.8739		4632	233.36						756.091		2869.35	2893.72	1755.75			1715.42				3188.59	1010
YPR166C	MRP2	Verified	1701.3	1756	68.3803		1756	81.1502						2937.43	2641.67	1090.25
YLR254C	NDL1	Verified	1902.41	1756.09	20.3697													1727.71		2547.32	1756.09			1940.93		1540
YKL078W	DHR2	Verified	1734.11	1757.91	57.8269		556	450.056			1757.91			2856.51		3096.14		2506.71			1477.67			2185.02		721
YKL017C	HCS1	Verified	1726.83	1758.43	53.1504	557	1934	383.655			2359		2910.23	1742.92		1426.09					1773.94				3141.48	1040
YBL067C	UBP13	Verified	1826.06	1759.13	79.1877		2917	446.164	443.608		4109.5		1661.23	1857.03		3048.95										125
YKL055C	OAR1	Verified	4716.94	1760	180.59	3132	2058	83.602			678.593				23907.1			1399.31								1760
YBR221W-A	YBR221W-A	Uncharacterized	1760.53	1760.53											1760.53
YLR144C	ACF2	Verified	1732.54	1765.95	48.566	2490	2771	376.195			1011.57			1635.96		737.156		2297.67		2689.86	1895.94					1420
YDR103W	STE5	Verified	1482.45	1766	70.3385	1766	737	55.731			195.558			1320.53		2026.51		1945.2	3395.55							1900
YDR490C	PKH1	Verified	1727.82	1767	63.4623	1767	3985	221.269			2125.66	2168.85	553.06	2122.86		1344.65		1262.04
YDR316W	OMS1	Verified	1825.1	1767.56	102.185		580	432.094			2514.29		1887	6291.29		376.441	2073.18				1767.56					504
YOR077W	RTS2	Verified	2034.74	1767.56	61.9927		1497	197.803					1258.72			1131.45	2674.16	2637.54		2558.43	1767.56					4590
YKR036C	CAF4	Verified	1534.22	1770.94	39.8153		1945	248.455			1576.21		1887	1843.14		1699.67		1842.22			2070.51	1640.94				589
YDR080W	VPS41	Verified	1657.4	1771.16	51.6735		761	310.537		737.281	2792.48		1970.27	2096.76		1720.98		1771.16			1826.41				3074.51	1170
YIL131C	FKH1	Verified	2080.91	1771.43	61.6715		1190	520.612	711.071		1771.43			2662.1	3514.54	4411.19								2227.23		1720
YOR244W	ESA1	Verified	1853.89	1772	55.5656		1772	255.725			1627.39			1161.77		654.981	2082.48	2645.39	3478.98		2219.89				3324.17	1170
YKL018C-A	YKL018C-A	Uncharacterized	1791.66	1772.13	69.1634			507.693			1772.13			2033.79				1163.48	3652.03						3054.49	358
YBR179C	FZO1	Verified	1779.58	1772.21	43.9307		1829	188.989			2482.51			2894.39		1434.01	2135.74	1706.96		2398.78	1715.42					1010
YKL203C	TOR2	Verified	1896.14	1773.5	69.2157	4524	693	202.233			2257.31	2544.91	1400.66	1835.98		1711.02
YCR018C	SRD1	Verified	1776.52	1776.52	25.7513																1453.03					2100
YLR298C	YHC1	Verified	2215.19	1776.87	74.6484		1824	708.528		1729.75	6341.28		3312.35	1468.54		539.086				2426.1	1662.3					2140
YOR297C	TIM18	Verified	2155.99	1777.59	61.6045		3162	202.682	1777.59				1226.81	2889.9		1267.12		1290.13		3147.71						4440
YIR021W	MRS1	Verified	1945.55	1778.1	74.5839		1704	251.513			719.809		985.581	1778.1		2257.19		1911.98		2661.74						5240
YNL320W	YNL320W	Uncharacterized	1774.72	1779.31	60.1782		3343	644.58					2183.35	1537.54		2955.67		1253.56				2021.08				259
YKR031C	SPO14	Verified	1654.25	1781.15	76.1842	1108	1121	148.199			3993.19		1800	3281.31		449.96	2533.84	1781.15			1930.89					49.2
YDL001W	RMD1	Verified	1923.48	1781.59	46.4082		1439	295.544			1584.08			1765.72		2381.17	2832.25			3490.98	2614.43	1781.59		2021.54		952
YGL259W	YPS5	Uncharacterized	1781.59	1781.59																		1781.59
YDR422C	SIP1	Verified	2051.83	1782.22	67.0481		4320	119.851			1878.14					1217.83	2356.99	1317.47	3964.22		1686.29				3034.51	623
YDR420W	HKR1	Verified	1782.86	1782.86	37.0516													1315.76				2249.96
YHR090C	YNG2	Verified	1614.51	1782.88	68.1089		1047	38.6358								673.086		2031.53		2519.63	1782.88				3208.83
YLR417W	VPS36	Verified	1737.56	1783.85	82.3737			103.29	277.524		2219.74			409.217		1354.69		1716.88	5039.52		1850.82			1933.92		2470
YER169W	RPH1	Verified	2117.23	1783.87	58.7318	4797	2987	479.721			2489.57			1448.26		1235.15		1783.87			1604.49					2230
YMR135C	GID8	Verified	2539.58	1784.16	77.9151		5964	1297.64	1119.18		3575.38		857.546	2301.21		584.713	2169.35	1710.56	6315.68		1784.16			4696.09		639
YLR006C	SSK1	Verified	2126.85	1789.64	65.2471	4863	3824	310.857			1569.02			1514.19		884.472	2220.53				2010.27			2872.21		1200
YMR069W	NAT4	Verified	1985.52	1791.78	39.8203		1284											2038.99			1544.57				3074.51
YAL032C	PRP45	Verified	1846.15	1791.83	45.831		2532	182.752			3258.11			1482.26		1453.85	2230.68	2013.83			1791.83					1670
YIL009C-A	EST3	Verified	1791.94	1791.94	48.7404											2409.52		1174.35
YBR264C	YPT10	Verified	2386.38	1792.19	67.4079		6073	1096.31	928.298		2794.81		3953.49	2836.08		1755.38		1237.47				1828.99				1360
YPL151C	PRP46	Verified	4249.27	1792.96	202.911	30133	1042	227.952	657.594		2510.28			1791.62		1846.14		1792.96			1828.98				3141.48	1770
YBR093C	PHO5	Verified	3750.08	1793.01	99.831			1882.5				8560.04	2864.53	1512.34	10803.9	1703.51						1563.84				1110
YHR172W	SPC97	Verified	1735.12	1794.38	54.1345		1858	284.56			2172.34			1624.7		687.147		1416.66	3548.29		1794.38					2230
YAL053W	FLC2	Verified	2786.76	1797.36	84.1847		4248	293.382			3323.53			6151.53	6312.77	808.301					1731.92	1797.36				414
YOL048C	RRT8	Verified	2165.14	1797.36	63.2878			325.173										1753.03		3915.62		1797.36			3034.51
YOR075W	UFE1	Verified	2090.27	1797.36	73.0771		2165	600.115			604.802	6002.92	1980.44	1757.86		724.201				2439.8	1711.61	1797.36			3208.83
YIL077C	YIL077C	Uncharacterized	1845.59	1797.87	53.059		3665	153.059			1797.87			2094.45				1646.81		2309.24	1643.41			2378.49		922
YPL045W	VPS16	Verified	1943.08	1798.31	61.6937	4333	1640	276.801			775.983		868.915	2945.06		1455.18		2075.43	3684.97		2005.04	1956.62				1300
YLR390W	ECM19	Verified	3298.08	1798.42	142.063		13753	112.019					2792.8	958.724				1798.42			1781.6					1890
YML019W	OST6	Verified	1708.48	1800.2	36.9467		1738	849.269			1862.41	1385.19	1892.31	1955.54		2905.14										1080
YPL256C	CLN2	Verified	1801	1801	41.6961	2332																				1270
YER040W	GLN3	Verified	1915.03	1801.52	73.1009		4717	86.8789	680.925		1316.05			372.99		1584.55	2950.42	2018.48			2845.26			2515.02	3303.74	589
YER054C	GIP2	Verified	1925.08	1802.98	86.4284		4196	97.2778					760.678					1802.98						3305.06	3188.59	125
YOL042W	NGL1	Verified	2189.34	1803.79	76.1358		575	178.649		4961.53				3571		1535.47		1140.96						2072.11		3480
YLR050C	YLR050C	Uncharacterized	1718.37	1805.9	42.592			522.852		1243.95				2432.8	1688.75	1703.52		2138.34		2360.68	1805.9	2249.96		2397.32		358
YAL001C	TFC3	Verified	2090.45	1809.04	88.9687		2009	302.384			1809.04	2209.79	1364.7	5475.88	4712.34	805.948										125
YEL053C	MAK10	Verified	1538.29	1809.16	45.9182			334.989			547.129		1887	2276.65		1945.95		1731.32			1613.26					1970
YOR353C	SOG2	Verified	1900.18	1811.33	55.9615		2722	266.538			1771.29		3718.79	2315.55		1663.93		1851.37								892
YDR511W	SDH7	Verified	3326.27	1811.93	121.457		13341	747.518			3838.51		1151.87	3056.55	1811.93	4643.12		1150.96								195
YHL038C	CBP2	Verified	1715.04	1813.59	49.4067		970	255.406		2263.06	2048.15			2695.08		1031.19	2130.62	1156.8			1813.59				3141.48	1360
YLR080W	EMP46	Verified	1861.45	1818.02	57.1349	676	2708	624.299			3205.97		1053.29	1302.5										2333.54	2988.01
YLR021W	IRC25	Verified	2111.52	1820	73.9718		4534	404.028			2891.72			972.405	689.923	3468.57										1820
YHR102W	KIC1	Verified	1742.91	1821	62.2979		1821	160.79			1287.95			2803.18		847.882		1938.73	3790.79		1995.91					1040
YML029W	USA1	Verified	2164.26	1821.73	81.7305		1410	209.36	1821.73		1879.76		1510.14	2666.4		6556.36					1534.62					1890
YHR103W	SBE22	Verified	2016.3	1823.03	62.3314		2592	190.107			4176.77		1335.26	2205.44		837.377		1823.03	3473.16		1513.53
YPL222W	FMP40	Uncharacterized	1732.01	1823.95	39.6829		2561	913.669			2015.81			757.124		1315.84					1632.09			2230.58		2430
YIL144W	NDC80	Verified	1865.56	1824.67	58.1004	332	1224	268.706			3396.08			1291.49		1454.7	2284.05		3433.31		2194.64			2339.82	3007.91	1160
YNL193W	YNL193W	Uncharacterized	2105.02	1825	84.1922		1825	318.802			1375.39	5664.3	664.797	2253.13		2633.74
YML091C	RPM2	Verified	2006.3	1825.63	106.094		969	89.0772		185.128	2006.03			1964.98	8234.49	815.571	2118.04	2860.1			1686.29			1986.89		1160
YIL112W	HOS4	Verified	1711.12	1825.71	59.7772		3371	140.604			2113.18			1225.16		685.526	2502.08	1840.39			1811.02
YBR022W	POA1	Verified	2955	1826.76	85.3245		2354	1142.99			8444.75		1297.54	3992.8		3938.44		1299.51								1170
YNR048W	YNR048W	Verified	2511.01	1828.47	79.3463		778	134.867			1576.64			898.816		622.479		1812.09	4435.19	2920.61		1844.85		6646.57	3951.98	4510
YDL209C	CWC2	Verified	2863.14	1828.51	96.7373		3641	472.306	10492.8		1820.63		664.797	3716.69		1223.57		1828.51			1639.63				3344.64	2650
YOL161C	PAU20	Verified	1828.99	1828.99																		1828.99
YBL059C-A	CMC2	Verified	2487.49	1829.53	58.4384		3710	1390.18		1788.38	1729.85		3382.38	4904.19	4134.88	1870.69		1685.36								279
YDR379W	RGA2	Verified	2002.08	1829.68	56.1871		1446	331.734	2323.24		3372.72			1786.92		1353.88	2362.21	1872.45	3532.99		1728.11			3660.73		254
YMR240C	CUS1	Verified	1897.24	1830	51.2356		961	335.303			3005.18	1779.51	1090.14	2535.28		577.176			3404.35	2431.58	1717.95			1922.08	3074.51	1830
YCL029C	BIK1	Verified	1926.8	1830.34	57.1629		2837	418.095			2973.47			1862.99		1801.28		1830.34	3596.25		1721.76					300
YGL140C	YGL140C	Uncharacterized	1659.5	1830.63	46.4928		2174	87.7942			1342.41			2590.23		1042.06	2188.03	1895.41			2429.19	1765.85				1080
YNL224C	SQS1	Verified	1868	1831.54	52.7154	497	2139	427.835			3120.52	1299.19		1804.03	2372.84	3693.06		1923.04			1831.54					1440
YDR279W	RNH202	Verified	2037.97	1831.89	47.9519		1548	613.873			1784			3857.53		2812.75		1879.79			1467.8					2340
YFR031C	SMC2	Verified	2109.07	1832.83	54.9444	1002	873	290.898			2774.08			3642.79		1563.65	2384.98	1811.18	3734.33		1832.83					3290
YEL067C	YEL067C	Uncharacterized	1835	1835		1835
YLL006W	MMM1	Verified	1815.03	1836.38	52.5808		1485	267.606						1484.32		2187.75				2975.49						2490
YLR375W	STP3	Verified	2122.24	1837.99	53.8272		1850	310.145			1798.32		3355.15	1825.99		2174.18		1689.86						2497.44	4481.3	1240
YJR116W	TDA4	Uncharacterized	1445.18	1840.39	50.3367											605.664		1840.39			1889.48
YLR299W	ECM38	Verified	1940.19	1841	72.1051	2261	1841	108.582			4534.35			2213.17		873.374			3493.54		1464.72					672
YDR479C	PEX29	Verified	2012.16	1842.27	74.0924		1938	124.369						545.237						2472.74	1746.54	1687.56		2542.84		5040
YPR008W	HAA1	Verified	2039.83	1844.64	102.523		1108	225.906	1377.14		2567.02		535.254	1986.36	8185.64	1811.41		2506.71			1877.87			1957.7		339
YPR179C	HDA3	Verified	1985.33	1847.11	57.0269		2421	306.23			4178.79			2609.05		1267.52		1155.13			1777.13			1917.09	3121.35	1100
YLR326W	YLR326W	Uncharacterized	1980.15	1848.94	25.4837									1981.86		2950.49		1741.26			1730.65	1956.62				1520
YDL156W	CMR1	Verified	2086.72	1849.79	55.8709		1624	464.011			2182.99			1849.79		1302.09			3374.14							3810
YIL079C	AIR1	Verified	2098.54	1851.23	52.0239		4185	163.891			1592.53			1603.61	3211.38	2482.51		2098.86		2516.87	1580.72					1550
YMR056C	AAC1	Verified	1852.68	1852.68	129.867		3554	151.366
YML021C	UNG1	Verified	2526.73	1853.61	50.1099		1812	1102.91			3419.45			1853.61		3653.27		1218.89			1805.9				3054.49	4820
YBR070C	ALG14	Verified	2567.3	1854.68	74.8939			60.5455								1334.69		1552.52	3958.62	4508.75	1854.68			4590.5	4906.39	339
YDL045C	FAD1	Verified	2444.23	1854.84	89.7791			376.517		4296.04	1992.78		1854.84	863.054		6519.28		1207.09
YHL025W	SNF6	Verified	1987.45	1856.66	70.3975		692	52.211						799.032	4724.13	1251.9		2203.51		2667.36	1509.81				3074.51	2900
YJL131C	AIM23	Verified	1727.65	1856.67	74.5323		3332	331.389			2706.15		2382.14	3042.9		376.441		1331.19								319
YGL083W	SCY1	Verified	1984.82	1856.86	56.3482		2009	386.122	584.924		2906.17		1887	2825.54		4435.27		1856.86			1836.68	1625.46				1480
YKL134C	OCT1	Verified	1828.62	1857.25	56.1314		2769	216.953	772.474		1857.25			3123.16		784.468				2396.06	1848.25					2690
YGL117W	YGL117W	Uncharacterized	1999.02	1857.78	80.1707		4793	342.221			2450.63			2952.49		1448.02		1857.78								149
YKR069W	MET1	Verified	2773.65	1860.73	89.9511	482	4034	3.37391	1234.12	6092.3				5709.04								1860.73
YGR247W	CPD1	Verified	1851.96	1864	46.7533		1864	202.536					1379.2			2469.66		2152.47	3402.64		2020.72	1656.45				1520
YGR243W	MPC3	Verified	2807.71	1864.12	104.017			116.139			209.497	6042.41						1206.25						2521.98		6750
YPR131C	NAT3	Verified	2370.46	1864.98	62.2426		2938	1354.09		2685.48	692.572			1746.75		5539.4	2646.98	1762.09	4205.76		1864.98					639
YER018C	SPC25	Verified	2028.42	1866.27	63.168			198.095			1428.34					2263.11		1188.6	3974.49		1866.27					3280
YPL140C	MKK2	Verified	2389.83	1866.33	94.0018	7201	2269	882.248			831.574			1782.65		266.001			3936.17							1950
YJR046W	TAH11	Verified	1680.48	1866.34	68.2647		630	347.156		247.661	1833.59		1379.2	1967.37		4169.11		1899.09			2141.66					2190
YOL101C	IZH4	Verified	1866.7	1866.7	103.39		502						3231.41
YOR238W	YOR238W	Uncharacterized	2252.27	1867.56	76.9242	668	3440	890.585			2788.06		1226.81	2366.11		6792.38	2096.82	1746.69			1867.56					892
YER050C	RSM18	Verified	2310.09	1870.44	82.5199			227.033	1464.83					2276.05	5692.78	2989.85										1210
YHR198C	AIM18	Verified	4054.25	1870.65	146.856		5490	608.127		1104.08	2570.79		1099.16	4140.66	20438.3	2163.98		1577.32								1350
YLR436C	ECM30	Verified	1578.93	1870.81	61.3973	261	875	62.0201			1464.55		2038.94	648.09		1870.81	2098.69	2128.93	3546.62		2088.92			2362.49		1080
YKR023W	YKR023W	Uncharacterized	2483.65	1871.28	56.7644		4322	712.895			2746.45	5100.26	1456.4	4007.8		941.623		1833.99			1719.22			1908.57	3344.64	1710
YLR130C	ZRT2	Verified	1606.22	1872.36	53.4276		2436	35.2144			632.559			2077.1				1517.23		2406.97	2010.27	1734.45
YDR143C	SAN1	Verified	2165.43	1872.43	96.7237		2107	40.6592			1637.86				5542.08	3492.99										172
YPR075C	OPY2	Verified	2045.5	1872.71	64.8282		4387	93.2577			648.599	3528.13				933.301		1778.42	3399.34		1872.71	2366.23		2333.54		1160
YCL055W	KAR4	Verified	1731.78	1873.17	49.1512		570	2118.26			1603.71			399.145		691.055	2996.16	2235.76		2481	2391.37			1873.17		1690
YDR243C	PRP28	Verified	1724.65	1873.76	61.7569	416	2091	277.117			2431.71		2183.35	1261.18		947.707		1901.85	3890.95		1845.68
YJL030W	MAD2	Verified	2385.04	1874.33	50.6976		4499	927.691		2486.3	1699.16		3376.35	1874.33		4119.37		1541.92			1613.26				2988.01	1110
YFR055W	IRC7	Verified	1875.06	1875.06	55.4306													1140.12								2610
YBR133C	HSL7	Verified	1576.34	1876.58	66.2718		455	129.063			2942.52			2571.46		1879.79					1876.58					1180
YNL238W	KEX2	Verified	2270.65	1876.65	68.2064		580	105.417			1807.66			1039.85		651.872	3504.39			3603.5	3530.67	1876.65	4325.16		3951.98
YBR257W	POP4	Verified	1510.17	1877.99	61.5852		2022	307.109	413.149					2007.47		2562.77		1748.5
YLR020C	YEH2	Verified	2032.96	1878.8	32.7484		1791	1062.96			1640.37		1250.82	2425.64		1949.13		2033.39		2552.87	1808.46			2926.69	3324.17	1630
YKL139W	CTK1	Verified	1996.04	1878.87	57.9234		2779	471.146			1405.29		1242.86	2848.27		2198.45		1878.87			1852.11			3899.28	3256.2	125
YKR045C	YKR045C	Uncharacterized	1750.19	1879.87	76.2194			5.13924										2041.79			1717.95				3235.87
YGL047W	ALG13	Verified	2391.77	1883.08	71.9299		2237	870.047					2040.42	1377.89		7024.97		1769.34			1816.15	1797.36			3034.51	1950
YBR246W	RRT2	Verified	2076.28	1883.4	72.6588	5291	1573	341.976			2309.36			2193.8		847.024		1414.05								2640
YDL207W	GLE1	Verified	1811.03	1884.32	50.8485	769	2375	383.833			2338.42			1771.95		995.845	3293.16	2180.8		2888.96	1884.32					1040
YER071C	TDA2	Uncharacterized	2690.47	1885.86	80.3112		7738	2360.59		4425.73	2424.96		1696.96	1885.86		1022.6		1860.53								799
YDR326C	YSP2	Verified	1890.4	1886	81.4902		1886	198.938			3913.39			2841.59		612.078
YLR090W	XDJ1	Verified	2088.53	1886.22	58.5521		1423	471.255	326.376		2211.14			3463.15		3189.59	3486.78	1886.22	3718.09		1588.22					1210
YOR104W	PIN2	Verified	2117.42	1886.81	57.192		4068	136.142			1131.81			1424.96		1507.64	2069.96	2456.29	3618.41		2540.58	1594.59		1886.81	4095.27	996
YOL141W	PPM2	Verified	2097.06	1886.9	55.8641		1843	490.466			1658.91			4087.42		2337.17			3669.39		1886.9			2070.29		830
YLR459W	GAB1	Verified	1794.24	1888.75	23.6563							1215.42				1755.29		2022.21				2184.05
YOR152C	ATG40	Verified	2141.73	1890	75.8328						69.2219			610.357				1583.53	4847.89	3118.33				2872.76		1890
YLR393W	ATP10	Verified	2146.71	1890	49.4757		3949	974.297			2862.03			2628.35		1134.41		1588.86								1890
YLR207W	HRD3	Verified	1613.89	1890.88	51.9459		2081	106.129			1700.76			2436.21		1273.28						2085.96
YDR006C	SOK1	Verified	1819.53	1891.21	57.3361		3745	235.806			1891.21	995.126		813.527		2079.3	2460.47	2380.09			1775.22
YKL095W	YJU2	Verified	3966.5	1891.49	168.243		1229	322.935			2923.39				20357	866.736		2072.63			1710.34					2250
YNL074C	MLF3	Verified	3685.41	1892.59	106.674		13797	368.943			1391.08		2605.11	2432.66	7670.99	1755.19		1572.89	5254.82		1798.22	1892.59
YGR263C	SAY1	Verified	2159.88	1893.63	52.4156		1683	234.148			1852.21			1893.63		3802.69				2811.7				2841.76
YGR283C	YGR283C	Verified	2262.4	1894.65	54.4179	4820	1199	894.433			1412.87		2183.35	3349.87		1787.39					1894.65					2820
YNR010W	CSE2	Verified	1867.43	1895.14	43.9188		2231	924.912			1098.83			1987.63		3546.82		1936.88			1853.39					1360
YDR235W	PRP42	Verified	2203.61	1895.15	89.1312		1345	298.33			1920.19		7560.57	1895.15		250.471	2207.14	2051.12			1745.91				3235.87	1730
YER172C	BRR2	Verified	3101.16	1897.96	89.4874	6231	1828	452.649	561.029		5570.58		3324.63	9855.86		1967.91	2465.12	1809.35			1707.81					1440
YDR288W	NSE3	Verified	1640.63	1898.39	62.7894		791	142.545						1972.94		555.651	2264.52				1823.84				3034.51	2540
YCR094W	CDC50	Verified	1750.99	1900.21	52.8676		1311	239.615			1344.51			2177.98		744.355	2858.61	2236.71			2588.4	1625.46		2174.95	3121.35	589
YNL225C	CNM67	Verified	1883.81	1900.68	52.2662		661	301.417			2161.15			2769.33		1900.68	2128.2	1672.79			1807.18			3552.57
YNR049C	MSO1	Verified	2602.24	1901.06	94.3704		9262	883.425			2051.98	939.474	2074.62	1596.84		3095.88						1750.13			2988.01	1380
YDL160C-A	MHF2	Verified	9374.6	1901.3	181.565		43953	2249.6			1553.01		1496.88	1280.72		5714.38
YKL138C-A	HSK3	Verified	9005.23	1901.61	170.023		31904	313.697						793.129		3010.08
YDR147W	EKI1	Verified	2152.96	1902	53.1108		1902	248.494	1673.77		3543.31		1350.06	1734.81		740.572			3545.71					2515.87	3007.91	3420
YER163C	GCG1	Verified	2724.21	1902.74	69.8713		2781	610.078			4599.79	2263.57		1378.33	6255.2	5007.31		1541.92			1504.86					1300
YJR022W	LSM8	Verified	2625.66	1903.22	64.8159		3441	595.3	2919.51	1201.44	4428.25		2965.53	1903.22		6518.01		1860.53			1609.5					1440
YOR342C	YOR342C	Verified	1996.55	1903.55	64.0149			34.7422										3291.82	3485.66		1928.29			1878.8		1360
YOL107W	YOL107W	Uncharacterized	2088.37	1903.7	60.5767						110.125			1467.62		4046.93				3177.17	1903.7	2283.06				1630
YKR030W	GMH1	Verified	1904.42	1904.42	36.7777											1409.16						2399.67
YHR165C	PRP8	Verified	2115.5	1904.99	62.1496	3781	570	224.734			3753.53	1196.26	1496.88	3673.23		1799.85	3225.19	2038.05			1904.99			3369.76		468
YOR028C	CIN5	Verified	1905.13	1905.13	10.012		2040											1770.25
YHR017W	YSC83	Verified	1745.12	1905.31	45.4978		2572	428.845			2316.57		1342.68	1592.29		2218.33
[truncated: 3,859 more rows]
