# Supplementary material for: A systematic bi-genomic split-GFP assay illuminates the mitochondrial matrix proteome and protein targeting routes
Source: eLife journal article supplement (doi:10.7554/elife.98889), 2024-07-26
Supplement: fig2-data1 [file Morgenstern_2017_Table_S3.xlsx]

## Sheet: Legend & Footnotes
	Table S3. High-Confidence Mitochondrial Proteome. Related to Figure 1 and Table S1. The high-confidence mitochondrial proteome includes: class 1 proteins with a sequence coverage of > 20% (SD < 0.75; Figure S2I); mitochondrial proteins experimentally validated via import of radiolabeled precursors into mitochondria, subcellular fractionation or fluorescence microscopy; manually curated mitochondr…
	Footnotes
	1	Gene names newly defined in this study are marked in red
	2	Submitochondrial assignments are based on clustering and ratio cutoff results

## Sheet: High-confidence mito. proteome
Gene Systematic Name	UniProt ID	Gene Description	Gene Standard Name1	Molecular Weight [kDa]	Mean Copy Numbers - Profile	Mean Copy Number - Glucose	Mean Copy Number - Galactose	Mean Copy Number - Glycerol	Submitochondrial Localization2
YKL060C	P14540	Fructose 1,6-bisphosphate aldolase;required for glycolysis and gluconeogenesis;catalyzes conversion of fructose 1,6 bisphosphate to glyceraldehyde-3-P and dihydroxyacetone-P;locates to mitochondrial outer surface upon oxidative stress;N-terminally propionylated in vivo	FBA1	39.6091		1276423	706648	1095207
YPR080W	P02994	Translational elongation factor EF-1 alpha;in the GTP-bound active form, binds to and delivers aminoacylated tRNA to the A-site of ribosomes for elongation of nascent polypeptides;associates with vacuolar Rho1p GTPase;may also have a role in tRNA re-export from the nucleus;TEF1 has a paralog, TEF2, that arose from the whole genome duplication	TEF1	50.0453		1138402	816687	878623	IMS/IM
YCR012W	P00560	3-phosphoglycerate kinase;catalyzes transfer of high-energy phosphoryl groups from the acyl phosphate of 1,3-bisphosphoglycerate to ADP to produce ATP;key enzyme in glycolysis and gluconeogenesis	PGK1	44.7388		1087113	679360	1024898
YHR174W	P00925	Enolase II, a phosphopyruvate hydratase;catalyzes conversion of 2-phosphoglycerate to phosphoenolpyruvate during glycolysis and the reverse reaction during gluconeogenesis;expression induced in response to glucose;ENO2 has a paralog, ENO1, that arose from the whole genome duplication	ENO2	46.9056		989539	404151	498258	Matrix/IM
YKL152C	P00950	Tetrameric phosphoglycerate mutase;mediates the conversion of 3-phosphoglycerate to 2-phosphoglycerate during glycolysis and the reverse reaction during gluconeogenesis	GPM1	27.6118		876854	388092	578317	IMS/IM
YDR050C	P00942	Triose phosphate isomerase, abundant glycolytic enzyme;mRNA half-life is regulated by iron availability;transcription is controlled by activators Reb1p, Gcr1p, and Rap1p through binding sites in the 5' non-coding region;inhibition of Tpi1p activity by PEP (phosphoenolpyruvate) stimulates redox metabolism in respiring cells;E104D mutation in human homolog TPI1 causes a rare autosomal disease;human…	TPI1	26.7927		841531	530044	630138
YDR155C	P14832	Cytoplasmic peptidyl-prolyl cis-trans isomerase (cyclophilin);catalyzes the cis-trans isomerization of peptide bonds N-terminal to proline residues;binds the drug cyclosporin A;N-terminally propionylated in vivo;protein abundance increases in response to DNA replication stress	CPR1	17.3909		342835	220103	373347	IMS/IM
YGR192C	P00359	Glyceraldehyde-3-phosphate dehydrogenase (GAPDH), isozyme 3;involved in glycolysis and gluconeogenesis;tetramer that catalyzes the reaction of glyceraldehyde-3-phosphate to 1,3 bis-phosphoglycerate;detected in the cytoplasm and cell wall;GAPDH-derived antimicrobial peptides secreted by S. cerevisiae are active against a wide variety of wine-related yeasts and bacteria;binds AU-rich RNA	TDH3	35.745		323705	200393	292956
YJR104C	P00445	Cytosolic copper-zinc superoxide dismutase;detoxifies superoxide;stabilizes Yck1p and Yck2p kinases in glucose to repress respiration;phosphorylated by Dun1p, enters nucleus under oxidative stress to promote transcription of stress response genes;human ortholog SOD1 implicated in ALS complements a null allele;abundance increases under DNA replication stress and during exposure to boric acid;local…	SOD1	15.8498		292588	232662	350362	IMS/IM
YBR196C	P12709	Glycolytic enzyme phosphoglucose isomerase;catalyzes the interconversion of glucose-6-phosphate and fructose-6-phosphate;required for cell cycle progression and completion of the gluconeogenic events of sporulation	PGI1	61.2896		253215	199961	244867
YNL055C	P04840	Mitochondrial porin (voltage-dependent anion channel);outer membrane protein required for maintenance of mitochondrial osmotic stability and mitochondrial membrane permeability;couples the glutathione pools of the intermembrane space (IMS) and the cytosol;interacts with Om45 and Om14 in the outer membrane;phosphorylated;protein abundance increases in response to DNA replication stress	POR1	30.4298		224301	707247	629897
YLR355C	P06168	Acetohydroxyacid reductoisomerase and mtDNA binding protein;involved in branched-chain amino acid biosynthesis and maintenance of wild-type mitochondrial DNA;found in mitochondrial nucleoids	ILV5	44.377		219249	119111	158373
YKL056C	P35691	Protein that associates with ribosomes;homolog of translationally controlled tumor protein;green fluorescent protein (GFP)-fusion protein localizes to the cytoplasm and relocates to the mitochondrial outer surface upon oxidative stress	TMA19	18.7262		200687	136367	113912
YPL061W	P54115	Cytosolic aldehyde dehydrogenase;activated by Mg2+ and utilizes NADP+ as the preferred coenzyme;required for conversion of acetaldehyde to acetate;constitutively expressed;locates to the mitochondrial outer surface upon oxidative stress	ALD6	54.4056		196889	92279	123824
YGR254W	P00924	Enolase I, a phosphopyruvate hydratase;catalyzes conversion of 2-phosphoglycerate to phosphoenolpyruvate during glycolysis and the reverse reaction during gluconeogenesis;expression repressed in response to glucose;protein abundance increases in response to DNA replication stress;N-terminally propionylated in vivo;ENO1 has a paralog, ENO2, that arose from the whole genome duplication	ENO1	46.8115		165245	159741	464155
YJL052W	P00360	Glyceraldehyde-3-phosphate dehydrogenase (GAPDH), isozyme 1;involved in glycolysis and gluconeogenesis;tetramer that catalyzes the reaction of glyceraldehyde-3-phosphate to 1,3 bis-phosphoglycerate;detected in the cytoplasm and cell wall;protein abundance increases in response to DNA replication stress;GAPDH-derived antimicrobial peptides secreted by S. cerevisiae are active against a wide variet…	TDH1	35.7523		119619	44909	215544	OM
YLR259C	P19882	Tetradecameric mitochondrial chaperonin;required for ATP-dependent folding of precursor polypeptides and complex assembly;prevents aggregation and mediates protein refolding after heat shock;role in mtDNA transmission;phosphorylated	HSP60	60.7412		114767	157718	127139
YGR234W	P39676	Nitric oxide oxidoreductase;flavohemoglobin that plays role in oxidative and nitrosative stress responses;protects against nitration of cellular targets and against cell growth inhibition under aerobic or anaerobic conditions;yeast flavohemoglobin Yhb1p and human homolog neuroglobin NGB protect cells against alpha-synuclein cytotoxicity and aggregate formation;protein increases in abundance, relo…	YHB1	44.6367		113931	219599	167104
YGL253W	P04807	Hexokinase isoenzyme 2;phosphorylates glucose in cytosol;predominant hexokinase during growth on glucose;represses expression of HXK1, GLK1, induces expression of its own gene;antiapoptotic;phosphorylation/dephosphorylation at Ser14 by kinase Snf1p, phosphatase Glc7p-Reg1p regulates nucleocytoplasmic shuttling of Hxk2p;functions downstream of Sit4p in control of cell cycle, mitochondrial function…	HXK2	53.9309		113899	218580	149553
YOR020C	P38910	Mitochondrial matrix co-chaperonin;inhibits the ATPase activity of Hsp60p, a mitochondrial chaperonin;involved in protein folding and sorting in the mitochondria;10 kD heat shock protein with similarity to E. coli groES	HSP10	11.3744		99861	110780	106852	Matrix/IM
YJR045C	P0CS90	Hsp70 family ATPase;constituent of the import motor component of the Translocase of the Inner Mitochondrial membrane (TIM23 complex);involved in protein translocation and folding;subunit of SceI endonuclease;SSC1 has a paralog, ECM10, that arose from the whole genome duplication	SSC1	70.6205		99173	132203	103603
YJR121W	P00830	Beta subunit of the F1 sector of mitochondrial F1F0 ATP synthase;which is a large, evolutionarily conserved enzyme complex required for ATP synthesis;F1 translationally regulates ATP6 and ATP8 expression to achieve a balanced output of ATP synthase genes encoded in nucleus and mitochondria;phosphorylated	ATP2	54.7852		90560	336865	356034
YLR304C	P19414	Aconitase;required for the tricarboxylic acid (TCA) cycle and also independently required for mitochondrial genome maintenance;component of the mitochondrial nucleoid;mutation leads to glutamate auxotrophy;human homolog ACO2 can complement yeast null mutant	ACO1	85.3722		79401	128904	152031
YBL099W	P07251	Alpha subunit of the F1 sector of mitochondrial F1F0 ATP synthase;which is a large, evolutionarily conserved enzyme complex required for ATP synthesis;F1 translationally regulates ATP6 and ATP8 expression to achieve a balanced output of ATP synthase genes encoded in nucleus and mitochondria;phosphorylated;N-terminally propionylated in vivo	ATP1	58.6147		78868	278269	299125
YDR226W	P07170	Adenylate kinase, required for purine metabolism;localized to the cytoplasm and the mitochondria;lacks cleavable signal sequence;protein abundance increases in response to DNA replication stress;mutations affecting Adk1p catalytic activity deregulate expression of phosphate utilization genes PHO5 and PHO84;human homolog AK1 can complement yeast adk1 mutant	ADK1	24.252		73007	76430	69097	IMS/IM
YLL024C	P10592	HSP70 family ATP-binding protein;involved in protein folding, vacuolar import of proteins;required for ubiquitin-dependent degradation of short-lived proteins;associated with chaperonin-containing T-complex;98% identical to paralog Ssa1p with distinct functional specificity in propagation of yeast [URE3] prions and vacuolar-mediated degradation of gluconeogenesis enzymes;binds tRNA, has role in t…	SSA2	69.4475		67110	20796	10255
YOR374W	P46367	Mitochondrial aldehyde dehydrogenase;required for growth on ethanol and conversion of acetaldehyde to acetate;phosphorylated;activity is K+ dependent;utilizes NADP+ or NAD+ equally as coenzymes;expression is glucose repressed;can substitute for cytosolic NADP-dependent aldehyde dehydrogenase when directed to the cytosol;human homolog ALDH2 can complement yeast ald4 mutant	ALD4	56.7211		65605	185396	1088904	Matrix/IM
YBL030C	P18239	Major ADP/ATP carrier of the mitochondrial inner membrane;exchanges cytosolic ADP for mitochondrially synthesized ATP;also imports heme and ATP;required for viability in many lab strains that carry a sal1 mutation;PET9 has a paralog, AAC3, that arose from the whole genome duplication;human homolog SLC25A4 implicated in progressive external ophthalmoplegia can complement yeast null mutant	PET9	34.4467		64598	182039	188346	IMS/IM
YHR208W	P38891	Mitochondrial branched-chain amino acid (BCAA) aminotransferase;preferentially involved in BCAA biosynthesis;homolog of murine ECA39;highly expressed during logarithmic phase and repressed during stationary phase;BAT1 has a paralog, BAT2, that arose from the whole genome duplication	BAT1	43.6035		63797	29408	25291
YDL066W	P21954	Mitochondrial NADP-specific isocitrate dehydrogenase;catalyzes the oxidation of isocitrate to alpha-ketoglutarate;not required for mitochondrial respiration and may function to divert alpha-ketoglutarate to biosynthetic processes	IDP1	48.1969		59274	43915	40362
YHR179W	Q03558	Conserved NADPH oxidoreductase containing flavin mononucleotide (FMN);responsible for geraniol reduction into citronellol during fermentation;homologous to Oye3p with different ligand binding and catalytic properties;may be involved in sterol metabolism, oxidative stress response, and programmed cell death;protein abundance increases in response to DNA replication stress	OYE2	45.007		56946	37227	38031
YDR353W	P29509	Cytoplasmic thioredoxin reductase;key regulatory enzyme that determines the redox state of the thioredoxin system, which acts as a disulfide reductase system and protects cells against both oxidative and reductive stress;protein abundance increases in response to DNA replication stress;TRR1 has a paralog, TRR2, that arose from the whole genome duplication	TRR1	34.2334		56179	36531	41230	IMS/IM
YJR048W	P00044	Cytochrome c, isoform 1;also known as iso-1-cytochrome c;electron carrier of mitochondrial intermembrane space that transfers electrons from ubiquinone-cytochrome c oxidoreductase to cytochrome c oxidase during cellular respiration;CYC1 has a paralog, CYC7, that arose from the whole genome duplication;human homolog CYC1 can complement yeast null mutant;mutations in human CYC1 cause insulin-respon…	CYC1	12.1902		54146	207038	155053
YOL143C	P50861	Lumazine synthase (DMRL synthase);catalyzes synthesis of immediate precursor to riboflavin;DMRL synthase stands for 6,7-dimethyl-8-ribityllumazine synthase	RIB4	18.5527		53581	60394	59163	IMS/IM
YER057C	P40037	Member of the p14.5 protein family;functionally complements Mmf1p function when targeted to mitochondria;heat shock inducible;high-dosage growth inhibitor;forms a homotrimer in vitro;HMF1 has a paralog, MMF1, that arose from the whole genome duplication	HMF1	13.9021		53281	44098	64268	IMS/IM
YKL085W	P17505	Mitochondrial malate dehydrogenase;catalyzes interconversion of malate and oxaloacetate;involved in the tricarboxylic acid (TCA) cycle;phosphorylated	MDH1	35.6523		52987	256209	241340
YIL051C	P40185	Mitochondrial protein required for transamination of isoleucine;but not of valine or leucine;may regulate specificity of branched-chain transaminases Bat1p and Bat2p;induction of expression in response to stress is mediated by a Hog1p-regulated antisense RNA and gene looping;interacts genetically with mitochondrial ribosomal protein genes;MMF1 has a paralog, HMF1, that arose from the whole genome…	MMF1	15.9125		52672	43397	55119
YJR009C	P00358	Glyceraldehyde-3-phosphate dehydrogenase (GAPDH), isozyme 2;involved in glycolysis and gluconeogenesis;tetramer that catalyzes reaction of glyceraldehyde-3-phosphate to 1,3 bis-phosphoglycerate;detected in cytoplasm and cell wall;protein abundance increases in response to DNA replication stress;GAPDH-derived antimicrobial peptides are active against a wide variety of wine-related yeasts and bater…	TDH2	35.8452		52316	25417	32028	IMS/IM
YGR240C	P16861	Alpha subunit of heterooctameric phosphofructokinase;involved in glycolysis, indispensable for anaerobic growth, activated by fructose-2,6-bisphosphate and AMP, mutation inhibits glucose induction of cell cycle-related genes	PFK1	107.957		51546	32512	37910	Matrix/IM
YOR136W	P28241	Subunit of mitochondrial NAD(+)-dependent isocitrate dehydrogenase;complex catalyzes the oxidation of isocitrate to alpha-ketoglutarate in the TCA cycle;phosphorylated	IDH2	39.7439		50703	71660	65545
YNR001C	P00890	Citrate synthase;catalyzes the condensation of acetyl coenzyme A and oxaloacetate to form citrate;the rate-limiting enzyme of the TCA cycle;nuclear encoded mitochondrial protein;CIT1 has a paralog, CIT2, that arose from the whole genome duplication	CIT1	53.3625		49767	178977	179328
YPR191W	P07257	Subunit 2 of ubiquinol cytochrome-c reductase (Complex III);Complex III is a component of the mitochondrial inner membrane electron transport chain;phosphorylated;transcription is regulated by Hap1p, Hap2p/Hap3p, and heme	QCR2	40.4794		48948	143026	154636
YMR205C	P16862	Beta subunit of heterooctameric phosphofructokinase;involved in glycolysis;indispensable for anaerobic growth;activated by fructose-2,6-bisphosphate and AMP;mutation inhibits glucose induction of cell cycle-related genes	PFK2	104.611		48576	34624	36243	IMS/IM
YGL245W	P46655	Glutamyl-tRNA synthetase (GluRS);forms a complex with methionyl-tRNA synthetase (Mes1p) and Arc1p;complex formation increases the catalytic efficiency of both tRNA synthetases and ensures their correct localization to the cytoplasm;protein abundance increases in response to DNA replication stress	GUS1	80.8436		43982	32205	35130
YIL094C	P40495	Homo-isocitrate dehydrogenase;an NAD-linked mitochondrial enzyme required for the fourth step in the biosynthesis of lysine, in which homo-isocitrate is oxidatively decarboxylated to alpha-ketoadipate	LYS12	40.0714		43206	15758	17454
YDL126C	P25694	AAA ATPase;subunit of polyUb-selective segregase complex involved in ERAD, INM-associated degradation (INMAD), mitotic spindle disassembly, macroautophagy, PMN, ribosome-associated degradation, ribophagy, homotypic ER membrane fusion, SCF complex disassembly, cell wall integrity during heat stress, and telomerase regulation;mobilizes membrane-anchored transcription factors by regulated Ub/proteas…	CDC48	91.9548		43151	32116	43295
YJR016C	P39522	Dihydroxyacid dehydratase;catalyzes third step in the common pathway leading to biosynthesis of branched-chain amino acids	ILV3	62.8639		43051	24791	35443
YFR053C	P04806	Hexokinase isoenzyme 1;a cytosolic protein that catalyzes phosphorylation of glucose during glucose metabolism;expression is highest during growth on non-glucose carbon sources;glucose-induced repression involves hexokinase Hxk2p;HXK1 has a paralog, HXK2, that arose from the whole genome duplication	HXK1	53.7248		41868	159321	247479
YER178W	P16387	E1 alpha subunit of the pyruvate dehydrogenase (PDH) complex;catalyzes the direct oxidative decarboxylation of pyruvate to acetyl-CoA;phosphorylated;regulated by glucose;PDH complex is concentrated in spots within the mitochondrial matrix, often near the ERMES complex and near peroxisomes	PDA1	46.3466		41795	34244	40245	Matrix/IM
YBL045C	P07256	Core subunit of the ubiquinol-cytochrome c reductase complex;the ubiquinol-cytochrome c reductase complex (bc1 complex) is a component of the mitochondrial inner membrane electron transport chain	COR1	50.2273		41221	112414	126771
YMR083W	P07246	Mitochondrial alcohol dehydrogenase isozyme III;involved in the shuttling of mitochondrial NADH to the cytosol under anaerobic conditions and ethanol production	ADH3	40.375		40322	34200	34972
YFL018C	P09624	Dihydrolipoamide dehydrogenase;the lipoamide dehydrogenase component (E3) of the pyruvate dehydrogenase and 2-oxoglutarate dehydrogenase multi-enzyme complexes;PDH complex is concentrated in spots within the mitochondrial matrix, often near the ERMES complex and near peroxisomes;LPD1 has a paralog, IRC15, that arose from the whole genome duplication	LPD1	54.0127		40084	77284	97061
YBR221C	P32473	E1 beta subunit of the pyruvate dehydrogenase (PDH) complex;PDH is an evolutionarily conserved multi-protein complex found in mitochondria	PDB1	40.0449		39503	36493	38344
YNL037C	P28834	Subunit of mitochondrial NAD(+)-dependent isocitrate dehydrogenase;complex catalyzes the oxidation of isocitrate to alpha-ketoglutarate in the TCA cycle	IDH1	39.3285		39415	72172	66646
YCL009C	P25605	Regulatory subunit of acetolactate synthase;acetolactate synthase catalyzes the first step of branched-chain amino acid biosynthesis;enhances activity of the Ilv2p catalytic subunit, localizes to mitochondria	ILV6	33.9822		38492	25953	34844	Matrix/IM
YAL044C	P39726	H subunit of the mitochondrial glycine decarboxylase complex;glycine decarboxylase is required for the catabolism of glycine to 5,10-methylene-THF;also required for all protein lipoylation;expression is regulated by levels of 5,10-methylene-THF	GCV3	18.7821		38381	16705	28340
YBR121C	P38088	Cytoplasmic and mitochondrial glycyl-tRNA synthase;ligates glycine to the cognate anticodon-bearing tRNA;transcription termination factor that may interact with the 3'-end of pre-mRNA to promote 3'-end formation;GRS1 has a paralog, GRS2, that arose from the whole genome duplication;human homolog GARS implicated in Charcot-Marie-Tooth disease, can complement yeast null mutant	GRS1	75.3254		38144	31486	29782	Matrix/IM
YLR043C	P22217	Cytoplasmic thioredoxin isoenzyme;part of thioredoxin system which protects cells against oxidative and reductive stress;forms LMA1 complex with Pbi2p;acts as a cofactor for Tsa1p;required for ER-Golgi transport and vacuole inheritance;with Trx2p, facilitates mitochondrial import of small Tims Tim9p, Tim10p, Tim13p by maintaining them in reduced form;abundance increases iunder DNA replication str…	TRX1	11.2321		37426	37269	46825	IMS/IM
YKL067W	P36010	Nucleoside diphosphate kinase;catalyzes the transfer of gamma phosphates from nucleoside triphosphates, usually ATP, to nucleoside diphosphates by a mechanism that involves formation of an autophosphorylated enzyme intermediate;protein abundance increases in response to DNA replication stress	YNK1	17.1689		36760	107627	110802	IMS/IM
YPL271W	P21306	Epsilon subunit of the F1 sector of mitochondrial F1F0 ATP synthase;which is a large, evolutionarily conserved enzyme complex required for ATP synthesis;F1 translationally regulates ATP6 and ATP8 expression to achieve a balanced output of ATP synthase genes encoded in nucleus and mitochondria;phosphorylated	ATP15	6.7467		34843	121414	137755
YEL020W-A	O74700	Essential protein of the mitochondrial intermembrane space;forms a complex with Tim10p (TIM10 complex) that delivers hydrophobic proteins to the TIM22 complex for insertion into the inner membrane	TIM9	10.2038		34592	42535	40194	IMS/IM
YMR108W	P07342	Acetolactate synthase;catalyses the first common step in isoleucine and valine biosynthesis and is the target of several classes of inhibitors, localizes to the mitochondria;expression of the gene is under general amino acid control	ILV2	74.9417		34014	21021	21287	Matrix/IM
YJR077C	P23641	Mitochondrial phosphate carrier;imports inorganic phosphate into mitochondria;functionally redundant with Pic2p but more abundant than Pic2p under normal conditions;phosphorylated	MIR1	32.8214		32590	99738	101566	Matrix/IM
YMR241W	Q04013	Citrate and oxoglutarate carrier protein;exports citrate from and imports oxoglutarate into the mitochondrion, causing net export of NADPH reducing equivalents;also associates with mt nucleoids and has a role in replication and segregation of the mt genome	YHM2	34.2031		31970	21237	18852	IMS/IM
YHR008C	P00447	Mitochondrial manganese superoxide dismutase;protects cells against oxygen toxicity and oxidative stress;human mitochondrial SOD2 can complement a yeast null mutant and human cytoplasmic SOD1 can also complement when targeted to the mitochondrial matrix	SOD2	25.7764		30868	64279	99005
YMR072W	Q02486	Mitochondrial DNA-binding protein;involved in mitochondrial DNA replication and recombination, member of HMG1 DNA-binding protein family;activity may be regulated by protein kinase A phosphorylation;ABF2 has a paralog, IXR1, that arose from the whole genome duplication;human homolog TFAM can complement yeast abf2 mutant, rescuing the loss-of-mitochondrial DNA phenotype in a yeast abf2 strain	ABF2	21.575		29839	32339	50262	Matrix/IM
YOR142W	P53598	Alpha subunit of succinyl-CoA ligase;succinyl-CoA ligase is a mitochondrial enzyme of the TCA cycle that catalyzes the nucleotide-dependent conversion of succinyl-CoA to succinate;phosphorylated	LSC1	35.0358		28009	48220	65946
YNL071W	P12695	Dihydrolipoamide acetyltransferase component (E2) of the PDC;the pyruvate dehydrogenase complex (PDC) catalyzes the oxidative decarboxylation of pyruvate to acetyl-CoA	LAT1	51.8197		27618	24590	28504	Matrix/IM
YGR094W	P07806	Mitochondrial and cytoplasmic valyl-tRNA synthetase;human homolog VARS2 implicated in mitochondrial diseases, can partially complement yeast null mutant	VAS1	125.765		27387	16318	23615	Matrix/IM
YOR335C	P40825	Cytoplasmic and mitochondrial alanyl-tRNA synthetase;required for protein synthesis;point mutation (cdc64-1 allele) causes cell cycle arrest at G1;lethality of null mutation is functionally complemented by human homolog AARS;mutations in human homolog AARS are associated with autoimmune disease polymyositis/dermatomyositis	ALA1	107.253		27345	17756	16147	Matrix/IM
YNL104C	P06208	Alpha-isopropylmalate synthase (2-isopropylmalate synthase);the main isozyme responsible for the first step in the leucine biosynthesis pathway;LEU4 has a paralog, LEU9, that arose from the whole genome duplication	LEU4	68.3986		27297	17307	37970
YGL187C	P04037	Subunit IV of cytochrome c oxidase;the terminal member of the mitochondrial inner membrane electron transport chain;precursor N-terminal 25 residues are cleaved during mitochondrial import;phosphorylated;spermidine enhances translation	COX4	17.1418		25566	71933	91731
YBR263W	P37292	Mitochondrial serine hydroxymethyltransferase;converts serine to glycine plus 5,10 methylenetetrahydrofolate;involved in generating precursors for purine, pyrimidine, amino acid, and lipid biosynthesis;reverse reaction generates serine	SHM1	53.693		24668	22362	28569
YBR035C	P38075	Pyridoxine (pyridoxamine) phosphate oxidase;has homologs in E. coli and Myxococcus xanthus;transcription is under the general control of nitrogen metabolism	PDX3	26.9085		24473	20851	25903	IMS/IM
YIR037W	P40581	Thiol peroxidase;functions as a hydroperoxide receptor to sense intracellular hydroperoxide levels and transduce a redox signal to the Yap1p transcription factor;HYR1 has a paralog, GPX1, that arose from the whole genome duplication	HYR1	18.6436		24199	20031	34737
YFR044C	P43616	Cys-Gly metallo-di-peptidase;forms a complex with Dug2p and Dug3p to degrade glutathione (GSH) and other peptides containing a gamma-glu-X bond in an alternative pathway to GSH degradation by gamma-glutamyl transpeptidase (Ecm38p);human homolog CNDP2 can complement yeast dug1 mutant	DUG1	52.8607		23519	22883	28032
YCR028C-A	P32445	ssDNA-binding protein essential for mitochondrial genome maintenance;involved in mitochondrial DNA replication;stimulates utilization by Mip1p DNA polymerase of RNA primers synthesized by Rpo41p	RIM1	15.3873		23149	29235	39087
YOR187W	P02992	Mitochondrial translation elongation factor Tu (EF-Tu);involved in fundamental pathway of mtDNA homeostasis;comprises both GTPase and guanine nucleotide exchange factor activities, while these activities are found in separate proteins in S. pombe and humans;rare mutations in human mitochondrial elongation factor Tu (EFTu) associated with severe lactic acidosis, rapidly progressive fatal encephalo…	TUF1	47.9667		21900	40786	38393	Matrix/IM
YKL150W	P36060	Mitochondrial NADH-cytochrome b5 reductase;involved in ergosterol biosynthesis	MCR1	34.1412		21471	42188	66078	OM
YDR513W	P17695	Cytoplasmic glutaredoxin;thioltransferase, glutathione-dependent disulfide oxidoreductase involved in maintaining redox state of target proteins, also exhibits glutathione peroxidase activity, expression induced in response to stress;GRX2 has two in-frame start codons resulting in a shorter isoform that is retained in the cytosol and a longer form translocated to the mitochondrial matrix;GRX2 has…	GRX2	15.8616		20955	23125	45430
YJL200C	P39533	Putative mitochondrial aconitase isozyme;similarity to Aco1p, an aconitase required for the TCA cycle;expression induced during growth on glucose, by amino acid starvation via Gcn4p, and repressed on ethanol	ACO2	86.5801		20667	3358	4112
YDR529C	P00128	Subunit 7 of ubiquinol cytochrome-c reductase (Complex III);Complex III is a component of the mitochondrial inner membrane electron transport chain;oriented facing the mitochondrial matrix;N-terminus appears to play a role in complex assembly	QCR7	14.5619		19642	60902	82753
YDR298C	P09457	Subunit 5 of the stator stalk of mitochondrial F1F0 ATP synthase;F1F0 ATP synthase is a large, evolutionarily conserved enzyme complex required for ATP synthesis;homologous to bovine subunit OSCP (oligomycin sensitivity-conferring protein);phosphorylated	ATP5	22.8237		19320	67762	75830
YBL064C	P34227	Mitochondrial peroxiredoxin with thioredoxin peroxidase activity;has a role in reduction of hydroperoxides;reactivation requires Trr2p and glutathione;induced during respiratory growth and oxidative stress;phosphorylated;protein abundance increases in response to DNA replication stress	PRX1	29.5011		18957	38958	75737
YPL262W	P08417	Fumarase;converts fumaric acid to L-malic acid in the TCA cycle;cytosolic and mitochondrial distribution determined by the N-terminal targeting sequence, protein conformation, and status of glyoxylate shunt;phosphorylated in mitochondria	FUM1	53.1565		18946	47289	52344
YGR244C	P53312	Beta subunit of succinyl-CoA ligase;succinyl-CoA ligase is a mitochondrial enzyme of the TCA cycle that catalyzes the nucleotide-dependent conversion of succinyl-CoA to succinate	LSC2	46.9012		18849	35655	55877
YER086W	P00927	Threonine deaminase, catalyzes first step in isoleucine biosynthesis;expression is under general amino acid control;ILV1 locus exhibits highly positioned nucleosomes whose organization is independent of known ILV1 regulation	ILV1	63.8369		18755	10300	12772	Matrix/IM
YDR487C	Q99258	3,4-dihydroxy-2-butanone-4-phosphate synthase (DHBP synthase);required for riboflavin biosynthesis from ribulose-5-phosphate, also has an unrelated function in mitochondrial respiration	RIB3	22.561		18590	13454	13672
YHR005C-A	P87108	Essential protein of the mitochondrial intermembrane space;forms a complex with Tim9p (TIM10 complex) that delivers hydrophobic proteins to the TIM22 complex for insertion into the inner membrane	TIM10	10.3038		18432	26941	26124	IMS/IM
YML078W	P25719	Mitochondrial peptidyl-prolyl cis-trans isomerase (cyclophilin);catalyzes the cis-trans isomerization of peptide bonds N-terminal to proline residues;involved in protein refolding after import into mitochondria	CPR3	19.922		18387	26728	25044
YHR051W	P00427	Subunit VI of cytochrome c oxidase (Complex IV);Complex IV is the terminal member of the mitochondrial inner membrane electron transport chain;expression is regulated by oxygen levels	COX6	17.3398		18309	60651	66753
YMR203W	P23644	Component of the TOM (translocase of outer membrane) complex;responsible for recognition and initial import steps for all mitochondrially directed proteins;constitutes the core element of the protein conducting pore;pre-Tom40p is phosphorylated by PKA, which impairs its import into mitochondria under non-respiratory conditions	TOM40	42.0328		17827	18644	19562	IMS/IM
YKL029C	P36013	Mitochondrial malic enzyme;catalyzes the oxidative decarboxylation of malate to pyruvate, which is a key intermediate in sugar metabolism and a precursor for synthesis of several amino acids	MAE1	74.3809		17789	5230	5552	Matrix/IM
YMR062C	Q04728	Mitochondrial ornithine acetyltransferase;catalyzes the fifth step in arginine biosynthesis;also possesses acetylglutamate synthase activity, regenerates acetylglutamate while forming ornithine	ARG7	47.8493		17692	7452	11964
YDL181W	P01097	Protein that inhibits ATP hydrolysis by the F1F0-ATP synthase;inhibitory function is enhanced by stabilizing proteins Stf1p and Stf2p;has a calmodulin-binding motif and binds calmodulin in vitro;INH1 has a paralog, STF1, that arose from the whole genome duplication	INH1	9.8764		17623	68696	91006	Matrix/IM
YIL125W	P20967	Subunit of the mitochondrial alpha-ketoglutarate dehydrogenase complex;catalyzes a key step in the tricarboxylic acid (TCA) cycle, the oxidative decarboxylation of alpha-ketoglutarate to form succinyl-CoA	KGD1	114.412		17460	49521	67425
YOL140W	P18544	Acetylornithine aminotransferase;catalyzes the fourth step in the biosynthesis of the arginine precursor ornithine	ARG8	46.6819		17391	10322	14145
YPR033C	P07263	Cytoplasmic and mitochondrial histidine tRNA synthetase;efficient mitochondrial localization requires both a presequence and an amino-terminal sequence;mutations in human ortholog HARS2 are associated with Perrault syndrome	HTS1	59.9542		17233	12902	10699	Matrix/IM
YPL091W	P41921	Cytosolic and mitochondrial glutathione oxidoreductase;converts oxidized glutathione to reduced glutathione;cytosolic Glr1p is the main determinant of the glutathione redox state of the mitochondrial intermembrane space;mitochondrial Glr1p has a role in resistance to hyperoxia;protein abundance increases in response to DNA replication stress	GLR1	53.4425		17034	12174	14368
YOR241W	Q08645	Folylpolyglutamate synthetase;catalyzes extension of the glutamate chains of the folate coenzymes, required for methionine synthesis and for maintenance of mitochondrial DNA;protein abundance increases in response to DNA replication stress	MET7	62.1601		16993	7470	9639	Matrix/IM
YBR039W	P38077	Gamma subunit of the F1 sector of mitochondrial F1F0 ATP synthase;F1F0 ATP synthase is a large, evolutionarily conserved enzyme complex required for ATP synthesis	ATP3	34.36		16268	52764	57327	Matrix/IM
YPR133W-A	P80967	Component of the TOM (translocase of outer membrane) complex;responsible for recognition and initial import of all mitochondrially directed proteins;involved in transfer of precursors from the Tom70p and Tom20p receptors to the Tom40p pore	TOM5	5.986		15889	19245	18087	OM
YNL131W	P49334	Component of the TOM (Translocase of Outer Membrane) complex;responsible for initial import of mitochondrially directed proteins;mediates interaction between TOM and TIM complexes and acts as a receptor for precursor proteins	TOM22	16.7705		15830	14111	14439	OM
YNL121C	P07213	Component of the TOM (translocase of outer membrane) complex;involved in the recognition and initial import steps for all mitochondrially directed proteins;acts as a receptor for incoming precursor proteins;TOM70 has a paralog, TOM71, that arose from the whole genome duplication	TOM70	70.1107		15742	15101	15393	OM
YOR347C	P52489	Pyruvate kinase;appears to be modulated by phosphorylation;transcription repressed by glucose, and Pyk2p may be active under low glycolytic flux;PYK2 has a paralog, CDC19, that arose from the whole genome duplication	PYK2	55.1929		15307	9801	13643
YDL029W	P32381	Essential component of the Arp2/3 complex;Arp2/3 is a highly conserved actin nucleation center required for the motility and integrity of actin patches;involved in endocytosis and membrane growth and polarity;required for efficient Golgi-to-ER trafficking in COPI mutants	ARP2	44.0659		15264	14927	17584
YOR232W	P38523	Mitochondrial matrix cochaperone;nucleotide release factor for Ssc1p in protein translocation and folding;also acts as cochaperone for Ssq1p in folding of Fe-S cluster proteins;acts as oxidative sensor to regulate mitochondrial Ssc1p;in presence of oxidative stress, dimeric Mge1p becomes a monomer and unable to regulate Ssc1p function;homolog of E. coli GrpE and human Mge1 (GRPEL1), which also re…	MGE1	26.0678		15073	14415	14605	Matrix/IM
YIL062C	P40518	Subunit of the ARP2/3 complex;ARP2/3 is required for the motility and integrity of cortical actin patches;has mRNA binding activity	ARC15	17.1316		14195	12778	16124
YHL021C	P23180	Protein of unknown function;the authentic, non-tagged protein is detected in highly purified mitochondria in high-throughput studies;null mutant displays reduced frequency of mitochondrial genome loss	AIM17	53.1353		13913	8533	9294
YGL256W	P10127	Alcohol dehydrogenase isoenzyme type IV;dimeric enzyme demonstrated to be zinc-dependent despite sequence similarity to iron-activated alcohol dehydrogenases;transcription is induced in response to zinc deficiency	ADH4	41.1335		13903	1004	1193
YOR168W	P13188	Glutamine tRNA synthetase;monomeric class I tRNA synthetase that catalyzes the specific glutaminylation of tRNA(Gln);N-terminal domain proposed to be involved in enzyme-tRNA interactions	GLN4	93.1408		13678	9656	10414
YIL136W	P16547	Mitochondrial outer membrane protein of unknown function;major constituent of the outer membrane, extending into the intermembrane space;interacts with porin (Por1p) and with Om14p;imported via the presequence pathway involving the TOM and TIM23 complexes, then assembled in the outer membrane by Mim1p;protein abundance increases in response to DNA replication stress	OM45	44.584		13463	25053	122294	IMS/IM
YDR322C-A	P81449	Subunit e of mitochondrial F1F0-ATPase;ATPase is a large, evolutionarily conserved enzyme complex required for ATP synthesis;essential for the dimeric and oligomeric state of ATP synthase, which in turn determines the shape of inner membrane cristae	TIM11	10.8746		13424	37127	41242	IMS/IM
YER073W	P40047	Mitochondrial aldehyde dehydrogenase;involved in regulation or biosynthesis of electron transport chain components and acetate formation;activated by K+;utilizes NADP+ as the preferred coenzyme;constitutively expressed	ALD5	56.6964		13416	6365	9350
YDL198C	P38988	Mitochondrial GTP/GDP transporter;essential for mitochondrial genome maintenance;has a role in mitochondrial iron transport;member of the mitochondrial carrier family	GGC1	33.2349		13200	8558	9324
YOL038W	P40303	Alpha 4 subunit of the 20S proteasome;may replace alpha 3 subunit (Pre9p) under stress conditions to create a more active proteasomal isoform;GFP-fusion protein relocates from cytosol to the mitochondrial surface upon oxidative stress	PRE6	28.4394		12984	10791	13250
YER004W	P40008	Protein of unknown function;localized to the mitochondrial outer membrane;induced by treatment with 8-methoxypsoralen and UVA irradiation	FMP52	25.0922		12822	11948	24630	Matrix/IM
YMR145C	P40215	Mitochondrial external NADH dehydrogenase;type II NAD(P)H:quinone oxidoreductase that catalyzes the oxidation of cytosolic NADH;Nde1p and Nde2p provide cytosolic NADH to the mitochondrial respiratory chain;NDE1 has a paralog, NDE2, that arose from the whole genome duplication	NDE1	62.7898		12683	26652	18277	IMS/IM
YOL059W	P41911	NAD-dependent glycerol 3-phosphate dehydrogenase;expression is controlled by an oxygen-independent signaling pathway required to regulate metabolism under anoxic conditions;located in cytosol and mitochondria;constitutively active but is inactivated via phosphorylation by energy-stress responsive kinase SNF1;GPD2 has a paralog, GPD1, that arose from the whole genome duplication	GPD2	49.4182		12623	5647	7182
YPL059W	Q02784	Glutathione-dependent oxidoreductase;mitochondrial matrix protein involved at an early step in the biogenesis of iron-sulfur centers along with Bol1p;hydroperoxide and superoxide-radical responsive;monothiol glutaredoxin subfamily member along with Grx3p and Grx4p	GRX5	16.9256		12541	14135	17790	Matrix/IM
YGL221C	P53081	Protein of unknown function;similar to Listeria monocytogenes major sigma factor (rpoD gene product);the authentic, non-tagged protein is detected in highly purified mitochondria in high-throughput studies	NIF3	31.8888		12395	9160	9966
YBR026C	P38071	2-enoyl thioester reductase;member of the medium chain dehydrogenase/reductase family;localized to mitochondria, where it has a probable role in fatty acid synthesis;human MECR functionally complements the respiratory growth defect of the null mutant	ETR1	42.0743		12303	14877	34684
YHR049W	P38777	Putative serine hydrolase;localizes to both the nucleus and cytoplasm;sequence is similar to S. cerevisiae Fsh2p and Fsh3p and the human candidate tumor suppressor OVCA2	FSH1	27.3344		12283	8191	6392
YGR193C	P16451	E3-binding protein of the mitochondrial pyruvate dehydrogenase complex;plays a structural role in the complex by binding and positioning dihydrolipoamide dehydrogenase (E3) to the dihydrolipoamide acetyltransferase (E2) core	PDX1	45.3561		12199	7024	8450	Matrix/IM
YML128C	Q03104	Protein of unknown function;mutant is defective in directing meiotic recombination events to homologous chromatids;the authentic, non-tagged protein is detected in highly purified mitochondria and is phosphorylated	MSC1	59.589		11929	6355	52709	IMS/IM
YBR111C	Q01976	Nudix hydrolase family member with ADP-ribose pyrophosphatase activity;shown to metabolize O-acetyl-ADP-ribose to AMP and acetylated ribose 5'-phosphate	YSA1	26.0853		11884	8091	11778
YDR234W	P49367	Homoaconitase;catalyzes the conversion of homocitrate to homoisocitrate, which is a step in the lysine biosynthesis pathway	LYS4	75.1505		11833	3311	3063	Matrix/IM
YFR004W	P43588	Metalloprotease subunit of 19S regulatory particle;part of 26S proteasome lid;couples the deubiquitination and degradation of proteasome substrates;involved, independent of catalytic activity, in fission of mitochondria and peroxisomes;protein abundance increases in response to DNA replication stress	RPN11	34.3927		11674	9190	10582
YNR017W	P32897	Essential component of the TIM23 complex;involved in protein import into mitochondrial matrix and inner membrane;with Tim17p, contributes to architecture and function of the import channel;TIM23 complex is short for the translocase of the inner mitochondrial membrane	TIM23	23.2438		11590	12913	11468	IMS/IM
YNL247W	P53852	Cysteinyl-tRNA synthetase;may interact with ribosomes, based on co-purification experiments;human gene CARS allows growth of the yeast haploid null mutant after sporulation of a heterozygous diploid		87.526		11463	8869	8814	Matrix/IM
YLL041C	P21801	Iron-sulfur protein subunit of succinate dehydrogenase;the complex couples the oxidation of succinate to the transfer of electrons to ubiquinone as part of the TCA cycle and the mitochondrial respiratory chain;other members are Sdh1p, Sdh3p, and Sdh4p	SDH2	30.2448		11429	64781	85568	Matrix/IM
YFR033C	P00127	Subunit 6 of the ubiquinol cytochrome-c reductase complex;the complex, also known as the cytochrome bc(1) complex or Complex III, is a component of the mitochondrial inner membrane electron transport chain;highly acidic protein;required for maturation of cytochrome c1;may be loosely associated with the complex since it is easily released into the intermembrane space	QCR6	17.2109		11400	22198	21131	Matrix/IM
YKL157W	P32454	Aminopeptidase yscII;may have a role in obtaining leucine from dipeptide substrates;APE2 has a paralog, AAP1, that arose from the whole genome duplication	APE2	107.759		11257	8997	15901
YOR271C	Q12029	Putative protein;predicted to be an alpha-isopropylmalate carrier;belongs to the sideroblastic-associated protein family;non-tagged protein is detected in purified mitochondria;likely to play a role in iron homeostasis	FSF1	35.4277		11250	8177	8923
YGR132C	P40961	Subunit of the prohibitin complex (Phb1p-Phb2p);prohibitin is a 1.2 MDa ring-shaped inner mitochondrial membrane chaperone that stabilizes newly synthesized proteins;determinant of replicative life span;involved in mitochondrial segregation;prohibitin deficiency induces a mitochondrial unfolded protein response (mtUPR)	PHB1	31.4283		11107	14163	15985
YDL174C	P32891	Major mitochondrial D-lactate dehydrogenase;oxidizes D-lactate to pyruvate, transcription is heme-dependent, repressed by glucose, and derepressed in ethanol or lactate;located in the mitochondrial inner membrane	DLD1	65.2883		11083	11349	18752	IMS/IM
YOR065W	P07143	Cytochrome c1;component of the mitochondrial respiratory chain;expression is regulated by the heme-activated, glucose-repressed Hap2p/3p/4p/5p CCAAT-binding complex	CYT1	34.0569		10878	32312	34499
YER069W	Q01217	Acetylglutamate kinase and N-acetyl-gamma-glutamyl-phosphate reductase;N-acetyl-L-glutamate kinase (NAGK) catalyzes the 2nd and N-acetyl-gamma-glutamyl-phosphate reductase (NAGSA), the 3rd step in arginine biosynthesis;synthesized as a precursor which is processed in the mitochondrion to yield mature NAGK and NAGSA;enzymes form a metabolon complex with Arg2p;NAGK C-terminal domain stabilizes the …	ARG5,6	94.8752		10690	6698	14984	Matrix/IM
YDR019C	P48015	T subunit of the mitochondrial glycine decarboxylase complex;glycine decarboxylase is required for the catabolism of glycine to 5,10-methylene-THF;expression is regulated by levels of levels of 5,10-methylene-THF in the cytoplasm	GCV1	44.4755		10666	2485	5172
YKL040C	P32860	Protein involved in Fe-S cluster transfer to mitochondrial clients;protects [4Fe-4S] clusters from damage due to oxidative stress;acts along with Bol3 at a late step in the transfer of [4Fe-4S] clusters from the ISA complex to client proteins;Fe-S loaded homodimer at steady state;similar to NifU, a bacterial protein required for Fe/S cluster maturation;ortholog of the human NFU1, mutations of whi…	NFU1	29.1594		10527	10225	12490	Matrix/IM
YKL016C	P30902	Subunit d of the stator stalk of mitochondrial F1F0 ATP synthase;F1F0 ATP synthase is a large, evolutionarily conserved enzyme complex required for ATP synthesis	ATP7	19.8128		10468	34829	40938
YBL015W	P32316	Protein with CoA transferase activity;particularly for CoASH transfer from succinyl-CoA to acetate;has minor acetyl-CoA-hydrolase activity;phosphorylated;required for acetate utilization and for diploid pseudohyphal growth	ACH1	58.7055		10348	38180	52593
YPL078C	P05626	Subunit b of the stator stalk of mitochondrial F1F0 ATP synthase;ATP synthase is a large, evolutionarily conserved enzyme complex required for ATP synthesis;contributes to the oligomerization of the complex, which in turn determines the shape of inner membrane cristae;phosphorylated	ATP4	26.9304		10307	32452	40666
YDR148C	P19262	Dihydrolipoyl transsuccinylase;component of the mitochondrial alpha-ketoglutarate dehydrogenase complex, which catalyzes the oxidative decarboxylation of alpha-ketoglutarate to succinyl-CoA in the TCA cycle;phosphorylated	KGD2	50.4363		10212	41498	51300	Matrix/IM
YKR042W	P36135	Mitochondrial inner membrane protein;role in mitophagy is disputed;implicated in cell wall biogenesis, the oxidative stress response, life span during starvation, and cell death;SUN family member;UTH1 has a paralog, NCA3, that arose from the whole genome duplication	UTH1	36.9426		10170	5750	13665
YPR020W	Q12233	Subunit g of the mitochondrial F1F0 ATP synthase;reversibly phosphorylated on two residues;unphosphorylated form is required for dimerization of the ATP synthase complex, which in turn determines oligomerization of the complex and the shape of inner membrane cristae	ATP20	12.9323		10007	35632	39888	Matrix/IM
YER048W-A	Q6Q560	Cysteine desulfurase (Nfs1p) activator;essential for the formation of the persulfide intermediate at the desulfurase active site during pyridoxal phosphate-dependent desulfuration of cysteine;required for mitochondrial iron-sulfur cluster biosynthesis;exclusive to eukaryotes, implicated as eukaryotic supplement to the bacterium-derived Fe-S cluster (ISC) assembly apparatus;involved in regulation …	ISD11	11.2763		9949	8497	12479
YML081C-A	P81450	Subunit of the mitochondrial F1F0 ATP synthase;F1F0 ATP synthase is a large, evolutionarily conserved enzyme complex required for ATP synthesis;termed subunit I or subunit j;does not correspond to known ATP synthase subunits in other organisms	ATP18	6.6919		9709	26860	37910	IMS/IM
YJL166W	P08525	Subunit 8 of ubiquinol cytochrome-c reductase (Complex III);Complex III is a component of the mitochondrial inner membrane electron transport chain;oriented facing the intermembrane space;expression is regulated by Abf1p and Cpf1p	QCR8	10.9807		9641	7987	10020
YML086C	P54783	D-Arabinono-1,4-lactone oxidase;catalyzes the final step in biosynthesis of dehydro-D-arabinono-1,4-lactone, which is protective against oxidative stress	ALO1	59.4912		9481	7764	9933	OM
YDL004W	Q12165	Delta subunit of the central stalk of mitochondrial F1F0 ATP synthase;F1F0 ATP synthase is a large, evolutionarily conserved enzyme complex required for ATP synthesis;F1 translationally regulates ATP6 and ATP8 expression to achieve a balanced output of ATP synthase genes encoded in nucleus and mitochondria;phosphorylated	ATP16	17.0196		9365	29497	32845
YCR046C	P25626	Mitochondrial ribosomal protein of the large subunit;required for respiration and for maintenance of the mitochondrial genome	IMG1	19.4121		9244	5245	3360	Matrix/IM
YKL120W	P32332	Mitochondrial inner membrane transporter;transports oxaloacetate, sulfate, thiosulfate, and isopropylmalate;member of the mitochondrial carrier family	OAC1	35.1665		9227	3104	2571	Matrix/IM
YHR001W-A	P37299	Subunit of the ubiqunol-cytochrome c oxidoreductase complex;this complex comprises part of the mitochondrial respiratory chain;members include Cobp, Rip1p, Cyt1p, Cor1p, Qcr2p, Qcr6p, Qcr7p, Qcr8p, Qcr9p, and Qcr10p and comprises part of the mitochondrial respiratory chain	QCR10	8.594		9215	29855	44548
YEL024W	P08067	Ubiquinol-cytochrome-c reductase;a Rieske iron-sulfur protein of the mitochondrial cytochrome bc1 complex;transfers electrons from ubiquinol to cytochrome c1 during respiration;during import, Rip1p is first imported into the mitochondrial matrix where it is processed, acquires its Fe-S cluster, and is folded, then is translocated into the inner membrane by the action of a homo-oligomer of Bcs1p, …	RIP1	23.3673		9128	22364	35070
YNL098C	P01120	GTP-binding protein;regulates nitrogen starvation response, sporulation, and filamentous growth;farnesylation and palmitoylation required for activity and localization to plasma membrane;homolog of mammalian Ras proto-oncogenes;RAS2 has a paralog, RAS1, that arose from the whole genome duplication	RAS2	34.7057		9073	5424	11183	Matrix/IM
YJR135W-A	P57744	Mitochondrial intermembrane space protein;forms a complex with Tim13p that delivers a subset of hydrophobic proteins to the TIM22 complex for inner membrane insertion;homolog of human TIMM8A, implicated in Mohr-Tranebjaerg syndrome, also known as deafness-dystonia-optic neuronopathy (DDON) syndrome;human TIMM8A can complement yeast null mutant	TIM8	9.7621		9049	10031	11120	IMS/IM
YLR370C	Q05933	Subunit of the ARP2/3 complex;ARP2/3 is required for the motility and integrity of cortical actin patches	ARC18	20.5798		9021	7244	9212
YGR207C	P42940	Mitochondrial protein that interacts with frataxin (Yfh1p);putative ortholog of mammalian electron transfer flavoprotein complex subunit ETF-beta;may have a role in oxidative stress response	CIR1	28.762		8999	8844	9272
YFR049W	P19955	Subunit of the mitochondrial alpha-ketoglutarate dehydrogenase;recruits E3 subunit (Lpd1p) to the E1-E2 (Kgd1p, Kgd2p) core;has similarity to human mitochondrial ribosomal protein MRP-S36	YMR31	13.6952		8900	29945	37992	Matrix/IM
YGR231C	P50085	Subunit of the prohibitin complex (Phb1p-Phb2p);prohibitin is a 1.2 MDa ring-shaped inner mitochondrial membrane chaperone that stabilizes newly synthesized proteins;determinant of replicative life span;involved in mitochondrial segregation;prohibitin deficiency induces a mitochondrial unfolded protein response (mtUPR)	PHB2	34.4201		8710	10848	11754	Matrix/IM
YNL070W	P53507	Component of the TOM (translocase of outer membrane) complex;responsible for recognition and initial import steps for all mitochondrially directed proteins;promotes assembly and stability of the TOM complex	TOM7	6.871		8701	10426	9422
YOR176W	P16622	Ferrochelatase;a mitochondrial inner membrane protein, catalyzes insertion of ferrous iron into protoporphyrin IX, the eighth and final step in the heme biosynthetic pathway;human homolog FECH can complement yeast mutant and allow growth of haploid null after sporulation of a heterozygous diploid	HEM15	44.6046		8593	8397	11302	Matrix/IM
YDL130W-A	P01098	Protein involved in regulation of the mitochondrial F1F0-ATP synthase;Stf1p and Stf2p act as stabilizing factors that enhance inhibitory action of the Inh1p protein;protein abundance increases in response to DNA replication stress;STF1 has a paralog, INH1, that arose from the whole genome duplication	STF1	10.0697		8552	21046	34206	Matrix/IM
YMR056C	P04710	Mitochondrial inner membrane ADP/ATP translocator;exchanges cytosolic ADP for mitochondrially synthesized ATP;phosphorylated;Aac1p is a minor isoform while Pet9p is the major ADP/ATP translocator;relocalizes from mitochondrion to cytoplasm upon DNA replication stress	AAC1	34.137		8485	22331	27574	IMS/IM
YGR181W	P53299	Mitochondrial intermembrane space protein;forms a complex with Tim8p that delivers a subset of hydrophobic proteins to the TIM22 complex for insertion into the inner membrane	TIM13	11.288		8461	9287	9389	IMS/IM
YKR066C	P00431	Mitochondrial cytochrome-c peroxidase;degrades reactive oxygen species in mitochondria, involved in the response to oxidative stress	CCP1	40.3483		8440	9619	18188	IMS/IM
YML120C	P32340	NADH:ubiquinone oxidoreductase;transfers electrons from NADH to ubiquinone in respiratory chain but does not pump protons, in contrast to higher eukaryotic multisubunit respiratory complex I;upon apoptotic stress, is activated in mitochondria by N-terminal cleavage, then translocates to cytoplasm to induce apoptosis;homolog of human AIFM2;yeast NDI1 complements several phenotypes of human cell li…	NDI1	57.2644		8376	39109	42591
YIL124W	P40471	Bifunctional triacylglycerol lipase and 1-acyl DHAP reductase;NADPH-dependent 1-acyl dihydroxyacetone phosphate reductase involved in phosphatidic acid biosynthesis;lipid droplet triacylglycerol lipase involved in the mobilization of non-polar lipids;found in lipid particles, the endoplasmic reticulum and the mitochondrial outer membrane;required for spore germination;role in cell wall biosynthes…	AYR1	32.8233		8367	9063	15500	OM
YOL077W-A	P81451	Subunit k of the mitochondrial F1F0 ATP synthase;F1F0 ATP synthase is a large, evolutionarily conserved enzyme complex required for ATP synthesis;associated only with the dimeric form of ATP synthase	ATP19	7.5359		8122	28471	30727	IMS/IM
YKR016W	P36112	Component of the MICOS complex;MICOS (formerly MINOS or MitOS) is a mitochondrial inner membrane complex that extends into the intermembrane space and has a role in the maintenance of crista junctions, inner membrane architecture, and formation of contact sites to the outer membrane;Mic60p is also involved in import of intermembrane space (IMS) proteins, probably by positioning Mia40p relative to…	MIC60	61.0798		7967	16474	17875	IMS/IM
YDR258C	P33416	Oligomeric mitochondrial matrix chaperone;cooperates with Ssc1p in mitochondrial thermotolerance after heat shock;able to prevent the aggregation of misfolded proteins as well as resolubilize protein aggregates	HSP78	91.3403		7950	7984	12128	Matrix/IM
YCL017C	P25374	Cysteine desulfurase;involved in iron-sulfur cluster (Fe/S) biogenesis and in thio-modification of mitochondrial and cytoplasmic tRNAs;essential protein located predominantly in mitochondria	NFS1	54.4708		7932	6783	9314	Matrix/IM
YIL155C	P32191	Mitochondrial glycerol-3-phosphate dehydrogenase;expression is repressed by both glucose and cAMP and derepressed by non-fermentable carbon sources in a Snf1p, Rsf1p, Hap2/3/4/5 complex dependent manner	GUT2	72.3917		7842	33364	67458	IMS/IM
YPR004C	Q12480	Putative ortholog of mammalian ETF-alpha;interacts with frataxin, Yfh1p;null mutant displays elevated frequency of mitochondrial genome loss;may have a role in oxidative stress response;ETF-alpha is an electron transfer flavoprotein complex subunit	AIM45	36.808		7714	8281	8509
YOR215C	Q12032	Protein of unknown function;the authentic protein is detected in highly purified mitochondria in high-throughput studies;null mutant displays reduced frequency of mitochondrial genome loss	AIM41	21.2402		7702	13871	30708	Matrix/IM
YDR377W	Q06405	Subunit f of the F0 sector of mitochondrial F1F0 ATP synthase;F1F0 ATP synthase is a large, evolutionarily conserved enzyme complex required for ATP synthesis	ATP17	11.3223		7237	24746	29174
YLR351C	P49954	Nit protein;one of two proteins in S. cerevisiae with similarity to the Nit domain of NitFhit from fly and worm and to the mouse and human Nit protein which interacts with the Fhit tumor suppressor;nitrilase superfamily member	NIT3	32.5496		7069	6320	9440
YLR038C	Q01519	Subunit VIb of cytochrome c oxidase;cytochrome c oxidase is also known as respiratory Complex IV and is the terminal member of the mitochondrial inner membrane electron transport chain;required for assembly of cytochrome c oxidase but not required for activity after assembly;phosphorylated;easily released from the intermembrane space, suggesting a loose association with Complex IV	COX12	9.784		7028	27410	42099
YGL068W	P53163	Mitochondrial ribosomal protein of the large subunit;has similarity to E. coli L7/L12 and human MRPL7 ribosomal proteins;associates with the mitochondrial nucleoid;required for normal respiratory growth	MNP1	20.6542		6897	11342	10395	Matrix/IM
YCR083W	P25372	Mitochondrial thioredoxin;highly conserved oxidoreductase required to maintain the redox homeostasis of the cell, forms the mitochondrial thioredoxin system with Trr2p, redox state is maintained by both Trr2p and Glr1p	TRX3	14.4373		6823	9057	20587
YHR063C	P38787	2-dehydropantoate 2-reductase;part of the pantothenic acid pathway, structurally homologous to E. coli panE	PAN5	42.8188		6813	4045	2971
YIL070C	P40513	Specific translational activator for the mitochondrial COX1 mRNA;acidic protein of the mitochondrial matrix;related to the human complement receptor gC1q-R	MAM33	30.1115		6791	14810	15038	Matrix/IM
YDR493W	Q03429	Protein required for assembly of the cytochrome bc(1) complex;acts as a chaperone for Rip1p and facilitates its insertion into the complex at a late stage of assembly;localized to the mitochondrial matrix;null mutant exhibits a respiratory growth defect and reduced mitochondrial zinc levels, which is characteristic of mutations affecting bc(1) complex assembly;member of the LYR protein family;hum…	MZM1	13.9363		6738	7474	8910	Matrix/IM
YIL022W	Q01852	Essential component of the TIM23 complex;tethers the import motor and regulatory factors (PAM complex) to the translocation channel (Tim23p-Tim17p core complex);TIM23 complex is short for the translocase of the inner mitochondrial membrane	TIM44	48.8691		6697	6962	7298	Matrix/IM
YBL057C	P34222	One of two mitochondrially-localized peptidyl-tRNA hydrolases;negatively regulates the ubiquitin-proteasome pathway via interactions with ubiquitin-like ubiquitin-associated proteins;dispensable for cell growth;see also PTH1	PTH2	22.4296		6624	4813	4545	OM
YKL148C	Q00711	Flavoprotein subunit of succinate dehydrogenase;couples the oxidation of succinate to the transfer of electrons to ubiquinone as part of the TCA cycle and the mitochondrial respiratory chain;FAD binding to Sdh1p is required for the assembly of the succinate dehydrogenase subunits;mutations in human ortholog SDHA are associated with Leigh syndrome	SDH1	70.2293		6537	27833	33739
YOR251C	Q08686	Rhodanese domain sulfur transferase;accepts persulfite from Nfs1p and transfers it to Uba4p in the pathway for 2-thiolation of the wobble uridine base of tRNAs;also stimulates sulfur transfer by Nfs1p;may be mitochondrially localized	TUM1	34.2132		6424	6222	7954	Matrix/IM
YOR222W	Q99297	Mitochondrial inner membrane transporter;2-oxodicarboxylate transporter, exports 2-oxoadipate and 2-oxoglutarate from the mitochondrial matrix to the cytosol for use in lysine and glutamate biosynthesis and in lysine catabolism;ODC2 has a paralog, ODC1, that arose from the whole genome duplication	ODC2	34.0265		6288	4507	4474
YMR038C	P40202	Copper chaperone for superoxide dismutase Sod1p;involved in oxidative stress protection;Met-X-Cys-X2-Cys motif within N-terminus is involved in insertion of copper into Sod1p under conditions of copper deprivation;required for regulation of yeast copper genes in response to DNA-damaging agents;protein abundance increases in response to DNA replication stress;human homolog CCS can complement yeast…	CCS1	27.3282		6197	3696	4195	IMS/IM
YBR230C	P38325	Mitochondrial outer membrane receptor for cytosolic ribosomes;integral protein of the outer membrane that interacts with the nascent chain-associated complex (NAC) bound to ribosomes, contributing to co-translational mitochondrial import;interacts with porin (Por1p) and Om45p;abundance is decreased in cells grown in glucose relative to other carbon sources	OM14	14.6149		6093	13526	40266	OM
YBR244W	P38143	Phospholipid hydroperoxide glutathione peroxidase;protects cells from phospholipid hydroperoxides and nonphospholipid peroxides during oxidative stress;induced by glucose starvation;protein abundance increases in response to DNA replication stress	GPX2	18.4103		6068	1519	2307	OM
YAL044W-A	Q3E793	Mitochondrial matrix protein involved in Fe-S cluster biogenesis;facilitates [4Fe-2S] cluster inception into mitochondrial proteins such as lipoate synthase and succinate dehydrogenase;interacts and may function with Grx5p at an early step in Fe-S cluster biosynthesis;forms dimeric complexes with Grx5p and Nfu1p that alter the stability of shared Fe/S clusters;sequence similarity to human BOLA fa…	BOL1	12.5437		5930	4918	13959	Matrix/IM
YER026C	P08456	Phosphatidylserine synthase;functions in phospholipid biosynthesis;catalyzes the reaction CDP-diaclyglycerol + L-serine = CMP + L-1-phosphatidylserine, transcriptionally repressed by myo-inositol and choline	CHO1	30.7988		5869	4350	4341	OM
YBR084W	P09440	Mitochondrial C1-tetrahydrofolate synthase;involved in interconversion between different oxidation states of tetrahydrofolate (THF);provides activities of formyl-THF synthetase, methenyl-THF cyclohydrolase, and methylene-THF dehydrogenase	MIS1	106.229		5847	6227	5872
YKL134C	P35999	Mitochondrial intermediate peptidase;cleaves destabilizing N-terminal residues of a subset of proteins upon import, after their cleavage by mitochondrial processing peptidase (Mas1p-Mas2p);may contribute to mitochondrial iron homeostasis	Oct1	88.1849		5741	4419	6384
YOR045W	P33448	Component of the TOM (translocase of outer membrane) complex;responsible for recognition and initial import steps for all mitochondrially directed proteins;promotes assembly and stability of the TOM complex	TOM6	6.4076		5677	5861	4252	OM
YOR131C	Q12486	Putative haloacid dehalogenase-like hydrolase;non-essential gene;overexpression causes a cell cycle delay or arrest;protein abundance increases in response to DNA replication stress		24.8373		5641	5692	5376
YLR295C	Q12349	Subunit h of the F0 sector of mitochondrial F1F0 ATP synthase;F1F0 ATP synthase is a large, evolutionarily conserved enzyme complex required for ATP synthesis;protein abundance increases in response to DNA replication stress	ATP14	14.1179		5512	17879	17917	Matrix/IM
YHR201C	P38698	Exopolyphosphatase;hydrolyzes inorganic polyphosphate (poly P) into Pi residues;located in the cytosol, plasma membrane, and mitochondrial matrix	PPX1	45.0428		5395	2053	3574
YML054C	P00175	Cytochrome b2 (L-lactate cytochrome-c oxidoreductase);component of the mitochondrial intermembrane space, required for lactate utilization;expression is repressed by glucose and anaerobic conditions	CYB2	65.5461		5390	24800	48598	IMS/IM
YGR082W	P35180	Component of the TOM (translocase of outer membrane) complex;responsible for recognition and initial import steps for all mitochondrially directed proteins;acts as a receptor for incoming precursor proteins	TOM20	20.3154		5267	5797	4874	OM
YKL192C	P32463	Mitochondrial matrix acyl carrier protein;involved in biosynthesis of octanoate, which is a precursor to lipoic acid;activated by phosphopantetheinylation catalyzed by Ppt2p	ACP1	13.9378		5238	6074	6947
YBR056W	P38081	Putative glycoside hydrolase of the mitochondrial intermembrane space		57.8125		5142	4197	8267
YFR011C	P43594	Component of the MICOS complex;MICOS (formerly MINOS or MitOS) is a mitochondrial inner membrane complex that extends into the intermembrane space and has a role in the maintenance of crista junctions, inner membrane architecture, and formation of contact sites to the outer membrane;Mic19p is peripheral to the inner membrane and may connect Mic60p with the Mic10p-Mic12p-Mic27p subcomplex;both yea…	MIC19	18.8534		5094	10507	11255	IMS/IM
YER080W	P40053	Protein of unknown function;the authentic, non-tagged protein is detected in highly purified mitochondria in high-throughput studies;null mutant displays elevated frequency of mitochondrial genome loss	AIM9	72.4218		5084	4740	7609
YOR286W	Q08742	Protein with rhodanese activity;contains a rhodanese-like domain similar to Rdl1p, Uba4p, Tum1p, and Ych1p;overexpression causes a cell cycle delay;null mutant displays elevated frequency of mitochondrial genome loss	RDL2	16.7066		4974	7008	6638
YDL067C	P07255	Subunit VIIa of cytochrome c oxidase (Complex IV);Complex IV is the terminal member of the mitochondrial inner membrane electron transport chain	COX9	6.9673		4921	22581	25127
YJR144W	P32787	Protein with a role in mitochondrial DNA recombinational repair;also involved in interstrand cross-link repair;binds to and catalyzes the annealing of single-stranded mtDNA;oligomerizes to form rings and filaments;related to Rad52-type recombination proteins, with limited overall similarity but sharing conserved functionally important residues;component of the mitochondrial nucleoid, required for…	MGM101	30.105		4801	5130	6347	Matrix/IM
YHR037W	P07275	Delta-1-pyrroline-5-carboxylate dehydrogenase;nuclear-encoded mitochondrial protein involved in utilization of proline as sole nitrogen source;deficiency of human homolog ALDH4A1 causes type II hyperprolinemia (HPII), an autosomal recessive inborn error of metabolism;human homolog ALDH4A1 can complement yeast null mutant	PUT2	64.4337		4755	5436	7555
YMR189W	P49095	P subunit of the mitochondrial glycine decarboxylase complex;glycine decarboxylase is required for the catabolism of glycine to 5,10-methylene-THF;expression is regulated by levels of 5,10-methylene-THF in the cytoplasm	GCV2	114.448		4722	1093	2218
YML110C	P49017	2-hexaprenyl-6-methoxy-1,4-benzoquinone methyltransferase;involved in ubiquinone (Coenzyme Q) biosynthesis;localizes to the matrix face of the mitochondrial inner membrane in a large complex with other ubiquinone biosynthetic enzymes;respiratory defect of the null mutant is partially complemented by human COQ5	COQ5	34.6819		4674	5176	3981	Matrix/IM
Q0250	P00410	Subunit II of cytochrome c oxidase (Complex IV);Complex IV is the terminal member of the mitochondrial inner membrane electron transport chain;one of three mitochondrially-encoded subunits	COX2	28.5502		4551	19291	32993
YHR030C	Q00772	Serine/threonine MAP kinase;coordinates expression of all 19S regulatory particle assembly-chaperones (RACs) to control proteasome abundance;involved in regulating maintenance of cell wall integrity, cell cycle progression, nuclear mRNA retention in heat shock, septum assembly;required for mitophagy, pexophagy;affects recruitment of mitochondria to phagophore assembly site;plays role in adaptive …	SLT2	55.6174		4514	2940	4231
YGR049W	P32564	Mitochondrial outer membrane protein of unknown function;predicted to have 4 transmembrane segments;import is mediated by Tom70p and Mim1p;interacts genetically with a cdc4 mutation;SCM4 has a paralog, ATG33, that arose from the whole genome duplication	SCM4	20.1238		4460	4467	4796	OM
YPR002W	Q12428	Putative 2-methylcitrate dehydratase;mitochondrial protein that participates in respiration;induced by diauxic shift;homologous to E. coli PrpD, may take part in the conversion of 2-methylcitrate to 2-methylisocitrate	PDH1	57.6963		4454	11740	28647
YMR110C	Q04458	Dehydrogenase involved in ubiquinone and sphingolipid metabolism;oxidizes 4-hydroxybenzaldehyde into 4-hydroxybenzoic acid in ubiquinone biosynthesis;converts hexadecenal to hexadecenoic acid in sphingosine 1-phosphate breakdown pathway;located in the mitochondrial outer membrane and also in lipid particles;human homolog ALDH3A2, a fatty aldehyde dehydrogenase (FALDH) mutated in neurocutaneous di…	HFD1	59.9754		4423	5499	13695	OM
YPL098C	Q02889	Subunit of the TIM23 translocase complex;acts to couple Tim21p with the core Tim23 translocase;provides quality control for insertion of membrane proteins by regulating their release into the inner membrane by the TIM23 complex;absolutely required for mitochondrial import of presequence-containing proteins at elevated temperature;required for viability of cells lacking the mitochondrial genome (p…	MGR2	12.2574		4373	7044	8171
YCL057W	P25375	Zinc metalloendopeptidase;found in the cytoplasm and intermembrane space of mitochondria;with Cym1p, involved in degradation of mitochondrial proteins and of presequence peptides cleaved from imported proteins;protein abundance increases in response to DNA replication stress	PRD1	81.9162		4282	4425	4673
YJL060W	P47039	Kynurenine aminotransferase;catalyzes formation of kynurenic acid from kynurenine;potential Cdc28p substrate	BNA3	50.0797		4277	2308	2791
YPL040C	P48526	Mitochondrial isoleucyl-tRNA synthetase;null mutant is deficient in respiratory growth;human homolog IARS2 implicated in mitochondrial diseases, can partially complement yeast null mutant	ISM1	115.801		4240	4341	11880	Matrix/IM
YPL134C	Q03028	Mitochondrial inner membrane transporter;2-oxodicarboxylate transporter, exports 2-oxoadipate and 2-oxoglutarate from the mitochondrial matrix to the cytosol for lysine and glutamate biosynthesis and lysine catabolism;suppresses, in multicopy, an fmc1 null mutation;ODC1 has a paralog, ODC2, that arose from the whole genome duplication	ODC1	34.2257		4201	12231	18029	Matrix/IM
YKL195W	P36046	Import and assembly protein in mitochondrial intermembrane space;component of MIA pathway which mediates import and oxidative folding of substrates including small proteins containing twin cysteine motifs;acts in concert with Erv1p, which oxidizes the cysteine residues of Mia40p to comprise a disulfide relay system that catalyzes import;also mediates folding of Atp23p via a chaperone-like activit…	MIA40	44.4918		4147	6227	6431	IMS/IM
YPL063W	Q02776	Essential component of the TIM23 complex;acts as receptor for the translocase of the inner mitochondrial membrane (TIM23) complex guiding incoming precursors from the TOM complex;may control the gating of the Tim23p-Tim17p channel	TIM50	55.0982		4095	3750	4055	IMS/IM
YNL052W	P00424	Subunit Va of cytochrome c oxidase;cytochrome c oxidase is the terminal member of the mitochondrial inner membrane electron transport chain;Cox5Ap is predominantly expressed during aerobic growth while its isoform Vb (Cox5Bp) is expressed during anaerobic growth;COX5A has a paralog, COX5B, that arose from the whole genome duplication	COX5A	17.1478		4040	17446	28532
YLR008C	Q07914	Subunit of the import motor (PAM complex);the PAM complex is a component of the Translocase of the Inner Mitochondrial membrane (TIM23 complex);essential J-protein cochaperone that stimulates Ssc1p ATPase activity to drive import;inhibited by Pam16p	PAM18	17.9166		3983	3984	3878	IMS/IM
YHR024C	P11914	Alpha subunit of the mitochondrial processing protease (MPP);essential processing enzyme that cleaves the N-terminal targeting sequences from mitochondrially imported proteins	MAS2	53.3312		3953	4551	4333
YIL065C	P40515	Protein involved in mitochondrial fission and peroxisome abundance;may have a distinct role in tethering protein aggregates to mitochondria in order to retain them in the mother cell;required for localization of Dnm1p and Mdv1p during mitochondrial division;mediates ethanol-induced apoptosis and ethanol-induced mitochondrial fragmentation	FIS1	17.7387		3902	6049	7626
YDR120C	P15565	tRNA methyltransferase;two forms of protein are made by alternative translation starts;localizes to both nucleus and mitochondrion to produce modified base N2,N2-dimethylguanosine in tRNAs in both compartments;nuclear Trm1p is evenly distributed around inner nuclear membrane in WT, but mislocalizes as puncta near ER-nucleus junctions in spindle pole body (SPB) mutants;both Trm1p inner nuclear mem…	TRM1	64.0712		3724	2606	3879	Matrix/IM
YNR018W	P53721	Cytochrome c oxidase subunit;has a role in assembly of respiratory supercomplexes;similar to Rcf1p, and either Rcf1p or Rcf2p is required for late-stage assembly of the Cox12p and Cox13p subunits and for cytochrome c oxidase activity;associates with the cytochrome c oxidase - cytochrome bc1 supercomplex;null mutant accumulates reactive oxygen species;member of the conserved hypoxia induced gene f…	RCF2	25.3525		3704	8530	5325	IMS/IM
YJL104W	P42949	Subunit of the import motor (PAM complex);the PAM complex is a component of the Translocase of the Inner Mitochondrial membrane (TIM23 complex);forms a 1:1 subcomplex with Pam18p and inhibits its cochaperone activity;contains a J-like domain	PAM16	16.2223		3703	3831	3379	Matrix/IM
YDL178W	P46681	D-2-hydroxyglutarate dehydrogenase, and minor D-lactate dehydrogenase;mitochondrial matrix protein that oxidizes D-2-hydroxyglutarate (D-2HG), an oncometabolite, to alpha-ketoglutarate with a minor role in lactate catabolism;located in the mitochondrial matrix	DLD2	59.2599		3661	3802	3808
YKL027W	P36101	tRNA threonylcarbamoyladenosine dehydratase;required for the ct6A tRNA base modification, where an adenosine at position 37 is modified to form a cyclized active ester with an oxazolone ring;localized to the mitochondrial outer membrane;TCD2 has a paralog, TCD1, that arose from the whole genome duplication	TCD2	50.2733		3584	3687	4295	OM
YEL039C	P00045	Cytochrome c isoform 2, expressed under hypoxic conditions;also known as iso-2-cytochrome c;electron carrier of the mitochondrial intermembrane space that transfers electrons from ubiquinone-cytochrome c oxidoreductase to cytochrome c oxidase during cellular respiration;protein abundance increases in response to DNA replication stress;CYC7 has a paralog, CYC1, that arose from the whole genome dup…	CYC7	12.5416		3579	3955	3798
YIL160C	P27796	3-ketoacyl-CoA thiolase with broad chain length specificity;cleaves 3-ketoacyl-CoA into acyl-CoA and acetyl-CoA during beta-oxidation of fatty acids	POT1	44.7319		3573	5013	50283
YLR069C	P25039	Mitochondrial elongation factor involved in translational elongation	MEF1	84.5706		3522	4988	4919	Matrix/IM
YLR089C	P52893	Alanine transaminase (glutamic pyruvic transaminase);involved in alanine biosynthesis and catabolism;TOR1-independent role in determining chronological lifespan;expression is induced in the presence of alanine;repression is mediated by Nrg1p;ALT1 has a paralog, ALT2, that arose from the whole genome duplication;Alt2p is catalytically inactive	ALT1	66.4182		3472	4047	4142
YGR012W	P53206	Putative cysteine synthase;localized to the mitochondrial outer membrane	MCY1	42.8054		3471	2823	3297	OM
YDR070C	Q12497	Protein of unknown function;may be involved in responding to conditions of stress;the authentic, non-tagged protein is detected in highly purified mitochondria in high-throughput studies;protein abundance increases in response to DNA replication stress	FMP16	10.8505		3414	3448	66971	Matrix/IM
YPR058W	P32331	Secondary mitochondrial inner membrane glycine transporter;required with HEM25 for the transport of glycine into mitochondria for the initiation of heme biosynthesis;proposed role in oleate metabolism and glutamate biosynthesis;member of the mitochondrial carrier (MCF) family;localizes to the vacuole in response to H2O2;YMC1 has a paralog, YMC2, that arose from the whole genome duplication	YMC1	33.3862		3401	2298	3372	IMS/IM
YDR178W	P37298	Membrane anchor subunit of succinate dehydrogenase (SDH);involved in coupling the oxidation of succinate to the transfer of electrons to ubiquinone as part of the TCA cycle and the mitochondrial respiratory chain;has similarity to human SDH subunit D (SDHD), which is implicated in paraganglioma	SDH4	20.2528		3377	9195	12815	IMS/IM
YLR201C	Q05779	Protein required for ubiquinone biosynthesis and respiratory growth;localizes to matrix face of mitochondrial inner membrane in a large complex with ubiquinone biosynthetic enzymes;ubiquinone is also known as coenzyme Q;human homolog COQ9 can complement yeast coq9 null mutant	COQ9	29.9628		3265	2409	2015
YLL001W	P54861	Dynamin-related GTPase involved in mitochondrial organization;required for mitochondrial fission and inheritance;self assembles on the cytoplasmic face of mitochondrial tubules at sites where division will occur;participates in endocytosis and regulates peroxisome fission along with Vps1p;mutants in the human ortholog DNM1L, which mediates mitochondrial fission, peroxisomal division, autophagy, a…	DNM1	84.9567		3232	4725	5888
YFL016C	P35191	Co-chaperone that stimulates HSP70 protein Ssc1p ATPase activity;involved in protein folding/refolding in the mitochodrial matrix;required for proteolysis of misfolded proteins;member of the HSP40 (DnaJ) family of chaperones	MDJ1	55.5798		3220	4098	4528	Matrix/IM
YOR100C	Q12289	Mitochondrial inner membrane carnitine transporter;required for carnitine-dependent transport of acetyl-CoA from peroxisomes to mitochondria during fatty acid beta-oxidation;human homolog SLC25A20 complements yeast null mutant	CRC1	34.7717		3203	2914	9393	IMS/IM
YHR076W	P38797	Type 2C serine/threonine protein phosphatase (PP2C);alternatively spliced to create two mRNA isoforms;protein from spliced form localizes to the mitochondria while the one from the unspliced form is localized to the nuclear envelope;activates coenzyme Q6 biosynthesis by dephosphorylation of demethoxy-Q6 hydroxylase Coq7p	PTC7	37.7807		3189	2849	3978	Matrix/IM
YJL063C	P22353	Mitochondrial ribosomal protein of the large subunit	MRPL8	26.9588		3175	4387	4821	Matrix/IM
YLR017W	Q07938	Methylthioadenosine phosphorylase (MTAP);catalyzes the initial step in the methionine salvage pathway;affects polyamine biosynthesis through regulation of ornithine decarboxylase (Spe1p) activity;regulates ADH2 gene expression	MEU1	37.858		3152	2369	1852	Matrix/IM
YGR183C	P22289	Subunit 9 of ubiquinol cytochrome-c reductase (Complex III);Complex III is a component of the mitochondrial inner membrane electron transport chain;required for electron transfer at the ubiquinol oxidase site of the complex	QCR9	7.4754		3141	11008	12638
YOR356W	Q08822	Putative ortholog of human ETF-dH;found in a large supramolecular complex with other mitochondrial dehydrogenases;may have a role in oxidative stress response;ETF-dH is also known as electron transfer flavoprotein dehydrogenase	CIR2	69.6365		3120	4829	6218
YOL027C	Q08179	Mitochondrial protein;forms a complex with Mba1p to facilitate recruitment of mRNA-specific translational activators to ribosomes;roles in protein export and K+/H+ exchange;human ortholog Letm1 implicated in Wolf-Hirschhorn syndrome	MDM38	65.0069		3111	4095	5196	Matrix/IM
YLL009C	Q12287	Copper metallochaperone that transfers copper to Sco1p and Cox11p;eventual delivery to cytochrome c oxidase;contains twin cysteine-x9-cysteine motifs;interacts with the MICOS complex, and interaction is promoted by copper ions;human homolog COX17 partially complements yeast null mutant	COX17	8.0512		3082	7105	6381	IMS/IM
YMR158W	Q03799	Mitochondrial ribosomal protein of the small subunit	MRPS8	17.4819		3062	4821	4699
YKL204W	P36041	eIF4E-associated protein, competes with eIF4G for binding to eIF4E;accelerates mRNA degradation by promoting decapping, facilitated by interaction with eIF4E;essential for Puf5p mediated repression;associates with Puf5p and Dhh1p;inhibits cap-dependent translation;functions independently of eIF4E to maintain genetic stability;plays a role in cell growth, implicated in the TOR signaling cascade	EAP1	69.7792		3054	2778	3391	OM
YNL036W	P53615	Carbonic anhydrase;metalloenzyme that catalyzes CO2 hydration to bicarbonate, which is an important metabolic substrate, and protons;not expressed under conditions of high CO2, such as inside a growing colony, but transcription is induced in response to low CO2 levels, such as on the colony surface in ambient air;poorly transcribed under aerobic conditions and at an undetectable level under anaer…	NCE103	24.8575		3048	2201	4195
YDR347W	P10662	Mitochondrial ribosomal protein of the small subunit;MRP1 exhibits genetic interactions with PET122, encoding a COX3-specific translational activator, and with PET123, encoding a small subunit mitochondrial ribosomal protein	MRP1	36.7363		3023	3892	4161	Matrix/IM
YPL215W	P21560	Mitochondrial protein required for assembly of cytochrome bc1 complex;forms a complex with Cbp6p that binds to mt ribosomes near the polypeptide tunnel exit and promotes efficient translation of the COB mRNA;Cbp3p-Cbp6p complex also interacts with newly synthesized cytochrome b (Cobp) and Cbp4p to promote assembly of Cobp into the cytochrome bc1 complex;Cbp3p-Cbp6p complex is sequestered if assem…	CBP3	39.0962		2985	2599	2687	Matrix/IM
YLR118C	Q12354	Acyl-protein thioesterase responsible for depalmitoylation of Gpa1p;green fluorescent protein (GFP)-fusion protein localizes to both the cytoplasm and nucleus and is induced in response to the DNA-damaging agent MMS	TML25	24.6985		2937	1913	2635
YDR119W-A	Q2V2P9	Stabilizes or regulates formation of respiratory chain supercomplexes composed of Complex III (ubiquinol-cytochrome c reductase) and Complex IV (cytochrome c oxidase)	COX26	7.4589		2927	12312	23138
YDR236C	Q03778	Riboflavin kinase, produces riboflavin monophosphate (FMN);FMN is a necessary cofactor for many enzymes;predominantly localizes to the microsomal fraction and also found in the mitochondrial inner membrane;human RFK functionally complements the lethality of the null mutation	FMN1	24.5302		2903	1388	1963
YPR098C	Q06089	Protein of unknown function;localized to the mitochondrial outer membrane	TMH18	17.7412		2902	3615	5832	OM
YBR054W	P38079	Protein with a putative role in response to acid stress;null mutant is sensitive to acetic acid;transcription is regulated by Haa1p and induced in the presence of acetic acid;protein observed in plasma membrane foci in the presence of acetic acid;the authentic, non-tagged protein is detected in a phosphorylated state in highly purified mitochondria in high-throughput studies	YRO2	38.7309		2890	2328	1027	OM
YPR113W	P06197	Phosphatidylinositol synthase;required for biosynthesis of phosphatidylinositol, which is a precursor for polyphosphoinositides, sphingolipids, and glycolipid anchors for some of the plasma membrane proteins	PIS1	24.829		2867	999	735
YBR170C	P33755	Substrate-recruiting cofactor of the Cdc48p-Npl4p-Ufd1p segregase;assists Cdc48p in the dislocation of misfolded, polyubiquitinated ERAD substrates that are subsequently delivered to the proteasome for degradation;also involved in the regulated destruction of resident ER membrane proteins, such as HMG-CoA reductase (Hmg1/2p) and cytoplasmic proteins (Fbp1p);role in mobilizing membrane bound trans…	NPL4	65.7638		2841	1584	2258
YPL206C	Q08959	Phosphatidylglycerol phospholipase C;regulates phosphatidylglycerol (PG) accumulation via a phospholipase C-type degradation mechanism;PG levels affect mitochondrial function;contains glycerophosphodiester phosphodiesterase motifs	PGC1	37.0761		2820	2072	2312	OM
YLR163C	P10507	Beta subunit of the mitochondrial processing protease (MPP);essential processing enzyme that cleaves the N-terminal targeting sequences from mitochondrially imported proteins	MAS1	51.0823		2812	2904	2854
YBR120C	P07253	Mitochondrial protein required for translation of the COB mRNA;forms a complex with Cbp3p that binds to mt ribosomes near the polypeptide tunnel exit and promotes efficient translation of the COB mRNA;Cbp3p-Cbp6p complex also interacts with newly synthesized cytochrome b (Cobp) and Cbp4p to promote assembly of Cobp into the cytochrome bc1 complex;Cbp3p-Cbp6p complex is sequestered if assembly of …	CBP6	18.692		2791	4131	4943	Matrix/IM
YBL022C	P36775	ATP-dependent Lon protease;involved in degradation of misfolded proteins in mitochondria;required for biogenesis and maintenance of mitochondria	PIM1	127.085		2784	3024	3063	Matrix/IM
YGR084C	P12686	Mitochondrial ribosomal protein of the small subunit	MRP13	38.9995		2778	2804	4211	Matrix/IM
YBR091C	P32830	Essential protein of the inner mitochondrial membrane;peripherally localized;component of the TIM22 complex, which is a twin-pore translocase that mediates insertion of numerous multispanning inner membrane proteins	TIM12	12.2831		2719	1780	2876	IMS/IM
YOL033W	P48525	Mitochondrial glutamyl-tRNA synthetase;predicted to be palmitoylated	MSE1	61.6211		2705	1829	2018	Matrix/IM
YGR174C	P37267	Mitochondrial protein required for assembly of cytochrome bc1 complex;interacts with the Cbp3p-Cbp6p complex and newly synthesized cytochrome b (Cobp) to promote assembly of Cobp into the cytochrome bc1 complex	CBP4	20.2254		2692	5616	7305	IMS/IM
YML042W	P32796	Carnitine acetyl-CoA transferase;present in both mitochondria and peroxisomes;transfers activated acetyl groups to carnitine to form acetylcarnitine which can be shuttled across membranes	CAT2	77.2466		2669	4095	22420
YKL141W	P33421	Subunit of succinate dehydrogenase and of TIM22 translocase;functions as cytochrome b subunit of succinate dehydrogenase, which couples oxidation of succinate to transfer of electrons to ubiquinone as part of the TCA cycle and the mitochondrial respiratory chain;also required for mitochondrial inner membrane protein import as part of the TIM22 complex;SDH3 has a paralog, SHH3, that arose from the…	SDH3	22.0833		2665	14452	18383
YJR051W	P21375	Fumarate reductase, catalyzes the reduction of fumarate to succinate;required for the reoxidation of intracellular NADH under anaerobic conditions;mutations cause osmotic sensitivity;has two translation start sites, one at the annotated start codon which produces an ER-targeted form required for anaerobic growth, and one at codon 32 which produces a mitochondrially-targeted form;OSM1 has a paralo…	OSM1	55.0738		2637	2193	2392
YDR511W	Q04401	Mitochondrial protein involved in assembly of succinate dehydrogenase;has a role in maturation of the Sdh2p subunit;localized to the mitochondrial intermembrane space;required for acetate utilization and gluconeogenesis;mutation in Drosophila ortholog SDHAF3 causes reduced succinate dehydrogenase activity and neuronal and muscular dysfunction;member of the LYR protein family	SDH7	15.7863		2620	5291	5529	Matrix/IM
YNL168C	P53889	Putative protein of unknown function;GFP-fusion protein is induced in response to the DNA-damaging agent MMS;the authentic, non-tagged protein is detected in highly purified mitochondria in high-throughput studies	FMP41	28.7964		2618	2531	2864	Matrix/IM
YHR198C	P38884	Protein of unknown function;the authentic, non-tagged protein is detected in highly purified mitochondria in high-throughput studies;null mutant displays elevated frequency of mitochondrial genome loss	AIM18	36.5101		2612	1791	2502	IMS/IM
YJL145W	P47008	Non-classical phosphatidylinositol transfer protein (PITP);exhibits PI- but not PC-transfer activity;localizes to the peripheral endoplasmic reticulum, cytosol and microsomes;similar to Sec14p;partially relocalizes to the plasma membrane upon DNA replication stress	SFH5	34.3906		2547	1872	2441	OM
YLR312W-A	P36523	Mitochondrial ribosomal protein of the large subunit	MRPL15	28.1779		2520	3405	3532	Matrix/IM
YER053C	P40035	Mitochondrial copper and phosphate carrier;imports copper and inorganic phosphate into mitochondria;functionally redundant with Mir1p but less abundant than Mir1p under normal conditions;expression is induced at high temperature	PIC2	33.5458		2484	3035	4300	Matrix/IM
YPR010C-A	A5Z2X5	Putative protein of unknown function;SWAT-GFP, seamless-GFP and mCherry fusion proteins localize to the cytosol;conserved among Saccharomyces sensu stricto species	MIN8	7.9043		2464	11680	13017	IMS/IM
YGR255C	P53318	Flavin-dependent monooxygenase involved in ubiquinone biosynthesis;responsible for hydroxylation at position C5 and deamination at C4 during ubiquinone (Coenzyme Q) biosynthesis;localizes to matrix face of mitochondrial inner membrane in a large complex with other ubiquinone biosynthetic enzymes;human homolog COQ6 can complement yeast null mutant and is implicated in steroid-resistant nephrotic s…	COQ6	53.526		2443	1212	1784
YGR236C	P50088	Protein required for high temperature survival during stationary phase;not required for growth on nonfermentable carbon sources;the authentic, non-tagged protein is detected in highly purified mitochondria in high-throughput studies	SPG1	10.5464		2436	3795	11321	IMS/IM
YML009C	P36533	Mitochondrial ribosomal protein of the large subunit	MRPL39	7.9878		2430	3715	4972	Matrix/IM
YKL170W	P35996	Mitochondrial ribosomal protein of the large subunit;appears as two protein spots (YmL34 and YmL38) on two-dimensional SDS gels;protein abundance increases in response to DNA replication stress	MRPL38	14.919		2416	4735	5465	Matrix/IM
YCL057C-A	Q96VH5	Conserved component of the MICOS complex;MICOS (formerly MINOS or MitOS) is a mitochondrial inner membrane complex that extends into the intermembrane space and has a role in the maintenance of crista junctions, inner membrane architecture, and formation of contact sites to the outer membrane;forms a subcomplex with Mic12p and Mic27p whose assembly and stability requires cardiolipin;homo-oligomer…	MIC10	10.4141		2415	5845	5377	IMS/IM
YMR024W	P36516	Mitochondrial ribosomal protein of the large subunit;located in close proximity to the polypeptide exit channel of the ribosome;mutations in human homolog MRPL44 cause childhood cardiomyopathy;human MRPL44 deficiency results in inefficient assembly of the mitochondrial ribosome, and in tissue-specific respiratory chain deficiency, manifesting as either Complex I+Complex IV or Complex IV deficienc…	MRPL3	44.0154		2411	2809	2968
YGL191W	P32799	Subunit VIa of cytochrome c oxidase;present in a subclass of cytochrome c oxidase complexes that may have a role in mimimizing generation of reactive oxygen species;not essential for cytochrome c oxidase activity but may modulate activity in response to ATP;required for assembly of Rcf2p into cytochrome c oxidase - cytochrome bc1 supercomplexes	COX13	15.0223		2406	10674	17934
YPR006C	Q12031	2-methylisocitrate lyase of the mitochondrial matrix;functions in the methylcitrate cycle to catalyze the conversion of 2-methylisocitrate to succinate and pyruvate;ICL2 transcription is repressed by glucose and induced by ethanol	ICL2	64.9766		2375	3965	23801
YCR005C	P08679	Citrate synthase, peroxisomal isozyme involved in glyoxylate cycle;catalyzes condensation of acetyl coenzyme A and oxaloacetate to form citrate;expression is controlled by Rtg1p and Rtg2p transcription factors;SCF-Ucc1 regulates level of Cit2p to maintain citrate homeostasis;oxaloacetate-dependent positive feedback loop inhibits Cit2p ubiquitination;CIT2 has a paralog, CIT1, that arose from the w…	CIT2	51.4057		2374	1858	2489
YDR194C	P15424	Mitochondrial transcription elongation factor;DEAD-box protein;required for efficient splicing of mitochondrial Group I and II introns;non-polar RNA helicase that also facilities strand annealing;promotes RNA folding by stabilizing an early assembly intermediate	MSS116	76.2826		2366	2654	2725	Matrix/IM
YIL156W-B	Q2V2P4	Putative protein of unknown function;originally identified based on homology to <i>Ashbya gossypii</i> and other related yeasts;SWAT-GFP and mCherry fusion proteins localize to the vacuole, while SWAT-GFP fusion also localizes to the endoplasmic reticulum	MCO8	8.1687		2340	3289	4789
YPL188W	Q06892	Mitochondrial NADH kinase;phosphorylates NADH;also phosphorylates NAD(+) with lower specificity;required for the response to oxidative stress	POS5	46.2544		2326	1823	4152	Matrix/IM
YEL040W	P32623	Chitin transglycosylase;functions in the transfer of chitin to beta(1-6) and beta(1-3) glucans in the cell wall;similar to and functionally redundant with Crh1;glycosylphosphatidylinositol (GPI)-anchored protein localized to bud neck	UTR2	49.8868		2316	921	390
YDR031W	Q04341	Mitochondrial intermembrane space protein of unknown function;required for normal oxygen consumption;contains twin cysteine-x9-cysteine motifs;protein abundance increases in response to DNA replication stress	MIX14	13.8643		2315	3543	3681	IMS/IM
YGR235C	P50087	Component of the MICOS complex;MICOS (formerly MINOS or MitOS) is a mitochondrial inner membrane complex that extends into the intermembrane space and has a role in the maintenance of crista junctions, inner membrane architecture, and formation of contact sites to the outer membrane;Mic26p is a non-essential component of the complex	MIC26	26.9192		2310	4288	4311	IMS/IM
YKL003C	P28778	Mitochondrial ribosomal protein of the small subunit;MRP17 exhibits genetic interactions with PET122, encoding a COX3-specific translational activator	MRP17	15.0289		2310	2597	2627	Matrix/IM
YNL130C	P17898	Cholinephosphotransferase;required for phosphatidylcholine biosynthesis and for inositol-dependent regulation of EPT1 transcription;CPT1 has a paralog, EPT1, that arose from the whole genome duplication	CPT1	44.8247		2278	1173	1436
YJL158C	P47001	Mannose-containing glycoprotein constituent of the cell wall;member of the PIR (proteins with internal repeats) family	CIS3	23.2338		2276	1167	1897
YLR203C	P32335	Specific translational activator for the mitochondrial COX1 mRNA;loosely associated with the matrix face of the mitochondrial inner membrane;localizes to vacuole membrane in response to H2O2;influences both COX1 mRNA translation and Cox1p assembly into cytochrome c oxidase;binds to heme B, which may be a mechanism for sensing oxygen levels in order to regulate cytochrome c oxidase biogenesis	MSS51	50.8867		2275	3030	3333
YNL185C	P53875	Mitochondrial ribosomal protein of the large subunit	MRPL19	16.681		2270	3818	3591	Matrix/IM
YMR286W	P20084	Mitochondrial ribosomal protein of the large subunit	MRPL33	9.5404		2267	3987	3702
YHR117W	P38825	Mitochondrial outer membrane protein;probable minor component of the TOM (translocase of outer membrane) complex responsible for recognition and import of mitochondrially directed proteins;TOM71 has a paralog, TOM70, that arose from the whole genome duplication	TOM71	71.8499		2250	1586	1953	OM
YKR070W	P36151	Putative protein of unknown function;the authentic, non-tagged protein is detected in highly purified mitochondria in high-throughput studies		39.4104		2249	2308	3576	Matrix/IM
YMR267W	P28239	Mitochondrial inorganic pyrophosphatase;required for mitochondrial function and possibly involved in energy generation from inorganic pyrophosphate;human ortholog, PPA2, functionally complements the null mutant;mutations in human PPA2 cause a mitochondrial disease resulting in sudden unexpected cardiac arrest in infants	PPA2	35.5729		2249	1305	1620
YER141W	P40086	Protein required for the hydroxylation of heme O to form heme A;heme A is an essential prosthetic group for cytochrome c oxidase	COX15	54.6902		2241	2674	3080	IMS/IM
YDL219W	Q07648	D-Tyr-tRNA(Tyr) deacylase;functions in protein translation, may affect nonsense suppression via alteration of the protein synthesis machinery;ubiquitous among eukaryotes	DTD1	16.7457		2229	1415	2932
YNL169C	P39006	Phosphatidylserine decarboxylase of the mitochondrial inner membrane;converts phosphatidylserine to phosphatidylethanolamine;regulates mitochondrial fusion and morphology by affecting lipid mixing in the mitochondrial membrane and by influencing the ratio of long to short forms of Mgm1p;partly exposed to the mitochondrial intermembrane space;autocatalytically processed	PSD1	56.6055		2223	2185	2106	IMS/IM
YPL173W	P36534	Mitochondrial ribosomal protein of the large subunit	MRPL40	33.7624		2211	3557	3541	Matrix/IM
YCL033C	P25566	Methionine-R-sulfoxide reductase;involved in the response to oxidative stress;protects iron-sulfur clusters from oxidative inactivation along with MXR1;involved in the regulation of lifespan	MXR2	19.2874		2161	2402	3955	Matrix/IM
YPR024W	P32795	Catalytic subunit of i-AAA protease complex;complex is located in mitochondrial inner membrane;responsible for degradation of unfolded or misfolded mitochondrial gene products;serves as nonconventional translocation motor to pull PNPase into intermembrane space;also has role in intermembrane space protein folding;mutation causes elevated rate of mitochondrial turnover;human homolog YME1L1 can com…	YME1	81.7709		2136	2141	2454	IMS/IM
YJR095W	P33303	Mitochondrial succinate-fumarate transporter;transports succinate into and fumarate out of the mitochondrion;required for ethanol and acetate utilization	SFC1	35.3598		2135	8545	40832	Matrix/IM
YKL113C	P26793	5' to 3' exonuclease, 5' flap endonuclease;required for Okazaki fragment processing and maturation, for long-patch base-excision repair and large loop repair (LLR), ribonucleotide excision repair;member of the S. pombe RAD2/FEN1 family;relocalizes to the cytosol in response to hypoxia	RAD27	43.2898		2134	1676	1739	Matrix/IM
YGL129C	Q01163	Mitochondrial ribosomal protein of the small subunit;has similarity to mammalian apoptosis mediator proteins;null mutation prevents induction of apoptosis by overproduction of metacaspase Mca1p	RSM23	50.8935		2127	2263	2800
YNL005C	P12687	Mitochondrial ribosomal protein of the large subunit	MRP7	43.2533		2122	3450	3866	Matrix/IM
YOR211C	P32266	Mitochondrial GTPase, present in complex with Ugo1p and Fzo1p;required for mitochondrial morphology, fusion, and genome maintenance;promotes membrane bending;exists as long and short form with different distributions;ratio of long to short forms is regulated by Psd1p;homolog of human OPA1 involved in autosomal dominant optic atrophy	MGM1	99.1788		2113	1794	2070	IMS/IM
YBR291C	P38152	Mitochondrial inner membrane citrate transporter;member of the mitochondrial carrier family	CTP1	32.1877		2111	273	372	Matrix/IM
YOR108W	Q12166	Alpha-isopropylmalate synthase II (2-isopropylmalate synthase);catalyzes the first step in the leucine biosynthesis pathway;the minor isozyme, responsible for the residual alpha-IPMS activity detected in a leu4 null mutant;LEU9 has a paralog, LEU4, that arose from the whole genome duplication	LEU9	67.1959		2096	1013	1097	Matrix/IM
YDR430C	P32898	Lysine-specific metalloprotease of the pitrilysin family;metalloprotease of the intermembrane space;degrades proteins and presequence peptides cleaved from imported proteins;required for normal mitochondrial morphology	CYM1	112.165		2085	2425	3053
YBR269C	P38345	Protein required for assembly of succinate dehydrogenase;interacts with flavinylated Sdh1p and may function as a chaperone for free Sdh1p, protecting its FAD cofactor from redox reactions before assembly of the complex;soluble protein of the mitochondrial matrix;respiratory defect of null mutant is functionally complemented by Drosophila and human orthologs	SDH8	15.5056		2082	4951	6594	Matrix/IM
YDL202W	P36521	Mitochondrial ribosomal protein of the large subunit;localizes to vacuole in response to H2O2	MRPL11	28.5284		2082	3242	3100	Matrix/IM
YOR150W	Q12487	Mitochondrial ribosomal protein of the large subunit;localizes to vacuole in response to H2O2	MRPL23	18.4798		2051	2893	3062	Matrix/IM
YJL062W-A	Q3E7B2	Mitochondrial protein required for cytochrome c oxidase assembly;also involved in translational regulation of Cox1p and prevention of Cox1p aggregation before assembly;located in the mitochondrial inner membrane	COA3	9.8857		2049	3821	3705	IMS/IM
YIL157C	P40452	Mitochondrial inner membrane protein;required for assembly of the cytochrome c oxidase complex (complex IV);interacts with complex IV assembly factor Shy1p during the early stages of assembly	COA1	22.0507		2033	2577	2916
YDR322W	Q06678	Mitochondrial ribosomal protein of the large subunit	MRPL35	42.8386		2020	2480	2781	Matrix/IM
YJL066C	P40364	Mitochondrial intermembrane space protein of unknown function	MPM1	28.4652		1999	3216	4895	IMS/IM
YDR462W	P36527	Mitochondrial ribosomal protein of the large subunit;protein abundance increases in response to DNA replication stress	MRPL28	17.3586		1996	2888	3156	Matrix/IM
YOL071W	Q08230	Protein required for flavinylation of Sdh1p;binds to Sdh1p and promotes FAD cofactor attachment, which is necessary for succinate dehydrogenase (SDH) complex assembly and activity;mutations in human ortholog PGL2 are associated with neuroendocrine tumors (paraganglioma)	SDH5	19.045		1965	2522	3156
YLR389C	Q06010	Metalloprotease;involved in N-terminal processing of pro-a-factor to mature form;expressed in both haploids and diploids;one of two yeast homologs of human insulin-degrading enzyme (hIDE);homolog Axl1p is also involved in processing of pro-a-factor	STE23	117.569		1961	1350	2087
YMR302C	P32843	Integral inner mitochondrial membrane protein;role in maintaining mitochondrial nucleoid structure and number;mutants exhibit an increased rate of mitochondrial DNA escape;shows some sequence similarity to exonucleases	YME2	96.7007		1952	1751	2392	IMS/IM
YKR006C	Q02204	Mitochondrial ribosomal protein of the large subunit;not essential for mitochondrial translation	MRPL13	30.2777		1948	3332	2793	Matrix/IM
YLR369W	Q05931	Mitochondrial hsp70-type molecular chaperone;required for assembly of iron/sulfur clusters into proteins at a step after cluster synthesis, and for maturation of Yfh1p, which is a homolog of human frataxin implicated in Friedreich's ataxia	SSQ1	72.3623		1944	1106	1694
YKL114C	P22936	Major apurinic/apyrimidinic endonuclease;3'-repair diesterase;involved in repair of DNA damage by oxidation and alkylating agents;also functions as a 3'-5' exonuclease to repair 7,8-dihydro-8-oxodeoxyguanosine;genetically interacts with NTG1 to maintain mitochondrial genome integrity	APN1	41.4425		1940	1525	1920	Matrix/IM
YJR074W	P47123	Conserved nuclear protein that interacts with GTP-Gsp1p;stimulates nucleotide release from Gsp1p;involved in nuclear protein import;nucleotide release is inhibited by Yrb1p	MOG1	24.2905		1919	1284	1937
YJL178C	P46989	Type I membrane protein involved in autophagy and the Cvt pathway;may be involved in membrane delivery to the phagophore assembly site	ATG27	30.1976		1915	1279	1882
YJR080C	P47127	Protein with a role in determining mitochondrial architecture;inner membrane protein that interacts physically and genetically with the MICOS complex and is required for its integrity	AIM24	44.4474		1906	2947	3159	Matrix/IM
YKL053C-A	O60200	Mitochondrial intermembrane space protein;forms complex with Ups2p that transfers phosphatidylserine from outer membrane to inner membrane for phosphatidylethanolamine synthesis;mutation affects mitochondrial distribution and morphology;contains twin cysteine-x9-cysteine motifs;protein abundance increases in response to DNA replication stress	MDM35	9.7101		1883	2094	2163	IMS/IM
YKR049C	P36141	Putative redox protein containing a thioredoxin fold;the authentic, non-tagged protein is detected in highly purified mitochondria in high-throughput studies	FMP46	15.6563		1874	3436	10439
YDR256C	P15202	Catalase A;breaks down hydrogen peroxide in the peroxisomal matrix formed by acyl-CoA oxidase (Pox1p) during fatty acid beta-oxidation	CTA1	58.5551		1865	5873	51835
YKR085C	P22354	Mitochondrial ribosomal protein of the large subunit	MRPL20	22.4133		1849	2836	2776
YBR262C	P38341	Component of the MICOS complex;MICOS (formerly MINOS or MitOS) is a mitochondrial inner membrane complex that extends into the intermembrane space and has a role in the maintenance of crista junctions, inner membrane architecture, and formation of contact sites to the outer membrane;forms a subcomplex with Mic10p and Mic27p whose assembly and stability requires cardiolipin	MIC12	12.389		1843	3979	3575	IMS/IM
YML025C	P51998	Mitochondrial ribosomal protein of the large subunit;has similarity to E. coli L4 ribosomal protein and human mitoribosomal MRP-L4 protein;essential for viability, unlike most other mitoribosomal proteins	YML6	31.979		1839	3132	2909	Matrix/IM
YMR002W	Q03667	Mitochondrial intermembrane space protein;required for normal oxygen consumption;contains twin cysteine-x9-cysteine motifs;protein abundance increases in response to DNA replication stress	MIX17	16.6727		1829	2314	1287	OM
YCR071C	P25642	Mitochondrial ribosomal protein of the large subunit;conserved in metazoa, with similarity to human mitochondrial ribosomal protein MRPL49	IMG2	16.3945		1827	3157	2682
YGR029W	P27882	Flavin-linked sulfhydryl oxidase of the mitochondrial IMS;N-terminus is an intrinsically disordered domain that in the cytosol helps target Erv1p to mitochondria, and in the intermembrane space oxidizes Mia40p as part of a disulfide relay system that promotes intermembrane space retention of imported proteins;functional ortholog of human GFER (ALR);human GFER carrying N-terminal 21 amino acids of…	ERV1	21.6428		1801	1915	2411	IMS/IM
YJR113C	P47150	Mitochondrial ribosomal protein of the small subunit;has similarity to E. coli S7 ribosomal protein	RSM7	27.8286		1796	2783	2796	Matrix/IM
YBL055C	P34220	3'-->5' exonuclease and endonuclease with a possible role in apoptosis;has similarity to mammalian and C. elegans apoptotic nucleases		47.3864		1787	1332	1536	Matrix/IM
YNL292W	P48567	Pseudouridine synthase;catalyzes only the formation of pseudouridine-55 (Psi55), a highly conserved tRNA modification, in mitochondrial and cytoplasmic tRNAs;also responsible for pseudouracil modification of some mRNAs;PUS4 overexpression leads to translational derepression of GCN4 (Gcd- phenotype)	PUS4	45.2698		1771	1501	1474
YJR111C	P47148	Peroxisomal matrix protein with naturally active promoter;well-conserved in fungi;localized to peroxisomes under physiological growth conditions;levels of some amino acids are altered upon both knockout and overexpression, suggesting potential involvement of Pxp2p in amino acid metabolism or related cellular metabolic processes (needs further study);GFP-fusion protein displays inherent dual local…	PXP2	32.2126		1763	1137	1786
YNR074C	P52923	Mitochondrial cell death effector;translocates to the nucleus in response to apoptotic stimuli, homolog of mammalian Apoptosis-Inducing Factor, putative reductase	AIF1	41.3355		1762	701	841
YDR379C-A	Q3E785	Mitochondrial protein involved in assembly of succinate dehydrogenase;has a role in maturation of the Sdh2p subunit;member of the LYR protein family;mutations in human ortholog SDHAF1 are associated with infantile leukoencephalopathy	SDH6	9.359		1752	2743	2939
YKR071C	P36152	Component of the cytosolic Fe-S protein assembly (CIA) machinery;contains an Fe-S cluster that receives electrons from NADPH via the action of Tah18p in an early step in the CIA pathway;ortholog of human Ciapin1;protein abundance increases in response to DNA replication stress;inviability of the null mutant is functionally complemented by human CIAPIN1	DRE2	38.5339		1748	679	818
YKL065W-A	Q2V2P2	Putative protein of unknown function;SWAT-GFP fusion protein localizes to the endoplasmic reticulum (ER) while mCherry fusion localizes to both the ER and vacuole	DPC7	8.5413		1704	1198	7824	Matrix/IM
YMR244C-A	Q3E846	Protein involved in cytochrome c oxidase (Complex IV) assembly;involved in delivery of copper to Complex IV;also required for efficient formation of respiratory supercomplexes comprised of Complexes III and IV;localizes to the mitochondrial intermembrane space;ortholog implicated in cardiac defects in zebrafish and human;transcription is induced in response to the DNA-damaging agent MMS;protein a…	COA6	12.4503		1693	2478	2581	IMS/IM
YDR393W	Q04172	Protein required for normal mitochondrial morphology;mitochondrial inner membrane protein;may be involved in fission of the inner membrane;forms a homo-oligomeric complex	SHE9	53.5784		1675	738	842
YIL093C	P40496	Mitochondrial ribosomal protein of the small subunit	RSM25	30.5087		1658	2335	2303	Matrix/IM
YGR178C	P53297	Component of glucose deprivation induced stress granules;involved in P-body-dependent granule assembly;similar to human ataxin-2;interacts with Pab1p to regulate mRNA polyadenylation;interacts with Mkt1p to regulate HO translation;protein increases in abundance and relative distribution to the nucleus increases upon DNA replication stress	PBP1	78.7764		1650	1542	1140	OM
YPR125W	Q06493	Mitochondrial inner membrane protein;exposed to the mitochondrial matrix;associates with mitochondrial ribosomes;NOT required for respiratory growth;homolog of human Letm1, a protein implicated in Wolf-Hirschhorn syndrome	YLH47	52.1891		1638	1752	1873	Matrix/IM
YDR116C	Q04599	Mitochondrial ribosomal protein of the large subunit	MRPL1	31.0165		1616	2097	2325	Matrix/IM
YJL082W	P47031	Protein required for clearance of inclusion bodies;localizes to the inclusion bodies formed under protein misfolding stress;the authentic, non-tagged protein is detected in highly purified mitochondria in high-throughput studies;protein abundance increases in response to DNA replication stress;IML2 has a paralog, YKR018C, that arose from the whole genome duplication	IML2	82.5315		1609	993	1867	OM
YJL208C	P08466	Major mitochondrial nuclease;has RNAse and DNA endo- and exonucleolytic activities;roles in mitochondrial recombination, apoptosis and maintenance of polyploidy;involved in fragmentation of genomic DNA during PND (programmed nuclear destruction);encodes ortholog of mammalian endoG	NUC1	37.2169		1601	1727	1506	IMS/IM
YMR188C	Q03246	Mitochondrial ribosomal protein of the small subunit	MRPS17	27.6453		1594	2601	2942	Matrix/IM
YLR105C	P16658	Subunit of the tRNA splicing endonuclease;tRNA splicing endonuclease (Sen complex) is composed of Sen2p, Sen15p, Sen34p, and Sen54p;Sen complex also cleaves the CBP1 mRNA at the mitochondrial surface;Sen2p contains the active site for tRNA 5' splice site cleavage and has similarity to Sen34p and to Archaeal tRNA splicing endonuclease;	SEN2	44.1138		1586	889	868	OM
YPR001W	P43635	Dual specificity mitochondrial citrate and methylcitrate synthase;catalyzes the condensation of acetyl-CoA and oxaloacetate to form citrate and that of propionyl-CoA and oxaloacetate to form 2-methylcitrate	CIT3	53.8179		1568	2181	18102
YAL039C	P06182	Cytochrome c heme lyase (holocytochrome c synthase);attaches heme to apo-cytochrome c (Cyc1p or Cyc7p) in mitochondrial intermembrane space;human homolog HCCS implicated in microphthalmia with linear skin defects (MLS), and can complement yeast null mutant	CYC3	30.0712		1550	3144	2386	IMS/IM
YLR022C	Q07953	Guanine nucleotide exchange factor (GEF) for Ria1p;essential protein involved in ribosome maturation;with Ria1p, promotes release of Tif6p from 60S ribosomal subunits in the cytoplasm so that they can assemble with 40S subunits to generate mature ribosomes;ortholog of the human protein (SBDS) responsible for autosomal recessive Shwachman-Bodian-Diamond Syndrome;highly conserved across archaea and…	SDO1	28.2937		1536	671	697
YER154W	P39952	Mitochondrial inner membrane insertase;mediates the insertion of both mitochondrial- and nuclear-encoded proteins from the matrix into the inner membrane;also has a role in insertion of carrier proteins into the inner membrane;acts as a voltage-gated ion channel, activated by substrate peptides;interacts with mitochondrial ribosomes;conserved from bacteria to animals	OXA1	44.8364		1497	1941	1994	IMS/IM
YLL013C	Q07807	Protein of the mitochondrial outer surface;links the Arp2/3 complex with the mitochore during anterograde mitochondrial movement;also binds to and promotes degradation of mRNAs for select nuclear-encoded mitochondrial proteins	PUF3	98.0649		1495	2560	1611
YGL111W	P53136	Constituent of 66S pre-ribosomal particles;involved in 60S ribosomal subunit biogenesis	NSA1	51.908		1485	1099	1004
YCL026C-B	Q96VH4	Protein of unknown function;similar to bacterial nitroreductases;green fluorescent protein (GFP)-fusion protein localizes to the cytoplasm and nucleus;protein becomes insoluble upon intracellular iron depletion;protein abundance increases in response to DNA replication stress	HBN1	20.993		1469	2745	4571
YNL137C	P27929	Mitochondrial ribosomal component of the small subunit	NAM9	56.3837		1467	2251	2563	Matrix/IM
YER182W	P40098	Putative protein of unknown function;the authentic, non-tagged protein is detected in highly purified mitochondria in high-throughput studies	FMP10	27.7103		1457	2366	3035	IMS/IM
YBR227C	P38323	Non-proteolytic ATPase of the AAA family;stimulates incorporation of the pyridoxal phosphate cofactor into Hem1p (5-aminolevulinic acid synthase);localized to the mitochondrial matrix;ortholog of vertebrate CLPX, which promotes erythropoiesis	MCX1	57.9472		1450	973	1419	Matrix/IM
YGR076C	P23369	Mitochondrial ribosomal protein of the large subunit;mutation confers increased replicative lifespan	MRPL25	18.6082		1443	2754	3445	Matrix/IM
YLR059C	P54964	3'-5' RNA exonuclease;involved in 3'-end processing of U4 and U5 snRNAs, 5S and 5.8S rRNAs, and RNase P and RNase MRP RNA;localized to mitochondria and null suppresses escape of mtDNA to nucleus in yme1 yme2 mutants;RNase D exonuclease	REX2	30.8687		1437	1904	1766	Matrix/IM
YGR215W	P53305	Mitochondrial ribosomal protein of the small subunit	RSM27	12.4089		1426	1406	2072	Matrix/IM
YDL045W-A	O75012	Mitochondrial ribosomal protein of the small subunit;contains twin cysteine-x9-cysteine motifs;oxidized by Mia40p during import into mitochondria	MRP10	10.7018		1416	2044	1949	Matrix/IM
YDR381C-A	Q3E6R5	Protein of unknown function;localized to the mitochondrial outer membrane	MCO13	12.7227		1411	2766	2555	IMS/IM
YJR019C	P41903	Peroxisomal acyl-CoA thioesterase;likely to be involved in fatty acid oxidation rather than fatty acid synthesis;conserved protein also found in human peroxisomes;TES1 mRNA levels increase during growth on fatty acids	TES1	40.264		1398	3997	10404	Matrix/IM
YKR065C	P36147	Constituent of the TIM23 complex;proposed alternatively to be a component of the import motor (PAM complex) or to interact with and modulate the core TIM23 (Translocase of the Inner mitochondrial Membrane) complex;protein abundance increases in response to DNA replication stress	PAM17	21.9774		1398	1756	2104
YDR036C	P28817	3-hydroxyisobutyryl-CoA hydrolase;member of a family of enoyl-CoA hydratase/isomerases;non-tagged protein is detected in highly purified mitochondria in high-throughput studies;phosphorylated;mutation affects fluid-phase endocytosis	EHD3	56.294		1392	2812	3391
YJR034W	Q02772	Protein required for assembly of cytochrome c oxidase;exists as an oligomer;described as both an integral mitochondrial inner membrane protein facing the intermembrane space (IMS) and as a soluble IMS protein;contains a twin Cx9C motif;imported into the IMS via the MIA import machinery	PET191	12.3967		1379	1616	1780	IMS/IM
YDR337W	P21771	Mitochondrial ribosomal protein of the small subunit	MRPS28	33.0769		1377	2363	2473	Matrix/IM
YMR089C	P40341	Mitochondrial inner membrane m-AAA protease component;mediates degradation of misfolded or unassembled proteins;also required for correct assembly of mitochondrial enzyme complexes;overexpression of human AFG3L2 complements respiratory defect of yeast afg3 yta12 double null mutation, but overexpression of disease-associated AFG3L2 variants does not;expression of both human SPG7 (paraplegin) and A…	YTA12	93.2773		1376	1519	1747	IMS/IM
YOR056C	Q08444	Protein involved in proteasomal and 40S ribosomal subunit biogenesis;required for cleavage of the 20S pre-rRNA to generate the mature 18S rRNA;cleavage is activated by Fun12p, a GTPase and translation initiation factor;relocalizes from nucleus to nucleolus upon DNA replication stress	NOB1	51.7477		1375	981	870
YKR076W	P36156	S-glutathionyl-(chloro)hydroquinone reductase (GS-HQR);glutathione transferase involved in cell-surface biosynthesis and architecture;catalyzes glutathione (GSH)-dependent reduction of GS-trichloro-p-hydroquinone to trichloro-p-hydroquinone;expression upregulated upon exposure to genotoxic agents, such as methyl methanesulfonate, cisplatin and bleomycin;not an essential gene;similar to YGR154C;gr…	ECM4	43.27		1368	1729	7027
YMR157C	Q03798	Protein of unknown function;null mutant displays reduced respiratory growth and elevated frequency of mitochondrial genome loss;the authentic, non-tagged protein is detected in purified mitochondria in high-throughput studies	AIM36	29.0891		1367	1690	1867	IMS/IM
YNL284C	P36520	Mitochondrial ribosomal protein of the large subunit;appears as two protein spots (YmL10 and YmL18) on two-dimensional SDS gels	MRPL10	36.3831		1360	1931	2276	Matrix/IM
YNL306W	P42847	Mitochondrial ribosomal protein of the small subunit;essential for viability, unlike most other mitoribosomal proteins	MRPS18	24.5808		1360	1556	1715	Matrix/IM
YBR022W	P38218	Phosphatase that is highly specific for ADP-ribose 1''-phosphate;a tRNA splicing metabolite;may have a role in regulation of tRNA splicing	POA1	19.939		1341	1342	2130
YJL161W	P46998	Putative protein of unknown function;the authentic, non-tagged protein is detected in highly purified mitochondria in high-throughput studies	FMP33	20.1895		1341	1147	3729	IMS/IM
YNR036C	P53732	Mitochondrial protein;may interact with ribosomes based on co-purification experiments;similar to E. coli and human mitochondrial S12 ribosomal proteins	MRPS12	16.9402		1339	2189	2233	Matrix/IM
YER014W	P40012	Protoporphyrinogen oxidase;a mitochondrial enzyme that catalyzes the seventh step in the heme biosynthetic pathway, converting protoporphyrinogen IX to protoporphyrin IX;inhibited by diphenyl ether-type herbicides	HEM14	59.7207		1338	876	2257	Matrix/IM
YHR038W	P38771	Mitochondrial ribosome recycling factor;essential for mitochondrial protein synthesis and for the maintenance of the respiratory function of mitochondria	RRF1	26.4241		1331	1918	2063	Matrix/IM
YDR232W	P09950	5-aminolevulinate synthase;catalyzes the first step in the heme biosynthetic pathway;an N-terminal signal sequence is required for localization to the mitochondrial matrix;expression is regulated by Hap2p-Hap3p;has a pyridoxal phosphate cofactor whose insertion is mediated by Mcx1p	HEM1	59.362		1325	590	601
YGR200C	P42935	Subunit of Elongator complex;binds to microtubules via conserved alkaline residues;has two seven-bladed WD40 &#946;propellers;Elongator complex is required for modification of wobble nucleosides in tRNA;target of Kluyveromyces lactis zymocin	ELP2	89.3842		1325	1034	1277
YDL120W	Q07540	Mitochondrial matrix iron chaperone;oxidizes and stores iron;interacts with Isu1p to promote Fe-S cluster assembly;mutation results in multiple Fe/S-dependent enzyme deficiencies;human frataxin homolog FXN is mutated in Friedrich's ataxia;human FTL gene can complement yeast yfh1 null mutant	YFH1	19.4853		1321	1348	1471	Matrix/IM
YBL059C-A	Q3E7A4	Protein involved in respiratory chain complex assembly or maintenance;protein of the mitochondrial intermembrane space;contains twin Cx9C motifs that can form coiled coil-helix-coiled-coil helix fold	CMC2	12.9499		1320	2661	2393	OM
YGR286C	P32451	Biotin synthase;catalyzes the conversion of dethiobiotin to biotin, which is the last step of the biotin biosynthesis pathway;complements E. coli bioB mutant	BIO2	41.8919		1315	1133	988	Matrix/IM
YER061C	P39525	Mitochondrial beta-keto-acyl synthase;possible role in fatty acid synthesis;required for mitochondrial respiration;human homolog OXSM can complement yeast cem1 null mutant	CEM1	47.5599		1304	1018	1220
YFL046W	P43557	Putative assembly factor for cytochrome c oxidase;the authentic, non-tagged protein is detected in highly purified mitochondria in high-throughput studies;has similarity to human MCUR1/CCDC90A	FMP32	24.0188		1289	932	1375
YDR405W	P32387	Mitochondrial ribosomal protein of the large subunit	MRP20	30.5766		1287	2390	2343	Matrix/IM
YGR243W	P53311	Highly conserved subunit of the mitochondrial pyruvate carrier (MPC);expressed during growth on nonfermentable carbon sources, and heterodimerizes with Mpc1p to form the respiratory isoform of MPC;MPC localizes to the mitochondrial inner membrane and mediates pyruvate uptake;MPC3 paralog, MPC2, heterodimerizes with Mpc1p to form the fermentative MPC isoform;protein abundance increases in response…	MPC3	16.2421		1285	2503	4920	IMS/IM
YHR162W	P38857	Highly conserved subunit of the mitochondrial pyruvate carrier (MPC);expressed during growth on fermentable carbon sources, and heterodimerizes with Mpc1p to form the fermentative isoform of MPC;MPC localizes to the mitochondrial inner membrane and mediates pyruvate uptake;MPC2 paralog, MPC3, heterodimerizes with Mpc1p to form the respiratory MPC isoform	MPC2	14.5651		1285	2503	4920	IMS/IM
YDR376W	P48360	Oxidoreductase of the mitochondrial inner membrane;involved in cytoplasmic and mitochondrial iron homeostasis and required for activity of Fe-S cluster-containing enzymes;one of the few mitochondrial proteins essential for viability	ARH1	56.2468		1279	881	1655
YHR147C	P32904	Mitochondrial ribosomal protein of the large subunit	MRPL6	23.9022		1266	2400	2941	Matrix/IM
YKL138C	P14063	Mitochondrial ribosomal protein of the large subunit	MRPL31	15.5448		1266	2271	2356	Matrix/IM
YJR101W	P47141	Mitochondrial ribosomal protein of the small subunit	RSM26	30.2278		1264	1780	1706
YCL044C	P25573	Subunit of the mitochondrial (mt) i-AAA protease supercomplex;i-AAA degrades misfolded mitochondrial proteins;forms a subcomplex with Mgr3p that binds to substrates to facilitate proteolysis;required for growth of cells lacking mtDNA	MGR1	47.1656		1261	1352	1459	IMS/IM
YAL046C	P39724	Protein involved in Fe-S cluster transfer to mitochondrial clients;protects [4Fe-4S] clusters from damage due to oxidative stress by acting along with Nfu1p at a late step in the transfer of [4Fe-4S] clusters from the ISA complex to mitochondrial client proteins like lipoate synthase and succinate dehydrogenase;sequence similarity to human BOLA family member, BOLA3, mutations of which are associa…	BOL3	13.3649		1257	1620	1517	Matrix/IM
YOR354C	Q08818	Multicopy suppressor of HER2 involved in mitochondrial translation;mutant is defective in directing meiotic recombination events to homologous chromatids	MSC6	79.9521		1251	1984	1971	Matrix/IM
YML030W	Q03713	Cytochrome c oxidase subunit;required for assembly of the Complex III-Complex IV supercomplex, and for assembly of Cox13p and Rcf2p into cytochrome c oxidase;similar to Rcf2p, and either Rcf1p or Rcf2p is required for late-stage assembly of the Cox12p and Cox13p subunits and for cytochrome c oxidase activity;required for growth under hypoxic conditions;member of the hypoxia induced gene family;C.…	RCF1	18.4827		1236	2460	3303	IMS/IM
YHR003C	P38756	tRNA threonylcarbamoyladenosine dehydratase;required for the ct6A tRNA base modification, where an adenosine at position 37 is modified to form a cyclized active ester with an oxazolone ring;localized to the mitochondrial outer membrane;TCD1 has a paralog, TCD2, that arose from the whole genome duplication	TCD1	48.8808		1233	795	980	OM
YLR439W	P36517	Mitochondrial ribosomal protein of the large subunit;homolog of prokaryotic L29 ribosomal protein;located at the ribosomal tunnel exit	MRPL4	36.9653		1229	2263	2834	Matrix/IM
YNL100W	P50945	Component of the MICOS complex;MICOS (formerly MINOS or MitOS) is a mitochondrial inner membrane complex that extends into the intermembrane space and has a role in the maintenance of crista junctions, inner membrane architecture, and formation of contact sites to the outer membrane;forms a subcomplex with Mic10p and Mic12p whose assembly and stability requires cardiolipin	MIC27	26.9681		1228	2319	2415	IMS/IM
YBR087W	P38251	Subunit of heteropentameric Replication factor C (RF-C);RF-C is a DNA binding protein and ATPase that acts as a clamp loader of the proliferating cell nuclear antigen (PCNA) processivity factor for DNA polymerases delta and epsilon	RFC5	39.9462		1221	860	1027
YLL040C	Q07878	Protein involved in prospore membrane morphogenesis;peripheral membrane protein that localizes to the prospore membrane and at numerous membrane contact sites;involved in sporulation, vacuolar protein sorting, prospore membrane formation during sporulation, and protein-Golgi retention;required for mitochondrial integrity;contains a PH-like domain;homologous to human CHAC and COH1 which are involv…	VPS13	357.776		1216	948	1307
YHL004W	P32902	Mitochondrial ribosomal protein of the small subunit	MRP4	44.1553		1204	2176	2042	Matrix/IM
YOR040W	Q12320	Mitochondrial glyoxalase II;catalyzes the hydrolysis of S-D-lactoylglutathione into glutathione and D-lactate;GLO4 has a paralog, GLO2, that arose from the whole genome duplication	GLO4	32.3393		1204	1044	2585
YER017C	P39925	Mitochondrial inner membrane m-AAA protease component;mediates degradation of misfolded or unassembled proteins;also required for correct assembly of mitochondrial enzyme complexes;involved in cytoplasmic mRNA translation and aging;expression of human homolog AFG3L2 can complement yeast yta12 afg3 double mutant	AFG3	84.5577		1203	1223	1479	Matrix/IM
Q0045	P00401	Subunit I of cytochrome c oxidase (Complex IV);Complex IV is the terminal member of the mitochondrial inner membrane electron transport chain;one of three mitochondrially-encoded subunits	COX1	58.7953		1200	5450	9596
YLR348C	Q06143	Mitochondrial dicarboxylate carrier;integral membrane protein, catalyzes a dicarboxylate-phosphate exchange across the inner mitochondrial membrane, transports cytoplasmic dicarboxylates into the mitochondrial matrix	DIC1	33.006		1191	1169	4234
YJL180C	P22135	Assembly factor for F1 sector of mitochondrial F1F0 ATP synthase;conserved protein;required for assembly of alpha and beta subunits into F1 sector of mitochondrial F1F0 ATP synthase;human homolog ATPAF2 can complement yeast atp12 mutant;mutation of human homolog reduces active ATP synthase levels and is associated with the disorder ATPAF2 deficiency	ATP12	36.5597		1186	1602	1819	Matrix/IM
YGR028W	P28737	Highly-conserved N-terminally anchored AAA-ATPase;distributed in the mitochondrial outer membrane and peroxisomes;involved in mitochondrial protein sorting;functions as an extraction engine in local organelle surveillance to remove and initiate degradation of mistargeted proteins, ensuring fidelity of organelle-specific localization of tail-anchored proteins;contains an N-terminal transmembrane d…	MSP1	40.3398		1185	1801	1471	OM
YBL090W	P38175	Mitochondrial ribosomal protein of the small subunit;MRP21 exhibits genetic interactions with mutations in the COX2 and COX3 mRNA 5'-untranslated leader sequences	MRP21	20.4132		1180	2153	2282	Matrix/IM
YER092W	P40060	Non-essential INO80 chromatin remodeling complex subunit;deletion affects telomere maintenance via recombination	IES5	14.299		1180	623	794
YAR035W	P80235	Outer mitochondrial carnitine acetyltransferase;minor ethanol-inducible enzyme involved in transport of activated acyl groups from the cytoplasm into the mitochondrial matrix;phosphorylated	YAT1	77.7614		1174	1369	8293
YNL315C	P32453	Molecular chaperone;required for the assembly of alpha and beta subunits into the F1 sector of mitochondrial F1F0 ATP synthase;N-terminally propionylated in vivo	ATP11	36.8577		1162	1851	1649	Matrix/IM
YNR037C	P53733	Mitochondrial ribosomal protein of the small subunit;has similarity to E. coli S19 ribosomal protein	RSM19	10.2842		1148	2609	2134
YNL252C	P36528	Mitochondrial ribosomal protein of the large subunit	MRPL17	32.218		1147	1973	2134	Matrix/IM
YNL026W	P53969	Component of the Sorting and Assembly Machinery (SAM) complex;the SAM (or TOB) complex is located in the mitochondrial outer membrane;the complex binds precursors of beta-barrel proteins and facilitates their outer membrane insertion;homologous to bacterial Omp85	SAM50	54.4116		1144	985	1511	IMS/IM
YNL310C	P42844	Protein co-chaperone with a zinc finger motif;essential for protein import into mitochondria;may act with Pam18p to facilitate recognition and folding of imported proteins by Ssc1p (mtHSP70) in the mitochondrial matrix;required for the maintenance of Ssc1p solubility and assists in the functional interaction of Ssc1p with substrate proteins	ZIM17	19.8664		1143	1024	1156	Matrix/IM
YOR158W	P17558	Mitochondrial ribosomal protein of the small subunit;PET123 exhibits genetic interactions with PET122, which encodes a COX3 mRNA-specific translational activator	PET123	36.0188		1130	1679	1851	Matrix/IM
YOR090C	Q12511	Mitochondrial type 2C protein phosphatase (PP2C);involved in regulation of pyruvate dehydrogenase activity by dephosphorylating the serine 133 of the Pda1p subunit;localizes to the intermembrane space and is imported via the presequence pathway and processed by the inner membrane protease (Imp1p-Imp2p);acts in concert with kinases Pkp1p and Pkp2p and phosphatase Ptc6p	PTC5	63.6746		1123	885	1564	IMS/IM
YPR100W	Q06090	Mitochondrial ribosomal protein of the large subunit	MRPL51	16.1381		1104	1561	1646
YHR199C	P38885	Protein of unknown function;the authentic, non-tagged protein is detected in highly purified mitochondria in high-throughput studies;null mutant displays elevated frequency of mitochondrial genome loss	AIM46	34.1218		1081	1091	1225	IMS/IM
YNR015W	P53720	Dihydrouridine synthase;member of a family of dihydrouridine synthases including Dus1p, Smm1p, Dus3p, and Dus4p;modifies uridine residues at position 20 of cytoplasmic tRNAs	SMM1	42.827		1081	928	788	Matrix/IM
YBR251W	P33759	Mitochondrial ribosomal protein of the small subunit	MRPS5	34.8986		1075	1698	1826	Matrix/IM
YKL167C	P32388	Mitochondrial ribosomal protein of the large subunit;not essential for mitochondrial translation	MRP49	16.026		1075	1428	1525
YHR070W	P38793	tRNA(m(1)G37)methyltransferase;methylates a tRNA base adjacent to the anticodon that has a role in prevention of frameshifting;localized to both cytoplasm and mitochondria, and modifies both cytoplasmic and mitochondrial tRNAs;mutations in human ortholog TRMT5 are associated with skeletal muscle respiratory chain deficiencies, and trm5 mutations analogous to disease mutations decrease respiration	TRM5	56.525		1054	826	807	Matrix/IM
YNL177C	P53881	Mitochondrial ribosomal protein of the large subunit	MRPL22	34.9209		1054	1454	1606	Matrix/IM
YDR231C	Q04935	Mitochondrial inner membrane protein;required for proteolytic processing of Cox2p and its assembly into cytochrome c oxidase	COX20	23.7663		1022	1758	1963	IMS/IM
YGR033C	P53220	Nonessential component of the TIM23 complex;interacts with the Translocase of the Outer Mitochondrial membrane (TOM complex) and with respiratory enzymes;may regulate the Translocase of the Inner Mitochondrial membrane (TIM23 complex) activity	TIM21	27.228		1015	1042	1707	Matrix/IM
YPL222W	Q08968	Putative protein of unknown function;proposed to be involved in responding to environmental stresses;the authentic, non-tagged protein is detected in highly purified mitochondria in high-throughput studies	FMP40	78.2944		1014	936	2972	Matrix/IM
YMR301C	P40416	Mitochondrial inner membrane ATP-binding cassette (ABC) transporter;exports mitochondrially synthesized precursors of iron-sulfur (Fe/S) clusters to the cytosol;human homolog ABCB7 can complement yeast null mutant	ATM1	77.5462		1007	855	953
YHL032C	P32190	Glycerol kinase;converts glycerol to glycerol-3-phosphate;glucose repression of expression is mediated by Adr1p and Ino2p-Ino4p;derepression of expression on non-fermentable carbon sources is mediated by Opi1p and Rsf1p	GUT1	79.8292		1005	2834	10355	Matrix/IM
YDR061W	Q12298	Protein with similarity to ABC transporter family members;lacks predicted membrane-spanning regions;transcriptionally activated by Yrm1p along with genes involved in multidrug resistance		61.189		1002	999	1062	Matrix/IM
YOR125C	P41735	Protein required for ubiquinone (Coenzyme Q) biosynthesis;localizes to the matrix face of the mitochondrial inner membrane in a large complex with ubiquinone biosynthetic enzymes;required for gluconeogenic gene activation	CAT5	26.061		991	1208	796
YBR146W	P38120	Mitochondrial ribosomal protein of the small subunit	MRPS9	31.9528		987	1702	1828
YPL118W	Q02950	Mitochondrial ribosomal protein of the small subunit;MRP51 exhibits genetic interactions with mutations in the COX2 and COX3 mRNA 5'-untranslated leader sequences	MRP51	39.4671		987	1330	1436	Matrix/IM
YNL063W	P53944	S-adenosylmethionine-dependent methyltransferase;methylates translational release factor Mrf1p;similar to E.coli PrmC;is not an essential gene	MTQ1	35.8863		985	842	676
YKL087C	Q00873	Cytochrome c1 heme lyase;involved in maturation of cytochrome c1, which is a subunit of the mitochondrial ubiquinol-cytochrome-c reductase;links heme covalently to apocytochrome c1;human homolog HCCS can complement yeast cyt2 null mutant	CYT2	26.0755		983	977	1139	IMS/IM
YGR165W	P53292	Mitochondrial ribosomal protein of the small subunit;null mutant does not grow on glycerol, is sensitive to 2,4-dichlorophenol, and accumulates large lipid droplets	MRPS35	39.5978		975	2433	1813	Matrix/IM
YCR003W	P25348	Mitochondrial ribosomal protein of the large subunit;protein abundance increases in response to DNA replication stress	MRPL32	21.4554		970	856	889	Matrix/IM
YGR031W	P53219	Conserved mitochondrial protein of unknown function;processed by both mitochondrial processing peptidase and mitochondrial octapeptidyl aminopeptidase;gene contains the nested antisense gene NAG1	IMO32	38.5171		957	1030	1376	Matrix/IM
YIL098C	P40491	Mitochondrial matrix protein;required for assembly or stability at high temperature of the F1 sector of mitochondrial F1F0 ATP synthase;null mutant temperature sensitive growth on glycerol is suppressed by multicopy expression of Odc1p	FMC1	18.3723		945	1604	1653	Matrix/IM
YEL052W	P32317	Protein that may act as a chaperone for cytochrome c oxidase subunits;conserved protein;may act as a chaperone in the degradation of misfolded or unassembled cytochrome c oxidase subunits;localized to matrix face of the mitochondrial inner membrane;member of the AAA family but lacks a protease domain	AFG1	58.2723		943	1349	1224	Matrix/IM
YJR085C	P47131	Protein of unknown function;GFP-fusion protein is induced in response to the DNA-damaging agent MMS;the authentic, non-tagged protein is detected in highly purified mitochondria in high-throughput studies;protein abundance increases in response to DNA replication stress	TMH11	11.2543		937	1309	1752
YMR193W	P36525	Mitochondrial ribosomal protein of the large subunit;two mitochondrial ribosomal proteins, YmL14 and YmL24, have been assigned to the same gene	MRPL24	30.0797		920	1393	1577	Matrix/IM
YOR196C	P32875	Protein involved in biosynthesis of the coenzyme lipoic acid;has similarity to E. coli lipoic acid synthase	LIP5	46.269		918	802	875	Matrix/IM
YBR255C-A	Q3E776	Putative protein of unknown function;may interact with respiratory chain complexes III (ubiquinol-cytochrome c reductase) or IV (cytochrome c oxidase);identified by sequence comparison with hemiascomycetous yeast species	RCF3	13.747		909	1739	2584	IMS/IM
YDL217C	Q12328	Essential core component of the mitochondrial TIM22 complex;involved in insertion of polytopic proteins into the inner membrane;forms the channel through which proteins are imported	TIM22	21.8632		909	904	1051	Matrix/IM
YDR296W	Q06630	Mitochondrial ribosomal protein of the large subunit;also involved in homologous recombination in mitochondria;required for recombination-dependent mtDNA partitioning;involved in stimulation of mitochondrial DNA replication in response to oxidative stress	MHR1	26.9071		889	1704	2162	Matrix/IM
YER168C	P21269	ATP (CTP):tRNA-specific tRNA nucleotidyltransferase;different forms targeted to the nucleus, cytosol, and mitochondrion are generated via the use of multiple transcriptional and translational start sites;human homolog TRNT1 complements yeast null mutant	CCA1	62.4886		889	715	832
YBR176W	P38122	Ketopantoate hydroxymethyltransferase;required for pantothenic acid biosynthesis, converts 2-oxoisovalerate into 2-dehydropantoate	ECM31	34.4683		877	850	1074
YDR261C	P52911	Exo-1,3-beta-glucanase;involved in cell wall beta-glucan assembly;may be anchored to the plasma membrane via a glycosylphosphatidylinositol (GPI) anchor	EXG2	63.4925		854	362	399
YGR220C	P31334	Mitochondrial ribosomal protein of the large subunit	MRPL9	29.814		853	1499	1478	Matrix/IM
YOR020W-A	Q3E824	Putative protein of unknown function;conserved in A. gossypii;the authentic, non-tagged protein is detected in highly purified mitochondria in high-throughput studies	MCO10	9.6188		853	828	2788	IMS/IM
YER050C	P40033	Mitochondrial ribosomal protein of the small subunit;has similarity to E. coli S18 ribosomal protein	RSM18	15.8558		852	1569	1663	Matrix/IM
YPL135W	Q03020	Conserved protein of the mitochondrial matrix;performs a scaffolding function during assembly of iron-sulfur clusters, interacts physically and functionally with yeast frataxin (Yfh1p);ISU1 has a paralog, ISU2, that arose from the whole genome duplication;isu1 isu2 double mutant is inviable;human homolog ISCU implicated in mitochondrial myopathy, can complement isu1 isu2 double mutant	ISU1	17.9044		852	755	1679	Matrix/IM
YJL096W	P40858	Mitochondrial ribosomal protein of the large subunit	MRPL49	18.4069		850	1559	1680	Matrix/IM
YNL129W	P53915	Nicotinamide riboside kinase;catalyzes the phosphorylation of nicotinamide riboside and nicotinic acid riboside in salvage pathways for NAD+ biosynthesis	NRK1	27.6878		845	369	457
YDR175C	Q03976	Mitochondrial ribosomal protein of the small subunit	RSM24	37.4019		844	1426	1421	Matrix/IM
YBR282W	P36526	Mitochondrial ribosomal protein of the large subunit;homolog of human Bcl-2 interacting protein BMRP	MRPL27	16.5094		842	1353	1428	Matrix/IM
YMR256C	P10174	Subunit VII of cytochrome c oxidase (Complex IV);Complex IV is the terminal member of the mitochondrial inner membrane electron transport chain	COX7	6.9415		834	1812	3240
YDR286C	Q05530	Putative protein of unknown function;predicted to have thiol-disulfide oxidoreductase active site	MGP12	13.4237		828	908	989
YLR290C	Q05892	Putative oxidoreductase, subunit of Coenzyme Q biosynthetic complexes;required for synthesis of wild-type levels of Coenzyme Q (ubiquinone);member of the short-chain dehydrogenase/reductase (SDR) superfamily;orthologous gene in some other fungi is fused to the COQ10 ortholog	COQ11	31.5367		814	733	1232	Matrix/IM
YMR228W	P14908	Mitochondrial RNA polymerase specificity factor;has structural similarity to S-adenosylmethionine-dependent methyltransferases and functional similarity to bacterial sigma-factors;Mtf1p interacts with and stabilizes the Rpo41p-promoter complex, enhancing DNA bending and melting to facilitate pre-initiation open complex formation	MTF1	39.7241		814	880	1042
YDR494W	Q03430	Mitochondrial ribosomal protein of the small subunit;genetic interactions suggest a possible role in promoting translation initiation	RSM28	41.2428		813	1235	1539	Matrix/IM
YDR305C	P49775	Dinucleoside triphosphate hydrolase;has similarity to the tumor suppressor FHIT and belongs to the histidine triad (HIT) superfamily of nucleotide-binding proteins	HNT2	24.7886		804	596	928	Matrix/IM
YJL112W	P47025	Peripheral protein of cytosolic face of mitochondrial outer membrane;required for mitochondrial fission;interacts with Fis1p and with the self-assembled oligomeric form of the dynamin-related GTPase Dnm1p;contains WD repeats;MDV1 has a paralog, CAF4, that arose from the whole genome duplication	MDV1	80.016		799	1221	1109	OM
YPL252C	Q12184	Ferredoxin of the mitochondrial matrix;required for formation of cellular iron-sulfur proteins;involved in heme A biosynthesis;human homolog FDX1L can complement yeast by allowing growth during down-regulation of yeast YAH1	YAH1	18.9267		791	565	551
YJR091C	P47135	Member of the Puf family of RNA-binding proteins;interacts with mRNAs encoding membrane-associated proteins;involved in localizing the Arp2/3 complex to mitochondria;overexpression causes increased sensitivity to benomyl;JSN1 has a paralog, PUF2, that arose from the whole genome duplication	JSN1	120.368		790	488	706
YBR037C	P23833	Copper-binding protein of mitochondrial inner membrane;required for cytochrome c oxidase activity and respiration;may function to deliver copper to cytochrome c oxidase;similar to thioredoxins;SCO1 has a paralog, SCO2, that arose from the whole genome duplication	SCO1	33.1743		765	1142	1116	IMS/IM
YDR204W	O13525	Protein with a role in ubiquinone (Coenzyme Q) biosynthesis;possibly functioning in stabilization of Coq7p;located on matrix face of mitochondrial inner membrane;component of a mitochondrial ubiquinone-synthesizing complex;human homolog COQ4 can complement yeast coq4 null mutant	COQ4	38.6438		763	618	666	Matrix/IM
YLR356W	Q06485	Mitochondrial mitophagy-specific protein;required primarily for mitophagy induced at post-log phase;not required for other types of selective autophagy or macroautophagy;conserved within fungi, but not in higher eukaryotes;ATG33 has a paralog, SCM4, that arose from the whole genome duplication	ATG33	20.3996		762	796	1181	OM
YDR041W	Q03201	Mitochondrial ribosomal protein of the small subunit;has similarity to E. coli S10 ribosomal protein;essential for viability, unlike most other mitoribosomal proteins	RSM10	23.4302		754	1394	1452	Matrix/IM
YGR257C	P53320	Mitochondrial protein of the mitochondrial carrier family;high affinity pyridoxal 5'-phosphate (PLP) transporter, important for delivery of PLP cofactor to mitochondrial enzymes;involved in mitochondrial iron homeostasis and in activating mitochondrial Sod2p by facilitating insertion of an essential manganese cofactor	MTM1	40.779		754	507	512	IMS/IM
YAL008W	P18411	Integral mitochondrial outer membrane (MOM) protein;dosage suppressor of an MDM10 null that reduces ERMES-related phenotypes, such as alterations in mitochondrial morphology, protein complex assembly, and lipid profile;dosage suppressor of MDM12, MDM34, and MMM1 null mutant growth defects;novel mechanism of MOM import involving Tom70p, the TOM complex, and the TIM23 complex, requiring mitochondri…	FUN14	22.0817		751	757	1377	IMS/IM
YDL044C	P10849	Mitochondrial protein that interacts with mitochondrial RNA polymerase;interacts with an N-terminal region of mitochondrial RNA polymerase (Rpo41p) and couples RNA processing and translation to transcription	MTF2	51.1898		749	1218	788	Matrix/IM
YPL270W	P33311	Mitochondrial inner membrane half-type ABC transporter;required for respiratory growth at high temperature;localizes to vacuole membrane in response to H2O2;similar to human TAP1 and TAP2 implicated in bare lymphocyte syndrome and Wegener-like granulomatosis	MDL2	85.1552		747	834	1017	Matrix/IM
YBR024W	P38072	Protein anchored to mitochondrial inner membrane;may have a redundant function with Sco1p in delivery of copper to cytochrome c oxidase;interacts with Cox2p;SCO2 has a paralog, SCO1, that arose from the whole genome duplication	SCO2	34.8919		742	783	1016	IMS/IM
YJL054W	P47045	Component of the mitochondrial TIM22 complex;involved in insertion of polytopic proteins into the inner membrane	TIM54	54.1762		741	690	817	IMS/IM
YNR041C	P32378	Para hydroxybenzoate polyprenyl transferase;catalyzes the second step in ubiquinone (coenzyme Q) biosynthesis;human COQ2, mutations in which are implicated in an increased risk of mutiple-system atrophy, can complement a yeast coq2 null mutant	COQ2	41.0261		718	890	756	Matrix/IM
YBR268W	P36532	Mitochondrial ribosomal protein of the large subunit	MRPL37	11.9559		707	1086	1075	Matrix/IM
YJL045W	P47052	Minor succinate dehydrogenase isozyme;participates in oxidation of succinate and transfer of electrons to ubiquinone;induced during the diauxic shift in a Cat8p-dependent manner;YJL045W has a paralog, SDH1, that arose from the whole genome duplication		69.3814		704	554	1479
YGL169W	P32579	Protein involved in threonylcarbamoyl adenosine biosynthesis;Sua5p and Qri7p are necessary and sufficient for RNA t6A modification in vitro;null mutant lacks N6-threonylcarbamoyl adenosine (t6A) modification in the anticodon loop of ANN-decoding tRNA;member of conserved YrdC/Sua5 family;binds single-stranded telomeric DNA and null mutant has abnormal telomere length	SUA5	46.5379		699	738	784	IMS/IM
YPL196W	Q08952	Protein of unknown function required for oxidative damage resistance;required for normal levels of resistance to oxidative damage;null mutants are sensitive to hydrogen peroxide;member of a conserved family of proteins found in eukaryotes	OXR1	30.7716		698	771	1388
YOR221C	Q12283	Predicted malonyl-CoA:ACP transferase;putative component of a type-II mitochondrial fatty acid synthase that produces intermediates for phospholipid remodeling	MCT1	40.7057		696	408	683	Matrix/IM
YDR079W	P38958	Chaperone that facilitates the assembly of cytochrome c oxidase;integral to the mitochondrial inner membrane;interacts with a subcomplex of subunits VII, VIIa, and VIII (Cox7p, Cox9p, and Cox8p) but not with the holoenzyme	PET100	13.1927		695	1219	956	IMS/IM
YNL256W	P53848	Multifunctional enzyme of the folic acid biosynthesis pathway;has dihydropteroate synthetase, dihydro-6-hydroxymethylpterin pyrophosphokinase, and dihydroneopterin aldolase activities	FOL1	93.1088		694	405	487	Matrix/IM
YNL066W	P53616	Cell wall protein related to glucanases;possibly involved in cell wall septation;member of the SUN family;SUN4 has a paralog, SIM1, that arose from the whole genome duplication	SUN4	43.4174		691	313	345
YMR194C-B	Q3E7A9	Protein that localizes to the mitochondrial intermembrane space;localizes via the Mia40p-Erv1p system;contains twin cysteine-x(9)-cysteine motifs	CMC4	8.2037		683	542	1357	IMS/IM
YPL013C	Q02608	Mitochondrial ribosomal protein of the small subunit	MRPS16	13.6523		679	1404	1478
YBR003W	P18900	Hexaprenyl pyrophosphate synthetase;catalyzes the first step in ubiquinone (coenzyme Q) biosynthesis	COQ1	52.5672		676	647	557	Matrix/IM
YOL096C	P27680	O-methyltransferase;catalyzes two different O-methylation steps in ubiquinone (Coenzyme Q) biosynthesis;component of a mitochondrial ubiquinone-synthesizing complex;phosphoprotein	COQ3	36.3293		654	609	743	Matrix/IM
YHR106W	P38816	Mitochondrial thioredoxin reductase;involved in protection against oxidative stress, required with Glr1p to maintain the redox state of Trx3p;contains active-site motif (CAVC) present in prokaryotic orthologs;binds NADPH and FAD;TRR2 has a paralog, TRR1, that arose from the whole genome duplication	TRR2	37.0858		650	411	1227
YLR393W	P18496	Assembly factor for the F0 sector of mitochondrial F1F0 ATP synthase;mitochondrial inner membrane protein;interacts genetically with ATP6	ATP10	32.1073		649	961	1190	Matrix/IM
YDR237W	P36519	Mitochondrial ribosomal protein of the large subunit;MRPL7 produces both YmL5 and YmL7, which are two different modified forms of the same protein	MRPL7	33.1145		645	937	964	Matrix/IM
YLR090W	P39102	Chaperone with a role in facilitating mitochondrial protein import;ascomycete-specific member of the DnaJ-like family, closely related to Ydj1p;predicted to be C-terminally prenylated;the authentic, non-tagged protein is detected in highly purified mitochondria in high-throughput studies	XDJ1	51.3361		630	460	503	OM
YOR274W	P07884	Delta 2-isopentenyl pyrophosphate:tRNA isopentenyl transferase;required for biosynthesis of isopentenyladenosine in mitochondrial and cytoplasmic tRNAs;also has a role in tRNA gene-mediated silencing;gene encodes two isozymic forms;converts to a prion form, prion conversion contributes to azole antifungal resistance by upregulating ergosterol biosynthesis;homolog of human TRIT1, a mutation in whi…	MOD5	50.2493		629	383	606	Matrix/IM
YBR192W	P38127	Mitochondrial pyrimidine nucleotide transporter;imports pyrimidine nucleoside triphosphates and exports pyrimidine nucleoside monophosphates;member of the mitochondrial carrier family	RIM2	42.1202		623	512	686	IMS/IM
YDR268W	P04803	Mitochondrial tryptophanyl-tRNA synthetase	MSW1	43.0239		619	762	695	Matrix/IM
YNR022C	P53724	Mitochondrial ribosomal protein of the large subunit;not essential for mitochondrial translation	MRPL50	16.286		612	984	1255	Matrix/IM
YDR316W	Q06668	Protein integral to the mitochondrial membrane;has a conserved methyltransferase motif and is predicted to be an RNA methyltransferase;multicopy suppressor of respiratory defects caused by OXA1 mutations	OMS1	55.6109		611	794	879	IMS/IM
Q0140	P02381	Mitochondrial ribosomal protein of the small subunit;mitochondrially-encoded;polymorphic in different strains due to variation in number of AAT (asparagine) codons;translated near the mitochondrial inner membrane;may have a role in loss of mitochondrial DNA under stress conditions	VAR1	47.1552		607	815	1024	Matrix/IM
Q0120	P03879	Mitochondrial mRNA maturase;forms a complex with Nam2p to mediate splicing of the bI4 intron of the COB gene;encoded by both exon and intron sequences of partially processed COB mRNA	BI4	74.618		602	401	400
YLR390W	Q06011	Protein of unknown function;the authentic, non-tagged protein is detected in highly purified mitochondria in high-throughput studies	ECM19	12.5186		598	601	844	IMS/IM
YOR130C	Q12375	Ornithine transporter of the mitochondrial inner membrane;exports ornithine from mitochondria as part of arginine biosynthesis;functionally complemented by human ortholog, SLC25A15, which is associated with hyperammonaemia-hyperornithinaemia-homocitrullinuria (HHH) syndrome, but HHH-associated variants fail to complement	ORT1	31.53		595	263	308
YPR166C	P10663	Mitochondrial ribosomal protein of the small subunit	MRP2	13.5553		595	1028	951
YNR040W	P53736	Putative protein of unknown function;the authentic, non-tagged protein is detected in highly purified mitochondria in high-throughput studies	DPI29	28.6576		594	877	779	Matrix/IM
YER019W	P40015	Inositol phosphosphingolipid phospholipase C;mitochondrial membrane localized;hydrolyzes complex sphingolipids to produce ceramide;activates genes required for non-fermentable carbon source metabolism during diauxic shift;activated by phosphatidylserine, cardiolipin, and phosphatidylglycerol;mediates Na+ and Li+ halotolerance;ortholog of mammalian neutral sphingomyelinase type 2	ISC1	53.9411		590	471	501	OM
YDR201W	Q03954	Essential subunit of the Dam1 complex (aka DASH complex);complex couples kinetochores to the force produced by MT depolymerization thereby aiding in chromosome segregation;also localized to nuclear side of spindle pole body	SPC19	18.9007		589	522	558
YLR395C	P04039	Subunit VIII of cytochrome c oxidase (Complex IV);Complex IV is the terminal member of the mitochondrial inner membrane electron transport chain	COX8	8.9179		587	3130	3433
YNL133C	P53913	Protein of unknown function;required for survival upon exposure to K1 killer toxin;proposed to regulate double-strand break repair via non-homologous end-joining	FYV6	20.0432		583	518	413
YGL018C	P53193	Specialized J-protein that functions in Fe-S cluster biogenesis;functions with Hsp70 in Fe-S cluster biogenesis in mitochondria;involved in iron metabolism;contains a J domain typical to J-type chaperones;localizes to the mitochondrial matrix	JAC1	21.7791		575	716	730	Matrix/IM
YIL087C	P40502	Protein of unknown function;mitochondrial protein that physically interacts with Tim23p;null mutant displays reduced respiratory growth	AIM19	16.9318		575	983	1865	IMS/IM
YDL085W	Q07500	Mitochondrial external NADH dehydrogenase;catalyzes the oxidation of cytosolic NADH;Nde1p and Nde2p are involved in providing the cytosolic NADH to the mitochondrial respiratory chain;NDE2 has a paralog, NDE1, that arose from the whole genome duplication	NDE2	61.6648		571	443	5497
YER087W	P39965	Protein with similarity to tRNA synthetases;non-tagged protein is detected in purified mitochondria;null mutant is viable and displays elevated frequency of mitochondrial genome loss	AIM10	65.8811		571	674	782	Matrix/IM
YBR122C	P36531	Mitochondrial ribosomal protein of the large subunit;overproduction suppresses mutations in the COX2 leader peptide-encoding region	MRPL36	20.101		570	916	968	Matrix/IM
YGL080W	P53157	Highly conserved subunit of mitochondrial pyruvate carrier (MPC);MPC is a mitochondrial inner membrane complex that mediates pyruvate uptake and comprises Mpc1p and Mpc2p during fermentative growth, or Mcp1p and Mpc3p during respiratory growth;null mutant displays slow growth that is complemented by expression of human or mouse ortholog;mutation in human ortholog MPC1 is associated with lactic ac…	MPC1	15.0025		565	916	1203	IMS/IM
YJL133C-A	Q3E7A3	Putative protein of unknown function;the authentic, non-tagged protein is detected in highly purified mitochondria in high-throughput studies	DPI8	7.749		554	846	1139	Matrix/IM
YPL015C	P53686	Cytoplasmic NAD(+)-dependent protein deacetylase;deacetylation targets are primarily cytoplasmic proteins;member of the silencing information regulator 2 (Sir2) family of NAD(+)-dependent protein deacetylases;modulates nucleolar (rDNA) and telomeric silencing;possesses NAD(+)-dependent histone deacetylase activity in vitro;contains a nuclear export signal (NES);function regulated by its nuclear e…	HST2	39.9676		553	334	399
YLR077W	Q08023	Protein required for assembly of respiratory complex III;mitochondrial inner membrane protein;required for an early step in assembly of respiratory complex III (cytochrome bc1 complex);mRNA is targeted to mitochondria	FMP25	66.7038		528	852	937	IMS/IM
YGL041W-A	P0C5N3	Putative protein of unknown function;conserved in fungi;identified by expression profiling and mass spectrometry	DPC13	18.1125		525	584	689	Matrix/IM
YBL095W	P38172	Protein that associates with mitochondrial ribosome;likely functions in cristae junction formation;the authentic, non-tagged protein is detected in highly purified mitochondria in high-throughput studies	MRX3	30.5468		524	548	725	IMS/IM
YIL111W	P00425	Subunit Vb of cytochrome c oxidase;cytochrome c oxidase is the terminal member of the mitochondrial inner membrane electron transport chain;Cox5Bp is predominantly expressed during anaerobic growth while its isoform Va (Cox5Ap) is expressed during aerobic growth;COX5B has a paralog, COX5A, that arose from the whole genome duplication	COX5B	17.205		521	154	341
YPL097W	P48527	Mitochondrial tyrosyl-tRNA synthetase	MSY1	55.3011		511	1070	905
YER183C	P40099	5,10-methenyltetrahydrofolate synthetase;involved in folic acid biosynthesis	FAU1	24.057		510	374	427	Matrix/IM
YOR236W	P07807	Dihydrofolate reductase involved in tetrahydrofolate biosynthesis;required for respiratory metabolism;mutation is functionally complemented by human DHFR	DFR1	24.2623		499	391	470
YML129C	P39103	Mitochondrial cytochrome c oxidase (complex IV) assembly factor;also involved in translational regulation of Cox1p and prevention of Cox1p aggregation before assembly;associates with complex IV assembly intermediates and complex III/complex IV supercomplexes;located in the mitochondrial membrane	COX14	7.9591		497	1093	1294	IMS/IM
YCL047C	P25576	Nicotinamide mononucleotide-specific adenylyltransferase (NMNAT);catalyzes the conversion of nicotinamide mononucleotide (NMN) to nicotinamide adenine dinucleotide (NAD+);role in the nicotinamide riboside (NR) salvage pathway of NAD+ biosynthesis;involved in NR and NAD+ homeostasis;ATPase involved in protein quality control and filamentation pathways;interacts physically with Kss1p and suppresses…	POF1	29.6757		492	312	440
YER078C	P40051	Mitochondrial aminopeptidase;cleaves the N termini of at least 38 imported proteins after cleavage by the mitochondrial processing peptidase (MPP), thereby increasing their stability;member of the aminopeptidase P family	ICP55	57.9843		487	324	434	Matrix/IM
YNR003C	P32910	RNA polymerase III subunit C34;interacts with TFIIIB70 and is a key determinant in pol III recruitment by the preinitiation complex	RPC34	36.1265		486	385	431
YOL042W	Q08213	Putative endonuclease;has a domain similar to a magnesium-dependent endonuclease motif in mRNA deadenylase Ccr4p;the authentic, non-tagged protein is detected in highly purified mitochondria in high-throughput studies	NGL1	42.4013		484	373	499	Matrix/IM
YMR060C	P50110	Component of the Sorting and Assembly Machinery (SAM) complex;the SAM (or TOB) complex is located in the mitochondrial outer membrane;binds precursors of beta-barrel proteins and facilitates their outer membrane insertion;contributes to SAM complex stability	SAM37	37.4932		482	383	525	OM
YBL098W	P38169	Kynurenine 3-monooxygenase;required for the de novo biosynthesis of NAD from tryptophan via kynurenine;expression regulated by Hst1p;putative therapeutic target for Huntington disease	BNA4	52.4351		481	500	547
YMR130W	Q04223	Putative protein of unknown function;YMR130W is not an essential gene	DPI35	35.2736		467	355	363	Matrix/IM
YMR225C	P19956	Mitochondrial ribosomal protein of the large subunit;protein abundance increases in response to DNA replication stress	MRPL44	11.4816		465	695	742	Matrix/IM
YHR083W	P14693	Component of the sorting and assembly machinery (SAM) complex;the SAM (or TOB) complex is located in the mitochondrial outer membrane;the complex binds precursors of beta-barrel proteins and facilitates their insertion into the outer membrane	SAM35	37.4036		462	430	533
YDL164C	P04819	DNA ligase I found in nucleus and mitochondria;essential enzyme that joins Okazaki fragments during DNA replication;also acts in ribonucleotide excision repair, base excision repair, and recombination;DNA ligase I mutants trigger ubiquitination of PCNA at K107, facilitating Rad59p-mediated bypass of unligated Okazaki fragments;human homolog LIG1 can complement yeast cdc9 temperature-sensitive mut…	CDC9	84.8303		457	401	356	IMS/IM
YGL226W	P53077	Protein of unknown function;green fluorescent protein (GFP)-fusion protein localizes to the mitochondrion;mtc3 is synthetically sick with cdc13-1	MTC3	14.4929		452	996	1268	IMS/IM
YPL132W	P19516	Protein required for delivery of copper to Cox1p;mitochondrial inner membrane protein;association with mitochondrial ribosomes suggests that copper delivery may occur during translation of Cox1p	COX11	34.0495		452	828	855	IMS/IM
YMR115W	Q04472	Subunit of the mitochondrial (mt) i-AAA protease supercomplex;i-AAA degrades misfolded mitochondrial proteins;forms a subcomplex with Mgr1p that binds to substrates to facilitate proteolysis;required for growth of cells lacking mtDNA	MGR3	58.0085		451	382	492	IMS/IM
YOR246C	Q08651	Protein proposed to be involved in vacuolar functions;mutant shows defect in CPY processing and defects in vacuolar morphology;has similarity to oxidoreductases, found in lipid particles;required for replication of Brome mosaic virus in S. cerevisiae, a model system for studying replication of positive-strand RNA viruses in their natural hosts	ENV9	37.4889		441	228	200
YDR449C	Q02354	Nucleolar protein;component of the small subunit (SSU) processome containing the U3 snoRNA that is involved in processing of pre-18S rRNA	UTP6	52.43		440	331	322
YPR155C	Q12374	Protein that regulates expression of Fo-F1 ATP synthase subunits;involved in the regulation of mitochondrial expression of subunits 6 (Atp6p) and 8 (Atp8p) of the Fo-F1 ATP synthase;functions with Nca3p	NCA2	70.8583		439	634	1105	OM
YKR087C	P36163	Metalloendopeptidase of the mitochondrial inner membrane;important for adaptive responses to various homeostatic insults, preservation of normal mitochondrial function under damage-eliciting conditions, and stability of respiratory supercomplexes;involved in turnover of membrane-embedded proteins;mediates degradation of Cox1p in coa2 mutant cells;zebrafish ortholog has a role in organ development…	OMA1	39.3388		432	428	587	IMS/IM
YGL119W	P27697	ATPase required for ubiquinone biosynthesis and respiratory growth;maintains levels of CoQ biosynthetic proteins;binds to CoQ biosynthesis intermediates;UbiB protein kinase-like family member that lacks canonical protein kinase activity;similar to prokaryotic proteins involved in ubiquinone biosynthesis;human homolog ADCK3 complements a coq8 null, is associated with CoQ and respiratory-chain defi…	COQ8	56.7594		431	766	1168	Matrix/IM
YMR113W	Q12676	Dihydrofolate synthetase, involved in folic acid biosynthesis;catalyzes conversion of dihydropteroate to dihydrofolate in folate coenzyme biosynthesis;FOL3 has a paralog, RMA1, that arose from the whole genome duplication	FOL3	47.8477		430	335	420
YNR020C	P53722	Putative metalloprotease of the mitochondrial inner membrane;required for processing of Atp6p;has an additional role in assembly of the F0 sector of the F1F0 ATP synthase complex;substrate of the Mia40p-Erv1p disulfide relay system, and folding is assisted by Mia40p	ATP23	32.2362		424	365	443	IMS/IM
YGR147C	P37293	Protein of unknown function;has an apparent role in acetylation of N-terminal methionine residues	NAT2	32.828		421	504	569	IMS/IM
YPR047W	P08425	Mitochondrial phenylalanyl-tRNA synthetase;active as a monomer, unlike the cytoplasmic subunit which is active as a dimer complexed to a beta subunit dimer;similar to the alpha subunit of E. coli phenylalanyl-tRNA synthetase	MSF1	54.8315		421	568	667	Matrix/IM
YLR218C	Q05809	Twin Cx(9)C protein involved in cytochrome c oxidase organization;organization includes assembly or stability;localizes to the mitochondrial intermembrane space via the Mia40p-Erv1p system;interacts genetically with CYC1 and with cytochrome c oxidase assembly factors	COA4	17.2579		416	508	590	IMS/IM
YKL106W	Q01802	Mitochondrial aspartate aminotransferase;catalyzes the conversion of oxaloacetate to aspartate in aspartate and asparagine biosynthesis	AAT1	51.807		410	231	612	Matrix/IM
YDR049W	Q04311	Component of a Cdc48p-complex involved in protein quality control;exhibits cytosolic and ER-membrane localization, with Cdc48p, during normal growth, and contributes to ER-associated degradation (ERAD) of specific substrates at a step after their ubiquitination;forms a mitochondrially-associated complex with Cdc48p and Npl4p under oxidative stress that is required for ubiquitin-mediated mitochond…	VMS1	72.7454		395	301	284
YJL205C	Q02820	Protein of unknown function;involved in secretion of proteins that lack classical secretory signal sequences;SWAT-GFP and mCherry fusion proteins localize to the cytosol	NCE101	6.3406		389	705	931
YGR112W	P53266	Mitochondrial inner membrane protein required for complex IV assembly;associates with complex IV assembly intermediates and complex III/complex IV supercomplexes;similar to human SURF1 involved in Leigh Syndrome;complex IV is also known as cytochrome c oxidase	SHY1	45.0797		379	611	857	IMS/IM
YHR100C	P38812	Mitochondrial phosphatidylglycerophosphatase (PGP phosphatase);dephosphorylates phosphatidylglycerolphosphate to generate phosphatidylglycerol, an essential step during cardiolipin biosynthesis;null mutant is sensitive to tunicamycin, DTT	GEP4	20.9494		377	666	693	Matrix/IM
YIR021W	P07266	Splicing protein;required for splicing of two mitochondrial group I introns (BI3 in COB and AI5beta in COX1);forms a splicing complex, containing four subunits of Mrs1p and two subunits of the BI3-encoded maturase, that binds to the BI3 RNA;MRS1 has a paralog, CCE1, that arose from the whole genome duplication	MRS1	41.2984		375	342	604	Matrix/IM
YML080W	P53759	Dihydrouridine synthase;member of a widespread family of conserved proteins including Smm1p, Dus3p, and Dus4p;modifies pre-tRNA(Phe) at U17	DUS1	48.14		370	333	317
YFL001W	P31115	tRNA:pseudouridine synthase;introduces pseudouridines at position 38 or 39 in tRNA;also responsible for pseudouracil modification of some mRNAs;important for maintenance of translation efficiency and normal cell growth, localizes to both the nucleus and cytoplasm;non-essential for viability	DEG1	50.9075		363	175	242
YJR122W	P47158	Protein involved in incorporating iron-sulfur clusters into proteins;mitochondrial matrix protein;involved in the incorporation of iron-sulfur clusters into mitochondrial aconitase-type proteins;activates the radical-SAM family members Bio2p and Lip5p;interacts with Ccr4p in the two-hybrid system	IBA57	57.0563		361	338	209	Matrix/IM
YNL081C	P53937	Putative mitochondrial ribosomal protein of the small subunit;has similarity to E. coli S13 ribosomal protein;participates in controlling sporulation efficiency;localizes to vacuole in response to H2O2	SWS2	16.1063		357	641	648	Matrix/IM
YER058W	Q02771	Protein required for assembly of cytochrome c oxidase	PET117	12.2863		338	604	699	IMS/IM
YJR003C	P47084	Protein that associates with mitochondrial ribosome;detected in highly purified mitochondria in high-throughput studies;predicted to be involved in ribosome biogenesis	MRX12	59.7552		338	270	337	Matrix/IM
YBR179C	P38297	Mitofusin;integral membrane protein involved in mitochondrial outer membrane tethering and fusion;role in mitochondrial genome maintenance;efficient tethering and degradation of Fzo1p requires an intact N-terminal GTPase domain;targeted for destruction by the ubiquitin ligase SCF-Mdm30p and the cytosolic ubiquitin-proteasome system	FZO1	97.8049		337	247	249	OM
YAL029C	P32492	Type V myosin motor involved in actin-based transport of cargos;required for mRNA transport, including ASH1 mRNA, and facilitating the growth and movement of ER tubules into the growing bud along with She3p;MYO4 has a paralog, MYO2, that arose from the whole genome duplication	MYO4	169.346		336	159	152
YBR104W	P38087	Putative mitochondrial inner membrane transporter;proposed role in oleate metabolism and glutamate biosynthesis;member of the mitochondrial carrier (MCF) family;YMC2 has a paralog, YMC1, that arose from the whole genome duplication	YMC2	36.5647		336	113	108	IMS/IM
YHR017W	P32792	Non-essential mitochondrial protein of unknown function;mRNA induced during meiosis, peaking between mid to late prophase of meiosis I;similar to S. douglasii YSD83	YSC83	44.2445		330	329	455	OM
YGL107C	P53140	Mitochondrial protein required for respiratory growth;mutant phenotype and genetic interactions suggest a role in delivering mt mRNAs to ribosomes;located on matrix face of the inner membrane and loosely associated with mitoribosomes;RMD9 has a paralog, YBR238C, that arose from the whole genome duplication	RMD9	74.5986		329	375	396	Matrix/IM
YKL026C	P36014	Phospholipid hydroperoxide glutathione peroxidase;induced by glucose starvation that protects cells from phospholipid hydroperoxides and nonphospholipid peroxides during oxidative stress;GPX1 has a paralog, HYR1, that arose from the whole genome duplication	GPX1	19.4888		328	339	1864
YDR115W	Q04598	Putative mitochondrial ribosomal protein of the large subunit;similar to E. coli L34 ribosomal protein;required for respiratory growth, as are most mitochondrial ribosomal proteins;protein increases in abundance and relocalizes to the plasma membrane upon DNA replication stress	MRX14	12.0536		327	1173	2154
YDR512C	Q04406	Non-essential protein of unknown function;required for transcriptional induction of the early meiotic-specific transcription factor IME1, also required for sporulation;contains twin cysteine-x9-cysteine motifs;deletion affects mitochondrial morphology	EMI1	21.0751		326	349	662	IMS/IM
YKR079C	P36159	tRNA 3'-end processing endonuclease tRNase Z;also localized to mitochondria and interacts genetically with Rex2 exonuclease;homolog of the human candidate prostate cancer susceptibility gene ELAC2	TRZ1	96.7907		326	284	322	Matrix/IM
YBL107C	P38162	Mitochondrial intermembrane space protein of unknown function;imported via the MIA import machinery;contains an unusual twin cysteine motif (CX13C CX14C)	MIX23	22.9661		322	234	189	IMS/IM
YER046W	P40031	Meiosis-specific protein required for prospore membrane morphogenesis;required for the proper shape of the prospore membrane (PSM) and for spore wall formation;functions cooperatively with SPO71 in PSM elongation;physically interacts with Spo71p;genetically antagonistic to SPO1, similar to SPO71;localizes to the PSM;required for spore wall formation during sporulation;dispensable for both nuclear…	SPO73	16.599		321	202	283	OM
YOR266W	P38969	Mitochondrial integral inner membrane protein;involved in membrane insertion of C-terminus of Cox2p, interacts genetically and physically with Cox18p;deletion mutant sensitive to the anti-Pneumocystis carinii drug pentamidine	PNT1	48.9525		297	385	489	Matrix/IM
YBL059W	P34224	Putative protein of unknown function;the authentic, non-tagged protein is detected in highly purified mitochondria in high-throughput studies;YBL059W has a paralog, YER093C-A, that arose from the whole genome duplication	IAI11	22.2934		296	706	795	IMS/IM
YDL157C	Q12082	Putative protein of unknown function;the authentic, non-tagged protein is detected in highly purified mitochondria in high-throughput studies		13.5688		290	491	384	IMS/IM
YNL003C	P38921	S-adenosylmethionine transporter of the mitochondrial inner membrane;member of the mitochondrial carrier family;required for biotin biosynthesis and respiratory growth	PET8	31.0403		283	245	288
YOL053W	Q08223	Protein of unknown function;null mutant displays elevated frequency of mitochondrial genome loss	AIM39	45.8684		281	437	676	IMS/IM
YHR116W	P38824	Protein that functions in mitochondrial copper homeostasis;mitochondrial intermembrane space protein;essential for functional cytochrome oxidase expression;homologous to Cox17p;contains twin cysteine-x9-cysteine motifs	COX23	17.319		278	622	616	IMS/IM
YPL224C	Q08970	Putative metal transporter involved in mitochondrial iron accumulation;MMT2 has a paralog, MMT1, that arose from the whole genome duplication	MMT2	52.4339		273	148	195	IMS/IM
YHR067W	P38790	Mitochondrial 3-hydroxyacyl-thioester dehydratase;involved in fatty acid biosynthesis, required for respiratory growth and for normal mitochondrial morphology	HTD2	33.0626		267	270	365
YKR036C	P36130	WD40 repeat-containing protein associated with the CCR4-NOT complex;interacts in a Ccr4p-dependent manner with Ssn2p;also interacts with Fis1p, Mdv1p and Dnm1p and plays a role in mitochondrial fission;CAF4 has a paralog, MDV1, that arose from the whole genome duplication	CAF4	72.8079		265	199	268	OM
YGR222W	P10834	Mitochondrial inner membrane protein;binds to the 5' UTR of the COX3 mRNA to activate its translation together with Pet122p and Pet494p;also binds to the COX1 Group I intron AI5 beta to facilitate exon ligation during splicing	PET54	34.6448		260	318	412	Matrix/IM
YER145C	P40088	High affinity iron permease;involved in the transport of iron across the plasma membrane;forms complex with Fet3p;expression is regulated by iron;protein abundance increases in response to DNA replication stress	FTR1	45.7278		258	112	129	OM
YIL077C	P40508	Putative protein of unknown function;the authentic, non-tagged protein is detected in highly purified mitochondria in high-throughput studies;deletion confers sensitivity to 4-(N-(S-glutathionylacetyl)amino) phenylarsenoxide (GSAO)	RCI37	36.9505		258	367	540	IMS/IM
YKL071W	P36086	Putative protein of unknown function;expression induced in cells treated with the mycotoxin patulin, and also the quinone methide triterpene celastrol;green fluorescent protein (GFP)-fusion protein localizes to the cytoplasm		28.0436		255	218	1001
YJR100C	P47140	Protein of unknown function;non-tagged protein is detected in purified mitochondria in high-throughput studies;similar to murine NOR1;null mutant is viable and displays elevated frequency of mitochondrial genome loss	AIM25	37.4831		251	242	322	Matrix/IM
YLR188W	P33310	Mitochondrial inner membrane half-type ABC transporter;mediates export of peptides generated upon proteolysis of mitochondrial proteins;plays a role in the regulation of cellular resistance to oxidative stress	MDL1	75.9813		249	259	276	Matrix/IM
YJL102W	P39677	Mitochondrial elongation factor involved in translational elongation	MEF2	91.2781		248	427	476	Matrix/IM
YLR305C	P37297	Phosphatidylinositol-4-kinase;functions in the Pkc1p protein kinase pathway;required for normal vacuole morphology, cell wall integrity, and actin cytoskeleton organization	STT4	214.608		247	190	195	OM
YBL038W	P38064	Mitochondrial ribosomal protein of the large subunit;homologous to bacterial L16 ribosomal protein;synthetic lethality with hac1 mutation suggests a possible role in synthesis of precursors for protein glycosylation	MRPL16	26.5455		244	470	605	Matrix/IM
YNL073W	P32048	Mitochondrial lysine-tRNA synthetase;required for import of both aminoacylated and deacylated forms of tRNA(Lys) into mitochondria and for aminoacylation of mitochondrially encoded tRNA(Lys)	MSK1	66.141		243	258	310
YHR011W	P38705	Probable mitochondrial seryl-tRNA synthetase;mutant displays increased invasive and pseudohyphal growth	DIA4	50.3996		240	337	461
YJL143W	P39515	Essential component of the TIM23 complex;with Tim23p, contributes to the architecture and function of the import channel;may link the import motor to the core Translocase of the Inner Mitochondrial membrane (TIM23 complex)	TIM17	16.5905		239	297	249	IMS/IM
YHL038C	P03874	Required for splicing of the group I intron bI5 of the COB pre-mRNA;nuclear-encoded mitochondrial protein that binds to the RNA to promote splicing;also involved in but not essential for splicing of the COB bI2 intron and the intron in the 21S rRNA gene	CBP2	73.8759		238	250	306	Matrix/IM
YJL005W	P08678	Adenylate cyclase;required for cAMP production and cAMP-dependent protein kinase signaling;the cAMP pathway controls a variety of cellular processes, including metabolism, cell cycle, stress response, stationary phase, and sporulation	CYR1	227.831		238	178	249
YLL018C-A	Q3E731	Protein required for cytochrome c oxidase assembly;located in the cytosol and mitochondrial intermembrane space;putative copper metallochaperone that delivers copper to cytochrome c oxidase;contains twin cysteine-x9-cysteine motifs	COX19	11.1017		233	265	415	IMS/IM
YGR021W	P53212	Putative protein of unknown function;the authentic, non-tagged protein is detected in highly purified mitochondria in high-throughput studies	DPC29	31.6942		231	556	595
YCR024C	P25345	Mitochondrial asparaginyl-tRNA synthetase	SLM5	56.7915		229	255	448	Matrix/IM
YDR375C	P32839	Protein translocase and chaperone required for Complex III assembly;member of the AAA ATPase family;forms a homo-oligomeric complex in the mitochondrial inner membrane that translocates the C-terminal domain of Rip1p from the matrix across the inner membrane and delivers it to an assembly intermediate of respiratory Complex III;also required for assembly of the Qcr10p subunit;mutation is function…	BCS1	51.1131		223	261	271
YLL006W	P41800	ER integral membrane protein, ERMES complex subunit;ERMES links the ER to mitochondria and may promote inter-organellar calcium and phospholipid exchange as well as coordinating mitochondrial DNA replication and growth;required for mitophagy;ERMES complex is often co-localized with peroxisomes and with concentrated areas of pyruvate dehydrogenase	MMM1	48.6494		223	202	221	OM
YDR470C	Q03327	Outer membrane component of the mitochondrial fusion machinery;binds to Fzo1p and Mgm1p to link these two GTPases during mitochondrial fusion;involved in fusion of both the outer and inner membranes;facilitates dimerization of Fzo1p during fusion;import into the outer membrane is mediated by Tom70p and Mim1p;has similarity to carrier proteins but likely not a transporter;similar to human SLC25A46…	UGO1	57.5414		221	275	411	OM
YPR140W	Q06510	Lyso-phosphatidylcholine acyltransferase;required for normal phospholipid content of mitochondrial membranes;major determinant of the final acyl chain composition of the mitochondrial-specific phospholipid cardiolipin;mutations in human ortholog tafazzin (TAZ) cause Barth syndrome, a rare X-linked disease characterized by skeletal and cardiomyopathy and bouts of cyclic neutropenia;a specific spli…	TAZ1	44.192		220	143	173	IMS/IM
YJL131C	P47015	Mitochondrial translation initiation factor 3 (IF3, mIF3);evolutionarily conserved;binds to E. coli ribosomes in vitro;null mutant displays severe respiratory growth defect and elevated frequency of mitochondrial genome loss	AIM23	41.4908		217	317	397	Matrix/IM
YKL194C	P07236	Mitochondrial threonyl-tRNA synthetase;aminoacylates both the canonical threonine tRNA tT(UGU)Q1 and the unusual threonine tRNA tT(UAG)Q2 in vitro;lacks a typical editing domain, but has pre-transfer editing activity stimulated by the unusual tRNA-Thr	MST1	54.0976		214	270	295	Matrix/IM
YLR253W	Q06567	Mitochondrial protein of unknown function involved in lipid homeostasis;associates with mitochondrial ribosome;integral membrane protein that localizes to the mitochondrial inner membrane;involved in mitochondrial morphology;non-essential gene which interacts genetically with MDM10, and other members of the ERMES complex;transcription is periodic during the metabolic cycle;homologous to human aar…	MCP2	65.9299		213	242	273	IMS/IM
YDL104C	P43122	Protein involved in threonylcarbamoyl adenosine biosynthesis;Sua5p and Qri7p are necessary and sufficient for RNA t6A modification in vitro;highly conserved mitochondrial protein;essential for t6A modification of mitochondrial tRNAs that decode ANN codons;similar to Kae1p and E. coli YgjD, both of which are also required for tRNA t6A modification;when directed to the cytoplasm, complements the es…	QRI7	45.5451		212	385	455	Matrix/IM
Q0085	P00854	Subunit a of the F0 sector of mitochondrial F1F0 ATP synthase;mitochondrially encoded;translation is specifically activated by Atp22p;ATP6 and ATP8 mRNAs are not translated in the absence of the F1 sector of ATPase;mutations in human ortholog MT-ATP6 are associated with neurodegenerative disorders such as Neurogenic Ataxia and Retinitis Pigmentosa (NARP), Leigh syndrome (LS), Charcot-Marie-Tooth …	ATP6	29.1001		209	551	885
YML050W	Q04689	Protein of unknown function;null mutant is viable and displays elevated frequency of mitochondrial genome loss	AIM32	35.9826		208	320	508	Matrix/IM
YPL104W	P15179	Mitochondrial aspartyl-tRNA synthetase;required for acylation of aspartyl-tRNA;yeast and bacterial aspartyl-, asparaginyl-, and lysyl-tRNA synthetases contain regions with high sequence similarity, suggesting a common ancestral gene	MSD1	75.4715		208	372	364	Matrix/IM
YPL183W-A	O14464	Protein involved in translation;mutants have defects in biogenesis of nuclear ribosomes;sequence similar to prokaryotic ribosomal protein L36, may be a mitochondrial ribosomal protein;protein abundance increases in response to DNA replication stress	RTC6	10.7163		206	389	489	Matrix/IM
YEL050C	P32611	Mitochondrial ribosomal protein of the large subunit (L2);has similarity to E. coli L2 ribosomal protein;mutant allele (fat21) causes inability to utilize oleate, and induce oleic acid oxidation;may interfere with activity of the Adr1p transcription factor	RML2	43.835		201	395	473	IMS/IM
YHR059W	P38783	Protein of unknown function;required for survival upon exposure to K1 killer toxin	FYV4	15.3079		201	348	391	Matrix/IM
YPR067W	Q12425	Protein required for maturation of mitochondrial [4Fe-4S] proteins;functions in a complex with Isa1p and possibly Iba57p;localizes to the mitochondrial intermembrane space, overexpression of ISA2 suppresses grx5 mutations	ISA2	20.8779		200	288	333
YMR061W	P25298	Component of the cleavage and polyadenylation factor I (CF I);CF 1, composed of the CF 1A complex (Rna14p, Rna15p, Clp1p, Pcf11p) and Hrp1, is involved in cleavage and polyadenylation of mRNA 3' ends;bridges interaction between Rna15p and Hrp1p in the CF I complex;mutant displays reduced transcription elongation in the G-less-based run-on (GLRO) assay;required for gene looping and maintenance of …	RNA14	79.9531		198	151	189
YOL008W	Q08058	Coenzyme Q (ubiquinone) binding protein;functions in the delivery of Q<sub>6</sub> to its proper location for electron transport during respiration;START domain protein with homologs in bacteria and eukaryotes;respiratory growth defect of the null mutant is functionally complemented by human COQ10A	COQ10	23.7803		198	197	225
YEL059C-A	Q05676	Subunit of the mitochondrial inner membrane peptidase (IMP);IMP is required for maturation of mitochondrial proteins of the intermembrane space;Som1p facilitates cleavage of a subset of substrates;contains twin cysteine-x9-cysteine motifs	SOM1	8.4146		197	140	156
YJR062C	P40354	Amidase;removes the amide group from N-terminal asparagine and glutamine residues to generate proteins with N-terminal aspartate and glutamate residues that are targets of ubiquitin-mediated degradation	NTA1	51.8833		194	149	189	Matrix/IM
YKL155C	P36056	Mitochondrial ribosomal protein of the small subunit;also predicted to be an S-adenosylmethionine-dependent RNA methyltransferase	RSM22	72.2134		193	245	237	Matrix/IM
YLR382C	P11325	Mitochondrial leucyl-tRNA synthetase;also has direct role in splicing of several mitochondrial group I introns;indirectly required for mitochondrial genome maintenance;human homolog LARS2 can complement yeast null mutant, and is implicated in Perrault syndrome	NAM2	101.929		188	264	371	Matrix/IM
YBR238C	P38330	Mitochondrial membrane protein;not required for respiratory growth but causes a synthetic respiratory defect in combination with rmd9 mutations;transcriptionally up-regulated by TOR;deletion increases life span;YBR238C has a paralog, RMD9, that arose from the whole genome duplication		83.7602		179	145	145	Matrix/IM
YMR003W	Q03673	Protein of unknown function;GFP-fusion protein localizes to the mitochondria;null mutant is viable and displays reduced frequency of mitochondrial genome loss	AIM34	22.759		179	355	204	Matrix/IM
YBL080C	P33893	Subunit of the trimeric GatFAB AmidoTransferase(AdT) complex;involved in the formation of Q-tRNAQ;mutation is functionally complemented by the bacterial GatB ortholog	PET112	61.8694		178	179	238	Matrix/IM
YGL236C	P53070	Mitochondrial protein;forms heterodimer complex with Mss1p that performs 5-carboxymethylaminomethyl modification of the wobble uridine base in mitochondrial tRNAs;required for respiration in paromomycin-resistant 15S rRNA mutants;human homolog MTO1 can complement yeast null mutant	MTO1	74.2213		174	263	342	Matrix/IM
YPL103C	Q02883	Protein with a role in maintaining mitochondrial morphology;also involved in maintaining normal cardiolipin levels;mitochondrial inner membrane protein;proposed to be involved in N-acylethanolamine metabolism;related to mammalian N-acylPE-specific phospholipase D	FMP30	54.3704		173	246	224	IMS/IM
YBR185C	P38300	Membrane-associated mitochondrial ribosome receptor;forms a complex with Mdm38p that may facilitate recruitment of mRNA-specific translational activators to ribosomes;possible role in protein export from the matrix to inner membrane	MBA1	31.8276		170	379	365	Matrix/IM
YPL107W	Q02873	Putative protein of unknown function;green fluorescent protein (GFP)-fusion protein localizes to mitochondria;YPL107W is not an essential gene	DPC25	28.5822		168	260	367	Matrix/IM
YKL018C-A	Q3E7A7	Putative protein of unknown function;identified by homology;green fluorescent protein (GFP)-fusion protein localizes to the cytoplasm	MCO12	11.8189		165	206	522	OM
YGL064C	P53166	Mitochondrial ATP-dependent RNA helicase of the DEAD-box family;required for assembly of the large subunit of mitochondrial ribosomes;binds to the large subunit rRNA, 21S_rRNA;localizes to the matrix face of the mitochondrial inner membrane and associates with the large subunit precursor and with mature ribosomes	MRH4	63.0946		160	252	166	Matrix/IM
YGL143C	P30775	Mitochondrial translation release factor;involved in stop codon recognition and hydrolysis of the peptidyl-tRNA bond during mitochondrial translation;lack of MRF1 causes mitochondrial genome instability	MRF1	46.7757		160	221	248	Matrix/IM
YIR024C	P40576	F1F0 ATP synthase peripheral stalk assembly factor;subunit of the matrix-exposed inner mitochondrial membrane localized INA complex (Ina22p-Ina17p) involved in assembly of the F1F0 peripheral stalk;co-purifies with Aim43p, ATP synthase subunits, and cytochrome bc1 complex assembly factors;interacts with Arh1p, a mitochondrial oxidoreductase;deletion mutant has a respiratory growth defect	INA22	24.6001		156	203	258	IMS/IM
YLR151C	Q12524	8-oxo-dGTP diphosphatase;prevents spontaneous mutagenesis via sanitization of oxidized purine nucleoside triphosphates;can also act as peroxisomal pyrophosphatase with specificity for coenzyme A and CoA derivatives, may function to remove potentially toxic oxidized CoA disulfide from peroxisomes to maintain the capacity for beta-oxidation of fatty acids;nudix hydrolase family member;similar E. co…	PCD1	39.7502		156	178	379
YKL137W	P36064	Copper-binding protein of the mitochondrial intermembrane space;evolutionarily conserved;may be involved in delivering copper from the matrix to the cytochrome c oxidase complex;contains a twin CX9C motif	CMC1	13.0133		155	183	502	IMS/IM
YLR084C	Q12465	N-glycosylated protein;involved in the maintenance of bud site selection during bipolar budding;localization requires Rax1p;RAX2 mRNA stability is regulated by Mpt5p	RAX2	133.909		152	122	152	OM
YGL211W	P53088	Protein required for uridine thiolation of Gln, Lys, and Glu tRNAs;required for the thiolation of uridine at the wobble position of Gln, Lys, and Glu tRNAs;has a role in urmylation and in invasive and pseudohyphal growth;inhibits replication of Brome mosaic virus in S. cerevisiae	NCS6	39.9998		149	136	137
YGR171C	P22438	Mitochondrial methionyl-tRNA synthetase (MetRS);functions as a monomer in mitochondrial protein synthesis;functions similarly to cytoplasmic MetRS although the cytoplasmic form contains a zinc-binding domain not found in Msm1p	MSM1	66.7451		149	164	177	Matrix/IM
YJL133W	P10566	Iron transporter, mediates Fe2+ transport across inner mito membrane;mitochondrial carrier family member;active under low-iron conditions;may transport other cations;MRS3 has a paralog, MRS4, that arose from the whole genome duplication	MRS3	34.5059		149	94	95
YBR044C	P38228	Protein involved in assembly of the succinate dehydrogenase complex;mitochondrial;putative chaperone	TCM62	64.2678		147	219	239	Matrix/IM
YDL027C	Q07349	Protein that associates with mitochondrial ribosome;the authentic, non-tagged protein is detected in highly purified mitochondria in high-throughput studies;YDL027C is not an essential gene	MRX9	48.343		145	178	258	Matrix/IM
YOR226C	Q12056	Mitochondrial protein required for iron-sulfur protein synthesis;performs scaffolding function during Fe/S cluster assembly;involved in Fe-S cluster assembly for both mitochondrial and cytosolic proteins;protein abundance increases under DNA replication stress;ISU2 has a paralog, ISU1, that arose from the whole genome duplication;isu1 isu2 double mutant is inviable;human homolog ISCU implicated i…	ISU2	16.939		145	33	57	Matrix/IM
YLR099W-A	Q3E798	Mitochondrial protein required for outer membrane protein import;involved in import of the subset of proteins with multiple alpha-helical transmembrane segments, including Ugo1p, Tom20p, and Fzo1p;component of a large protein complex in the outer membrane that includes Mim1p;not essential in W303 strain background	MIM2	9.9762		144	148	161	OM
YAL048C	P39722	Outer mitochondrial membrane GTPase, subunit of the ERMES complex;potential regulatory subunit of the ERMES complex that links the ER to mitochondria and may promote inter-organellar calcium and phospholipid exchange as well as coordinating mitochondrial DNA replication and growth;cells lacking Gem1p contain collapsed, globular, or grape-like mitochondria;ortholog of metazoan Miro GTPases	GEM1	75.1389		143	148	198	OM
YDL119C	Q07534	Mitochondrial glycine transporter;required for the transport of glycine into mitochondria for initiation of heme biosynthesis, with YMC1 acting as a secondary transporter;homolog of human SLC25A38, a mitochondrial glycine transporter associated with nonsyndromic autosomal recessive congenital sideroblastic anemia;human SLC25A38 can complement the heme deficiency associated with the null mutant;GF…	HEM25	34.2221		141	92	117	IMS/IM
YKR052C	P23500	Iron transporter of the mitochondrial carrier family;mediates Fe2+ transport across the inner mitochondrial membrane;active under low-iron conditions;may transport other cations;protein abundance increases in response to DNA replication stress;MRS4 has a paralog, MRS3, that arose from the whole genome duplication	MRS4	33.3099		141	66	170	IMS/IM
YMR087W	Q04299	Putative ADP-ribose-1''-monophosphatase;converts ADP-ribose-1''-monophosphate to ADP-ribose;may have a role in tRNA splicing;contains an A1pp domain	PDL32	32.0676		139	159	221	Matrix/IM
YIL042C	P40530	Mitochondrial protein kinase;involved in negative regulation of pyruvate dehydrogenase complex activity by phosphorylating the ser-133 residue of the Pda1p subunit;acts in concert with kinase Pkp2p and phosphatases Ptc5p and Ptc6p	PKP1	45.4483		138	211	449	Matrix/IM
YML021C	P12887	Uracil-DNA glycosylase;required for repair of uracil in DNA formed by spontaneous cytosine deamination;efficiently excises uracil from single-stranded DNA in vivo;not required for strand-specific mismatch repair;cell-cycle regulated, expressed in late G1;localizes to mitochondria and nucleus	UNG1	40.4837		136	89	48
YOL023W	P25038	Mitochondrial translation initiation factor 2	IFM1	75.6686		136	207	237	Matrix/IM
YPL072W	Q02863	Deubiquitinating enzyme anchored to the outer mitochondrial membrane;probably not important for general mitochondrial functioning, but may perform a more specialized function at mitochondria	UBP16	56.9379		136	116	229	OM
YGR281W	P53049	Plasma membrane ATP-binding cassette (ABC) transporter;multidrug transporter mediates export of many different organic anions including oligomycin;homolog of human cystic fibrosis transmembrane receptor (CFTR)	YOR1	166.732		133	58	76	OM
YGL057C	P53171	Protein of unknown function;null mutant exhibits a respiratory growth defect and synthetic interactions with prohibitin (phb1) and gem1;authentic, non-tagged protein is detected in highly purified mitochondria in high-throughput studies	GEP7	32.9673		129	247	212	IMS/IM
YOL009C	Q92328	Mitochondrial outer membrane protein, ERMES complex subunit;required for transmission of mitochondria to daughter cells;required for mitophagy;may influence import and assembly of outer membrane beta-barrel proteins;ERMES complex is often co-localized with peroxisomes and with concentrated areas of pyruvate dehydrogenase	MDM12	30.7017		127	55	136
YCR079W	P25646	Mitochondrial type 2C protein phosphatase (PP2C);has similarity to mammalian PP1Ks;involved in mitophagy;null mutant is sensitive to rapamycin and has decreased phosphorylation of the Pda1 subunit of pyruvate dehydrogenase	PTC6	49.4195		124	53	123	Matrix/IM
YDR406W	Q04182	Plasma membrane ATP binding cassette (ABC) transporter;multidrug transporter and general stress response factor implicated in cellular detoxification;regulated by Pdr1p, Pdr3p and Pdr8p;promoter contains a PDR responsive element;PDR15 has a paralog, PDR5, that arose from the whole genome duplication	PDR15	172.264		121	63	77	Matrix/IM
YPL099C	Q02888	F1F0 ATPase synthase peripheral stalk assembly factor;subunit of the matrix-exposed inner mitochondrial membrane localized INA complex (Ina22p-Ina17p) involved in assembly of the F1F0 peripheral stalk;co-purifies with Ina22p and ATP synthase subunits;null mutant displays elevated frequency of mitochondrial genome loss and has a respiratory growth defect	INA17	21.8485		121	183	242	IMS/IM
YHL018W	P38744	Putative 4a-hydroxytetrahydrobiopterin dehydratase;green fluorescent protein (GFP)-fusion protein localizes to mitochondria and is induced in response to the DNA-damaging agent MMS	MCO14	14.0283		117	118	165	Matrix/IM
YHL014C	P38746	Protein of unknown function;has weak similarity to E. coli GTP-binding protein gtp1;the authentic, non-tagged protein is detected in highly purified mitochondria in high-throughput studies	YLF2	45.7151		114	191	194	Matrix/IM
YER047C	P39955	Putative ATPase of the AAA family;interacts with the Sin1p transcriptional repressor in the two-hybrid system	SAP1	100.344		109	79	129
Q0050	P03875	Reverse transcriptase required for splicing of the COX1 pre-mRNA;encoded by a mobile group II intron within the mitochondrial COX1 gene	AI1	96.1469		105	105	136	Matrix/IM
YPR083W	Q06820	Mitochondrial protein;required for normal mitochondrial morphology and inheritance;component of the mitochondria-ER-cortex-ancor (MECA);interacts with Num1p to link the ER and mitochondria at the cell cortex;proposed involvement in the formation of Dnm1p and Num1p-containing cortical anchor complexes that promote mitochondrial fission	MDM36	64.9392		105	130	139
YFR045W	P43617	Putative mitochondrial transport protein;null mutant is viable, exhibits decreased levels of chitin and normal resistance to calcofluor white		34.4085		103	189	160	Matrix/IM
YLR283W	Q05867	Putative protein of unknown function;green fluorescent protein (GFP)-fusion protein localizes to mitochondria;YLR283W is not an essential gene		36.5756		102	126	146	IMS/IM
YGR087C	P26263	Minor isoform of pyruvate decarboxylase;decarboxylates pyruvate to acetaldehyde, involved in amino acid catabolism;transcription is glucose- and ethanol-dependent, and is strongly induced during sulfur limitation	PDC6	61.5718		101	106	487
YJL071W	P40360	Acetylglutamate synthase (glutamate N-acetyltransferase);mitochondrial enzyme that catalyzes the first step in the biosynthesis of the arginine precursor ornithine;forms a complex with Arg5,6p	ARG2	65.6199		99	87	143	Matrix/IM
YMR210W	Q03649	Monoacylglycerol lipase;palmitoyl monoacylglycerol is the preferred substrate;role in triacylglycerol catabolism;minor role in medium-chain fatty acid ethyl ester biosynthesis;contains an alpha/beta hydrolase domain and a typical lipase motif;has similarity to acyltransferases, Eeb1p and Eht1p, and human ABHD1	MGL2	51.4432		99	59	84
YKL101W	P34244	Nim1p-related protein kinase;septin-binding kinase that localizes to the bud neck septin ring and regulates the morphogenesis checkpoint;phosphorylates Hsl7p and cooperates with Elm1p to recruit Hsl7p to the mother-bud neck, as a prerequisite for the subsequent recruitment, phosphorylation, and degradation of Swe1p;autophosphorylation enhances interactions with Hsl7p	HSL1	169.646		98	100	112
YAL010C	P18409	Subunit of both the ERMES and the SAM complex;component of ERMES complex which acts as a molecular tether between the mitochondria and the ER, necessary for efficient phospholipid exchange between organelles and for mitophagy;SAM/TOB complex component that functions in the assembly of outer membrane beta-barrel proteins;involved in mitochondrial inheritance and morphology;ERMES complex is often c…	MDM10	56.2365		96	109	141	OM
YJR149W	P47177	Putative protein of unknown function;green fluorescent protein (GFP)-fusion protein localizes to the cytoplasm		45.1625		96	232	287
YJL046W	P47051	Putative lipoate-protein ligase;required along with Lip2 and Lip5 for lipoylation of Lat1p and Kgd2p;similar to E. coli LplA;null mutant displays reduced frequency of mitochondrial genome loss	AIM22	47.0039		92	143	121	Matrix/IM
YKR031C	P36126	Phospholipase D;catalyzes the hydrolysis of phosphatidylcholine, producing choline and phosphatidic acid;involved in Sec14p-independent secretion;required for meiosis and spore formation;differently regulated in secretion and meiosis;participates in transcription initiation and/or early elongation of specific genes;interacts with """"""""foot domain"""""""" of RNA polymerase II;deletion results i…	SPO14	195.204		90	29	37	Matrix/IM
YML091C	Q02773	Protein subunit of mitochondrial RNase P;has roles in nuclear transcription, cytoplasmic and mitochondrial RNA processing, and mitochondrial translation;distributed to mitochondria, cytoplasmic processing bodies, and the nucleus	RPM2	139.341		90	65	77	Matrix/IM
YGL059W	P53170	Mitochondrial protein kinase;negatively regulates activity of the pyruvate dehydrogenase complex by phosphorylating the ser-133 residue of the Pda1p subunit;acts in concert with kinase Pkp1p and phosphatases Ptc5p and Ptc6p;relocalizes from mitochondrion to cytoplasm upon DNA replication stress	PKP2	57.2964		86	156	162	Matrix/IM
YOL081W	P19158	GTPase-activating protein;negatively regulates RAS by converting it from the GTP- to the GDP-bound inactive form, required for reducing cAMP levels under nutrient limiting conditions;IRA2 has a paralog, IRA1, that arose from the whole genome duplication;defects in human homolog NF1 are associated with neurofibromatosis	IRA2	351.651		85	67	148
YDL177C	Q12257	Putative protein of unknown function;similar to the mouse IMPACT gene;YDL177C is not an essential gene		19.0723		83	63	72	Matrix/IM
YPL029W	P32580	ATP-dependent RNA helicase;component of the mitochondrial degradosome along with the RNase Dss1p;the degradosome associates with the ribosome and mediates RNA turnover;also required during splicing of the COX1 AI5_beta intron;expression of a processed form of human homolog SUPV3L1 carrying an N-terminal deletion of 46 amino acids rescues yeast suv3 null mutant	SUV3	84.3414		83	50	80	Matrix/IM
YMR098C	Q03153	Mitochondrial protein required for the stability of Oli1p (Atp9p) mRNA;also required for the Oli1p ring formation;YMR098C is not an essential gene	ATP25	70.4326		82	116	143	Matrix/IM
YDL003W	Q12158	Essential alpha-kleisin subunit of the cohesin complex;required for sister chromatid cohesion in mitosis and meiosis;apoptosis induces cleavage and translocation of a C-terminal fragment to mitochondria;expression peaks in S phase	MCD1	63.2485		81	139	39
YPR021C	Q12482	Mitochondrial amino acid transporter;acts both as a glutamate uniporter and as an aspartate-glutamate exchanger;involved in nitrogen metabolism and nitrogen compound biosynthesis;human homolog SLC25A13 complements yeast null mutant	AGC1	104.308		77	88	117	IMS/IM
YDR058C	P54857	Triacylglycerol lipase that is localized to the mitochondria;has lipolytic activity towards triacylglycerols and diacylglycerols when expressed in E. coli	TGL2	37.5056		76	88	118	IMS/IM
YKL051W	P35735	Plasma membrane protein that may act to generate normal levels of PI4P;may act together with or upstream of Stt4p;at least partially mediates proper localization of Stt4p to the plasma membrane	SFK1	40.4619		74	50	50
YPR011C	Q12251	Mitochondrial transporter;major substrates are adenosine 5'-phosphosulfate (APS) and 3'-phospho-adenosine 5'-phosphosulfate (PAPS);member of the mitochondrial carrier family;the authentic, non-tagged protein is detected in highly purified mitochondria in high-throughput studies		35.9267		72	74	90	IMS/IM
YLR164W	Q06236	Putative alternate subunit of succinate dehydrogenase (SDH);mitochondrial inner membrane protein;genetic interaction with SDH4 suggests that Shh4p can function as a functional SDH subunit;a fraction copurifies with SDH subunit Sdh3p;expression induced by nitrogen limitation in a GLN3, GAT1-dependent manner;Shh4p has greater similarity to human SDHD (subunit D of SDH, implicated in paraganglioma) …	SHH4	18.639		69	34	1038
YFL036W	P13433	Mitochondrial RNA polymerase;single subunit enzyme similar to those of T3 and T7 bacteriophages;requires a specificity subunit encoded by MTF1 for promoter recognition;Mtf1p interacts with and stabilizes the Rpo41p-promoter complex, enhancing DNA bending and melting to facilitate pre-initiation open complex formation;Rpo41p also synthesizes RNA primers for mitochondrial DNA replication	RPO41	153.065		68	72	32	Matrix/IM
YMR177W	Q03218	Putative metal transporter involved in mitochondrial iron accumulation;MMT1 has a paralog, MMT2, that arose from the whole genome duplication	MMT1	56.2049		68	45	57	Matrix/IM
YLR190W	Q06324	Phosphorylated protein of the mitochondrial outer membrane;localizes only to mitochondria of the bud;interacts with Myo2p to mediate mitochondrial distribution to buds;mRNA is targeted to the bud via the transport system involving She2p	MMR1	54.8184		67	42	33	OM
YMR293C	Q03557	Subunit of the trimeric GatFAB AmidoTransferase(AdT) complex;involved in the formation of Q-tRNAQ;required for remodeling of ER caused by Hmg2p overexpression;similar to bacterial GatA glutamyl-tRNA amidotransferase	HER2	50.9251		67	111	168
YLR139C	P42900	Mitochondrial membrane protein;coordinates expression of mitochondrially-encoded genes;may facilitate delivery of mRNA to membrane-bound translation machinery	SLS1	73.2702		66	87	127	Matrix/IM
YDL142C	Q07560	Cardiolipin synthase;produces cardiolipin, which is a phospholipid of the mitochondrial inner membrane that is required for normal mitochondrial membrane potential and function and for correct integration of membrane-multispanning proteins into the mitochondrial outer membrane;required to maintain tubular mitochondrial morphology and functions in mitochondrial fusion;also required for normal vacu…	CRD1	32.035		64	69	85	IMS/IM
YMR150C	P28627	Catalytic subunit of mitochondrial inner membrane peptidase complex;required for maturation of mitochondrial proteins of the intermembrane space;complex contains two catalytic subunits (Imp1p and Imp2p that differ in substrate specificty) and Som1p	IMP1	21.4329		63	242	410
YMR097C	Q03151	Putative GTPase peripheral to the mitochondrial inner membrane;essential for respiratory competence, likely functions in assembly of the large ribosomal subunit, has homologs in plants and animals	MTG1	42.1591		62	47	75	Matrix/IM
YOR305W	Q08774	Protein of unknown function;green fluorescent protein (GFP)-fusion protein localizes to the mitochondrion;deletion confers sensitivity to 4-(N-(S-glutathionylacetyl)amino) phenylarsenoxide (GSAO);YOR305W is not an essential gene	RRG7	27.9799		62	125	132
YDL183C	P48569	Protein that may form an active mitochondrial KHE system;mitochondrial inner-membrane protein;non-essential gene;KHE system stands for K+/H+ exchanger system		37.0677		61	157	173	Matrix/IM
YBL013W	P32785	Methionyl-tRNA formyltransferase;catalyzes the formylation of initiator Met-tRNA in mitochondria;potential Cdc28p substrate	FMT1	44.6355		60	107	138	Matrix/IM
YBR060C	P32833	Subunit of the origin recognition complex (ORC);ORC directs DNA replication by binding to replication origins and is also involved in transcriptional silencing;interacts with Spp1p and with trimethylated histone H3;phosphorylated by Cdc28p	ORC2	71.2602		60	45	56
YDR538W	P33751	Phenylacrylic acid decarboxylase;confers resistance to cinnamic acid, decarboxylates aromatic carboxylic acids to the corresponding vinyl derivatives;also has mRNA binding activity;homolog of E. coli UbiX;co-overproduction of Pad1p and Fdc1p greatly increases cinnamic acid decarboxylase activity	PAD1	26.7437		57	4	206
YNL106C	P50942	Polyphosphatidylinositol phosphatase;dephosphorylates a number of phosphatidylinositol phosphates (PtdInsPs, PIPs) to PI;involved in endocytosis;hyperosmotic stress causes translocation to actin patches;synaptojanin-like protein with a Sac1 domain;INP52 has a paralog, INP53, that arose from the whole genome duplication	INP52	133.347		57	49	50
YJL126W	P47016	Nit protein;one of two proteins in S. cerevisiae with similarity to the Nit domain of NitFhit from fly and worm and to the mouse and human Nit protein which interacts with the Fhit tumor suppressor;nitrilase superfamily member	NIT2	34.6902		55	43	127
YOR205C	Q08622	Protein required for mitochondrial ribosome small subunit biogenesis;null mutant is defective in respiration and in maturation of 15S rRNA;protein is localized to the mitochondrial inner membrane;null mutant interacts synthetically with prohibitin (Phb1p)	GEP3	63.8783		55	64	122	Matrix/IM
YLR239C	Q06005	Lipoyl ligase;involved in the modification of mitochondrial enzymes by the attachment of lipoic acid groups	LIP2	37.2499		53	67	77	Matrix/IM
YOR017W	P32606	Protein with a role in 5'-end processing of mitochondrial RNAs;located in the mitochondrial membrane	PET127	93.4339		51	56	72	Matrix/IM
YOR022C	Q12204	DDHD domain-containing phospholipase;hydrolyzes cardiolipin, phosphatidylethanolamine, and phosphatidylglycerol;implicated in remodeling of mitochondrial phospholipids;antagonistically regulated by Aft1p and Aft2p transcription factors;in humans, mutations in DDHD1 and DDHD2 genes cause specific types of hereditary spastic paraplegia, while DDL1-defective yeast have similar phenotypes such as mit…	DDL1	81.769		50	44	90	Matrix/IM
YAR008W	P39707	Subunit of the tRNA splicing endonuclease;tRNA splicing endonuclease (Sen complex) is composed of Sen2p, Sen15p, Sen34p, and Sen54p;Sen complex also cleaves the CBP1 mRNA at the mitochondrial surface;Sen34p contains the active site for tRNA 3' splice site cleavage and has similarity to Sen2p and to Archaeal tRNA splicing endonuclease	SEN34	31.3133		49	10	6	IMS/IM
YNL125C	P53918	Protein with similarity to monocarboxylate permeases;appears not to be involved in transport of monocarboxylates such as lactate, pyruvate or acetate across the plasma membrane	ESBP6	73.8095		49	43	48
YOR081C	Q12043	Bifunctional triacylglycerol lipase and LPA acyltransferase;lipid particle-localized triacylglycerol (TAG) lipase involved in triacylglycerol mobilization;catalyzes acylation of lysophosphatidic acid (LPA);potential Cdc28p substrate;TGL5 has a paralog, TGL4, that arose from the whole genome duplication	TGL5	84.7309		48	14	26
YPR048W	Q12181	Conserved NAPDH-dependent diflavin reductase;component of an early step in the cytosolic Fe-S protein assembly (CIA) machinery;transfers electrons from NADPH to the Fe-S cluster of Dre2p;plays a pro-death role under oxidative stress;Tah18p-dependent nitric oxide synthesis confers high-temperature stress tolerance;possible target for development of antifungal drugs	TAH18	72.3367		43	26	27
YGR101W	P53259	Mitochondrial serine protease;required for the processing of various mitochondrial proteins and maintenance of mitochondrial DNA and morphology;belongs to the rhomboid-GlpG superfamily of intramembrane peptidases	PCP1	38.8399		42	64	61	Matrix/IM
YEL006W	P39953	Putative mitochondrial NAD+ transporter;member of the mitochondrial carrier subfamily (see also YIA6);has putative human ortholog;YEA6 has a paralog, YIA6, that arose from the whole genome duplication	YEA6	36.9772		41	36	35	IMS/IM
YGR169C	P53294	tRNA:pseudouridine synthase;catalyzes the conversion of uridine to pseudouridine at position 31 in cytoplasmic and mitochondrial tRNAs;mutation of Asp168 to Ala abolishes enzyme activity;not essential for viability	PUS6	46.8214		41	44	47
YER153C	P10355	Mitochondrial translational activator specific for the COX3 mRNA;acts together with Pet54p and Pet494p;located in the mitochondrial inner membrane	PET122	29.1626		40	59	123	Matrix/IM
YPR134W	P08593	Nuclear encoded protein needed for splicing of mitochondrial intron;required for efficient splicing of mitochondrial COX1 aI5beta intron;mss18 mutations block cleavage of 5' exon - intron junction;phenotype of intronless strain suggests additional functions	MSS18	30.9503		39	46	90	Matrix/IM
YGR102C	P53260	Subunit of the trimeric GatFAB AmidoTransferase(AdT) complex;involved in the formation of Q-tRNAQ;transposon insertion mutant is salt sensitive and null mutant has growth defects;non-tagged protein is detected in purified mitochondria	GTF1	20.7973		38	50	82
YMR282C	P22136	Mitochondrial protein;likely involved in translation of the mitochondrial OLI1 mRNA;exhibits genetic interaction with the OLI1 mRNA 5'-untranslated leader	AEP2	67.5544		36	67	146	Matrix/IM
YPL069C	Q12051	Geranylgeranyl diphosphate synthase (GGPS);increases the intracellular pool of geranylgeranyl diphosphate, suppressor of bet2 mutation that causes defective geranylgeranylation of small GTP-binding proteins that mediate vesicular traffic	BTS1	38.6417		35	21	32
YPL109C	Q02981	UbiB family protein;contains transmembrane domain and mitochondrial targeting sequence;the authentic, non-tagged protein is detected in highly purified mitochondria in high-throughput studies	MCO76	76.1831		35	38	100	IMS/IM
YLR091W	Q12393	Protein of unknown function;required for mitochondrial genome maintenance;detected in highly purified mitochondria in high-throughput studies;null mutant has decreased levels of cardiolipin and phosphatidylethanolamine	GEP5	33.8772		34	20	53	Matrix/IM
YDR349C	Q06325	Putative GPI-anchored aspartic protease;member of the yapsin family of proteases involved in cell wall growth and maintenance;located in the cytoplasm and endoplasmic reticulum	YPS7	64.4837		31	21	24	OM
YLL007C	Q07799	Homolog of mammalian ELMO (Engulfment and celL MOtility);upstream component for regulation through the small GTPase Rho5p;may form a complex with Dck1p that acts as a GEF for Rho5p;cytoplasmic protein that relocates to mitochondria under oxidative stress;implicated in mitophagy;not an essential protein	LMO1	76.6126		31	37	30
YDR326C	Q06681	Sterol-binding protein;has a probable role in retrograde transport of sterols from the plasma membrane to the ER;contains two StART-like domains that bind sterols and a GRAM domain;co-localizes to puncta in the cortical ER with Sip3p;one of six StART-like domain-containing proteins in yeast that may be involved in sterol transfer between intracellular membranes;conserved across eukaryotes	YSP2	160.577		30	19	15
YGR150C	P48237	Mitochondrial 15S rRNA-binding protein;required for intron removal of COB and COX1 pre-mRNAs;has separable roles in stabilizing mitochondrial 15S rRNA and in maturation of the COB and COX1 mRNAs;contains pentatricopeptide repeat (PPR) motifs;mutant is respiratory deficient and has defective plasma membrane electron transport	CCM1	101.434		30	41	46	Matrix/IM
YMR066W	Q04748	Mitochondrial protein of unknown function	SOV1	104.759		29	17	15	Matrix/IM
YAL015C	P31378	DNA N-glycosylase and apurinic/apyrimidinic (AP) lyase;involved in base excision repair;acts in both nucleus and mitochondrion;creates a double-strand break at mtDNA origins that stimulates replication in response to oxidative stress;required for maintaining mitochondrial genome integrity;NTG1 has a paralog, NTG2, that arose from the whole genome duplication	NTG1	45.5794		27	19	17
YGR110W	P53264	Mitochondrial cardiolipin-specific phospholipase;functions upstream of Taz1p to generate monolyso-cardiolipin;transcription increases upon genotoxic stress;involved in restricting Ty1 transposition;has homology to mammalian CGI-58	CLD1	52.0633		26	45	64	Matrix/IM
YLR132C	Q12208	Putative poly(U)-specific 3'-to-5' RNA exonuclease;involved in 3'-end processing of U6 snRNA removing uridines and generating a terminal 2&#8242;,3&#8242;cyclic phosphate;essential protein that localizes to the nucleus and mitochondria;overexpression suppresses the respiratory defects of oxa1 and mtf2 mutants;homolog of S.pombe gene, mpn1 and human gene, hUSB1;mutations in hUSB1 are associated wi…	USB1	33.6927		26	22	21
YFR019W	P34756	1-phosphatidylinositol-3-phosphate 5-kinase;vacuolar membrane kinase that generates phosphatidylinositol (3,5)P2, which is involved in vacuolar sorting and homeostasis	FAB1	257.44		25	18	21
YGR096W	P53257	Mitochondrial membrane transporter;mediates uptake of the essential cofactor thiamine pyrophosphate (ThPP) into mitochondria;expression appears to be regulated by carbon source;member of the mitochondrial carrier family	TPC1	35.1543		24	24	34	IMS/IM
YLR422W	Q06409	Dock family protein (Dedicator Of CytoKinesis), homolog of human DOCK1;upstream component for regulation through the small GTPase Rho5p;may form a complex with Lmo1p that acts as a GEF for Rho5p;interacts with Ino4p;cytoplasmic protein that relocates to mitochondria under oxidative stress;implicated in mitophagy;not an essential protein;DOCK proteins act as guanine nucleotide exchange factors	DCK1	221.569		24	16	21
YKL011C	Q03702	Mitochondrial cruciform cutting endonuclease;cleaves Holliday junctions formed during recombination of mitochondrial DNA;CCE1 has a paralog, MRS1, that arose from the whole genome duplication	CCE1	41.0161		22	27	38
YDL033C	Q12093	tRNA-specific 2-thiouridylase;responsible for 2-thiolation of the wobble base of mitochondrial tRNAs;human homolog TRMU is implicated in myoclonus epilepsy associated with ragged red fibers (MERRF), and can complement yeast null mutant	SLM3	47.0548		21	29	36
YHR091C	P38714	Mitochondrial arginyl-tRNA synthetase;mutations in human ortholog are associated with pontocerebellar hypoplasia type 6;MSR1 has a paralog, YDR341C, that arose from the whole genome duplication	MSR1	73.715		20	27	46	Matrix/IM
YIL114C	P40478	Putative mitochondrial porin (voltage-dependent anion channel);not required for mitochondrial membrane permeability or mitochondrial osmotic stability;POR2 has a paralog, POR1, that arose from the whole genome duplication	POR2	31.1886		20	7	16
YHR075C	P38796	Protein with carboxyl methyl esterase activity;may have a role in demethylation of the phosphoprotein phosphatase catalytic subunit;also identified as a small subunit mitochondrial ribosomal protein	PPE1	44.8863		19	15	33
YCR008W	P25333	Ser/Thr protein kinase involved in salt tolerance;funtions in regulation of Trk1p-Trk2p potassium transporter;overexpression affects the Fe-S and lipoamide containing proteins in the mitochondrion;required for lipoylation of Lat1p, Kgd2p and Gcv3p;partially redundant with Hal5p;has similarity to Npr1p;localizes to the cytoplasm and mitochondrion	SAT4	66.6909		18	12	11
YDL036C	Q12069	Mitochondrial tRNA:pseudouridine synthase;catalyzes the formation of pseudouridine at position 32 in mitochondrial tRNAs;contains an N-terminal mitochondrial targeting sequence;PUS9 has a paralog, RIB2, that arose from the whole genome duplication	PUS9	53.4116		18	21	72
YOR093C	Q12275	Putative protein of unknown function;deletion causes sensitivity to unfolded protein response-inducing agents	CMR2	186.931		18	25	25	OM
Q0065	P03878	Endonuclease I-SceII;encoded by a mobile group I intron within the mitochondrial COX1 gene;intron is normally spliced by the BI4p maturase but AI4p can mutate to acquire the same maturase activity	AI4	63.3362		17	23	37	Matrix/IM
YER077C	P40050	Protein that associates with mitochondrial ribosome;green fluorescent protein (GFP)-fusion protein localizes to the mitochondrion;null mutation results in a decrease in plasma membrane electron transport	MRX1	79.5806		16	17	19	Matrix/IM
YHR168W	P38860	Putative GTPase;member of the Obg family;peripheral protein of the mitochondrial inner membrane that associates with the large ribosomal subunit;required for mitochondrial translation, possibly via a role in ribosome assembly	MTG2	57.8589		15	17	17
YDR219C	Q04922	Mitochondria-associated F-box protein;involved in maintenance of normal mitochondrial morphology;interacts with Skp1p through the F-box motif;preferentially localizes to the mother cell during budding	MFB1	53.1748		14	7	11
YMR287C	P39112	3'-5' exoribonuclease;component of the mitochondrial degradosome along with the ATP-dependent RNA helicase Suv3p;the degradosome associates with the ribosome and mediates turnover of aberrant or unprocessed RNAs	DSS1	110.844		14	22	21
YDR514C	Q04408	Protein of unknown function that localizes to mitochondria;overexpression affects endocytic protein trafficking;YDR514C has a paralog, GFD2, that arose from the whole genome duplication		55.5016		11	11	10
YGL136C	P53123	Mitochondrial 2' O-ribose methyltransferase;required for methylation of U(2791) in 21S rRNA;MRM2 deletion confers thermosensitive respiration and loss of mitochondrial DNA;has similarity to Spb1p and Trm7p, and to E. coli FtsJ/RrmJ	MRM2	37.43		6	8	10	Matrix/IM
YGR053C	P53234	Putative protein of unknown function	MCO32	32.2117		3	5	10	Matrix/IM
YOR350C	P24720	Protein involved in splicing Group I aI5-beta intron from COX1 mRNA;mitochondrial matrix protein	MNE1	77.2407		3	5	6	Matrix/IM
YPL148C	Q12036	Phosphopantetheine:protein transferase (PPTase);activates mitochondrial acyl carrier protein (Acp1p) by phosphopantetheinylation	PPT2	19.9774		0	0	0
Q0055	P03876	Reverse transcriptase required for splicing of the COX1 pre-mRNA;encoded by a mobile group II intron within the mitochondrial COX1 gene	AI2	98.0652					Matrix/IM
Q0060	P03877	Endonuclease I-SceIII;encoded by a mobile group I intron within the mitochondrial COX1 gene	AI3	47.9369
Q0070	Q9ZZX1	Endonuclease I-SceIV;involved in intron mobility;encoded by a mobile group I intron within the mitochondrial COX1 gene	AI5_ALPHA	72.1916
Q0075	Q9ZZX0	Protein of unknown function;encoded within an intron of the mitochondrial COX1 gene;translational initiation codon is predicted to be ATA rather than ATG	AI5_BETA	42.2979
Q0080	P00856	Subunit 8 of the F0 sector of mitochondrial F1F0 ATP synthase;encoded on the mitochondrial genome;ATP8 and ATP6 mRNAs are not translated in the absence of the F1 sector of ATPase	ATP8	5.8253
Q0105	P00163	Cytochrome b;mitochondrially encoded subunit of the ubiquinol-cytochrome c reductase complex which includes Cobp, Rip1p, Cyt1p, Cor1p, Qcr2p, Qcr6p, Qcr7p, Qcr8p, Qcr9p, and Qcr10p	COB	43.6612
Q0110	P03873	Mitochondrial mRNA maturase with a role in splicing;encoded by both exon and intron sequences of partially processed COB mRNA	BI2	49.3532					Matrix/IM
Q0115	Q9ZZW7	Mitochondrial mRNA maturase;forms a complex with Mrs1p to mediate splicing of the bI3 intron of the COB gene;encoded by both exon and intron sequences of partially processed COB mRNA	BI3	61.2031					Matrix/IM
Q0130	P61829	F0-ATP synthase subunit c (ATPase-associated proteolipid);encoded on the mitochondrial genome;mutation confers oligomycin resistance;expression is specifically dependent on the nuclear genes AEP1 and AEP2	OLI1	7.7605					Matrix/IM
Q0160	P03882	I-SceI DNA endonuclease;encoded by the mitochondrial group I intron of the 21S_rRNA gene;mediates gene conversion that propagates the intron into intron-less copies of the 21S_rRNA gene	SCEI	27.6936					Matrix/IM
Q0255	P03881	Maturase-like protein		56.4454
Q0275	P00420	Subunit III of cytochrome c oxidase (Complex IV);Complex IV is the terminal member of the mitochondrial inner membrane electron transport chain;one of three mitochondrially-encoded subunits	COX3	30.3569					Matrix/IM
YBL039W-B	P0C268	Putative protein of unknown function;mCherry fusion protein localizes to the vacuole	MIN6	6.8782					OM
YBR047W	P38231	Putative protein of unknown function;proposed to be involved in iron or copper homeostasis;the authentic, non-tagged protein is detected in highly purified mitochondria in high-throughput studies	FMP23	20.5128					Matrix/IM
YBR085W	P18238	Mitochondrial inner membrane ADP/ATP translocator;exchanges cytosolic ADP for mitochondrially synthesized ATP;expressed under anaerobic conditions;similar to Aac1p;has roles in maintenance of viability and in respiration;AAC3 has a paralog, PET9, that arose from the whole genome duplication	AAC3	33.3334					IMS/IM
YBR163W	P38289	Mitochondrial 5'-3' exonuclease and sliding exonuclease;required for mitochondrial genome maintenance;distantly related to the RecB nuclease domain of bacterial RecBCD recombinases;may be regulated by the transcription factor Ace2	EXO5	67.5673					Matrix/IM
YBR201C-A	Q2V2Q3	Putative protein of unknown function	MIN7	7.7251
YBR230W-A	Q3E762	Putative protein of unknown function;YBR230W-A has a paralog, COQ8, that arose from the whole genome duplication	COQ21	7.6219					Matrix/IM
YCL004W	P25578	Phosphatidylglycerolphosphate synthase;catalyzes the synthesis of phosphatidylglycerolphosphate from CDP-diacylglycerol and sn-glycerol 3-phosphate in the first committed and rate-limiting step of cardiolipin biosynthesis	PGS1	59.398					Matrix/IM
YCL064C	P25379	Catabolic L-serine (L-threonine) deaminase;catalyzes the degradation of both L-serine and L-threonine;required to use serine or threonine as the sole nitrogen source, transcriptionally induced by serine and threonine	CHA1	39.3099					Matrix/IM
YDL069C	P14066	Mitochondrial translational activator of the COB mRNA;membrane protein that interacts with translating ribosomes, acts on the COB mRNA 5'-untranslated leader	CBS1	26.6026					Matrix/IM
YDL107W	P40990	Peripherally bound inner membrane protein of the mitochondrial matrix;involved in membrane insertion of C-terminus of Cox2p, interacts genetically and physically with Cox18p	MSS2	41.4867					Matrix/IM
YDL149W	Q12142	Transmembrane protein involved in forming Cvt and autophagic vesicles;cycles between the phagophore assembly site (PAS) and other cytosolic punctate structures, not found in autophagosomes;may be involved in membrane delivery to the PAS	ATG9	115.383
YDR065W	Q12167	Protein of unknown function;required for vacuolar acidification and mitochondrial genome maintenance;the authentic, non-tagged protein is detected in highly purified mitochondria in high-throughput studies	RRG1	42.8649					Matrix/IM
YDR077W	Q01589	Major stress-induced structural GPI-cell wall glycoprotein;associates with translating ribosomes, possible role in mitochondrial genome maintenance;ORF contains two distinct variable minisatellites;SED1 has a paralog, SPI1, that arose from the whole genome duplication	SED1	34.4095
YDR125C	Q04623	Protein of unknown function;ECM18 has a paralog, ICT1, that arose from the whole genome duplication	ECM18	53.2074					Matrix/IM
YDR185C	Q04006	Mitochondrial protein of unknown function;similar to Ups1p and Ups2p which are involved in regulation of mitochondrial cardiolipin and phosphatidylethanolamine levels;null is viable but interacts synthetically with ups1 and ups2 mutations;UPS3 has a paralog, UPS2, that arose from the whole genome duplication	UPS3	20.9294					IMS/IM
YDR191W	P53688	NAD(+)-dependent protein deacetylase;deacetylation targets are primarily mitochondrial proteins;involved along with Hst3p in silencing at telomeres, cell cycle progression, radiation resistance, genomic stability and short-chain fatty acid metabolism;accumulates in mitochondria in response to biotin starvation and may link biotin metabolism with energy homeostasis;member of the Sir2 family and ma…	HST4	41.78
YDR197W	P14905	Mitochondrial translational activator of the COB mRNA;interacts with translating ribosomes, acts on the COB mRNA 5'-untranslated leader	CBS2	44.6252					Matrix/IM
YDR263C	Q12086	Mitochondrial nuclease functioning in DNA repair and replication;modulates the stability of the mitochondrial genome, induced by exposure to mutagens, also induced during meiosis at a time nearly coincident with commitment to recombination;DIN7 has a paralog, EXO1, that arose from the whole genome duplication	DIN7	49.0541
YDR282C	Q05648	Mitochondrial inner membrane protein of unknown function;associates with mitochondrial ribosome;localizes to the inner membrane with the C terminus facing the intermembrane space;ortholog of human RMND1, mutation in which is implicated in infantile encephaloneuromyopathy and defective mitochondrial translation	MRX10	47.1691					IMS/IM
YDR332W	Q06683	Double-stranded DNA-dependent helicase of the DExH/D-box family;required for maintenance of the mitochondrial (mt) genome;null mutant accumulates double-stranded breaks in mt DNA;localizes to the mt matrix	IRC3	78.5614					Matrix/IM
YDR336W	Q05473	Protein that associates with mitochondrial ribosome;sumoylated under stress conditions in a genome wide study;YDR336W is not an essential gene	MRX8	35.635
YDR350C	P50273	Specific translational activator for the mitochondrial ATP6 mRNA;Atp6p encodes a subunit of F1F0 ATP synthase;localized to the mitochondrial inner membrane	ATP22	79.7805					Matrix/IM
YDR419W	Q04049	DNA polymerase eta;involved in translesion synthesis during post-replication repair;catalyzes the synthesis of DNA opposite cyclobutane pyrimidine dimers and other lesions;involved in formation of post-replicative damage-induced genome-wide cohesion;may also have a role in protection against mitochondrial mutagenesis;mutations in human pol eta are responsible for XPV	RAD30	71.5238
YDR438W	Q04083	Mitochondrial transporter repressible by thiamine;THI74 has a paralog, YML018C, that arose from the whole genome duplication;shows sequence homology to human gene SLC35F3, a thiamine transporter implicated in hypertension	THI74	41.3808
YEL030W	P39987	Heat shock protein of the Hsp70 family;localized in mitochondrial nucleoids, plays a role in protein translocation, interacts with Mge1p in an ATP-dependent manner;overexpression induces extensive mitochondrial DNA aggregations;ECM10 has a paralog, SSC1, that arose from the whole genome duplication	ECM10	70.0802
YER093C-A	P87275	Protein of unknown function;null mutant is viable but shows increased loss of mitochondrial genome and synthetic interaction with prohibitin (phb1);contains an intron;SWAT-GFP and mCherry fusion proteins localize to the mitochondria;YER093C-A has a paralog, YBL059W, that arose from the whole genome duplication	AIM11	15.7595					IMS/IM
YER170W	P26364	Mitochondrial adenylate kinase;catalyzes the reversible synthesis of GTP and AMP from GDP and ADP;may serve as a back-up for synthesizing GTP or ADP depending on metabolic conditions;3' sequence of ADK2 varies with strain background	ADK2	25.1972
YFR032C-B	Q8TGU2	Putative protein of unknown function;identified by gene-trapping, microarray-based expression analysis, and genome-wide homology searching	MIN10	9.9575
YGL063W	P53167	Mitochondrial tRNA:pseudouridine synthase;acts at positions 27 and 28, but not at position 72;efficiently and rapidly targeted to mitochondria, specifically dedicated to mitochondrial tRNA modification;mutation also affects pseudouridylation of some nuclear-encoded mRNAs;PUS2 has a paralog, PUS1, that arose from the whole genome duplication	PUS2	41.9009					Matrix/IM
YGL085W	P53153	Putative protein of unknown function;mutant has long chronological lifespan;has homology to Staphylococcus aureus nuclease;GFP-fusion protein localizes to mitochondria;is induced in response to the DNA-damaging agent MMS	LCL3	32.1355					Matrix/IM
YGL209W	P53035	Zinc finger transcriptional repressor;cooperates with Mig1p in glucose-induced gene repression;under low glucose conditions relocalizes to mitochondrion, where it interacts with Ups1p, antagonizes mitochondrial fission factor Dnm1p, indicative of a role in mitochondrial fusion or regulating morphology;regulates filamentous growth in response to glucose depletion;activated in stochastic pulses of …	MIG2	42.0629
YGL219C	P53083	Mitochondrial component of the ERMES complex;links the ER to mitochondria and may promote inter-organellar calcium and phospholipid exchange as well as coordinating mitochondrial DNA replication and growth;required for mitophagy;ERMES complex is often co-localized with peroxisomes and with concentrated areas of pyruvate dehydrogenase	MDM34	52.001
YGR015C	P53208	Putative protein of unknown function;green fluorescent protein (GFP)-fusion protein localizes to the mitochondrion		37.9423
YGR046W	P53230	Mitochondrial phosphatidate cytidylyltransferase (CDP-DAG synthase);required for cardiolipin biosynthesis;viability of null mutant is strain-dependent;mRNA is targeted to the bud;mutant displays defect in mitochondrial protein import, likely due to altered membrane lipid composition	TAM41	44.2202					Matrix/IM
YGR062C	P53239	Protein required for membrane insertion of C-terminus of Cox2p;mitochondrial integral inner membrane protein;interacts genetically and physically with Mss2p and Pnt1p;similar to S. cerevisiae Oxa1, N. crassa Oxa2p, and E. coli YidC;respiratory defect of the null mutant is functionally complemented by human COX18 carrying the N-terminal 54 amino acids of S. cerevisiae Cox18p	COX18	35.6767					Matrix/IM
YGR230W	P50084	Protein of unknown function;overexpression bypasses need for Spo12p, but not required for meiosis;BNS1 has a paralog, SPO12, that arose from the whole genome duplication	BNS1	15.8596					Matrix/IM
YHL012W	P38709	Putative UTP glucose-1-phosphate uridylyltransferase;YHL012W has a paralog, UGP1, that arose from the whole genome duplication		55.9856
YHR002W	P38702	Mitochondrial carrier protein;involved in the accumulation of CoA in the mitochondrial matrix;homolog of human Graves disease protein SLC25A16, which complements yeast null mutant;does not encode an isozyme of Leu4p, as first hypothesized	LEU5	40.8428					IMS/IM
YHR120W	P25846	DNA-binding protein of the mitochondria;involved in repair of mitochondrial DNA;has ATPase activity and binds to DNA mismatches;has homology to E. coli MutS;transcription is induced during meiosis	MSH1	109.425					IMS/IM
YHR155W	P38851	Putative sterol transfer protein;localizes to puncta in the cortical ER;probable role in retrograde transport of sterols from the plasma membrane to the ER;one of six StART-like domain-containing proteins in yeast that may be involved in sterol transfer between intracellular membranes;conserved across eukaryotes;contains GRAM, StART-like (VASt) and two PH-like domains	LAM1	143.593
YHR189W	P38876	One of two mitochondrially-localized peptidyl-tRNA hydrolases;dispensable for respiratory growth on rich medium, but required for respiratory growth on minimal medium;see also PTH2	PTH1	21.0486					Matrix/IM
YHR194W	P38880	Mitochondrial protein that may have a role in phospholipid metabolism;inner membrane protein with similarity to Mdm32p;required for normal mitochondrial morphology and inheritance;interacts genetically with MMM1, MMM2, MDM10, MDM12, and MDM34	MDM31	66.7152
YIL006W	P40556	Mitochondrial NAD+ transporter;involved in the transport of NAD+ into the mitochondria (see also YEA6);member of the mitochondrial carrier subfamily;disputed role as a pyruvate transporter;has putative mouse and human orthologs;YIA6 has a paralog, YEA6, that arose from the whole genome duplication	YIA6	41.9598					IMS/IM
YIL060W	P40519	Mitochondrial protein of unknown function;required for respiratory growth;mutant accumulates less glycogen than does wild type;null mutation results in a decrease in plasma membrane electron transport;YIL060W is not an essential gene		15.6809
YIL134W	P40464	Mitochondrial flavin adenine dinucleotide transporter;FAD is a synthesis product of riboflavin;human homolog SLC25A32 is implicated in multiple acyl-CoA dehydrogenase deficiency (MADD) or glutaric aciduria type II (GAII), and can complement yeast null mutant	FLX1	34.4277					IMS/IM
YIL139C	P38927	Accessory subunit of DNA polymerase zeta;involved in translesion synthesis during post-replication repair;required for mutagenesis induced by DNA damage;involved in double-strand break repair;forms a complex with Rev3p, Pol31p and Pol32p	REV7	28.7448
YIL146C	P40458	Mitochondrial outer membrane protein required to initiate mitophagy;recruits the autophagy adaptor protein Atg11p and the ubiquitin-like protein Atg8p to the mitochondrial surface to initiate mitophagy, the selective vacuolar degradation of mitochondria in response to starvation;can promote pexophagy when placed ectopically in the peroxisomal membrane;regulates mitophagy and ethanol production du…	ATG32	58.9675					IMS/IM
YJL003W	P47081	Mitochondrial inner membrane protein;required for assembly of cytochrome c oxidase	COX16	14.0802					IMS/IM
YJL023C	P47065	Protein required for respiratory growth;the authentic, non-tagged protein is detected in highly purified mitochondria in high-throughput studies	PET130	39.8353					Matrix/IM
YJL043W	P47053	Putative protein of unknown function;YJL043W is a non-essential gene		29.2286
YJL127C-B	Q3E828	Putative protein of unknown function;identified based on homology to the filamentous fungus, <i>Ashbya gossypii</i>;SWAT-GFP and seamless-GFP fusion proteins localize to the mitochondria	MCO6	6.0211					OM
YJL147C	P47007	Protein that associates with mitochondrial ribosome;homozygous diploid deletion strain has a sporulation defect characterized by elevated dityrosine in the soluble fraction;expression induced by calcium shortage;YJL147W is a non-essential gene	MRX5	44.8723					Matrix/IM
YJL209W	P07252	Mitochondrial protein, regulator of COB mRNA stability and translation;interacts with the 5'-untranslated region of the COB mRNA;found in a complex at the inner membrane along with Pet309p;localizes to mitochondrial foci upon DNA replication stress	CBP1	76.2077					Matrix/IM
YJR039W	P47107	Putative protein of unknown function;the authentic, non-tagged protein is detected in highly purified mitochondria in high-throughput studies	MLO127	127.425
YKL023C-A	Q2V2P3	Putative protein of unknown function	MIN9	8.5291					Matrix/IM
YKL037W	P32858	Protein of unknown function;null mutant is viable and displays elevated frequency of mitochondrial genome loss;null mutation confers sensitivity to tunicamycin and DTT	AIM26	12.9446
YKL044W	P36092	Protein of unknown function;SWAT-GFP, seamless-GFP and mCherry fusion proteins localize to the mitochondria;mRNA identified as translated by ribosome profiling data;MMO1 is a non-essential gene	MMO1	12.4591
YKL055C	P35731	Mitochondrial 3-oxoacyl-[acyl-carrier-protein] reductase;may comprise a type II mitochondrial fatty acid synthase along with Mct1p;human homolog CBR4 complements yeast null mutant	OAR1	31.1925					Matrix/IM
YKL084W	P36078	Zinc-binding mitochondrial intermembrane space (IMS) protein;involved in a disulfide relay system for IMS import of cysteine-containing proteins;binds Mia40p and stimulates its Erv1p-dependent oxidation, probably by sequestering zinc	HOT13	13.6379
YKL133C	P36066	Putative protein of unknown function;not required for growth of cells lacking the mitochondrial genome;SWAT-GFP and mCherry fusion proteins localize to the mitochondria;YKL133C has a paralog, MGR3, that arose from the whole genome duplication	RCI50	54.5005					IMS/IM
YKL162C	P36052	Putative protein of unknown function;green fluorescent protein (GFP)-fusion protein localizes to the mitochondrion		46.5118
YKL208W	P36038	Protein involved in 5' RNA end processing;substrates include mitochondrial COB, 15S_rRNA, and RPM1 transcripts;may also have a role in 3' end processing of the COB pre-mRNA;displays genetic interaction with cell cycle-regulated kinase Dbf2p	CBT1	31.1681					Matrix/IM
YLL027W	Q07821	Protein required for maturation of mitochondrial [4Fe-4S] proteins;functions in a complex with Isa2p and possibly Iba57p;isa1 deletion causes loss of mitochondrial DNA and respiratory deficiency;depletion reduces growth on nonfermentable carbon sources;functional ortholog of bacterial A-type ISC proteins;human ISCA1 can complement isa1 null mutant	ISA1	27.6985					Matrix/IM
YLL033W	Q07843	Protein of unknown function;YLL033W is not an essential gene but mutant is defective in spore formation;null mutant displays increased levels of spontaneous Rad52p foci	IRC19	27.3985					Matrix/IM
YLR049C	Q12110	Putative protein of unknown function	MLO50	49.4957
YLR067C	P32522	Specific translational activator for the COX1 mRNA;binds to the COX1 mRNA;also influences stability of intron-containing COX1 primary transcripts;localizes to the mitochondrial inner membrane;contains 12 pentatricopeptide repeats (PPRs)	PET309	112.68					Matrix/IM
YLR087C	Q12150	Protein required for fermentation at low temperature;plays a role in the maturation of secretory proteins;the authentic, non-tagged protein is detected in highly purified mitochondria in high-throughput studies	CSF1	338.196
YLR142W	P09368	Proline oxidase;nuclear-encoded mitochondrial protein involved in utilization of proline as sole nitrogen source;PUT1 transcription is induced by Put3p in the presence of proline and the absence of a preferred nitrogen source	PUT1	53.281					Matrix/IM
YLR154W-C	Q8TGM6	Protein potentially involved in regulation of respiratory metabolism;located in the mitochondria;interacts genetically with RPO41 and physically with Coq5p;encoded within the 25S rRNA gene on the opposite strand	TAR1	14.3544
YLR165C	Q06244	Pseudouridine synthase;catalyzes only the formation of pseudouridine (Psi)-2819 in mitochondrial 21S rRNA;not essential for viability	PUS5	29.3702					Matrix/IM
YLR168C	P35200	Mitochondrial intermembrane space protein;involved in phospholipid metabolism;forms complex with Mdm35p that transfers phosphatidylserine from outer membrane to inner membrane for phosphatidylethanolamine synthesis;null mutant has defects in mitochondrial morphology;similar to Ups1p, Ups3p and to human PRELI;UPS2 has a paralog, UPS3, that arose from the whole genome duplication	UPS2	26.5087
YLR193C	Q05776	Phosphatidic acid transfer protein;plays a role in phospholipid metabolism by transporting phosphatidic acid from the outer to the inner mitochondrial membrane;localizes to the mitochondrial intermembrane space;null mutant has altered cardiolipin and phosphatidic acid levels;ortholog of human PRELI	UPS1	20.1162					IMS/IM
YLR204W	P32344	Mitochondrial inner membrane protein;required for accumulation of spliced COX1 mRNA;may have an additional role in translation of COX1 mRNA	QRI5	12.7948
YLR251W	Q06563	Protein required for ethanol metabolism;induced by heat shock and localized to the inner mitochondrial membrane;homologous to mammalian peroxisomal membrane protein Mpv17;human homolog MPV17 is implicated in hepatocerebral mtDNA depletion syndromes (MDDS), and complements yeast null mutant	SYM1	22.9293
YLR256W	P0CE41	Zinc finger transcription factor;involved in the complex regulation of gene expression in response to levels of heme and oxygen;localizes to the mitochondrion as well as to the nucleus;the S288C sequence differs from other strain backgrounds due to a Ty1 insertion in the carboxy terminus	HAP1	166.107
YLR281C	Q05863	Putative protein of unknown function;green fluorescent protein (GFP)-fusion protein localizes to mitochondria;YLR281C is not an essential gene	RSO55	18.2145
YLR289W	P46943	Mitochondrial matrix GTPase;associates with mitochondrial ribosomes;important for translation under temperature and nutrient stress;may have a role in translational fidelity;similar to bacterial LepA elongation factor	GUF1	73.2043					Matrix/IM
YLR307C-A	Q3E825	Putative protein of unknown function	DPA10	9.6373
YLR346C	Q06139	Protein of unknown function found in mitochondria;expression is regulated by transcription factors involved in pleiotropic drug resistance, Pdr1p and Yrr1p;not an essential gene;YLR346C has a paralog, YGR035C, that arose from the whole genome duplication	CIS1	11.3522
YML007C-A	Q3E7A6	Putative protein of unknown function;green fluorescent protein (GFP)-fusion protein localizes to mitochondria	MIN4	4.4156
YML060W	P53397	Nuclear and mitochondrial glycosylase/lyase;specifically excises 7,8-dihydro-8-oxoguanine residues located opposite cytosine or thymine residues in DNA, repairs oxidative damage to mitochondrial DNA, contributes to UVA resistance	OGG1	42.7899
YML061C	P07271	DNA helicase, potent G-quadruplex DNA binder/unwinder;possesses strand annealing activity;promotes DNA synthesis during break-induced replication;important for crossover recombination;translation from different start sites produces mitochondrial and nuclear forms;nuclear form is a catalytic inhibitor of telomerase;mitochondrial form involved in DNA repair and recombination;mutations affect Zn, Fe…	PIF1	97.6972
YMR023C	P32559	Mitochondrial protein;forms a heterodimer complex with Mto1p that performs the 5-carboxymethylaminomethyl modification of the wobble uridine base in mitochondrial tRNAs;similar to human GTPBP3	MSS1	58.3533					Matrix/IM
YMR030W	Q05043	Protein required for respiratory growth;localized to both the nucleus and mitochondrion;may interact with transcription factors to mediate the transition to respiratory growth and activate transcription of nuclear and mitochondrial genes	RSF1	43.4626
YMR035W	P46972	Catalytic subunit of mitochondrial inner membrane peptidase complex;required for maturation of mitochondrial proteins of the intermembrane space;complex contains two catalytic subunits (Imp1p and Imp2p that differ in substrate specificity), and Som1p	IMP2	19.9414
YMR059W	Q04675	Subunit of the tRNA splicing endonuclease;tRNA splicing endonuclease (Sen complex) is composed of Sen2p, Sen15p, Sen34p, and Sen54p;Sen complex also cleaves the CBP1 mRNA at the mitochondrial surface	SEN15	14.8892					OM
YMR064W	P32493	Protein required for expression of the mitochondrial OLI1 gene;mitochondrial OLI1 gene encodes subunit 9 of F1-F0 ATP synthase	AEP1	59.7664					Matrix/IM
YMR118C	Q04487	Putative mitochondrial inner membrane protein of unknown function;although similar to paralogous Sdh3p, Shh3p is not a stoichiometric subunit of either succinate dehydrogenase or of the TIM22 translocase;SHH3 has a paralog, SDH3, that arose from the whole genome duplication	SHH3	22.3172
YMR166C	Q03829	Transporter of the mitochondrial inner membrane that exports magnesium;involved in mitochondrial Mg2+ homeostasis;has similarity to human mitochondrial ATP-Mg/Pi carriers	MME1	40.9999					IMS/IM
YMR182W-A	Q8TGS7	Putative protein of unknown function	MIN3	3.0939
YMR187C	Q03236	Putative protein of unknown function;YMR187C is not an essential gene		50.3054					IMS/IM
YMR207C	P32874	Mitochondrial acetyl-coenzyme A carboxylase;catalyzes production of malonyl-CoA in mitochondrial fatty acid biosynthesis;relocalizes from mitochondrion to cytoplasm upon DNA replication stress;genetic and comparative analysis suggests that translation begins at a non-canonical (Ile) start codon at -372 relative to the annotated start codon	HFA1	241.796					Matrix/IM
YMR252C	Q04814	Putative protein of unknown function;green fluorescent protein (GFP)-fusion protein localizes to mitochondria;YMR252C is not an essential gene	MLO1	15.6441
YMR257C	P08468	Mitochondrial translational activator specific for the COX2 mRNA;located in the mitochondrial inner membrane	PET111	94.5401					Matrix/IM
YNL083W	D6W196	ADP/ATP transporter;member of the Ca2+-binding subfamily of mitochondrial carriers, with two EF-hand motifs;transport activity of either Sal1p or Pet9p is critical for viability;polymorphic in different S. cerevisiae strains	SAL1	55.7636
YNL094W	P53933	Phosphatidate phosphatase, converts phosphatidate to diacylglycerol;App1p, Pah1p, Dpp1p, and Lpp1p are responsible for all the phosphatidate phosphatase activity;component of cortical actin patches;interacts with components of endocytic pathway	APP1	66.128					Matrix/IM
YNL122C	P53921	Mitochondrial ribosomal protein of the large subunit;homologous to bacterial L35 and human MRPL35 ribosomal proteins		13.269					Matrix/IM
YNL211C	P53869	Protein that associates with mitochondrial ribosome;green fluorescent protein (GFP)-fusion protein localizes to mitochondria;YNL211C is not an essential gene	MRX7	10.6595					Matrix/IM
YNL213C	P40156	Protein of unknown function;null mutant lacks mitochondrial DNA and cannot grow on glycerol;the authentic, non-tagged protein is detected in highly purified mitochondria in high-throughput studies	RRG9	25.3008					Matrix/IM
YNL295W	P48564	Protein that associates with mitochondrial ribosome	MRX6	61.2642
YNL304W	P48559	Rab GTPase;Myo2p-binding protein implicated in mother-to-bud transport of cortical endoplasmic reticulum (ER), late Golgi, and mitochondria during cell division;function is regulated at multiple levels;abundance of active Ypt11p forms is controlled by phosphorylation status and degradation;normally a low-abundance protein whose ER localization is only detected when protein is highly over expressed	YPT11	47.1126
YNL305C	P48558	Protein involved in apoptosis;variously described as containing a BCL-2 homology (BH3) domain or as a member of the BAX inhibitor family;reported to promote apoptosis under some conditions and to inhibit it in others;localizes to ER and vacuole;may link the unfolded protein response to apoptosis via regulation of calcium-mediated signaling;translocates to mitochondria under apoptosis-inducing con…	BXI1	33.6362
YNL328C	P42834	Constituent of the mitochondrial import motor;associated with the presequence translocase;function overlaps with that of Pam18p;stimulates the ATPase activity of Ssc1p to drive mitochondrial import;contains a J domain	MDJ2	16.4847					Matrix/IM
YNR045W	P07390	Mitochondrial translational activator specific for the COX3 mRNA;acts together with Pet54p and Pet122p;located in the mitochondrial inner membrane	PET494	57.4994
YOL026C	Q08176	Mitochondrial protein required for outer membrane protein import;cooperates with Tom70p to import the subset of proteins with multiple alpha-helical transmembrane segments, including Ugo1p, Tom20p, and others;present in a complex with Mim2p in the outer membrane that may create a local environment to facilitate membrane insertion of substrate proteins;also has a role in assembly of Tom20p into th…	MIM1	12.7536					IMS/IM
YOL095C	Q12039	Mitochondrial inner membrane localized ATP-dependent DNA helicase;required for the maintenance of the mitochondrial genome;not required for mitochondrial transcription;has homology to E. coli helicase uvrD	HMI1	80.5859
YOL114C	Q12322	Protein similar to the human peptidyl-tRNA hydrolase gene ICT1;associates with mitochondrial large subunit;may function in translation termination;YOL114C is not an essential gene	PTH4	23.2134					Matrix/IM
YOR037W	P38909	Mitochondrial peripheral inner membrane protein;contains a FAD cofactor in a domain exposed in the intermembrane space;exhibits redox activity in vitro;likely participates in ligation of heme to acytochromes c and c1 (Cyc1p and Cyt1p)	CYC2	42.3864					IMS/IM
YOR114W	Q12219	Putative protein of unknown function;null mutant is viable	DPI34	35.0011
YOR147W	Q12171	Mitochondrial inner membrane protein with similarity to Mdm31p;required for normal mitochondrial morphology and inheritance;interacts genetically with MMM1, MDM10, MDM12, and MDM34;variation between SK1 and S288C at residues 182 and 262 impacts invasive growth and mitochondrial network structure	MDM32	72.0438					OM
YOR201C	P25270	Ribose methyltransferase;modifies a functionally critical, conserved nucleotide in mitochondrial 21S rRNA	MRM1	46.3988					Matrix/IM
YOR228C	Q12106	Mitochondrial protein of unknown function involved in lipid homeostasis;integral membrane protein that localizes to the mitochondrial outer membrane;involved in mitochondrial morphology;interacts genetically with MDM10, and other members of the ERMES complex;contains five predicted transmembrane domains	MCP1	34.0065					OM
YOR297C	Q08749	Component of the mitochondrial TIM22 complex;involved in insertion of polytopic proteins into the inner membrane;may mediate assembly or stability of the complex	TIM18	21.9766					Matrix/IM
YOR330C	P15801	Mitochondrial DNA polymerase gamma;single subunit of mitochondrial DNA polymerase in yeast, in contrast to metazoan complex of catalytic and accessory subunits;polymorphic in yeast, petites occur more frequently in some lab strains;human ortholog POLG complements yeast mip1 mutant;mutations in human POLG associated with Alpers-Huttenlocher syndrome (AHS), progressive external ophthalmoplegia (PEO…	MIP1	143.532					Matrix/IM
YOR334W	Q01926	Mitochondrial inner membrane Mg(2+) channel;required for maintenance of intramitochondrial Mg(2+) concentrations at the correct level to support splicing of group II introns;similar to bacterial CorA	MRS2	54.2215
YOR346W	P12689	Deoxycytidyl transferase;involved in repair of abasic sites and adducted guanines in damaged DNA by translesion synthesis (TLS);forms a complex with the subunits of DNA polymerase zeta, Rev3p and Rev7p;relocalizes from nucleus to cytoplasm upon DNA replication stress	REV1	112.243
YPL005W	Q12089	Peripheral mitochondrial inner membrane protein;may facilitate use of unformylated tRNA-Met in mitochondrial translation initiation;stabilizes the bicistronic AAP1-ATP6 mRNA	AEP3	70.3501					Matrix/IM
YPL034W	Q03083	Putative protein of unknown function;YPL034W is not essential gene		18.9185
YPL041C	Q03079	Protein that associates with mitochondrial ribosome;SWAT-GFP and mCherry fusion proteins localize to the mitochondria;involved in maintenance of telomere length	MRX11	24.1831					Matrix/IM
YPL060W	Q02783	Mitochondrial inner membrane magnesium transporter;involved in maintenance of mitochondrial magnesium concentrations and membrane potential;indirectly affects splicing of group II introns;functionally and structurally related to Mrs2p	MFM1	47.0885					Matrix/IM
YPL083C	Q02825	Subunit of the tRNA splicing endonuclease;tRNA splicing endonuclease (Sen complex) is composed of Sen2p, Sen15p, Sen34p, and Sen54p;Sen complex also cleaves the CBP1 mRNA at the mitochondrial surface	SEN54	54.6584					OM
YPL159C	Q99373	Mitochondrial protein;required for respiratory growth under some conditions and for stability of the mitochondrial genome	PET20	29.1271
YPL167C	P14284	Catalytic subunit of DNA polymerase zeta;involved in translesion synthesis during post-replication repair;required for mutagenesis induced by DNA damage;involved in double-strand break repair;forms a complex with Rev7p, Pol31p and Pol32p	REV3	172.985
YPL168W	Q12467	Protein that associates with mitochondrial ribosome;green fluorescent protein (GFP)-fusion protein localizes to the mitochondrion;expression may be cell cycle-regulated	MRX4	48.8581					Matrix/IM
YPL172C	P21592	Heme A:farnesyltransferase;catalyzes first step in conversion of protoheme to heme A prosthetic group required for cytochrome c oxidase activity;human ortholog COX10 can complement yeast cox10 null mutant;human ortholog COX10 is associated with mitochondrial disorders	COX10	52.1764					Matrix/IM
YPL189C-A	Q3E823	Cytochrome oxidase assembly factor;null mutation results in respiratory deficiency with specific loss of cytochrome oxidase activity;functions downstream of assembly factors Mss51p and Coa1p and interacts with assembly factor Shy1p	COA2	7.5369
YPR061C	Q12350	Probable Hsp40p co-chaperone;has a DnaJ-like domain and appears to be involved in ER-associated degradation of misfolded proteins containing a tightly folded cytoplasmic domain;inhibits replication of Brome mosaic virus in S. cerevisiae	JID1	35.0371
YPR116W	Q06109	Protein of unknown function;required for mitochondrial genome maintenance;null mutation results in a decrease in plasma membrane electron transport	RRG8	31.1434					Matrix/IM
YPR146C	O13571	Dubious open reading frame;unlikely to encode a functional protein, based on available experimental and comparative sequence data		12.2326
YPR151C	Q06524	Protein required for degradation of unstable forms of cytochrome c;located in the mitochondria	SUE1	24.332

## Sheet: Sheet2
ID	Name	Function	Length	Abund gluc	Total Aas glc			Abund glyc	Total Aas
Q0045	COX1	Cytochrome c OXidase	534	1200	640800			9596	5124264
Q0050	AI1		834	105	87570			136	113424
Q0055	AI2		854	0	0		Total Import	0	0		Total Import
Q0060	AI3		415	0	0		5065037474	0	0		6602368993
Q0065	AI4		556	17	9452			37	20572
Q0070	AI5_ALPHA		630	0	0		Total mito	0	0		Total mito
Q0075	AI5_BETA		354	0	0		2559916	0	0		14431470
Q0080	ATP8	ATP synthase	48	0	0			0	0
Q0085	ATP6	ATP synthase	259	209	54131			885	229215
Q0105	COB	CytochrOme B	385	0	0			0	0
Q0110	BI2		423	0	0			0	0
Q0115	BI3		517	0	0			0	0
Q0120	BI4		638	602	384076			400	255200
Q0130	OLI1	OLIgomycin resistance	76	0	0			0	0
Q0140	VAR1		398	607	241586			1024	407552
Q0160	SCEI		235	0	0			0	0
Q0250	COX2	Cytochrome c OXidase	251	4551	1142301			32993	8281243
Q0255			472	0	0			0	0
Q0275	COX3	Cytochrome c OXidase	269	0	0			0	0
YAL008W	FUN14	Function Unknown Now	198	751	148698			1377	272646
YAL010C	MDM10	Mitochondrial Distribution and Morphology	493	96	47328			141	69513
YAL015C	NTG1	eNdonuclease Three-like Glycosylase	399	27	10773			17	6783
YAL029C	MYO4	MYOsin	1471	336	494256			152	223592
YAL039C	CYC3	CYtochrome C	269	1550	416950			2386	641834
YAL044C	GCV3	GlyCine cleaVage	170	38381	6524770			28340	4817800
YAL044W-A	BOL1	BolA-like protein	110	5930	652300			13959	1535490
YAL046C	BOL3	BolA-like protein	118	1257	148326			1517	179006
YAL048C	GEM1	GTPase EF-hand protein of Mitochondria	662	143	94666			198	131076
YAR008W	SEN34	Splicing ENdonuclease	275	49	13475			6	1650
YAR035W	YAT1		687	1174	806538			8293	5697291
YBL013W	FMT1	Formyl-Methionyl-tRNA Transformylase	401	60	24060			138	55338
YBL015W	ACH1	Acetyl CoA Hydrolase	526	10348	5443048			52593	27663918
YBL022C	PIM1	Proteolysis In Mitochondria	1133	2784	3154272			3063	3470379
YBL030C	PET9	PETite	318	64598	20542164			188346	59894028
YBL038W	MRPL16	Mitochondrial Ribosomal Protein, Large subunit	232	244	56608			605	140360
YBL039W-B	MIN6	mitochondrial MINi protein of ~6 kDa	59	0	0			0	0
YBL045C	COR1	CORe protein of QH2 cytochrome c reductase	457	41221	18837997			126771	57934347
YBL055C			418	1787	746966			1536	642048
YBL057C	PTH2	Peptidyl-Trna Hydrolase	208	6624	1377792			4545	945360
YBL059C-A	CMC2	Cx9C Motif-Containing protein	109	1320	143880			2393	260837
YBL059W	IAI11	Interactor of AIm11	193	296	57128			795	153435
YBL064C	PRX1	PeroxiRedoXin	261	18957	4947777			75737	19767357
YBL080C	PET112	PETite colonies	541	178	96298			238	128758
YBL090W	MRP21	Mitochondrial Ribosomal Protein	177	1180	208860			2282	403914
YBL095W	MRX3	Mitochondrial oRganization of gene eXpression (MIOREX)	270	524	141480			725	195750
YBL098W	BNA4	Biosynthesis of Nicotinic Acid	460	481	221260			547	251620
YBL099W	ATP1	ATP synthase	545	78868	42983060			299125	163023125
YBL107C	MIX23	Mitochondrial Intermembrane space CX(n)C motif protein	196	322	63112			189	37044
YBR003W	COQ1	COenzyme Q	473	676	319748			557	263461
YBR022W	POA1	Phosphatase Of ADP-ribose 1"-phosphate	177	1341	237357			2130	377010
YBR024W	SCO2	Suppressor of Cytochrome Oxidase deficiency	301	742	223342			1016	305816
YBR026C	ETR1	2-Enoyl Thioester Reductase	380	12303	4675140			34684	13179920
YBR035C	PDX3	PyriDoXine auxotrophy	228	24473	5579844			25903	5905884
YBR037C	SCO1	Suppressor of Cytochrome Oxidase deficiency	295	765	225675			1116	329220
YBR039W	ATP3	ATP synthase	311	16268	5059348			57327	17828697
YBR044C	TCM62	TriCarboxylic acid cycle Mutant	572	147	84084			239	136708
YBR047W	FMP23	Found in Mitochondrial Proteome	175	0	0			0	0
YBR054W	YRO2		344	2890	994160			1027	353288
YBR056W			501	5142	2576142			8267	4141767
YBR060C	ORC2	Origin Recognition Complex	620	60	37200			56	34720
YBR084W	MIS1	MItochondrial C1-tetrahydrofolate Synthase	975	5847	5700825			5872	5725200
YBR085W	AAC3	ADP/ATP Carrier	307	0	0			0	0
YBR087W	RFC5	Replication Factor C	354	1221	432234			1027	363558
YBR091C	TIM12	Translocase of the Inner Membrane	109	2719	296371			2876	313484
YBR104W	YMC2	Yeast Mitochondrial Carrier	329	336	110544			108	35532
YBR111C	YSA1		231	11884	2745204			11778	2720718
YBR120C	CBP6	Cytochrome B Protein synthesis	162	2791	452142			4943	800766
YBR121C	GRS1	Glycyl-tRNA Synthase	667	38144	25442048			29782	19864594
YBR122C	MRPL36	Mitochondrial Ribosomal Protein, Large subunit	177	570	100890			968	171336
YBR146W	MRPS9	Mitochondrial Ribosomal Protein, Small subunit	278	987	274386			1828	508184
YBR163W	EXO5	EXOnuclease V	585	0	0			0	0
YBR170C	NPL4	Nuclear Protein Localization	580	2841	1647780			2258	1309640
YBR176W	ECM31	ExtraCellular Mutant	312	877	273624			1074	335088
YBR179C	FZO1	FuZzy Onions homolog	855	337	288135			249	212895
YBR185C	MBA1	Multi-copy Bypass of AFG3	278	170	47260			365	101470
YBR192W	RIM2	Replication In Mitochondria	377	623	234871			686	258622
YBR196C	PGI1	PhosphoGlucoIsomerase	554	253215	140281110			244867	135656318
YBR201C-A	MIN7	mitochondrial MINi protein of ~7 kDa	67	0	0			0	0
YBR221C	PDB1	Pyruvate Dehydrogenase Beta subunit	366	39503	14458098			38344	14033904
YBR227C	MCX1	Mitochondrial ClpX	520	1450	754000			1419	737880
YBR230C	OM14	Outer Membrane Protein of 14 kDa	134	6093	816462			40266	5395644
YBR230W-A	COQ21	COQ interacting protein	66	0	0			0	0
YBR238C			731	179	130849			145	105995
YBR244W	GPX2	Glutathione PeroXidase	162	6068	983016			2307	373734
YBR251W	MRPS5	Mitochondrial Ribosomal Protein, Small subunit	307	1075	330025			1826	560582
YBR255C-A	RCF3	Respiratory superComplex Factor	120	909	109080			2584	310080
YBR262C	MIC12	MItochondrial contact site and Cristae organizing system	106	1843	195358			3575	378950
YBR263W	SHM1	Serine HydroxyMethyltransferase	490	24668	12087320			28569	13998810
YBR268W	MRPL37	Mitochondrial Ribosomal Protein, Large subunit	105	707	74235			1075	112875
YBR269C	SDH8	Succinate DeHydrogenase	138	2082	287316			6594	909972
YBR282W	MRPL27	Mitochondrial Ribosomal Protein, Large subunit	146	842	122932			1428	208488
YBR291C	CTP1	Citrate Transport Protein	299	2111	631189			372	111228
YCL004W	PGS1	PhosphatidylGlycerolphosphate Synthase	521	0	0			0	0
YCL009C	ILV6	IsoLeucine Valine	309	38492	11894028			34844	10766796
YCL017C	NFS1	NiFS-like	497	7932	3942204			9314	4629058
YCL026C-B	HBN1	Homologous to Bacterial Nitroreductases	193	1469	283517			4571	882203
YCL033C	MXR2	peptide Methionine sulfoXide Reductase	168	2161	363048			3955	664440
YCL044C	MGR1	Mitochondrial Genome Required	417	1261	525837			1459	608403
YCL047C	POF1	Promoter Of Filamentation	258	492	126936			440	113520
YCL057C-A	MIC10	MItochondrial contact site and Cristae organizing system	97	2415	234255			5377	521569
YCL057W	PRD1	PRoteinase yscD	712	4282	3048784			4673	3327176
YCL064C	CHA1	Catabolism of Hydroxy Amino acids	360	0	0			0	0
YCR003W	MRPL32	Mitochondrial Ribosomal Protein, Large subunit	183	970	177510			889	162687
YCR005C	CIT2	CITrate synthase	460	2374	1092040			2489	1144940
YCR008W	SAT4		603	18	10854			11	6633
YCR012W	PGK1	3-PhosphoGlycerate Kinase	416	1087113	452239008			1024898	426357568
YCR024C	SLM5	Synthetic Lethal with Mss4	492	229	112668			448	220416
YCR028C-A	RIM1	Replication In Mitochondria	135	23149	3125115			39087	5276745
YCR046C	IMG1	Integrity of Mitochondrial Genome	169	9244	1562236			3360	567840
YCR071C	IMG2	Integrity of Mitochondrial Genome	146	1827	266742			2682	391572
YCR079W	PTC6	Phosphatase Two C	442	124	54808			123	54366
YCR083W	TRX3	ThioRedoXin	127	6823	866521			20587	2614549
YDL003W	MCD1	Mitotic Chromosome Determinant	566	81	45846			39	22074
YDL004W	ATP16	ATP synthase	160	9365	1498400			32845	5255200
YDL027C	MRX9	Mitochondrial oRganization of gene eXpression (MIOREX)	420	145	60900			258	108360
YDL029W	ARP2	Actin-Related Protein	391	15264	5968224			17584	6875344
YDL033C	SLM3	Synthetic Lethal with Mss4	417	21	8757			36	15012
YDL036C	PUS9	PseudoUridine Synthase	462	18	8316			72	33264
YDL044C	MTF2	Mitochondrial Transcription Factor	440	749	329560			788	346720
YDL045W-A	MRP10	Mitochondrial Ribosomal Protein	95	1416	134520			1949	185155
YDL066W	IDP1	Isocitrate Dehydrogenase, NADP-specific	428	59274	25369272			40362	17274936
YDL067C	COX9	Cytochrome c OXidase	59	4921	290339			25127	1482493
YDL069C	CBS1	Cytochrome B Synthesis	229	0	0			0	0
YDL085W	NDE2	NADH Dehydrogenase, External	545	571	311195			5497	2995865
YDL104C	QRI7		407	212	86284			455	185185
YDL107W	MSS2	Mitochondrial Splicing	351	0	0			0	0
YDL119C	HEM25	HEMe synthesis by SLC25 family member	307	141	43287			117	35919
YDL120W	YFH1	Yeast Frataxin Homolog	174	1321	229854			1471	255954
YDL126C	CDC48	Cell Division Cycle	835	43151	36031085			43295	36151325
YDL130W-A	STF1	STabilizing Factor	86	8552	735472			34206	2941716
YDL142C	CRD1	CaRDiolipin synthase	283	64	18112			85	24055
YDL149W	ATG9	AuTophaGy related	997	0	0			0	0
YDL157C			118	290	34220			384	45312
YDL164C	CDC9	Cell Division Cycle	755	457	345035			356	268780
YDL174C	DLD1	D-Lactate Dehydrogenase	587	11083	6505721			18752	11007424
YDL177C			170	83	14110			72	12240
YDL178W	DLD2	D-Lactate Dehydrogenase	530	3661	1940330			3808	2018240
YDL181W	INH1	INHibitor (of F1F0-ATPase)	85	17623	1497955			91006	7735510
YDL183C			320	61	19520			173	55360
YDL198C	GGC1	GDP/GTP Carrier	300	13200	3960000			9324	2797200
YDL202W	MRPL11	Mitochondrial Ribosomal Protein, Large subunit	249	2082	518418			3100	771900
YDL217C	TIM22	Translocase of the Inner Mitochondrial membrane	207	909	188163			1051	217557
YDL219W	DTD1	D-Tyr-tRNA(Tyr) Deacylase	150	2229	334350			2932	439800
YDR019C	GCV1	GlyCine cleaVage	400	10666	4266400			5172	2068800
YDR031W	MIX14	Mitochondrial Intermembrane space CX(n)C motif protein	121	2315	280115			3681	445401
YDR036C	EHD3		500	1392	696000			3391	1695500
YDR041W	RSM10	Ribosomal Small subunit of Mitochondria	203	754	153062			1452	294756
YDR049W	VMS1	VCP/Cdc48-associated Mitochondrial Stress-responsive	632	395	249640			284	179488
YDR050C	TPI1	Triose-Phosphate Isomerase	248	841531	208699688			630138	156274224
YDR058C	TGL2	TriacylGlycerol Lipase	326	76	24776			118	38468
YDR061W			539	1002	540078			1062	572418
YDR065W	RRG1	Required for Respiratory Growth	365	0	0			0	0
YDR070C	FMP16	Found in Mitochondrial Proteome	93	3414	317502			66971	6228303
YDR077W	SED1	Suppression of Exponential Defect	338	0	0			0	0
YDR079W	PET100	PETite colonies	111	695	77145			956	106116
YDR115W	MRX14	Mitochondrial oRganization of gene eXpression (MIOREX)	105	327	34335			2154	226170
YDR116C	MRPL1	Mitochondrial Ribosomal Protein, Large subunit	285	1616	460560			2325	662625
YDR119W-A	COX26		66	2927	193182			23138	1527108
YDR120C	TRM1	tRNA Methyltransferase	570	3724	2122680			3879	2211030
YDR125C	ECM18	ExtraCellular Mutant	453	0	0			0	0
YDR148C	KGD2	alpha-KetoGlutarate Dehydrogenase	463	10212	4728156			51300	23751900
YDR155C	CPR1	Cyclosporin A-sensitive Proline Rotamase	162	342835	55539270			373347	60482214
YDR175C	RSM24	Ribosomal Small subunit of Mitochondria	319	844	269236			1421	453299
YDR178W	SDH4	Succinate DeHydrogenase	181	3377	611237			12815	2319515
YDR185C	UPS3	UnProceSsed	179	0	0			0	0
YDR191W	HST4	Homolog of SIR Two (SIR2)	370	0	0			0	0
YDR194C	MSS116	Mitochondrial Splicing System	664	2366	1571024			2725	1809400
YDR197W	CBS2	Cytochrome B Synthesis	389	0	0			0	0
YDR201W	SPC19	Spindle Pole Component	165	589	97185			558	92070
YDR204W	COQ4	COenzyme Q	335	763	255605			666	223110
YDR219C	MFB1	Mitochondria-associated F-Box protein	465	14	6510			11	5115
YDR226W	ADK1	ADenylate Kinase	222	73007	16207554			69097	15339534
YDR231C	COX20	Cytochrome c OXidase	205	1022	209510			1963	402415
YDR232W	HEM1	HEMe biosynthesis	548	1325	726100			601	329348
YDR234W	LYS4	LYSine requiring	693	11833	8200269			3063	2122659
YDR236C	FMN1	FMN biosynthesis	218	2903	632854			1963	427934
YDR237W	MRPL7	Mitochondrial Ribosomal Protein, Large subunit	292	645	188340			964	281488
YDR256C	CTA1	CaTalase A	515	1865	960475			51835	26695025
YDR258C	HSP78	Heat Shock Protein	811	7950	6447450			12128	9835808
YDR261C	EXG2	EXo-1,3-beta-Glucanase	562	854	479948			399	224238
YDR263C	DIN7	DNA Damage INducible	430	0	0			0	0
YDR268W	MSW1	Mitochondrial aminoacyl-tRNA Synthetase, tryptophan (W)	379	619	234601			695	263405
YDR282C	MRX10	Mitochondrial oRganization of gene eXpression (MIOREX)	414	0	0			0	0
YDR286C	MGP12	Mitochondrial Glutaredoxin-like Protein of 12 kDa	114	828	94392			989	112746
YDR296W	MHR1	Mitochondrial Homologous Recombination	226	889	200914			2162	488612
YDR298C	ATP5	ATP synthase	212	19320	4095840			75830	16075960
YDR305C	HNT2	Histidine triad NucleoTide-binding	217	804	174468			928	201376
YDR316W	OMS1	OXA1 Multicopy Suppressor	471	611	287781			879	414009
YDR322C-A	TIM11	Translocase of the Inner Mitochondrial membrane	96	13424	1288704			41242	3959232
YDR322W	MRPL35	Mitochondrial Ribosomal Protein, Large subunit	367	2020	741340			2781	1020627
YDR326C	YSP2	Yeast Suicide Protein	1438	30	43140			15	21570
YDR332W	IRC3	Increased Recombination Centers	689	0	0			0	0
YDR336W	MRX8	Mitochondrial oRganization of gene eXpression (MIOREX)	314	0	0			0	0
YDR337W	MRPS28	Mitochondrial Ribosomal Protein, Small subunit	286	1377	393822			2473	707278
YDR347W	MRP1	Mitochondrial Ribosomal Protein	321	3023	970383			4161	1335681
YDR349C	YPS7	YaPSin	596	31	18476			24	14304
YDR350C	ATP22	ATPase synthase	684	0	0			0	0
YDR353W	TRR1	ThioRedoxin Reductase	319	56179	17921101			41230	13152370
YDR375C	BCS1	ubiquinol-cytochrome c reductase (bc1) Synthesis	456	223	101688			271	123576
YDR376W	ARH1	Adrenodoxin Reductase Homolog	493	1279	630547			1655	815915
YDR377W	ATP17	ATP synthase	101	7237	730937			29174	2946574
YDR379C-A	SDH6		79	1752	138408			2939	232181
YDR381C-A	COI1	COx Interacting	114	1411	160854			2555	291270
YDR393W	SHE9	Sensitivity to High Expression	456	1675	763800			842	383952
YDR405W	MRP20	Mitochondrial Ribosomal Protein	263	1287	338481			2343	616209
YDR406W	PDR15	Pleiotropic Drug Resistance	1529	121	185009			77	117733
YDR419W	RAD30	RADiation sensitive	632	0	0			0	0
YDR430C	CYM1	CYtosolic Metalloprotease	989	2085	2062065			3053	3019417
YDR438W	THI74	THIamine regulon	370	0	0			0	0
YDR449C	UTP6	U Three Protein	440	440	193600			322	141680
YDR462W	MRPL28	Mitochondrial Ribosomal Protein, Large subunit	147	1996	293412			3156	463932
YDR470C	UGO1	UGO (Japanese for fusion)	502	221	110942			411	206322
YDR487C	RIB3	RIBoflavin biosynthesis	208	18590	3866720			13672	2843776
YDR493W	MZM1	Mitochondrial Zinc Maintenance	123	6738	828774			8910	1095930
YDR494W	RSM28	Ribosomal Small subunit of Mitochondria	361	813	293493			1539	555579
YDR511W	SDH7	Succinate DeHydrogenase	133	2620	348460			5529	735357
YDR512C	EMI1	Early Meiotic Induction	187	326	60962			662	123794
YDR513W	GRX2	GlutaRedoXin	143	20955	2996565			45430	6496490
YDR514C			483	11	5313			10	4830
YDR529C	QCR7	ubiQuinol-cytochrome C oxidoReductase	127	19642	2494534			82753	10509631
YDR538W	PAD1	Phenylacrylic Acid Decarboxylase	242	57	13794			206	49852
YEL006W	YEA6		335	41	13735			35	11725
YEL020W-A	TIM9	Translocase of the Inner Mitochondrial membrane	87	34592	3009504			40194	3496878
YEL024W	RIP1	Rieske Iron-sulfur Protein	215	9128	1962520			35070	7540050
YEL030W	ECM10	ExtraCellular Mutant	644	0	0			0	0
YEL039C	CYC7	CYtochrome C	113	3579	404427			3798	429174
YEL040W	UTR2	Unidentified TRanscript	467	2316	1081572			390	182130
YEL050C	RML2	Ribosomal Mitochondrial Large	393	201	78993			473	185889
YEL052W	AFG1	ATPase Family Gene	509	943	479987			1224	623016
YEL059C-A	SOM1	SOrting Mitochondrial	74	197	14578			156	11544
YER004W	FMP52	Found in Mitochondrial Proteome	231	12822	2961882			24630	5689530
YER014W	HEM14	HEMe biosynthesis	539	1338	721182			2257	1216523
YER017C	AFG3	ATPase Family Gene	761	1203	915483			1479	1125519
YER019W	ISC1	Inositol phosphoSphingolipid phospholipase C	477	590	281430			501	238977
YER026C	CHO1	CHOline requiring	276	5869	1619844			4341	1198116
YER046W	SPO73	SPOrulation	143	321	45903			283	40469
YER047C	SAP1	Sin1 Associated Protein	897	109	97773			129	115713
YER048W-A	ISD11	Iron-Sulfur protein biogenesis, Desulfurase-interacting protein	94	9949	935206			12479	1173026
YER050C	RSM18	Ribosomal Small subunit of Mitochondria	138	852	117576			1663	229494
YER053C	PIC2	PI Carrier	300	2484	745200			4300	1290000
YER057C	HMF1	Homologous Mmf1p Factor	129	53281	6873249			64268	8290572
YER058W	PET117	PETite colonies	107	338	36166			699	74793
YER061C	CEM1	Condensing Enzyme with Mitochondrial function	442	1304	576368			1220	539240
YER069W	ARG5,6	ARGinine requiring	863	10690	9225470			14984	12931192
YER073W	ALD5	ALdehyde Dehydrogenase	520	13416	6976320			9350	4862000
YER077C	MRX1	Mitochondrial oRganization of gene eXpression (MIOREX)	688	16	11008			19	13072
YER078C	ICP55	Intermediate Cleaving Peptidase	511	487	248857			434	221774
YER080W	AIM9	Altered Inheritance rate of Mitochondria	627	5084	3187668			7609	4770843
YER086W	ILV1	IsoLeucine-plus-Valine requiring	576	18755	10802880			12772	7356672
YER087W	AIM10	Altered Inheritance rate of Mitochondria	576	571	328896			782	450432
YER092W	IES5	Ino Eighty Subunit	125	1180	147500			794	99250
YER093C-A	AIM11	Altered Inheritance rate of Mitochondria	137	0	0			0	0
YER141W	COX15	Cytochrome c OXidase	486	2241	1089126			3080	1496880
YER145C	FTR1	Fe TRansporter	404	258	104232			129	52116
YER153C	PET122	PETite colonies	254	40	10160			123	31242
YER154W	OXA1	cytochrome OXidase Activity	402	1497	601794			1994	801588
YER168C	CCA1	tRNA CCA-pyrophosphorylase	546	889	485394			832	454272
YER170W	ADK2	ADenylate Kinase	225	0	0			0	0
YER178W	PDA1	Pyruvate Dehydrogenase Alpha	420	41795	17553900			40245	16902900
YER182W	FMP10	Found in Mitochondrial Proteome	244	1457	355508			3035	740540
YER183C	FAU1	Folinic Acid Utilization	211	510	107610			427	90097
YFL001W	DEG1	DEpressed Growth rate	442	363	160446			242	106964
YFL016C	MDJ1	Mitochondrial DnaJ	511	3220	1645420			4528	2313808
YFL018C	LPD1	LiPoamide Dehydrogenase	499	40084	20001916			97061	48433439
YFL036W	RPO41	RNA POlymerase	1351	68	91868			32	43232
YFL046W	FMP32	Found in Mitochondrial Proteome	207	1289	266823			1375	284625
YFR004W	RPN11	Regulatory Particle Non-ATPase	306	11674	3572244			10582	3238092
YFR011C	MIC19	MItochondrial contact site and Cristae organizing system	170	5094	865980			11255	1913350
YFR019W	FAB1	Forms Aploid and Binucleate cells	2278	25	56950			21	47838
YFR032C-B	MIN10	mitochondrial MINi protein of 10 kDa	87	0	0			0	0
YFR033C	QCR6	ubiQuinol-cytochrome C oxidoReductase	147	11400	1675800			21131	3106257
YFR044C	DUG1	Deficient in Utilization of Glutathione	481	23519	11312639			28032	13483392
YFR045W			309	103	31827			160	49440
YFR049W	YMR31	Yeast Mitochondrial Ribosomal protein	123	8900	1094700			37992	4673016
YFR053C	HXK1	HeXoKinase	485	41868	20305980			247479	120027315
YGL018C	JAC1	J-type Accessory Chaperone	184	575	105800			730	134320
YGL041W-A	DPC13	Delta-Psi dependent mitochondrial import and Cleavage protein of ~13 kDa	154	525	80850			689	106106
YGL057C	GEP7	GEnetic interactors of Prohibitins	287	129	37023			212	60844
YGL059W	PKP2	Protein Kinase of PDH	491	86	42226			162	79542
YGL063W	PUS2	PseudoUridine Synthase	370	0	0			0	0
YGL064C	MRH4	Mitochondrial RNA Helicase	561	160	89760			166	93126
YGL068W	MNP1	Mitochondrial-Nucleoid Protein	194	6897	1338018			10395	2016630
YGL080W	MPC1	Mitochondrial Pyruvate Carrier	130	565	73450			1203	156390
YGL085W	LCL3	Long Chronological Lifespan 3	274	0	0			0	0
YGL107C	RMD9	Required for Meiotic nuclear Division	646	329	212534			396	255816
YGL111W	NSA1	Nop Seven Associated	463	1485	687555			1004	464852
YGL119W	COQ8	COenzyme Q	501	431	215931			1168	585168
YGL129C	RSM23	Ribosomal Small subunit of Mitochondria	450	2127	957150			2800	1260000
YGL136C	MRM2	Mitochondrial rRNA Methyl transferase	320	6	1920			10	3200
YGL143C	MRF1	Mitochondrial peptide chain Release Factor	413	160	66080			248	102424
YGL169W	SUA5	Suppressor of Upstream AUG	426	699	297774			784	333984
YGL187C	COX4	Cytochrome c OXidase	155	25566	3962730			91731	14218305
YGL191W	COX13	Cytochrome c OXidase	129	2406	310374			17934	2313486
YGL209W	MIG2	Multicopy Inhibitor of GAL gene expression	382	0	0			0	0
YGL211W	NCS6	Needs Cla4 to Survive	359	149	53491			137	49183
YGL219C	MDM34	Mitochondrial Distribution and Morphology	459	0	0			0	0
YGL221C	NIF3	Ngg1p-Interacting Factor	288	12395	3569760			9966	2870208
YGL226W	MTC3	Maintenance of Telomere Capping	123	452	55596			1268	155964
YGL236C	MTO1	Mitochondrial Translation Optimization	669	174	116406			342	228798
YGL245W	GUS1	GlUtamyl-tRNA Synthetase	708	43982	31139256			35130	24872040
YGL253W	HXK2	HeXoKinase	486	113899	55354914			149553	72682758
YGL256W	ADH4	Alcohol DeHydrogenase	382	13903	5310946			1193	455726
YGR012W	MCY1	putative Mitochondrial CYsteine synthase	393	3471	1364103			3297	1295721
YGR015C	EAT1	Ethanol AcetylTransferase	328	0	0			0	0
YGR021W	DPC29	Delta-Psi dependent mitochondrial import and Cleavage protein of ~29 kDa	290	231	66990			595	172550
YGR028W	MSP1	Mitochondrial Sorting of Proteins	362	1185	428970			1471	532502
YGR029W	ERV1	Essential for Respiration and Viability	189	1801	340389			2411	455679
YGR031W	IMO32	Intermediate cleaved by Mitochondrial Octapeptidyl aminopeptidase	342	957	327294			1376	470592
YGR033C	TIM21	Translocase of the Inner Mitochondrial membrane	239	1015	242585			1707	407973
YGR046W	TAM41	Translocator Assembly and Maintenance	385	0	0			0	0
YGR049W	SCM4	Suppressor of Cdc4 Mutation	187	4460	834020			4796	896852
YGR053C	MCO32	Mitochondrial Class One protein of 32 kDa	283	3	849			10	2830
YGR062C	COX18	Cytochrome c OXidase	316	0	0			0	0
YGR076C	MRPL25	Mitochondrial Ribosomal Protein, Large subunit	157	1443	226551			3445	540865
YGR082W	TOM20	Translocase of the Outer Mitochondrial membrane	183	5267	963861			4874	891942
YGR084C	MRP13	Mitochondrial Ribosomal Protein	339	2778	941742			4211	1427529
YGR087C	PDC6	Pyruvate DeCarboxylase	563	101	56863			487	274181
YGR094W	VAS1	VAlyl-tRNA Synthetase	1104	27387	30235248			23615	26070960
YGR096W	TPC1	Thiamine Pyrophosphate Carrier	314	24	7536			34	10676
YGR101W	PCP1	Processing of Cytochrome c Peroxidase	346	42	14532			61	21106
YGR102C	GTF1	Glutaminyl Transamidase subunit F	183	38	6954			82	15006
YGR110W	CLD1	CardioLipin-specific Deacylase	445	26	11570			64	28480
YGR112W	SHY1	SURF Homolog of Yeast	389	379	147431			857	333373
YGR132C	PHB1	ProHiBitin	287	11107	3187709			15985	4587695
YGR147C	NAT2	N-terminal AcetylTransferase	288	421	121248			569	163872
YGR150C	CCM1	COB and COX1 mRNA maturation	864	30	25920			46	39744
YGR165W	MRPS35	Mitochondrial Ribosomal Protein, Small subunit	345	975	336375			1813	625485
YGR169C	PUS6	PseudoUridine Synthase	404	41	16564			47	18988
YGR171C	MSM1	Mitochondrial aminoacyl-tRNA Synthetase, Methionine	575	149	85675			177	101775
YGR174C	CBP4	Cytochrome B mRNA Processing	170	2692	457640			7305	1241850
YGR178C	PBP1	Pab1p-Binding Protein	722	1650	1191300			1140	823080
YGR181W	TIM13	Translocase of the Inner Mitochondrial membrane	105	8461	888405			9389	985845
YGR183C	QCR9	ubiQuinol-cytochrome C oxidoReductase	66	3141	207306			12638	834108
YGR192C	TDH3	Triose-phosphate DeHydrogenase	332	323705	107470060			292956	97261392
YGR193C	PDX1	Pyruvate Dehydrogenase complex protein X	410	12199	5001590			8450	3464500
YGR200C	ELP2	ELongator Protein	788	1325	1044100			1277	1006276
YGR207C	CIR1	Changed Intracellular Redox state	261	8999	2348739			9272	2419992
YGR215W	RSM27	Ribosomal Small subunit of Mitochondria	110	1426	156860			2072	227920
YGR220C	MRPL9	Mitochondrial Ribosomal Protein, Large subunit	269	853	229457			1478	397582
YGR222W	PET54	PETite colonies	293	260	76180			412	120716
YGR230W	BNS1	Bypasses Need for Spo12p	137	0	0			0	0
YGR231C	PHB2	ProHiBitin	310	8710	2700100			11754	3643740
YGR234W	YHB1	Yeast flavoHemogloBin	399	113931	45458469			167104	66674496
YGR235C	MIC26	MItochondrial contact site and Cristae organizing system	233	2310	538230			4311	1004463
YGR236C	SPG1	Stationary Phase Gene	95	2436	231420			11321	1075495
YGR240C	PFK1	PhosphoFructoKinase	987	51546	50875902			37910	37417170
YGR243W	MPC3	Mitochondrial Pyruvate Carrier	146	1285	187610			4920	718320
YGR244C	LSC2	Ligase of Succinyl-CoA	427	18849	8048523			55877	23859479
YGR254W	ENO1	ENOlase	437	165245	72212065			464155	202835735
YGR255C	COQ6	COenzyme Q	479	2443	1170197			1784	854536
YGR257C	MTM1	Manganese Trafficking factor for Mitochondrial SOD2	366	754	275964			512	187392
YGR281W	YOR1	Yeast Oligomycin Resistance	1477	133	196441			76	112252
YGR286C	BIO2	BIOtin	375	1315	493125			988	370500
YHL004W	MRP4	Mitochondrial Ribosomal Protein	394	1204	474376			2042	804548
YHL012W			493	0	0			0	0
YHL014C	YLF2		405	114	46170			194	78570
YHL018W	MCO14	Mitochondrial Class One protein of 14 kDa	120	117	14040			165	19800
YHL021C	AIM17	Altered Inheritance rate of Mitochondria	465	13913	6469545			9294	4321710
YHL032C	GUT1	Glycerol UTilization	709	1005	712545			10355	7341695
YHL038C	CBP2	Cytochrome B mRNA Processing	630	238	149940			306	192780
YHR001W-A	QCR10	ubiQuinol-cytochrome C oxidoReductase	77	9215	709555			44548	3430196
YHR002W	LEU5	LEUcine biosynthesis	357	0	0			0	0
YHR003C	TCD1	tRNA ThreonylCarbamoyladenosine Dehydratase	429	1233	528957			980	420420
YHR005C-A	TIM10	Translocase of the Inner Membrane	93	18432	1714176			26124	2429532
YHR008C	SOD2	SuperOxide Dismutase	233	30868	7192244			99005	23068165
YHR011W	DIA4	Digs Into Agar	446	240	107040			461	205606
YHR017W	YSC83		385	330	127050			455	175175
YHR024C	MAS2	Mitochondrial ASsembly	482	3953	1905346			4333	2088506
YHR030C	SLT2	Suppressor of the LyTic phenotype	484	4514	2184776			4231	2047804
YHR037W	PUT2	Proline UTilization	575	4755	2734125			7555	4344125
YHR038W	RRF1	Ribosome Recycling Factor	230	1331	306130			2063	474490
YHR049W	FSH1	Family of Serine Hydrolases	243	12283	2984769			6392	1553256
YHR051W	COX6	Cytochrome c OXidase	148	18309	2709732			66753	9879444
YHR059W	FYV4	Function required for Yeast Viability	130	201	26130			391	50830
YHR063C	PAN5	PANtothenate biosynthesis	379	6813	2582127			2971	1126009
YHR067W	HTD2	Hydroxyacyl-Thioester Dehydratase	280	267	74760			365	102200
YHR070W	TRM5	tRNA Methyltransferase	499	1054	525946			807	402693
YHR075C	PPE1	Phosphoprotein Phosphatase methylEsterase	400	19	7600			33	13200
YHR076W	PTC7	Phosphatase type Two C	343	3189	1093827			3978	1364454
YHR083W	SAM35	Sorting and Assembly Machinery	329	462	151998			533	175357
YHR091C	MSR1	Mitochondrial tRNA Synthetase aRginine	643	20	12860			46	29578
YHR100C	GEP4	GEnetic interactors of Prohibitins	185	377	69745			693	128205
YHR106W	TRR2	ThioRedoxin Reductase	342	650	222300			1227	419634
YHR116W	COX23	Cytochrome OXidase	151	278	41978			616	93016
YHR117W	TOM71	Translocase of the Outer Mitochondrial membrane	639	2250	1437750			1953	1247967
YHR120W	MSH1	MutS Homolog	959	0	0			0	0
YHR147C	MRPL6	Mitochondrial Ribosomal Protein, Large subunit	214	1266	270924			2941	629374
YHR155W	LAM1	Lipid transfer protein Anchored at Membrane contact sites	1228	0	0			0	0
YHR162W	MPC2	Mitochondrial Pyruvate Carrier	129	1285	165765			4920	634680
YHR168W	MTG2	MiTochondrial Gtpase 2	518	15	7770			17	8806
YHR174W	ENO2	ENOlase	437	989539	432428543			498258	217738746
YHR179W	OYE2	Old Yellow Enzyme	400	56946	22778400			38031	15212400
YHR189W	PTH1	Peptidyl-Trna Hydrolase	190	0	0			0	0
YHR194W	MDM31	Mitochondrial Distribution and Morphology	579	0	0			0	0
YHR198C	AIM18	Altered Inheritance rate of Mitochondria	321	2612	838452			2502	803142
YHR199C	AIM46	Altered Inheritance rate of Mitochondria	310	1081	335110			1225	379750
YHR201C	PPX1		397	5395	2141815			3574	1418878
YHR208W	BAT1	Branched-chain Amino acid Transaminase	393	63797	25072221			25291	9939363
YIL006W	YIA6		373	0	0			0	0
YIL022W	TIM44	Translocase of the Inner Mitochondrial membrane	431	6697	2886407			7298	3145438
YIL042C	PKP1	Protein Kinase of PDH	394	138	54372			449	176906
YIL051C	MMF1	Mitochondrial Matrix Factor	145	52672	7637440			55119	7992255
YIL060W			144	0	0			0	0
YIL062C	ARC15	ARp2/3 Complex subunit	154	14195	2186030			16124	2483096
YIL065C	FIS1	mitochondrial FISsion	155	3902	604810			7626	1182030
YIL070C	MAM33	Mitochondrial Acidic Matrix protein	266	6791	1806406			15038	4000108
YIL077C	RCI37	Respiratory Chain Interacting protein of ~37 kDa	320	258	82560			540	172800
YIL087C	AIM19	Altered Inheritance rate of Mitochondria	157	575	90275			1865	292805
YIL093C	RSM25	Ribosomal Small subunit of Mitochondria	264	1658	437712			2303	607992
YIL094C	LYS12	LYSine requiring	371	43206	16029426			17454	6475434
YIL098C	FMC1	Formation of Mitochondrial Complexes	155	945	146475			1653	256215
YIL111W	COX5B	Cytochrome c OXidase	151	521	78671			341	51491
YIL114C	POR2	PORin	281	20	5620			16	4496
YIL124W	AYR1	1-AcyldihYdroxyacetone-phosphate Reductase	297	8367	2484999			15500	4603500
YIL125W	KGD1	alpha-KetoGlutarate Dehydrogenase	1014	17460	17704440			67425	68368950
YIL134W	FLX1	FLavin eXchange	311	0	0			0	0
YIL136W	OM45	Outer Membrane	393	13463	5290959			122294	48061542
YIL139C	REV7	REVersionless	245	0	0			0	0
YIL146C	ATG32	AuTophaGy related	529	0	0			0	0
YIL155C	GUT2	Glycerol UTilization	649	7842	5089458			67458	43780242
YIL156W-B	MCO8	Mitochondrial Class One protein of 8 kDa	73	2340	170820			4789	349597
YIL157C	COA1	Cytochrome Oxidase Assembly	197	2033	400501			2916	574452
YIL160C	POT1	Peroxisomal Oxoacyl Thiolase	417	3573	1489941			50283	20968011
YIR021W	MRS1	Mitochondrial RNA Splicing	363	375	136125			604	219252
YIR024C	INA22	INner membrane Assembly 22 kDa	216	156	33696			258	55728
YIR037W	HYR1	HYdroperoxide Resistance	163	24199	3944437			34737	5662131
YJL003W	COX16	Cytochrome c OXidase	118	0	0			0	0
YJL005W	CYR1	CYclic AMP Requirement	2026	238	482188			249	504474
YJL023C	PET130	PETite colonies	347	0	0			0	0
YJL043W			257	0	0			0	0
YJL045W			634	704	446336			1479	937686
YJL046W	AIM22	Altered Inheritance rate of Mitochondria	409	92	37628			121	49489
YJL052W	TDH1	Triose-phosphate DeHydrogenase	332	119619	39713508			215544	71560608
YJL054W	TIM54	Translocase of the Inner Mitochondrial membrane	478	741	354198			817	390526
YJL060W	BNA3	Biosynthesis of Nicotinic Acid	444	4277	1898988			2791	1239204
YJL062W-A	COA3	Cytochrome Oxidase Assembly	85	2049	174165			3705	314925
YJL063C	MRPL8	Mitochondrial Ribosomal Protein, Large subunit	238	3175	755650			4821	1147398
YJL066C	MPM1	Mitochondrial Peculiar Membrane protein	252	1999	503748			4895	1233540
YJL071W	ARG2	ARGinine requiring	574	99	56826			143	82082
YJL082W	IML2	Increased Minichromosome Loss	731	1609	1176179			1867	1364777
YJL096W	MRPL49	Mitochondrial Ribosomal Protein, Large subunit	161	850	136850			1680	270480
YJL102W	MEF2	Mitochondrial Elongation Factor	819	248	203112			476	389844
YJL104W	PAM16	Presequence translocase-Associated Motor	149	3703	551747			3379	503471
YJL112W	MDV1	Mitochondrial DiVision	714	799	570486			1109	791826
YJL126W	NIT2	NITrilase superfamily	307	55	16885			127	38989
YJL127C-B	MCO6	Mitochondrial Class One protein of 6 kDa	52	0	0			0	0
YJL131C	AIM23	Altered Inheritance rate of Mitochondria	356	217	77252			397	141332
YJL133C-A	DPI8	Delta-Psi dependent mitochondrial Import protein of 8 kDa	74	554	40996			1139	84286
YJL133W	MRS3	Mitochondrial RNA Splicing	314	149	46786			95	29830
YJL143W	TIM17	Translocase of the Inner Mitochondrial membrane	158	239	37762			249	39342
YJL145W	SFH5	Sec Fourteen Homolog	294	2547	748818			2441	717654
YJL147C	SMT1	Suppression of Mitochondrial Translation	382	0	0			0	0
YJL158C	CIS3	CIk1 Suppressing	227	2276	516652			1897	430619
YJL161W	FMP33	Found in Mitochondrial Proteome	180	1341	241380			3729	671220
YJL166W	QCR8	ubiQuinol-cytochrome C oxidoReductase	94	9641	906254			10020	941880
YJL178C	ATG27	AuTophaGy related	271	1915	518965			1882	510022
YJL180C	ATP12	ATP synthase	325	1186	385450			1819	591175
YJL200C	ACO2	ACOnitase	789	20667	16306263			4112	3244368
YJL205C	NCE101	NonClassical Export	53	389	20617			931	49343
YJL208C	NUC1	NUClease	329	1601	526729			1506	495474
YJL209W	CBP1	Cytochrome B mRNA Processing	654	0	0			0	0
YJR003C	MRX12	Mitochondrial oRganization of gene eXpression (MIOREX)	519	338	175422			337	174903
YJR009C	TDH2	Triose-phosphate DeHydrogenase	332	52316	17368912			32028	10633296
YJR016C	ILV3	IsoLeucine-plus-Valine requiring	585	43051	25184835			35443	20734155
YJR019C	TES1	ThioESterase	349	1398	487902			10404	3630996
YJR034W	PET191	PETite colonies	108	1379	148932			1780	192240
YJR039W	MLO127	Mitochondrially LOcalized protein of 127 kDa	1121	0	0			0	0
YJR045C	SSC1	Stress-Seventy subfamily C	654	99173	64859142			103603	67756362
YJR048W	CYC1	CYtochrome C	109	54146	5901914			155053	16900777
YJR051W	OSM1	OSMotic sensitivity	501	2637	1321137			2392	1198392
YJR062C	NTA1	N-Terminal Amidase	457	194	88658			189	86373
YJR074W	MOG1	Multicopy suppressor Of ts Gsp1	218	1919	418342			1937	422266
YJR077C	MIR1	Mitochondrial Import Receptor	311	32590	10135490			101566	31587026
YJR080C	AIM24	Altered Inheritance rate of Mitochondria	394	1906	750964			3159	1244646
YJR085C	TMH11	TMem14 Homolog of 11 kDa	105	937	98385			1752	183960
YJR091C	JSN1	Just Say No	1091	790	861890			706	770246
YJR095W	SFC1	Succinate-Fumarate Carrier	322	2135	687470			40832	13147904
YJR100C	AIM25	Altered Inheritance of Mitochondria	327	251	82077			322	105294
YJR101W	RSM26	Ribosomal Small subunit of Mitochondria	266	1264	336224			1706	453796
YJR104C	SOD1	SuperOxide Dismutase	154	292588	45058552			350362	53955748
YJR111C	PXP2	PeroXisomal Protein	283	1763	498929			1786	505438
YJR113C	RSM7	Ribosomal Small subunit of Mitochondria	247	1796	443612			2796	690612
YJR121W	ATP2	ATP synthase	511	90560	46276160			356034	181933374
YJR122W	IBA57	Iron-sulfur cluster assembly factor for Biotin synthase and Aconitase-like mitochondrial proteins	497	361	179417			209	103873
YJR135W-A	TIM8	Translocase of the Inner Mitochondrial membrane	87	9049	787263			11120	967440
YJR144W	MGM101	Mitochondrial Genome Maintenance	269	4801	1291469			6347	1707343
YJR149W			404	96	38784			287	115948
YKL003C	MRP17	Mitochondrial Ribosomal Protein	131	2310	302610			2627	344137
YKL011C	CCE1	Cruciform Cutting Endonuclease	353	22	7766			38	13414
YKL016C	ATP7	ATP synthase	174	10468	1821432			40938	7123212
YKL018C-A	MCO12	Mitochondrial Class One protein of 12 kDa	99	165	16335			522	51678
YKL023C-A	MIN9	mitochondrial MINi protein of 9 kDa	75	0	0			0	0
YKL026C	GPX1	Glutathione PeroXidase	167	328	54776			1864	311288
YKL027W	TCD2	tRNA ThreonylCarbamoyladenosine Dehydratase	447	3584	1602048			4295	1919865
YKL029C	MAE1	MAlic Enzyme	669	17789	11900841			5552	3714288
YKL037W	AIM26	Altered Inheritance rate of Mitochondria	118	0	0			0	0
YKL040C	NFU1	NifU-like protein	256	10527	2694912			12490	3197440
YKL044W	MMO1	Mini Mitochondria ORF	106	0	0			0	0
YKL051W	SFK1	Suppressor of Four Kinase	353	74	26122			50	17650
YKL053C-A	MDM35	Mitochondrial Distribution and Morphology	86	1883	161938			2163	186018
YKL055C	OAR1	3-Oxoacyl-[Acyl-carrier-protein] Reductase	278	0	0			0	0
YKL056C	TMA19	Translation Machinery Associated	167	200687	33514729			113912	19023304
YKL060C	FBA1	Fructose-1,6-Bisphosphate Aldolase	359	1276423	458235857			1095207	393179313
YKL065W-A	DPC7	Delta-Psi dependent mitochondrial import and Cleavage protein of 7 kDa	73	1704	124392			7824	571152
YKL067W	YNK1	Yeast Nucleoside diphosphate Kinase	153	36760	5624280			110802	16952706
YKL071W			256	255	65280			1001	256256
YKL084W	HOT13	Helper Of Tim	116	0	0			0	0
YKL085W	MDH1	Malate DeHydrogenase	334	52987	17697658			241340	80607560
YKL087C	CYT2	CYTochrome-c1-heme-lyase	224	983	220192			1139	255136
YKL101W	HSL1	Histone Synthetic Lethal	1518	98	148764			112	170016
YKL106W	AAT1	Aspartate AminoTransferase	451	410	184910			612	276012
YKL113C	RAD27	RADiation sensitive	382	2134	815188			1739	664298
YKL114C	APN1	APurinic/apyrimidinic eNdonuclease	367	1940	711980			1920	704640
YKL120W	OAC1	OxaloAcetate Carrier	324	9227	2989548			2571	833004
YKL133C	RCI50	Respiratory Chain Interacting protein of ~50 kDa	463	0	0			0	0
YKL134C	2001-10-01	OCTapeptidyl aminopeptidase	772	5741	4432052			6384	4928448
YKL137W	CMC1	Cx9C Mitochondrial protein necessary for full assembly of Cytochrome c oxidase	111	155	17205			502	55722
YKL138C	MRPL31	Mitochondrial Ribosomal Protein, Large subunit	131	1266	165846			2356	308636
YKL141W	SDH3	Succinate DeHydrogenase	198	2665	527670			18383	3639834
YKL148C	SDH1	Succinate DeHydrogenase	640	6537	4183680			33739	21592960
YKL150W	MCR1	Mitochondrial NADH-Cytochrome b5 Reductase	302	21471	6484242			66078	19955556
YKL152C	GPM1	Glycerate PhosphoMutase	247	876854	216582938			578317	142844299
YKL155C	RSM22	Ribosomal Small subunit of Mitochondria	628	193	121204			237	148836
YKL157W	APE2	AminoPEptidase	952	11257	10716664			15901	15137752
YKL162C			402	0	0			0	0
YKL167C	MRP49	Mitochondrial Ribosomal Protein	137	1075	147275			1525	208925
YKL170W	MRPL38	Mitochondrial Ribosomal Protein, Large subunit	138	2416	333408			5465	754170
YKL192C	ACP1	Acyl Carrier Protein	125	5238	654750			6947	868375
YKL194C	MST1	Mitochondrial aminoacyl-tRNA Synthetase, Threonine	462	214	98868			295	136290
YKL195W	MIA40	Mitochondrial intermembrane space Import and Assembly	403	4147	1671241			6431	2591693
YKL204W	EAP1	EIF4E-Associated Protein	632	3054	1930128			3391	2143112
YKL208W	CBT1	Cytochrome B Termination	271	0	0			0	0
YKR006C	MRPL13	Mitochondrial Ribosomal Protein, Large subunit	264	1948	514272			2793	737352
YKR016W	MIC60	MItochondrial contact site and Cristae organizing system	540	7967	4302180			17875	9652500
YKR031C	SPO14	SPOrulation	1683	90	151470			37	62271
YKR036C	CAF4	CCR4 Associated Factor	643	265	170395			268	172324
YKR042W	UTH1	yoUTH	365	10170	3712050			13665	4987725
YKR049C	FMP46	Found in Mitochondrial Proteome	133	1874	249242			10439	1388387
YKR052C	MRS4	Mitochondrial RNA Splicing	304	141	42864			170	51680
YKR065C	PAM17	Presequence translocase-Associated Motor	197	1398	275406			2104	414488
YKR066C	CCP1	Cytochrome c Peroxidase	361	8440	3046840			18188	6565868
YKR070W			352	2249	791648			3576	1258752
YKR071C	DRE2	Derepressed for Ribosomal protein S14 Expression	348	1748	608304			818	284664
YKR076W	ECM4	ExtraCellular Mutant	370	1368	506160			7027	2599990
YKR079C	TRZ1	tRNase Z	838	326	273188			322	269836
YKR085C	MRPL20	Mitochondrial Ribosomal Protein, Large subunit	195	1849	360555			2776	541320
YKR087C	OMA1	Overlapping activity with M-AAA protease	345	432	149040			587	202515
YLL001W	DNM1	DyNaMin-related	757	3232	2446624			5888	4457216
YLL006W	MMM1	Maintenance of Mitochondrial Morphology	426	223	94998			221	94146
YLL007C	LMO1	eLMO homolog	665	31	20615			30	19950
YLL009C	COX17	Cytochrome c OXidase	69	3082	212658			6381	440289
YLL013C	PUF3	PUmilio-homology domain Family	879	1495	1314105			1611	1416069
YLL018C-A	COX19	Cytochrome c OXidase	98	233	22834			415	40670
YLL024C	SSA2	Stress-Seventy subfamily A	639	67110	42883290			10255	6552945
YLL027W	ISA1	Iron Sulfur Assembly	250	0	0			0	0
YLL033W	IRC19	Increased Recombination Centers	230	0	0			0	0
YLL040C	VPS13	Vacuolar Protein Sorting	3144	1216	3823104			1307	4109208
YLL041C	SDH2	Succinate DeHydrogenase	266	11429	3040114			85568	22761088
YLR008C	PAM18	Presequence translocase-Associated Motor	168	3983	669144			3878	651504
YLR017W	MEU1	Multicopy Enhancer of UAS2	337	3152	1062224			1852	624124
YLR022C	SDO1		250	1536	384000			697	174250
YLR038C	COX12	Cytochrome c OXidase	83	7028	583324			42099	3494217
YLR043C	TRX1	ThioRedoXin	103	37426	3854878			46825	4822975
YLR049C	MLO50	Mitochondrially LOcalized protein of 50 kDa	428	0	0			0	0
YLR059C	REX2	Rna EXonuclease	269	1437	386553			1766	475054
YLR067C	PET309	PETite colonies	965	0	0			0	0
YLR069C	MEF1	Mitochondrial Elongation Factor	761	3522	2680242			4919	3743359
YLR077W	FMP25	Found in Mitochondrial Proteome	583	528	307824			937	546271
YLR084C	RAX2		1220	152	185440			152	185440
YLR087C	CSF1	Cold Sensitive for Fermentation	2958	0	0			0	0
YLR089C	ALT1	ALanine Transaminase	592	3472	2055424			4142	2452064
YLR090W	XDJ1		459	630	289170			503	230877
YLR091W	GEP5	GEnetic interactors of Prohibitins	293	34	9962			53	15529
YLR099W-A	MIM2		87	144	12528			161	14007
YLR105C	SEN2	Splicing ENdonuclease	377	1586	597922			868	327236
YLR118C	TML25	acyl-protein Thioesterase with Multiple Localizations, protein of 25 kDa	227	2937	666699			2635	598145
YLR132C	USB1	U Six Biogenesis	290	26	7540			21	6090
YLR139C	SLS1	Synthetic Lethal with SSM4	643	66	42438			127	81661
YLR142W	PUT1	Proline UTilization	476	0	0			0	0
YLR151C	PCD1	Peroxisomal Coenzyme A Diphosphatase	340	156	53040			379	128860
YLR154W-C	TAR1	Transcript Antisense to Ribosomal RNA	124	0	0			0	0
YLR163C	MAS1	Mitochondrial ASsembly	462	2812	1299144			2854	1318548
YLR164W	SHH4	SDH4 Homolog	168	69	11592			1038	174384
YLR165C	PUS5	PseudoUridine Synthase	254	0	0			0	0
YLR168C	UPS2	UnProceSsed	230	0	0			0	0
YLR188W	MDL1	MultiDrug resistance-Like	695	249	173055			276	191820
YLR190W	MMR1	Mitochondrial Myo2p Receptor-related	491	67	32897			33	16203
YLR193C	UPS1	UnProceSsed	175	0	0			0	0
YLR201C	COQ9	COenzyme Q	260	3265	848900			2015	523900
YLR203C	MSS51	Mitochondrial Splicing Suppressor	436	2275	991900			3333	1453188
YLR204W	QRI5	Quasi-Renownless Information	111	0	0			0	0
YLR218C	COA4	Cytochrome Oxidase Assembly factor	150	416	62400			590	88500
YLR239C	LIP2	LIPoyl ligase	328	53	17384			77	25256
YLR251W	SYM1	Stress-inducible Yeast Mpv17	197	0	0			0	0
YLR253W	MCP2	Mdm10 Complementing Protein	569	213	121197			273	155337
YLR256W	HAP1	Heme Activator Protein	1502	0	0			0	0
YLR259C	HSP60	Heat Shock Protein	572	114767	65646724			127139	72723508
YLR281C	RSO55	mitochondrial protein Related to Spastic paraplegia with Optic atrophy and neuropathy SPG55	155	0	0			0	0
YLR283W			314	102	32028			146	45844
YLR289W	GUF1	Gtpase of Unknown Function	645	0	0			0	0
YLR290C	COQ11	COenzyme Q	277	814	225478			1232	341264
YLR295C	ATP14	ATP synthase	124	5512	683488			17917	2221708
YLR304C	ACO1	ACOnitase	778	79401	61773978			152031	118280118
YLR305C	STT4	STaurosporine and Temperature sensitive	1900	247	469300			195	370500
YLR307C-A	DPA10	Delta-Psi dependent mitochondrial Assembly protein of 10 kDa	87	0	0			0	0
YLR312W-A	MRPL15	Mitochondrial Ribosomal Protein, Large subunit	253	2520	637560			3532	893596
YLR346C	CIS1	CItrinin Sensitive knockout	101	0	0			0	0
YLR348C	DIC1	DIcarboxylate Carrier	298	1191	354918			4234	1261732
YLR351C	NIT3	NITrilase superfamily	291	7069	2057079			9440	2747040
YLR355C	ILV5	IsoLeucine-plus-Valine requiring	395	219249	86603355			158373	62557335
YLR356W	ATG33	AuTophaGy related	197	762	150114			1181	232657
YLR369W	SSQ1	Stress-Seventy subfamily Q	657	1944	1277208			1694	1112958
YLR370C	ARC18	ARp2/3 Complex subunit	178	9021	1605738			9212	1639736
YLR382C	NAM2	Nuclear Accommodation of Mitochondria	894	188	168072			371	331674
YLR389C	STE23	STErile	1027	1961	2013947			2087	2143349
YLR390W	ECM19	ExtraCellular Mutant	112	598	66976			844	94528
YLR393W	ATP10	ATP synthase	279	649	181071			1190	332010
YLR395C	COX8	Cytochrome c OXidase	78	587	45786			3433	267774
YLR422W	DCK1	DoCK1 homolog	1932	24	46368			21	40572
YLR439W	MRPL4	Mitochondrial Ribosomal Protein, Large subunit	319	1229	392051			2834	904046
YML007C-A	MIN4	mitochondrial MINi protein of 4 kDa	36	0	0			0	0
YML009C	MRPL39	Mitochondrial Ribosomal Protein, Large subunit	70	2430	170100			4972	348040
YML021C	UNG1	Uracil DNA N-Glycosylase	359	136	48824			48	17232
YML025C	YML6		286	1839	525954			2909	831974
YML030W	RCF1	Respiratory superComplex Factor	159	1236	196524			3303	525177
YML042W	CAT2	Carnitine AcetylTransferase	670	2669	1788230			22420	15021400
YML050W	AIM32	Altered Inheritance rate of Mitochondria	311	208	64688			508	157988
YML054C	CYB2	CYtochrome B	591	5390	3185490			48598	28721418
YML060W	OGG1	8-OxoGuanine Glycosylase/lyase	376	0	0			0	0
YML061C	PIF1	Petite Integration Frequency	859	0	0			0	0
YML078W	CPR3	Cyclosporin A-sensitive Proline Rotamase	182	18387	3346434			25044	4558008
YML080W	DUS1	DihydroUridine Synthase	423	370	156510			317	134091
YML081C-A	ATP18	ATP synthase	59	9709	572831			37910	2236690
YML086C	ALO1	D-Arabinono-1,4-Lactone Oxidase	526	9481	4987006			9933	5224758
YML091C	RPM2	RNase P Mitochondrial	1202	90	108180			77	92554
YML110C	COQ5	COenzyme Q	307	4674	1434918			3981	1222167
YML120C	NDI1	NADH Dehydrogenase Internal	513	8376	4296888			42591	21849183
YML128C	MSC1	Meiotic Sister-Chromatid recombination	513	11929	6119577			52709	27039717
YML129C	COX14	Cytochrome c OXidase	70	497	34790			1294	90580
YMR002W	MIX17	Mitochondrial Intermembrane space CX(n)C motif protein	156	1829	285324			1287	200772
YMR003W	AIM34	Altered Inheritance rate of Mitochondria	198	179	35442			204	40392
YMR023C	MSS1	Mitochondrial Splicing System	526	0	0			0	0
YMR024W	MRPL3	Mitochondrial Ribosomal Protein, Large subunit	390	2411	940290			2968	1157520
YMR030W	RSF1	ReSpiration Factor	376	0	0			0	0
YMR035W	IMP2	Inner Membrane Protease	177	0	0			0	0
YMR038C	CCS1	Copper Chaperone for SOD1	249	6197	1543053			4195	1044555
YMR056C	AAC1	ADP/ATP Carrier	309	8485	2621865			27574	8520366
YMR059W	SEN15	Splicing ENdonuclease	128	0	0			0	0
YMR060C	SAM37	Sorting and Assembly Machinery	327	482	157614			525	171675
YMR061W	RNA14	poly(A) mRNA metabolism	677	198	134046			189	127953
YMR062C	ARG7	ARGinine requiring	441	17692	7802172			11964	5276124
YMR064W	AEP1	ATPase ExPression	518	0	0			0	0
YMR066W	SOV1	Synthesis Of Var	898	29	26042			15	13470
YMR072W	ABF2	ARS-Binding Factor	183	29839	5460537			50262	9197946
YMR083W	ADH3	Alcohol DeHydrogenase	375	40322	15120750			34972	13114500
YMR087W	PDL32	Protein of Dual Localization of 32 kDa	284	139	39476			221	62764
YMR089C	YTA12	Yeast Tat-binding Analog	825	1376	1135200			1747	1441275
YMR097C	MTG1	MiTochondrial GTPase	367	62	22754			75	27525
YMR098C	ATP25	ATPase	612	82	50184			143	87516
YMR108W	ILV2	IsoLeucine-plus-Valine requiring	687	34014	23367618			21287	14624169
YMR110C	HFD1	Homolog of Fatty aldehyde Dehydrogenase	532	4423	2353036			13695	7285740
YMR113W	FOL3	FOLic acid synthesis	427	430	183610			420	179340
YMR115W	MGR3	Mitochondrial Genome Required	501	451	225951			492	246492
YMR118C	SHH3	SDH3 Homolog	196	0	0			0	0
YMR130W	DPI35	Delta-Psi dependent mitochondrial Import protein of 35 kDa	302	467	141034			363	109626
YMR145C	NDE1	NADH Dehydrogenase, External	560	12683	7102480			18277	10235120
YMR150C	IMP1	Inner Membrane Protease	190	63	11970			410	77900
YMR157C	AIM36	Altered Inheritance rate of Mitochondria	255	1367	348585			1867	476085
YMR158W	MRPS8	Mitochondrial Ribosomal Protein, Small subunit	155	3062	474610			4699	728345
YMR166C	MME1	Mitochondrial Magnesium Exporter	368	0	0			0	0
YMR177W	MMT1	Mitochondrial Metal Transporter	510	68	34680			57	29070
YMR182W-A	MIN3	mitochondrial MINi protein of 3 kDa	28	0	0			0	0
YMR187C			431	0	0			0	0
YMR188C	MRPS17	Mitochondrial Ribosomal Protein, Small subunit	237	1594	377778			2942	697254
YMR189W	GCV2	GlyCine cleaVage	1034	4722	4882548			2218	2293412
YMR193W	MRPL24	Mitochondrial Ribosomal Protein, Large subunit	258	920	237360			1577	406866
YMR194C-B	CMC4	Cx9C Motif-Containing protein	73	683	49859			1357	99061
YMR203W	TOM40	Translocase of the Outer Mitochondrial membrane	387	17827	6899049			19562	7570494
YMR205C	PFK2	PhosphoFructoKinase	959	48576	46584384			36243	34757037
YMR207C	HFA1		2123	0	0			0	0
YMR210W	MGL2	MonoacylGlycerol Lipase	449	99	44451			84	37716
YMR225C	MRPL44	Mitochondrial Ribosomal Protein, Large subunit	98	465	45570			742	72716
YMR228W	MTF1	Mitochondrial Transcription Factor	341	814	277574			1042	355322
YMR241W	YHM2	Yeast suppressor of HM mutant	314	31970	10038580			18852	5919528
YMR244C-A	COA6	Cytochrome Oxidase Assembly	104	1693	176072			2581	268424
YMR252C	MLO1	Mitochondrially LOcalized protein	134	0	0			0	0
YMR256C	COX7	Cytochrome c OXidase	60	834	50040			3240	194400
YMR257C	PET111	PETite colonies	800	0	0			0	0
YMR267W	PPA2	PyroPhosphatAse	310	2249	697190			1620	502200
YMR282C	AEP2	ATPase ExPression	580	36	20880			146	84680
YMR286W	MRPL33	Mitochondrial Ribosomal Protein, Large subunit	86	2267	194962			3702	318372
YMR287C	DSS1	Deletion of SUV3 Supressor	969	14	13566			21	20349
YMR293C	HER2	Hmg2p ER Remodeling	464	67	31088			168	77952
YMR301C	ATM1	ABC Transporter, Mitochondrial	690	1007	694830			953	657570
YMR302C	YME2	Yeast Mitochondrial Escape	850	1952	1659200			2392	2033200
YNL003C	PET8	PETite colonies	284	283	80372			288	81792
YNL005C	MRP7	Mitochondrial Ribosomal Protein	371	2122	787262			3866	1434286
YNL026W	SAM50	Sorting and Assembly Machinery	484	1144	553696			1511	731324
YNL036W	NCE103	NonClassical Export	221	3048	673608			4195	927095
YNL037C	IDH1	Isocitrate DeHydrogenase	360	39415	14189400			66646	23992560
YNL052W	COX5A	Cytochrome c OXidase	153	4040	618120			28532	4365396
YNL055C	POR1	PORin	283	224301	63477183			629897	178260851
YNL063W	MTQ1	Methyltransferase	314	985	309290			676	212264
YNL066W	SUN4	Sim1 Uth1 Nca3	420	691	290220			345	144900
YNL070W	TOM7	Translocase of the Outer Mitochondrial membrane	60	8701	522060			9422	565320
YNL071W	LAT1		482	27618	13311876			28504	13738928
YNL073W	MSK1	Mitochondrial aminoacyl-tRNA Synthetase, lysine (K)	576	243	139968			310	178560
YNL081C	SWS2	Sick Without Securin	143	357	51051			648	92664
YNL083W	SAL1	Suppressor of Aac2 Lethality	494	0	0			0	0
YNL094W	APP1	Actin Patch Protein	587	0	0			0	0
YNL098C	RAS2	homologous to RAS proto-oncogene	322	9073	2921506			11183	3600926
YNL100W	MIC27	MItochondrial contact site and Cristae organizing system	234	1228	287352			2415	565110
YNL104C	LEU4	LEUcine biosynthesis	619	27297	16896843			37970	23503430
YNL106C	INP52	INositol polyphosphate 5-Phosphatase	1183	57	67431			50	59150
YNL121C	TOM70	Translocase of the Outer Mitochondrial membrane	617	15742	9712814			15393	9497481
YNL122C			115	0	0			0	0
YNL125C	ESBP6		673	49	32977			48	32304
YNL129W	NRK1	Nicotinamide Riboside Kinase	240	845	202800			457	109680
YNL130C	CPT1	CholinePhosphoTransferase	393	2278	895254			1436	564348
YNL131W	TOM22	Translocase of the Outer Mitochondrial membrane	152	15830	2406160			14439	2194728
YNL133C	FYV6	Function required for Yeast Viability	173	583	100859			413	71449
YNL137C	NAM9	Nuclear Accommodation of Mitochondria	486	1467	712962			2563	1245618
YNL168C	FMP41	Found in Mitochondrial Proteome	259	2618	678062			2864	741776
YNL169C	PSD1	PhosphatidylSerine Decarboxylase	500	2223	1111500			2106	1053000
YNL177C	MRPL22	Mitochondrial Ribosomal Protein, Large subunit	309	1054	325686			1606	496254
YNL185C	MRPL19	Mitochondrial Ribosomal Protein, Large subunit	158	2270	358660			3591	567378
YNL211C	MRX7	Mitochondrial oRganization of gene eXpression (MIOREX)	86	0	0			0	0
YNL213C	RRG9	Required for Respiratory Growth	214	0	0			0	0
YNL247W	CRS1	Cysteinyl-tRNA Synthetase, CysRS	767	11463	8792121			8814	6760338
YNL252C	MRPL17	Mitochondrial Ribosomal Protein, Large subunit	281	1147	322307			2134	599654
YNL256W	FOL1	FOLic acid synthesis	824	694	571856			487	401288
YNL284C	MRPL10	Mitochondrial Ribosomal Protein, Large subunit	322	1360	437920			2276	732872
YNL292W	PUS4	PseudoUridine Synthase	403	1771	713713			1474	594022
YNL295W	MRX6	Mitochondrial oRganization of gene eXpression (MIOREX)	524	0	0			0	0
YNL304W	YPT11	Yeast Protein Two	417	0	0			0	0
YNL305C	BXI1	BaX Inhibitor	297	0	0			0	0
YNL306W	MRPS18	Mitochondrial Ribosomal Protein, Small subunit	217	1360	295120			1715	372155
YNL310C	ZIM17	ZInc finger Motif protein of 17 kDa	174	1143	198882			1156	201144
YNL315C	ATP11	ATP synthase	318	1162	369516			1649	524382
YNL328C	MDJ2	Mitochondrial DnaJ homolog	146	0	0			0	0
YNR001C	CIT1	CITrate synthase	479	49767	23838393			179328	85898112
YNR003C	RPC34	RNA Polymerase C	317	486	154062			431	136627
YNR015W	SMM1	Suppressor of Mitochondrial Mutation	384	1081	415104			788	302592
YNR017W	TIM23	Translocase of the Inner Mitochondrial membrane	222	11590	2572980			11468	2545896
YNR018W	RCF2	Respiratory superComplex Factor	224	3704	829696			5325	1192800
YNR020C	ATP23		270	424	114480			443	119610
YNR022C	MRPL50	Mitochondrial Ribosomal Protein, Large subunit	139	612	85068			1255	174445
YNR036C	MRPS12	Mitochondrial Ribosomal Protein, Small subunit	153	1339	204867			2233	341649
YNR037C	RSM19	Ribosomal Small subunit of Mitochondria	91	1148	104468			2134	194194
YNR040W	MRX15	Mitochondrial oRganization of gene eXpression (MIOREX)	256	594	152064			779	199424
YNR041C	COQ2	COenzyme Q	372	718	267096			756	281232
YNR045W	PET494	PETite colonies	489	0	0			0	0
YNR074C	AIF1	Apoptosis-Inducing Factor	378	1762	666036			841	317898
YOL008W	COQ10	COenzyme Q	207	198	40986			225	46575
YOL009C	MDM12	Mitochondrial Distribution and Morphology	271	127	34417			136	36856
YOL023W	IFM1	Initiation Factor of Mitochondria	676	136	91936			237	160212
YOL026C	MIM1	Mitochondrial IMport	113	0	0			0	0
YOL027C	MDM38	Mitochondrial Distribution and Morphology	573	3111	1782603			5196	2977308
YOL033W	MSE1	Mitochondrial aminoacyl-tRNA Synthetase, Glutamate (E)	536	2705	1449880			2018	1081648
YOL038W	PRE6	PRoteinase yscE	254	12984	3297936			13250	3365500
YOL042W	NGL1		363	484	175692			499	181137
YOL053W	AIM39	Altered Inheritance rate of Mitochondria	395	281	110995			676	267020
YOL059W	GPD2	Glycerol-3-Phosphate Dehydrogenase	440	12623	5554120			7182	3160080
YOL071W	SDH5	Succinate DeHydrogenase	162	1965	318330			3156	511272
YOL077W-A	ATP19	ATP synthase	68	8122	552296			30727	2089436
YOL081W	IRA2	Inhibitory Regulator of the RAS-cAMP pathway	3079	85	261715			148	455692
YOL095C	HMI1	Helicase in MItochondria	706	0	0			0	0
YOL096C	COQ3	COenzyme Q	312	654	204048			743	231816
YOL114C	PTH4	peptidyl tRNA hydrolase 4	202	0	0			0	0
YOL140W	ARG8	ARGinine requiring	423	17391	7356393			14145	5983335
YOL143C	RIB4	RIBoflavin biosynthesis	169	53581	9055189			59163	9998547
YOR017W	PET127	PETite colonies	800	51	40800			72	57600
YOR020C	HSP10	Heat Shock Protein	106	99861	10585266			106852	11326312
YOR020W-A	MCO10	Mitochondrial Class One protein of 10 kDa	90	853	76770			2788	250920
YOR022C	DDL1	DDHD Domain-containing Lipase	715	50	35750			90	64350
YOR037W	CYC2	CYtochrome C	366	0	0			0	0
YOR040W	GLO4	GLyOxalase	285	1204	343140			2585	736725
YOR045W	TOM6	Translocase of the Outer Mitochondrial membrane	61	5677	346297			4252	259372
YOR056C	NOB1	Nin1 (One) Binding protein	459	1375	631125			870	399330
YOR065W	CYT1	CYTochrome c1	309	10878	3361302			34499	10660191
YOR081C	TGL5	TriacylGlycerol Lipase	749	48	35952			26	19474
YOR090C	PTC5	Phosphatase Two C	572	1123	642356			1564	894608
YOR093C	CMR2	Changed Mutation Rate	1648	18	29664			25	41200
YOR100C	CRC1	CaRnitine Carrier	327	3203	1047381			9393	3071511
YOR108W	LEU9	LEUcine biosynthesis	604	2096	1265984			1097	662588
YOR114W	DPI34	Delta-Psi dependent mitochondrial Import protein of ~34 kDa	294	0	0			0	0
YOR125C	CAT5	CATabolite repression	233	991	230903			796	185468
YOR130C	ORT1	ORnithine Transporter	292	595	173740			308	89936
YOR131C			218	5641	1229738			5376	1171968
YOR136W	IDH2	Isocitrate DeHydrogenase	369	50703	18709407			65545	24186105
YOR142W	LSC1	Ligase of Succinyl-CoA	329	28009	9214961			65946	21696234
YOR147W	MDM32	Mitochondrial Distribution and Morphology	622	0	0			0	0
YOR150W	MRPL23	Mitochondrial Ribosomal Protein, Large subunit	163	2051	334313			3062	499106
YOR158W	PET123	PETite colonies	318	1130	359340			1851	588618
YOR168W	GLN4	GLutamiNe metabolism	809	13678	11065502			10414	8424926
YOR176W	HEM15	HEMe biosynthesis	393	8593	3377049			11302	4441686
YOR187W	TUF1		437	21900	9570300			38393	16777741
YOR196C	LIP5	LIPoic acid	414	918	380052			875	362250
YOR201C	MRM1	Mitochondrial rRNA Methyltransferase	412	0	0			0	0
YOR205C	GEP3	GEnetic interactors of Prohibitins	556	55	30580			122	67832
YOR211C	MGM1	Mitochondrial Genome Maintenance	881	2113	1861553			2070	1823670
YOR215C	AIM41	Altered Inheritance of Mitochondria	185	7702	1424870			30708	5680980
YOR221C	MCT1	Malonyl-CoA:ACP Transferase	360	696	250560			683	245880
YOR222W	ODC2	OxoDicarboxylate Carrier	307	6288	1930416			4474	1373518
YOR226C	ISU2	IscU homolog	156	145	22620			57	8892
YOR228C	MCP1	Mdm10 Complementing Protein	302	0	0			0	0
YOR232W	MGE1	Mitochondrial GrpE	228	15073	3436644			14605	3329940
YOR236W	DFR1	DihydroFolate Reductase	211	499	105289			470	99170
YOR241W	MET7	METhionine requiring	548	16993	9312164			9639	5282172
YOR246C	ENV9	late ENdosome and Vacuole interface function	330	441	145530			200	66000
YOR251C	TUM1	ThioUridine Modification	304	6424	1952896			7954	2418016
YOR266W	PNT1	PeNTamidine resistance	423	297	125631			489	206847
YOR271C	FSF1	Fungal SideroFlexin 1	327	11250	3678750			8923	2917821
YOR274W	MOD5	tRNA MODification	428	629	269212			606	259368
YOR286W	RDL2	RhoDanese-Like protein	149	4974	741126			6638	989062
YOR297C	TIM18	Translocase of the Inner Mitochondrial membrane	192	0	0			0	0
YOR305W	RRG7	Required for Respiratory Growth	242	62	15004			132	31944
YOR330C	MIP1	MItochondrial DNA Polymerase	1254	0	0			0	0
YOR334W	MRS2	Mitochondrial RNA Splicing	470	0	0			0	0
YOR335C	ALA1	ALAnyl-tRNA synthetase	958	27345	26196510			16147	15468826
YOR346W	REV1	REVersionless	985	0	0			0	0
YOR347C	PYK2	PYruvate Kinase	506	15307	7745342			13643	6903358
YOR350C	MNE1		663	3	1989			6	3978
YOR354C	MSC6	Meiotic Sister-Chromatid recombination	692	1251	865692			1971	1363932
YOR356W	CIR2	Changed Intracellular Redox state	631	3120	1968720			6218	3923558
YOR374W	ALD4	ALdehyde Dehydrogenase	519	65605	34048995			1088904	565141176
YPL005W	AEP3	ATPase ExPression	606	0	0			0	0
YPL013C	MRPS16	Mitochondrial Ribosomal Protein, Small subunit	121	679	82159			1478	178838
YPL015C	HST2	Homolog of SIR Two (SIR2)	357	553	197421			399	142443
YPL029W	SUV3	SUppressor of Var1	737	83	61171			80	58960
YPL034W			165	0	0			0	0
YPL040C	ISM1	Isoleucyl tRNA Synthetase of Mitochondria	1002	4240	4248480			11880	11903760
YPL041C	MRX11	Mitochondrial oRganization of gene eXpression (MIOREX)	207	0	0			0	0
YPL059W	GRX5	GlutaRedoXin	150	12541	1881150			17790	2668500
YPL060W	MFM1	Mrs2 Function Modulating factor	413	0	0			0	0
YPL061W	ALD6	ALdehyde Dehydrogenase	500	196889	98444500			123824	61912000
YPL063W	TIM50	Translocase of the Inner Mitochondrial membrane	476	4095	1949220			4055	1930180
YPL069C	BTS1	Bet Two Suppressor	335	35	11725			32	10720
YPL072W	UBP16	UBiquitin-specific Protease	499	136	67864			229	114271
YPL078C	ATP4	ATP synthase	244	10307	2514908			40666	9922504
YPL083C	SEN54	Splicing ENdonuclease	467	0	0			0	0
YPL091W	GLR1	GLutathione Reductase	483	17034	8227422			14368	6939744
YPL097W	MSY1	Mitochondrial aminoacyl-tRNA Synthetase, tyrosine (Y)	492	511	251412			905	445260
YPL098C	MGR2	Mitochondrial Genome Required	113	4373	494149			8171	923323
YPL099C	INA17	INner membrane Assembly 17 kDa	182	121	22022			242	44044
YPL103C	FMP30	Found in Mitochondrial Proteome	468	173	80964			224	104832
YPL104W	MSD1	Mitochondrial aminoacyl-tRNA Synthetase, Aspartate (D)	658	208	136864			364	239512
YPL107W	DPC25	Delta-Psi dependent mitochondrial import and Cleavage protein of ~25 kDa	248	168	41664			367	91016
YPL109C	MCO76	Mitochondrial Class One protein of 76 kDa	657	35	22995			100	65700
YPL118W	MRP51	Mitochondrial Ribosomal Protein	344	987	339528			1436	493984
YPL132W	COX11	Cytochrome c OXidase	300	452	135600			855	256500
YPL134C	ODC1	OxoDicarboxylate Carrier	310	4201	1302310			18029	5588990
YPL135W	ISU1	IScU homolog	165	852	140580			1679	277035
YPL148C	PPT2	Phosphopantetheine:Protein Transferase	173	0	0			0	0
YPL159C	PET20	PETite colonies	253	0	0			0	0
YPL167C	REV3	REVersionless	1504	0	0			0	0
YPL168W	MRX4	Mitochondrial oRganization of gene eXpression (MIOREX)	430	0	0			0	0
YPL172C	COX10	Cytochrome c OXidase	462	0	0			0	0
YPL173W	MRPL40	Mitochondrial Ribosomal Protein, Large subunit	297	2211	656667			3541	1051677
YPL183W-A	RTC6	Restriction of Telomere Capping	93	206	19158			489	45477
YPL188W	POS5	PerOxide Sensitive	414	2326	962964			4152	1718928
YPL189C-A	COA2	Cytochrome Oxidase Assembly	68	0	0			0	0
YPL196W	OXR1	OXidation Resistance	273	698	190554			1388	378924
YPL206C	PGC1	Phosphatidyl Glycerol phospholipase C	321	2820	905220			2312	742152
YPL215W	CBP3	Cytochrome B mRNA Processing	335	2985	999975			2687	900145
YPL222W	FMP40	Found in Mitochondrial Proteome	688	1014	697632			2972	2044736
YPL224C	MMT2	Mitochondrial Metal Transporter	484	273	132132			195	94380
YPL252C	YAH1	Yeast Adrenodoxin Homolog	172	791	136052			551	94772
YPL262W	FUM1	FUMarase	488	18946	9245648			52344	25543872
YPL270W	MDL2	MultiDrug resistance-Like	773	747	577431			1017	786141
YPL271W	ATP15	ATP synthase	62	34843	2160266			137755	8540810
YPR001W	CIT3	CITrate synthase	486	1568	762048			18102	8797572
YPR002W	PDH1	prpD Homolog	516	4454	2298264			28647	14781852
YPR004C	AIM45	Altered Inheritance rate of Mitochondria	344	7714	2653616			8509	2927096
YPR006C	ICL2	IsoCitrate Lyase	575	2375	1365625			23801	13685575
YPR010C-A	MIN8	mitochondrial MINi protein of 8 kDa	72	2464	177408			13017	937224
YPR011C			326	72	23472			90	29340
YPR020W	ATP20	ATP synthase	115	10007	1150805			39888	4587120
YPR021C	AGC1	Aspartate-Glutamate Carrier	902	77	69454			117	105534
YPR024W	YME1	Yeast Mitochondrial Escape	747	2136	1595592			2454	1833138
YPR033C	HTS1	Histidine-Trna Synthetase	546	17233	9409218			10699	5841654
YPR047W	MSF1	Mitochondrial aminoacyl-tRNA Synthetase, Phenylalanine (F)	469	421	197449			667	312823
YPR048W	TAH18	Top1T722A mutant Hypersensitive	623	43	26789			27	16821
YPR058W	YMC1	Yeast Mitochondrial Carrier	307	3401	1044107			3372	1035204
YPR061C	JID1	DnaJ protein Involved in ER-associated Degradation	301	0	0			0	0
YPR067W	ISA2	Iron Sulfur Assembly	185	200	37000			333	61605
YPR080W	TEF1	Translation Elongation Factor	458	1138402	521388116			878623	402409334
YPR083W	MDM36	Mitochondrial Distribution and Morphology	579	105	60795			139	80481
YPR098C	TMH18	TMem205 Homolog of 18 kDa	161	2902	467222			5832	938952
YPR100W	MRPL51	Mitochondrial Ribosomal Protein, Large subunit	140	1104	154560			1646	230440
YPR113W	PIS1	Phosphatidyl Inositol Synthase	220	2867	630740			735	161700
YPR116W	RRG8	Required for Respiratory Growth	277	0	0			0	0
YPR125W	YLH47	Yeast LETM1 Homolog of 47 kD	454	1638	743652			1873	850342
YPR133W-A	TOM5	Translocase of the Outer Mitochondrial membrane	50	15889	794450			18087	904350
YPR134W	MSS18	Mitochondrial Splicing System	268	39	10452			90	24120
YPR140W	TAZ1	TAfaZzin	381	220	83820			173	65913
YPR146C			109	0	0			0	0
YPR151C	SUE1		206	0	0			0	0
YPR155C	NCA2	Nuclear Control of ATPase	616	439	270424			1105	680680
YPR166C	MRP2	Mitochondrial Ribosomal Protein	115	595	68425			951	109365
YPR191W	QCR2	QH2:cytochrome-C oxidoReductase	368	48948	18012864			154636	56906048

## Sheet: Sheet1
F	Gene	Length	Glu	Gal	Gly	HIT?
YNL122C	YNL122C	115	0	0	0	0	#DIV/0!
YHR075C	PPE1	400	19	15	33	0	-0.210526
YKL155C	RSM22	628	193	245	237	0	0.26943
YEL050C	RML2	393	201	395	473	0	0.965174
YPL183W-A	RTC6	93	206	389	489	0	0.88835
YBL038W	MRPL16	232	244	470	605	0	0.92623
YDR115W	MRX14	105	327	1173	2154	0	2.58716
YNL081C	SWS2	143	357	641	648	0	0.795518
YMR225C	MRPL44	98	465	695	742	0	0.494624
YBR122C	MRPL36	177	570	916	968	0	0.607018
YPR166C	MRP2	115	595	1028	951	0	0.727731
Q0140	VAR1	398	607	815	1024	1	0.342669
YNR022C	MRPL50	139	612	984	1255	0	0.607843
YDR237W	MRPL7	292	645	937	964	0	0.452713
YPL013C	MRPS16	121	679	1404	1478	0	1.06775
YBR268W	MRPL37	105	707	1086	1075	0	0.536068
YDR041W	RSM10	203	754	1394	1452	0	0.848806
YDR494W	RSM28	361	813	1235	1539	0	0.519065
YBR282W	MRPL27	146	842	1353	1428	0	0.606888
YDR175C	RSM24	319	844	1426	1421	1	0.689573
YJL096W	MRPL49	161	850	1559	1680	0	0.834118
YER050C	RSM18	138	852	1569	1663	1	0.841549
YGR220C	MRPL9	269	853	1499	1478	0	0.757327
YMR193W	MRPL24	258	920	1393	1577	0	0.51413
YCR003W	MRPL32	183	970	856	889	0	-0.117526
YGR165W	MRPS35	345	975	2433	1813	1	1.49538
YBR146W	MRPS9	278	987	1702	1828	1	0.724417
YPL118W	MRP51	344	987	1330	1436	1	0.347518
YNL177C	MRPL22	309	1054	1454	1606	1	0.379507
YBR251W	MRPS5	307	1075	1698	1826	0	0.579535
YKL167C	MRP49	137	1075	1428	1525	0	0.328372
YPR100W	MRPL51	140	1104	1561	1646	0	0.413949
YOR158W	PET123	318	1130	1679	1851	1	0.485841
YNL252C	MRPL17	281	1147	1973	2134	0	0.720139
YNR037C	RSM19	91	1148	2609	2134	0	1.27265
YBL090W	MRP21	177	1180	2153	2282	0	0.824576
YHL004W	MRP4	394	1204	2176	2042	0	0.807309
YLR439W	MRPL4	319	1229	2263	2834	0	0.841334
YJR101W	RSM26	266	1264	1780	1706	0	0.408228
YHR147C	MRPL6	214	1266	2400	2941	0	0.895735
YKL138C	MRPL31	131	1266	2271	2356	0	0.793839
YDR405W	MRP20	263	1287	2390	2343	0	0.857032
YNR036C	MRPS12	153	1339	2189	2233	0	0.634802
YNL284C	MRPL10	322	1360	1931	2276	0	0.419853
YNL306W	MRPS18	217	1360	1556	1715	0	0.144118
YDR337W	MRPS28	286	1377	2363	2473	1	0.716049
YDL045W-A	MRP10	95	1416	2044	1949	0	0.443503
YGR215W	RSM27	110	1426	1406	2072	0	-0.0140252
YGR076C	MRPL25	157	1443	2754	3445	0	0.908524
YNL137C	NAM9	486	1467	2251	2563	0	0.534424
YMR188C	MRPS17	237	1594	2601	2942	1	0.631744
YDR116C	MRPL1	285	1616	2097	2325	0	0.297649
YIL093C	RSM25	264	1658	2335	2303	1	0.408323
YJR113C	RSM7	247	1796	2783	2796	1	0.549555
YCR071C	IMG2	146	1827	3157	2682	0	0.727969
YML025C	YML6	286	1839	3132	2909	0	0.7031
YKR085C	MRPL20	195	1849	2836	2776	0	0.533802
YKR006C	MRPL13	264	1948	3332	2793	0	0.710472
YDR462W	MRPL28	147	1996	2888	3156	0	0.446894
YDR322W	MRPL35	367	2020	2480	2781	0	0.227723
YOR150W	MRPL23	163	2051	2893	3062	0	0.410531
YDL202W	MRPL11	249	2082	3242	3100	0	0.557157
YNL005C	MRP7	371	2122	3450	3866	0	0.625825
YGL129C	RSM23	450	2127	2263	2800	1	0.0639398
YPL173W	MRPL40	297	2211	3557	3541	0	0.608774
YMR286W	MRPL33	86	2267	3987	3702	0	0.758712
YNL185C	MRPL19	158	2270	3818	3591	0	0.681938
YKL003C	MRP17	131	2310	2597	2627	0	0.124242
YMR024W	MRPL3	390	2411	2809	2968	0	0.165077
YKL170W	MRPL38	138	2416	4735	5465	0	0.959851
YLR312W-A	MRPL15	253	2520	3405	3532	0	0.35119
YGR084C	MRP13	339	2778	2804	4211	0	0.00935925
YDR347W	MRP1	321	3023	3892	4161	1	0.287463
YMR158W	MRPS8	155	3062	4821	4699	0	0.574461
YJL063C	MRPL8	238	3175	4387	4821	0	0.381732
YGL068W	MNP1	194	6897	11342	10395	0	0.644483
YFR049W	YMR31	123	8900	29945	37992	0	2.36461
YCR046C	IMG1	169	9244	5245	3360	0	-0.432605
			ABUNDANCE	#N/A	#N/A
YBL099W	ATP1		78868	278269	299125
YJR121W	ATP2		90560	336865	356034
YKL003C	MRP17		2310	2597	2627
YCR046C	IMG1		9244	5245	3360
YHR005C-A	TIM10		18432	26941	26124
YDR322C-A	TIM11		13424	37127	41242
YER053C	PIC2		2484	3035	4300
YBR085W	AAC3		0	0	0
YJR048W	CYC1		54146	207038	155053
YHR051W	COX6		18309	60651	66753
YLR259C	HSP60		114767	157718	127139
YLR393W	ATP10		649	961	1190
YDL045W-A	MRP10		1416	2044	1949
YCR003W	MRPL32		970	856	889
YER154W	OXA1		1497	1941	1994
