# Supplementary material for: A systematic bi-genomic split-GFP assay illuminates the mitochondrial matrix proteome and protein targeting routes
Source: eLife journal article supplement (doi:10.7554/elife.98889), 2024-07-26
Supplement: fig2-data1 [file NSWAT.xlsx]

## Sheet: All
ORF	Gene	Description	1536 Plate_Row_Col	384 Plate_Row_Col	Primers F+R 96 P_R_C	Tagging type	New NOP1pr-GFP localization	New TEF2pr-mCherry localization	New N' Seamless GFP localization	New Known C' Localization combined	Tef2pr-VC and Cyto-VN localization	General Differences	Number of localizations per cell	Signal peptide?	SP Prediction class	SignalP SP length	Predicted number of TMDs	TMD_1	Generic GfpIntensity(FG)	Native GfpIntensity(FG)	Tef2pr-mCherryIntensity(FG)	Tef2pr-VC and Cyto-VN GFPIntensity(FG)	Generic GFP secretion score	Native GFP secretion score	C' GFP intensity	FACS	Ribosome	Mass Spectroscopy	Raw Half life	mRNA	mRNA half life	Class	Class Perixosome (Einat's list)	Tail Anchored	GPI anchored protein	ER retrieval signals	Palmitolation	farnazylation	Small GTPases	Proxisome - only PTS1 is C'	Go loc.	Go Manual Curated loc.	Go Computational loc.	Go High Troughtput loc.	Inviable deletion phenotype	Overexpression versus deletion phenotypes	Identical flanking DNA stretch [bp]	Human homologues for yeast genes	1536 P#
YAL002W	VPS8	Membrane-binding component of the CORVET complex; involved in endosomal vesicle tethering and fusion in the endosome to vacuole protein targeting pathway; interacts with Vps21p; contains RING finger motif	01_01_01	1A1	12_H_11	SWAT	punctate	punctate	punctate	punctate	below threshold	Same	1	0	0	#N/A	0	None	68.4383	21.1228	49.844	31.9132	#N/A	#N/A	19.55	#N/A	1.4	#N/A	#N/A	22.17	6	0		0	0	0	0	0	0	0	Golgi:endosome	endosome	Golgi	0	#N/A	#N/A	#N/A	ENSG00000156931	01
YEL017W	GTT3	Protein of unknown function may be involved in glutathione metabolism; function suggested by computational analysis of large-scale protein-protein interaction data; N- and C-terminal fusion proteins localize to the cell periphery	01_01_02	2A1	08_H_06	SWAT	nuclear periphery	ER	nuclear periphery	nuclear periphery	nuclear periphery	Same	1	0	0	#N/A	2	238	79.9176	52.4944	134.32	37.0391	#N/A	#N/A	29.66	73.5	39.5	382520000	77	61.48	10.2	0		0	0	0	0	0	0	0	nuclear membrane:nucleus	0	nuclear membrane:nucleus	0	#N/A	#N/A	#N/A	0	01
YBR160W	CDC28	Cyclin-dependent kinase (CDK) catalytic subunit; master regulator of mitotic and meiotic cell cycles; alternately associates with G1, S, G2/M phase cyclins, which provide substrate specificity; regulates metabolism, basal transcription, chromosome dynamics, growth and morphogenesis; transcript induction in osmostress involves antisense RNA; human homologs CDK1, CDK2, CDK3 can complement yeast con…	01_01_03	1A2	13_H_10	SWAT	nucleus	missing	missing	nucleus,cytosol	#N/A	Same	1	0	0	#N/A	0	None	76.4636	0	#N/A	#N/A	#N/A	#N/A	49.71	343	45.5	2452300000	300	67.55	12.9	0		0	0	0	0	0	0	0	bud neck/tip:cytoplasm:endoplasmic reticulum:microtubule:nucleus:spindle pole body	bud neck/tip:cytoplasm:endoplasmic reticulum:microtubule:nucleus:spindle pole body	0	0	inviable	#N/A	#N/A	ENSG00000164885	01
YGL037C	PNC1	Nicotinamidase that converts nicotinamide to nicotinic acid; part of the NAD(+) salvage pathway; required for life span extension by calorie restriction; lacks a peroxisomal targeting signal but is imported into peroxisomes via binding to Gpd1p; PNC1 expression responds to all known stimuli that extend replicative life span; protein increases in abundance and relative distribution to cytoplasmic …	01_01_04	2A2	03_D_01	SWAT	punctate	cytosol	punctate	punctate	cytosol,punctate	Same	1	0	0	#N/A	0	None	177.532	169.61	327.639	66.7083	#N/A	#N/A	143.77	779.5	155.9	9734800000	300	322.4	12.1	Peroxisome	0	0	0	0	0	0	0	0	cytoplasm:nucleus:peroxisome	cytoplasm:nucleus:peroxisome	cytoplasm:nucleus:peroxisome	cytoplasm	#N/A	#N/A	#N/A	0	01
YAL005C	SSA1	ATPase involved in protein folding and NLS-directed nuclear transport; member of HSP70 family; required for ubiquitin-dependent degradation of short-lived proteins; forms chaperone complex with Ydj1p; localized to nucleus, cytoplasm, cell wall; 98% identical to paralog Ssa2p with different functional specificity in propagation of yeast [URE3] prions, vacuolar-mediated degradations of gluconeogene…	01_01_05	1A3	28_C_11	SWAT	cytosol	cytosol	cytosol	cytosol	cytosol	Same	1	0	0	#N/A	0	None	251.515	587.543	218.641	89.1573	#N/A	#N/A	18.27	27461.5	456.8	693000000000	77	#N/A	8.1	0		0	0	0	0	0	0	0	cell periphery:cytoplasm:nucleus:vacuolar membrane	cell periphery:cytoplasm:nucleus:vacuolar membrane	cell periphery:cytoplasm	cell periphery:cytoplasm:nucleus	#N/A	#N/A	#N/A	0	01
YEL020C	PXP1	Peroxisomal matrix protein; well-conserved in fungi; contains tripartite homology domain of thiamine pyrophosphate (TPP) enzymes; targeted to peroxisomes by Pex5p; contains low sequence identity with Pdc1p; mRNA identified as translated by ribosome profiling data	01_01_06	2A3	02_D_11	SWAT	punctate	punctate	punctate	cytosol	punctate	Different	1	0	0	#N/A	0	None	83.3594	21.1214	143.702	27.1387	#N/A	#N/A	24.92	#N/A	3.5	42614000	#N/A	20.13	9.8	Peroxisome	0	0	0	0	0	0	0	1	cytoplasm	0	cytoplasm	cytoplasm	#N/A	#N/A	#N/A	ENSG00000105135	01
YBR161W	CSH1	Mannosylinositol phosphorylceramide (MIPC) synthase catalytic subunit; forms a complex with regulatory subunit Csg2p; function in sphingolipid biosynthesis is overlapping with that of Sur1p; CSH1 has a paralog, SUR1, that arose from the whole genome duplication	01_01_07	1A4	11_H_08	SWAT	below threshold	punctate,vacuole	below threshold	vacuole	below threshold	Same	2	0	0	#N/A	3	7	12.847	21.0998	16.3662	27.6445	#N/A	#N/A	18.93	#N/A	10.1	#N/A	#N/A	31.28	10.9	0		0	0	0	0	0	0	0	vacuolar membrane:vacuole	0	vacuolar membrane:vacuole	vacuole	#N/A	#N/A	#N/A	0	01
YGL038C	OCH1	Mannosyltransferase of the cis-Golgi apparatus; initiates the polymannose outer chain elongation of N-linked oligosaccharides of glycoproteins	01_01_08	2A4	15_F_02	SWAT	punctate	vacuole	punctate	punctate	below threshold	Same	1	0	6	0	1	16	34.1828	31.4369	39.2363	23.6494	#N/A	#N/A	15.22	#N/A	24.4	1088400000	6	47.06	7.9	0		0	0	0	0	0	0	0	Golgi:endoplasmic reticulum	Golgi	Golgi:endoplasmic reticulum	0	#N/A	#N/A	#N/A	0	01
YAL008W	FUN14	Integral mitochondrial outer membrane (MOM) protein; dosage suppressor of an MDM10 null that reduces ERMES-related phenotypes, such as alterations in mitochondrial morphology, protein complex assembly, and lipid profile; dosage suppressor of MDM12, MDM34, and MMM1 null mutant growth defects; novel mechanism of MOM import involving Tom70p, the TOM complex, and the TIM23 complex, requiring mitochon…	01_01_09	1A5	03_B_08	Blank	Blank	Blank	Blank	Remove	Remove	Blank	Remove	Remove	Remove	Remove	Remove	Remove	Remove	Remove	Remove	Remove	Remove	Remove	Remove	Remove	Remove	Remove	Remove	Remove	Remove	Remove	Remove	0	0	Remove	0	0	0	0	Remove	Remove	Remove	Remove	Remove	Remove	Remove	Remove	01
YEL022W	GEA2	Guanine nucleotide exchange factor for ADP ribosylation factors (ARFs); involved in vesicular transport between the Golgi and ER, Golgi organization, and actin cytoskeleton organization; GEA2 has a paralog, GEA1, that arose from the whole genome duplication	01_01_10	2A5	14_G_12	SWAT	punctate	cytosol,punctate	punctate	cytosol,punctate	cytosol	Same	2	0	0	#N/A	1	1062	103.989	35.0588	97.879	51.537	#N/A	#N/A	#N/A	#N/A	13.5	2176100000	16	94.38	6.8	0		0	0	0	0	0	0	0	Golgi:cytoplasm	Golgi	cytoplasm	0	#N/A	1.5	#N/A	ENSG00000107862	01
YBR162W-A	YSY6	Protein of unknown function; expression suppresses a secretory pathway mutation in E. coli; has similarity to the mammalian RAMP4 protein involved in secretion	01_01_11	1A6	03_G_06	SWAT	ER	ER,vacuole	ER	ER	ER	Same	1	0	0	#N/A	1	44	143.662	37.7933	306.16	41.991	#N/A	#N/A	#N/A	59.5	977.9	#N/A	4	#N/A	30.1	Tail Anchored		1	0	0	0	0	0	0	endoplasmic reticulum	0	endoplasmic reticulum	endoplasmic reticulum	#N/A	#N/A	#N/A	0	01
YGL041C-B	YGL041C-B	Putative protein of unknown function; identified by fungal homology and RT-PCR; SWAT-GFP and mCherry fusion proteins localize to the endoplasmic reticulum	01_01_12	2A6	11_H_05	SWAT	ER	vacuole membrane	below threshold	missing	below threshold	New	1	0	0	#N/A	1	15	45.5964	17.2185	29.2085	23.8849	#N/A	#N/A	#N/A	#N/A	0	#N/A	#N/A	#N/A	#N/A	0		0	0	0	0	0	0	0	cellular_component:integral component of membrane:membrane	0	0	0	#N/A	#N/A	#N/A	0	01
YAL009W	SPO7	Putative regulatory subunit of Nem1p-Spo7p phosphatase holoenzyme; regulates nuclear growth by controlling phospholipid biosynthesis, required for normal nuclear envelope morphology, premeiotic replication, and sporulation	01_01_13	1A7	03_E_12	SWAT	ER	ER,vacuole	below threshold	nucleus	below threshold	Different	1	0	0	#N/A	2	73	49.2783	22.5756	34.5168	29.2411	#N/A	#N/A	19.48	#N/A	8.5	#N/A	#N/A	34.96	18.2	0		0	0	0	0	0	0	0	endoplasmic reticulum:nuclear membrane:nucleus	0	endoplasmic reticulum:nuclear membrane:nucleus	0	#N/A	#N/A	#N/A	0	01
YEL025C	YEL025C	Putative protein of unknown function; green fluorescent protein (GFP)-fusion protein localizes to both the cytoplasm and the nucleus	01_01_14	2A7	10_H_07	SWAT	nucleus	nucleus	below threshold	nucleus,cytosol	below threshold	Same	1	0	0	#N/A	0	None	44.2941	20.9015	15.1552	25.7313	#N/A	#N/A	17.37	#N/A	1.3	#N/A	#N/A	34.92	8.4	0		0	0	0	0	0	0	0	cytoplasm:nucleus	0	0	cytoplasm:nucleus	#N/A	#N/A	#N/A	0	01
YBR164C	ARL1	Soluble GTPase with a role in regulation of membrane traffic; regulates potassium influx; role in membrane organization at trans-Golgi network; required for delivery of Atg9p to the phagophore assembly site during autophagy under high temperature stress; required with Ypt6p for starvation-induced autophagy; required for the CVT pathway under non-starvation conditions; G protein of the Ras superfa…	01_01_15	1A8	13_G_10	SWAT	cytosol	cytosol,nucleus	cytosol	punctate,punctate	cytosol	Different	1	0	0	#N/A	0	None	188.011	83.438	298.127	70.0281	#N/A	#N/A	12.69	235	144.1	2418900000	300	156.79	46.4	0		0	0	0	0	0	1	0	Golgi:cytoplasm	Golgi:cytoplasm	Golgi	0	#N/A	#N/A	#N/A	ENSG00000120805	01
YGL045W	RIM8	Protein involved in proteolytic activation of Rim101p; part of response to alkaline pH; interacts with ESCRT-1 subunits Stp22p and Vps28p; essential for anaerobic growth; member of the arrestin-related trafficking adaptor family	01_01_16	2A8	14_B_01	SWAT	cytosol	cytosol	below threshold	below threshold	cytosol,punctate	New	1	0	0	#N/A	0	None	37.4358	21.0702	43.8437	34.8443	#N/A	#N/A	16.53	#N/A	1.7	34641000	15	9.99	10	0		0	0	0	0	0	0	0	cell periphery	cell periphery	0	0	#N/A	#N/A	#N/A	0	01
YAL014C	SYN8	Endosomal SNARE related to mammalian syntaxin 8	01_01_17	1A9	01_D_12	SWAT	punctate	punctate,vacuole	punctate	nucleus,cytosol	punctate	Different	1	0	0	#N/A	1	236	88.1887	22.3677	148.293	45.2018	#N/A	#N/A	#N/A	#N/A	15.5	94451000	#N/A	63.3	14.4	Palmitoylation		0	0	0	1	0	0	0	endosome	endosome	endosome	0	#N/A	#N/A	#N/A	0	01
YEL027W	VMA3	Proteolipid subunit c of the V0 domain of vacuolar H(+)-ATPase; dicyclohexylcarbodiimide binding subunit; required for vacuolar acidification and important for copper and iron metal ion homeostasis	01_01_18	2A9	04_D_08	SWAT	cell periphery	cell periphery,vacuole membrane	below threshold	ER	below threshold	Different	1	0	0	#N/A	4	7	76.4339	18.6433	72.4956	26.5765	#N/A	#N/A	59.63	#N/A	1482.7	#N/A	#N/A	1386.31	49.9	0		0	0	0	0	0	0	0	vacuolar membrane:vacuole	0	vacuolar membrane:vacuole	0	#N/A	3.5	#N/A	ENSG00000185883	01
YBR168W	PEX32	Peroxisomal integral membrane protein; involved in negative regulation of peroxisome size; partially functionally redundant with Pex31p; genetic interactions suggest action at a step downstream of steps mediated by Pex28p and Pex29p	01_01_19	1A10	02_A_08	SWAT	punctate	below threshold	below threshold	punctate	below threshold	Same	1	0	0	#N/A	5	43	30.5407	19.497	9.40677	28.0146	#N/A	#N/A	17.59	#N/A	4.5	#N/A	49	24.55	12.9	Peroxisome	0	0	0	0	0	0	0	0	peroxisome	peroxisome	peroxisome	0	#N/A	#N/A	#N/A	0	01
YGL047W	ALG13	Catalytic component of UDP-GlcNAc transferase; required for the second step of dolichyl-linked oligosaccharide synthesis; anchored to the ER membrane via interaction with Alg14p; similar to bacterial and human glycosyltransferases; protein abundance increases in response to DNA replication stress; both human homologs ALG13 and ALG14 are required to complement yeast alg13 mutant	01_01_20	2A10	13_C_03	SWAT	cytosol	cytosol	ambiguous,ER	ER	cytosol	Different	1	0	0	#N/A	0	None	89.7782	25.1775	123.016	39.3401	#N/A	#N/A	24.26	85.7	19.1	#N/A	300	34.6	26.2	0		0	0	0	0	0	0	0	cytoplasm:endoplasmic reticulum:nucleus	cytoplasm:endoplasmic reticulum	endoplasmic reticulum	cytoplasm:endoplasmic reticulum:nucleus	inviable	#N/A	#N/A	0	01
YAL018C	LDS1	Protein Involved in spore wall assembly; localizes to lipid droplets found on or outside of the prospore membrane; shares similarity with Lds2p and Rrt8p, and a strain mutant for all 3 genes exhibits reduced dityrosine fluorescence relative to the single mutants	01_01_21	1A11	07_C_11	SWAT	punctate	punctate	below threshold	below threshold	punctate	New	1	0	0	#N/A	5	92	112.38	17.2763	195.118	35.1517	#N/A	#N/A	14.66	#N/A	0	#N/A	#N/A	0.15	#N/A	0		0	0	0	0	0	0	0	lipid particle	0	0	lipid particle	#N/A	#N/A	#N/A	0	01
YEL031W	SPF1	P-type ATPase, ion transporter of the ER membrane; required to maintain normal lipid composition of intracellular compartments and proper targeting of mitochondrial outer membrane tail-anchored proteins; involved in ER function and Ca2+ homeostasis; required for regulating Hmg2p degradation; confers sensitivity to a killer toxin (SMKT) produced by Pichia farinosa KK1	01_01_22	2A11	06_E_04	SWAT	ER	ER	ER	ER	ER	Same	1	0	0	#N/A	12	23	133.934	52.3838	188.424	46.0086	#N/A	#N/A	112.44	916.6	65.2	25032000000	300	336.4	10.1	0		0	0	0	0	0	0	0	Golgi:endoplasmic reticulum:mitochondria	Golgi:endoplasmic reticulum	endoplasmic reticulum	mitochondria	#N/A	#N/A	#N/A	ENSG00000105726	01
YBR170C	NPL4	Substrate-recruiting cofactor of the Cdc48p-Npl4p-Ufd1p segregase; assists Cdc48p in the dislocation of misfolded, polyubiquitinated ERAD substrates that are subsequently delivered to the proteasome for degradation; also involved in the regulated destruction of resident ER membrane proteins, such as HMG-CoA reductase (Hmg1/2p) and cytoplasmic proteins (Fbp1p); role in mobilizing membrane bound tr…	01_01_23	1A12	12_H_07	SWAT	cytosol,nucleus	cytosol,nucleus	nucleus	nucleus,cytosol	cytosol	Same	1	0	0	#N/A	0	None	87.609	45.0922	97.9736	45.6942	#N/A	#N/A	41.7	148.5	30	1938000000	29	70.94	8.8	0		0	0	0	0	0	0	0	cytoplasm:endoplasmic reticulum:nuclear membrane:nucleus	endoplasmic reticulum	cytoplasm:endoplasmic reticulum:nuclear membrane:nucleus	cytoplasm:nucleus	#N/A	#N/A	#N/A	ENSG00000182446	01
YGL051W	MST27	Putative integral membrane protein, involved in vesicle formation; forms complex with Mst28p; member of DUP240 gene family; binds COPI and COPII vesicles; MST27 has a paralog, MST28, that arose from a segmental duplication	01_01_24	2A12	14_H_08	SWAT	ER,punctate	ER	below threshold	below threshold	ER,punctate	New	1	0	0	#N/A	2	45	65.3295	17.0954	135.45	35.0478	#N/A	#N/A	17.32	#N/A	0	#N/A	#N/A	#N/A	#N/A	0		0	0	KKxx	0	0	0	0	COPI vesicle:COPII vesicle:Golgi:cell periphery:endoplasmic reticulum	Golgi:cell periphery:endoplasmic reticulum	COPI vesicle:COPII vesicle:Golgi:endoplasmic reticulum	0	#N/A	#N/A	30	0	01
YAL022C	FUN26	High affinity, broad selectivity, nucleoside/nucleobase transporter; vacuolar membrane localized transporter which may regulate the balance of nicotinamide riboside (NmR) levels between the cytosol and vacuole, contributing to salvage of NmR for use in cytosolic NAD+ synthesis; equilibrative nucleoside transporter (ENT) family member	01_01_25	1A13	05_H_10	SWAT	punctate,vacuole membrane	punctate,vacuole membrane	punctate,vacuole membrane	missing	punctate,vacuole membrane	New	2	0	0	#N/A	11	76	80.729	29.1808	96.6356	44.9841	#N/A	#N/A	#N/A	#N/A	14.5	4753700	3	61.02	11.5	0		0	0	0	0	0	0	0	vacuolar membrane	vacuolar membrane	0	vacuolar membrane	#N/A	3	#N/A	0	01
YEL033W	MTC7	Protein of unknown function; predicted metabolic role based on network analysis derived from ChIP experiments, a large-scale deletion study and localization of transcription factor binding sites; null mutant is sensitive to temperature oscillation in a cdc13-1 mutant	01_01_26	2A13	04_A_01	SWAT	below threshold	missing	below threshold	cytosol	below threshold	C terminal	1	0	0	#N/A	3	15	14.8474	13.2183	#N/A	24.5699	#N/A	#N/A	20.16	#N/A	14.7	#N/A	#N/A	#N/A	13.7	0		0	0	0	0	0	0	0	cellular_component:integral component of membrane:membrane	0	0	0	#N/A	#N/A	#N/A	0	01
YBR171W	SEC66	Non-essential subunit of Sec63 complex; with Sec61 complex, Kar2p/BiP and Lhs1p forms a channel competent for SRP-dependent and post-translational SRP-independent protein targeting and import into the ER; other members are Sec63p, Sec62p, and Sec72p	01_01_27	1A14	28_F_5	SWAT	ER,punctate	ER,punctate	ER	ER	below threshold	Same	3	0	0	#N/A	1	28	63.2593	51.3937	44.1934	27.7502	#N/A	#N/A	66.49	463.5	158.8	556970000	300	144.06	15.1	0		0	0	0	0	0	0	0	endoplasmic reticulum	endoplasmic reticulum	endoplasmic reticulum	0	#N/A	#N/A	#N/A	0	01
YGL053W	PRM8	Pheromone-regulated protein; contains with 2 predicted transmembrane segments and an FF sequence, a motif involved in COPII binding; forms a complex with Prp9p in the ER; member of DUP240 gene family; PRM8 has a paralog, PRM9, that arose from a segmental duplication	01_01_28	2A14	14_A_05	SWAT	ER,punctate	ER,punctate	below threshold	ambiguous	ER,punctate	New	1	0	0	#N/A	2	51	83.554	15.9916	206.959	38.5317	#N/A	#N/A	18.34	#N/A	5.8	#N/A	79	#N/A	18.7	0		0	0	0	0	0	0	0	cell periphery:endoplasmic reticulum	cell periphery:endoplasmic reticulum	endoplasmic reticulum	0	#N/A	#N/A	18	0	01
YAL023C	PMT2	Protein O-mannosyltransferase of the ER membrane; transfers mannose residues from dolichyl phosphate-D-mannose to protein serine/threonine residues; involved in ER quality control; acts in a complex with Pmt1p, can instead interact with Pmt5p; antifungal drug target; PMT2 has a paralog, PMT3, that arose from the whole genome duplication	01_01_29	1A15	04_D_04	SWAT	ER	ER	below threshold	ER	ER	Same	1	0	0	#N/A	10	59	149.063	22.0207	132.693	50.0761	#N/A	#N/A	24.45	58.9	68.6	1407600000	61	342.36	9.6	0		0	0	0	0	0	0	0	endoplasmic reticulum	0	endoplasmic reticulum	0	#N/A	#N/A	#N/A	ENSG00000009830	01
YEL036C	ANP1	Subunit of the alpha-1,6 mannosyltransferase complex; type II membrane protein; has a role in retention of glycosyltransferases in the Golgi; involved in osmotic sensitivity and resistance to aminonitrophenyl propanediol	01_01_30	2A15	04_H_05	SWAT	punctate	punctate	punctate	punctate	below threshold	Same	1	0	0	#N/A	1	21	60.0382	26.7033	38.8033	27.0057	#N/A	#N/A	25.47	#N/A	23.5	1639400000	#N/A	79.24	8.9	0		0	0	0	0	0	0	0	Golgi:endoplasmic reticulum	Golgi	Golgi:endoplasmic reticulum	0	#N/A	3	#N/A	0	01
YBR172C	SMY2	GYF domain protein; involved in COPII vesicle formation; interacts with the Sec23p/Sec24p subcomplex; overexpression suppresses the temperature sensitivity of a myo2 mutant; similar to S. pombe Mpd2; SMY2 has a paralog, SYH1, that arose from the whole genome duplication	01_01_31	1A16	15_H_11	SWAT	cytosol	cytosol	cytosol	cytosol	cytosol,punctate	Same	1	0	0	#N/A	0	None	53.3872	33.1461	43.4604	43.6748	#N/A	#N/A	51.27	#N/A	19.2	2057200000	19	60.32	5.6	0		0	0	0	0	0	0	0	P-body:cytoplasm:endoplasmic reticulum	P-body:endoplasmic reticulum	cytoplasm	cytoplasm	#N/A	3	#N/A	0	01
YGL054C	ERV14	COPII-coated vesicle protein; involved in vesicle formation and incorporation of specific secretory cargo; required for the delivery of bud-site selection protein Axl2p and Nha1p antiporter to cell surface; related to Drosophila cornichon; ERV14 has a paralog, ERV15, that arose from the whole genome duplication	01_01_32	2A16	15_E_05	SWAT	cell periphery,ER,punctate	ER,vacuole	ER,vacuole	ER,vacuole	below threshold	Same	3	0	6	0	2	57	72.602	62.6612	151.484	24.3972	#N/A	#N/A	102.61	683.5	381.3	379270000	40	323.82	184	Bearing Signal Sequence		0	0	0	0	0	0	0	COPII vesicle:Golgi:endoplasmic reticulum	COPII vesicle:endoplasmic reticulum	Golgi:endoplasmic reticulum	0	#N/A	#N/A	#N/A	ENSG00000143771	01
YAL026C	DRS2	Trans-golgi network aminophospholipid translocase (flippase); maintains membrane lipid asymmetry in post-Golgi secretory vesicles; contributes to clathrin-coated vesicle formation, endocytosis, protein trafficking between the Golgi and endosomal system and the cellular response to mating pheromone; autoinhibited by its C-terminal tail; localizes to the trans-Golgi network; mutations in human homo…	01_01_33	1A17	04_C_07	SWAT	ER,punctate	ER	punctate	punctate,punctate	ER,punctate	Same	2	0	0	#N/A	9	410	87.2838	29.2221	94.0487	40.8051	#N/A	#N/A	35.98	113.3	10.2	1445500000	20	74.53	9.5	0		0	0	0	0	0	0	0	Golgi	Golgi	Golgi	0	#N/A	#N/A	#N/A	ENSG00000068650	01
YEL048C	TCA17	Component of transport protein particle (TRAPP) complex II; TRAPPII is a multimeric guanine nucleotide-exchange factor for the GTPase Ypt1p, regulating intra-Golgi and endosome-Golgi traffic; promotes association of TRAPPII-specific subunits with the TRAPP core complex; sedlin related; human Sedlin mutations cause SEDT, a skeletal disorder	01_01_34	2A17	13_A_03	SWAT	cytosol,punctate	cytosol	punctate	punctate	cytosol	Different	1	0	0	#N/A	0	None	75.5283	36.5454	148.473	39.2177	#N/A	#N/A	33.51	#N/A	56.7	#N/A	607	52.45	75.9	0		0	0	0	0	0	0	0	Golgi:endosome	Golgi	Golgi	endosome	#N/A	#N/A	#N/A	0	01
YBR183W	YPC1	Alkaline ceramidase; also has reverse (CoA-independent) ceramide synthase activity; catalyzes both breakdown and synthesis of phytoceramide; overexpression confers fumonisin B1 resistance; YPC1 has a paralog, YDC1, that arose from the whole genome duplication	01_01_35	1A18	03_F_08	SWAT	ER	ER	below threshold	below threshold	below threshold	New	1	0	0	#N/A	6	69	35.3916	19.9411	11.7372	27.6952	#N/A	#N/A	14.1	#N/A	2.2	#N/A	#N/A	30.84	12	0		0	0	KKxx	0	0	0	0	Golgi:endoplasmic reticulum	endoplasmic reticulum	Golgi:endoplasmic reticulum	0	#N/A	#N/A	#N/A	ENSG00000078124	01
YGL055W	OLE1	Delta(9) fatty acid desaturase; required for monounsaturated fatty acid synthesis and for normal distribution of mitochondria	01_01_36	2A18	07_D_12	SWAT	ER	ER	below threshold	ER	ER	Same	1	0	0	#N/A	4	113	86.7219	21.777	159.501	40.1923	#N/A	#N/A	118.34	343.5	148.8	10381000000	193	376.73	35.5	0		0	0	0	0	0	0	0	endoplasmic reticulum	endoplasmic reticulum	endoplasmic reticulum	0	inviable	#N/A	#N/A	ENSG00000099194	01
YAL028W	FRT2	Tail-anchored ER membrane protein of unknown function; interacts with homolog Frt1p; promotes growth in conditions of high Na+, alkaline pH, or cell wall stress, possibly via a role in posttranslational translocation; potential Cdc28p substrate; FRT2 has a paralog, FRT1, that arose from the whole genome duplication	01_01_37	1A19	03_E_05	SWAT	ambiguous,ER	vacuole	below threshold	missing	below threshold	New	1	0	0	#N/A	1	505	33.7927	15.2517	18.9032	27.6859	#N/A	#N/A	#N/A	#N/A	1.3	#N/A	#N/A	8.11	9.9	Tail Anchored		1	0	0	0	0	0	0	endoplasmic reticulum	endoplasmic reticulum	endoplasmic reticulum	0	#N/A	#N/A	#N/A	0	01
YEL051W	VMA8	Subunit D of the V1 peripheral membrane domain of V-ATPase; part of the electrogenic proton pump found throughout the endomembrane system; plays a role in the coupling of proton transport and ATP hydrolysis; the V1 peripheral membrane domain of the vacuolar H+-ATPase (V-ATPase) has eight subunits	01_01_38	2A19	13_B_11	SWAT	below threshold	below threshold	below threshold	vacuole membrane	#N/A	Same	1	0	0	#N/A	0	None	58.7086	16.4722	0	24.2489	#N/A	#N/A	95.5	720.5	374	2954000000	#N/A	500.8	31.4	0		0	0	0	0	0	0	0	vacuolar membrane	vacuolar membrane	0	0	#N/A	#N/A	13	ENSG00000100554	01
YBR199W	KTR4	Glycosyltransferase involved in protein glycosylation; transfers GDP-mannose to methyl-alpha-mannoside in vitro; member of the KRE2/MNT1 mannosyltransferase family of type II membrane proteins with a short cytoplasmic N-terminus, a membrane-spanning region and a highly conserved catalytic lumenal domain	01_01_39	1A20	08_B_10	SWAT	punctate,vacuole membrane	vacuole membrane	vacuole membrane	vacuole	below threshold	Same	1	0	0	#N/A	1	12	64.3511	38.6405	102.905	26.9885	#N/A	#N/A	19.89	#N/A	52.6	1589500000	12	130.67	10.7	0		0	0	0	0	0	0	0	Golgi	Golgi	0	0	#N/A	#N/A	#N/A	0	01
YGL065C	ALG2	Mannosyltransferase in the N-linked glycosylation pathway; catalyzes two consecutive steps in the N-linked glycosylation pathway; alg2 mutants exhibit temperature-sensitive growth and abnormal accumulation of the lipid-linked oligosaccharide Man2GlcNAc2-PP-Dol; human ALG2 complements the temperature sensitivity and dolichol-linked oligosaccharide biosynthesis defect of the alg2-1 mutant, but muta…	01_01_40	2A20	08_H_02	SWAT	ER	ER	ER	ER	ER	Same	1	0	0	#N/A	3	73	83.7657	34.5521	136.929	38.7118	#N/A	#N/A	16.08	#N/A	17.7	479100000	20	56.45	8.7	0		0	0	0	0	0	0	0	endoplasmic reticulum	endoplasmic reticulum	endoplasmic reticulum	0	inviable	#N/A	#N/A	ENSG00000119523	01
YAL030W	SNC1	Vesicle membrane receptor protein (v-SNARE); involved in the fusion between Golgi-derived secretory vesicles with the plasma membrane; proposed to be involved in endocytosis; member of the synaptobrevin/VAMP family of R-type v-SNARE proteins; SNC1 has a paralog, SNC2, that arose from the whole genome duplication	01_01_41	1A21	01_G_12	SWAT	punctate,bud	cell periphery,vacuole,bud	bud	missing	bud	New	2	0	0	#N/A	1	95	98.2949	24.9122	164.718	41.5201	#N/A	#N/A	#N/A	#N/A	71.4	1391300000	#N/A	127.45	35.9	Palmitoylation		0	0	0	1	0	0	0	Golgi:bud neck/tip:cell periphery:endosome	Golgi:bud neck/tip:cell periphery:endosome	0	0	#N/A	2	#N/A	ENSG00000117533	01
YEL063C	CAN1	Plasma membrane arginine permease; requires phosphatidyl ethanolamine (PE) for localization, exclusively associated with lipid rafts; mutation confers canavanine resistance; CAN1 has a paralog, ALP1, that arose from the whole genome duplication	01_01_42	2A21	06_C_04	SWAT	ER	below threshold	below threshold	cell periphery,vacuole	#N/A	Different	1	0	0	#N/A	12	93	69.4808	20.1931	#N/A	#N/A	#N/A	#N/A	#N/A	1008.5	37.6	632790000	29	96.68	7.6	0		0	0	0	0	0	0	0	cell periphery:endosome:mitochondria	cell periphery	cell periphery:endosome	mitochondria	#N/A	#N/A	#N/A	0	01
YBR201C-A	YBR201C-A	Putative protein of unknown function	01_01_43	1A22	12_E_06	SWAT	below threshold	below threshold	below threshold	missing	#N/A	0	0	0	0	#N/A	1	25	21.4918	16.673	4.96389	25.7319	#N/A	#N/A	#N/A	#N/A	21	#N/A	#N/A	#N/A	6.9	0		0	0	0	0	0	0	0	cellular_component	0	0	0	#N/A	#N/A	#N/A	0	01
YGL067W	NPY1	NADH diphosphatase (pyrophosphatase); hydrolyzes the pyrophosphate linkage in NADH and related nucleotides; localizes to peroxisomes; nudix hydrolase family member	01_01_44	2A22	03_B_03	SWAT	cytosol,punctate	cytosol,punctate	cytosol,punctate	nucleus,cytosol	cytosol,punctate	Same	2	0	0	#N/A	0	None	113.903	30.4488	278.39	49.602	#N/A	#N/A	#N/A	85	30.4	547140000	20	69.72	19.9	Peroxisome	predicted PTS1 (by Peroxisome DB)	0	0	0	0	0	0	1	cytoplasm:peroxisome	peroxisome	0	cytoplasm	#N/A	#N/A	#N/A	ENSG00000112874	01
YAL035W	FUN12	Translation initiation factor eIF5B; GTPase that promotes Met-tRNAiMet binding to ribosomes and ribosomal subunit joining; promotes GTP-dependent maturation of 18S rRNA by Nob1p; protein abundance increases in response to DNA replication stress; homolog of bacterial IF2	01_01_45	1A23	16_E_01	SWAT	cytosol	cytosol	cytosol	cytosol	cytosol	Same	1	0	0	#N/A	0	None	228.864	160.501	174.84	73.2946	#N/A	#N/A	282.66	1874	231.4	26310000000	321	403.98	#N/A	0		0	0	0	0	0	1	0	cytoplasm:mitochondria	0	0	cytoplasm:mitochondria	#N/A	#N/A	#N/A	ENSG00000158417	01
YEL064C	AVT2	Putative transporter; member of a family of seven S. cerevisiae genes (AVT1-7) related to vesicular GABA-glycine transporters	01_01_46	2A23	04_C_10	SWAT	missing	below threshold	below threshold	missing	below threshold	New	1	0	0	#N/A	9	71	0	19.8385	#N/A	32.0473	#N/A	#N/A	#N/A	#N/A	8.2	#N/A	#N/A	15.07	14.4	0		0	0	0	0	0	0	0	endoplasmic reticulum:vacuolar membrane:vacuole	endoplasmic reticulum	vacuolar membrane:vacuole	0	#N/A	1.5	#N/A	ENSG00000139974	01
YBR201W	DER1	ER membrane protein that promotes export of misfolded polypeptides; required for ER-associated protein degradation of misfolded or unassembled proteins; initiates export of aberrant polypeptides from ER lumen by threading them into ER membrane and routing them to Hrd1p for ubiquitination; function normally requires N-terminal acetylation by NatB; N- and C- termini protrude into cytoplasm; similar…	01_01_47	1A24	08_E_02	SWAT	below threshold	below threshold	below threshold	below threshold	#N/A	0	0	0	0	#N/A	4	16	19.8227	19.5335	4.66838	25.9705	#N/A	#N/A	16.5	#N/A	16.5	#N/A	3	28.92	16.8	0		0	0	0	0	0	0	0	endoplasmic reticulum	endoplasmic reticulum	endoplasmic reticulum	0	#N/A	#N/A	#N/A	0	01
YGL075C	MPS2	Essential membrane protein localized at nuclear envelope and SPBs; required for insertion of the newly duplicated spindle pole body into the nuclear envelope; potentially phosphorylated by Cdc28p; MPS2 has a paralog, CSM4, that arose from the whole genome duplication	01_01_48	2A24	14_G_03	SWAT	missing	ER,punctate,vacuole	punctate	punctate	below threshold	Same	2	0	0	#N/A	1	305	0	22.2926	34.2657	28.2849	#N/A	#N/A	#N/A	#N/A	6.8	#N/A	#N/A	16.53	7.4	0		0	0	0	0	0	0	0	cytoplasm:cytoskeleton:nuclear membrane:nucleus:spindle pole body	nuclear membrane:spindle pole body	cytoplasm:cytoskeleton:nuclear membrane:nucleus:spindle pole body	0	inviable	1	#N/A	0	01
YJL123C	MTC1	Protein of unknown function that may interact with ribosomes; green fluorescent protein (GFP)-fusion protein localizes to the cytoplasm and to COPI-coated vesicles (early Golgi); mtc1 is synthetically lethal with cdc13-1	01_02_01	3A1	12_A_08	SWAT	punctate	punctate	punctate	cytosol,punctate,punctate	cytosol,punctate	Same	1	0	0	#N/A	0	None	84.9609	56.2329	129.51	58.3127	#N/A	#N/A	60.2	252.5	72.4	12872000000	57	96.16	8.9	0		0	0	0	0	0	0	0	COPI vesicle:Golgi:cytoplasm	0	COPI vesicle:cytoplasm	COPI vesicle:Golgi:cytoplasm	inviable	1	#N/A	0	01
YMR264W	CUE1	Ubiquitin-binding protein; ER membrane protein that recruits and integrates the ubiquitin-conjugating enzyme Ubc7p into ER membrane-bound ubiquitin ligase complexes that function in the ER-associated degradation (ERAD) pathway for misfolded proteins; contains a CUE domain that binds ubiquitin to facilitate intramolecular monoubiquitination and to promote diubiquitin elongation, facilitating polyu…	01_02_02	4A1	12_E_12	SWAT	cell periphery,punctate,nucleus	ER,punctate	below threshold	ER,cytosol	#N/A	Same	2	0	0	#N/A	1	6	75.1406	20.0994	31.8174	0	#N/A	#N/A	13.76	#N/A	59.3	799670000	25	129.7	31.7	0		0	0	0	0	0	0	0	endoplasmic reticulum:mitochondria	endoplasmic reticulum	endoplasmic reticulum	mitochondria	#N/A	#N/A	#N/A	0	01
YKL146W	AVT3	Vacuolar transporter; exports large neutral amino acids from the vacuole; member of a family of seven S. cerevisiae genes (AVT1-7) related to vesicular GABA-glycine transporters	01_02_03	3A2	06_G_05	SWAT	vacuole membrane	vacuole membrane	vacuole membrane	ER	vacuole membrane	Different	1	0	0	#N/A	11	302	48.0321	22.7064	73.7957	40.4238	#N/A	#N/A	19.84	66.5	13.4	47275000	#N/A	43.03	#N/A	0		0	0	0	0	0	0	0	vacuolar membrane:vacuole	vacuolar membrane	vacuolar membrane:vacuole	0	#N/A	2.5	#N/A	ENSG00000123643	01
YNL321W	VNX1	Calcium/H+ antiporter localized to the endoplasmic reticulum membrane; member of the calcium exchanger (CAX) family; potential Cdc28p substrate	01_02_04	4A2	05_G_02	SWAT	vacuole membrane	vacuole membrane	ambiguous	below threshold	vacuole membrane	New	1	0	0	#N/A	13	242	47.8447	15.9438	43.0199	39.3584	#N/A	#N/A	19.49	#N/A	5.8	310970000	#N/A	47.1	7.6	0		0	0	0	0	0	0	0	endoplasmic reticulum:vacuolar membrane:vacuole	endoplasmic reticulum:vacuolar membrane:vacuole	vacuolar membrane:vacuole	0	#N/A	#N/A	#N/A	0	01
YJL127C-B	YJL127C-B	Putative protein of unknown function; identified based on homology to the filamentous fungus, <i>Ashbya gossypii</i>; SWAT-GFP and seamless-GFP fusion proteins localize to the mitochondria	01_02_05	3A3	14_E_09	SWAT	punctate,mitochondria	below threshold	punctate,mitochondria	missing	#N/A	New	2	0	0	#N/A	1	28	14.8122	16.0564	5.33675	23.9935	#N/A	#N/A	#N/A	#N/A	136.7	#N/A	#N/A	#N/A	25.5	0		0	0	0	0	0	0	0	cellular_component:integral component of membrane:membrane	0	0	0	#N/A	#N/A	#N/A	0	01
YMR266W	RSN1	Membrane protein of unknown function; overexpression suppresses NaCl sensitivity of sro7 mutant cells by restoring sodium pump (Ena1p) localization to the plasma membrane	01_02_06	4A3	05_A_12	SWAT	cell periphery,ER	ER	punctate	cell periphery	below threshold	Same	2	0	0	#N/A	10	27	55.229	22.6166	23.9211	24.427	#N/A	#N/A	46.8	200.8	29.3	1868400000	42	117.9	10.9	0		0	0	0	0	0	0	0	vacuolar membrane	0	0	vacuolar membrane	#N/A	3	#N/A	0	01
YKL157W	APE2	Aminopeptidase yscII; may have a role in obtaining leucine from dipeptide substrates; APE2 has a paralog, AAP1, that arose from the whole genome duplication	01_02_07	3A4	10_D_02	Blank	Blank	Blank	Blank	Remove	Remove	Blank	Remove	Remove	Remove	Remove	Remove	Remove	Remove	Remove	Remove	Remove	Remove	Remove	Remove	Remove	Remove	Remove	Remove	Remove	Remove	Remove	Remove	0	0	Remove	0	0	0	0	Remove	Remove	Remove	Remove	Remove	Remove	Remove	Remove	01
YNL323W	LEM3	Membrane protein of the plasma membrane and ER; interacts specifically in vivo with the phospholipid translocase (flippase) Dnf1p; involved in translocation of phospholipids and alkylphosphocholine drugs across the plasma membrane; null mutant requires tryptophan due to mislocalization of tryptophan permease Tat2p	01_02_08	4A4	08_A_08	SWAT	ER	vacuole	punctate,bud neck	ER	punctate	Same	1	0	0	#N/A	2	76	84.1242	28.7993	92.094	34.79	#N/A	#N/A	36.87	179.5	39.6	1432200000	17	91.89	13.9	0		0	0	0	0	0	0	0	cell periphery:cytoplasm:endoplasmic reticulum	cell periphery:endoplasmic reticulum	cell periphery	cytoplasm	#N/A	#N/A	#N/A	ENSG00000112697	01
YJL129C	TRK1	Component of the Trk1p-Trk2p potassium transport system; 180 kDa high affinity potassium transporter; phosphorylated in vivo and interacts physically with the phosphatase Ppz1p, suggesting Trk1p acitivy is regulated by phosphorylation; TRK1 has a paralog, TRK2, that arose from the whole genome duplication	01_02_09	3A5	06_G_11	SWAT	cell periphery,punctate	cell periphery,punctate	below threshold	below threshold	below threshold	New	2	0	0	#N/A	10	52	24.4585	18.5558	23.4926	28.111	#N/A	#N/A	18.4	#N/A	2.7	#N/A	#N/A	48.66	6.4	0		0	0	0	0	0	0	0	cell periphery	cell periphery	0	0	#N/A	#N/A	#N/A	0	01
YMR272C	SCS7	Sphingolipid alpha-hydroxylase; functions in the alpha-hydroxylation of sphingolipid-associated very long chain fatty acids, has both cytochrome b5-like and hydroxylase/desaturase domains, not essential for growth	01_02_10	4A5	13_F_03	SWAT	ER	ER	ER	ER	ER	Same	1	0	0	#N/A	4	197	65.315	34.3883	46.2568	39.9419	#N/A	#N/A	15.32	243.5	67.7	5159300000	77	94.58	13.8	0		0	0	KxKxx	0	0	0	0	endoplasmic reticulum	0	endoplasmic reticulum	endoplasmic reticulum	#N/A	#N/A	#N/A	ENSG00000103089	01
YKL165C	MCD4	Protein involved in GPI anchor synthesis; multimembrane-spanning protein that localizes to the endoplasmic reticulum; highly conserved among eukaryotes; GPI stands for glycosylphosphatidylinositol	01_02_11	3A6	05_D_01	SWAT	ER	ER	ER	vacuole	ER	Different	1	0	0	#N/A	14	7	87.5382	33.2328	92.9358	35.309	#N/A	#N/A	#N/A	139.4	12.6	700410000	657	68.23	21.7	0		0	0	KKxx	0	0	0	0	Golgi:cell periphery:endoplasmic reticulum:vacuolar membrane:vacuole	cell periphery:endoplasmic reticulum:vacuole	Golgi:endoplasmic reticulum:vacuolar membrane:vacuole	0	inviable	#N/A	#N/A	ENSG00000197563	01
YNL326C	PFA3	Palmitoyltransferase for Vac8p; required for vacuolar membrane fusion; contains an Asp-His-His-Cys-cysteine rich (DHHC-CRD) domain; autoacylates; required for vacuolar integrity under stress conditions	01_02_12	4A6	08_G_01	SWAT	vacuole membrane	vacuole	below threshold	vacuole	below threshold	Same	1	0	0	#N/A	4	7	45.9588	21.5247	52.1603	25.6073	#N/A	#N/A	18.92	#N/A	5.9	#N/A	33	31.93	20.2	0		0	0	0	0	0	0	0	vacuolar membrane:vacuole	vacuolar membrane:vacuole	vacuolar membrane:vacuole	vacuole	#N/A	#N/A	#N/A	ENSG00000180776	01
YJL134W	LCB3	Long-chain base-1-phosphate phosphatase; specific for dihydrosphingosine-1-phosphate, regulates ceramide and long-chain base phosphates levels, involved in incorporation of exogenous long chain bases in sphingolipids; LCB3 has a paralog, YSR3, that arose from the whole genome duplication	01_02_13	3A7	07_D_06	SWAT	ER	ER	ER	ER	#N/A	Same	1	0	0	#N/A	7	81	65.0456	36.0986	96.1046	#N/A	#N/A	#N/A	19.32	#N/A	17.5	#N/A	12	54.15	13.1	0		0	0	0	0	0	0	0	endoplasmic reticulum	endoplasmic reticulum	endoplasmic reticulum	0	#N/A	#N/A	#N/A	ENSG00000126821	01
YMR274C	RCE1	Type II CAAX prenyl protease; involved in the proteolysis and maturation of Ras and the a-factor mating pheromone	01_02_14	4A7	15_C_06	SWAT	ER	ER	below threshold	missing	below threshold	New	1	0	6	20	9	6	33.7449	16.2071	20.8124	24.1896	#N/A	#N/A	#N/A	#N/A	6.4	#N/A	#N/A	18.59	10.9	0		0	0	0	0	0	0	0	endoplasmic reticulum	endoplasmic reticulum	endoplasmic reticulum	0	#N/A	#N/A	#N/A	ENSG00000173653	01
YKL173W	SNU114	GTPase component of U5 snRNP involved in mRNA splicing via spliceosome; binds directly to U5 snRNA; proposed to be involved in conformational changes of the spliceosome; similarity to ribosomal translocation factor EF-2	01_02_15	3A8	16_E_03	SWAT	cytosol,nucleus	nucleus	nucleus	nucleus	cytosol,nucleus	Same	1	0	0	#N/A	0	None	52.5443	28.566	56.1257	35.2691	#N/A	#N/A	34.47	#N/A	10.1	787740000	52	39.01	6.9	0		0	0	0	0	0	1	0	nucleus	0	nucleus	0	inviable	#N/A	#N/A	0	01
YNL329C	PEX6	AAA-peroxin; heterodimerizes with AAA-peroxin Pex1p and participates in the recycling of peroxisomal signal receptor Pex5p from the peroxisomal membrane to the cystosol; mutations in human PEX6 can lead to severe peroxisomal disorders and early death	01_02_16	4A8	02_F_06	SWAT	cytosol,punctate	punctate	punctate	punctate	below threshold	Same	1	0	3	0	0	None	57.0047	17.5806	27.9657	29.3666	#N/A	#N/A	21.82	85.8	2	133210000	44	36.07	5.9	Peroxisome	Pex19 signal (by Peroxisomes DB)	0	0	0	0	0	0	0	cytoplasm:peroxisome	cytoplasm:peroxisome	cytoplasm:peroxisome	0	#N/A	#N/A	#N/A	ENSG00000124587	01
YJL139C	YUR1	Mannosyltransferase involved in protein N-glycosylation; member of the KTR1 family; located in the Golgi apparatus; YUR1 has a paralog, KTR2, that arose from the whole genome duplication	01_02_17	3A9	14_H_07	SWAT	ER	ER	below threshold	below threshold	below threshold	New	1	0	0	#N/A	1	6	26.2689	17.3449	17.6299	24.1881	#N/A	#N/A	14.28	#N/A	6.2	21865000	15	25.99	10.8	0		0	0	0	0	0	0	0	Golgi	Golgi	Golgi	0	#N/A	#N/A	#N/A	0	01
YMR279C	YMR279C	Putative boron transporter involved in boron efflux and resistance; overexpression mutant but not null mutant displays boron tolerance phenotype; identified as a heat-induced gene in a high-throughout screen; YMR279C is not an essential gene; YMR279C has a paralog, ATR1, that arose from the whole genome duplication	01_02_18	4A9	05_A_03	SWAT	cell periphery,vacuole	cell periphery,vacuole	below threshold	below threshold	below threshold	New	1	0	0	#N/A	14	70	53.4734	19.9294	75.2138	29.0165	#N/A	#N/A	17.09	#N/A	0.2	#N/A	#N/A	1.09	8.1	0		0	0	0	0	0	0	0	integral component of membrane:membrane	0	0	0	#N/A	#N/A	#N/A	0	01
YKL174C	TPO5	Protein involved in excretion of putrescine and spermidine; putative polyamine transporter in the Golgi or post-Golgi vesicles	01_02_19	3A10	05_C_04	SWAT	ER	ER	below threshold	missing	below threshold	New	1	0	0	#N/A	12	61	53.6187	23.8203	59.6084	32.0285	#N/A	#N/A	#N/A	#N/A	10.1	625810000	#N/A	41.57	7.7	0		0	0	0	0	0	0	0	Golgi	Golgi	Golgi	0	#N/A	#N/A	#N/A	0	01
YNL336W	COS1	Endosomal protein involved in turnover of plasma membrane proteins; member of the DUP380 subfamily of conserved, often subtelomeric COS genes; required for the multivesicular vesicle body sorting pathway that internalizes plasma membrane proteins for degradation; Cos proteins provide ubiquitin in trans for nonubiquitinated cargo proteins	01_02_20	4A10	07_B_12	SWAT	vacuole	vacuole	below threshold	vacuole	below threshold	Same	1	0	0	#N/A	4	47	46.7143	19.7049	49.527	24.7292	#N/A	#N/A	27.27	153.5	2	#N/A	58	#N/A	10.8	0		0	0	0	0	0	0	0	vacuolar membrane:vacuole	0	0	vacuolar membrane:vacuole	#N/A	#N/A	#N/A	0	01
YJL145W	SFH5	Non-classical phosphatidylinositol transfer protein (PITP); exhibits PI- but not PC-transfer activity; localizes to the peripheral endoplasmic reticulum, cytosol and microsomes; similar to Sec14p; partially relocalizes to the plasma membrane upon DNA replication stress	01_02_21	3A11	15_D_10	SWAT	cell periphery,punctate	cytosol,bud neck	punctate,mitochondria	cytosol	cytosol	Different	2	0	0	#N/A	0	None	126.522	54.8233	218.611	51.9537	#N/A	#N/A	31.38	83	91.7	2711600000	331	127.89	19.3	0		0	0	0	0	0	0	0	cell periphery:cytoplasm:endoplasmic reticulum:nucleus	cell periphery:cytoplasm:endoplasmic reticulum	cytoplasm:endoplasmic reticulum	cytoplasm:nucleus	#N/A	2.5	#N/A	0	01
YMR281W	GPI12	ER membrane protein involved in the second step of GPI anchor assembly; the second step is the de-N-acetylation of the N-acetylglucosaminylphosphatidylinositol intermediate; functional homolog of human PIG-Lp; GPI stands for glycosylphosphatidylinositol	01_02_22	4A11	12_F_10	SWAT	ER	ER	ER	cytosol	below threshold	Different	1	0	0	#N/A	1	14	61.8945	25.1911	75.963	27.2123	#N/A	#N/A	16.55	#N/A	18.1	21284000	52	28.82	17	0		0	0	0	0	0	0	0	endoplasmic reticulum	endoplasmic reticulum	endoplasmic reticulum	0	inviable	#N/A	#N/A	ENSG00000108474	01
YKL175W	ZRT3	Vacuolar membrane zinc transporter; transports zinc from storage in the vacuole to the cytoplasm when needed; transcription is induced under conditions of zinc deficiency	01_02_23	3A12	06_E_10	SWAT	ER	ER	ER	vacuole	below threshold	Different	1	0	0	#N/A	7	7	32.3787	24.065	16.3526	24.2056	#N/A	#N/A	#N/A	#N/A	23.1	#N/A	#N/A	86	#N/A	0		0	0	0	0	0	0	0	vacuolar membrane:vacuole	vacuolar membrane	vacuolar membrane:vacuole	0	#N/A	#N/A	#N/A	0	01
YNR002C	ATO2	Putative transmembrane protein involved in export of ammonia; ammonia is a starvation signal that promotes cell death in aging colonies; phosphorylated in mitochondria; member of the TC 9.B.33 YaaH family; homolog of Y. lipolytica Gpr1p; ATO2 has a paralog, ADY2, that arose from the whole genome duplication	01_02_24	4A12	07_F_10	SWAT	punctate,vacuole	cell periphery,vacuole	below threshold	below threshold	below threshold	New	1	0	0	#N/A	6	90	29.9928	21.0336	20.6655	25.9666	#N/A	#N/A	15.45	#N/A	0	#N/A	#N/A	2.27	13.4	0		0	0	0	0	0	0	0	cell periphery:mitochondria	cell periphery	cell periphery	mitochondria	#N/A	#N/A	#N/A	0	01
YJL091C	GWT1	Protein involved in the inositol acylation of GlcN-PI; the inositol acylation of glucosaminyl phosphatidylinositol (GlcN-PI) forms glucosaminyl(acyl)phosphatidylinositol (GlcN(acyl)PI), an intermediate in the biosynthesis of glycosylphosphatidylinositol (GPI) anchors	01_02_25	3A13	08_F_06	SWAT	ER	below threshold	punctate	ER	below threshold	New	1	0	0	#N/A	13	20	18.6815	22.8857	9.46145	23.7712	#N/A	#N/A	14.05	#N/A	16.2	#N/A	#N/A	44.9	20.8	ActiveX VT_ERROR:	ActiveX VT_ERROR:	0	0	ActiveX VT_ERROR:	0	0	0	0	ActiveX VT_ERROR:	ActiveX VT_ERROR:	ActiveX VT_ERROR:	ActiveX VT_ERROR:	inviable	#N/A	#N/A	ENSG00000277161	01
YMR292W	GOT1	Homodimeric protein that is packaged into COPII vesicles; cycles between the ER and Golgi; involved in secretory transport but not directly required for aspects of transport assayed in vitro; may influence membrane composition	01_02_26	4A13	12_E_01	SWAT	punctate	punctate	punctate	ER	punctate	Different	1	0	0	#N/A	4	9	113.292	40.7662	208.007	39.2185	#N/A	#N/A	14.08	#N/A	78.8	#N/A	8	128.03	#N/A	0		0	0	0	0	0	0	0	COPII vesicle:Golgi:endoplasmic reticulum	COPII vesicle:Golgi:endoplasmic reticulum	Golgi	0	#N/A	#N/A	#N/A	ENSG00000111711	01
YKL178C	STE3	Receptor for a factor pheromone; couples to MAP kinase cascade to mediate pheromone response; transcribed in alpha cells and required for mating by alpha cells, ligand bound receptors endocytosed and recycled to the plasma membrane; GPCR	01_02_27	3A14	15_D_01	SWAT	ER	ER	ER	missing	below threshold	New	1	0	5	25	5	33	29.0033	35.2977	8.63983	23.7801	#N/A	#N/A	#N/A	#N/A	1	#N/A	#N/A	7.33	17	Bearing Signal Sequence		0	0	0	0	0	0	0	cell periphery	cell periphery	0	0	#N/A	#N/A	#N/A	0	01
YNR006W	VPS27	Endosomal protein that forms a complex with Hse1p; required for recycling Golgi proteins, forming lumenal membranes and sorting ubiquitinated proteins destined for degradation; has Ubiquitin Interaction Motifs which bind ubiquitin (Ubi4p)	01_02_28	4A14	14_F_11	SWAT	cytosol,punctate	punctate	below threshold	punctate	cytosol	Same	2	0	0	#N/A	0	None	64.0245	32.1376	67.2174	38.6194	#N/A	#N/A	#N/A	#N/A	20.2	2130100000	7	34.42	5.7	0		0	0	0	0	0	0	0	endosome	endosome	endosome	0	#N/A	4	#N/A	ENSG00000139668	01
YNL131w	TOM22	Component of the TOM (Translocase of Outer Membrane) complex; responsible for initial import of mitochondrially directed proteins; mediates interaction between TOM and TIM complexes and acts as a receptor for precursor proteins	01_02_29	3A15	29_B_5	SWAT	mitochondria	mitochondria	mitochondria	ambiguous	mitochondria	New	1	0	0	#N/A	1	98	149.69	87.2854	99.0005	52.3461	7.58186	5.96486	#N/A	#N/A	644.6	4217200000	300	371.05	40.3	Mitochondria outer membrane		0	0	0	0	0	0	0	0	0	0	0	inviable	2	#N/A	0	01
YMR296C	LCB1	Component of serine palmitoyltransferase; responsible along with Lcb2p for the first committed step in sphingolipid synthesis, which is the condensation of serine with palmitoyl-CoA to form 3-ketosphinganine	01_02_30	4A15	10_A_08	SWAT	ER	ER	ER	ER	below threshold	Same	1	0	0	#N/A	2	12	50.1072	37.3424	19.8109	23.0506	#N/A	#N/A	#N/A	384	31.8	6335500000	300	145.53	8.1	0		0	0	0	0	0	0	0	cytoplasm:endoplasmic reticulum	0	cytoplasm:endoplasmic reticulum	0	inviable	#N/A	#N/A	ENSG00000090054	01
YKL179C	COY1	Golgi membrane protein with similarity to mammalian CASP; genetic interactions with GOS1 (encoding a Golgi snare protein) suggest a role in Golgi function	01_02_31	3A16	28_F_6	SWAT	punctate	punctate	punctate	punctate	punctate	Same	1	0	0	#N/A	1	614	53.1701	42.5416	58.3458	46.5194	#N/A	#N/A	16.28	#N/A	28.5	4868000000	23	68.93	7.1	0		0	0	0	0	0	0	0	Golgi	Golgi	Golgi	0	#N/A	2.5	#N/A	ENSG00000119547	01
YNR007C	ATG3	E2-like enzyme; involved in autophagy and cytoplasm-to-vacuole targeting (Cvt) pathway; plays a role in formation of Atg8p-phosphatidylethanolamine conjugates, which are involved in membrane dynamics during autophagy and Cvt; interaction with Atg8p regulated by acetylation by NuA4 histone acetyltransferase Esa1p while attenuation of Atg3 acetylation is mediated by histone deacetylase Rpd3p; Atg12…	01_02_32	4A16	15_C_09	SWAT	cytosol	cytosol	cytosol	cytosol	cytosol	Same	1	0	0	#N/A	0	None	71.9235	30.7642	115.04	47.4096	#N/A	#N/A	25.89	#N/A	13.7	#N/A	#N/A	13.49	12.4	0		0	0	0	0	0	0	0	cytoplasm	cytoplasm	cytoplasm	cytoplasm	#N/A	#N/A	#N/A	ENSG00000144848	01
YJL163C	YJL163C	Putative protein of unknown function	01_02_33	3A17	05_D_08	SWAT	vacuole membrane	vacuole membrane	below threshold	below threshold	#NAME?	New	1	0	0	#N/A	12	79	46.3957	17.2197	42.2086	27.9294	#N/A	#N/A	16.37	#N/A	2.4	#N/A	#N/A	7.89	9.7	0		0	0	0	0	0	0	0	integral component of membrane:membrane	0	0	0	#N/A	#N/A	#N/A	0	01
YMR298W	LIP1	Ceramide synthase subunit; single-span ER membrane protein associated with Lag1p and Lac1p and required for ceramide synthase activity, null mutant grows extremely slowly and is defective in ceramide synthesis	01_02_34	4A17	13_G_07	SWAT	ER	ER	ER,punctate	missing	ER	New	1	0	0	#N/A	1	20	171.469	61.7571	297.941	45.5364	#N/A	#N/A	#N/A	#N/A	202	376050000	#N/A	140.43	57.5	0		0	0	0	0	0	0	0	endoplasmic reticulum:nuclear membrane	endoplasmic reticulum	endoplasmic reticulum	endoplasmic reticulum:nuclear membrane	inviable	#N/A	#N/A	0	01
YKL183C-A	YKL183C-A	Putative protein of unknown function; identified by fungal homology and RT-PCR	01_02_35	3A18	09_D_08	SWAT	below threshold	below threshold	punctate	missing	#N/A	0	0	0	0	#N/A	1	12	11.9141	21.5408	4.97994	24.4711	#N/A	#N/A	#N/A	#N/A	0	#N/A	#N/A	#N/A	#N/A	0		0	0	0	0	0	0	0	cellular_component:integral component of membrane:membrane	0	0	0	#N/A	#N/A	#N/A	0	01
YNR008W	LRO1	Acyltransferase that catalyzes diacylglycerol esterification; one of several acyltransferases that contribute to triglyceride synthesis; Lro1p and Dga1p can O-acylate ceramides; putative homolog of human lecithin cholesterol acyltransferase	01_02_36	4A18	01_E_07	Blank	Blank	Blank	Blank	below threshold	below threshold	Blank	1	0	0	#N/A	1	80	60.1213	27.4707	59.3643	25.9599	#N/A	#N/A	17.4	#N/A	22.1	216650000	#N/A	45.42	9.7	Lipid droplet		0	0	0	0	0	0	0	endoplasmic reticulum:lipid particle	endoplasmic reticulum:lipid particle	endoplasmic reticulum	0	#N/A	#N/A	#N/A	0	01
YBR086C	IST2	Cortical ER protein involved in ER-plasma membrane tethering; one of 6 proteins (Ist2p, Scs2p, Scs22p, Tcb1p, Tcb2p, Tcb3p) that connect ER to the plasma membrane (PM) and regulate PM phosphatidylinositol-4-phosphate (PI4P) levels by controlling access of Sac1p phosphatase to its substrate PI4P in the PM; localizes to the mother cell in small-budded cells and to the bud in medium- and large-budde…	01_02_37	3A19	13_F_12	SWAT	cell periphery,punctate	cell periphery	cell periphery,punctate	cell periphery	cell periphery	New	1	0	0	#N/A	8	133	88.065	64.8035	125.39	40.9784	#N/A	#N/A	46.84	167.1	37	7301100000	482	173.5	8.6	ActiveX VT_ERROR:	ActiveX VT_ERROR:	0	0	ActiveX VT_ERROR:	0	0	0	0	ActiveX VT_ERROR:	ActiveX VT_ERROR:	ActiveX VT_ERROR:	ActiveX VT_ERROR:	#N/A	#N/A	#N/A	0	01
YMR300C	ADE4	Phosphoribosylpyrophosphate amidotransferase (PRPPAT); catalyzes first step of the 'de novo' purine nucleotide biosynthetic pathway; also known as amidophosphoribosyltransferase	01_02_38	4A19	01_C_05	SWAT	punctate	missing	missing	cytosol	#N/A	Different	1	0	0	#N/A	0	None	16.647	#N/A	#N/A	#N/A	#N/A	#N/A	89.54	1190	81.5	5392200000	#N/A	167.72	12.2	Farnesylation		0	0	0	0	1	0	0	cytoplasm	0	0	cytoplasm	#N/A	#N/A	#N/A	ENSG00000128059	01
YKL187C	FAT3	Protein required for fatty acid uptake; protein abundance increases in cortical patches in response to oleate exposure; the authentic, non-tagged protein is detected in a phosphorylated state in highly purified mitochondria in high-throughput studies; FAT3 has a paralog, YLR413W, that arose from the whole genome duplication	01_02_39	3A20	28_G_11	SWAT	cell periphery	cell periphery,vacuole	below threshold	ambiguous	cell periphery	New	1	0	0	#N/A	4	12	72.5216	24.9254	108.84	32.0675	#N/A	#N/A	16.25	#N/A	0	#N/A	#N/A	7.02	8.6	0		0	0	0	0	0	0	0	mitochondria	0	mitochondria	mitochondria	#N/A	#N/A	#N/A	0	01
YNR013C	PHO91	Low-affinity vacuolar phosphate transporter; exports phosphate from the vacuolar lumen to the cytosol; regulates phosphate and polyphosphate metabolism; acts upstream of Pho81p in regulation of the PHO pathway; localizes to sites of contact between the vacuole and mitochondria (vCLAMPs); deletion of pho84, pho87, pho89, pho90, and pho91 causes synthetic lethality; transcription independent of Pi …	01_02_40	4A20	05_B_05	SWAT	vacuole membrane	vacuole membrane	vacuole membrane	ER	#N/A	Different	1	0	0	#N/A	12	429	118.111	31.8918	88.6482	#N/A	#N/A	#N/A	34.9	96.6	19.1	2079100000	37	71.78	4.9	0		0	0	0	0	0	0	0	vacuolar membrane:vacuole	vacuolar membrane	vacuolar membrane:vacuole	0	#N/A	#N/A	#N/A	0	01
YJL170C	ASG7	Protein that regulates signaling from G protein beta subunit Ste4p; contributes to relocalization of Ste4p within the cell; specific to a-cells and induced by alpha-factor	01_02_41	3A21	28_A_11	SWAT	punctate,vacuole	vacuole	below threshold	below threshold	below threshold	New	1	0	0	#N/A	2	50	58.8815	20.7854	96.9169	25.7287	#N/A	#N/A	16.09	#N/A	7.6	134690000	#N/A	17.43	41.2	0		0	0	KKxx	0	0	0	0	cell periphery	cell periphery	0	0	#N/A	#N/A	#N/A	0	01
YMR304W	UBP15	Ubiquitin-specific protease involved in protein deubiquitination; forms a complex with AAA peroxins Pex1p and Pex6p; deubiquitinates mono- and polyubiquitinated forms of Pex5p; deubiquitinates Clb5p, counteracting APC activity, and facilitating both Clb5p accumulation and S phase entry; physically interacts with anaphase-promoting complex/cyclosome (APC/C) activator, Cdh1p; catalytic activity reg…	01_02_42	4A21	28_G_2	SWAT	cytosol	cytosol,nucleus	cytosol,punctate	cytosol	cytosol	Different	1	0	0	#N/A	0	None	126.897	38.3407	97.172	45.2718	#N/A	#N/A	37.42	189	12.2	2785500000	20	61.86	8.5	Peroxisome	0	0	0	0	0	0	0	0	cytoplasm:peroxisome	peroxisome	0	cytoplasm	#N/A	#N/A	#N/A	ENSG00000124486	01
YKL188C	PXA2	Subunit of heterodimeric peroxisomal ABC transport complex, with Pxa1p; required for import of long-chain fatty acids into peroxisomes; similar to human adrenoleukodystrophy transportesr ABCD1 and ABCD2, and ALD-related proteins; mutations in ABCD1 cause X-linked adrenoleukodystrophy (X-ALD), a peroxisomal disorder; human ABCD1 and ABCD2 can each partially complement yeast pxa1 pxa2 double null m…	01_02_43	3A22	02_G_06	SWAT	punctate	punctate	below threshold	below threshold	below threshold	New	1	0	6	0	0	None	43.8465	20.4636	21.4806	25.5119	#N/A	#N/A	14.95	#N/A	0.6	#N/A	#N/A	3.87	11.7	Peroxisome	Pex19 signal (by Peroxisomes DB)	0	0	0	0	0	0	0	peroxisome	peroxisome	peroxisome	0	#N/A	#N/A	#N/A	0	01
YNR016C	ACC1	Acetyl-CoA carboxylase, biotin containing enzyme; catalyzes carboxylation of cytosolic acetyl-CoA to form malonyl-CoA and regulates histone acetylation by regulating the availablity of acetyl-CoA; required for de novo biosynthesis of long-chain fatty acids; ACC1 has a paralog, HFA1, that arose from the whole genome duplication	01_02_44	4A22	14_C_03	SWAT	cytosol,punctate	cytosol,punctate	cytosol	cytosol,punctate	cytosol	Same	2	0	0	#N/A	0	None	231.971	135.351	192.195	58.8492	#N/A	#N/A	348.88	1432	128.6	154000000000	233	670.29	8.6	0		0	0	0	0	0	0	0	cytoplasm:endoplasmic reticulum:mitochondria	endoplasmic reticulum	cytoplasm:endoplasmic reticulum	mitochondria	inviable	#N/A	#N/A	ENSG00000278540	01
YJL172W	CPS1	Vacuolar carboxypeptidase S; expression is induced under low-nitrogen conditions	01_02_45	3A23	11_C_06	SWAT	vacuole	vacuole	below threshold	missing	vacuole membrane	New	1	0	0	#N/A	1	20	148.637	20.0115	114.653	37.9359	#N/A	#N/A	#N/A	#N/A	61.6	14473000000	9	221.21	16.8	0		0	0	0	0	0	0	0	vacuolar membrane:vacuole	vacuole	vacuolar membrane:vacuole	0	#N/A	2.5	#N/A	ENSG00000162877	01
YIL114C	POR2	Putative mitochondrial porin (voltage-dependent anion channel); not required for mitochondrial membrane permeability or mitochondrial osmotic stability; POR2 has a paralog, POR1, that arose from the whole genome duplication	01_02_46	4A23	29_H_5	SWAT	mitochondria	mitochondria	mitochondria	mitochondria	#N/A	Same	1	0	0	#N/A	0	None	50.916	22.076	12.5095	#N/A	9.26144	8.32395	14.66	#N/A	26.7	#N/A	#N/A	53.59	17.9	Mitochondria outer membrane		0	0	0	0	0	0	0	mitochondria	mitochondria	mitochondria	mitochondria	#N/A	4	#N/A	ENSG00000078668	01
YKL196C	YKT6	Vesicle membrane protein (v-SNARE) with acyltransferase activity; involved in trafficking to and within the Golgi, endocytic trafficking to the vacuole, and vacuolar fusion; membrane localization due to prenylation at the carboxy-terminus; human homolog YKT6 can complement yeast ykt6 mutant	01_02_47	3A24	01_A_02	SWAT	cytosol	cytosol	below threshold	missing	cytosol	New	1	0	0	#N/A	0	None	189.769	22.0518	247.547	62.4493	#N/A	#N/A	#N/A	#N/A	302.4	32305000000	#N/A	283.23	12.4	Farnesylation		0	0	0	1	1	0	0	Golgi:cell periphery:endosome:mitochondria:vacuole	Golgi:endosome:vacuole	cell periphery	mitochondria	inviable	#N/A	#N/A	ENSG00000106636	01
YNR019W	ARE2	Acyl-CoA:sterol acyltransferase; endoplasmic reticulum enzyme that contributes the major sterol esterification activity in the presence of oxygen; ARE2 has a paralog, ARE1, that arose from the whole genome duplication	01_02_48	4A24	01_B_07	SWAT	ER	ER	ER	ER	ER	Same	1	0	0	#N/A	10	218	107.413	46.5926	123.01	46.1361	#N/A	#N/A	13.59	#N/A	22.4	635110000	#N/A	63.55	9.6	Lipid droplet		0	0	0	0	0	0	0	endoplasmic reticulum	endoplasmic reticulum	endoplasmic reticulum	0	#N/A	2	#N/A	ENSG00000167780	01
YDL027C	MRX9	Protein that associates with mitochondrial ribosome; the authentic, non-tagged protein is detected in highly purified mitochondria in high-throughput studies; YDL027C is not an essential gene	01_03_01	1B1	09_G_03	SWAT	ER,punctate	punctate	below threshold	mitochondria	below threshold	Different	2	0	0	#N/A	2	125	23.9862	20.4063	9.72373	26.1349	#N/A	#N/A	14.41	#N/A	4.3	140720	22	26.83	9.6	0		0	0	0	0	0	0	0	mitochondria	0	0	mitochondria	#N/A	#N/A	#N/A	0	01
YGR147C	NAT2	Protein of unknown function; has an apparent role in acetylation of N-terminal methionine residues	01_03_02	2B1	11_G_02	SWAT	mitochondria	punctate,mitochondria	below threshold	mitochondria	below threshold	Same	1	0	0	#N/A	1	100	41.3329	20.458	37.1641	23.041	#N/A	#N/A	14.43	171.5	40.4	256460000	114	87.49	9.8	0		0	0	0	0	0	0	0	cytoplasm:mitochondria	0	cytoplasm	mitochondria	inviable	#N/A	#N/A	0	01
Control-his3d-SWAT	None	#N/A	01_03_03	1B2	#N/A	SWAT	cytosol	cytosol	below threshold	#N/A	missing	#N/A	#N/A	0	#N/A	#N/A	#N/A	#N/A	196.323	18.5428	171.788	0	#N/A	#N/A	#N/A	#N/A	#N/A	#N/A	#N/A	#N/A	#N/A	#N/A	#N/A	0	0	#N/A	0	0	0	0	#N/A	#N/A	#N/A	#N/A	#N/A	#N/A	#N/A	#N/A	01
Control-his3d-SWAT	None	#N/A	01_03_04	2B2	#N/A	SWAT	cytosol	cytosol	below threshold	#N/A	missing	#N/A	#N/A	0	#N/A	#N/A	#N/A	#N/A	194.799	20.1614	216.317	0	#N/A	#N/A	#N/A	#N/A	#N/A	#N/A	#N/A	#N/A	#N/A	#N/A	#N/A	0	0	#N/A	0	0	0	0	#N/A	#N/A	#N/A	#N/A	#N/A	#N/A	#N/A	#N/A	01
YDL035C	GPR1	Plasma membrane G protein coupled receptor (GPCR); interacts with the heterotrimeric G protein alpha subunit, Gpa2p, and with Plc1p; sensor that integrates nutritional signals with the modulation of cell fate via PKA and cAMP synthesis	01_03_05	1B3	07_G_06	SWAT	punctate	below threshold	below threshold	below threshold	#N/A	New	1	0	0	#N/A	6	57	22.1822	19.1289	7.42517	0	#N/A	#N/A	17.97	#N/A	5.5	30449000	31	47.11	6.7	0		0	0	0	0	0	0	0	cell periphery	cell periphery	cell periphery	0	#N/A	#N/A	#N/A	0	01
YGR149W	YGR149W	Glycerophosphocholine acyltransferase (GPCAT); involved in in phosphatidylcholine (PC) synthesis; uses acetyl-CoA to acylate glycero-3-phosphocholine to yield lyso-PC; also catalyzes acylation of glycerophosphoethanolamine with acyl-CoA; predicted to be an integal membrane protein	01_03_06	2B3	04_G_02	SWAT	ER,punctate,bud	cell periphery,ER,punctate	below threshold	cytosol	#N/A	Different	3	0	0	#N/A	8	114	61.1358	22.5566	97.1304	0	#N/A	#N/A	21.86	#N/A	8.1	34182000	38	23.47	6.7	0		0	0	0	0	0	0	0	integral component of membrane:membrane	0	0	0	#N/A	#N/A	#N/A	0	01
Control-his3d-GFPdC	None	#N/A	01_03_07	1B4	#N/A	SWAT	below threshold	below threshold	below threshold	#N/A	missing	#N/A	#N/A	0	#N/A	#N/A	#N/A	#N/A	13.0779	20.9299	5.16354	#N/A	#N/A	#N/A	#N/A	#N/A	#N/A	#N/A	#N/A	#N/A	#N/A	#N/A	#N/A	0	0	#N/A	0	0	0	0	#N/A	#N/A	#N/A	#N/A	#N/A	#N/A	#N/A	#N/A	01
Control-his3d-GFPdC	None	#N/A	01_03_08	2B4	#N/A	SWAT	below threshold	below threshold	below threshold	#N/A	missing	#N/A	#N/A	0	#N/A	#N/A	#N/A	#N/A	14.637	15.4402	6.49525	#N/A	#N/A	#N/A	#N/A	#N/A	#N/A	#N/A	#N/A	#N/A	#N/A	#N/A	#N/A	0	0	#N/A	0	0	0	0	#N/A	#N/A	#N/A	#N/A	#N/A	#N/A	#N/A	#N/A	01
YDL052C	SLC1	1-acyl-sn-glycerol-3-phosphate acyltransferase; catalyzes the acylation of lysophosphatidic acid to form phosphatidic acid, a key intermediate in lipid metabolism; enzymatic activity detected in lipid particles and microsomes	01_03_09	1B5	01_B_01	SWAT	ER	ER	ER	ER	below threshold	Same	1	0	6	0	0	None	87.7507	52.6416	115.356	31.0847	#N/A	#N/A	82.31	671	59.4	4223800000	138	157.23	12.2	Bearing Signal Sequence		0	0	KKxx	0	0	0	0	lipid particle	lipid particle	0	0	#N/A	#N/A	#N/A	ENSG00000204310	01
YGR152C	RSR1	GTP-binding protein of the Ras superfamily; required for bud site selection, morphological changes in response to mating pheromone, and efficient cell fusion; localized to the plasma membrane; significantly similar to mammalian Rap GTPases	01_03_10	2B5	01_H_04	SWAT	cell periphery,ER	cell periphery,vacuole	ambiguous,cell periphery	nucleus,cytosol	cytosol	Different	2	0	0	#N/A	0	None	88.4116	49.553	160.728	41.4052	#N/A	#N/A	36.45	127	69.4	85014000	11	54.1	14.6	Farnesylation		0	0	0	0	1	1	0	bud neck/tip:cell periphery	bud neck/tip:cell periphery	cell periphery	0	#N/A	#N/A	#N/A	ENSG00000125249	01
Control-URA+	None	#N/A	01_03_11	1B6	#N/A	SWAT	below threshold	missing	missing	#N/A	#N/A	#N/A	#N/A	0	#N/A	#N/A	#N/A	#N/A	15.7155	#N/A	#N/A	#N/A	#N/A	#N/A	#N/A	#N/A	#N/A	#N/A	#N/A	#N/A	#N/A	#N/A	#N/A	0	0	#N/A	0	0	0	0	#N/A	#N/A	#N/A	#N/A	#N/A	#N/A	#N/A	#N/A	01
Control-URA+	None	#N/A	01_03_12	2B6	#N/A	SWAT	below threshold	missing	missing	#N/A	#N/A	#N/A	#N/A	0	#N/A	#N/A	#N/A	#N/A	14.5455	0	0	#N/A	#N/A	#N/A	#N/A	#N/A	#N/A	#N/A	#N/A	#N/A	#N/A	#N/A	#N/A	0	0	#N/A	0	0	0	0	#N/A	#N/A	#N/A	#N/A	#N/A	#N/A	#N/A	#N/A	01
YDL054C	MCH1	Protein with similarity to mammalian monocarboxylate permeases; monocarboxylate permeases are involved in transport of monocarboxylic acids across the plasma membrane but mutant is not deficient in monocarboxylate transport	01_03_13	1B7	05_B_11	SWAT	vacuole membrane	vacuole membrane	vacuole membrane	vacuole membrane	below threshold	Same	1	0	0	#N/A	12	30	67.973	30.7204	95.2852	29.9193	#N/A	#N/A	22.09	#N/A	4.3	#N/A	#N/A	26.84	8.7	0		0	0	0	0	0	0	0	vacuolar membrane:vacuole	vacuolar membrane	vacuolar membrane:vacuole	vacuolar membrane	#N/A	#N/A	#N/A	0	01
YGR154C	GTO1	Omega-class glutathione transferase; induced under oxidative stress; putative peroxisomal localization	01_03_14	2B7	02_B_11	SWAT	cytosol,punctate	cytosol,punctate	below threshold	cytosol	cytosol	Different	1	0	0	#N/A	0	None	108.324	18.2352	175.831	36.3298	#N/A	#N/A	19.31	#N/A	0	#N/A	#N/A	13.82	10.7	Peroxisome	predicted PTS1 (by Peroxisome DB)	0	0	0	0	0	0	1	peroxisome	peroxisome	peroxisome	0	#N/A	#N/A	#N/A	0	01
YDR177W	UBC1	Ubiquitin-conjugating enzyme; key E2 partner with Ubc4p for the anaphase-promoting complex (APC); mediates selective degradation of short-lived and abnormal proteins; plays a role in vesicle biogenesis and ER-associated protein degradation (ERAD); component of the cellular stress response; protein abundance increases in response to DNA replication stress key E2 partner with Ubc4p for the anaphase…	01_03_15	1B8	28_F_9	SWAT	cytosol	cytosol	cytosol	nucleus,cytosol	cytosol	Same	1	0	0	#N/A	0	None	185.482	85.3367	302.826	48.8799	#N/A	#N/A	61.15	119	180.9	8433000000	45	153.37	24.3	0		0	0	0	0	0	0	0	proteasome complex	0	0	0	inviable	#N/A	#N/A	ENSG00000078140	01
YHR175W	CTR2	Low-affinity copper transporter of the vacuolar membrane; mutation confers resistance to toxic copper concentrations, while overexpression confers resistance to copper starvation; regulated by nonsense-mediated mRNA decay pathway	01_03_16	2B8	13_B_10	SWAT	ER	ER,punctate	below threshold	ER	below threshold	Same	1	0	0	#N/A	2	82	86.5388	17.9479	40.706	24.575	#N/A	#N/A	19.95	76.2	33.2	#N/A	300	84.89	14.5	0		0	0	0	0	0	0	0	vacuolar membrane:vacuole	vacuolar membrane	vacuolar membrane:vacuole	0	#N/A	#N/A	#N/A	ENSG00000136868	01
YDL058W	USO1	Essential protein involved in vesicle-mediated ER to Golgi transport; binds membranes and functions during vesicle docking to the Golgi; required for assembly of the ER-to-Golgi SNARE complex	01_03_17	1B9	12_B_05	SWAT	punctate	cytosol,punctate	punctate	punctate	ambiguous,cytosol	Same	1	0	0	#N/A	0	None	133.018	30.6336	97.2444	54.7756	#N/A	#N/A	33.71	136.2	21.6	10124000000	66	86.8	6.9	0		0	0	0	0	0	0	0	COPII vesicle:Golgi:cytoplasm:cytoskeleton:endoplasmic reticulum	COPII vesicle:Golgi	Golgi:cytoplasm:cytoskeleton:endoplasmic reticulum	0	inviable	#N/A	#N/A	ENSG00000138768	01
YGR157W	CHO2	Phosphatidylethanolamine methyltransferase (PEMT); catalyzes the first step in the conversion of phosphatidylethanolamine to phosphatidylcholine during the methylation pathway of phosphatidylcholine biosynthesis	01_03_18	2B9	06_A_11	SWAT	ER,bud	ER,punctate	ER	ER	ER,punctate	Same	2	0	0	#N/A	10	56	147.489	59.2641	268.763	52.2288	#N/A	#N/A	108.98	524.1	46.5	7676900000	43	347.79	#N/A	0		0	0	0	0	0	0	0	endoplasmic reticulum	0	0	endoplasmic reticulum	#N/A	#N/A	#N/A	0	01
YDR182W	CDC1	Putative mannose-ethanolamine phosphate phosphodiesterase; involved in GPI-anchor remodeling prior to the attachment of cell wall proteins to beta 1,3-glucan, removing ethanolamine phosphate from the first mannose of GPI anchors; mutants display elevated Ca2+-dependent signaling resulting in secondary actin polarization and Golgi inheritance defects; enzyme is Mn2+-dependent; mutants have cell di…	01_03_19	1B10	12_B_09	SWAT	punctate	vacuole	punctate	ambiguous	below threshold	New	1	0	0	#N/A	3	42	58.331	30.3379	56.5377	29.4767	#N/A	#N/A	18.35	#N/A	22.7	97411000	6	75.58	9.3	0		0	0	0	0	0	0	0	endoplasmic reticulum	endoplasmic reticulum	0	0	inviable	3.5	#N/A	ENSG00000154889	01
YHR175W-A	YHR175W-A	Putative protein of unknown function; identified by fungal homology and RT-PCR	01_03_20	2B10	14_A_04	SWAT	below threshold	below threshold	below threshold	missing	#N/A	0	0	0	0	#N/A	0	None	14.654	16.4922	6.63933	24.6044	#N/A	#N/A	#N/A	#N/A	0	#N/A	#N/A	#N/A	9.7	0		0	0	0	0	0	0	0	cellular_component:integral component of membrane:membrane	0	0	0	#N/A	#N/A	#N/A	0	01
YDL065C	PEX19	Chaperone and import receptor for newly-synthesized class I PMPs; binds peroxisomal membrane proteins (PMPs) in the cytoplasm and delivers them to the peroxisome for subsequent insertion into the peroxisomal membrane; interacts with Myo2p and contributes to peroxisome partitioning	01_03_21	1B11	03_D_03	SWAT	cytosol,punctate	cytosol	punctate	cytosol	cytosol,punctate	Same	2	0	0	#N/A	0	None	91.7961	43.3058	137.384	45.8615	#N/A	#N/A	#N/A	176	61.4	4233500000	56	54.83	7.6	Peroxisome	0	0	0	0	0	0	0	0	cytoplasm:endoplasmic reticulum:peroxisome	cytoplasm:endoplasmic reticulum:peroxisome	cytoplasm:endoplasmic reticulum:peroxisome	0	#N/A	#N/A	#N/A	0	01
YGR163W	GTR2	Subunit of a TORC1-stimulating GTPase complex; subunit of the Gtr1-Gtr2 GTPase complex that stimulates TORC1 in response to amino acid stimulation; stimulates the GTPase activity of Gtr1p; negatively regulates the Ran/Tc4 GTPase cycle; activates transcription; tethered to the vacuolar membrane as part of the EGO complex (EGOC); required for sorting of Gap1p; activated by the the Lst4p-Lst7p GAP c…	01_03_22	2B11	12_F_08	SWAT	vacuole membrane	cytosol,vacuole membrane	vacuole membrane	vacuole membrane	below threshold	Same	1	0	0	#N/A	0	None	64.8938	34.3189	80.6834	27.2887	#N/A	#N/A	30.67	82.5	24.3	123520000	37	47.34	11.8	0		0	0	0	0	0	0	0	cytoplasm:endosome:nucleus:vacuolar membrane:vacuole	cytoplasm:endosome:nucleus:vacuolar membrane	cytoplasm:nucleus:vacuolar membrane:vacuole	0	#N/A	3.5	#N/A	ENSG00000273637	01
YDR189W	SLY1	Hydrophilic protein involved in ER/Golgi vesicle trafficking; SM (Sec1/Munc-18) family protein that binds the tSNARE Sed5p and stimulates its assembly into a trans-SNARE membrane-protein complex	01_03_23	1B12	13_C_09	SWAT	cytosol,punctate	cytosol	punctate	punctate,punctate	cytosol	Same	2	0	0	#N/A	0	None	123.525	34.8233	140.452	56.2253	#N/A	#N/A	53.59	278.9	29.6	3928500000	32	84.24	8.7	0		0	0	0	0	0	0	0	COPII vesicle:Golgi:cytoplasm:endoplasmic reticulum	COPII vesicle:Golgi:endoplasmic reticulum	cytoplasm	0	inviable	2.5	#N/A	ENSG00000092108	01
YHR176W	FMO1	Flavin-containing monooxygenase; localized to the cytoplasmic face of the ER membrane; catalyzes oxidation of biological thiols to maintain the ER redox buffer ratio for correct folding of disulfide-bonded proteins	01_03_24	2B12	09_F_09	SWAT	cytosol	cytosol	below threshold	below threshold	cytosol	New	1	0	5	0	0	None	55.7385	21.7561	107.085	48.2428	#N/A	#N/A	14.57	#N/A	2.2	#N/A	#N/A	6.38	12.5	0		0	0	0	0	0	0	0	endoplasmic reticulum	endoplasmic reticulum	0	0	#N/A	#N/A	#N/A	ENSG00000094963	01
YDL072C	YET3	Protein of unknown function; YET3 null mutant decreases the level of secreted invertase; homolog of human BAP31 protein; protein abundance increases in response to DNA replication stress	01_03_25	1B13	08_F_03	SWAT	ER	punctate,nuclear periphery	below threshold	ER	below threshold	Same	1	0	0	#N/A	3	6	25.1729	17.6891	15.8446	26.2172	#N/A	#N/A	82.18	650	120.9	8008800000	#N/A	216.25	27.8	0		0	0	0	0	0	0	0	endoplasmic reticulum	endoplasmic reticulum	endoplasmic reticulum	endoplasmic reticulum	#N/A	#N/A	#N/A	0	01
YGR166W	TRS65	Component of transport protein particle (TRAPP) complex II; TRAPPII is a multimeric guanine nucleotide-exchange factor for the GTPase Ypt1p, regulating intra-Golgi and endosome-Golgi traffic; role in cell wall beta-glucan biosynthesis and the stress response	01_03_26	2B13	10_F_07	SWAT	punctate	punctate	missing	punctate	below threshold	Same	1	0	0	#N/A	0	None	40.3843	#N/A	18.7794	26.7709	#N/A	#N/A	17.53	#N/A	4	14601000	#N/A	24.87	10.9	0		0	0	0	0	0	0	0	Golgi:cytoplasm	Golgi	Golgi:cytoplasm	0	#N/A	1.5	#N/A	0	01
YDR196C	CAB5	Subunit of the CoA-Synthesizing Protein Complex (CoA-SPC); subunits of this complex are: Cab2p, Cab3p, Cab4p, Cab5p, Sis2p and Vhs3p; probable dephospho-CoA kinase (DPCK) that catalyzes the last step in coenzyme A biosynthesis; null mutant lethality is complemented by human homolog DCAKD and by E. coli coaE (encoding DPCK); detected in purified mitochondria in high-throughput studies; also locali…	01_03_27	1B14	11_A_06	SWAT	cytosol	cytosol	below threshold	ER	below threshold	Different	1	0	0	#N/A	1	211	60.4922	23.4291	43.1857	26.6363	#N/A	#N/A	15.87	80.5	29.8	371120000	300	52.69	14.4	Lipid droplet		0	0	0	0	0	0	0	endoplasmic reticulum:lipid particle:mitochondria:nuclear membrane:nucleus	lipid particle	endoplasmic reticulum:mitochondria:nucleus	endoplasmic reticulum:mitochondria:nuclear membrane	inviable	#N/A	#N/A	ENSG00000172992	01
YHR181W	SVP26	Integral membrane protein of the early Golgi apparatus and ER; involved in COP II vesicle transport; may also function to promote retention of proteins in the early Golgi compartment	01_03_28	2B14	28_A_5	SWAT	ER,punctate	ER	below threshold	ER	below threshold	Same	2	0	0	#N/A	4	6	39.3638	24.357	27.6418	24.3744	#N/A	#N/A	#N/A	134	54.5	#N/A	30	83.32	103.9	0		0	0	0	0	0	0	0	COPII vesicle:Golgi:endoplasmic reticulum	COPII vesicle:Golgi:endoplasmic reticulum	Golgi	endoplasmic reticulum	#N/A	#N/A	#N/A	ENSG00000258881	01
YDL077C	VAM6	Guanine nucleotide exchange factor for the GTPase Gtr1p; subunit of the HOPS endocytic tethering complex; vacuole membrane protein; functions as a Rab GTPase effector, interacting with both GTP- and GDP-bound conformations of Ypt7p; facilitates tethering and promotes membrane fusion events at the late endosome and vacuole; required for both membrane and protein trafficking; component of vacuole-m…	01_03_29	1B15	12_D_12	SWAT	vacuole membrane	vacuole membrane	vacuole membrane	vacuole	punctate	Different	1	0	0	#N/A	0	None	68.5273	21.9348	41.2313	33.2577	#N/A	#N/A	19.48	#N/A	4.8	949350000	#N/A	31.15	9.6	0		0	0	0	0	0	0	0	vacuolar membrane:vacuole	vacuolar membrane:vacuole	vacuolar membrane:vacuole	0	#N/A	#N/A	#N/A	ENSG00000135966	01
YGR167W	CLC1	Clathrin light chain; subunit of the major coat protein involved in intracellular protein transport and endocytosis; regulates endocytic progression; thought to regulate clathrin function; the clathrin triskelion is a trimeric molecule composed of three heavy chains that radiate from a vertex and three light chains which bind noncovalently near the vertex of the triskelion	01_03_30	2B15	13_C_12	SWAT	punctate	cytosol,punctate	punctate,bud	punctate	cytosol,punctate	Same	1	0	0	#N/A	0	None	207.503	38.1686	347.931	66.5922	#N/A	#N/A	96.81	542.5	418.1	19198000000	23	281.98	10.4	0		0	0	0	0	0	0	0	endosome	endosome	endosome	0	#N/A	4	#N/A	0	01
YDR200C	VPS64	Protein required for cytoplasm to vacuole targeting of proteins; forms a complex with Far3p and Far7p to Far11p involved in recovery from pheromone-induced cell cycle arrest; mutant has increased aneuploidy tolerance; VPS64 has a paralog, FAR10, that arose from the whole genome duplication	01_03_31	1B16	03_F_04	SWAT	ER	ER	below threshold	cytosol	below threshold	Different	1	0	0	#N/A	1	582	48.5347	24.7796	33.9067	35.2422	#N/A	#N/A	#N/A	#N/A	6.9	51549000	29	27.87	6.3	Tail Anchored		1	0	0	0	0	0	0	cytoplasm:endoplasmic reticulum:endoplasmic reticulum-Golgi intermediate compartment	endoplasmic reticulum:endoplasmic reticulum-Golgi intermediate compartment	endoplasmic reticulum	cytoplasm	#N/A	#N/A	#N/A	0	01
YHR186C	KOG1	Subunit of TORC1; TORC1 is a rapamycin-sensitive complex involved in growth control that contains Tor1p or Tor2p, Lst8p and Tco89p; contains four HEAT repeats and seven WD-40 repeats; may act as a scaffold protein to couple TOR and its effectors	01_03_32	2B16	10_D_05	SWAT	cytosol,punctate,vacuole membrane	cytosol,punctate	ambiguous,vacuole membrane	vacuole membrane	punctate	Same	2	0	0	#N/A	0	None	63.1393	24.0745	67.6218	33.0824	#N/A	#N/A	19.6	#N/A	4.8	165530000	112	45.14	7.8	0		0	0	0	0	0	0	0	cell periphery:mitochondria:vacuolar membrane:vacuole	cell periphery:vacuolar membrane	cell periphery:vacuolar membrane:vacuole	mitochondria:vacuolar membrane	inviable	#N/A	#N/A	ENSG00000141564	01
YDL078C	MDH3	Peroxisomal malate dehydrogenase; catalyzes interconversion of malate and oxaloacetate; involved in the glyoxylate cycle	01_03_33	1B17	02_H_06	SWAT	punctate	punctate	punctate	nucleus,cytosol	punctate	Different	1	0	6	0	0	None	225.973	96.0999	283.576	29.3719	#N/A	#N/A	#N/A	270.5	112.5	20910000000	64	161.27	17.1	Peroxisome	predicted PTS1 (by Peroxisome DB)	0	0	0	0	0	0	1	peroxisome	peroxisome	peroxisome	0	#N/A	#N/A	#N/A	0	01
YGR168C	YGR168C	Putative protein of unknown function; YGR168C is not an essential gene	01_03_34	2B17	02_E_07	SWAT	punctate	punctate	below threshold	below threshold	punctate	New	1	0	0	#N/A	5	35	43.7148	18.9016	59.9669	26.4258	#N/A	#N/A	15.57	#N/A	3	#N/A	58	18.85	32.1	Peroxisome	0	0	0	0	0	0	0	0	integral component of membrane:membrane	0	0	0	#N/A	#N/A	#N/A	0	01
YDR205W	MSC2	Endoplasmic reticulum zinc transporter; part of a heterodimeric transporter with Zrg17p that transfers zinc from the cytosol to the ER lumen; member of the cation diffusion facilitator family of efflux pumps; localizes to ER and nucleus; mutations affect the cellular distribution of zinc and also confer defects in meiotic recombination between homologous chromatids	01_03_35	1B18	05_F_02	SWAT	ER	ER	ER	ER	below threshold	Same	1	0	0	#N/A	15	6	40.4628	23.9809	21.0581	28.121	#N/A	#N/A	27.45	#N/A	4.6	1167500	#N/A	29.16	5.9	0		0	0	0	0	0	0	0	endoplasmic reticulum:nuclear membrane:nucleus	endoplasmic reticulum	endoplasmic reticulum:nuclear membrane:nucleus	0	#N/A	#N/A	#N/A	ENSG00000145740	01
YHR190W	ERG9	Farnesyl-diphosphate farnesyl transferase (squalene synthase); joins two farnesyl pyrophosphate moieties to form squalene in the sterol biosynthesis pathway	01_03_36	2B18	03_H_08	SWAT	ER	ER	ER	ER	ER	Same	1	0	0	#N/A	1	421	187.252	89.7665	384.615	43.5016	#N/A	#N/A	14.42	#N/A	112.7	9652300000	#N/A	213.26	15.1	0		0	0	0	0	0	0	0	endoplasmic reticulum:mitochondria	0	endoplasmic reticulum	endoplasmic reticulum:mitochondria	inviable	3.5	#N/A	ENSG00000079459	01
YDL089W	NUR1	Protein involved in regulation of mitotic exit; dephosphorylation target of Cdc14p in anaphase, which promotes timely rDNA segregation and allows mitotic progression; interacts with Csm1p, Lrs4p; required for rDNA repeat stability; null mutant causes increase in unequal sister-chromatid exchange; GFP-fusion protein localizes to the nuclear periphery, possible Cdc28p substrate	01_03_37	1B19	04_A_11	SWAT	punctate,nuclear periphery	punctate,nuclear periphery	punctate,nuclear periphery	ambiguous,nuclear periphery	punctate	Same	2	0	0	#N/A	4	61	72.18	22.444	73.2202	34.1777	#N/A	#N/A	#N/A	#N/A	9.3	189140000	27	34.06	15.2	0		0	0	0	0	0	0	0	nuclear membrane:nucleus	0	nuclear membrane:nucleus	nuclear membrane	inviable	#N/A	#N/A	0	01
YGR172C	YIP1	Integral membrane protein; required for the biogenesis of ER-derived COPII transport vesicles; interacts with Yif1p and Yos1p; localizes to the Golgi, the ER, and COPII vesicles; human homolog YIPF5 can complement yeast yip1 mutant	01_03_38	2B19	07_E_08	SWAT	ER,punctate	ER	ER,punctate	missing	#N/A	New	2	0	0	#N/A	5	111	86.8418	25.2513	84.8867	#N/A	#N/A	#N/A	#N/A	#N/A	110.1	179290000	#N/A	83.94	36.8	0		0	0	0	0	0	0	0	COPII vesicle:Golgi:endoplasmic reticulum	COPII vesicle:Golgi:endoplasmic reticulum	Golgi:endoplasmic reticulum	0	inviable	3.5	#N/A	ENSG00000177752	01
YDR211W	GCD6	Catalytic epsilon subunit of the translation initiation factor eIF2B; eIF2B is the guanine-nucleotide exchange factor for eIF2; activity subsequently regulated by phosphorylated eIF2; first identified as a negative regulator of GCN4 expression; forms cytoplasmic foci upon DNA replication stress	01_03_39	1B20	13_E_11	SWAT	cytosol	cytosol	cytosol	cytosol	cytosol	Same	1	0	0	#N/A	0	None	116.635	44.0919	110.724	47.7299	#N/A	#N/A	17.46	327.5	43.3	3491900000	300	154.35	9.9	0		0	0	0	0	0	0	0	cytoplasm	0	0	cytoplasm	inviable	#N/A	#N/A	ENSG00000145191	01
YHR192W	LNP1	Lunapark family member involved in ER network formation; regulates the ER asymmetry-induced inheritance block during ER stress; localizes to ER junctions and this localization is regulated by the yeast atlastin ortholog Sey1p; interacts with the reticulon protein Rtn1p; induced in response to the DNA-damaging agent MMS	01_03_40	2B20	13_D_07	SWAT	ER	ER,punctate	ER	cytosol	ER	Different	1	0	0	#N/A	2	54	99.8209	37.2841	194.769	35.4291	#N/A	#N/A	15.48	75	32.2	630160000	1175	53.46	18.1	0		0	0	KxKxx	0	0	0	0	cytoplasm:endoplasmic reticulum	endoplasmic reticulum	0	cytoplasm	#N/A	#N/A	#N/A	0	01
YDL091C	UBX3	Clathrin-coated vesicle component, regulator of endocytosis; copurifies with the DSC ubiquitin ligase complex; UBX (ubiquitin regulatory X) domain-containing protein that interacts with Cdc48p; required for efficient clathrin-mediated endocytosis; ortholog of fission yeast Ucp10	01_03_41	1B21	13_H_08	SWAT	ER,punctate	ER,punctate	punctate	punctate	below threshold	Same	2	0	0	#N/A	1	55	77.6093	21.4065	102.042	31.7591	#N/A	#N/A	#N/A	#N/A	6	4293800	7	24.23	8.9	0		0	0	0	0	0	0	0	cytoplasm	0	cytoplasm	cytoplasm	#N/A	3.5	#N/A	ENSG00000113194	01
YGR175C	ERG1	Squalene epoxidase; catalyzes the epoxidation of squalene to 2,3-oxidosqualene; plays an essential role in the ergosterol-biosynthesis pathway and is the specific target of the antifungal drug terbinafine; human SQLE functionally complements the lethality of the erg1 null mutation	01_03_42	2B21	01_C_08	SWAT	ER,punctate	ER,punctate	ER,punctate	ER	ER,punctate	Same	2	0	0	#N/A	2	443	133.924	75.8276	61.6868	39.5521	#N/A	#N/A	137.3	1540	286.3	10459000000	40	445.71	#N/A	Lipid droplet		0	0	0	0	0	0	0	endoplasmic reticulum:lipid particle	endoplasmic reticulum:lipid particle	endoplasmic reticulum	0	inviable	#N/A	#N/A	ENSG00000104549	01
YDR216W	ADR1	Carbon source-responsive zinc-finger transcription factor; required for transcription of the glucose-repressed gene ADH2, of peroxisomal protein genes, and of genes required for ethanol, glycerol, and fatty acid utilization	01_03_43	1B22	11_E_06	SWAT	cytosol	cytosol	cytosol	cytosol	cytosol	Same	1	0	0	#N/A	1	764	59.7755	30.7681	48.5382	41.9283	#N/A	#N/A	22.11	#N/A	1.6	1313800000	58	17.63	7.8	0		0	0	0	0	0	0	0	cytoplasm:nucleus	nucleus	nucleus	cytoplasm	#N/A	#N/A	#N/A	0	01
YHR195W	NVJ1	Nuclear envelope protein; anchored to the nuclear inner membrane, that interacts with the vacuolar membrane protein Vac8p to promote formation of nucleus-vacuole junctions during piecemeal microautophagy of the nucleus (PMN)	01_03_44	2B22	15_E_02	SWAT	ER,punctate	cell periphery,vacuole membrane	punctate	nucleus,punctate	#N/A	Same	2	0	6	0	2	6	46.6931	22.6443	74.6136	#N/A	#N/A	#N/A	15.18	#N/A	13	750910000	5	34.96	9.2	0		0	0	0	0	0	0	0	nuclear membrane:nucleus	nuclear membrane	nuclear membrane:nucleus	0	#N/A	3	#N/A	0	01
YDL093W	PMT5	Protein O-mannosyltransferase; transfers mannose residues from dolichyl phosphate-D-mannose to protein serine/threonine residues; acts in a complex with Pmt3p, can instead interact with Pmt2p in some conditions; target for new antifungals	01_03_45	1B23	06_F_02	SWAT	ER	ER,vacuole	ER	below threshold	below threshold	New	1	0	0	#N/A	11	47	83.4207	27.9087	132.136	30.9123	#N/A	#N/A	15.52	#N/A	10.8	#N/A	#N/A	46.7	9.3	0		0	0	0	0	0	0	0	endoplasmic reticulum	0	endoplasmic reticulum	0	#N/A	#N/A	12	0	01
YGR177C	ATF2	Alcohol acetyltransferase; may play a role in steroid detoxification; forms volatile esters during fermentation, which is important for brewing and winemaking	01_03_46	2B23	11_E_03	SWAT	missing	ER,punctate	ER	ER	cytosol	Same	1	0	0	#N/A	0	None	#N/A	31.3199	145.869	31.4549	#N/A	#N/A	17.05	#N/A	18	10729000	118	52.62	13.2	0		0	0	0	0	0	0	0	cytoplasm:endoplasmic reticulum	endoplasmic reticulum	0	cytoplasm:endoplasmic reticulum	#N/A	#N/A	#N/A	0	01
YDR218C	SPR28	Sporulation-specific homolog of the CDC3/10/11/12 family of genes; meiotic septin expressed at high levels during meiotic divisions and ascospore formation; the yeast CDC3/10/11/12 family is a family of bud neck microfilament genes	01_03_47	1B24	28_D_9	SWAT	cytosol	cytosol	below threshold	below threshold	cytosol,punctate	New	1	0	0	#N/A	0	None	88.9229	16.4983	115.075	39.9366	#N/A	#N/A	15.81	#N/A	0.3	#N/A	#N/A	0.81	#N/A	0		0	0	0	0	0	0	0	bud neck/tip:spindle pole body	bud neck/tip:spindle pole body	bud neck/tip	bud neck/tip	#N/A	#N/A	#N/A	0	01
YHR213W-A	YHR213W-A	Putative protein of unknown function; identified by gene-trapping, microarray-based expression analysis, and genome-wide homology searching	01_03_48	2B24	12_H_12	SWAT	below threshold	below threshold	below threshold	missing	#N/A	0	0	0	0	#N/A	1	20	13.8262	18.692	5.41653	24.2671	#N/A	#N/A	#N/A	#N/A	0	#N/A	#N/A	#N/A	#N/A	0		0	0	0	0	0	0	0	cellular_component:integral component of membrane:membrane	0	0	0	#N/A	#N/A	#N/A	0	01
YLR081W	GAL2	Galactose permease; required for utilization of galactose; also able to transport glucose	01_04_01	3B1	05_A_07	SWAT	cell periphery	missing	below threshold	below threshold	cell periphery	New	1	0	0	#N/A	12	68	50.4017	14.9042	0	37.5474	#N/A	#N/A	17.59	#N/A	0.4	#N/A	#N/A	0.6	#N/A	0		0	0	0	0	0	0	0	cell periphery	cell periphery	0	0	#N/A	3	#N/A	ENSG00000160326	01
YOR084W	LPX1	Peroxisomal matrix-localized lipase; required for normal peroxisome morphology; contains a peroxisomal targeting signal type 1 (PTS1) and a lipase motif; peroxisomal import requires the PTS1 receptor, Pex5p and self-interaction; transcriptionally activated by Yrm1p along with genes involved in multidrug resistance; oleic acid inducible	01_04_02	4B1	28_F_2	SWAT	punctate	punctate	punctate	ambiguous	#N/A	New	1	0	0	#N/A	0	None	110.74	19.3218	100.353	#N/A	#N/A	#N/A	#N/A	#N/A	0	#N/A	63	34.46	9.9	Peroxisome	predicted PTS1 (by Peroxisome DB)	0	0	0	0	0	0	1	peroxisome	peroxisome	peroxisome	0	#N/A	#N/A	#N/A	0	01
Control-his3d-SWAT	None	#N/A	01_04_03	3B2	#N/A	SWAT	cytosol	cytosol	below threshold	#N/A	missing	#N/A	#N/A	0	#N/A	#N/A	#N/A	#N/A	193.169	15.6212	161.694	#N/A	#N/A	#N/A	#N/A	#N/A	#N/A	#N/A	#N/A	#N/A	#N/A	#N/A	#N/A	0	0	#N/A	0	0	0	0	#N/A	#N/A	#N/A	#N/A	#N/A	#N/A	#N/A	#N/A	01
Control-his3d-SWAT	None	#N/A	01_04_04	4B2	#N/A	SWAT	cytosol	cytosol	below threshold	#N/A	missing	#N/A	#N/A	0	#N/A	#N/A	#N/A	#N/A	194.556	20.4407	145.11	#N/A	#N/A	#N/A	#N/A	#N/A	#N/A	#N/A	#N/A	#N/A	#N/A	#N/A	#N/A	0	0	#N/A	0	0	0	0	#N/A	#N/A	#N/A	#N/A	#N/A	#N/A	#N/A	#N/A	01
YLR087C	CSF1	Protein required for fermentation at low temperature; plays a role in the maturation of secretory proteins; the authentic, non-tagged protein is detected in highly purified mitochondria in high-throughput studies	01_04_05	3B3	04_D_12	SWAT	punctate	punctate	cytosol	missing	#N/A	New	1	0	0	#N/A	1	20	20.5772	22.1617	13.0879	#N/A	#N/A	#N/A	#N/A	#N/A	1	5856600	#N/A	36.72	7.7	0		0	0	0	0	0	0	0	mitochondria	0	0	mitochondria	#N/A	#N/A	#N/A	ENSG00000138688	01
YOR086C	TCB1	Lipid-binding ER protein involved in ER-plasma membrane tethering; one of 6 proteins (Ist2p, Scs2p, Scs22p, Tcb1p, Tcb2p, Tcb3p) that connect ER to plasma membrane and regulate PI4P levels by controlling access of Sac1p phosphatase to its substrate PI4P in PM; contains 3 calcium and lipid binding domains; non-tagged protein also localizes to mitochondria; C-termini of Tcb1p, Tcb2p and Tcb3p inter…	01_04_06	4B3	28_B_5	SWAT	ER	cell periphery,ER	cell periphery,punctate	cell periphery	ER	Same	2	0	0	#N/A	2	107	140.586	22.2617	129.929	48.5938	#N/A	#N/A	55.81	509	21.5	11074000000	318	143.16	10.4	0		0	0	0	0	0	0	0	cell periphery:endoplasmic reticulum:mitochondria	endoplasmic reticulum	cell periphery	cell periphery:mitochondria	#N/A	#N/A	#N/A	0	01
Control-his3d-GFPdC	None	#N/A	01_04_07	3B4	#N/A	SWAT	below threshold	below threshold	below threshold	#N/A	missing	#N/A	#N/A	0	#N/A	#N/A	#N/A	#N/A	10.9799	19.672	#N/A	#N/A	#N/A	#N/A	#N/A	#N/A	#N/A	#N/A	#N/A	#N/A	#N/A	#N/A	#N/A	0	0	#N/A	0	0	0	0	#N/A	#N/A	#N/A	#N/A	#N/A	#N/A	#N/A	#N/A	01
Control-his3d-GFPdC	None	#N/A	01_04_08	4B4	#N/A	SWAT	below threshold	below threshold	below threshold	#N/A	missing	#N/A	#N/A	0	#N/A	#N/A	#N/A	#N/A	13.3499	14.1696	#N/A	#N/A	#N/A	#N/A	#N/A	#N/A	#N/A	#N/A	#N/A	#N/A	#N/A	#N/A	#N/A	0	0	#N/A	0	0	0	0	#N/A	#N/A	#N/A	#N/A	#N/A	#N/A	#N/A	#N/A	01
YLR088W	GAA1	Subunit of the GPI:protein transamidase complex; removes the GPI-anchoring signal and attaches GPI (glycosylphosphatidylinositol) to proteins in the ER; human homolog GPAA1 can complement growth defects of yeast thermosensitive mutant at restrictive temperature	01_04_09	3B5	07_B_06	SWAT	ER	ER,punctate	ER	ER	ER	Same	1	0	0	#N/A	7	20	78.7233	25.4217	124.667	33.3662	#N/A	#N/A	23.07	#N/A	22.3	10131000	52	77.43	14.2	0		0	0	KxKxx	0	0	0	0	endoplasmic reticulum	0	endoplasmic reticulum	0	inviable	#N/A	#N/A	ENSG00000197858	01
YOR087W	YVC1	Vacuolar cation channel; mediates release of Ca(2+) from the vacuole in response to hyperosmotic shock	01_04_10	4B5	07_B_03	SWAT	vacuole membrane	ER,vacuole	vacuole membrane	ER,cytosol	punctate	Different	1	0	0	#N/A	7	238	156.133	35.3689	121.251	36.7551	#N/A	#N/A	16.13	169	9.3	558890000	#N/A	46.81	11.2	0		0	0	KxKxx	0	0	0	0	vacuolar membrane:vacuole	vacuolar membrane:vacuole	vacuolar membrane:vacuole	0	#N/A	#N/A	#N/A	0	01
Control-URA+	None	#N/A	01_04_11	3B6	#N/A	SWAT	below threshold	missing	missing	#N/A	#N/A	#N/A	#N/A	0	#N/A	#N/A	#N/A	#N/A	11.4091	#N/A	#N/A	#N/A	#N/A	#N/A	#N/A	#N/A	#N/A	#N/A	#N/A	#N/A	#N/A	#N/A	#N/A	0	0	#N/A	0	0	0	0	#N/A	#N/A	#N/A	#N/A	#N/A	#N/A	#N/A	#N/A	01
Control-URA+	None	#N/A	01_04_12	4B6	#N/A	SWAT	below threshold	missing	missing	#N/A	#N/A	#N/A	#N/A	0	#N/A	#N/A	#N/A	#N/A	12.5463	0	#N/A	#N/A	#N/A	#N/A	#N/A	#N/A	#N/A	#N/A	#N/A	#N/A	#N/A	#N/A	#N/A	0	0	#N/A	0	0	0	0	#N/A	#N/A	#N/A	#N/A	#N/A	#N/A	#N/A	#N/A	01
YLR092W	SUL2	High affinity sulfate permease; sulfate uptake is mediated by specific sulfate transporters Sul1p and Sul2p, which control the concentration of endogenous activated sulfate intermediates	01_04_13	3B7	03_F_12	SWAT	ambiguous	vacuole	below threshold	cytosol	below threshold	Different	1	0	0	#N/A	9	223	23.4293	16.4535	9.77315	25.2891	#N/A	#N/A	19.49	#N/A	1.3	#N/A	#N/A	5.62	8.8	0		0	0	0	0	0	0	0	cell periphery	cell periphery	0	cell periphery	#N/A	#N/A	#N/A	ENSG00000181045	01
YOR089C	VPS21	Endosomal Rab family GTPase; required for endocytic transport and sorting of vacuolar hydrolases; required for endosomal localization of the CORVET complex; required with YPT52 for MVB biogenesis and sorting; involved in autophagy and ionic stress tolerance; geranylgeranylation required for membrane association; protein abundance increases in response to DNA replication stress; mammalian Rab5 hom…	01_04_14	4B7	13_A_05	SWAT	punctate	punctate	punctate	nucleus,cytosol	punctate	Different	1	0	0	#N/A	0	None	97.174	66.087	160.365	47.1528	#N/A	#N/A	#N/A	#N/A	90.4	2649700000	#N/A	78.51	8.1	0		0	0	0	0	0	1	0	endosome:mitochondria	endosome	endosome:mitochondria	mitochondria	#N/A	#N/A	#N/A	ENSG00000080371	01
YML047C	PRM6	Potassium transporter that mediates K+ influx; activates high-affinity Ca2+ influx system (HACS) during mating pheromone response; expression up-regulated in response to alpha factor; regulated by Ste12p during mating; localized to sites of polarized growth; member of a fungal-specific gene family; PRM6 has a paralog, KCH1, that arose from the whole genome duplication	01_04_15	3B8	12_C_09	SWAT	vacuole	vacuole	below threshold	below threshold	below threshold	New	1	0	0	#N/A	4	29	20.8414	19.7728	23.8593	25.0028	#N/A	#N/A	14.25	#N/A	0	#N/A	#N/A	0.7	#N/A	0		0	0	KxKxx	0	0	0	0	bud neck/tip:cell periphery	bud neck/tip:cell periphery	0	0	#N/A	#N/A	#N/A	0	01
YPL098C	MGR2	Subunit of the TIM23 translocase complex; acts to couple Tim21p with the core Tim23 translocase; provides quality control for insertion of membrane proteins by regulating their release into the inner membrane by the TIM23 complex; absolutely required for mitochondrial import of presequence-containing proteins at elevated temperature; required for viability of cells lacking the mitochondrial genom…	01_04_16	4B8	08_E_05	SWAT	mitochondria	mitochondria	mitochondria	missing	mitochondria	New	1	0	0	#N/A	2	21	99.8708	25.0237	104.431	30.1107	#N/A	#N/A	#N/A	#N/A	176.4	54994000	#N/A	135.01	59.8	0		0	0	0	0	0	0	0	mitochondria	mitochondria	0	0	#N/A	#N/A	#N/A	0	01
YLR093C	NYV1	v-SNARE component of the vacuolar SNARE complex; involved in vesicle fusion; inhibits ATP-dependent Ca(2+) transport activity of Pmc1p in the vacuolar membrane	01_04_17	3B9	03_B_06	SWAT	vacuole membrane	vacuole membrane	vacuole membrane	vacuole	vacuole membrane	Different	1	0	0	#N/A	1	232	28.6554	32.5205	53.9852	39.6225	#N/A	#N/A	#N/A	#N/A	75.8	1296200000	46	98.43	17.7	Tail Anchored		1	0	0	0	0	0	0	vacuolar membrane:vacuole	vacuolar membrane	vacuolar membrane:vacuole	0	#N/A	#N/A	#N/A	0	01
YOR092W	ECM3	Non-essential protein of unknown function; involved in signal transduction and the genotoxic response; induced rapidly in response to treatment with 8-methoxypsoralen and UVA irradiation; relocalizes from ER to cytoplasm upon DNA replication stress; ECM3 has a paralog, YNL095C, that arose from the whole genome duplication	01_04_18	4B9	06_H_11	SWAT	ER	ER	below threshold	ER	below threshold	Same	1	0	0	#N/A	10	20	25.506	21.5906	10.2491	23.6888	#N/A	#N/A	17.22	#N/A	9.6	12771000	3	38.05	7.5	0		0	0	0	0	0	0	0	cytoplasm:endoplasmic reticulum	0	endoplasmic reticulum	cytoplasm:endoplasmic reticulum	#N/A	#N/A	#N/A	0	01
YML048W	GSF2	Endoplasmic reticulum (ER) localized integral membrane protein; may promote secretion of certain hexose transporters, including Gal2p; involved in glucose-dependent repression	01_04_19	3B10	04_E_10	SWAT	ER	ER	ER	ER	ER	Same	1	0	0	#N/A	1	181	184.092	55.0089	262.805	48.9437	#N/A	#N/A	#N/A	#N/A	92.3	6490200000	108	244.73	11.5	0		0	0	KKxx	0	0	0	0	cytoplasm:endoplasmic reticulum:mitochondria	endoplasmic reticulum	endoplasmic reticulum	cytoplasm:mitochondria	#N/A	#N/A	#N/A	0	01
YPL099C	INA17	F1F0 ATPase synthase peripheral stalk assembly factor; subunit of the matrix-exposed inner mitochondrial membrane localized INA complex (Ina22p-Ina17p) involved in assembly of the F1F0 peripheral stalk; co-purifies with Ina22p and ATP synthase subunits; null mutant displays elevated frequency of mitochondrial genome loss and has a respiratory growth defect	01_04_20	4B10	14_B_10	SWAT	punctate,mitochondria	punctate	below threshold	below threshold	below threshold	New	2	0	0	#N/A	1	108	36.6032	21.1518	20.7713	24.9528	#N/A	#N/A	15.02	#N/A	34	385980000	#N/A	35.96	34.4	0		0	0	0	0	0	0	0	mitochondria	mitochondria	mitochondria	mitochondria	#N/A	#N/A	#N/A	0	01
YLR100W	ERG27	3-keto sterol reductase; catalyzes the last of three steps required to remove two C-4 methyl groups from an intermediate in ergosterol biosynthesis; mutants are sterol auxotrophs; mutation is functionally complemented by human HSD17B7	01_04_21	3B11	01_H_11	SWAT	ER,punctate	ER,punctate	punctate	punctate	ER,punctate	Same	2	0	0	#N/A	1	243	119.937	44.9808	223.333	46.0157	#N/A	#N/A	54.76	197.5	113	7966100000	32	229.9	21.2	Lipid droplet		0	0	0	0	0	0	0	endoplasmic reticulum:lipid particle:mitochondria	endoplasmic reticulum:lipid particle	endoplasmic reticulum:lipid particle	mitochondria	inviable	#N/A	#N/A	ENSG00000132196	01
YOR093C	CMR2	Putative protein of unknown function; deletion causes sensitivity to unfolded protein response-inducing agents	01_04_22	4B11	11_H_04	SWAT	cytosol,bud	cytosol,bud neck	below threshold	below threshold	below threshold	New	2	0	0	#N/A	3	228	30.7161	16.8468	20.4773	26.0336	#N/A	#N/A	19.25	#N/A	2.8	10425000	#N/A	29.42	7.5	0		0	0	0	0	0	0	0	nucleus	0	nucleus	0	#N/A	#N/A	#N/A	ENSG00000160305	01
YML052W	SUR7	Plasma membrane protein, component of eisosomes; long-lived protein that remains stable in eisosomes of mother cells while other eisosome proteins, Pil1p and Lsp1p, turn over; may function to anchor the eisosome in place; sporulation and plasma membrane sphingolipid content are altered in mutants; localizes to furrow-like invaginations (MCC patches)	01_04_23	3B12	14_C_06	SWAT	cell periphery,punctate	cell periphery,punctate	cell periphery,punctate	punctate	below threshold	Same	2	0	0	#N/A	4	7	80.8588	61.2572	105.939	27.6904	#N/A	#N/A	13.99	#N/A	89.8	131160000	207	209.57	8.9	0		0	0	0	0	0	0	0	cell periphery:eisosome:mitochondria	cell periphery:eisosome	cell periphery	mitochondria	#N/A	3.5	8	0	01
YPL100W	ATG21	Phosphoinositide binding protein; required for vesicle formation in the cytoplasm-to-vacuole targeting (Cvt) pathway; binds both phosphatidylinositol (3,5)-bisphosphate and phosphatidylinositol 3-phosphate; WD-40 repeat protein	01_04_24	4B12	11_D_08	SWAT	punctate,vacuole membrane	punctate,vacuole membrane	vacuole membrane	punctate	below threshold	Same	2	0	0	#N/A	0	None	103.912	36.0617	74.7975	33.0096	#N/A	#N/A	26.03	#N/A	13.6	59278000	56	28.08	13.9	0		0	0	0	0	0	0	0	autophagosome:cytoplasm:endosome:vacuolar membrane:vacuole	cytoplasm:endosome:vacuolar membrane	autophagosome:cytoplasm:vacuole	0	#N/A	#N/A	#N/A	0	01
YLR109W	AHP1	Thiol-specific peroxiredoxin; reduces hydroperoxides to protect against oxidative damage; function in vivo requires covalent conjugation to Urm1p	01_04_25	3B13	02_H_11	SWAT	cytosol	cytosol	cytosol	nucleus,cytosol	cytosol	Same	1	0	0	#N/A	0	None	236.16	23.8997	340.777	74.2408	#N/A	#N/A	2851.58	17974.2	4193.5	147000000000	300	5109.64	#N/A	Peroxisome	predicted PTS1 (by Peroxisome DB)	0	0	0	0	0	0	1	cell periphery:cytoplasm	cytoplasm	cytoplasm	cell periphery	#N/A	#N/A	#N/A	ENSG00000126432	01
YOR094W	ARF3	Glucose-repressible ADP-ribosylation factor; GTPase of Ras superfamily involved in regulating cell polarity and invasive growth; localizes to dynamic spots at plasma membrane and modulates PtdIns(4,5)P2 levels to facilitate endocytosis; required for localization of endocytic protein Lsb5p to correct cortical site in cells; also has mRNA binding activity; homolog of mammalian Arf6	01_04_26	4B13	10_C_11	SWAT	cytosol	cytosol	cytosol,cell periphery	cell periphery	cytosol	Different	1	0	0	#N/A	0	None	112.824	41.9579	150.855	43.3408	#N/A	#N/A	15.33	208	64.8	354720000	#N/A	35.5	20.2	0		0	0	0	0	0	1	0	Golgi:bud neck/tip	bud neck/tip	Golgi	0	#N/A	#N/A	#N/A	ENSG00000273003	01
YML054C	CYB2	Cytochrome b2 (L-lactate cytochrome-c oxidoreductase); component of the mitochondrial intermembrane space, required for lactate utilization; expression is repressed by glucose and anaerobic conditions	01_04_27	3B14	02_E_10	SWAT	cytosol,nucleus	cytosol,nucleus	below threshold	below threshold	below threshold	New	1	0	0	#N/A	1	54	47.2518	21.795	54.5196	24.669	#N/A	#N/A	17.23	#N/A	0.5	#N/A	54	4.16	8.5	Peroxisome	0	0	0	0	0	0	0	0	mitochondria	mitochondria	mitochondria	mitochondria	#N/A	#N/A	8	ENSG00000101323	01
YPL112C	PEX25	Peripheral peroxisomal membrane peroxin; required for the regulation of peroxisome size and maintenance, recruits GTPase Rho1p to peroxisomes, induced by oleate, interacts with Pex27p; PEX25 has a paralog, PEX27, that arose from the whole genome duplication	01_04_28	4B14	02_F_08	SWAT	punctate	punctate,mitochondria	punctate	punctate	punctate	Same	1	0	0	#N/A	1	364	73.086	46.852	64.5046	27.4646	#N/A	#N/A	#N/A	130	34.5	404340000	180	86.44	16.1	Peroxisome	0	0	0	0	0	0	0	0	peroxisome	peroxisome	peroxisome	0	#N/A	#N/A	#N/A	0	01
YLR114C	AVL9	Conserved protein involved in exocytic transport from the Golgi; mutation is synthetically lethal with apl2 vps1 double mutation; member of a protein superfamily with orthologs in diverse organisms; relocalizes from bud neck to cytoplasm upon DNA replication stress	01_04_29	3B15	13_E_09	SWAT	punctate,bud neck	punctate,bud neck	bud neck	cytosol	bud neck	Different	1	0	0	#N/A	0	None	57.9707	32.2181	68.7695	44.7433	#N/A	#N/A	NA	200.5	10.7	1984000000	112	67.06	10.9	0		0	0	0	0	0	0	0	bud neck/tip:cytoplasm	0	cytoplasm	bud neck/tip:cytoplasm	#N/A	1.5	#N/A	ENSG00000105778	01
YLR069C	MEF1	Mitochondrial elongation factor involved in translational elongation	01_04_30	4B15	14_B_03	Blank	Blank	Blank	Blank	Remove	Remove	Blank	Remove	Remove	Remove	Remove	Remove	Remove	Remove	Remove	Remove	Remove	Remove	Remove	Remove	Remove	Remove	Remove	Remove	Remove	Remove	Remove	Remove	0	0	Remove	0	0	0	0	Remove	Remove	Remove	Remove	Remove	Remove	Remove	Remove	01
YML055W	SPC2	Subunit of signal peptidase complex; complex catalyzes cleavage of N-terminal signal sequences of proteins targeted to the secretory pathway; homologous to mammalian SPC25; other members of the complex are Spc1p, Spc1p, and Sec11p	01_04_31	3B16	08_G_07	SWAT	ER	ER	ER	ER	ER	Same	1	0	0	#N/A	2	41	116.149	21.0517	138.111	39.1458	#N/A	#N/A	42.06	325.3	58.7	1984700000	76	87.65	177.6	0		0	0	KKxx	0	0	0	0	endoplasmic reticulum	0	endoplasmic reticulum	0	#N/A	#N/A	#N/A	0	01
YPL117C	IDI1	Isopentenyl diphosphate:dimethylallyl diphosphate isomerase; catalyzes an essential activation step in the isoprenoid biosynthetic pathway; required for viability; isopentenyl diphosphate:dimethylallyl diphosphate isomerase is also known as IPP isomerase	01_04_32	4B16	02_G_11	SWAT	cytosol	cytosol	cytosol	nucleus,cytosol	cytosol	Same	1	0	0	#N/A	0	None	202.255	101.344	241.095	66.5092	#N/A	#N/A	106.41	534	198.5	13707000000	136	177.55	27.1	Peroxisome	0	0	0	0	0	0	0	0	cytoplasm:nucleus	0	cytoplasm	cytoplasm:nucleus	inviable	#N/A	#N/A	ENSG00000067064	01
YLR119W	SRN2	Component of the ESCRT-I complex; ESCRT-I is involved in ubiquitin-dependent sorting of proteins into the endosome; suppressor of rna1-1 mutation; may be involved in RNA export from nucleus	01_04_33	3B17	28_C_9	SWAT	nucleus	nucleus	below threshold	below threshold	below threshold	New	1	0	0	#N/A	0	None	40.7774	23.1166	15.1621	26.4054	#N/A	#N/A	17.74	#N/A	28.1	486090000	66	22.18	25.3	0		0	0	0	0	0	0	0	cytoplasm:endosome	endosome	cytoplasm:endosome	0	#N/A	#N/A	#N/A	0	01
YOR099W	KTR1	Alpha-1,2-mannosyltransferase; involved in O- and N-linked protein glycosylation; type II membrane protein; member of the KRE2/MNT1 mannosyltransferase family; relocalizes from vacuole to cytoplasm upon DNA replication stress	01_04_34	4B17	15_E_01	SWAT	punctate,vacuole membrane	ER,vacuole	vacuole	vacuole	below threshold	Same	3	0	5	0	0	None	169.726	53.129	254.012	28.4473	#N/A	#N/A	#N/A	#N/A	99.4	3830900000	3	262.6	27.5	Bearing Signal Sequence		0	0	0	0	0	0	0	Golgi:vacuolar membrane	Golgi	Golgi	vacuolar membrane	#N/A	#N/A	#N/A	0	01
YML059C	NTE1	Serine esterase; homolog of human neuropathy target esterase (NTE); Nte1p-mediated phosphatidylcholine turnover influences transcription factor Opi1p localization, affecting transcriptional regulation of phospholipid biosynthesis genes	01_04_35	3B18	01_H_07	SWAT	punctate,bud	cell periphery,punctate,bud neck	below threshold	ER	punctate	Same	2	0	0	#N/A	4	51	57.4184	19.1263	38.8495	30.1849	#N/A	#N/A	23.85	102	4.1	615710000	#N/A	52.2	7.8	Lipid droplet		0	0	0	0	0	0	0	endoplasmic reticulum	endoplasmic reticulum	endoplasmic reticulum	endoplasmic reticulum	#N/A	#N/A	8	ENSG00000032444	01
YPL119C-A	YPL119C-A	Putative protein of unknown function; identified by expression profiling and mass spectrometry	01_04_36	4B18	09_E_04	SWAT	below threshold	below threshold	below threshold	missing	#N/A	0	0	0	0	#N/A	1	20	13.7065	19.8725	4.38453	24.0727	#N/A	#N/A	#N/A	#N/A	0	#N/A	#N/A	#N/A	11.8	0		0	0	0	0	0	0	0	cellular_component:integral component of membrane:membrane	0	0	0	#N/A	#N/A	#N/A	0	01
YOL009C	MDM12	Mitochondrial outer membrane protein, ERMES complex subunit; required for transmission of mitochondria to daughter cells; required for mitophagy; may influence import and assembly of outer membrane beta-barrel proteins; ERMES complex is often co-localized with peroxisomes and with concentrated areas of pyruvate dehydrogenase	01_04_37	3B19	29_A_4	SWAT	cytosol,punctate	cytosol,nucleus	punctate	mitochondria	below threshold	Different	2	0	0	#N/A	0	None	51.1581	22.9826	79.7558	25.03	12.8109	10.4975	16.48	#N/A	14.3	#N/A	24	13.26	17.7	Mitochondria outer membrane		0	0	0	0	0	0	0	ERMES complex:cell periphery:cytoplasm:endoplasmic reticulum:mitochondria:nucleus	ERMES complex:mitochondria	ERMES complex:endoplasmic reticulum:mitochondria	cell periphery:cytoplasm:mitochondria:nucleus	#N/A	#N/A	#N/A	0	01
YOR101W	RAS1	GTPase involved in G-protein signaling in adenylate cyclase activation; plays a role in cell proliferation; localized to the plasma membrane; homolog of mammalian RAS proto-oncogenes; relative distribution to the nucleus increases upon DNA replication stress; RAS1 has a paralog, RAS2, that arose from the whole genome duplication	01_04_38	4B19	01_G_01	SWAT	cell periphery	cell periphery	cell periphery	nucleus,cytosol	cell periphery	Different	1	0	0	#N/A	0	None	101.988	40.7612	130.721	42.2977	#N/A	#N/A	#N/A	#N/A	70.2	2089800000	106	75.02	8.8	Farnesylation		0	0	0	1	1	1	0	cell periphery:cytoplasm:nucleus	cell periphery	cell periphery	cytoplasm:nucleus	#N/A	#N/A	#N/A	ENSG00000006451	01
YML064C	TEM1	GTP-binding protein of the Ras superfamily; involved in termination of M-phase; controls actomyosin and septin dynamics during cytokinesis	01_04_39	3B20	16_B_04	SWAT	cytosol,punctate	cytosol,nucleus	punctate	punctate,punctate	below threshold	Same	1	0	0	#N/A	1	82	36.7579	29.1858	35.9684	31.3569	#N/A	#N/A	17.97	#N/A	32.2	#N/A	26	29.93	8.2	0		0	0	0	0	0	1	0	spindle pole body	0	0	0	inviable	#N/A	#N/A	ENSG00000157869	01
YPL120W	VPS30	Subunit of phosphatidylinositol (PtdIns) 3-kinase complexes I and II; Complex I is essential in autophagy, Complex II is required for vacuolar protein sorting; required for overflow degradation of misfolded proteins when ERAD is saturated; C-terminus has novel globular fold essential for autophagy through the targeting of the PI3-kinase complex I to the pre-autophagosomal structure; ortholog of h…	01_04_40	4B20	13_B_08	SWAT	cytosol	cytosol	punctate	vacuole	cytosol	Different	1	0	0	#N/A	0	None	54.4719	25.4244	59.6747	29.8133	#N/A	#N/A	15.41	#N/A	9.5	151940000	24	24.12	7.1	0		0	0	0	0	0	0	0	autophagosome:cytoplasm:endosome:vacuolar membrane:vacuole	cytoplasm	autophagosome:endosome:vacuolar membrane:vacuole	vacuolar membrane	#N/A	#N/A	#N/A	ENSG00000126581	01
YLR130C	ZRT2	Low-affinity zinc transporter of the plasma membrane; transcription is induced under low-zinc conditions by the Zap1p transcription factor	01_04_41	3B21	04_C_04	SWAT	ER	ER	ER	ER	below threshold	Same	1	0	0	#N/A	7	28	43.7727	25.8043	31.0079	25.0914	#N/A	#N/A	21.44	#N/A	8.1	17453000	55	64.96	#N/A	0		0	0	0	0	0	0	0	cell periphery	cell periphery	0	0	#N/A	#N/A	#N/A	0	01
YOR104W	PIN2	Exomer-dependent cargo protein; induces appearance of [PIN+] prion when overproduced; prion-like domain serves as a retention signal in the trans-Golgi network; predicted to be palmitoylated	01_04_42	4B21	02_C_03	SWAT	vacuole membrane	vacuole	ambiguous,punctate	cell periphery	below threshold	Different	1	0	0	#N/A	1	43	48.8778	20.6739	44.0364	23.4089	#N/A	#N/A	31.58	127.5	22.2	49928000	69	26.88	14.7	Palmitoylation		0	0	0	1	0	0	0	bud neck/tip:cell periphery	bud neck/tip:cell periphery	0	0	#N/A	#N/A	#N/A	0	01
YML066C	SMA2	Meiosis-specific prospore membrane protein; required to produce bending force necessary for proper assembly of the prospore membrane during sporulation	01_04_43	3B22	28_C_2	SWAT	punctate,vacuole	cell periphery,punctate,vacuole	below threshold	below threshold	below threshold	New	2	0	0	#N/A	4	7	33.5695	21.0197	50.469	23.9459	#N/A	#N/A	13.78	#N/A	0.4	#N/A	#N/A	0.4	#N/A	0		0	0	0	0	0	0	0	cytoplasm:endoplasmic reticulum	cytoplasm	endoplasmic reticulum	0	#N/A	#N/A	#N/A	0	01
YPL123C	RNY1	Vacuolar RNase of the T(2) family; relocalizes to the cytosol where it cleaves tRNAs upon oxidative or stationary phase stress; required for tRNA-specific translational pausing suring oxidative stress; promotes apoptosis under stress conditions and this function is independent of Rny1p catalytic activity	01_04_44	4B22	10_F_08	SWAT	cytosol,punctate	cytosol	below threshold	below threshold	below threshold	New	2	0	0	#N/A	0	None	37.9096	19.828	14.9526	23.9135	#N/A	#N/A	15.94	#N/A	9.4	229560000	#N/A	13.95	19.6	0		0	0	0	0	0	0	0	cell periphery:cytoplasm:vacuole	cell periphery:cytoplasm:vacuole	cytoplasm:vacuole	0	#N/A	#N/A	#N/A	0	01
YLR138W	NHA1	Na+/H+ antiporter; involved in sodium and potassium efflux through the plasma membrane; required for alkali cation tolerance at acidic pH	01_04_45	3B23	06_G_09	SWAT	ER	ER	ER	cell periphery	below threshold	Different	1	0	0	#N/A	13	14	53.6322	27.7204	47.3826	28.0091	#N/A	#N/A	15.15	130.9	10	243490000	300	77.14	9	0		0	0	0	0	0	0	0	cell periphery	cell periphery	0	0	#N/A	#N/A	#N/A	0	01
YOR106W	VAM3	Syntaxin-like vacuolar t-SNARE; functions with Vam7p in vacuolar protein trafficking; mediates docking/fusion of late transport intermediates with the vacuole; has an acidic di-leucine sorting signal and C-terminal transmembrane region	01_04_46	4B23	01_F_12	SWAT	vacuole membrane	vacuole membrane	vacuole membrane	missing	#N/A	New	1	0	0	#N/A	1	265	65.1948	26.9847	70.8879	0	#N/A	#N/A	#N/A	#N/A	18	148410000	13	33.74	8	Palmitoylation		0	0	0	1	0	0	0	vacuolar membrane:vacuole	vacuolar membrane	vacuolar membrane:vacuole	0	inviable	1	#N/A	0	01
YML067C	ERV41	Protein localized to COPII-coated vesicles; forms a complex with Erv46p; involved in the membrane fusion stage of transport; has homology to human ERGIC2 (PTX1) protein	01_04_47	3B24	04_E_09	SWAT	cytosol,punctate	cytosol	punctate	ER	below threshold	Different	1	0	0	#N/A	2	21	62.6946	35.6028	56.8516	24.6731	#N/A	#N/A	43.58	189.5	39.7	1625000000	166	116.88	28.9	0		0	0	0	0	0	0	0	COPII vesicle:Golgi:endoplasmic reticulum:endoplasmic reticulum-Golgi intermediate compartment	COPII vesicle:Golgi:endoplasmic reticulum	Golgi:endoplasmic reticulum:endoplasmic reticulum-Golgi intermediate compartment	0	#N/A	#N/A	#N/A	0	01
YPL137C	GIP3	Cytoplasmic protein that regulates protein phosphatase 1 Glc7p; overexpression relocalizes Glc7p from the nucleus and prevents chromosome segregation; may interact with ribosomes, based on co-purification experiments; GIP3 has a paralog, HER1, that arose from the whole genome duplication	01_04_48	4B24	09_D_01	SWAT	cytosol	cytosol	below threshold	ER,cytosol	cytosol	Same	1	0	0	#N/A	0	None	59.1338	23.0628	33.7732	38.4769	#N/A	#N/A	17	#N/A	9.1	914090000	#N/A	68.65	7.7	0		0	0	0	0	0	0	0	cytoplasm:endoplasmic reticulum:mitochondria	0	cytoplasm:endoplasmic reticulum	cytoplasm:endoplasmic reticulum:mitochondria	inviable	1	#N/A	0	01
Control-Blank	None	#N/A	01_05_01	1C1	#N/A	SWAT	below threshold	missing	missing	#N/A	missing	#N/A	#N/A	0	#N/A	#N/A	#N/A	#N/A	#N/A	#N/A	#N/A	#N/A	#N/A	#N/A	#N/A	#N/A	#N/A	#N/A	#N/A	#N/A	#N/A	#N/A	#N/A	0	0	#N/A	0	0	0	0	#N/A	#N/A	#N/A	#N/A	#N/A	#N/A	#N/A	#N/A	01
YEL065W	SIT1	Ferrioxamine B transporter; member of the ARN family of transporters that specifically recognize siderophore-iron chelates; transcription is induced during iron deprivation and diauxic shift; potentially phosphorylated by Cdc28p	01_05_02	2C1	05_H_01	SWAT	vacuole	cell periphery,vacuole	vacuole	vacuole	#N/A	Same	1	0	0	#N/A	14	68	39.0146	17.4648	47.8497	#N/A	#N/A	#N/A	34.79	#N/A	16.4	49546000	#N/A	164.88	6.7	0		0	0	0	0	0	0	0	endosome	endosome	endosome	0	#N/A	#N/A	#N/A	0	01
YBR204C	LDH1	Serine hydrolase; exhibits active esterase plus weak triacylglycerol lipase activities; proposed role in lipid homeostasis, regulating phospholipid and non-polar lipid levels and required for mobilization of LD-stored lipids; localizes to the lipid droplet (LD) surface; contains a classical serine containing catalytic triad (GxSxG motif)	01_05_03	1C2	28_D_1	SWAT	ER	ER	below threshold	cytosol	#N/A	Different	1	0	0	#N/A	0	None	84.0199	24.6317	124.908	0	#N/A	#N/A	18.23	#N/A	14.2	47052000	#N/A	33.6	19.6	Lipid droplet		0	0	0	0	0	0	0	lipid particle	lipid particle	lipid particle	0	#N/A	#N/A	#N/A	0	01
YGL077C	HNM1	Plasma membrane transporter for choline, ethanolamine, and carnitine; involved in the uptake of nitrogen mustard and the uptake of glycine betaine during hypersaline stress; co-regulated with phospholipid biosynthetic genes and negatively regulated by choline and myo-inositol	01_05_04	2C2	05_H_05	SWAT	ER,vacuole	cell periphery,vacuole	ER,vacuole	cell periphery,bud	#N/A	Same	2	0	0	#N/A	12	63	65.1577	44.6048	125.856	#N/A	#N/A	#N/A	120.67	810	44.9	97201000	26	133.13	#N/A	0		0	0	0	0	0	0	0	cell periphery	cell periphery	0	0	#N/A	2.5	#N/A	0	01
YAL042W	ERV46	Protein localized to COPII-coated vesicles; forms a complex with Erv41p; involved in the membrane fusion stage of transport	01_05_05	1C3	03_A_10	SWAT	ER	ER	ER	below threshold	#N/A	New	1	0	0	#N/A	2	21	116.067	65.7274	178.515	#N/A	#N/A	#N/A	15.66	#N/A	68.6	1695400000	#N/A	263.39	14.7	0		0	0	KKxx	0	0	0	0	COPII vesicle:Golgi:endoplasmic reticulum	COPII vesicle:Golgi:endoplasmic reticulum	Golgi:endoplasmic reticulum	0	#N/A	#N/A	#N/A	ENSG00000113719	01
YEL069C	HXT13	Putative transmembrane polyol transporter; supports growth on and uptake of mannitol and sorbitol with moderate affinity when overexpressed in a strain deleted for hexose family members; minor hexose transport activity when overexpressed in a similar strain; induced by non-fermentable carbon sources; induced in low glucose, repressed in high glucose; HXT13 has a paralog, HXT17, that arose from a …	01_05_06	2C3	05_E_06	Blank	Blank	Blank	Blank	below threshold	ER	Blank	1	0	0	#N/A	12	51	89.1745	34.6008	81.2561	31.8824	#N/A	#N/A	19.7	#N/A	0	#N/A	#N/A	#N/A	#N/A	0		0	0	0	0	0	0	0	cell periphery	cell periphery	0	0	#N/A	#N/A	#N/A	ENSG00000160326	01
YBR205W	KTR3	Putative alpha-1,2-mannosyltransferase; involved in O- and N-linked protein glycosylation; member of the KRE2/MNT1 mannosyltransferase family; Svp26p mediates uptake of Ktr3p into COPII vesicles; relocalizes from nucleus to vacuole upon DNA replication stress	01_05_07	1C4	15_A_06	SWAT	punctate,vacuole	vacuole	punctate	vacuole	punctate	Same	2	0	6	0	0	None	98.928	27.1021	181.367	38.7201	#N/A	#N/A	19.9	#N/A	67.3	2094500000	17	177.37	13.8	Bearing Signal Sequence		0	0	0	0	0	0	0	cytoplasm:nucleus:vacuolar membrane:vacuole	0	0	cytoplasm:nucleus:vacuolar membrane:vacuole	#N/A	#N/A	#N/A	0	01
YGL082W	YGL082W	Putative protein of unknown function; predicted prenylation/proteolysis target of Afc1p and Rce1p; green fluorescent protein (GFP)-fusion protein localizes to the cytoplasm and nucleus; not an essential gene; YGL082W has a paralog, YPL191C, that arose from the whole genome duplication	01_05_08	2C4	28_A_1	SWAT	cell periphery	cell periphery	cell periphery	nucleus,cytosol	cell periphery	Different	1	0	0	#N/A	0	None	115.433	30.8273	0	48.8103	#N/A	#N/A	39.21	189	30.4	810600000	40	61.74	8.8	Farnesylation		0	0	0	0	1	0	0	cell periphery:cytoplasm:nucleus	0	cytoplasm:nucleus	cell periphery:cytoplasm:nucleus	#N/A	#N/A	#N/A	ENSG00000128923	01
YNL064C	YDJ1	Type I HSP40 co-chaperone; involved in regulation of HSP90 and HSP70 functions; acts as an adaptor that helps Rsp5p recognize cytosolic misfolded proteins for ubiquitination after heat shock; critical for determining cell size at Start as a function of growth rate; involved in protein translocation across membranes; member of the DnaJ family; chimeric protein in which human p58IPK J domain replac…	01_05_09	1C5	02_C_08	SWAT	cytosol	cytosol	missing	nucleus,cytosol	below threshold	New	1	0	0	#N/A	0	None	201.814	0	274.203	29.5733	#N/A	#N/A	#N/A	2413	737.3	57256000000	34	727.51	10.7	ActiveX VT_ERROR:	ActiveX VT_ERROR:	0	0	ActiveX VT_ERROR:	0	1	0	0	ActiveX VT_ERROR:	ActiveX VT_ERROR:	ActiveX VT_ERROR:	ActiveX VT_ERROR:	#N/A	#N/A	#N/A	ENSG00000086061	01
YER001W	MNN1	Alpha-1,3-mannosyltransferase; integral membrane glycoprotein of the Golgi complex, required for addition of alpha1,3-mannose linkages to N-linked and O-linked oligosaccharides, one of five S. cerevisiae proteins of the MNN1 family	01_05_10	2C5	02_F_02	SWAT	ER,punctate	ER,vacuole	punctate	vacuole	punctate	Different	1	0	0	#N/A	1	12	92.5676	35.6886	133.432	31.8018	#N/A	#N/A	19.48	98.8	22.8	1887700000	215	76.21	8.4	Palmitoylation		0	0	0	1	0	0	0	Golgi	Golgi	Golgi	0	#N/A	#N/A	#N/A	0	01
YBR207W	FTH1	Putative high affinity iron transporter; involved in transport of intravacuolar stores of iron; forms complex with Fet5p; expression is regulated by iron; proposed to play indirect role in endocytosis; protein abundance increases in response to DNA replication stress	01_05_11	1C6	07_G_01	SWAT	ER	ER	below threshold	vacuole membrane	below threshold	Different	1	0	0	#N/A	7	6	36.415	18.7828	11.3517	25.8722	#N/A	#N/A	56.13	173	17.4	50546000	60	67.31	11.4	0		0	0	0	0	0	0	0	vacuolar membrane:vacuole	vacuolar membrane	vacuolar membrane:vacuole	vacuolar membrane	#N/A	3	#N/A	0	01
YGL083W	SCY1	Putative kinase; suppressor of GTPase mutant; similar to bovine rhodopsin kinase; may have a role in intracellular sterol transport	01_05_12	2C6	16_H_04	SWAT	cytosol	cytosol	below threshold	punctate	cytosol	Different	1	0	0	#N/A	0	None	83.5272	21.3367	92.6323	46.2427	#N/A	#N/A	25.22	#N/A	8.3	400090000	36	27.3	6.2	0		0	0	0	0	0	0	0	endosome	0	0	endosome	#N/A	#N/A	#N/A	ENSG00000136021	01
YAL010C	MDM10	Subunit of both the ERMES and the SAM complex; component of ERMES complex which acts as a molecular tether between the mitochondria and the ER, necessary for efficient phospholipid exchange between organelles and for mitophagy; SAM/TOB complex component that functions in the assembly of outer membrane beta-barrel proteins; involved in mitochondrial inheritance and morphology; ERMES complex is oft…	01_05_13	1C7	29_B_4	SWAT	mitochondria	mitochondria	mitochondria	mitochondria	below threshold	Same	1	0	0	#N/A	0	None	25.5189	20.6236	10.0216	25.5889	7.57491	8.4279	14.72	#N/A	4.9	3435600	43	16.67	6.6	Mitochondria outer membrane		0	0	0	0	0	0	0	ERMES complex:mitochondria	ERMES complex:mitochondria	ERMES complex:mitochondria	mitochondria	#N/A	#N/A	#N/A	0	01
YER005W	YND1	Apyrase with wide substrate specificity; helps prevent inhibition of glycosylation by hydrolyzing nucleoside tri- and diphosphates that inhibit glycotransferases; partially redundant with Gda1p; mediates adenovirus E4orf4-induced toxicity	01_05_14	2C7	14_A_07	SWAT	ER	missing	below threshold	ambiguous,punctate,punctate	#N/A	Different	1	0	0	#N/A	1	501	55.0238	18.2346	#N/A	#N/A	#N/A	#N/A	#N/A	#N/A	4.9	69187000	35	44.21	9.2	0		0	0	0	0	0	0	0	COPI vesicle:Golgi	Golgi	Golgi	COPI vesicle:Golgi	inviable	1	#N/A	ENSG00000168032	01
YBR210W	ERV15	Protein involved in export of proteins from the endoplasmic reticulum; ERV15 has a paralog, ERV14, that arose from the whole genome duplication	01_05_15	1C8	15_D_04	SWAT	ER	ER,vacuole	below threshold	cytosol	below threshold	Different	1	0	6	0	2	55	43.2004	15.0013	65.4404	24.5632	#N/A	#N/A	18.64	#N/A	46.6	5292500	#N/A	66.54	20.8	Bearing Signal Sequence		0	0	0	0	0	0	0	COPII vesicle	COPII vesicle	0	0	#N/A	#N/A	#N/A	ENSG00000143771	01
YGL084C	GUP1	Plasma membrane protein involved in remodeling GPI anchors; member of the MBOAT family of putative membrane-bound O-acyltransferases; role in misfolded protein quality control; proposed to be involved in glycerol transport; homolog of the mammalian Hedgehog pathway modulator HHATL; GUP1 has a paralog, GUP2, that arose from the whole genome duplication	01_05_16	2C8	15_B_05	SWAT	ER	ER,vacuole	ER	ER	ER	Same	1	0	6	0	11	44	93.3502	32.5051	151.826	36.4228	#N/A	#N/A	30.42	#N/A	18.3	17106000	#N/A	80.5	9.9	Bearing Signal Sequence		0	0	0	0	0	0	0	cell periphery:endoplasmic reticulum	cell periphery:endoplasmic reticulum	0	0	#N/A	#N/A	#N/A	ENSG00000010282	01
YAL064W-B	YAL064W-B	Fungal-specific protein of unknown function	01_05_17	1C9	09_E_11	SWAT	ER	below threshold	below threshold	below threshold	below threshold	New	1	0	0	#N/A	3	35	27.4747	17.2015	9.22886	25.191	#N/A	#N/A	17.98	#N/A	0	#N/A	#N/A	#N/A	6.8	0		0	0	0	0	0	0	0	integral component of membrane:membrane	0	0	0	#N/A	#N/A	225	0	01
YER006W	NUG1	GTPase that associates with nuclear 60S pre-ribosomes; required for export of 60S ribosomal subunits from the nucleus	01_05_18	2C9	16_G_03	SWAT	nucleus	nucleus	punctate,nucleus	nucleolus,nucleus	nucleus	Same	1	0	0	#N/A	0	None	58.2203	25.5018	64.3908	35.822	#N/A	#N/A	119.25	322.5	164.8	12654000000	738	186.26	8.2	0		0	0	0	0	0	1	0	nucleolus:nucleus	nucleolus:nucleus	nucleus	0	inviable	#N/A	#N/A	ENSG00000130119	01
YBR214W	SDS24	Protein involved in cell separation during budding; one of two S. cerevisiae homologs (Sds23p and Sds24p) of the S. pombe Sds23 protein, which is implicated in APC/cyclosome regulation; may play an indirect role in fluid-phase endocytosis; protein abundance increases in response to DNA replication stress; SDS24 has a paralog, SDS23, that arose from the whole genome duplication	01_05_19	1C10	15_C_11	SWAT	cytosol	cytosol	below threshold	cytosol	cytosol	Same	1	0	0	#N/A	0	None	119.55	19.2808	162.977	57.7302	#N/A	#N/A	40.98	235	6.8	833840000	54	28.58	7.4	0		0	0	0	0	0	0	0	cytoplasm	0	cytoplasm	cytoplasm	#N/A	#N/A	#N/A	0	01
YGL095C	VPS45	Protein of the Sec1p/Munc-18 family; essential for vacuolar protein sorting; required for the function of Pep12p and the early endosome/late Golgi SNARE Tlg2p; essential for fusion of Golgi-derived vesicles with the prevacuolar compartment	01_05_20	2C10	12_D_06	SWAT	cytosol,punctate	cytosol	punctate	punctate,punctate	cytosol	Same	1	0	0	#N/A	0	None	100.779	36.6629	151.002	38.192	#N/A	#N/A	#N/A	#N/A	15.5	912480000	68	43.76	14.2	0		0	0	0	0	0	0	0	Golgi:cytoplasm:vacuolar membrane:vacuole	Golgi:cytoplasm	cytoplasm:vacuolar membrane:vacuole	0	#N/A	#N/A	#N/A	ENSG00000136631	01
YAL065C	YAL065C	Putative protein of unknown function; shows sequence similarity to FLO1 and other flocculins	01_05_21	1C11	13_G_08	SWAT	cytosol	below threshold	below threshold	below threshold	below threshold	0	0	0	0	#N/A	0	None	25.8281	15.5681	8.36543	24.2265	#N/A	#N/A	15.78	#N/A	0	#N/A	#N/A	#N/A	#N/A	0		0	0	0	0	0	0	0	cellular_component:integral component of membrane:membrane	0	0	0	#N/A	#N/A	208	0	01
YER008C	SEC3	Subunit of the exocyst complex; the exocyst mediates polarized targeting and tethering of post-Golgi secretory vesicles to sites of exocytosis prior to SNARE-mediated fusion; PtdIns[4,5]P2-binding protein that localizes to exocytic sites in a Rho1p-dependent, actin-independent manner, targeting and anchoring the exocyst to the plasma membrane with Exo70p; direct GTP Rho1p effector; required for E…	01_05_22	2C11	11_G_08	SWAT	cytosol,bud	bud neck	bud neck	neck,cell periphery,bud,bud neck	cytosol	Same	1	0	0	#N/A	1	830	52.319	21.9895	54.2674	36.0902	#N/A	#N/A	NA	#N/A	12.3	596910000	29	48.55	6.7	0		0	0	0	0	0	0	0	bud neck/tip:cytoplasm:exocyst	bud neck/tip:exocyst	0	bud neck/tip:cytoplasm	inviable	#N/A	#N/A	0	01
YBR217W	ATG12	Ubiquitin-like modifier involved in autophagy and the Cvt pathway; conserved; conjugated to Atg5p to form a complex involved in Atg8p lipidation; Atg5p-Atg12p conjugate enhances E2 activity of Atg3p by rearranging its catalytic site, also forms a complex with Atg16p; the Atg5-Atg12/Atg16 complex binds to membranes and is essential for autophagosome formation	01_05_23	1C12	10_B_03	SWAT	cytosol	cytosol	below threshold	below threshold	below threshold	New	1	0	0	#N/A	0	None	60.3143	18.7498	47.7837	32.5364	#N/A	#N/A	15.78	#N/A	9.8	#N/A	#N/A	24.08	8.2	0		0	0	0	0	0	0	0	autophagosome:cytoplasm	autophagosome	autophagosome:cytoplasm	0	#N/A	#N/A	#N/A	0	01
YGL098W	USE1	Essential SNARE protein localized to the ER; involved in retrograde traffic from the Golgi to the ER and Sey1p-independent homotypic ER fusion; required for efficient nuclear fusion during mating; forms a complex with the SNAREs Sec22p, Sec20p and Ufe1p	01_05_24	2C12	03_E_04	SWAT	ER	ER	below threshold	punctate	ER,punctate	Different	1	0	0	#N/A	1	218	55.1547	21.4591	60.3831	31.1367	#N/A	#N/A	#N/A	#N/A	26.8	155800000	34	40.78	9	Tail Anchored		1	0	0	0	0	0	0	endoplasmic reticulum	endoplasmic reticulum	endoplasmic reticulum	0	inviable	#N/A	#N/A	0	01
YAL067C	SEO1	Putative permease; member of the allantoate transporter subfamily of the major facilitator superfamily; mutation confers resistance to ethionine sulfoxide	01_05_25	1C13	05_A_09	SWAT	cell periphery	cell periphery,vacuole	below threshold	below threshold	below threshold	New	1	0	0	#N/A	12	131	69.8061	15.8982	122.761	31.0676	#N/A	#N/A	15.88	#N/A	0.5	#N/A	#N/A	2.24	189.4	0		0	0	0	0	0	0	0	integral component of membrane:membrane	0	0	0	#N/A	#N/A	#N/A	0	01
YER014W	HEM14	Protoporphyrinogen oxidase; a mitochondrial enzyme that catalyzes the seventh step in the heme biosynthetic pathway, converting protoporphyrinogen IX to protoporphyrin IX; inhibited by diphenyl ether-type herbicides	01_05_26	2C13	02_H_03	SWAT	mitochondria	cytosol,mitochondria	mitochondria	mitochondria	below threshold	Same	1	0	0	#N/A	1	12	72.8822	20.248	107.828	23.645	#N/A	#N/A	15.98	#N/A	16.5	3101900000	151	41.36	15.6	Palmitoylation		0	0	0	1	0	0	0	mitochondria	mitochondria	mitochondria	mitochondria	#N/A	#N/A	#N/A	ENSG00000143224	01
YBR219C	YBR219C	Putative protein of unknown function; YBR219C is not an essential gene	01_05_27	1C14	11_B_10	SWAT	below threshold	below threshold	punctate	below threshold	#N/A	0	0	0	0	#N/A	2	64	20.4882	31.9535	5.51732	25.3201	#N/A	#N/A	15.32	#N/A	#N/A	#N/A	#N/A	#N/A	#N/A	0		0	0	0	0	0	0	0	integral component of membrane:membrane	0	0	0	#N/A	#N/A	#N/A	0	01
YGL099W	LSG1	Putative GTPase involved in 60S ribosomal subunit biogenesis; required for the release of Nmd3p from 60S subunits in the cytoplasm	01_05_28	2C14	15_D_07	SWAT	cytosol	cytosol	cytosol	cytosol	cytosol	Same	1	0	0	#N/A	0	None	176.015	42.8747	232.114	54.815	#N/A	#N/A	16.3	294.5	77.3	6277800000	44	121.11	10	0		0	0	0	0	0	1	0	cytoplasm	cytoplasm	cytoplasm	0	inviable	#N/A	#N/A	ENSG00000204590	01
YAR027W	UIP3	Putative integral membrane protein of unknown function; interacts with Ulp1p at the nuclear periphery; member of DUP240 gene family	01_05_29	1C15	08_D_09	SWAT	punctate,vacuole membrane	ER,vacuole	below threshold	ambiguous	punctate	New	2	0	0	#N/A	2	51	118.1	17.1342	235.893	39.2889	#N/A	#N/A	19.61	#N/A	39.3	187810000	#N/A	66.39	17.2	0		0	0	0	0	0	0	0	cell periphery:nuclear membrane:nucleus	nuclear membrane	cell periphery:nuclear membrane:nucleus	0	#N/A	#N/A	42	0	01
YER015W	FAA2	Medium chain fatty acyl-CoA synthetase; activates imported fatty acids; accepts a wide range of fatty acid chain lengths with a preference for medium chains, C9:0-C13:0; localized to the peroxisome; comparative analysis suggests that a mitochondrially targeted form may result from translation starting at a non-canonical codon upstream of the annotated start codon	01_05_30	2C15	02_H_10	SWAT	punctate	punctate	punctate	below threshold	punctate	New	1	0	0	#N/A	0	None	92.5887	19.6154	148.875	25.1883	#N/A	#N/A	17.52	#N/A	0.4	#N/A	26	7.14	14.1	Peroxisome	0	0	0	0	0	0	0	1	cytoplasm:mitochondria:peroxisome	peroxisome	cytoplasm:mitochondria	mitochondria	#N/A	#N/A	#N/A	ENSG00000130377	01
YBR220C	YBR220C	Putative protein of unknown function; YBR220C is not an essential gene	01_05_31	1C16	06_A_06	SWAT	punctate	vacuole	punctate	below threshold	punctate	New	1	0	0	#N/A	10	20	53.2484	23.8896	66.1874	31.609	#N/A	#N/A	18.62	#N/A	12.6	#N/A	#N/A	58.27	9	0		0	0	0	0	0	0	0	integral component of membrane:membrane	0	0	0	#N/A	#N/A	#N/A	ENSG00000169359	01
YGL104C	VPS73	Mitochondrial protein; mutation affects vacuolar protein sorting; putative transporter; member of the sugar porter family; VPS73 has a paralog, YBR241C, that arose from the whole genome duplication	01_05_32	2C16	11_B_01	SWAT	punctate,vacuole membrane	punctate,vacuole membrane	below threshold	below threshold	punctate	New	2	0	0	#N/A	12	27	133.457	15.7023	152.751	31.5159	#N/A	#N/A	14.02	#N/A	3.3	#N/A	#N/A	17.11	15.7	0		0	0	0	0	0	0	0	mitochondria	0	mitochondria	mitochondria	#N/A	#N/A	#N/A	ENSG00000133460	01
YAR028W	YAR028W	Putative integral membrane protein; member of DUP240 gene family; GFP-fusion protein is induced in response to the DNA-damaging agent MMS	01_05_33	1C17	08_C_09	SWAT	punctate,vacuole membrane	vacuole membrane	below threshold	ambiguous	punctate	New	2	0	0	#N/A	2	51	82.1405	17.1179	171.917	36.2938	#N/A	#N/A	21.29	#N/A	26	125970000	62	37.65	34	0		0	0	0	0	0	0	0	vacuolar membrane	0	0	vacuolar membrane	#N/A	#N/A	37	0	01
YOR180C	DCI1	Peroxisomal protein; identification as a delta(3,5)-delta(2,4)-dienoyl-CoA isomerase involved in fatty acid metabolism is disputed; DCI1 has a paralog, ECI1, that arose from the whole genome duplication	01_05_34	2C17	03_A_07	SWAT	punctate	punctate	punctate	missing	below threshold	New	1	0	0	#N/A	0	None	100.474	20.8315	107.998	23.2637	#N/A	#N/A	#N/A	#N/A	0.6	#N/A	#N/A	15.62	8.9	ActiveX VT_ERROR:	ActiveX VT_ERROR:	0	0	ActiveX VT_ERROR:	0	0	0	1	ActiveX VT_ERROR:	ActiveX VT_ERROR:	ActiveX VT_ERROR:	ActiveX VT_ERROR:	#N/A	#N/A	#N/A	ENSG00000148090	01
Control-his3d-SWAT	None	#N/A	01_05_35	1C18	#N/A	SWAT	cytosol	cytosol	below threshold	#N/A	missing	#N/A	#N/A	0	#N/A	#N/A	#N/A	#N/A	266.08	21.2698	175.649	33.4976	#N/A	#N/A	#N/A	#N/A	#N/A	#N/A	#N/A	#N/A	#N/A	#N/A	#N/A	0	0	#N/A	0	0	0	0	#N/A	#N/A	#N/A	#N/A	#N/A	#N/A	#N/A	#N/A	01
Control-his3d-SWAT	None	#N/A	01_05_36	2C18	#N/A	SWAT	cytosol	cytosol	below threshold	#N/A	missing	#N/A	#N/A	0	#N/A	#N/A	#N/A	#N/A	215.331	15.3791	225.789	33.5092	#N/A	#N/A	#N/A	#N/A	#N/A	#N/A	#N/A	#N/A	#N/A	#N/A	#N/A	0	0	#N/A	0	0	0	0	#N/A	#N/A	#N/A	#N/A	#N/A	#N/A	#N/A	#N/A	01
YAR031W	PRM9	Pheromone-regulated protein; contains 3 predicted transmembrane segments and an FF sequence, a motif involved in COPII binding; member of DUP240 gene family; PRM9 has a paralog, PRM8, that arose from a segmental duplication	01_05_37	1C19	28_F_7	SWAT	ER,punctate	ER,punctate	below threshold	below threshold	below threshold	New	2	0	0	#N/A	2	112	44.032	12.7302	51.9214	25.4748	#N/A	#N/A	14.22	#N/A	7.9	204600000	104	#N/A	21.7	0		0	0	0	0	0	0	0	cell periphery:endoplasmic reticulum	cell periphery:endoplasmic reticulum	cell periphery	0	#N/A	#N/A	16	0	01
YER019W	ISC1	Inositol phosphosphingolipid phospholipase C; mitochondrial membrane localized; hydrolyzes complex sphingolipids to produce ceramide; activates genes required for non-fermentable carbon source metabolism during diauxic shift; activated by phosphatidylserine, cardiolipin, and phosphatidylglycerol; mediates Na+ and Li+ halotolerance; ortholog of mammalian neutral sphingomyelinase type 2	01_05_38	2C19	08_F_04	SWAT	cell periphery,ER	cell periphery,ER	below threshold	missing	ER	New	2	0	0	#N/A	2	397	64.3726	16.8098	114.622	37.8531	#N/A	#N/A	#N/A	#N/A	11.7	36625000	58	53.03	11.2	0		0	0	0	0	0	0	0	endoplasmic reticulum:mitochondria	endoplasmic reticulum:mitochondria	0	0	#N/A	#N/A	#N/A	ENSG00000135587	01
Control-his3d-GFPdC	None	#N/A	01_05_39	1C20	#N/A	SWAT	below threshold	below threshold	below threshold	#N/A	missing	#N/A	#N/A	0	#N/A	#N/A	#N/A	#N/A	13.0191	14.0973	5.79056	#N/A	#N/A	#N/A	#N/A	#N/A	#N/A	#N/A	#N/A	#N/A	#N/A	#N/A	#N/A	0	0	#N/A	0	0	0	0	#N/A	#N/A	#N/A	#N/A	#N/A	#N/A	#N/A	#N/A	01
Control-his3d-GFPdC	None	#N/A	01_05_40	2C20	#N/A	SWAT	below threshold	below threshold	below threshold	#N/A	missing	#N/A	#N/A	0	#N/A	#N/A	#N/A	#N/A	13.5558	15.0112	6.07713	#N/A	#N/A	#N/A	#N/A	#N/A	#N/A	#N/A	#N/A	#N/A	#N/A	#N/A	#N/A	0	0	#N/A	0	0	0	0	#N/A	#N/A	#N/A	#N/A	#N/A	#N/A	#N/A	#N/A	01
YAR033W	MST28	Putative integral membrane protein, involved in vesicle formation; forms complex with Mst27p; member of DUP240 gene family; binds COPI and COPII vesicles; MST28 has a paralog, MST27, that arose from a segmental duplication	01_05_41	1C21	13_F_09	SWAT	ER	ER	below threshold	below threshold	ER,punctate	New	1	0	0	#N/A	2	45	79.9209	17.6342	131.838	36.2688	#N/A	#N/A	13.89	#N/A	3.9	#N/A	#N/A	#N/A	18.8	0		0	0	KKxx	0	0	0	0	COPI vesicle:COPII vesicle:Golgi:cell periphery:endoplasmic reticulum	Golgi:cell periphery:endoplasmic reticulum	COPI vesicle:COPII vesicle:Golgi:endoplasmic reticulum	0	#N/A	#N/A	21	0	01
YER020W	GPA2	Nucleotide binding alpha subunit of the heterotrimeric G protein; interacts with the receptor Gpr1p, has signaling role in response to nutrients; required for the recruitment of Ras-GTP at the plasma membrane and in the nucleus	01_05_42	2C21	02_A_04	SWAT	cytosol	cytosol	cytosol	cell periphery	cytosol	Different	1	0	0	#N/A	0	None	0	29.1725	94.1805	36.6162	#N/A	#N/A	31.84	168	7.2	790580000	16	46.15	8.7	Palmitoylation		0	0	0	1	0	1	0	cell periphery:mitochondria	cell periphery	cell periphery	cell periphery:mitochondria	#N/A	#N/A	#N/A	ENSG00000128266	01
YBR222C	PCS60	Oxalyl-CoA synthetase; capable of catalyzing conversion of oxalate to oxalyl-CoA; catalyzes first step in pathway of oxalate degradation that functions to protect yeast from inhibitory effects of oxalate; peroxisomal protein that binds mRNA; localizes to both peroxisomal peripheral membrane and matrix, expression is highly inducible by oleic acid; similar to E. coli long chain acyl-CoA synthetase	01_05_43	1C22	28_E_2	SWAT	punctate	punctate	punctate	cytosol	punctate	Different	1	0	0	#N/A	0	None	165.806	31.2893	179.991	25.7932	#N/A	#N/A	#N/A	334	50.6	4797700000	27	92.36	9.7	Peroxisome	predicted PTS1 (by Peroxisome DB)	0	0	0	0	0	0	1	cytoplasm:peroxisome	peroxisome	peroxisome	cytoplasm	#N/A	#N/A	#N/A	ENSG00000176715	01
YGL108C	YGL108C	Protein of unknown function, predicted to be palmitoylated; SWAT-GFP, seamless-GFP and mCherry C-terminal fusion proteins localize to the cytosol, while N-terminal GFP fusion protein localizes to the cell periphery; protein abundance increases in response to DNA replication stress	01_05_44	2C22	28_H_1	SWAT	cytosol	cytosol	cytosol	cell periphery	cytosol	Different	1	0	0	#N/A	0	None	70.6192	30.5349	108.059	33.0952	#N/A	#N/A	33.64	100.6	52.8	336190000	300	46.4	9.1	Palmitoylation		0	0	0	1	0	0	0	cell periphery	0	cell periphery	0	#N/A	#N/A	#N/A	0	01
YAR042W	SWH1	Protein similar to mammalian oxysterol-binding protein; contains ankyrin repeats and FFAT motif; interacts with ER anchor Scs2p at the nucleus-vacuole junction; regulated by sterol binding; SWH1 has a paralog, OSH2, that arose from the whole genome duplication	01_05_45	1C23	13_B_12	SWAT	punctate	punctate	below threshold	below threshold	punctate	New	1	0	0	#N/A	0	None	61.819	21.8637	52.9386	44.6916	#N/A	#N/A	17.57	#N/A	7.9	3181600000	#N/A	62.26	7.5	0		0	0	0	0	0	0	0	Golgi:cytoplasm:endoplasmic reticulum:endosome:nuclear membrane:nucleus	Golgi:endoplasmic reticulum:endosome:nuclear membrane	Golgi:cytoplasm:nuclear membrane:nucleus	0	#N/A	#N/A	#N/A	ENSG00000130703	01
YER025W	GCD11	Gamma subunit of the translation initiation factor eIF2; involved in the identification of the start codon; binds GTP when forming the ternary complex with GTP and tRNAi-Met; mutations in human ortholog cause X-linked intellectual disability (XLID)	01_05_46	2C23	16_A_06	SWAT	cytosol	cytosol	missing	cytosol	cytosol	Same	1	0	0	#N/A	0	None	224.305	0	209.645	58.6157	#N/A	#N/A	#N/A	#N/A	220.4	18248000000	#N/A	367.1	#N/A	0		0	0	0	0	0	1	0	eukaryotic 43S preinitiation complex:eukaryotic 48S preinitiation complex:eukaryotic translation initiation factor 2 complex:multi-eIF complex	0	0	0	inviable	#N/A	#N/A	ENSG00000180574	01
YBR235W	VHC1	Vacuolar membrane cation-chloride cotransporter (CCC); likely mediates K+ and Cl- cotransport into the vacuole; has a role in potassium homeostasis and salt tolerance; localizes to sites of contact between the vacuole and mitochondria (vCLAMPs); similar to mammalian electroneutral Na(+)-(K+)-C1- cotransporter family	01_05_47	1C24	06_E_06	SWAT	vacuole membrane	vacuole membrane	ambiguous	ambiguous	punctate	New	1	0	0	#N/A	12	86	65.0961	21.3135	76.014	31.6389	#N/A	#N/A	18.03	#N/A	3	27177000	31	37.44	10.2	0		0	0	0	0	0	0	0	cell periphery:vacuolar membrane	cell periphery	0	vacuolar membrane	#N/A	#N/A	#N/A	ENSG00000140199	01
YGL114W	YGL114W	Putative protein of unknown function; predicted member of the oligopeptide transporter (OPT) family of membrane transporters	01_05_48	2C24	05_C_07	SWAT	ER	vacuole membrane	below threshold	below threshold	vacuole membrane	New	1	0	0	#N/A	12	24	56.8317	17.9331	63.3383	36.1559	#N/A	#N/A	17.29	#N/A	5.6	#N/A	17	37.81	10.1	0		0	0	0	0	0	0	0	vacuolar membrane	0	0	vacuolar membrane	#N/A	#N/A	#N/A	0	01
YJL183W	MNN11	Subunit of a Golgi mannosyltransferase complex; this complex also contains Anp1p, Mnn9p, Mnn10p, and Hoc1p, and mediates elongation of the polysaccharide mannan backbone; has homology to Mnn10p	01_06_01	3C1	02_G_02	SWAT	ER,punctate	ER,vacuole	punctate	punctate	punctate	Same	2	0	0	#N/A	1	33	65.2153	31.1137	104.217	31.1876	#N/A	#N/A	27.99	116.5	40.9	3300000000	8	157.79	15.7	Palmitoylation		0	0	KxKxx	1	0	0	0	Golgi	0	Golgi	0	#N/A	#N/A	#N/A	0	01
YMR306W	FKS3	Protein involved in spore wall assembly; has similarity to 1,3-beta-D-glucan synthase catalytic subunits Fks1p and Gsc2p; the authentic, non-tagged protein is detected in highly purified mitochondria in high-throughput studies	01_06_02	4C1	14_B_09	SWAT	ER	vacuole	below threshold	below threshold	#N/A	New	1	0	0	#N/A	18	338	38.481	18.546	18.7103	0	#N/A	#N/A	16.46	#N/A	0.1	#N/A	#N/A	3.12	7.8	0		0	0	0	0	0	0	0	mitochondria	0	mitochondria	mitochondria	#N/A	4	#N/A	0	01
YKL197C	PEX1	AAA-peroxin; heterodimerizes with AAA-peroxin Pex6p and participates in the recycling of peroxisomal signal receptor Pex5p from the peroxisomal membrane to the cystosol; induced by oleic acid and upregulated during anaerobiosis; mutations in human PEX1 can lead to severe peroxisomal disorders and early death	01_06_03	3C2	02_H_12	SWAT	cytosol	cytosol	punctate	punctate	cytosol	Different	1	0	0	#N/A	0	None	71.9263	24.4151	66.574	44.8997	#N/A	#N/A	26.76	#N/A	3.7	181420000	57	31.8	8.3	Peroxisome	0	0	0	0	0	0	0	0	cytoplasm:peroxisome	peroxisome	cytoplasm:peroxisome	peroxisome	#N/A	#N/A	#N/A	ENSG00000127980	01
YNR021W	YNR021W	Putative protein of unknown function; green fluorescent protein (GFP)-fusion protein localizes to the endoplasmic reticulum; YNR021W is not an essential gene	01_06_04	4C2	01_A_01	SWAT	ER	ER	ER	ER	#N/A	Same	1	0	6	0	1	42	130.528	64.645	80.4786	#N/A	#N/A	#N/A	14.63	707.5	132.5	7765100000	24	256.67	34.4	Bearing Signal Sequence		0	0	0	0	0	0	0	endoplasmic reticulum	0	endoplasmic reticulum	endoplasmic reticulum	#N/A	#N/A	#N/A	0	01
YJL185C	ATG36	Pex3p interacting protein, required for pexophagy; interacts with Atg8p and Atg11p; mRNA is weakly cell cycle regulated, peaking in G2 phase; YJL185C is a non-essential gene	01_06_05	3C3	02_E_09	SWAT	punctate	punctate	punctate	below threshold	below threshold	New	1	0	0	#N/A	0	None	28.8123	18.6979	9.75361	24.8293	#N/A	#N/A	16.09	#N/A	3.3	#N/A	#N/A	12.93	17	Peroxisome	0	0	0	0	0	0	0	0	peroxisome	peroxisome	peroxisome	0	#N/A	3	#N/A	0	01
YMR319C	FET4	Low-affinity Fe(II) transporter of the plasma membrane	01_06_06	4C3	07_C_04	SWAT	cell periphery,vacuole	cell periphery,vacuole	below threshold	cell periphery,vacuole	cell periphery	Same	2	0	0	#N/A	7	98	66.9462	23.5696	83.1895	29.7232	#N/A	#N/A	14.55	#N/A	22.5	15686000	116	63.93	14.8	0		0	0	0	0	0	0	0	cell periphery	cell periphery	0	0	#N/A	#N/A	#N/A	0	01
YMR134W	ERG29	Protein of unknown function involved in ergosterol biosynthesis; conditional mutants produce less ergosterol, display impaired oxygen consumption, respiratory growth, mitochondrial iron utilization, and are more sensitive to oxidative stress; mutant bm-8 has a growth defect on iron-limited medium that is complemented by overexpression of Yfh1p; protein localizes to the cytoplasm, ER and nuclear e…	01_06_07	3C4	14_D_05	SWAT	ER	ER,punctate	cell periphery,punctate	ER	punctate,bud neck	New	1	0	0	#N/A	1	36	98.6527	40.6686	105.297	43.4987	#N/A	#N/A	43.48	102.5	30.6	362650000	141	38.42	40.6	ActiveX VT_ERROR:	ActiveX VT_ERROR:	0	0	ActiveX VT_ERROR:	0	0	0	0	ActiveX VT_ERROR:	ActiveX VT_ERROR:	ActiveX VT_ERROR:	ActiveX VT_ERROR:	inviable	#N/A	#N/A	0	01
YNR026C	SEC12	Guanine nucleotide exchange factor (GEF); activates Sar1p by catalyzing the exchange of GDP for GTP; required for the initiation of COPII vesicle formation in ER to Golgi transport; glycosylated integral membrane protein of the ER; SEC12 has a paralog, SED4, that arose from the whole genome duplication	01_06_08	4C4	09_B_07	SWAT	ER	ER	ER	ER	ER	Same	1	0	0	#N/A	1	355	88.4956	36.7689	106.211	34.3034	#N/A	#N/A	13.33	#N/A	27.7	598580000	61	50.89	11.2	0		0	0	0	0	0	0	0	Golgi:endoplasmic reticulum	Golgi:endoplasmic reticulum	Golgi:endoplasmic reticulum	0	inviable	#N/A	#N/A	0	01
YJL193W	YJL193W	Putative protein of unknown function; predicted to encode a triose phosphate transporter subfamily member based on phylogenetic analysis; similar to YOR307C/SLY41; deletion mutant has a respiratory growth defect	01_06_09	3C5	06_D_12	SWAT	punctate	vacuole	punctate	below threshold	below threshold	New	1	0	0	#N/A	10	12	34.5551	23.6358	32.8406	26.7323	#N/A	#N/A	16.2	#N/A	9.5	#N/A	#N/A	32.93	5.5	0		0	0	0	0	0	0	0	integral component of membrane:membrane	0	0	0	#N/A	#N/A	#N/A	0	01
YNL006W	LST8	Protein required for the transport of Gap1p; required for the transport of amino acid permease Gap1p from the Golgi to the cell surface; component of the TOR signaling pathway; associates with both Tor1p and Tor2p; contains a WD-repeat	01_06_10	4C5	09_E_01	SWAT	cytosol,punctate	cytosol,punctate	cytosol,punctate	punctate	below threshold	Same	2	0	0	#N/A	0	None	51.5097	33.5028	15.7516	24.5443	#N/A	#N/A	#N/A	64.5	18.6	#N/A	37	68.87	10.2	0		0	0	0	0	0	0	0	Golgi:cell periphery:endosome:vacuolar membrane:vacuole	Golgi:cell periphery:endosome	cell periphery:vacuolar membrane:vacuole	0	inviable	#N/A	#N/A	ENSG00000167965	01
YDR517W	GRH1	Acetylated cis-Golgi protein, involved in ER to Golgi transport; homolog of human GRASP65; forms a complex with the coiled-coil protein Bug1p; mutants are compromised for the fusion of ER-derived vesicles with Golgi membranes; protein abundance increases in response to DNA replication stress	01_06_11	3C6	14_H_05	SWAT	cytosol	cytosol	cytosol	punctate	cytosol	New	1	0	0	#N/A	0	None	92.1896	42.6281	159.744	49.8421	#N/A	#N/A	#N/A	245	39.3	508980000	61	109.15	14.5	ActiveX VT_ERROR:	ActiveX VT_ERROR:	0	0	ActiveX VT_ERROR:	0	0	0	0	ActiveX VT_ERROR:	ActiveX VT_ERROR:	ActiveX VT_ERROR:	ActiveX VT_ERROR:	#N/A	#N/A	#N/A	ENSG00000114745	01
YNR030W	ALG12	Alpha-1,6-mannosyltransferase localized to the ER; responsible for addition of alpha-1,6 mannose to dolichol-linked Man7GlcNAc2; acts in the dolichol pathway for N-glycosylation; human homolog ALG12 complements yeast null mutant	01_06_12	4C6	15_C_05	SWAT	ER	ER	ER	ER	ER	Same	1	0	6	21	10	62	144.225	22.8209	150.872	39.5197	#N/A	#N/A	34.1	119.5	20.5	1599500000	59	84.23	10.7	0		0	0	0	0	0	0	0	endoplasmic reticulum	0	endoplasmic reticulum	endoplasmic reticulum	#N/A	#N/A	#N/A	ENSG00000182858	01
YJL194W	CDC6	Essential ATP-binding protein required for DNA replication; component of the pre-replicative complex (pre-RC) which requires ORC to associate with chromatin and is in turn required for Mcm2-7p DNA association; homologous to S. pombe Cdc18p; relocalizes from nucleus to cytoplasm upon DNA replication stress; degraded in response to plasma membrane stress	01_06_13	3C7	16_C_03	SWAT	nucleus	below threshold	below threshold	nucleus,cytosol	#N/A	Same	1	0	0	#N/A	1	245	16.6599	19.8883	4.23531	23.6425	#N/A	#N/A	18.11	#N/A	9.3	#N/A	#N/A	37.99	8	0		0	0	0	0	0	1	0	cytoplasm:nucleus	0	nucleus	cytoplasm:nucleus	inviable	#N/A	#N/A	ENSG00000085840	01
YNL008C	ASI3	Subunit of the inner nuclear membrane Asi ubiquitin ligase complex; Asi complex targets both misfolded proteins of the inner nuclear membrane-associated degradation (INMAD) pathway and regulators of sterol biosynthesis for ubiquitin-mediated degradation; acts with Asi1p and Asi2p to ensure the fidelity of SPS-sensor signaling by targeting latent unprocessed forms of Stp1p and Stp2p, maintaining t…	01_06_14	4C7	08_D_02	SWAT	nuclear periphery	punctate,nuclear periphery	below threshold	nuclear periphery	below threshold	Same	1	0	0	#N/A	6	88	30.9242	20.3134	13.2181	23.5466	#N/A	#N/A	16.65	#N/A	7.6	#N/A	44	36.47	12.6	0		0	0	0	0	0	0	0	endoplasmic reticulum:nuclear membrane:nucleus	endoplasmic reticulum:nuclear membrane	nuclear membrane:nucleus	0	#N/A	#N/A	#N/A	0	01
YMR029C	FAR8	Protein involved in recovery from arrest in response to pheromone; acts in a cell cycle arrest recovery pathway independent from Far1p; interacts with Far3p, Far7p, Far9p, Far10p, and Far11p	01_06_15	3C8	12_A_10	Blank	Blank	Blank	Blank	ambiguous,ER	below threshold	Blank	1	0	0	#N/A	0	None	45.4475	24.9873	53.0305	25.7459	#N/A	#N/A	28.34	#N/A	15.9	2547800000	29	49.5	13.6	ActiveX VT_ERROR:	ActiveX VT_ERROR:	0	0	ActiveX VT_ERROR:	0	0	0	0	ActiveX VT_ERROR:	ActiveX VT_ERROR:	ActiveX VT_ERROR:	ActiveX VT_ERROR:	#N/A	#N/A	#N/A	0	01
YNR035C	ARC35	Subunit of the ARP2/3 complex; ARP2/3 is required for the motility and integrity of cortical actin patches; required for cortical localization of calmodulin	01_06_16	4C8	10_E_09	SWAT	punctate	punctate,bud neck	missing	punctate	punctate	Same	1	0	0	#N/A	0	None	166.99	#N/A	178.122	45.2363	#N/A	#N/A	#N/A	#N/A	87.5	11505000000	43	202.9	15.5	0		0	0	0	0	0	0	0	actin:cytoplasm:cytoskeleton	cytoplasm	actin:cytoplasm:cytoskeleton	0	inviable	#N/A	#N/A	ENSG00000163466	01
YJL196C	ELO1	Elongase I, medium-chain acyl elongase; catalyzes carboxy-terminal elongation of unsaturated C12-C16 fatty acyl-CoAs to C16-C18 fatty acids; ELO1 has a paralog, ELO2, that arose from the whole genome duplication	01_06_17	3C9	07_F_09	SWAT	ER	ER	ER	ER	below threshold	Same	1	0	0	#N/A	7	65	55.5378	22.9707	34.1004	25.0983	#N/A	#N/A	52.67	745.5	84	86260000	17	212.26	22.1	0		0	0	0	0	0	0	0	integral component of membrane:membrane	0	0	0	#N/A	3	#N/A	ENSG00000170522	01
YNL009W	IDP3	Peroxisomal NADP-dependent isocitrate dehydrogenase; catalyzes oxidation of isocitrate to alpha-ketoglutarate with the formation of NADP(H+), required for growth on unsaturated fatty acids; IDP3 has a paralog, IDP2, that arose from the whole genome duplication	01_06_18	4C9	02_C_11	SWAT	punctate	punctate	punctate	cytosol	punctate	Different	1	0	0	#N/A	0	None	90.1325	21.5617	93.613	29.9434	#N/A	#N/A	20.43	#N/A	3.5	89583000	13	6.91	59.2	Peroxisome	predicted PTS1 (by Peroxisome DB)	0	0	0	0	0	0	1	cytoplasm:mitochondria:peroxisome	cytoplasm:peroxisome	0	cytoplasm:mitochondria	#N/A	#N/A	#N/A	ENSG00000182054	01
YKL209C	STE6	Plasma membrane ATP-binding cassette (ABC) transporter; required for the export of a-factor, catalyzes ATP hydrolysis coupled to a-factor transport; contains 12 transmembrane domains and two ATP binding domains; expressed only in MATa cells; human homolog ABCB1 mediates multidrug resistance in many chemotherapy-resistant tumors by effluxing toxic compounds from the cell	01_06_19	3C10	06_D_04	SWAT	vacuole	vacuole	below threshold	vacuole	below threshold	Same	1	0	0	#N/A	12	26	28.3175	19.1982	38.3696	24.8356	#N/A	#N/A	37.1	168.7	17.4	42240000	186	168.05	#N/A	0		0	0	0	0	0	0	0	Golgi:cell periphery	Golgi:cell periphery	0	0	#N/A	#N/A	#N/A	ENSG00000005471	01
YNR039C	ZRG17	Endoplasmic reticulum zinc transporter; part of a heterodimeric transporter with Msc2p that transfers zinc from the cytosol to the ER lumen; member of the cation diffusion facilitator family of efflux pumps; zinc-regulated directly through Zap1p; transcription induced under conditions of zinc deficiency	01_06_20	4C10	07_H_05	SWAT	ER	ER	ER	ER	below threshold	Same	1	0	0	#N/A	6	226	37.8555	29.0031	12.8759	28.0244	#N/A	#N/A	26.67	#N/A	5.3	6587400	39	29.04	5.9	0		0	0	0	0	0	0	0	endoplasmic reticulum	endoplasmic reticulum	endoplasmic reticulum	endoplasmic reticulum	#N/A	#N/A	#N/A	0	01
YJL198W	PHO90	Low-affinity phosphate transporter; acts upstream of Pho81p in regulation of the PHO pathway; deletion of pho84, pho87, pho89, pho90, and pho91 causes synthetic lethality; transcription independent of Pi and Pho4p activity; overexpression results in vigorous growth; PHO90 has a paralog, PHO87, that arose from the whole genome duplication	01_06_21	3C11	05_D_10	SWAT	cell periphery,punctate	cytosol	punctate,mitochondria	ER	cytosol	Different	1	0	0	#N/A	13	417	107.263	49.3434	249.335	54.0467	#N/A	#N/A	13.94	#N/A	18	456630000	300	61.95	7.4	0		0	0	0	0	0	0	0	cell periphery	cell periphery	0	0	inviable	2.5	#N/A	0	01
YNL015W	PBI2	Cytosolic inhibitor of vacuolar proteinase B (PRB1); required for efficient vacuole inheritance; with thioredoxin forms protein complex LMA1, which assists in priming SNARE molecules and promotes vacuole fusion; protein abundance increases in response to DNA replication stress	01_06_22	4C11	15_H_12	SWAT	cytosol	cytosol	cytosol	nucleus,cytosol	cytosol	Same	1	0	0	#N/A	0	None	392.31	133.94	503.867	76.1097	#N/A	#N/A	97.13	418.7	285	22042000000	106	198.17	120	0		0	0	0	0	0	0	0	cytoplasm:nucleus:vacuole	vacuole	cytoplasm:nucleus	cytoplasm:nucleus	#N/A	#N/A	#N/A	0	01
YKL212W	SAC1	Phosphatidylinositol phosphate (PtdInsP) phosphatase; involved in hydrolysis of PtdIns[4]P in the early and medial Golgi; regulated by interaction with Vps74p; ER localized transmembrane protein which cycles through the Golgi; involved in protein trafficking and processing, secretion, and cell wall maintenance; regulates sphingolipid biosynthesis through the modulation of PtdIns(4)P metabolism	01_06_23	3C12	01_B_08	SWAT	ER	missing	missing	ER,vacuole	ER	Same	1	0	0	#N/A	2	522	216.939	0	#N/A	61.1634	#N/A	#N/A	78.9	624	103.8	11455000000	57	234.14	#N/A	Lipid droplet		0	0	0	0	0	0	0	Golgi:endoplasmic reticulum:mitochondria	Golgi:endoplasmic reticulum	endoplasmic reticulum	mitochondria	#N/A	#N/A	31	ENSG00000198825	01
YNR048W	YNR048W	Potential noncatalytic subunit for phospholipid translocase Dnf3p; YNR048W has a paralog, CDC50, that arose from the whole genome duplication	01_06_24	4C12	04_C_03	SWAT	ER	ER	ER	cytosol	below threshold	Different	1	0	0	#N/A	2	47	55.3175	28.2488	28.8634	24.9535	#N/A	#N/A	24.73	176	4.8	105760000	30	18.53	11.7	0		0	0	0	0	0	0	0	Golgi	Golgi	0	0	#N/A	2	#N/A	ENSG00000112697	01
YJL204C	RCY1	F-box protein involved in recycling endocytosed proteins; involved in recycling plasma membrane proteins internalized by endocytosis; localized to sites of polarized growth; direct interaction with C-terminal cytoplasmic region of Drs2p plays an important role for Drs2p function in endocytic recycling pathway	01_06_25	3C13	01_G_04	SWAT	punctate,bud	punctate,bud	punctate	cytosol	cytosol,punctate	Different	1	0	0	#N/A	0	None	44.9522	26.4444	40.4882	40.3028	#N/A	#N/A	34.33	#N/A	8.7	171270000	#N/A	27.07	8.9	Farnesylation		0	0	0	0	1	0	0	Golgi:bud neck/tip:cytoplasm:endosome	Golgi:bud neck/tip:endosome	bud neck/tip:cytoplasm	0	#N/A	#N/A	#N/A	0	01
YNL020C	ARK1	Serine/threonine protein kinase; involved in regulation of the cortical actin cytoskeleton; involved in control of endocytosis; ARK1 has a paralog, PRK1, that arose from the whole genome duplication	01_06_26	4C13	10_D_03	SWAT	punctate,bud	punctate,bud neck	punctate,bud neck	punctate	punctate	Same	1	0	0	#N/A	0	None	58.7628	28.2716	58.1393	42.4758	#N/A	#N/A	22.26	#N/A	5.1	67636000	37	18.28	6.4	0		0	0	0	0	0	0	0	actin:cytoplasm:cytoskeleton	actin	actin:cytoplasm:cytoskeleton	0	inviable	1	#N/A	ENSG00000115977	01
YKL217W	JEN1	Monocarboxylate/proton symporter of the plasma membrane; transport activity is dependent on the pH gradient across the membrane; mediates high-affinity uptake of carbon sources lactate, pyuvate, and acetate, and also of the micronutrient selenite, whose structure mimics that of monocarboxylates; expression and localization are tightly regulated, with transcription repression, mRNA degradation, an…	01_06_27	3C14	05_G_06	SWAT	cell periphery,vacuole	vacuole	below threshold	below threshold	below threshold	New	2	0	0	#N/A	12	141	32.3602	21.4517	48.8936	24.711	#N/A	#N/A	18.06	#N/A	0.5	#N/A	29	1.68	13.6	0		0	0	0	0	0	0	0	cell periphery:mitochondria	cell periphery	0	mitochondria	#N/A	2.5	#N/A	0	01
YNR049C	MSO1	Lipid-interacting protein in SNARE complex assembly machinery; acts at late step in secretion; interacts with membranes through two distinct binding sites; shows genetic and physical interactions with Sec1p; required for prospore membrane formation during sporulation; N-terminus closely associates with plasma membrane, C-terminus colocalizes with Sec4p on intracellular membranes; relocalizes from…	01_06_28	4C14	11_G_05	SWAT	cytosol,bud neck	cytosol,bud neck	punctate,bud	bud neck	cytosol	Same	2	0	0	#N/A	0	None	77.794	26.072	97.3641	36.3423	#N/A	#N/A	NA	#N/A	30.9	178950000	39	36.09	10.9	0		0	0	0	0	0	0	0	bud neck/tip:cell periphery:cytoplasm:nucleus	bud neck/tip:cell periphery	0	bud neck/tip:cytoplasm:nucleus	#N/A	#N/A	#N/A	0	01
YJL205C	NCE101	Protein of unknown function; involved in secretion of proteins that lack classical secretory signal sequences; SWAT-GFP and mCherry fusion proteins localize to the cytosol	01_06_29	3C15	14_A_02	SWAT	cytosol,nucleus	cytosol	below threshold	missing	below threshold	New	1	0	0	#N/A	1	12	21.4594	21.2999	16.2594	23.8388	#N/A	#N/A	#N/A	#N/A	64.7	#N/A	#N/A	76.14	13.2	0		0	0	0	0	0	0	0	cellular_component:integral component of membrane:membrane	0	0	0	#N/A	#N/A	#N/A	0	01
YMR060C	SAM37	Component of the Sorting and Assembly Machinery (SAM) complex; the SAM (or TOB) complex is located in the mitochondrial outer membrane; binds precursors of beta-barrel proteins and facilitates their outer membrane insertion; contributes to SAM complex stability	01_06_30	4C15	29_C_3	SWAT	mitochondria	mitochondria	mitochondria	mitochondria	below threshold	Same	1	0	0	#N/A	0	None	35.5658	25.2658	14.9135	25.1157	5.10455	7.35906	16.88	#N/A	16.7	40553000	21	38.98	30.3	Mitochondria outer membrane		0	0	0	0	0	0	0	mitochondria	mitochondria	mitochondria	mitochondria	#N/A	#N/A	#N/A	0	01
YKL219W	COS9	Endosomal protein involved in turnover of plasma membrane proteins; member of the DUP380 subfamily of conserved, often subtelomeric COS genes; required for the multivesicular vesicle body sorting pathway that internalizes plasma membrane proteins for degradation; Cos proteins provide ubiquitin in trans for nonubiquitinated cargo proteins	01_06_31	3C16	12_F_02	SWAT	ambiguous,ER	vacuole	below threshold	below threshold	below threshold	New	1	0	0	#N/A	4	73	37.1572	21.1983	18.5028	23.9123	#N/A	#N/A	15	#N/A	7.3	8968000	871	29.26	15	0		0	0	0	0	0	0	0	integral component of membrane:membrane	0	0	0	#N/A	#N/A	#N/A	0	01
YNR051C	BRE5	Ubiquitin protease cofactor; forms deubiquitination complex with Ubp3p that coregulates anterograde and retrograde transport between the endoplasmic reticulum and Golgi compartments; null is sensitive to brefeldin A	01_06_32	4C16	15_F_12	Blank	Blank	Blank	Blank	cytosol	cytosol	Blank	1	0	0	#N/A	0	None	113.035	62.2406	113.983	49.4851	#N/A	#N/A	74.3	449.5	40	4796900000	18	120.5	7.1	0		0	0	0	0	0	0	0	P-body:cytoplasm	P-body	0	cytoplasm	#N/A	#N/A	#N/A	0	01
YJL207C	LAA1	AP-1 accessory protein; colocalizes with clathrin to the late-Golgi apparatus; involved in TGN-endosome transport; physically interacts with AP-1; similar to the mammalian p200; may interact with ribosomes; YJL207C is a non-essential gene	01_06_33	3C17	04_D_07	SWAT	punctate	punctate	punctate	punctate	cytosol,punctate	Same	1	0	0	#N/A	3	145	56.2516	31.3485	36.7023	36.5441	#N/A	#N/A	36.03	121.5	5.3	204570000	25	60.7	#N/A	0		0	0	0	0	0	0	0	Golgi:endosome	0	Golgi	endosome	#N/A	#N/A	#N/A	ENSG00000008869	01
YNL029C	KTR5	Putative mannosyltransferase involved in protein glycosylation; member of the KRE2/MNT1 mannosyltransferase family; KTR5 has a paralog, KTR7, that arose from the whole genome duplication	01_06_34	4C17	09_C_06	SWAT	ER,punctate	ER,vacuole	below threshold	below threshold	below threshold	New	2	0	0	#N/A	1	12	47.8533	17.9756	65.3855	22.8545	#N/A	#N/A	15.41	#N/A	2.8	#N/A	16	26.68	14.8	0		0	0	0	0	0	0	0	Golgi	Golgi	0	0	#N/A	#N/A	#N/A	0	01
Control-his3d-SWAT	None	#N/A	01_06_35	3C18	#N/A	SWAT	cytosol	cytosol	below threshold	#N/A	missing	#N/A	#N/A	0	#N/A	#N/A	#N/A	#N/A	238.594	19.353	178.185	32.6909	#N/A	#N/A	#N/A	#N/A	#N/A	#N/A	#N/A	#N/A	#N/A	#N/A	#N/A	0	0	#N/A	0	0	0	0	#N/A	#N/A	#N/A	#N/A	#N/A	#N/A	#N/A	#N/A	01
Control-his3d-SWAT	None	#N/A	01_06_36	4C18	#N/A	SWAT	cytosol	cytosol	below threshold	#N/A	missing	#N/A	#N/A	0	#N/A	#N/A	#N/A	#N/A	245.566	19.2751	170.329	31.7289	#N/A	#N/A	#N/A	#N/A	#N/A	#N/A	#N/A	#N/A	#N/A	#N/A	#N/A	0	0	#N/A	0	0	0	0	#N/A	#N/A	#N/A	#N/A	#N/A	#N/A	#N/A	#N/A	01
YJL210W	PEX2	RING-finger peroxin and E3 ubiquitin ligase; peroxisomal membrane protein with a C-terminal zinc-binding RING domain, forms translocation subcomplex with Pex10p and Pex12p which functions in peroxisomal matrix protein import	01_06_37	3C19	02_G_08	SWAT	cytosol,punctate	cytosol,punctate	below threshold	punctate	below threshold	Same	1	0	0	#N/A	0	None	59.1373	19.5683	20.6583	25.8706	#N/A	#N/A	14.09	#N/A	4.8	#N/A	#N/A	52.12	14.4	Peroxisome	Pex19 signal (by Peroxisomes DB)	0	0	0	0	0	0	0	peroxisome	peroxisome	peroxisome	0	#N/A	2.5	#N/A	0	01
YNL032W	SIW14	Tyrosine phosphatase involved in actin organization and endocytosis; localized to the cytoplasm	01_06_38	4C19	15_G_09	SWAT	cytosol	cytosol	cytosol	cytosol	cytosol	Same	1	0	0	#N/A	0	None	57.8404	30.8624	60.3611	38.3456	#N/A	#N/A	27.66	65	25.2	487200000	516	44.84	7.6	0		0	0	0	0	0	0	0	cytoplasm	0	cytoplasm	cytoplasm	#N/A	3.5	#N/A	0	01
Control-his3d-GFPdC	None	#N/A	01_06_39	3C20	#N/A	SWAT	below threshold	below threshold	below threshold	#N/A	missing	#N/A	#N/A	0	#N/A	#N/A	#N/A	#N/A	11.2304	20.1273	5.10038	0	#N/A	#N/A	#N/A	#N/A	#N/A	#N/A	#N/A	#N/A	#N/A	#N/A	#N/A	0	0	#N/A	0	0	0	0	#N/A	#N/A	#N/A	#N/A	#N/A	#N/A	#N/A	#N/A	01
Control-his3d-GFPdC	None	#N/A	01_06_40	4C20	#N/A	SWAT	below threshold	below threshold	below threshold	#N/A	missing	#N/A	#N/A	0	#N/A	#N/A	#N/A	#N/A	12.4911	18.7249	4.66986	0	#N/A	#N/A	#N/A	#N/A	#N/A	#N/A	#N/A	#N/A	#N/A	#N/A	#N/A	0	0	#N/A	0	0	0	0	#N/A	#N/A	#N/A	#N/A	#N/A	#N/A	#N/A	#N/A	01
YJL212C	OPT1	Proton-coupled oligopeptide transporter of the plasma membrane; also transports glutathione and phytochelatin; member of the OPT family	01_06_41	3C21	05_D_04	SWAT	cell periphery,punctate	cell periphery,vacuole	cytosol	ER	cell periphery,punctate	Different	2	0	0	#N/A	14	107	53.4085	26.8872	55.5803	31.5793	#N/A	#N/A	#N/A	#N/A	17	54707000	2	92.64	6.6	0		0	0	0	0	0	0	0	cell periphery	cell periphery	cell periphery	0	#N/A	#N/A	#N/A	0	01
YNL038W	GPI15	Protein involved in the synthesis of GlcNAc-PI; GlcNAc-PI is the first intermediate in the synthesis of glycosylphosphatidylinositol (GPI) anchors; homologous to the human PIG-H protein; GlcNAc-PI stands for N-acetylglucosaminyl phosphatidylinositol	01_06_42	4C21	08_C_05	SWAT	ER	vacuole	below threshold	missing	below threshold	New	1	0	0	#N/A	2	59	35.3386	15.2988	35.5251	24.6892	#N/A	#N/A	#N/A	#N/A	19.2	#N/A	#N/A	56.09	43.9	0		0	0	0	0	0	0	0	glycosylphosphatidylinositol-N-acetylglucosaminyltransferase (GPI-GnT) complex:integral component of membrane:membrane	0	0	0	inviable	#N/A	#N/A	0	01
YKL221W	MCH2	Protein with similarity to mammalian monocarboxylate permeases; monocarboxylate permeases are involved in transport of monocarboxylic acids across the plasma membrane but mutant is not deficient in monocarboxylate transport	01_06_43	3C22	06_H_02	SWAT	cell periphery	cell periphery	below threshold	below threshold	cell periphery,punctate	New	1	0	0	#N/A	12	40	62.15	21.5557	86.7454	37.229	#N/A	#N/A	15.12	#N/A	0.3	#N/A	#N/A	0.42	#N/A	0		0	0	0	0	0	0	0	integral component of membrane:membrane	0	0	0	#N/A	#N/A	#N/A	0	01
YNR053C	NOG2	Putative GTPase; associates with pre-60S ribosomal subunits in the nucleolus and is required for their nuclear export and maturation; recruited by ribosomal proteins L17, L35, and L37 to assembling ribosomes after 27SB pre-rRNA is generated, immediately preceding removal of ITS2	01_06_44	4C22	16_F_03	SWAT	nucleus	missing	nucleus	nucleus	nucleus	Same	1	0	#N/A	#N/A	0	None	63.4702	52.2905	#N/A	30.668	#N/A	#N/A	110.51	901	90.2	3993300000	381	156.45	10.1	0		0	0	0	0	0	1	0	nucleolus:nucleus	nucleolus:nucleus	nucleolus:nucleus	0	inviable	#N/A	#N/A	ENSG00000134697	01
YJL214W	HXT8	Protein of unknown function with similarity to hexose transporters; expression is induced by low levels of glucose and repressed by high levels of glucose	01_06_45	3C23	06_F_07	SWAT	cell periphery,vacuole membrane	cell periphery,vacuole	below threshold	below threshold	cell periphery	New	1	0	0	#N/A	12	62	76.1217	18.621	79.282	35.0267	#N/A	#N/A	16.41	#N/A	1.2	#N/A	300	1.56	15.5	0		0	0	0	0	0	0	0	cell periphery	cell periphery	0	0	#N/A	#N/A	18	ENSG00000160326	01
YNL041C	COG6	Component of the conserved oligomeric Golgi complex; a cytosolic tethering complex (Cog1p through Cog8p) that functions in protein trafficking to mediate fusion of transport vesicles to Golgi compartments	01_06_46	4C23	14_C_05	SWAT	cytosol,punctate	cytosol,nucleus	punctate	punctate	cytosol	Same	1	0	0	#N/A	0	None	54.9831	26.668	49.6361	37.4523	#N/A	#N/A	33.42	125	11.6	1171700000	101	51.5	6.2	0		0	0	0	0	0	0	0	Golgi	Golgi	Golgi	0	#N/A	#N/A	#N/A	ENSG00000133103	01
YKR001C	VPS1	Dynamin-like GTPase required for vacuolar sorting; also involved in actin cytoskeleton organization, endocytosis, late Golgi-retention of some proteins, regulation of peroxisome biogenesis	01_06_47	3C24	09_F_12	SWAT	cytosol,punctate	cytosol,punctate	punctate	cytosol,punctate,punctate	cytosol,bud neck	Same	2	0	0	#N/A	0	None	206.045	21.1751	269.532	62.3679	#N/A	#N/A	16.38	#N/A	124.6	35204000000	79	219.44	13.2	0		0	0	0	0	0	1	0	actin:cytoplasm:cytoskeleton:microtubule:mitochondria:peroxisome:vacuolar membrane	actin:peroxisome:vacuolar membrane	cytoplasm:cytoskeleton:microtubule	mitochondria	#N/A	#N/A	#N/A	ENSG00000183486	01
YNR055C	HOL1	Putative transporter in the major facilitator superfamily; member of the 12-spanner drug:H(+) antiporter DHA1 family; mutations in membrane-spanning domains permit cation and histidinol uptake	01_06_48	4C24	06_D_05	SWAT	cell periphery	cell periphery,vacuole	below threshold	cell periphery	below threshold	Same	2	0	0	#N/A	11	64	30.8523	23.6189	179.194	24.0516	#N/A	#N/A	25.6	#N/A	13.3	#N/A	#N/A	60.55	11.8	0		0	0	0	0	0	0	0	cell periphery:mitochondria	cell periphery	0	mitochondria	#N/A	4	#N/A	0	01
YDL095W	PMT1	Protein O-mannosyltransferase of the ER membrane; transfers mannose from dolichyl phosphate-D-mannose to protein serine and threonine residues; 1 of 7 related proteins involved in O-glycosylation which is essential for cell wall rigidity; involved in ER quality control; amino terminus faces cytoplasm, carboxyl terminus faces ER lumen	01_07_01	1D1	04_E_04	SWAT	ER	cytosol,ER	nucleus	ER	ER	Same	1	0	0	#N/A	11	51	71.9001	38.8293	79.7724	39.95	#N/A	#N/A	26.38	93.5	74.7	7345900000	171	321.61	10.3	0		0	0	0	0	0	0	0	endoplasmic reticulum	0	endoplasmic reticulum	0	#N/A	#N/A	#N/A	0	01
YGR192C	TDH3	Glyceraldehyde-3-phosphate dehydrogenase (GAPDH), isozyme 3; involved in glycolysis and gluconeogenesis; tetramer that catalyzes the reaction of glyceraldehyde-3-phosphate to 1,3 bis-phosphoglycerate; detected in the cytoplasm and cell wall; GAPDH-derived antimicrobial peptides secreted by S. cerevisiae are active against a wide variety of wine-related yeasts and bacteria; binds AU-rich RNA	01_07_02	2D1	16_G_02	SWAT	cytosol,nucleus	cytosol,nucleus	punctate	nucleus,cytosol	nucleus	Same	2	0	0	#N/A	0	None	437.708	18.0776	673.849	100.117	#N/A	#N/A	3726.2	#N/A	11769.4	1360000000000	#N/A	#N/A	#N/A	0		0	0	0	0	0	0	0	cell periphery:cytoplasm:lipid particle:mitochondria	cell periphery:cytoplasm:lipid particle:mitochondria	cytoplasm	cell periphery:cytoplasm:mitochondria	#N/A	#N/A	#N/A	ENSG00000105679	01
YDR229W	IVY1	Phospholipid-binding protein that interacts with both Ypt7p and Vps33p; may partially counteract the action of Vps33p and vice versa, localizes to the rim of the vacuole as cells approach stationary phase	01_07_03	1D2	09_G_06	SWAT	punctate,vacuole membrane	punctate,vacuole membrane	punctate,vacuole membrane	vacuole membrane	punctate	Same	2	0	0	#N/A	0	None	67.5578	21.3702	105.419	52.4151	#N/A	#N/A	15.64	100.5	18.8	565330000	36	32.81	8.9	0		0	0	0	0	0	0	0	vacuolar membrane:vacuole	vacuolar membrane	vacuolar membrane:vacuole	0	#N/A	#N/A	#N/A	0	01
YHR214C-D	YHR214C-D	Putative protein of unknown function; identified by gene-trapping, microarray-based expression analysis, and genome-wide homology searching; SWAT-GFP and mCherry fusion proteins localize to the nucleus and endoplasmic reticulum respectively; YHR214C-D has a paralog, YAR069C, that arose from a segmental duplication	01_07_04	2D2	11_C_08	SWAT	nucleus	ER,punctate	below threshold	missing	below threshold	New	1	0	0	#N/A	2	27	59.7209	16.9951	67.6752	22.9002	#N/A	#N/A	#N/A	#N/A	0	#N/A	#N/A	#N/A	#N/A	0		0	0	0	0	0	0	0	cellular_component:integral component of membrane:membrane	0	0	0	#N/A	#N/A	#N/A	0	01
YDL099W	BUG1	Cis-golgi localized protein involved in ER to Golgi transport; forms a complex with the mammalian GRASP65 homolog, Grh1p; mutants are compromised for the fusion of ER-derived vesicles with Golgi membranes	01_07_05	1D3	11_B_06	SWAT	punctate	punctate	punctate	punctate,punctate	below threshold	Same	1	0	0	#N/A	0	None	95.4718	44.2337	39.0176	36.3536	#N/A	#N/A	44.65	196.5	77.9	1788100000	63	56.29	9.4	0		0	0	0	0	0	0	0	Golgi:cytoplasm	Golgi	Golgi:cytoplasm	cytoplasm	#N/A	#N/A	#N/A	0	01
YGR197C	SNG1	Protein involved in resistance to nitrosoguanidine and 6-azauracil; expression is regulated by transcription factors involved in multidrug resistance; SNG1 has a paralog, YJR015W, that arose from the whole genome duplication	01_07_06	2D3	07_C_07	SWAT	cell periphery,punctate	cell periphery,vacuole	below threshold	below threshold	cell periphery	New	2	0	0	#N/A	6	109	65.0397	23.5709	108.649	34.2324	#N/A	#N/A	16.38	#N/A	3.6	#N/A	29	20.78	13.9	0		0	0	0	0	0	0	0	cell periphery	cell periphery	0	0	#N/A	3.5	#N/A	0	01
YDR233C	RTN1	Reticulon protein; involved in nuclear pore assembly and maintenance of tubular ER morphology; promotes membrane curvature; regulates the ER asymmetry-induced inheritance block during ER stress; role in ER-derived peroxisomal biogenesis; increases tubular ER when overexpressed; mutants have reduced phosphatidylserine transfer between the ER and mitochondria; interacts with exocyst subunit Sec6p, …	01_07_07	1D4	08_C_07	SWAT	cell periphery,ER,punctate	cell periphery,ER,punctate	cell periphery,ER,punctate	ER,cell periphery	cell periphery,punctate	Same	3	0	0	#N/A	2	49	208.14	98.3956	306.758	66.7372	#N/A	#N/A	332.41	2648	414.2	60414000000	300	467.45	9.1	0		0	0	0	0	0	0	0	Golgi:endoplasmic reticulum:mitochondria	Golgi:endoplasmic reticulum	endoplasmic reticulum	endoplasmic reticulum:mitochondria	inviable	1	#N/A	0	01
YHR214C-E	YHR214C-E	Putative protein of unknown function; identified by gene-trapping, microarray-based expression analysis, and genome-wide homology searching	01_07_08	2D4	11_E_12	SWAT	below threshold	below threshold	below threshold	missing	#N/A	0	0	0	0	#N/A	1	14	14.9677	16.9421	6.52164	23.7846	#N/A	#N/A	#N/A	#N/A	0	#N/A	#N/A	#N/A	#N/A	0		0	0	0	0	0	0	0	cellular_component	0	0	0	#N/A	#N/A	#N/A	0	01
YDL100C	GET3	Guanine nucleotide exchange factor for Gpa1p; amplifies G protein signaling; functions as a chaperone under ATP-depleted oxidative stress conditions; subunit of GET complex, involved in ATP dependent Golgi to ER trafficking and insertion of tail-anchored (TA) proteins into ER membrane under non-stress conditions; binds as dimer to transmembrane domain (TMD) cargo, shielding TMDs from aqueous solv…	01_07_09	1D5	12_G_11	SWAT	cytosol	cytosol	cytosol	ER	cytosol	Different	1	0	0	#N/A	0	None	271.431	128.538	414.366	68.9837	#N/A	#N/A	88.94	378	217.9	21605000000	19	439.59	23.4	0		0	0	0	0	0	0	0	Golgi:cytoplasm:endoplasmic reticulum	0	Golgi:cytoplasm:endoplasmic reticulum	endoplasmic reticulum	#N/A	#N/A	#N/A	ENSG00000198356	01
YGR198W	YPP1	Cargo-transport protein involved in endocytosis; interacts with phosphatidylinositol-4-kinase Stt4p; is required, along with Efr3p, for the assembly and recruitment of multiple copies of the kinase into phosphoinositide kinase (PIK) patches at the plasma membrane; positively regulates Stt4p; GFP-fusion protein localizes to the cytoplasm; YGR198W is an essential gene	01_07_10	2D5	28_E_7	SWAT	cytosol,nucleus	cytosol,nucleus	cell periphery,punctate	punctate	cytosol	Different	2	0	0	#N/A	0	None	72.3872	26.3949	52.488	37.216	#N/A	#N/A	26.19	#N/A	8.9	146140000	16	63.79	7.8	0		0	0	0	0	0	0	0	actin:cell periphery:cytoplasm:endosome	actin:cell periphery:cytoplasm:endosome	cell periphery	cell periphery:cytoplasm	inviable	#N/A	#N/A	0	01
YDR234W	LYS4	Homoaconitase; catalyzes the conversion of homocitrate to homoisocitrate, which is a step in the lysine biosynthesis pathway	01_07_11	1D6	03_G_02	Blank	Blank	Blank	Blank	Remove	Remove	Blank	Remove	Remove	Remove	Remove	Remove	Remove	Remove	Remove	Remove	Remove	Remove	Remove	Remove	Remove	Remove	Remove	Remove	Remove	Remove	Remove	Remove	0	0	Remove	0	0	0	1	Remove	Remove	Remove	Remove	Remove	Remove	Remove	Remove	01
YIL004C	BET1	Type II membrane protein required for vesicular transport; required for vesicular transport between the endoplasmic reticulum and Golgi complex; v-SNARE with similarity to synaptobrevins	01_07_12	2D6	28_B_3	SWAT	punctate	punctate,vacuole	below threshold	ambiguous	punctate	New	1	0	0	#N/A	1	120	31.8272	17.5468	89.023	43.0709	#N/A	#N/A	#N/A	#N/A	74.6	529160000	#N/A	66.2	26.6	Tail Anchored		1	0	0	0	0	0	0	COPII vesicle:Golgi:endoplasmic reticulum	COPII vesicle:endoplasmic reticulum	Golgi:endoplasmic reticulum	0	inviable	2.5	#N/A	0	01
YDL113C	ATG20	Sorting nexin family member; required for the cytoplasm-to-vacuole targeting (Cvt) pathway and for endosomal sorting; has a Phox homology domain that binds phosphatidylinositol-3-phosphate; interacts with Snx4p; potential Cdc28p substrate	01_07_13	1D7	13_G_11	SWAT	punctate	cytosol,punctate	below threshold	punctate	cytosol	Same	1	0	0	#N/A	0	None	65.5273	23.6703	48.7804	38.5915	#N/A	#N/A	17.5	#N/A	7.4	471010000	55	32.53	10.8	0		0	0	0	0	0	0	0	autophagosome:endosome	autophagosome:endosome	autophagosome:endosome	0	#N/A	#N/A	#N/A	0	01
YGR199W	PMT6	Protein O-mannosyltransferase; transfers mannose from dolichyl phosphate-D-mannose to protein serine/threonine residues of secretory proteins; reaction is essential for cell wall rigidity; member of a family of mannosyltransferases	01_07_14	2D7	06_A_12	SWAT	ER	ER	ER	below threshold	ER	New	1	0	0	#N/A	8	159	80.6444	29.226	112.38	37.8138	#N/A	#N/A	16.78	#N/A	13.1	371690000	#N/A	48.24	13.4	0		0	0	0	0	0	0	0	endoplasmic reticulum	0	endoplasmic reticulum	0	#N/A	#N/A	#N/A	ENSG00000009830	01
YDR238C	SEC26	Essential beta-coat protein of the COPI coatomer; involved in ER-to-Golgi protein trafficking and maintenance of normal ER morphology; shares 43% sequence identity with mammalian beta-coat protein (beta-COP)	01_07_15	1D8	14_E_10	SWAT	punctate	punctate	punctate,vacuole	punctate,punctate	punctate	Same	1	0	0	#N/A	0	None	131.962	57.5417	63.4107	37.2148	#N/A	#N/A	139.85	1059.5	68.6	9369100000	#N/A	252.55	11.4	0		0	0	0	0	0	0	0	COPI vesicle:Golgi:cytoplasm:endosome	COPI vesicle:endosome	COPI vesicle:Golgi:cytoplasm	0	inviable	1.5	#N/A	ENSG00000129083	01
YIL009C-A	EST3	Component of the telomerase holoenzyme; involved in telomere replication; synthesis of the full-length protein results from a programmed +1 ribosomal frameshift	01_07_16	2D8	15_G_07	SWAT	cytosol	cytosol	below threshold	below threshold	below threshold	New	1	0	0	#N/A	0	None	58.5914	17.4177	15.844	25.694	#N/A	#N/A	17.45	#N/A	15.2	#N/A	#N/A	#N/A	23.9	0		0	0	0	0	0	1	0	nucleus	nucleus	nucleus	0	#N/A	#N/A	81	0	01
YDL121C	YDL121C	Putative protein of unknown function; green fluorescent protein (GFP)-fusion protein localizes to the endoplasmic reticulum; YDL121C is not an essential protein	01_07_17	1D9	08_C_11	SWAT	ER,punctate	ER,vacuole	below threshold	ER	below threshold	Same	2	0	0	#N/A	1	6	103.504	18.9148	241.084	24.6797	#N/A	#N/A	71.61	277.7	125.1	640690000	300	168.45	56.1	0		0	0	0	0	0	0	0	endoplasmic reticulum	endoplasmic reticulum	endoplasmic reticulum	endoplasmic reticulum	#N/A	#N/A	#N/A	0	01
YGR202C	PCT1	Cholinephosphate cytidylyltransferase; a rate-determining enzyme of the CDP-choline pathway for phosphatidylcholine synthesis, inhibited by Sec14p, activated upon lipid-binding; contains an element within the regulatory domain involved in both silencing and activation of enzymatic activity	01_07_18	2D9	12_B_10	SWAT	nuclear periphery	vacuole membrane	nuclear periphery	nuclear periphery	nuclear periphery	Same	1	0	0	#N/A	0	None	102.483	37.8844	137.872	34.813	#N/A	#N/A	29.04	191	27.4	676840000	26	42.02	11.8	0		0	0	0	0	0	0	0	Golgi:nuclear membrane:nucleus	Golgi:nuclear membrane:nucleus	0	0	#N/A	#N/A	#N/A	ENSG00000102230	01
YDR244W	PEX5	Peroxisomal membrane signal receptor for peroxisomal matrix proteins; receptor for the C-terminal tripeptide signal sequence (PTS1) of peroxisomal matrix proteins; required for peroxisomal matrix protein import; also proposed to have PTS1-receptor independent functions	01_07_19	1D10	02_G_12	SWAT	punctate	cytosol	punctate	punctate	punctate	Same	1	0	0	#N/A	0	None	71.6123	40.3077	89.8795	43.1118	#N/A	#N/A	24.97	#N/A	13.1	475140000	23	36.11	8	Peroxisome	0	0	0	0	0	0	0	0	cytoplasm:peroxisome	cytoplasm:peroxisome	cytoplasm:peroxisome	0	#N/A	4	#N/A	ENSG00000139197	01
YIL013C	PDR11	ATP-binding cassette (ABC) transporter; multidrug transporter involved in multiple drug resistance; mediates sterol uptake when sterol biosynthesis is compromised; regulated by Pdr1p; required for anaerobic growth; PDR11 has a paralog, AUS1, that arose from the whole genome duplication	01_07_20	2D10	05_H_09	SWAT	cell periphery	cell periphery,vacuole	below threshold	below threshold	cell periphery	New	1	0	0	#N/A	14	384	92.0383	18.3078	109.568	40.2635	#N/A	#N/A	14.66	#N/A	0.3	#N/A	#N/A	4.53	7.2	0		0	0	0	0	0	0	0	integral component of membrane:membrane	0	0	0	#N/A	#N/A	81	0	01
Control-his3d-SWAT	None	#N/A	01_07_21	1D11	#N/A	SWAT	cytosol	cytosol	below threshold	#N/A	missing	#N/A	#N/A	0	#N/A	#N/A	#N/A	#N/A	240.723	16.0741	192.556	32.4594	#N/A	#N/A	#N/A	#N/A	#N/A	#N/A	#N/A	#N/A	#N/A	#N/A	#N/A	0	0	#N/A	0	0	0	0	#N/A	#N/A	#N/A	#N/A	#N/A	#N/A	#N/A	#N/A	01
Control-his3d-SWAT	None	#N/A	01_07_22	2D11	#N/A	SWAT	cytosol	cytosol	below threshold	#N/A	missing	#N/A	#N/A	0	#N/A	#N/A	#N/A	#N/A	240.908	18.0627	167.574	32.8038	#N/A	#N/A	#N/A	#N/A	#N/A	#N/A	#N/A	#N/A	#N/A	#N/A	#N/A	0	0	#N/A	0	0	0	0	#N/A	#N/A	#N/A	#N/A	#N/A	#N/A	#N/A	#N/A	01
YDR245W	MNN10	Subunit of a Golgi mannosyltransferase complex; complex mediates elongation of the polysaccharide mannan backbone; membrane protein of the mannosyltransferase family; other members of the complex are Anp1p, Mnn9p, Mnn11p, and Hoc1p	01_07_23	1D12	02_E_01	SWAT	ER,punctate	ER,punctate	punctate	punctate	punctate	Same	2	0	0	#N/A	1	50	69.3193	27.8175	52.4612	35.2342	#N/A	#N/A	14.07	161	54.3	471140000	84	147.27	12.7	Palmitoylation		0	0	0	1	0	0	0	Golgi:endoplasmic reticulum	0	Golgi:endoplasmic reticulum	0	#N/A	#N/A	#N/A	0	01
YIL016W	SNL1	Ribosome-associated protein; proposed to act in protein synthesis and nuclear pore complex biogenesis and maintenance as well as protein folding; has similarity to the mammalian BAG-1 protein	01_07_24	2D12	08_G_11	SWAT	punctate	punctate	below threshold	ER	below threshold	Different	1	0	0	#N/A	1	20	137.534	19.7498	210.719	24.0505	#N/A	#N/A	47.46	328	97.5	2685400000	4664	118.86	11.8	0		0	0	0	0	0	0	0	endoplasmic reticulum:mitochondria:nuclear membrane:nucleus	endoplasmic reticulum:nuclear membrane	endoplasmic reticulum:nuclear membrane:nucleus	mitochondria	#N/A	#N/A	#N/A	0	01
Control-his3d-GFPdC	None	#N/A	01_07_25	1D13	#N/A	SWAT	below threshold	below threshold	below threshold	#N/A	missing	#N/A	#N/A	0	#N/A	#N/A	#N/A	#N/A	13.9049	16.4986	0	#N/A	#N/A	#N/A	#N/A	#N/A	#N/A	#N/A	#N/A	#N/A	#N/A	#N/A	#N/A	0	0	#N/A	0	0	0	0	#N/A	#N/A	#N/A	#N/A	#N/A	#N/A	#N/A	#N/A	01
Control-his3d-GFPdC	None	#N/A	01_07_26	2D13	#N/A	SWAT	below threshold	below threshold	below threshold	#N/A	missing	#N/A	#N/A	0	#N/A	#N/A	#N/A	#N/A	13.4502	17.186	6.85577	0	#N/A	#N/A	#N/A	#N/A	#N/A	#N/A	#N/A	#N/A	#N/A	#N/A	#N/A	0	0	#N/A	0	0	0	0	#N/A	#N/A	#N/A	#N/A	#N/A	#N/A	#N/A	#N/A	01
YDR246W	TRS23	Core component of transport protein particle (TRAPP) complexes I-III; TRAPP complexes are related multimeric guanine nucleotide-exchange factor for the GTPase Ypt1p, regulating ER-Golgi traffic (TRAPPI), intra-Golgi traffic (TRAPPII), endosome-Golgi traffic (TRAPPII and III) and autophagy (TRAPPIII); human homolog is TRAPPC4	01_07_27	1D14	28_B_7	SWAT	punctate	cytosol	punctate	punctate	below threshold	Same	1	0	0	#N/A	0	None	69.6014	35.7948	61.9639	28.2922	#N/A	#N/A	18.91	116	21.3	158940000	#N/A	29.89	10.4	0		0	0	0	0	0	0	0	Golgi:autophagosome:endoplasmic reticulum	0	Golgi:autophagosome:endoplasmic reticulum	0	inviable	#N/A	#N/A	ENSG00000196655	01
YIL023C	YKE4	Zinc transporter; localizes to the ER; null mutant is sensitive to calcofluor white, leads to zinc accumulation in cytosol; ortholog of the mouse KE4 and member of the ZIP (ZRT, IRT-like Protein) family	01_07_28	2D14	15_D_03	SWAT	ER	ER	below threshold	below threshold	below threshold	New	1	0	6	19	5	47	57.1888	13.5813	57.0653	23.8704	#N/A	#N/A	16.22	#N/A	18.9	#N/A	#N/A	35.28	14	0		0	0	0	0	0	0	0	endoplasmic reticulum	endoplasmic reticulum	endoplasmic reticulum	0	#N/A	#N/A	#N/A	ENSG00000104635	01
YDL122W	UBP1	Ubiquitin-specific protease; removes ubiquitin from ubiquitinated proteins; cleaves at the C terminus of ubiquitin fusions irrespective of their size; capable of cleaving polyubiquitin chains	01_07_29	1D15	15_A_12	SWAT	ER	ER	ER	cytosol	below threshold	Different	1	0	0	#N/A	1	34	81.9837	29.3484	84.05	26.3416	#N/A	#N/A	59.69	#N/A	19.8	2730200000	38	97.09	6.1	0		0	0	0	0	0	0	0	cytoplasm:endoplasmic reticulum	cytoplasm:endoplasmic reticulum	0	0	#N/A	#N/A	#N/A	0	01
YGR206W	MVB12	ESCRT-I subunit required to stabilize ESCRT-I core complex oligomers; the ESCRT-I core complex (Stp22p, Vps28p, Srn2p) is involved in ubiquitin-dependent sorting of proteins into the endosome; deletion mutant is sensitive to rapamycin and nystatin	01_07_30	2D15	13_G_01	SWAT	below threshold	below threshold	punctate	punctate	#N/A	Different	1	0	0	#N/A	0	None	14.71	16.7898	0	0	#N/A	#N/A	22.72	#N/A	61.5	#N/A	16	47.75	60.4	0		0	0	0	0	0	0	0	cytoplasm:endosome	cytoplasm:endosome	cytoplasm:endosome	endosome	#N/A	#N/A	#N/A	0	01
YDR255C	RMD5	Component of GID Complex that confers ubiquitin ligase (U3) activity; necessary for polyubiquitination and degradation of the gluconeogenic enzyme fructose-1,6-bisphosphatase; forms dimer with Fyv10p that is then recruited to GID Complex by Gid8p; also required for sporulation; conserved protein that has a degenerate RING finger domain	01_07_31	1D16	13_G_09	SWAT	nucleus	nucleus	below threshold	below threshold	below threshold	New	1	0	0	#N/A	1	302	54.0077	15.5309	24.0349	26.9089	#N/A	#N/A	17.83	#N/A	3.8	105800000	#N/A	25.48	7.8	0		0	0	0	0	0	0	0	cytoplasm	cytoplasm	cytoplasm	0	#N/A	#N/A	#N/A	ENSG00000153561	01
YIL029C	YIL029C	Putative protein of unknown function; deletion confers sensitivity to 4-(N-(S-glutathionylacetyl)amino) phenylarsenoxide (GSAO); YIL029C has a paralog, YPR071W, that arose from a single-locus duplication	01_07_32	2D16	11_B_09	SWAT	below threshold	below threshold	below threshold	below threshold	#N/A	0	0	0	0	#N/A	2	31	14.038	17.9662	5.09362	22.9156	#N/A	#N/A	16.35	#N/A	0	#N/A	#N/A	9.7	31.4	0		0	0	0	0	0	0	0	integral component of membrane:membrane	0	0	0	#N/A	#N/A	#N/A	0	01
YDL123W	SNA4	Protein of unknown function; localized to the vacuolar outer membrane; predicted to be palmitoylated	01_07_33	1D17	02_D_03	SWAT	vacuole membrane	vacuole membrane	vacuole membrane	vacuole membrane	below threshold	Same	1	0	0	#N/A	2	13	66.8262	19.1741	104.058	26.6898	#N/A	#N/A	92.64	278.9	22.5	#N/A	63	27.42	6.8	Palmitoylation		0	0	0	1	0	0	0	vacuolar membrane:vacuole	vacuolar membrane:vacuole	vacuolar membrane:vacuole	0	#N/A	#N/A	#N/A	0	01
YGR213C	RTA1	Protein involved in 7-aminocholesterol resistance; has seven potential membrane-spanning regions; expression is induced under both low-heme and low-oxygen conditions; member of the fungal lipid-translocating exporter (LTE) family of protein; RTA1 has a paralog, YLR046C, that arose from the whole genome duplication	01_07_34	2D17	07_C_03	SWAT	ER	ER,vacuole	below threshold	below threshold	below threshold	New	1	0	0	#N/A	7	15	52.6198	18.9164	21.9672	22.8971	#N/A	#N/A	16.11	#N/A	0.4	#N/A	#N/A	1.24	44.3	0		0	0	0	0	0	0	0	cell periphery	cell periphery	0	0	#N/A	#N/A	#N/A	0	01
YDR256C	CTA1	Catalase A; breaks down hydrogen peroxide in the peroxisomal matrix formed by acyl-CoA oxidase (Pox1p) during fatty acid beta-oxidation	01_07_35	1D18	02_H_08	SWAT	punctate	punctate	below threshold	below threshold	punctate	New	1	0	0	#N/A	0	None	68.5423	15.7839	94.6561	28.4384	#N/A	#N/A	14.15	#N/A	0	#N/A	31	1.62	10.7	Peroxisome	0	0	0	0	0	0	0	1	mitochondria:peroxisome	mitochondria:peroxisome	peroxisome	0	#N/A	#N/A	#N/A	ENSG00000121691	01
YIL030C	SSM4	Membrane-embedded ubiquitin-protein ligase; ER and inner nuclear membrane localized RING-CH domain E3 ligase involved in ER-associated protein degradation (ERAD); targets misfolded cytosolic/nucleoplasmic domains of soluble and membrane embedded proteins (ERAD-C) and a transmembrane domain containing substrate (ERAD-M), Sbh2p; C-terminal element (CTE), conserved in human ortholog MARCH10/TEB4, de…	01_07_36	2D18	05_A_02	SWAT	ER	ER	ER	ER	below threshold	Same	1	0	0	#N/A	16	130	87.7988	34.4576	82.4306	25.8192	#N/A	#N/A	29.74	100.5	17.2	517490000	6	103.88	8.4	0		0	0	0	0	0	0	0	endoplasmic reticulum:nuclear membrane:nucleus	endoplasmic reticulum:nuclear membrane	endoplasmic reticulum:nuclear membrane:nucleus	0	#N/A	#N/A	#N/A	ENSG00000145495	01
YDL126C	CDC48	AAA ATPase; subunit of polyUb-selective segregase complex involved in ERAD, INM-associated degradation (INMAD), mitotic spindle disassembly, macroautophagy, PMN, ribosome-associated degradation, ribophagy, homotypic ER membrane fusion, SCF complex disassembly, cell wall integrity during heat stress, and telomerase regulation; mobilizes membrane-anchored transcription factors by regulated Ub/prote…	01_07_37	1D19	16_C_01	SWAT	missing	missing	missing	nucleus,cytosol	#N/A	Same	2	0	0	#N/A	0	None	0	0	#N/A	#N/A	#N/A	#N/A	227.7	1576	286.8	91224000000	34	771.64	#N/A	0		0	0	0	0	0	0	0	cytoplasm:endoplasmic reticulum:mitochondria:nucleus	cytoplasm:endoplasmic reticulum:mitochondria:nucleus	endoplasmic reticulum	0	inviable	1.5	#N/A	ENSG00000165280	01
YGR216C	GPI1	Membrane protein involved in the synthesis of GlcNAc-PI; N-acetylglucosaminyl phosphatidylinositol (GlcNAc-PI) is the first intermediate in the synthesis of glycosylphosphatidylinositol (GPI) anchors; human and mouse GPI1p are functional homologs	01_07_38	2D19	07_F_06	SWAT	ER	below threshold	below threshold	below threshold	#N/A	New	1	0	0	#N/A	7	187	21.4593	20.447	6.20852	22.9773	#N/A	#N/A	18.83	#N/A	4.4	#N/A	102	28.28	20.7	0		0	0	0	0	0	0	0	glycosylphosphatidylinositol-N-acetylglucosaminyltransferase (GPI-GnT) complex:integral component of membrane:membrane	0	0	0	inviable	#N/A	#N/A	ENSG00000007541	01
YMR313C	TGL3	Bifunctional triacylglycerol lipase and LPE acyltransferase; major lipid particle-localized triacylglycerol (TAG) lipase; catalyzes acylation of lysophosphatidylethanolamine (LPE), a function which is essential for sporulation; protein level and stability of Tgl3p are markedly reduced in the absence of lipid droplets; required with Tgl4p for timely bud formation	01_07_39	1D20	02_A_03	SWAT	punctate	punctate	punctate	punctate,punctate	punctate	New	1	0	0	#N/A	0	None	42.9221	26.0711	48.6603	27.7711	#N/A	#N/A	30.36	78	8.4	123560000	21	41.17	11.1	ActiveX VT_ERROR:	ActiveX VT_ERROR:	0	0	ActiveX VT_ERROR:	0	0	0	0	ActiveX VT_ERROR:	ActiveX VT_ERROR:	ActiveX VT_ERROR:	ActiveX VT_ERROR:	#N/A	#N/A	#N/A	0	01
YIL037C	PRM2	Pheromone-regulated protein; predicted to have 4 transmembrane segments and a coiled coil domain; regulated by Ste12p; required for efficient nuclear fusion	01_07_40	2D20	28_E_10	SWAT	punctate,bud neck	cell periphery,vacuole	below threshold	vacuole	cytosol,punctate	Different	2	0	0	#N/A	4	20	41.7344	13.7716	86.9204	29.4565	#N/A	#N/A	15.6	#N/A	0	#N/A	#N/A	1.05	3.2	0		0	0	0	0	0	0	0	integral component of membrane:membrane	0	0	0	#N/A	#N/A	#N/A	0	01
YDL128W	VCX1	Vacuolar membrane antiporter with Ca2+/H+ and K+/H+ exchange activity; involved in control of cytosolic Ca2+ and K+ concentrations; has similarity to sodium/calcium exchangers, including the bovine Na+/Ca2+,K+ antiporter	01_07_41	1D21	05_D_11	SWAT	vacuole membrane	ER	vacuole membrane	ER	punctate,vacuole membrane	Different	1	0	0	#N/A	11	40	219.994	70.9204	276.246	34.3453	#N/A	#N/A	40.55	129.5	40.3	1985600000	35	115.67	11.4	0		0	0	0	0	0	0	0	vacuolar membrane:vacuole	vacuolar membrane:vacuole	vacuolar membrane:vacuole	0	#N/A	#N/A	#N/A	0	01
YGR221C	TOS2	Protein involved in localization of Cdc24p to the site of bud growth; may act as a membrane anchor; localizes to the bud neck and bud tip; potentially phosphorylated by Cdc28p; TOS2 has a paralog, SKG6, that arose from the whole genome duplication	01_07_42	2D21	14_F_01	SWAT	cytosol,bud	bud	bud	below threshold	cytosol	New	1	0	0	#N/A	1	38	52.619	20.684	76.5995	37.2504	#N/A	#N/A	15.36	#N/A	2.6	#N/A	140	14.48	4.7	0		0	0	0	0	0	0	0	bud neck/tip:cell periphery	bud neck/tip	bud neck/tip:cell periphery	0	#N/A	#N/A	#N/A	0	01
YDR265W	PEX10	Peroxisomal membrane E3 ubiquitin ligase; required for for Ubc4p-dependent Pex5p ubiquitination and peroxisomal matrix protein import; contains zinc-binding RING domain; mutations in human homolog cause various peroxisomal disorders	01_07_43	1D22	02_C_12	SWAT	punctate	punctate	below threshold	punctate	below threshold	Same	1	0	0	#N/A	2	107	41.4593	21.0952	25.1554	26.101	#N/A	#N/A	17.14	#N/A	6.3	#N/A	300	24.53	8.4	Peroxisome	0	0	0	0	0	0	0	0	peroxisome	peroxisome	peroxisome	0	#N/A	#N/A	#N/A	ENSG00000157911	01
YIL039W	TED1	GPI-glycan remodelase; conserved phosphoesterase domain-containing protein; acts together with Emp24p/Erv25p in cargo exit from the ER; functional ortholog of mammalian GPI-glycan remodelase PGAP5; deletion confers sensitivity to 4-(N-(S-glutathionylacetyl)amino) phenylarsenoxide (GSAO)	01_07_44	2D22	04_C_11	SWAT	ER	ER	ER	ER	ER	Same	1	0	0	#N/A	2	9	135.402	26.3929	248.752	37.146	#N/A	#N/A	#N/A	#N/A	46.1	1168700000	70	121.22	18.6	0		0	0	0	0	0	0	0	endoplasmic reticulum	0	endoplasmic reticulum	endoplasmic reticulum	#N/A	#N/A	#N/A	0	01
YDL133W	SRF1	Regulator of phospholipase D (Spo14p); interacts with Spo14p and regulates its catalytic activity; capable of buffering the toxicity of C16:0 platelet activating factor, a lipid that accumulates intraneuronally in Alzheimer's patients	01_07_45	1D23	07_E_11	SWAT	cell periphery,vacuole	cell periphery,vacuole	below threshold	missing	below threshold	New	2	0	0	#N/A	4	267	35.5356	19.6724	43.1701	30.375	#N/A	#N/A	#N/A	#N/A	8.2	50321000	#N/A	34.24	10.9	0		0	0	0	0	0	0	0	integral component of membrane:membrane	0	0	0	#N/A	#N/A	#N/A	0	01
YGR223C	HSV2	Phosphatidylinositol 3,5-bisphosphate-binding protein; plays a role in micronucleophagy; belongs to the PROPPIN family of proteins; predicted to fold as a seven-bladed beta-propeller; displays punctate cytoplasmic localization	01_07_46	2D23	09_D_04	SWAT	punctate,vacuole membrane	punctate,vacuole membrane	punctate	below threshold	ER,punctate	New	2	0	0	#N/A	0	None	68.097	18.5838	76.1241	35.219	#N/A	#N/A	17.21	#N/A	6.1	330660000	#N/A	32.3	13.7	0		0	0	0	0	0	0	0	cytoplasm:endosome:vacuole	cytoplasm:endosome:vacuole	endosome	0	#N/A	#N/A	#N/A	ENSG00000196998	01
YDR270W	CCC2	Cu(+2)-transporting P-type ATPase; required for export of copper from the cytosol into an extracytosolic compartment; similar to human proteins involved in Menkes and Wilsons diseases; protein abundance increases in response to DNA replication stress; affects TBSV model (+)RNA virus replication by regulating copper metabolism; human homologs ATP7A and ATP7B both complement yeast null mutant	01_07_47	1D24	04_F_05	SWAT	punctate	vacuole	below threshold	punctate	below threshold	Same	1	0	0	#N/A	8	262	33.099	22.572	29.125	26.2164	#N/A	#N/A	22.32	#N/A	3.9	#N/A	#N/A	34.8	7.4	0		0	0	0	0	0	0	0	Golgi	Golgi	Golgi	0	#N/A	#N/A	#N/A	0	01
YIL040W	APQ12	Nuclear envelope/ER integral membrane protein; interacts and functions with Brr6p and Brl1p in lipid homeostasis; mutants are defective in nuclear pore complex biogenesis, nuclear envelope morphology, mRNA export from the nucleus and are sensitive to sterol biosynthesis inhibitors and membrane fluidizing agents; exhibits synthetic lethal genetic interactions with genes involved in lipid metabolism	01_07_48	2D24	04_B_10	SWAT	ER	ER,punctate	ER	ER	below threshold	Same	1	0	0	#N/A	2	40	57.9876	22.6851	68.6279	24.306	#N/A	#N/A	#N/A	166.3	86.2	375140	339	66.33	11.9	0		0	0	0	0	0	0	0	endoplasmic reticulum:nuclear membrane:nucleus	nuclear membrane	endoplasmic reticulum:nuclear membrane:nucleus	endoplasmic reticulum	#N/A	#N/A	#N/A	0	01
YLR145W	RMP1	Subunit of RNase MRP; RNase MRP processes pre-rRNA and has a role in cell cycle-regulated degradation of daughter cell-specific mRNAs; unlike most subunits, not shared between RNase MRP and nuclear RNase P	01_08_01	3D1	09_F_07	SWAT	nucleus	nucleus,nucleolus	nucleus	nucleus,cytosol	below threshold	Same	1	0	0	#N/A	1	85	29.506	26.9527	16.9699	25.7237	#N/A	#N/A	17.77	#N/A	16.1	#N/A	300	23.51	9.1	0		0	0	0	0	0	0	0	cytoplasm:nucleolus:nucleus	0	cytoplasm:nucleus	cytoplasm:nucleolus:nucleus	inviable	#N/A	#N/A	0	01
YOR115C	TRS33	Core component of TRAPP complexes I, II and IV; transport protein particle (TRAPP) complexes are related multimeric guanine nucleotide-exchange factor for the GTPase Ypt1p, regulating ER-Golgi traffic (TRAPPI), intra-Golgi traffic (TRAPPII), endosome-Golgi traffic (TRAPPII and III) and autophagy (TRAPPIII, and IV); proposed subunit of a novel complex, TRAPPIV, that may function redundantly with T…	01_08_02	4D1	14_C_07	SWAT	cytosol,punctate	cytosol,punctate	punctate	punctate	#N/A	Same	2	0	0	#N/A	0	None	93.2799	24.4902	96.2787	#N/A	#N/A	#N/A	19.81	#N/A	34.4	110990000	#N/A	55.09	32	0		0	0	0	0	0	0	0	Golgi:autophagosome:endoplasmic reticulum	Golgi	Golgi:autophagosome:endoplasmic reticulum	0	#N/A	#N/A	#N/A	ENSG00000007255	01
YML071C	COG8	Component of the conserved oligomeric Golgi complex; a cytosolic tethering complex (Cog1p through Cog8p) that functions in protein trafficking to mediate fusion of transport vesicles to Golgi compartments	01_08_03	3D2	09_F_03	SWAT	cytosol,punctate	cytosol	below threshold	punctate	cytosol	Same	2	0	0	#N/A	0	None	80.1484	18.5831	106.157	35.8321	#N/A	#N/A	#N/A	98	13.6	635860000	31	35.19	7.4	0		0	0	0	0	0	0	0	Golgi	Golgi	Golgi	0	#N/A	#N/A	#N/A	0	01
YPL140C	MKK2	MAPKK involved in the protein kinase C signaling pathway; involved in control of cell integrity; upon activation by Bck1p phosphorylates downstream target, Slt2p; functionally redundant with Mkk1p; MKK2 has a paralog, MKK1, that arose from the whole genome duplication	01_08_04	4D2	13_C_08	SWAT	cytosol	cytosol,punctate	below threshold	cytosol	#N/A	Same	1	0	0	#N/A	0	None	69.8507	16.1403	61.2486	0	#N/A	#N/A	15.53	#N/A	5.6	28367000	29	18.29	9.5	0		0	0	0	0	0	0	0	bud neck/tip:cytoplasm	bud neck/tip:cytoplasm	0	0	#N/A	#N/A	#N/A	0	01
YLR148W	PEP3	Component of CORVET membrane tethering complex; vacuolar peripheral membrane protein that promotes vesicular docking/fusion reactions in conjunction with SNARE proteins, required for vacuolar biogenesis	01_08_05	3D3	10_D_06	SWAT	punctate	punctate	below threshold	punctate	below threshold	Same	1	0	0	#N/A	0	None	46.6035	18.5622	40.6072	28.432	#N/A	#N/A	26.24	113.2	11.1	477300000	52	32.06	15.4	0		0	0	0	0	0	0	0	vacuolar membrane:vacuole	vacuolar membrane	vacuolar membrane:vacuole	0	#N/A	#N/A	#N/A	ENSG00000104142	01
YOR149C	SMP3	Alpha 1,2-mannosyltransferase; involved in glycosyl phosphatidyl inositol (GPI) biosynthesis; required for addition of the fourth, side branching mannose to the GPI core structure	01_08_06	4D3	15_G_03	SWAT	ER	ER,punctate	below threshold	below threshold	ER	New	1	0	6	25	9	6	61.4114	14.957	80.011	30.91	#N/A	#N/A	17.32	#N/A	4.8	#N/A	#N/A	28.99	10.6	0		0	0	0	0	0	0	0	endoplasmic reticulum	endoplasmic reticulum	endoplasmic reticulum	0	inviable	#N/A	#N/A	ENSG00000119227	01
YJL001W	PRE3	Beta 1 subunit of the 20S proteasome; responsible for cleavage after acidic residues in peptides	01_08_07	3D4	13_C_01	SWAT	cytosol	cytosol	below threshold	nucleus	cytosol,punctate	0	0	0	0	#N/A	0	None	94.8991	19.1048	239.425	34.4134	#N/A	#N/A	169.82	#N/A	170.1	2641900000	36	259.12	32	ActiveX VT_ERROR:	ActiveX VT_ERROR:	0	0	ActiveX VT_ERROR:	0	0	0	0	ActiveX VT_ERROR:	ActiveX VT_ERROR:	ActiveX VT_ERROR:	ActiveX VT_ERROR:	inviable	#N/A	#N/A	ENSG00000142507	01
YPL145C	KES1	One of seven members of the yeast oxysterol binding protein family; involved in negative regulation of Sec14p-dependent Golgi complex secretory functions, peripheral membrane protein that localizes to the Golgi complex; KES1 has a paralog, HES1, that arose from the whole genome duplication	01_08_08	4D4	01_C_11	SWAT	cytosol	cytosol,bud neck	cytosol	cytosol	#N/A	Same	1	0	0	#N/A	0	None	221.265	78.2057	172.111	0	#N/A	#N/A	144.3	994.5	109.3	18070000000	#N/A	240.86	11.5	Lipid droplet		0	0	0	0	0	0	0	Golgi:cytoplasm	Golgi:cytoplasm	0	cytoplasm	#N/A	4	#N/A	0	01
YLR151C	PCD1	8-oxo-dGTP diphosphatase; prevents spontaneous mutagenesis via sanitization of oxidized purine nucleoside triphosphates; can also act as peroxisomal pyrophosphatase with specificity for coenzyme A and CoA derivatives, may function to remove potentially toxic oxidized CoA disulfide from peroxisomes to maintain the capacity for beta-oxidation of fatty acids; nudix hydrolase family member; similar E…	01_08_09	3D5	02_C_09	SWAT	cytosol	cytosol	below threshold	below threshold	cytosol	New	1	0	0	#N/A	1	40	51.0572	21.4608	119.345	30.8809	#N/A	#N/A	15.76	#N/A	6.6	#N/A	31	12.74	8.5	Peroxisome	0	0	0	0	0	0	1	0	peroxisome	peroxisome	peroxisome	0	#N/A	#N/A	#N/A	0	01
YOR153W	PDR5	Plasma membrane ATP-binding cassette (ABC) transporter; multidrug transporter actively regulated by Pdr1p; also involved in steroid transport, cation resistance, and cellular detoxification during exponential growth; PDR5 has a paralog, PDR15, that arose from the whole genome duplication	01_08_10	4D5	03_D_10	SWAT	cell periphery	cell periphery,vacuole	missing	cell periphery	cell periphery	Same	1	0	0	#N/A	13	520	124.018	#N/A	91.772	42.7134	#N/A	#N/A	16.11	674.4	181.1	12024000000	89	1503.79	9.3	0		0	0	0	0	0	0	0	cell periphery:mitochondria	cell periphery	cell periphery	mitochondria	#N/A	#N/A	#N/A	0	01
YML075C	HMG1	HMG-CoA reductase; catalyzes conversion of HMG-CoA to mevalonate, which is a rate-limiting step in sterol biosynthesis; one of two isozymes; localizes to nuclear envelope; overproduction induces formation of karmellae; forms foci at nuclear periphery upon DNA replication stress; HMG1 has a paralog, HMG2, that arose from the whole genome duplication; human homolog HMGCR can complement yeast hmg1 m…	01_08_11	3D6	07_H_01	SWAT	ER,nuclear periphery	ER,nuclear periphery	punctate,nuclear periphery	nuclear periphery	ER,punctate	Same	1	0	0	#N/A	8	29	69.4183	47.6704	134.491	39.0161	#N/A	#N/A	47.2	169.6	10.9	2194200000	#N/A	84.33	7.2	0		0	0	0	0	0	0	0	endoplasmic reticulum:nuclear membrane:nucleus	endoplasmic reticulum:nuclear membrane	endoplasmic reticulum:nuclear membrane:nucleus	nuclear membrane	#N/A	#N/A	#N/A	ENSG00000114650	01
YPL147W	PXA1	Subunit of heterodimeric peroxisomal ABC transport complex, with Pxa2p; required for import of long-chain fatty acids into peroxisomes; similar to human adrenoleukodystrophy transporters ABCD1and ABCD2, and ALD-related proteins; mutations in ABCD1 cause X-linked adrenoleukodystrophy (X-ALD), a peroxisomal disorder; human ABCD1 and ABCD2 can each partially complement yeast pxa1 pxa2 double null mu…	01_08_12	4D6	02_C_07	SWAT	punctate	punctate	below threshold	below threshold	#N/A	New	1	0	0	#N/A	5	62	25.1418	19.3132	6.99294	24.1351	#N/A	#N/A	15.29	#N/A	0.6	#N/A	#N/A	6.79	11.9	Peroxisome	Pex19 signal (by Peroxisomes DB)	0	0	0	0	0	0	0	peroxisome	peroxisome	peroxisome	0	#N/A	#N/A	#N/A	ENSG00000101986	01
YLR152C	YLR152C	Putative protein of unknown function; YLR152C is not an essential gene	01_08_13	3D7	06_C_08	SWAT	ER	ER	missing	missing	below threshold	New	1	0	0	#N/A	10	6	21.1405	0	8.34424	25.0124	#N/A	#N/A	#N/A	#N/A	0.2	#N/A	#N/A	15.04	8.5	0		0	0	0	0	0	0	0	integral component of membrane:membrane	0	0	0	#N/A	3	#N/A	0	01
YOR157C	PUP1	Beta 2 subunit of the 20S proteasome; endopeptidase with trypsin-like activity that cleaves after basic residues; synthesized as a proprotein before being proteolytically processed for assembly into 20S particle; human homolog is subunit Z	01_08_14	4D7	13_C_11	SWAT	cytosol,nucleus	cytosol,nucleus	missing	nucleus,cytosol	cytosol	Same	2	0	0	#N/A	0	None	132.941	#N/A	149.713	38.3317	#N/A	#N/A	213.62	#N/A	181	4220000000	254	266.06	15.4	0		0	0	0	0	0	0	0	cytoplasm:endoplasmic reticulum:nucleus	endoplasmic reticulum:nucleus	cytoplasm:nucleus	0	inviable	#N/A	#N/A	ENSG00000136930	01
YML077W	BET5	Core component of transport protein particle (TRAPP) complexes I-III; TRAPP complexes are related multimeric guanine nucleotide-exchange factors for the GTPase Ypt1p, regulating ER-Golgi traffic (TRAPPI), intra-Golgi traffic (TRAPPII), endosome-Golgi traffic (TRAPPII and III) and autophagy (TRAPPIII); human homology TRAPPC1 complements yeast null mutant	01_08_15	3D8	10_E_11	SWAT	cytosol,punctate	punctate	punctate	below threshold	below threshold	New	1	0	0	#N/A	0	None	44.0157	33.3537	11.6471	25.6447	#N/A	#N/A	13.54	#N/A	63.2	#N/A	#N/A	72.43	72.5	0		0	0	0	0	0	0	0	Golgi:autophagosome:endoplasmic reticulum	0	Golgi:autophagosome:endoplasmic reticulum	0	inviable	#N/A	#N/A	ENSG00000170043	01
YPL149W	ATG5	Conserved protein involved in autophagy and the Cvt pathway; undergoes conjugation with Atg12p to form a complex involved in Atg8p lipidation; Atg5p-Atg12p conjugate enhances E2 activity of Atg3 by rearranging its catalytic site, also forms a complex with Atg16p; the Atg5-Atg12/Atg16 complex binds to membranes and is essential for autophagosome formation; also involved in methionine restriction e…	01_08_16	4D8	14_D_04	SWAT	cytosol,nucleus	cytosol,nucleus	below threshold	cytosol	below threshold	Same	2	0	0	#N/A	0	None	71.9283	19.3404	55.3526	26.7855	#N/A	#N/A	18.68	#N/A	6.2	#N/A	300	32.81	44.8	0		0	0	0	0	0	0	0	autophagosome:cytoplasm	autophagosome:cytoplasm	autophagosome:cytoplasm	0	#N/A	#N/A	#N/A	ENSG00000057663	01
YLR154C-G	YLR154C-G	Putative protein of unknown function; identified by fungal homology comparisons and RT-PCR; this ORF is contained within RDN25-2 and RDN37-2	01_08_17	3D9	01_G_06	SWAT	below threshold	below threshold	below threshold	missing	#N/A	0	0	0	0	#N/A	0	None	12.5546	18.7874	4.22957	24.1636	#N/A	#N/A	#N/A	#N/A	0	#N/A	#N/A	#N/A	#N/A	Farnesylation		0	0	0	0	1	0	0	cellular_component	0	0	0	#N/A	#N/A	6258	0	01
YOR161C	PNS1	Protein of unknown function; has similarity to Torpedo californica tCTL1p, which is postulated to be a choline transporter, neither null mutation nor overexpression affects choline transport	01_08_18	4D9	06_E_05	SWAT	cell periphery	cell periphery,vacuole	below threshold	cell periphery	cell periphery,punctate	Same	1	0	0	#N/A	12	83	111.259	23.3911	173.725	45.4843	#N/A	#N/A	18.63	#N/A	4.8	#N/A	43	38.62	9.6	0		0	0	0	0	0	0	0	cell periphery	cell periphery	cell periphery	cell periphery	#N/A	#N/A	#N/A	ENSG00000137968	01
YML081W	TDA9	Transcription factor that regulates acetate production; green fluorescent protein (GFP)-fusion protein localizes to the nucleus; null mutant is sensitive to expression of the top1-T722A allele; not an essential gene; TDA9 has a paralog, RSF2, that arose from the whole genome duplication	01_08_19	3D10	14_E_05	SWAT	nucleus	nucleus	nucleus	nucleus	nucleus	Same	1	0	0	#N/A	3	700	36.0936	25.5096	44.07	30.5702	#N/A	#N/A	21.81	#N/A	3.6	202860000	3	59.48	5.5	0		0	0	0	0	0	0	0	nucleus	0	nucleus	nucleus	#N/A	#N/A	#N/A	0	01
YPL156C	PRM4	Pheromone-regulated protein proposed to be involved in mating; predicted to have 1 transmembrane segment; transcriptionally regulated by Ste12p during mating and by Cat8p during the diauxic shift	01_08_20	4D10	04_B_05	SWAT	vacuole membrane	vacuole	below threshold	punctate	below threshold	Different	1	0	0	#N/A	1	20	46.0866	22.988	53.9453	25.4229	#N/A	#N/A	18.04	#N/A	11.9	10195000	#N/A	21.66	12	0		0	0	0	0	0	0	0	integral component of membrane:membrane	0	0	0	#N/A	#N/A	#N/A	0	01
Control-his3d-SWAT	None	#N/A	01_08_21	3D11	#N/A	SWAT	cytosol	cytosol	below threshold	#N/A	missing	#N/A	#N/A	0	#N/A	#N/A	#N/A	#N/A	225.13	19.6473	176.492	33.8211	#N/A	#N/A	#N/A	#N/A	#N/A	#N/A	#N/A	#N/A	#N/A	#N/A	#N/A	0	0	#N/A	0	0	0	0	#N/A	#N/A	#N/A	#N/A	#N/A	#N/A	#N/A	#N/A	01
Control-his3d-SWAT	None	#N/A	01_08_22	4D11	#N/A	SWAT	cytosol	cytosol	below threshold	#N/A	missing	#N/A	#N/A	0	#N/A	#N/A	#N/A	#N/A	261.381	19.1114	174.238	32.554	#N/A	#N/A	#N/A	#N/A	#N/A	#N/A	#N/A	#N/A	#N/A	#N/A	#N/A	0	0	#N/A	0	0	0	0	#N/A	#N/A	#N/A	#N/A	#N/A	#N/A	#N/A	#N/A	01
YML085C	TUB1	Alpha-tubulin; associates with beta-tubulin (Tub2p) to form tubulin dimer, which polymerizes to form microtubules; relative distribution to nuclear foci increases upon DNA replication stress; TUB1 has a paralog, TUB3, that arose from the whole genome duplication	01_08_23	3D12	02_G_05	SWAT	punctate	missing	missing	cytosol,punctate,punctate,punctate	punctate	Same	1	0	0	#N/A	0	None	278.687	#N/A	#N/A	55.7858	#N/A	#N/A	#N/A	507	149.1	4061500000	41	388.87	19.7	Palmitoylation		0	0	0	1	0	1	0	cytoplasm:cytoskeleton:microtubule:nucleus:spindle pole body	microtubule:spindle pole body	cytoplasm:cytoskeleton:microtubule	cytoplasm:nucleus	inviable	#N/A	#N/A	ENSG00000183785	01
YPL162C	YPL162C	Putative protein of unknown function; green fluorescent protein (GFP)-fusion protein localizes to the membrane of vacuole with cell cycle-correlated morphology	01_08_24	4D12	07_G_08	SWAT	nucleus	below threshold	below threshold	vacuole membrane	#N/A	Different	1	0	0	#N/A	5	12	23.4368	20.167	6.17063	0	#N/A	#N/A	37.34	151	16.2	2117000	2	36.05	10.2	0		0	0	0	0	0	0	0	vacuolar membrane:vacuole	0	vacuolar membrane:vacuole	vacuolar membrane	#N/A	#N/A	#N/A	ENSG00000248592	01
Control-his3d-GFPdC	None	#N/A	01_08_25	3D13	#N/A	SWAT	below threshold	below threshold	below threshold	#N/A	missing	#N/A	#N/A	0	#N/A	#N/A	#N/A	#N/A	10.6943	13.3571	4.30573	0	#N/A	#N/A	#N/A	#N/A	#N/A	#N/A	#N/A	#N/A	#N/A	#N/A	#N/A	0	0	#N/A	0	0	0	0	#N/A	#N/A	#N/A	#N/A	#N/A	#N/A	#N/A	#N/A	01
Control-his3d-GFPdC	None	#N/A	01_08_26	4D13	#N/A	SWAT	below threshold	below threshold	below threshold	#N/A	missing	#N/A	#N/A	0	#N/A	#N/A	#N/A	#N/A	12.1874	18.6237	5.10478	#N/A	#N/A	#N/A	#N/A	#N/A	#N/A	#N/A	#N/A	#N/A	#N/A	#N/A	#N/A	0	0	#N/A	0	0	0	0	#N/A	#N/A	#N/A	#N/A	#N/A	#N/A	#N/A	#N/A	01
YML087C	AIM33	Protein of unknown function, highly conserved across species; homolog of human CYB5R4; null mutant displays reduced frequency of mitochondrial genome loss; AIM33 has a paralog, PGA3, that arose from the whole genome duplication	01_08_27	3D14	11_E_08	SWAT	below threshold	below threshold	below threshold	below threshold	#N/A	0	0	0	0	#N/A	2	16	14.3225	19.6626	4.43014	23.6117	#N/A	#N/A	15.79	#N/A	1.3	#N/A	#N/A	4.57	22.6	0		0	0	0	0	0	0	0	cellular_component:integral component of membrane:membrane	0	0	0	#N/A	#N/A	#N/A	ENSG00000065615	01
YPR133W-A	TOM5	Component of the TOM (translocase of outer membrane) complex; responsible for recognition and initial import of all mitochondrially directed proteins; involved in transfer of precursors from the Tom70p and Tom20p receptors to the Tom40p pore	01_08_28	4D14	29_A_6	SWAT	mitochondria	mitochondria	below threshold	missing	mitochondria	New	1	0	0	#N/A	1	28	104.865	18.6367	202.313	58.8926	7.91999	6.28238	#N/A	#N/A	1278.6	4188200000	#N/A	#N/A	35.4	Mitochondria outer membrane		0	0	0	0	0	0	0	mitochondria	mitochondria	mitochondria	mitochondria	#N/A	2.5	#N/A	0	01
YLR166C	SEC10	Essential 100kDa subunit of the exocyst complex; the exocyst mediates polarized targeting and tethering of post-Golgi secretory vesicles to active sites of exocytosis at the plasma membrane prior to SNARE-mediated fusion	01_08_29	3D15	09_E_08	SWAT	cytosol,bud	bud neck	punctate,bud neck	bud neck	bud neck	Same	1	0	0	#N/A	0	None	71.7945	28.8989	46.1236	30.4662	#N/A	#N/A	NA	179	11.4	829190000	58	52.32	20.6	0		0	0	0	0	0	0	0	cytoplasm:exocyst	0	cytoplasm	0	inviable	#N/A	#N/A	ENSG00000070367	01
YOR161C-C	YOR161C-C	Protein of unknown function; identified by gene-trapping, microarray-based expression analysis, and genome-wide homology searching	01_08_30	4D15	13_D_03	SWAT	below threshold	below threshold	below threshold	missing	#N/A	0	0	0	0	#N/A	0	None	19.6731	19.7008	4.91799	23.1217	#N/A	#N/A	#N/A	#N/A	0	#N/A	#N/A	#N/A	8.7	0		0	0	0	0	0	0	0	cellular_component:integral component of membrane:membrane	0	0	0	#N/A	#N/A	#N/A	0	01
YML097C	VPS9	Guanine nucleotide exchange factor (GEF) and ubiquitin receptor; involved in vesicle-mediated vacuolar transport, including Golgi-endosome trafficking and sorting through the multivesicular body (MVB); stimulates the intrinsic guanine nucleotide exchange activity of Rab family members (Vps21p/Ypt52p/Ypt53p); partially redundant with GEF MUK1; required for localization of the CORVET complex to end…	01_08_31	3D16	15_E_10	SWAT	cytosol,punctate	cytosol,punctate	cytosol,punctate	cytosol	cytosol	Same	2	0	0	#N/A	0	None	51.9739	36.3248	76.1161	43.597	#N/A	#N/A	32.94	82.5	18.6	886420000	85	36.56	8.7	0		0	0	0	0	0	0	0	cytoplasm	cytoplasm	cytoplasm	0	#N/A	#N/A	#N/A	ENSG00000165219	01
YPL166W	ATG29	Autophagy-specific protein; required for recruiting other ATG proteins to the pre-autophagosomal structure (PAS); interacts with Atg17p and localizas to the PAS in a manner interdependent with Atg17p and Cis1p; not conserved; relocalizes from nucleus to cytoplasmic foci upon DNA replication stress	01_08_32	4D16	10_E_10	SWAT	cytosol,punctate	cytosol,punctate	punctate	nucleus,cytosol,punctate	cytosol	Same	2	0	0	#N/A	0	None	74.8285	23.7443	57.4235	28.7835	#N/A	#N/A	23.54	#N/A	17	179380000	48	14.33	11.3	0		0	0	0	0	0	0	0	autophagosome:cytoplasm:nucleus	autophagosome	autophagosome	cytoplasm:nucleus	#N/A	#N/A	#N/A	0	01
YLR170C	APS1	Small subunit of the clathrin-associated adaptor complex AP-1; AP-1 is involved in protein sorting at the trans-Golgi network; homolog of the sigma subunit of the mammalian clathrin AP-1 complex	01_08_33	3D17	14_E_04	SWAT	punctate	punctate	punctate	missing	below threshold	New	1	0	0	#N/A	0	None	66.2283	42.4604	37.1891	26.5226	#N/A	#N/A	#N/A	#N/A	118.4	#N/A	#N/A	67.2	22.5	0		0	0	0	0	0	0	0	Golgi:endosome	0	Golgi:endosome	0	#N/A	#N/A	#N/A	ENSG00000042753	01
YOR171C	LCB4	Sphingoid long-chain base kinase; responsible for synthesis of long-chain base phosphates, which function as signaling molecules, regulates synthesis of ceramide from exogenous long-chain bases, localizes to the Golgi and late endosomes; LCB4 has a paralog, LCB5, that arose from the whole genome duplication	01_08_34	4D17	02_G_04	SWAT	cell periphery	cell periphery,vacuole	ambiguous,punctate	cytosol	cell periphery	Different	1	0	0	#N/A	0	None	100.479	35.8611	114.672	32.0382	#N/A	#N/A	31.38	#N/A	22.6	3228700000	47	60.73	10.1	Palmitoylation		0	0	0	1	0	0	0	Golgi:cell periphery:endoplasmic reticulum:endosome	Golgi:cell periphery:endoplasmic reticulum	Golgi:cell periphery:endoplasmic reticulum:endosome	0	#N/A	#N/A	#N/A	ENSG00000100422	01
YML101C	CUE4	Protein of unknown function; has a CUE domain that binds ubiquitin, which may facilitate intramolecular monoubiquitination; CUE4 has a paralog, CUE1, that arose from the whole genome duplication	01_08_35	3D18	15_A_05	SWAT	nucleus	ER,punctate	ER	ER	below threshold	Different	1	0	6	19	1	6	90.452	34.4083	80.5824	24.7166	#N/A	#N/A	26.37	142.1	38.7	287460000	300	79.5	18.6	0		0	0	0	0	0	0	0	cytoplasm:endoplasmic reticulum	0	cytoplasm:endoplasmic reticulum	cytoplasm:endoplasmic reticulum	#N/A	#N/A	#N/A	0	01
YPL175W	SPT14	UDP-glycosyltransferase subunit of the GPI-GnT complex; UDP-GlcNAc-binding and catalytic subunit of the enzyme that mediates the first step in glycosylphosphatidylinositol (GPI) biosynthesis, mutations cause defects in transcription and in biogenesis of cell wall proteins	01_08_36	4D18	11_A_09	SWAT	cytosol	cytosol	cytosol	ambiguous	below threshold	New	1	0	0	#N/A	1	407	65.8731	37.2684	91.9435	24.7344	#N/A	#N/A	#N/A	#N/A	3.9	55839000	#N/A	25.26	11.8	0		0	0	0	0	0	0	0	endoplasmic reticulum	endoplasmic reticulum	endoplasmic reticulum	0	inviable	#N/A	#N/A	ENSG00000165195	01
YLR173W	YLR173W	Putative protein of unknown function	01_08_37	3D19	14_D_12	SWAT	vacuole membrane	vacuole membrane	below threshold	below threshold	vacuole membrane	New	1	0	0	#N/A	1	54	55.1481	23.2007	57.6863	36.1109	#N/A	#N/A	13.96	#N/A	2.5	#N/A	#N/A	20.72	9.6	0		0	0	0	0	0	0	0	vacuolar membrane	0	0	vacuolar membrane	#N/A	#N/A	#N/A	0	01
YOR175C	ALE1	Broad-specificity lysophospholipid acyltransferase; part of MBOAT family of membrane-bound O-acyltransferases; key component of Lands cycle; may have role in fatty acid exchange at sn-2 position of mature glycerophospholipids	01_08_38	4D19	07_D_03	SWAT	ER	ER	below threshold	ER	below threshold	Same	1	0	0	#N/A	9	12	49.4453	19.2829	33.3897	22.9292	#N/A	#N/A	15.9	#N/A	33.6	1043500000	300	126.81	13.9	0		0	0	KKxx	0	0	0	0	endoplasmic reticulum	endoplasmic reticulum	endoplasmic reticulum	endoplasmic reticulum	#N/A	#N/A	#N/A	ENSG00000111684	01
YML104C	MDM1	PtdIns-3-P binding protein that tethers the ER to vacuoles at NVJs; anchored in the ER membrane at nucleus-vacuole junctions and binds phosphatidylinositol 3-phosphate (PtdIns-3-P) in the vacuolar membrane via its Phox homology (PX) domain; expressed predominantly in late G1 to early S phase of the cell cycle; mutation affects nuclear and mitochondrial transmission to daughter buds; similar to 4 …	01_08_39	3D20	13_G_03	SWAT	cell periphery,punctate	cell periphery,punctate,vacuole	below threshold	ambiguous	below threshold	New	2	0	0	#N/A	1	12	49.9398	21.1488	89.4051	25.6705	#N/A	#N/A	18.63	#N/A	0.7	#N/A	3	36.99	10.9	0		0	0	0	0	0	0	0	cytoplasm	cytoplasm	cytoplasm	cytoplasm	#N/A	#N/A	#N/A	0	01
YPL176C	TRE1	Transferrin receptor-like protein; plasma membrane protein that binds Bsd2p and regulates ubiquitination and vacuolar degradation of the metal transporter Smf1p; functionally redundant with Tre2p; TRE1 has a paralog, TRE2, that arose from the whole genome duplication	01_08_40	4D20	09_H_05	SWAT	punctate,vacuole	vacuole	below threshold	below threshold	below threshold	New	2	0	0	#N/A	1	111	48.4426	22.3058	65.9709	25.5168	#N/A	#N/A	17.76	#N/A	10	65737000	3	46.64	8.8	0		0	0	0	0	0	0	0	cell periphery:vacuole	vacuole	cell periphery	0	#N/A	2.5	#N/A	0	01
YLR191W	PEX13	Peroxisomal importomer complex component; integral peroxisomal membrane protein required for docking and translocation of peroxisomal matrix proteins; interacts with the PTS1 signal recognition factor Pex5p and the PTS2 signal recognition factor Pex7p; forms a complex with Pex14p and Pex17p; human homolog PEX13 complements yeast null mutant	01_08_41	3D21	02_E_08	SWAT	punctate	punctate	punctate	punctate	punctate	Same	1	0	0	#N/A	1	260	40.525	26.9674	65.2844	30.4315	#N/A	#N/A	23.58	#N/A	12.4	348080000	44	32.38	8.2	Peroxisome	Pex19 signal (by Peroxisomes DB)	0	0	0	0	0	0	0	peroxisome	peroxisome	peroxisome	0	#N/A	2.5	#N/A	ENSG00000162928	01
YOR178C	GAC1	Regulatory subunit for Glc7p type-1 protein phosphatase (PP1); tethers Glc7p to Gsy2p glycogen synthase, binds Hsf1p heat shock transcription factor, required for induction of some HSF-regulated genes under heat shock; GAC1 has a paralog, PIG1, that arose from the whole genome duplication	01_08_42	4D21	15_E_03	SWAT	cytosol	below threshold	below threshold	below threshold	#N/A	New	1	0	6	0	0	None	37.634	21.1098	6.22877	25.0387	#N/A	#N/A	16.55	#N/A	0	#N/A	#N/A	0.68	8.8	0		0	0	0	0	0	0	0	protein phosphatase type 1 complex	0	0	0	#N/A	#N/A	#N/A	0	01
YML115C	VAN1	Component of the mannan polymerase I; complex contains Van1p and Mnn9p and is involved in the first steps of mannan synthesis; mutants are vanadate-resistant	01_08_43	3D22	04_H_06	SWAT	punctate	below threshold	punctate	vacuole,punctate	punctate	Same	1	0	0	#N/A	1	60	78.375	43.3022	0	32.7942	#N/A	#N/A	30.99	#N/A	31.1	884070000	2	98.8	8.6	0		0	0	0	0	0	0	0	Golgi:endoplasmic reticulum	0	Golgi:endoplasmic reticulum	0	#N/A	#N/A	#N/A	0	01
YPL180W	TCO89	Subunit of TORC1 (Tor1p or Tor2p-Kog1p-Lst8p-Tco89p); regulates global H3K56ac; TORC1 complex regulates growth in response to nutrient availability; cooperates with Ssd1p in the maintenance of cellular integrity; deletion strains are hypersensitive to rapamycin	01_08_44	4D22	12_B_04	SWAT	cytosol,vacuole membrane	cytosol	vacuole membrane	vacuole membrane	cytosol	Same	1	0	0	#N/A	0	None	50.7491	25.6127	27.5308	30.5944	#N/A	#N/A	25	#N/A	9	877440000	#N/A	35.6	8	0		0	0	0	0	0	0	0	cell periphery:vacuolar membrane:vacuole	cell periphery:vacuolar membrane	cell periphery:vacuolar membrane:vacuole	vacuolar membrane	#N/A	#N/A	#N/A	0	01
YLR206W	ENT2	Epsin-like protein required for endocytosis and actin patch assembly; functionally redundant with Ent1p; contains clathrin-binding motif at C-terminus; ENT2 has a paralog, ENT1, that arose from the whole genome duplication	01_08_45	3D23	12_C_05	SWAT	punctate	punctate	punctate	punctate	cytosol,punctate	Same	1	0	0	#N/A	0	None	94.8729	46.0958	108.307	43.8571	#N/A	#N/A	16.55	184	36.4	2687900000	18	98.51	9.1	0		0	0	0	0	0	0	0	actin:cytoplasm	actin	cytoplasm	0	#N/A	1.5	#N/A	0	01
YOR183W	FYV12	Protein of unknown function; required for survival upon exposure to K1 killer toxin	01_08_46	4D23	10_C_06	SWAT	below threshold	cytosol	below threshold	below threshold	#N/A	0	0	0	0	#N/A	1	109	21.038	18.9089	5.25169	24.2458	#N/A	#N/A	16.27	#N/A	1.5	#N/A	#N/A	0.76	#N/A	0		0	0	0	0	0	0	0	cellular_component:integral component of membrane:membrane	0	0	0	#N/A	#N/A	#N/A	0	01
YML116W	ATR1	Multidrug efflux pump of the major facilitator superfamily; required for resistance to aminotriazole and 4-nitroquinoline-N-oxide; ATR1 has a paralog, YMR279C, that arose from the whole genome duplication; protein abundance increases in response to DNA replication stress	01_08_47	3D24	01_E_02	SWAT	cell periphery	cell periphery,vacuole	cell periphery	cell periphery,vacuole	below threshold	Same	1	0	0	#N/A	13	108	38.6477	27.2912	62.2929	29.662	#N/A	#N/A	25.91	382.5	5.4	#N/A	19	21.79	7.8	Farnesylation		0	0	0	0	1	0	0	cell periphery:vacuole	cell periphery:vacuole	0	0	#N/A	#N/A	#N/A	0	01
YPL186C	UIP4	Protein that interacts with Ulp1p; a Ubl (ubiquitin-like protein)-specific protease for Smt3p protein conjugates; detected in a phosphorylated state in the mitochondrial outer membrane; also detected in ER and nuclear envelope	01_08_48	4D24	13_H_07	SWAT	ER	ER,punctate	mitochondria	below threshold	ER	New	1	0	0	#N/A	0	None	92.4772	24.4082	107.008	51.3087	#N/A	#N/A	17.1	#N/A	0.5	4151500	#N/A	5.99	10.2	0		0	0	0	0	0	0	0	endoplasmic reticulum:mitochondria:nuclear membrane:nucleus	endoplasmic reticulum:nuclear membrane	endoplasmic reticulum:mitochondria:nuclear membrane:nucleus	mitochondria	#N/A	#N/A	#N/A	0	01
YAL048C	GEM1	Outer mitochondrial membrane GTPase, subunit of the ERMES complex; potential regulatory subunit of the ERMES complex that links the ER to mitochondria and may promote inter-organellar calcium and phospholipid exchange as well as coordinating mitochondrial DNA replication and growth; cells lacking Gem1p contain collapsed, globular, or grape-like mitochondria; ortholog of metazoan Miro GTPases	01_09_01	1E1	29_C_4	SWAT	mitochondria	mitochondria	mitochondria	missing	punctate,mitochondria	New	1	0	0	#N/A	1	634	64.0374	21.1292	60.5549	31.3745	8.33376	10.4048	#N/A	#N/A	3.9	14482000	#N/A	19.11	10	Mitochondria outer membrane		0	0	0	0	0	1	0	ERMES complex:mitochondria	ERMES complex:mitochondria	mitochondria	mitochondria	#N/A	#N/A	#N/A	ENSG00000126858	01
Control-Blank	None	#N/A	01_09_02	2E1	#N/A	SWAT	below threshold	missing	missing	#N/A	missing	#N/A	#N/A	0	#N/A	#N/A	#N/A	#N/A	#N/A	0	#N/A	#N/A	#N/A	#N/A	#N/A	#N/A	#N/A	#N/A	#N/A	#N/A	#N/A	#N/A	#N/A	0	0	#N/A	0	0	0	0	#N/A	#N/A	#N/A	#N/A	#N/A	#N/A	#N/A	#N/A	01
YBR241C	YBR241C	Putative transporter, member of the sugar porter family; green fluorescent protein (GFP)-fusion protein localizes to the vacuolar membrane; YBR241C is not an essential gene; YBR241C has a paralog, VPS73, that arose from the whole genome duplication	01_09_03	1E2	06_C_03	SWAT	vacuole membrane	vacuole membrane	vacuole membrane	vacuole membrane	vacuole membrane	Same	1	0	0	#N/A	11	20	160.543	26.7702	187.855	48.2651	#N/A	#N/A	14.88	#N/A	2.6	#N/A	86	22.39	10.3	0		0	0	0	0	0	0	0	vacuolar membrane:vacuole	vacuolar membrane	vacuolar membrane:vacuole	vacuolar membrane	#N/A	2	#N/A	ENSG00000133460	01
YGL115W	SNF4	Activating gamma subunit of the AMP-activated Snf1p kinase complex; additional subunits of the complex are Snf1p and a Sip1p/Sip2p/Gal83p family member; activates glucose-repressed genes, represses glucose-induced genes; role in sporulation, and peroxisome biogenesis; protein abundance increases in response to DNA replication stress	01_09_04	2E2	10_A_10	SWAT	cytosol	cytosol	cytosol	cytosol	cytosol	Same	1	0	0	#N/A	0	None	102.384	68.2206	179.108	44.6201	#N/A	#N/A	19.5	235	55.5	467800000	300	143.36	19.8	0		0	0	0	0	0	0	0	cell periphery:cytoplasm:nuclear membrane:nucleus	cell periphery:cytoplasm:nuclear membrane:nucleus	cytoplasm:nucleus	0	#N/A	#N/A	#N/A	ENSG00000106617	01
YBL001C	ECM15	Non-essential protein of unknown function; likely exists as tetramer, may be regulated by the binding of small-molecule ligands (possibly sulfate ions), may have a role in yeast cell-wall biogenesis	01_09_05	1E3	15_H_04	SWAT	cytosol	cytosol	cytosol	nucleus,cytosol	cytosol	Same	1	0	6	0	0	None	309.95	64.0799	482.735	53.3946	#N/A	#N/A	26.26	#N/A	394.7	2508700000	124	280.62	#N/A	0		0	0	0	0	0	0	0	cytoplasm:nucleus	0	cytoplasm:nucleus	cytoplasm:nucleus	#N/A	#N/A	#N/A	0	01
YER031C	YPT31	Rab family GTPase; involved in the exocytic pathway; mediates intra-Golgi traffic or the budding of post-Golgi vesicles from the trans-Golgi; YPT31 has a paralog, YPT32, that arose from the whole genome duplication; localizes to the transitional and late Golgi	01_09_06	2E3	15_B_12	SWAT	punctate	ER,punctate	punctate	nucleus,cytosol	ER,punctate	Different	1	0	0	#N/A	0	None	143.409	57.0003	311.713	53.913	#N/A	#N/A	61.51	290.5	154	11572000000	77	168.61	17.2	0		0	0	0	0	0	1	0	Golgi:endosome:mitochondria	Golgi:endosome	Golgi	mitochondria	#N/A	4	#N/A	ENSG00000185236	01
YBR243C	ALG7	UDP-N-acetyl-glucosamine-1-P transferase; transfers Glc-Nac-P from UDP-GlcNac to Dol-P in the ER in the first step of the dolichol pathway of protein asparagine-linked glycosylation; inhibited by tunicamycin; human homolog DPAGT1 can complement yeast ALG7 mutant	01_09_07	1E4	15_F_06	SWAT	ER	ER	ER	missing	ER	New	1	0	6	0	10	29	113.11	30.5543	167.173	39.3646	#N/A	#N/A	#N/A	#N/A	17.2	#N/A	#N/A	72.72	11.3	Bearing Signal Sequence		0	0	0	0	0	0	0	endoplasmic reticulum	0	endoplasmic reticulum	0	inviable	#N/A	#N/A	ENSG00000172269	01
YNL130C	CPT1	Cholinephosphotransferase; required for phosphatidylcholine biosynthesis and for inositol-dependent regulation of EPT1 transcription; CPT1 has a paralog, EPT1, that arose from the whole genome duplication	01_09_08	2E4	10_D_01	SWAT	ER	ER,vacuole	ER	punctate	ER	New	1	0	0	#N/A	8	42	68.0548	49.7444	163.358	40.2705	#N/A	#N/A	30.42	#N/A	36.7	782800000	39	153.78	11.6	ActiveX VT_ERROR:	ActiveX VT_ERROR:	0	0	ActiveX VT_ERROR:	0	0	0	0	ActiveX VT_ERROR:	ActiveX VT_ERROR:	ActiveX VT_ERROR:	ActiveX VT_ERROR:	#N/A	#N/A	#N/A	ENSG00000138018	01
Control-Blank	None	#N/A	01_09_09	1E5	#N/A	SWAT	below threshold	missing	missing	#N/A	missing	#N/A	#N/A	0	#N/A	#N/A	#N/A	#N/A	#N/A	#N/A	#N/A	#N/A	#N/A	#N/A	#N/A	#N/A	#N/A	#N/A	#N/A	#N/A	#N/A	#N/A	#N/A	0	0	#N/A	0	0	0	0	#N/A	#N/A	#N/A	#N/A	#N/A	#N/A	#N/A	#N/A	01
Control-Blank	None	#N/A	01_09_10	2E5	#N/A	SWAT	below threshold	missing	missing	#N/A	missing	#N/A	#N/A	0	#N/A	#N/A	#N/A	#N/A	#N/A	#N/A	#N/A	#N/A	#N/A	#N/A	#N/A	#N/A	#N/A	#N/A	#N/A	#N/A	#N/A	#N/A	#N/A	0	0	#N/A	0	0	0	0	#N/A	#N/A	#N/A	#N/A	#N/A	#N/A	#N/A	#N/A	01
YBR254C	TRS20	Core component of transport protein particle (TRAPP) complexes I-III; TRAPPs are multimeric guanine nucleotide-exchange factors for GTPase Ypt1p, regulating ER-Golgi traffic (TRAPPI), intra-Golgi traffic (TRAPPII), endosome-Golgi traffic (TRAPPII and III) and autophagy (TRAPPIII); mutation leads to defects in endocytic recycling, block in sporulation/meiosis; mutations in human homolog TRAPPC2 ca…	01_09_11	1E6	14_D_09	SWAT	cytosol,punctate	cytosol,punctate	punctate	punctate	below threshold	Same	1	0	0	#N/A	0	None	66.086	23.4055	24.8095	28.266	#N/A	#N/A	22.64	#N/A	50.4	#N/A	#N/A	63.84	31.7	0		0	0	0	0	0	0	0	Golgi:autophagosome:endoplasmic reticulum	0	Golgi:autophagosome:endoplasmic reticulum	0	inviable	#N/A	#N/A	ENSG00000196459	01
YGL126W	SCS3	Protein required for inositol prototrophy; required for normal ER membrane biosynthesis; ortholog of the FIT family of proteins involved in triglyceride droplet biosynthesis and homologous to human FIT2; disputed role in the synthesis of inositol phospholipids from inositol	01_09_12	2E6	07_D_08	SWAT	ER	ER	ER	ER	#N/A	Same	1	0	0	#N/A	6	12	41.9879	26.5996	83.8251	#N/A	#N/A	#N/A	#N/A	99.5	10	#N/A	#N/A	62.81	13.6	0		0	0	0	0	0	0	0	endoplasmic reticulum	0	0	endoplasmic reticulum	#N/A	#N/A	12	0	01
YBL007C	SLA1	Cytoskeletal protein binding protein; required for assembly of the cortical actin cytoskeleton; interacts with proteins regulating actin dynamics and proteins required for endocytosis; found in the nucleus and cell cortex; has 3 SH3 domains	01_09_13	1E7	11_H_10	SWAT	punctate,bud neck	cytosol,punctate,bud neck	punctate,bud neck	cytosol,punctate	punctate,bud neck	Same	2	0	0	#N/A	0	None	168.632	42.4834	115.802	60.8797	#N/A	#N/A	87.07	665	55.1	16662000000	41	192.07	#N/A	0		0	0	0	0	0	0	0	actin:cell periphery:cytoplasm:cytoskeleton:endosome:nucleus	actin:cell periphery:nucleus	actin:cell periphery:cytoplasm:cytoskeleton:endosome:nucleus	0	#N/A	#N/A	#N/A	0	01
YER039C	HVG1	Protein of unknown function; HVG1 has a paralog, VRG4, that arose from the whole genome duplication	01_09_14	2E7	07_G_07	SWAT	ER	ER	below threshold	below threshold	below threshold	New	1	0	0	#N/A	7	12	26.1052	16.7435	11.464	23.3257	#N/A	#N/A	14.08	#N/A	0	#N/A	#N/A	5.14	21.4	0		0	0	0	0	0	0	0	Golgi:endoplasmic reticulum	0	Golgi:endoplasmic reticulum	0	#N/A	#N/A	#N/A	0	01
YBR255C-A	YBR255C-A	Putative protein of unknown function; may interact with respiratory chain complexes III (ubiquinol-cytochrome c reductase) or IV (cytochrome c oxidase); identified by sequence comparison with hemiascomycetous yeast species	01_09_15	1E8	12_C_08	SWAT	below threshold	missing	below threshold	missing	#N/A	0	0	0	0	#N/A	1	22	19.9232	17.7744	5.44331	24.985	#N/A	#N/A	#N/A	#N/A	28.9	33347000	#N/A	#N/A	30	0		0	0	0	0	0	0	0	cellular_component:integral component of membrane:membrane	0	0	0	#N/A	#N/A	#N/A	0	01
YGL137W	SEC27	Essential beta'-coat protein of the COPI coatomer; involved in ER-to-Golgi and Golgi-to-ER transport; contains WD40 domains that mediate cargo selective interactions; 45% sequence identity to mammalian beta'-COP	01_09_16	2E8	11_F_10	SWAT	punctate	punctate	missing	punctate,punctate	cytosol	Same	1	0	0	#N/A	0	None	135.255	0	172.152	59.7601	#N/A	#N/A	136.74	995.6	108.4	10544000000	53	328.61	11.5	0		0	0	0	0	0	0	0	COPI vesicle:Golgi:cytoplasm	COPI vesicle	COPI vesicle:Golgi:cytoplasm	0	inviable	#N/A	#N/A	ENSG00000184432	01
YBL010C	YBL010C	Putative protein of unknown function; green fluorescent protein (GFP)-fusion protein colocalizes with clathrin-coated vesicles	01_09_17	1E9	16_E_04	SWAT	punctate	cytosol,punctate	punctate	punctate	below threshold	Same	1	0	0	#N/A	0	None	59.7839	28.5142	28.6393	28.2548	#N/A	#N/A	20.95	#N/A	18.2	18272000	111	22.15	11.1	0		0	0	0	0	0	0	0	endosome:nucleus	0	nucleus	endosome	#N/A	#N/A	#N/A	0	01
YER039C-A	YER039C-A	Putative protein of unknown function; YER039C-A is not an essential gene	01_09_18	2E9	12_A_07	SWAT	below threshold	below threshold	below threshold	below threshold	#N/A	0	0	0	0	#N/A	2	20	15.4153	15.5148	5.55876	23.296	#N/A	#N/A	18.36	#N/A	9.6	#N/A	#N/A	#N/A	12.8	0		0	0	0	0	0	0	0	integral component of membrane:membrane	0	0	0	#N/A	#N/A	#N/A	0	01
YBR255W	MTC4	Protein of unknown function; required for normal growth rate at 15 degrees C; green fluorescent protein (GFP)-fusion protein localizes to the cytoplasm in a punctate pattern; mtc4 is synthetically sick with cdc13-1	01_09_19	1E10	09_D_02	SWAT	punctate	punctate	below threshold	punctate	punctate	Same	1	0	0	#N/A	2	652	41.8072	19.3062	40.3904	29.7152	#N/A	#N/A	17.22	#N/A	3.9	175270000	3	19.5	7.6	0		0	0	0	0	0	0	0	cytoplasm	0	cytoplasm	cytoplasm	#N/A	#N/A	#N/A	0	01
YGL140C	YGL140C	Putative protein of unknown function; non-essential gene; contains multiple predicted transmembrane domains	01_09_20	2E10	04_F_03	SWAT	cell periphery,ER	ER	ambiguous,ER	cytosol	below threshold	Different	1	0	0	#N/A	11	36	59.8476	22.2697	67.7091	27.1134	#N/A	#N/A	25.64	#N/A	5	73149000	22	77.03	8.4	0		0	0	KxKxx	0	0	0	0	integral component of membrane:membrane	0	0	0	#N/A	#N/A	#N/A	0	01
YBL011W	SCT1	Glycerol 3-phosphate/dihydroxyacetone phosphate sn-1 acyltransferase; dual substrate-specific acyltransferase of the glycerolipid biosynthesis pathway; prefers 16-carbon fatty acids; similar to Gpt2p; gene is constitutively transcribed	01_09_21	1E11	08_A_01	SWAT	ER	ER	ambiguous,ER	ER	ER,punctate	Same	1	0	0	#N/A	3	436	78.3859	20.9899	90.1998	36.4732	#N/A	#N/A	34.97	128.8	9.7	1032400000	205	86.24	9.4	0		0	0	0	0	0	0	0	endoplasmic reticulum	endoplasmic reticulum	endoplasmic reticulum	endoplasmic reticulum	#N/A	#N/A	#N/A	0	01
YER044C	ERG28	Endoplasmic reticulum membrane protein; may facilitate protein-protein interactions between the Erg26p dehydrogenase and the Erg27p 3-ketoreductase and/or tether these enzymes to the ER, also interacts with Erg6p	01_09_22	2E11	03_B_12	SWAT	ER	ER	ER	ER	below threshold	Same	1	0	0	#N/A	3	26	84.7651	30.3007	194.263	24.2057	#N/A	#N/A	18.55	#N/A	56.4	689470000	3	90.12	#N/A	0		0	0	0	0	0	0	0	endoplasmic reticulum	endoplasmic reticulum	endoplasmic reticulum	0	#N/A	#N/A	#N/A	ENSG00000133935	01
YBR264C	YPT10	Rab family GTP-binding protein; contains the PEST signal sequence specific for proteolytic enzymes; may be involved in vesicular transport; overexpression leads to accumulation of Golgi-like cisternae with budding vesicles	01_09_23	1E12	15_B_08	SWAT	vacuole membrane	ER,vacuole	ambiguous,vacuole membrane	cytosol	cytosol,punctate	Different	1	0	0	#N/A	0	None	102.265	32.3098	194.677	39.5569	#N/A	#N/A	18.2	#N/A	27.6	337210000	57	50.95	10.5	0		0	0	0	0	0	1	0	cell periphery:cytoplasm	0	cell periphery	cytoplasm	#N/A	#N/A	#N/A	ENSG00000069974	01
YGL142C	GPI10	Integral membrane protein involved in GPI anchor synthesis; putative alpha 1,2 mannosyltransferase required for addition of the third mannose onto the glycosylphosphatidylinositol (GPI) core structure; human PIG-Bp is a functional homolog	01_09_24	2E12	06_C_09	SWAT	ER	ER	below threshold	below threshold	ER	New	1	0	0	#N/A	11	17	63.2924	14.7098	88.3308	31.454	#N/A	#N/A	15.89	#N/A	8.7	#N/A	26	39.95	9.9	0		0	0	0	0	0	0	0	endoplasmic reticulum	0	endoplasmic reticulum	0	inviable	#N/A	#N/A	ENSG00000069943	01
YBL020W	RFT1	Membrane protein required for translocation of Man5GlcNac2-PP-Dol; required for translocation of Man5GlcNac2-PP-Dol from the cytoplasmic side to the lumenal side of the ER membrane but is not the flippase; mutation is suppressed by expression of human p53 protein; essential gene	01_09_25	1E13	05_F_04	SWAT	ER,punctate	ER,vacuole	punctate	missing	ER,punctate	New	2	0	0	#N/A	12	21	69.5628	28.1705	121.229	33.116	#N/A	#N/A	#N/A	#N/A	12.4	#N/A	#N/A	53.16	12.6	0		0	0	0	0	0	0	0	endoplasmic reticulum	endoplasmic reticulum	endoplasmic reticulum	0	inviable	#N/A	#N/A	ENSG00000272305	01
YER053C-A	YER053C-A	Protein of unknown function; green fluorescent protein (GFP)-fusion protein localizes to the endoplasmic reticulum; protein abundance increases in response to DNA replication stress	01_09_26	2E13	08_B_11	SWAT	vacuole	below threshold	below threshold	ER	#N/A	Different	2	0	0	#N/A	1	6	18.3577	16.8947	5.47404	23.582	#N/A	#N/A	81.36	755.7	22.6	#N/A	300	#N/A	#N/A	0		0	0	0	0	0	0	0	endoplasmic reticulum	0	endoplasmic reticulum	endoplasmic reticulum	#N/A	#N/A	#N/A	0	01
YBR265W	TSC10	3-ketosphinganine reductase; catalyzes the second step in phytosphingosine synthesis; essential for growth in the absence of exogenous dihydrosphingosine or phytosphingosine; localized to lipid droplets; member of short chain dehydrogenase/reductase protein family	01_09_27	1E14	08_F_12	SWAT	ER,punctate	ER,punctate	ambiguous,ER	ER	below threshold	Same	2	0	0	#N/A	1	285	75.7911	25.9133	99.3913	27.2404	#N/A	#N/A	25.73	#N/A	48.8	255280000	206	72.44	12.6	Lipid droplet		0	0	KKxx	0	0	0	0	cytoplasm:endoplasmic reticulum:lipid particle:mitochondria	lipid particle	endoplasmic reticulum	cytoplasm:endoplasmic reticulum:mitochondria	inviable	#N/A	#N/A	0	01
YGL145W	TIP20	Peripheral membrane protein required for COPI vesicle fusion to the ER; mediates Sey1p-independent homotypic ER fusion; prohibits back-fusion of COPII vesicles with the ER; forms a tethering complex with Sec39p and Dsl1p that interacts with ER SNAREs Sec20p and Use1p	01_09_28	2E14	12_G_07	SWAT	cytosol	cytosol	ambiguous,ER	ER	cytosol	Different	1	0	0	#N/A	0	None	95.8201	27.974	87.4276	39.5519	#N/A	#N/A	24.21	79.8	8.8	516160000	40	33.28	6.9	0		0	0	0	0	0	0	0	endoplasmic reticulum	endoplasmic reticulum	endoplasmic reticulum	0	inviable	#N/A	#N/A	0	01
YBL037W	APL3	Alpha-adaptin; large subunit of the clathrin associated protein complex (AP-2); involved in vesicle mediated transport	01_09_29	1E15	28_A_10	SWAT	punctate,bud neck	punctate,bud neck	bud neck	bud neck,cell periphery	below threshold	Same	2	0	0	#N/A	0	None	60.1415	26.4632	32.4077	28.769	#N/A	#N/A	NA	76	7.9	576180000	47	36.83	7.7	0		0	0	0	0	0	0	0	bud neck/tip:cell periphery:endosome	bud neck/tip	cell periphery:endosome	0	#N/A	#N/A	#N/A	ENSG00000196961	01
YER056C	FCY2	Purine-cytosine permease; mediates purine (adenine, guanine, and hypoxanthine) and cytosine accumulation; relative distribution to the vacuole increases upon DNA replication stress	01_09_30	2E15	03_H_10	SWAT	cell periphery	cell periphery,vacuole	cell periphery	vacuole	cell periphery	Different	1	0	0	#N/A	13	95	85.7847	102.326	133.723	37.7736	#N/A	#N/A	17.22	2590.5	141	1160900000	30	211.91	#N/A	0		0	0	0	0	0	0	0	cell periphery:vacuolar membrane	cell periphery	0	cell periphery:vacuolar membrane	#N/A	#N/A	#N/A	0	01
YBR273C	UBX7	UBX (ubiquitin regulatory X) domain-containing protein; interacts with Cdc48p; UBX7 has a paralog, UBX6, that arose from the whole genome duplication	01_09_31	1E16	12_D_07	SWAT	ER,punctate	ER,punctate	ER	ER	below threshold	Same	2	0	0	#N/A	0	None	98.4314	30.0642	130.173	25.3853	#N/A	#N/A	#N/A	#N/A	39.3	688750000	47	53.96	9.2	0		0	0	0	0	0	0	0	endoplasmic reticulum:nuclear membrane	nuclear membrane	endoplasmic reticulum	endoplasmic reticulum	#N/A	2	#N/A	0	01
YGL146C	RRT6	Putative protein of unknown function; non-essential gene identified in a screen for mutants with increased levels of rDNA transcription; contains two putative transmembrane spans, but no significant homology to other known proteins	01_09_32	2E16	10_E_08	SWAT	below threshold	below threshold	below threshold	below threshold	#N/A	0	0	0	0	#N/A	2	34	14.477	17.3487	5.67079	22.3708	#N/A	#N/A	16.56	#N/A	0.9	#N/A	#N/A	6.65	8.2	0		0	0	KxKxx	0	0	0	0	integral component of membrane:membrane	0	0	0	#N/A	#N/A	#N/A	0	01
YBL039W-B	YBL039W-B	Putative protein of unknown function; mCherry fusion protein localizes to the vacuole	01_09_33	1E17	09_C_09	SWAT	punctate	ER,vacuole	below threshold	missing	below threshold	New	1	0	0	#N/A	1	23	56.0697	20.2135	88.2366	25.1658	#N/A	#N/A	#N/A	#N/A	28.9	#N/A	#N/A	#N/A	115.6	0		0	0	0	0	0	0	0	cellular_component	0	0	0	#N/A	#N/A	#N/A	0	01
YER060W	FCY21	Putative purine-cytosine permease; very similar to Fcy2p but cannot substitute for its function	01_09_34	2E17	06_C_07	SWAT	cell periphery	cell periphery,vacuole	below threshold	below threshold	cell periphery,punctate	New	2	0	0	#N/A	10	84	82.3591	18.406	117.371	42.0997	#N/A	#N/A	16.78	#N/A	5.3	52757000	#N/A	29.92	6.4	0		0	0	0	0	0	0	0	cell periphery	cell periphery	0	0	inviable	1	#N/A	0	01
YBR283C	SSH1	Subunit of the Ssh1 translocon complex; Sec61p homolog involved in co-translational pathway of protein translocation; not essential	01_09_35	1E18	06_E_08	SWAT	ER	ER	ER	ER	ER	Same	1	0	0	#N/A	10	33	207.321	45.1144	243.876	46.8449	#N/A	#N/A	84.73	947.5	116.3	595480000	#N/A	323.91	15.3	0		0	0	0	0	0	0	0	endoplasmic reticulum	0	endoplasmic reticulum	0	#N/A	4	#N/A	0	01
YGL153W	PEX14	Central component of the peroxisomal importomer complex; peroxisomal protein import machinery docking complex component; interacts with both PTS1 (Pex5p) and PTS2 (Pex7p) peroxisomal matrix protein signal recognition factors and membrane receptor Pex13p	01_09_36	2E18	03_B_01	SWAT	punctate	punctate	punctate	punctate	punctate	Same	1	0	0	#N/A	0	None	93.8751	23.0342	146.367	27.1955	#N/A	#N/A	29.14	114	28.9	4060300000	66	35.5	14.6	Peroxisome	0	0	0	0	0	0	0	0	peroxisome	peroxisome	peroxisome	0	#N/A	#N/A	#N/A	ENSG00000142655	01
YBL041W	PRE7	Beta 6 subunit of the 20S proteasome	01_09_37	1E19	10_B_02	SWAT	cytosol,nucleus	cytosol,nucleus	missing	missing	cytosol	New	2	0	0	#N/A	0	None	144.4	0	239.716	51.4641	#N/A	#N/A	#N/A	#N/A	178	3791300000	#N/A	287.94	14.5	0		0	0	0	0	0	0	0	cytoplasm:endoplasmic reticulum:nucleus	endoplasmic reticulum:nucleus	cytoplasm:nucleus	0	inviable	#N/A	#N/A	ENSG00000008018	01
YER060W-A	FCY22	Putative purine-cytosine permease; very similar to Fcy2p but cannot substitute for its function	01_09_38	2E19	04_B_11	SWAT	cell periphery,vacuole	cell periphery,vacuole	below threshold	missing	cell periphery,punctate	New	2	0	0	#N/A	12	89	57.4567	12.6691	111.231	33.668	#N/A	#N/A	#N/A	#N/A	0	#N/A	#N/A	#N/A	7.4	0		0	0	0	0	0	0	0	cell periphery	cell periphery	0	0	#N/A	#N/A	78	0	01
Control-Blank	None	#N/A	01_09_39	1E20	#N/A	SWAT	below threshold	missing	missing	#N/A	missing	#N/A	#N/A	0	#N/A	#N/A	#N/A	#N/A	#N/A	0	#N/A	#N/A	#N/A	#N/A	#N/A	#N/A	#N/A	#N/A	#N/A	#N/A	#N/A	#N/A	#N/A	0	0	#N/A	0	0	0	0	#N/A	#N/A	#N/A	#N/A	#N/A	#N/A	#N/A	#N/A	01
Control-Blank	None	#N/A	01_09_40	2E20	#N/A	SWAT	below threshold	missing	missing	#N/A	missing	#N/A	#N/A	0	#N/A	#N/A	#N/A	#N/A	#N/A	#N/A	54.0285	#N/A	#N/A	#N/A	#N/A	#N/A	#N/A	#N/A	#N/A	#N/A	#N/A	#N/A	#N/A	0	0	#N/A	0	0	0	0	#N/A	#N/A	#N/A	#N/A	#N/A	#N/A	#N/A	#N/A	01
YBL042C	FUI1	High affinity uridine permease, localizes to the plasma membrane; also mediates low but significant transport of the cytotoxic nucleoside analog 5-fluorouridine; not involved in uracil transport; relative distribution to the vacuole increases upon DNA replication stress	01_09_41	1E21	06_A_05	SWAT	cell periphery,vacuole	cell periphery,bud neck	cell periphery	cell periphery,bud	below threshold	Same	2	0	0	#N/A	12	133	43.7615	38.6034	51.5953	28.1393	#N/A	#N/A	55.68	461	20.6	1177800000	300	79.94	8.2	0		0	0	0	0	0	0	0	cell periphery	cell periphery	0	cell periphery	#N/A	2.5	#N/A	0	01
YER072W	VTC1	Regulatory subunit of the vacuolar transporter chaperone (VTC) complex; VTC complex is involved in membrane trafficking, vacuolar polyphosphate accumulation, microautophagy and non-autophagic vacuolar fusion; also has mRNA binding activity; protein abundance increases in response to DNA replication stress	01_09_42	2E21	04_H_04	SWAT	vacuole membrane	ER,vacuole membrane	vacuole membrane	ER	vacuole membrane	Different	1	0	0	#N/A	3	33	193.027	65.7424	359.45	37.113	#N/A	#N/A	43.05	184	1561.3	252160000	#N/A	1371.9	17.4	0		0	0	0	0	0	0	0	endoplasmic reticulum:vacuolar membrane:vacuole	endoplasmic reticulum:vacuolar membrane	vacuolar membrane:vacuole	0	#N/A	#N/A	#N/A	0	01
YBR287W	YBR287W	Protein of unknown function; green fluorescent protein (GFP)-fusion protein localizes to the ER; YBR287W is not an essential gene	01_09_43	1E22	07_G_05	SWAT	ER	ER	ER	ER	below threshold	Same	1	0	0	#N/A	8	12	77.7118	26.3466	73.0656	25.2832	#N/A	#N/A	28.82	#N/A	32.3	#N/A	29	100.62	11.4	0		0	0	0	0	0	0	0	endoplasmic reticulum	0	0	endoplasmic reticulum	#N/A	#N/A	#N/A	0	01
YGL160W	AIM14	NADPH oxidase localized to the perinuclear ER; produces superoxide from NADPH; overexpression causes MCA1 dependent apoptosis; likely involved in superoxide-mediated regulation of the actin cytoskeleton; member of a conserved superfamily of NADPH oxidases (NOX enzymes); has similarity to iron/copper reductases (FRE1-8), particularly Fre8p	01_09_44	2E22	04_B_01	SWAT	ER	ER	below threshold	cytosol	below threshold	Different	1	0	0	#N/A	7	23	44.9764	19.6581	35.7737	23.7974	#N/A	#N/A	20.18	#N/A	10.7	203110000	95	40.84	8.5	0		0	0	0	0	0	0	0	endoplasmic reticulum	endoplasmic reticulum	0	0	#N/A	1.5	#N/A	0	01
YBL047C	EDE1	Scaffold protein involved in the formation of early endocytic sites; putative regulator of cytokinesis; homo-oligomerization is required for localization to and organization of endocytic sites; has a network of interactions with other endocytic proteins; binds membranes in a ubiquitin-dependent manner; may also bind ubiquitinated membrane-associated proteins; interacts with Cmk2 and functions ups…	01_09_45	1E23	14_D_08	SWAT	punctate,bud neck	punctate	punctate,bud neck	punctate	punctate	Same	2	0	0	#N/A	0	None	174.11	59.0879	150.133	46.6111	#N/A	#N/A	NA	1017.5	48.3	24347000000	74	170.63	#N/A	0		0	0	0	0	0	0	0	actin:bud neck/tip:cytoplasm	actin:bud neck/tip	cytoplasm	0	#N/A	#N/A	#N/A	ENSG00000110047	01
YOR165W	SEY1	Dynamin-like GTPase that mediates homotypic ER fusion; has a role in ER morphology; interacts physically and genetically with Yop1p and Rtn1p; functional ortholog of the human atlastin ATL1, defects in which cause a form of the human disease hereditary spastic paraplegia; homolog of Arabidopsis RHD3	01_09_46	2E23	08_A_06	SWAT	cytosol,ER,bud	cell periphery,punctate,bud	ER,punctate,bud	punctate	punctate	New	3	0	0	#N/A	2	682	122.54	34.7702	161.659	45.0877	#N/A	#N/A	48.93	#N/A	41.6	6675300000	135	111.75	8.2	ActiveX VT_ERROR:	ActiveX VT_ERROR:	0	0	ActiveX VT_ERROR:	0	0	0	0	ActiveX VT_ERROR:	ActiveX VT_ERROR:	ActiveX VT_ERROR:	ActiveX VT_ERROR:	#N/A	#N/A	#N/A	0	01
YBR288C	APM3	Mu3-like subunit of the clathrin associated protein complex (AP-3); functions in transport of alkaline phosphatase to the vacuole via the alternate pathway	01_09_47	1E24	13_E_12	SWAT	punctate	cytosol,punctate	punctate	punctate,punctate	cytosol	Same	1	0	0	#N/A	0	None	53.3633	29.1351	63.4419	30.6741	#N/A	#N/A	30.67	#N/A	25.2	196280000	79	64.6	14.3	0		0	0	0	0	0	0	0	Golgi:endosome	0	Golgi:endosome	0	#N/A	#N/A	#N/A	0	01
YGL161C	YIP5	Protein that interacts with Rab GTPases; localized to late Golgi vesicles; computational analysis of large-scale protein-protein interaction data suggests a possible role in vesicle-mediated transport	01_09_48	2E24	04_E_02	SWAT	punctate	vacuole	punctate	cytosol	cell periphery,punctate	Different	1	0	0	#N/A	4	183	75.3148	45.7818	101.813	31.3457	#N/A	#N/A	21.24	#N/A	28.2	106650000	9	87.32	13.2	0		0	0	0	0	0	0	0	Golgi	Golgi	0	0	#N/A	#N/A	#N/A	0	01
YJL219W	HXT9	Putative hexose transporter that is nearly identical to Hxt11p; has similarity to major facilitator superfamily (MFS) transporters, expression of HXT9 is regulated by transcription factors Pdr1p and Pdr3p	01_10_01	3E1	06_D_03	SWAT	cell periphery,ER	cell periphery,vacuole	below threshold	below threshold	nucleus	New	2	0	0	#N/A	11	61	99.2723	18.2371	158.953	31.0446	#N/A	#N/A	14.55	#N/A	0.2	#N/A	#N/A	#N/A	#N/A	0		0	0	0	0	0	0	0	cell periphery	cell periphery	0	0	#N/A	1.5	14	ENSG00000160326	01
YNL046W	YNL046W	Putative protein of unknown function; expression depends on Swi5p; GFP-fusion protein localizes to the endoplasmic reticulum; deletion confers sensitivity to 4-(N-(S-glutathionylacetyl)amino) phenylarsenoxide (GSAO)	01_10_02	4E1	10_E_07	SWAT	punctate,nucleus	punctate	below threshold	ER	#N/A	Different	2	0	0	#N/A	2	99	64.09	22.9662	66.4358	0	#N/A	#N/A	18.5	0	13.9	#N/A	29	52.65	17.3	0		0	0	0	0	0	0	0	endoplasmic reticulum	0	endoplasmic reticulum	endoplasmic reticulum	#N/A	3.5	#N/A	0	01
YKR007W	MEH1	Component of the EGO and GSE complexes; EGO is involved in the regulation of microautophagy and GSE is required for proper sorting of amino acid permease Gap1p; loss results in a defect in vacuolar acidification	01_10_03	3E2	02_E_05	SWAT	cytosol	cytosol	cytosol	vacuole membrane	cytosol	Different	1	0	0	#N/A	0	None	46.2168	21.1001	37.6497	30.2461	#N/A	#N/A	#N/A	189.5	44.3	1149700000	88	60.18	22.4	Palmitoylation		0	0	0	1	0	0	0	endosome:vacuolar membrane:vacuole	endosome:vacuolar membrane	endosome:vacuolar membrane:vacuole	vacuolar membrane	#N/A	#N/A	#N/A	0	01
YNR061C	YNR061C	Protein of unknown function; relocalizes from vacuole to cytoplasm upon DNA replication stress	01_10_04	4E2	07_C_12	SWAT	vacuole	vacuole	vacuole	vacuole	#N/A	Same	1	0	0	#N/A	4	16	62.5708	22.0536	140.523	#N/A	#N/A	#N/A	20.41	#N/A	91.7	#N/A	7	103.82	18.9	0		0	0	0	0	0	0	0	cytoplasm:vacuolar membrane:vacuole	vacuole	vacuolar membrane:vacuole	cytoplasm:vacuolar membrane:vacuole	#N/A	#N/A	#N/A	0	01
YOL026c	MIM1	Mitochondrial protein required for outer membrane protein import; cooperates with Tom70p to import the subset of proteins with multiple alpha-helical transmembrane segments, including Ugo1p, Tom20p, and others; present in a complex with Mim2p in the outer membrane that may create a local environment to facilitate membrane insertion of substrate proteins; also has a role in assembly of Tom20p into…	01_10_05	3E3	29_C_5	SWAT	mitochondria	mitochondria	mitochondria	missing	mitochondria	New	1	0	0	#N/A	1	35	97.5192	24.7292	71.4661	32.286	8.73383	6.03655	#N/A	#N/A	91.7	#N/A	#N/A	118.46	20.7	Mitochondria outer membrane		0	0	0	0	0	0	0	0	0	0	0	inviable	#N/A	#N/A	0	01
YNL047C	SLM2	Phosphoinositide PI4,5P(2) binding protein, forms a complex with Slm1p; acts downstream of Mss4p in a pathway regulating actin cytoskeleton organization in response to stress; TORC2 complex substrate and effector; SLM2 has a paralog, SLM1, that arose from the whole genome duplication	01_10_06	4E3	09_G_04	SWAT	cell periphery,punctate	cell periphery,punctate	below threshold	missing	punctate	New	2	0	0	#N/A	0	None	48.8658	19.6049	27.311	28.0656	#N/A	#N/A	#N/A	#N/A	4.9	28634000	49	23.86	4.3	0		0	0	0	0	0	0	0	cell periphery	cell periphery	cell periphery	0	#N/A	2.5	#N/A	0	01
YKR009C	FOX2	3-hydroxyacyl-CoA dehydrogenase and enoyl-CoA hydratase; multifunctional enzyme of the peroxisomal fatty acid beta-oxidation pathway; mutation is functionally complemented by human HSD17B4	01_10_07	3E4	03_A_02	SWAT	punctate	punctate	punctate	missing	punctate	New	1	0	0	#N/A	0	None	97.1165	15.9841	127.848	25.9918	#N/A	#N/A	#N/A	#N/A	1.5	#N/A	#N/A	5.47	14.7	Peroxisome	predicted PTS1 (by Peroxisome DB)	0	0	0	0	0	0	1	peroxisome	peroxisome	peroxisome	0	#N/A	#N/A	#N/A	ENSG00000133835	01
YNR062C	YNR062C	Putative membrane protein of unknown function	01_10_08	4E4	07_A_01	SWAT	ER	ER	below threshold	below threshold	below threshold	New	1	0	0	#N/A	8	16	72.7081	16.2174	45.7901	28.7038	#N/A	#N/A	14.02	#N/A	0	#N/A	#N/A	1.51	#N/A	0		0	0	KKxx	0	0	0	0	integral component of membrane:membrane	0	0	0	#N/A	#N/A	#N/A	0	01
Control-Blank	None	#N/A	01_10_09	3E5	#N/A	SWAT	below threshold	missing	missing	#N/A	missing	#N/A	#N/A	0	#N/A	#N/A	#N/A	#N/A	#N/A	#N/A	#N/A	#N/A	#N/A	#N/A	#N/A	#N/A	#N/A	#N/A	#N/A	#N/A	#N/A	#N/A	#N/A	0	0	#N/A	0	0	0	0	#N/A	#N/A	#N/A	#N/A	#N/A	#N/A	#N/A	#N/A	01
Control-Blank	None	#N/A	01_10_10	4E5	#N/A	SWAT	below threshold	missing	missing	#N/A	missing	#N/A	#N/A	0	#N/A	#N/A	#N/A	#N/A	#N/A	#N/A	#N/A	#N/A	#N/A	#N/A	#N/A	#N/A	#N/A	#N/A	#N/A	#N/A	#N/A	#N/A	#N/A	0	0	#N/A	0	0	0	0	#N/A	#N/A	#N/A	#N/A	#N/A	#N/A	#N/A	#N/A	01
YKR014C	YPT52	Endosomal Rab family GTPase; required for vacuolar protein sorting, endocytosis and multivesicular body (MVB) biogenesis and sorting; required for localization of the CORVET complex to endosomes; involved in autophagy and ionic stress tolerance; similar to Vps21p and Ypt53p; mammalian Rab5 homolog; protein abundance increases in response to DNA replication stress	01_10_11	3E6	15_C_12	SWAT	punctate,vacuole membrane	punctate	vacuole membrane	nucleus,cytosol	punctate	Different	2	0	0	#N/A	0	None	106.21	48.9741	269.3	53.8312	#N/A	#N/A	67.8	503.5	129.8	10289000000	773	121.98	9.1	0		0	0	0	0	0	1	0	cell periphery:endoplasmic reticulum:endosome	endosome	cell periphery:endoplasmic reticulum	0	#N/A	#N/A	#N/A	ENSG00000069974	01
YNR065C	YNR065C	Protein of unknown function; protein-protein interactions suggest a possible role in actin patch formation; YNR065C is not an essential gene	01_10_12	4E6	13_B_09	SWAT	ER	ER,vacuole	mitochondria	below threshold	#N/A	New	1	0	0	#N/A	1	938	81.2721	20.4479	24.6358	0	#N/A	#N/A	16.53	#N/A	0.1	#N/A	#N/A	#N/A	5.6	0		0	0	0	0	0	0	0	integral component of membrane:membrane	0	0	0	#N/A	#N/A	#N/A	ENSG00000108018	01
YJR001W	AVT1	Vacuolar transporter; imports large neutral amino acids into the vacuole; member of a family of seven S. cerevisiae genes (AVT1-7) related to vesicular GABA-glycine transporters	01_10_13	3E7	06_B_06	SWAT	vacuole membrane	vacuole membrane	below threshold	below threshold	vacuole membrane	New	1	0	0	#N/A	11	213	55.1872	29.0394	44.1346	39.332	#N/A	#N/A	18.51	#N/A	24.8	#N/A	25	101.94	12.1	0		0	0	0	0	0	0	0	vacuolar membrane:vacuole	vacuolar membrane:vacuole	vacuolar membrane:vacuole	0	#N/A	#N/A	#N/A	ENSG00000101438	01
YNL048W	ALG11	Alpha-1,2-mannosyltransferase; catalyzes sequential addition of the two terminal alpha 1,2-mannose residues to the Man5GlcNAc2-PP-dolichol intermediate during asparagine-linked glycosylation in the ER	01_10_14	4E7	12_C_01	SWAT	punctate	punctate	punctate	ER	below threshold	Different	1	0	0	#N/A	1	22	106.572	33.1194	118.879	25.5671	#N/A	#N/A	#N/A	#N/A	12.5	358750000	152	51.91	14.8	0		0	0	0	0	0	0	0	endoplasmic reticulum	endoplasmic reticulum	endoplasmic reticulum	0	#N/A	#N/A	#N/A	ENSG00000253710	01
YKR020W	VPS51	Component of the GARP (Golgi-associated retrograde protein) complex; GARP is required for the recycling of proteins from endosomes to the late Golgi, and for mitosis after DNA damage induced checkpoint arrest; links the (VFT/GARP) complex to the SNARE Tlg1p; members of the GARP complex are Vps51p-Vps52p-Vps53p-Vps54p	01_10_15	3E8	10_D_10	SWAT	cytosol,punctate	cytosol,punctate	punctate	punctate	below threshold	Same	2	0	0	#N/A	0	None	68.6872	21.345	51.0103	34.4157	#N/A	#N/A	20.25	90.8	73.2	551940000	#N/A	29.41	27.2	0		0	0	0	0	0	0	0	Golgi:endosome	Golgi	Golgi:endosome	0	#N/A	#N/A	#N/A	0	01
YNR070W	PDR18	Putative transporter of the ATP-binding cassette (ABC) family; role in plasma membrane sterol incorporation; implicated in pleiotropic drug resistance; provides resistance to ethanol stress and contributes to a decreased intracellular accumulation of ethanol; the authentic, non-tagged protein is detected in highly purified mitochondria in high-throughput studies	01_10_16	4E8	06_E_09	SWAT	ambiguous	below threshold	below threshold	below threshold	#N/A	New	1	0	0	#N/A	12	394	35.9134	13.5689	4.84576	23.45	#N/A	#N/A	15.67	#N/A	0	#N/A	#N/A	1.4	10	0		0	0	0	0	0	0	0	cell periphery:mitochondria	cell periphery	0	mitochondria	#N/A	#N/A	#N/A	0	01
YJR005W	APL1	Beta-adaptin; large subunit of the clathrin associated protein complex (AP-2); involved in vesicle mediated transport; similar to mammalian beta-chain of the clathrin associated protein complex	01_10_17	3E9	12_H_02	SWAT	punctate,bud neck,nucleus	bud neck,nucleus	bud neck	bud neck,cell periphery	below threshold	Same	3	0	0	#N/A	0	None	29.0374	26.5278	12.5349	24.9547	#N/A	#N/A	NA	122	9.1	224400000	34	49.92	7.3	0		0	0	0	0	0	0	0	cell periphery:endosome	0	cell periphery:endosome	0	#N/A	#N/A	#N/A	0	01
YNL049C	SFB2	Component of the Sec23p-Sfb2p heterodimer of the COPII vesicle coat; required for cargo selection during vesicle formation in ER to Golgi transport; homologous to Sfb3p; SFB2 has a paralog, SEC24, that arose from the whole genome duplication	01_10_18	4E9	13_F_10	SWAT	punctate	punctate	below threshold	ER to punctate	cytosol,punctate	Same	1	0	0	#N/A	0	None	92.2873	20.4155	91.9644	51.214	#N/A	#N/A	#N/A	119.5	13.3	1754600000	#N/A	57.19	9.7	0		0	0	0	0	0	0	0	COPII vesicle:Golgi:cytoplasm:endoplasmic reticulum	COPII vesicle	COPII vesicle:Golgi:cytoplasm:endoplasmic reticulum	0	#N/A	#N/A	#N/A	ENSG00000138802	01
YKR021W	ALY1	Alpha arrestin, substrate of calcineurin; controls nutrient-mediated intracellular sorting of permease Gap1p; interacts with AP-1 subunit Apl4p; dephosphorylation of Aly1p required for the endocytosis of Dip5p; may regulate endocytosis of plasma membrane proteins by recruiting ubiquitin ligase Rsp5p to plasma membrane targets; ALY1 has a paralog, ALY2, that arose from the whole genome duplication	01_10_19	3E10	28_B_12	SWAT	cytosol	cytosol	below threshold	cytosol	cytosol,punctate	Same	1	0	0	#N/A	0	None	52.4506	19.451	55.8939	39.7762	#N/A	#N/A	22.77	#N/A	2.9	60387000	#N/A	23.72	4	0		0	0	0	0	0	0	0	cytoplasm:endosome	endosome	cytoplasm	cytoplasm	#N/A	#N/A	#N/A	0	01
YNR072W	HXT17	Putative transmembrane polyol transporter; supports growth on and uptake of mannitol and sorbitol with moderate affinity when overexpressed in a strain deleted for hexose family members; minor hexose transport activity when overexpressed in a similar strain; induced by raffinose and galactose at pH 7.7 versus pH 4.7, repressed by high levels of glucose; HXT17 has a paralog, HXT13, that arose from…	01_10_20	4E10	05_E_07	SWAT	cell periphery,vacuole	cell periphery,vacuole	below threshold	below threshold	below threshold	New	2	0	0	#N/A	12	51	48.138	17.7989	39.2237	25.341	#N/A	#N/A	17.03	#N/A	0	#N/A	#N/A	#N/A	#N/A	0		0	0	0	0	0	0	0	cell periphery	cell periphery	0	0	#N/A	3	#N/A	ENSG00000160326	01
YJR009C	TDH2	Glyceraldehyde-3-phosphate dehydrogenase (GAPDH), isozyme 2; involved in glycolysis and gluconeogenesis; tetramer that catalyzes reaction of glyceraldehyde-3-phosphate to 1,3 bis-phosphoglycerate; detected in cytoplasm and cell wall; protein abundance increases in response to DNA replication stress; GAPDH-derived antimicrobial peptides are active against a wide variety of wine-related yeasts and …	01_10_21	3E11	16_C_02	SWAT	cytosol,nucleus	cytosol,nucleus	cytosol,nucleus	nucleus,cytosol	cytosol,nucleus	Same	2	0	0	#N/A	0	None	270.301	611.257	325.747	84.9421	#N/A	#N/A	1973.61	12722	2258.5	104000000000	#N/A	#N/A	#N/A	0		0	0	0	0	0	0	0	cell periphery:cytoplasm:lipid particle:mitochondria	cell periphery:cytoplasm:lipid particle:mitochondria	cytoplasm	cell periphery:cytoplasm	#N/A	#N/A	#N/A	ENSG00000105679	01
YNL051W	COG5	Component of the conserved oligomeric Golgi complex; a cytosolic tethering complex (Cog1p through Cog8p) that functions in protein trafficking to mediate fusion of transport vesicles to Golgi compartments	01_10_22	4E11	11_D_06	SWAT	cytosol	cytosol	punctate	punctate,punctate	cytosol	Different	1	0	0	#N/A	0	None	65.7325	30.5337	59.9839	30.3823	#N/A	#N/A	17.38	#N/A	19.9	534880000	28	31.14	12.9	0		0	0	0	0	0	0	0	Golgi	Golgi	Golgi	0	#N/A	#N/A	#N/A	0	01
YKR022C	NTR2	Essential protein that forms a dimer with Ntr1p; also forms a trimer, with Ntr2p and the DExD/H-box RNA helicase Prp43p, that is involved in spliceosome disassembly	01_10_23	3E12	09_B_04	SWAT	cytosol	cytosol	below threshold	ER,nucleus,cytosol	cytosol	Same	1	0	0	#N/A	0	None	79.5743	21.3611	56.2738	39.3271	#N/A	#N/A	20.31	#N/A	12.9	86269000	#N/A	32.86	11.9	0		0	0	0	0	0	0	0	cytoplasm:endoplasmic reticulum:nucleus	0	cytoplasm:nucleus	cytoplasm:endoplasmic reticulum:nucleus	inviable	#N/A	#N/A	0	01
YNR075W	COS10	Endosomal protein involved in turnover of plasma membrane proteins; member of the DUP380 subfamily of conserved, often subtelomeric COS genes; required for the multivesicular vesicle body sorting pathway that internalizes plasma membrane proteins for degradation; Cos proteins provide ubiquitin in trans for nonubiquitinated cargo proteins	01_10_24	4E12	12_E_10	SWAT	vacuole membrane	vacuole	below threshold	ER	below threshold	Different	1	0	0	#N/A	2	37	45.6228	16.6863	44.417	26.0108	#N/A	#N/A	15.82	#N/A	4.8	#N/A	548	20.66	11.3	0		0	0	0	0	0	0	0	cytoplasm:endoplasmic reticulum:nuclear membrane	0	0	cytoplasm:endoplasmic reticulum:nuclear membrane	#N/A	#N/A	#N/A	0	01
YJR010C-A	SPC1	Subunit of the signal peptidase complex (SPC); SPC cleaves the signal sequence from proteins targeted to the endoplasmic reticulum (ER); homolog of the SPC12 subunit of mammalian signal peptidase complex; protein abundance increases in response to DNA replication stress	01_10_25	3E13	08_C_08	SWAT	ER	ER	ER	ER	below threshold	Same	1	0	0	#N/A	2	30	49.842	32.3115	17.729	27.35	#N/A	#N/A	34.78	#N/A	130.8	481950000	135	#N/A	35.8	0		0	0	0	0	0	0	0	endoplasmic reticulum	0	endoplasmic reticulum	0	#N/A	#N/A	#N/A	0	01
YNL054W	VAC7	Integral vacuolar membrane protein; involved in vacuole inheritance and morphology; activates Fab1p kinase activity under basal conditions and also after hyperosmotic shock	01_10_26	4E13	11_H_09	SWAT	vacuole membrane	punctate,vacuole membrane	vacuole membrane	below threshold	punctate	New	1	0	0	#N/A	1	920	52.9029	21.8441	57.2967	47.3614	#N/A	#N/A	14.82	#N/A	5	134440000	#N/A	32.06	5.6	0		0	0	0	0	0	0	0	autophagosome:cytoplasm:vacuolar membrane:vacuole	autophagosome:vacuolar membrane	vacuolar membrane:vacuole	cytoplasm	#N/A	#N/A	#N/A	0	01
YKR026C	GCN3	Alpha subunit of translation initiation factor eIF2B; guanine-nucleotide exchange factor for eIF2; activity subsequently regulated by phosphorylated eIF2; positive regulator of GCN4 expression; assembles into filaments with Gcd2p, Gcd6p, Gcd7p, and Sui2p as cells approach stationary phase and under cytosolic acidification and starvation conditions; human homolog EIF2B1 can complement yeast null m…	01_10_27	3E14	15_D_11	SWAT	cytosol	cytosol	cytosol	cytosol	cytosol	Same	1	0	0	#N/A	0	None	95.2229	60.3042	183.659	47.7294	#N/A	#N/A	41.04	147.5	72.3	529380000	300	98.27	11.6	0		0	0	0	0	0	0	0	eukaryotic translation initiation factor 2B complex:guanyl-nucleotide exchange factor complex	0	0	0	#N/A	#N/A	#N/A	ENSG00000111361	01
YOL002C	IZH2	Plasma membrane receptor for plant antifungal osmotin; involved in zinc ion homeostasis, apoptosis; negatively regulates ZRT1 and other functionally divergent genes through CCCTC promoter motif (IzRE); modulates FET3 activity in iron-independent manner; affects gene expression by influencing balance of competition between Msn2p/Msn4p and Nrg1p/Nrg2p for binding to IzRE; transcription regulated by…	01_10_28	4E14	07_G_04	SWAT	ER,punctate	cell periphery,vacuole	below threshold	below threshold	cytosol	New	1	0	0	#N/A	7	81	69.3179	30.0669	77.4743	30.0147	#N/A	#N/A	14.13	#N/A	31.5	10889000	#N/A	66.6	30.7	0		0	0	0	0	0	0	0	cell periphery	cell periphery	0	0	#N/A	#N/A	#N/A	ENSG00000163291	01
YJR013W	GPI14	Glycosylphosphatidylinositol-alpha 1,4 mannosyltransferase I; involved in GPI anchor biosynthesis, requires Pbn1p for function; homolog of mammalian PIG-M	01_10_29	3E15	06_C_11	SWAT	ER	ER	ER	ER	ER,punctate	Same	1	0	0	#N/A	10	7	70.9362	27.9731	108.842	32.66	#N/A	#N/A	29.57	88	22.4	4271300	38	45.55	13.8	0		0	0	KKxx	0	0	0	0	endoplasmic reticulum	endoplasmic reticulum	endoplasmic reticulum	0	inviable	#N/A	#N/A	ENSG00000143315	01
YNL065W	AQR1	Plasma membrane transporter of the major facilitator superfamily; member of the 12-spanner drug:H(+) antiporter DHA1 family; confers resistance to short-chain monocarboxylic acids and quinidine; involved in the excretion of excess amino acids; AQR1 has a paralog, QDR1, that arose from the whole genome duplication; relocalizes from plasma membrane to cytoplasm upon DNA replication stress	01_10_30	4E15	06_C_05	SWAT	cell periphery,punctate	cell periphery,vacuole	punctate	cell periphery,vacuole	below threshold	Same	2	0	0	#N/A	12	100	31.1438	21.1521	25.0122	25.216	#N/A	#N/A	34.65	#N/A	6.7	133230000	#N/A	20.91	4	0		0	0	0	0	0	0	0	cell periphery:cytoplasm	cell periphery	0	cell periphery:cytoplasm	#N/A	2	#N/A	0	01
YKR027W	BCH2	Member of the ChAPs (Chs5p-Arf1p-binding proteins) family; part of the exomer complex with Chs5p to mediate export of specific cargo proteins, including Chs3p, from the Golgi to the plasma membrane; BCH2 has a paralog, CHS6, that arose from the whole genome duplication	01_10_31	3E16	12_E_04	SWAT	punctate	cytosol,punctate	punctate	punctate	cytosol	Same	1	0	0	#N/A	0	None	54.1222	24.4565	56.7963	32.3324	#N/A	#N/A	18.78	#N/A	4.3	1685000	20	27.92	8.2	0		0	0	0	0	0	0	0	Golgi:endosome:mitochondria	Golgi	Golgi	endosome:mitochondria	#N/A	#N/A	#N/A	0	01
YOL003C	PFA4	Palmitoyltransferase with autoacylation activity; required for palmitoylation of amino acid permeases containing a C-terminal Phe-Trp-Cys site; required for modification of Chs3p; member of the DHHC family of putative palmitoyltransferases	01_10_32	4E16	10_B_09	SWAT	ER	ER,vacuole	below threshold	below threshold	below threshold	New	1	0	0	#N/A	4	6	50.2566	18.4599	62.7536	29.936	#N/A	#N/A	14.41	#N/A	11.1	#N/A	#N/A	35.67	18.2	0		0	0	0	0	0	0	0	endoplasmic reticulum	endoplasmic reticulum	endoplasmic reticulum	0	#N/A	#N/A	#N/A	ENSG00000153786	01
YJR015W	YJR015W	Putative protein of unknown function; localizes to endoplasmic reticulum and cytoplasm; predicted to encode a membrane transporter based on phylogenetic analysis; not an essential gene; YJR015W has a paralog, SNG1, that arose from the whole genome duplication	01_10_33	3E17	07_E_06	SWAT	ER	ER	below threshold	ER,cytosol	below threshold	Same	1	0	0	#N/A	6	86	58.3694	17.9185	25.2899	28.6832	#N/A	#N/A	18.88	#N/A	48.4	33113000	13	130.08	11.1	0		0	0	0	0	0	0	0	cytoplasm:endoplasmic reticulum	0	endoplasmic reticulum	cytoplasm:endoplasmic reticulum	#N/A	#N/A	#N/A	0	01
YNL074C	MLF3	Serine-rich protein of unknown function; predicted to be palmitoylated; overproduction suppresses growth inhibition caused by exposure to immunosuppressant leflunomide; MLF3 has a paralog, VHS2, that arose from the whole genome duplication	01_10_34	4E17	02_F_04	SWAT	cytosol	cytosol	below threshold	cytosol	cytosol	Same	1	0	0	#N/A	0	None	79.4658	21.3809	65.4223	39.6197	#N/A	#N/A	22.07	98.5	29.7	80813000	#N/A	51.83	5.3	Palmitoylation		0	0	0	1	0	0	0	cytoplasm	0	cytoplasm	cytoplasm	#N/A	3	#N/A	0	01
YKR030W	GMH1	Golgi membrane protein of unknown function; interacts with Gea1p and Gea2p; required for localization of Gea2p; computational analysis suggests a possible role in either cell wall synthesis or protein-vacuolar targeting	01_10_35	3E18	07_E_10	SWAT	punctate	ER,punctate	punctate	below threshold	punctate	New	1	0	0	#N/A	5	92	73.4936	35.7964	116.253	38.3864	#N/A	#N/A	16.38	#N/A	24.6	#N/A	#N/A	45.97	15.9	0		0	0	0	0	0	0	0	Golgi:endoplasmic reticulum	Golgi	Golgi:endoplasmic reticulum	0	#N/A	2	#N/A	ENSG00000115446	01
YOL014W	YOL014W	Putative protein of unknown function; mCherry fusion protein localizes to the cytosol and nucleus	01_10_36	4E18	01_H_05	SWAT	cytosol	cytosol	mitochondria	missing	#N/A	New	2	0	0	#N/A	0	None	68.8121	19.8384	4.38018	0	#N/A	#N/A	#N/A	#N/A	3.1	#N/A	#N/A	25.8	6.6	Farnesylation		0	0	0	0	1	0	0	cellular_component	0	0	0	#N/A	#N/A	#N/A	0	01
YJR019C	TES1	Peroxisomal acyl-CoA thioesterase; likely to be involved in fatty acid oxidation rather than fatty acid synthesis; conserved protein also found in human peroxisomes; TES1 mRNA levels increase during growth on fatty acids	01_10_37	3E19	02_F_11	SWAT	punctate	punctate	punctate	mitochondria	punctate	Different	1	0	0	#N/A	0	None	59.0677	30.2753	83.7994	26.6381	#N/A	#N/A	24.09	#N/A	10.8	493500000	#N/A	16.22	9.9	Peroxisome	predicted PTS1 (by Peroxisome DB)	0	0	0	0	0	0	1	mitochondria:peroxisome	peroxisome	peroxisome	mitochondria	#N/A	4	#N/A	ENSG00000101473	01
YNL080C	EOS1	Protein involved in N-glycosylation; deletion mutation confers sensitivity to exidative stress and shows synthetic lethality with mutations in the spindle checkpoint genes BUB3 and MAD1; YNL080C is not an essential gene	01_10_38	4E19	08_F_02	SWAT	ER	ER	punctate	below threshold	below threshold	New	1	0	0	#N/A	4	136	51.9597	23.7042	63.7088	27.8782	#N/A	#N/A	16.5	#N/A	8.7	12430000	9	66.16	7.1	0		0	0	0	0	0	0	0	endoplasmic reticulum	endoplasmic reticulum	endoplasmic reticulum	0	#N/A	#N/A	#N/A	0	01
Control-Blank	None	#N/A	01_10_39	3E20	#N/A	SWAT	below threshold	missing	missing	#N/A	missing	#N/A	#N/A	0	#N/A	#N/A	#N/A	#N/A	#N/A	#N/A	0	#N/A	#N/A	#N/A	#N/A	#N/A	#N/A	#N/A	#N/A	#N/A	#N/A	#N/A	#N/A	0	0	#N/A	0	0	0	0	#N/A	#N/A	#N/A	#N/A	#N/A	#N/A	#N/A	#N/A	01
Control-Blank	None	#N/A	01_10_40	4E20	#N/A	SWAT	below threshold	missing	missing	#N/A	missing	#N/A	#N/A	0	#N/A	#N/A	#N/A	#N/A	#N/A	0	#N/A	#N/A	#N/A	#N/A	#N/A	#N/A	#N/A	#N/A	#N/A	#N/A	#N/A	#N/A	#N/A	0	0	#N/A	0	0	0	0	#N/A	#N/A	#N/A	#N/A	#N/A	#N/A	#N/A	#N/A	01
YJR031C	GEA1	Guanine nucleotide exchange factor for ADP ribosylation factors (ARFs); involved in vesicular transport between the Golgi and ER, Golgi organization, and actin cytoskeleton organization; GEA1 has a paralog, GEA2, that arose from the whole genome duplication	01_10_41	3E21	04_E_06	SWAT	punctate	punctate	punctate	punctate	cytosol,punctate	Same	2	0	0	#N/A	2	389	67.9467	31.9962	66.1387	44.9186	#N/A	#N/A	29.87	#N/A	6.9	356700000	300	51.42	9.5	0		0	0	0	0	0	0	0	Golgi:cytoplasm	Golgi	cytoplasm	0	#N/A	#N/A	#N/A	ENSG00000107862	01
YNL084C	END3	EH domain-containing protein involved in endocytosis; actin cytoskeletal organization and cell wall morphogenesis; forms a complex with Sla1p and Pan1p	01_10_42	4E21	11_G_09	SWAT	cell periphery,punctate	cell periphery,punctate,bud neck	cell periphery,punctate,bud neck	punctate	punctate	Same	2	0	0	#N/A	0	None	91.7732	47.5578	43.5405	34.9845	#N/A	#N/A	51.68	263.5	94.1	3709500000	90	119.02	15.1	0		0	0	0	0	0	0	0	actin:cell periphery:cytoplasm:cytoskeleton:endosome	actin	actin:cell periphery:cytoplasm:cytoskeleton:endosome	0	#N/A	#N/A	#N/A	0	01
YKR036C	CAF4	WD40 repeat-containing protein associated with the CCR4-NOT complex; interacts in a Ccr4p-dependent manner with Ssn2p; also interacts with Fis1p, Mdv1p and Dnm1p and plays a role in mitochondrial fission; CAF4 has a paralog, MDV1, that arose from the whole genome duplication	01_10_43	3E22	11_C_12	SWAT	mitochondria	mitochondria	mitochondria	mitochondria	punctate,mitochondria	Same	1	0	0	#N/A	0	None	54.9462	31.7405	37.0868	29.2589	#N/A	#N/A	25.06	#N/A	2.3	156060000	34	34.52	9.6	0		0	0	0	0	0	0	0	mitochondria	mitochondria	mitochondria	mitochondria	#N/A	1.5	#N/A	ENSG00000114742	01
YOL018C	TLG2	Syntaxin-like t-SNARE; forms a complex with Tlg1p and Vti1p and mediates fusion of endosome-derived vesicles with the late Golgi; required along with VPS45 for an early step of the constitutive CVT pathway; interactions with Vps45 prevents Tlg2p degradation, and facilitates t-SNARE complex formation; homologous to mammalian SNARE protein syntaxin 16 (Sx16)	01_10_44	4E22	02_C_01	SWAT	punctate	punctate,vacuole	punctate	missing	punctate	New	1	0	0	#N/A	1	318	75.0109	19.4886	88.6574	30.118	#N/A	#N/A	#N/A	#N/A	16.9	170670000	#N/A	30.99	7.7	Palmitoylation		0	0	0	1	0	0	0	Golgi:endosome	Golgi:endosome	Golgi:endosome	0	#N/A	#N/A	#N/A	ENSG00000254995	01
YJR040W	GEF1	Voltage-gated chloride channel; localized to the golgi, the endosomal system, and plasma membrane; involved in cation homeostasis; highly homologous to vertebrate voltage-gated chloride channels; modulates TBSV model (+) RNA virus replication by regulating copper metabolism	01_10_45	3E23	06_B_02	SWAT	punctate	punctate	below threshold	below threshold	punctate	New	1	0	0	#N/A	12	76	87.4835	22.4799	112.608	47.4956	#N/A	#N/A	16.09	#N/A	9.7	102760000	#N/A	53.19	10.2	0		0	0	0	0	0	0	0	Golgi:cell periphery:endoplasmic reticulum:endosome:vacuolar membrane:vacuole	Golgi:cell periphery:endoplasmic reticulum:endosome:vacuole	Golgi:cell periphery:endoplasmic reticulum:endosome:vacuolar membrane:vacuole	0	#N/A	#N/A	#N/A	ENSG00000114859	01
YNL087W	TCB2	ER protein involved in ER-plasma membrane tethering; one of 6 proteins (Ist2p, Scs2p, Scs22p, Tcb1p, Tcb2p, Tcb3p) that connect ER to plasma membrane (PM) and regulate PM phosphatidylinositol-4-phosphate (PI4P) levels by controlling access of Sac1p phosphatase to its substrate PI4P in the PM; contains 3 calcium and lipid binding domains; mRNA is targeted to bud; TCB2 has a paralog, TCB1, that aro…	01_10_46	4E23	08_G_12	SWAT	cell periphery,ER	cell periphery,ER,punctate	cell periphery,punctate	cell periphery	ER	Same	2	0	0	#N/A	1	104	117.795	37.6452	101.068	45.5455	#N/A	#N/A	41.87	206.5	24.4	3370900000	19	117.31	9.9	0		0	0	0	0	0	0	0	bud neck/tip:cell periphery:endoplasmic reticulum	bud neck/tip:endoplasmic reticulum	cell periphery	0	#N/A	#N/A	#N/A	0	01
YKR039W	GAP1	General amino acid permease; Gap1p senses the presence of amino acid substrates to regulate localization to the plasma membrane when needed; essential for invasive growth	01_10_47	3E24	02_G_01	SWAT	ER	ER,vacuole	below threshold	vacuole	punctate	Different	1	0	0	#N/A	12	95	77.5348	19.8097	68.3271	32.4636	#N/A	#N/A	15.58	819.5	3.6	418530000	#N/A	13.82	11.3	Palmitoylation		0	0	0	1	0	0	0	COPII vesicle:cell periphery:endosome:multivesicular body:vacuole	COPII vesicle:cell periphery:endosome:multivesicular body:vacuole	0	0	#N/A	3.5	27	0	01
YOL019W	YOL019W	Protein of unknown function; green fluorescent protein (GFP)-fusion protein localizes to the cell periphery and vacuole; YOL019W has a paralog, DCV1, that arose from the whole genome duplication	01_10_48	4E24	08_D_01	SWAT	cell periphery,punctate	cell periphery,vacuole	cell periphery,punctate,bud	cell periphery,vacuole	below threshold	Same	2	0	0	#N/A	4	6	51.4176	27.7781	78.61	26.4356	#N/A	#N/A	27.56	#N/A	16.7	206680000	73	51.45	7	0		0	0	0	0	0	0	0	cell periphery:vacuolar membrane:vacuole	cell periphery	cell periphery:vacuolar membrane:vacuole	vacuole	#N/A	3.5	#N/A	0	01
YDL135C	RDI1	Rho GDP dissociation inhibitor; involved in the localization and regulation of Cdc42p and Rho1p; protein abundance increases in response to DNA replication stress	01_11_01	1F1	11_C_10	SWAT	cytosol	cytosol	below threshold	nucleus,cytosol	cytosol	Same	1	0	0	#N/A	0	None	219.357	19.0148	354.805	69.9924	#N/A	#N/A	17.47	351.2	215.7	6004400000	300	159.09	28	0		0	0	0	0	0	0	0	bud neck/tip:cell periphery:cytoplasm	bud neck/tip:cytoplasm	cytoplasm	cell periphery	#N/A	#N/A	#N/A	ENSG00000242173	01
YGR224W	AZR1	Plasma membrane transporter of the major facilitator superfamily; involved in resistance to azole drugs such as ketoconazole and fluconazole	01_11_02	2F1	05_H_02	SWAT	cell periphery	cell periphery,vacuole	cell periphery	below threshold	cytosol	New	1	0	0	#N/A	13	64	77.0237	23.4541	113.583	35.38	#N/A	#N/A	17.89	#N/A	0	#N/A	#N/A	0.24	#N/A	0		0	0	0	0	0	0	0	cell periphery	cell periphery	cell periphery	0	#N/A	#N/A	#N/A	0	01
YDR275W	BSC2	Protein of unknown function; ORF exhibits genomic organization compatible with a translational readthrough-dependent mode of expression; null mutant displays increased translation rate and increased readthrough of premature stop codons; BSC2 has a paralog, IRC23, that arose from the whole genome duplication	01_11_03	1F2	01_B_09	SWAT	punctate	punctate	punctate	punctate	below threshold	Same	1	0	0	#N/A	1	66	31.3819	17.2821	9.70192	24.9247	#N/A	#N/A	24.73	#N/A	2.6	#N/A	73	41.68	15.7	Lipid droplet		0	0	0	0	0	0	0	lipid particle	0	lipid particle	lipid particle	#N/A	#N/A	#N/A	0	01
YIL041W	GVP36	BAR domain protein that localizes to early and late Golgi vesicles; required for adaptation to varying nutrient concentrations, fluid-phase endocytosis, polarization of the actin cytoskeleton, and vacuole biogenesis	01_11_04	2F2	10_C_12	SWAT	cytosol	cytosol	cytosol,punctate	cytosol	ER,punctate	Same	1	0	0	#N/A	0	None	295.106	20.6099	395.302	68.1469	#N/A	#N/A	15.47	691.5	273.4	35465000000	87	341.18	21	0		0	0	0	0	0	0	0	Golgi:cytoplasm	Golgi	Golgi	cytoplasm	#N/A	#N/A	#N/A	0	01
YDL137W	ARF2	ADP-ribosylation factor; GTPase of the Ras superfamily involved in regulation of coated formation vesicles in intracellular trafficking within the Golgi; ARF2 has a paralog, ARF1, that arose from the whole genome duplication; arf1 arf2 double null mutation is complemented by human ARF1, ARF4, ARF5, or ARF6	01_11_05	1F3	10_E_03	SWAT	cytosol	cytosol	cytosol	punctate,punctate	cytosol	Different	1	0	0	#N/A	0	None	316.655	145.178	509.258	83.9447	#N/A	#N/A	15.33	#N/A	351	5699900000	113	#N/A	51	0		0	0	0	0	0	1	0	Golgi	Golgi	Golgi	Golgi	#N/A	#N/A	#N/A	ENSG00000143761	01
YGR227W	DIE2	Dolichyl-phosphoglucose-dependent alpha-1,2-glucosyltransferase; located in the ER; functions in pathway that synthesizes the dolichol-linked oligosaccharide precursor for N-linked protein glycosylation; has a role in regulation of ITR1 and INO1; human homolog ALG10B can complement yeast die2 null mutant	01_11_06	2F3	06_A_02	SWAT	cell periphery,ER	ER	below threshold	below threshold	ER,punctate	New	2	0	0	#N/A	13	36	47.454	21.4198	70.5658	31.9109	#N/A	#N/A	16.09	#N/A	19.5	1790800	#N/A	42.56	5.5	0		0	0	0	0	0	0	0	endoplasmic reticulum	endoplasmic reticulum	endoplasmic reticulum	0	#N/A	#N/A	#N/A	ENSG00000175548	01
YDR276C	PMP3	Small plasma membrane protein; confers resistance to amphotericin B and is a potential target of this common antifungal drug; related to a family of plant polypeptides that are overexpressed under high salt concentration or low temperature; not essential for viability; deletion causes hyperpolarization of the plasma membrane potential	01_11_07	1F4	04_B_12	SWAT	cell periphery	missing	cell periphery	ambiguous	cell periphery	New	1	0	0	#N/A	2	6	250.077	249.375	#N/A	45.0971	#N/A	#N/A	#N/A	#N/A	1252.2	#N/A	77	670.21	22.4	0		0	0	0	0	0	0	0	cell periphery	cell periphery	cell periphery	0	#N/A	#N/A	#N/A	0	01
YIL043C	CBR1	Cytochrome b reductase; not essential for viability; also detected in mitochondria; mutation in conserved NADH binding domain of the human ortholog results in type I methemoglobinemia	01_11_08	2F4	04_G_04	SWAT	cytosol,nucleus	cytosol,nucleus	cytosol,nucleus	ER	missing	Different	1	0	0	#N/A	1	7	178.106	63.2068	138.434	24.3636	#N/A	#N/A	41.73	179.5	183.7	22633000000	#N/A	404.46	39	0		0	0	0	0	0	0	0	endoplasmic reticulum:mitochondria	0	endoplasmic reticulum:mitochondria	mitochondria	#N/A	#N/A	#N/A	ENSG00000159348	01
YDL138W	RGT2	Plasma membrane high glucose sensor that regulates glucose transport; low affinity sesnor that contains 12 predicted transmembrane segments and a long C-terminal tail required for hexose transporter induction; phosphorylation of the tail by Yck1p/Yck2p facilitates binding to the HXT co-repressors, Mth1p and Std1p; RGT2 has a paralog, SNF3, that arose from the whole genome duplication	01_11_09	1F5	03_H_11	SWAT	cell periphery	cell periphery,vacuole	below threshold	below threshold	below threshold	New	1	0	0	#N/A	12	97	31.0141	15.5353	38.4019	28.4526	#N/A	#N/A	18.37	#N/A	1.3	#N/A	3	17.35	8.1	0		0	0	0	0	0	0	0	cell periphery	cell periphery	0	0	#N/A	#N/A	#N/A	ENSG00000160326	01
YGR233C	PHO81	Cyclin-dependent kinase (CDK) inhibitor; regulates Pho80p-Pho85p and Pcl7p-Pho85p cyclin-CDK complexes in response to phosphate levels; inhibitory activity for Pho80p-Pho85p requires myo-D-inositol heptakisphosphate (IP7) generated by Vip1p; relative distribution to the nucleus increases upon DNA replication stress	01_11_10	2F5	09_A_08	SWAT	cytosol	cytosol,punctate	cytosol,nucleus	nucleus,cytosol	cytosol,punctate	Same	2	0	0	#N/A	0	None	65.9176	48.8081	62.5898	33.9106	#N/A	#N/A	21.98	#N/A	12.1	365220000	41	98.18	4.5	Lipid droplet		0	0	0	0	0	0	0	cytoplasm:nucleus	nucleus	cytoplasm:nucleus	cytoplasm:nucleus	#N/A	2.5	22	0	01
YDR281C	PHM6	Protein of unknown function; expression is regulated by phosphate levels	01_11_11	1F6	03_D_05	SWAT	vacuole	vacuole	vacuole	vacuole	below threshold	Same	1	0	0	#N/A	1	75	23.4629	20.2824	13.6938	24.984	#N/A	#N/A	#N/A	#N/A	98.6	#N/A	#N/A	65.78	4.4	Tail Anchored		1	0	0	0	0	0	0	vacuolar membrane:vacuole	0	vacuolar membrane:vacuole	vacuole	#N/A	#N/A	#N/A	0	01
YIL044C	AGE2	ADP-ribosylation factor (ARF) GTPase activating protein (GAP) effector; involved in Trans-Golgi-Network (TGN) transport; contains C2C2H2 cysteine/histidine motif	01_11_12	2F6	14_H_03	SWAT	cytosol,punctate	cytosol,punctate	punctate	punctate	cytosol,punctate	Same	2	0	0	#N/A	0	None	116.916	37.7377	145.716	47.5402	#N/A	#N/A	36.57	124.5	50.6	374920000	51	82.57	13.9	0		0	0	0	0	0	0	0	Golgi:cytoplasm:endosome	0	Golgi:cytoplasm	endosome	#N/A	#N/A	#N/A	ENSG00000184060	01
YDL142C	CRD1	Cardiolipin synthase; produces cardiolipin, which is a phospholipid of the mitochondrial inner membrane that is required for normal mitochondrial membrane potential and function and for correct integration of membrane-multispanning proteins into the mitochondrial outer membrane; required to maintain tubular mitochondrial morphology and functions in mitochondrial fusion; also required for normal v…	01_11_13	1F7	14_F_07	SWAT	mitochondria	ER	below threshold	mitochondria	below threshold	Same	1	0	0	#N/A	6	73	22.8204	17.3046	8.89989	24.4492	#N/A	#N/A	16	#N/A	12.4	#N/A	#N/A	21.91	16.5	0		0	0	0	0	0	0	0	mitochondria	0	mitochondria	mitochondria	#N/A	#N/A	#N/A	ENSG00000088766	01
YGR236C	SPG1	Protein required for high temperature survival during stationary phase; not required for growth on nonfermentable carbon sources; the authentic, non-tagged protein is detected in highly purified mitochondria in high-throughput studies	01_11_14	2F7	09_D_06	SWAT	ambiguous	ER	below threshold	below threshold	below threshold	New	2	0	0	#N/A	1	20	39.0367	17.498	18.8253	23.5927	#N/A	#N/A	17.55	#N/A	0	#N/A	#N/A	1.04	#N/A	0		0	0	0	0	0	0	0	mitochondria	0	mitochondria	mitochondria	#N/A	#N/A	#N/A	0	01
YDR284C	DPP1	Diacylglycerol pyrophosphate (DGPP) phosphatase; zinc-regulated vacuolar membrane-associated lipid phosphatase, dephosphorylates DGPP to phosphatidate (PA) and Pi, then PA to diacylglycerol; involved in lipid signaling and cell metabolism	01_11_15	1F8	07_A_11	SWAT	vacuole membrane	ER,vacuole	vacuole membrane	vacuole membrane	punctate,vacuole membrane	Same	1	0	0	#N/A	6	21	155.498	49.3513	230.471	32.5631	#N/A	#N/A	14.9	#N/A	40.1	#N/A	#N/A	69.99	39.2	0		0	0	0	0	0	0	0	vacuolar membrane:vacuole	vacuolar membrane	vacuolar membrane:vacuole	0	#N/A	#N/A	#N/A	ENSG00000147535	01
YIL046W-A	YIL046W-A	Putative protein of unknown function; identified by expression profiling and mass spectrometry	01_11_16	2F8	13_E_07	SWAT	below threshold	below threshold	below threshold	missing	below threshold	0	0	0	0	#N/A	1	17	17.8048	16.9049	7.31227	23.951	#N/A	#N/A	#N/A	#N/A	0	#N/A	#N/A	#N/A	21.4	0		0	0	0	0	0	0	0	cellular_component:integral component of membrane:membrane	0	0	0	#N/A	#N/A	#N/A	0	01
YDL145C	COP1	Alpha subunit of COPI vesicle coatomer complex; complex surrounds transport vesicles in the early secretory pathway	01_11_17	1F9	11_F_07	SWAT	punctate	punctate	punctate	punctate,punctate	punctate	Same	1	0	6	0	0	None	189.902	84.8841	90.6024	47.88	#N/A	#N/A	131.24	953.2	67.6	24669000000	92	347.74	10.3	0		0	0	0	0	0	0	0	COPI vesicle:Golgi:cytoplasm	COPI vesicle	COPI vesicle:Golgi:cytoplasm	0	inviable	2	#N/A	ENSG00000122218	01
YGR239C	PEX21	Peroxin required for peroxisomal matrix protein targeting; acts on proteins containing the PTS2 targeting sequence; interacts with Pex7p; constitutively expressed; partially redundant with Pex18p; required for import of the Gpd1p-Pnc1p heterodimer in which only Gpd1p has a peroxisomal targeting signal; relative distribution to cytoplasmic foci increases upon DNA replication stress	01_11_18	2F9	03_A_01	SWAT	cytosol,nucleus	cytosol	punctate	punctate	punctate	Different	2	0	0	#N/A	0	None	46.5601	32.8469	22.3292	28.3306	#N/A	#N/A	29.04	#N/A	10.7	#N/A	#N/A	17.09	22.9	Peroxisome	0	0	0	0	0	0	0	0	cytoplasm:peroxisome	cytoplasm:peroxisome	cytoplasm:peroxisome	cytoplasm	#N/A	#N/A	#N/A	0	01
YDR292C	SRP101	Signal recognition particle (SRP) receptor alpha subunit; contain GTPase domains; involved in SRP-dependent protein targeting; interacts with the beta subunit, Srp102p	01_11_19	1F10	11_H_03	SWAT	ER	cytosol,ER	ER	missing	cytosol	New	1	0	0	#N/A	0	None	98.6496	42.7243	145.27	40.874	#N/A	#N/A	#N/A	#N/A	37.9	5212800000	49	87.1	10.2	0		0	0	0	0	0	0	0	endoplasmic reticulum	endoplasmic reticulum	endoplasmic reticulum	0	inviable	#N/A	#N/A	ENSG00000182934	01
YIL047C	SYG1	Plasma membrane protein of unknown function; truncation and overexpression suppresses lethality of G-alpha protein deficiency	01_11_20	2F10	07_H_08	SWAT	vacuole membrane	vacuole membrane	below threshold	vacuole membrane	ambigous,punctate	Same	1	0	0	#N/A	8	400	69.9678	20.3299	70.4565	29.6105	#N/A	#N/A	33.32	145.3	9.3	213680000	22	110.32	9.1	0		0	0	0	0	0	0	0	cell periphery:mitochondria	cell periphery	cell periphery	mitochondria	#N/A	#N/A	#N/A	ENSG00000143324	01
YDL146W	LDB17	Protein involved in the regulation of endocytosis; transiently recruited to actin cortical patches in a SLA1-dependent manner after late coat component assembly; GFP-fusion protein localizes to the periphery, cytoplasm, bud, and bud neck	01_11_21	1F11	11_G_12	SWAT	punctate,bud neck	cytosol,punctate	below threshold	cytosol	cytosol	Same	2	0	0	#N/A	0	None	58.4531	13.8658	73.9904	37.4392	#N/A	#N/A	21.9	#N/A	3.3	15305000	3	27.97	14.5	0		0	0	0	0	0	0	0	actin:bud neck/tip:cytoplasm	actin	bud neck/tip:cytoplasm	bud neck/tip:cytoplasm	#N/A	#N/A	#N/A	0	01
YGR241C	YAP1802	Protein of the AP180 family, involved in clathrin cage assembly; binds Pan1p and clathrin; YAP1802 has a paralog, YAP1801, that arose from the whole genome duplication	01_11_22	2F11	09_H_03	SWAT	punctate,bud	cytosol,bud neck,nucleus	punctate,bud neck	ambiguous,neck,cell periphery,bud,bud neck	punctate,cytosol	Same	2	0	0	#N/A	0	None	65.8065	29.7211	64.6049	38.5446	#N/A	#N/A	#N/A	171	16	329510000	365	51.12	7.3	0		0	0	0	0	0	0	0	actin:bud neck/tip:cell periphery:cytoplasm:endosome	actin	bud neck/tip:cell periphery:cytoplasm:endosome	0	#N/A	#N/A	#N/A	ENSG00000065609	01
YDR294C	DPL1	Dihydrosphingosine phosphate lyase; regulates intracellular levels of sphingolipid long-chain base phosphates (LCBPs), degrades phosphorylated long chain bases, prefers C16 dihydrosphingosine-l-phosphate as a substrate	01_11_23	1F12	11_A_08	SWAT	punctate	punctate	below threshold	ER	below threshold	Different	1	0	0	#N/A	2	28	44.5841	23.6	34.9326	25.2892	#N/A	#N/A	44.06	247	25.9	5195600000	32	96.51	9.3	0		0	0	0	0	0	0	0	endoplasmic reticulum	endoplasmic reticulum	0	endoplasmic reticulum	#N/A	2.5	#N/A	ENSG00000166224	01
YIL048W	NEO1	Phospholipid translocase (flippase), role in phospholipid asymmetry of plasma membrane; involved in endocytosis, vacuolar biogenesis and Golgi to ER vesicle-mediated transport; localizes to endosomes and the Golgi apparatus	01_11_24	2F12	07_C_10	SWAT	punctate	punctate	punctate	punctate	punctate	Same	1	0	0	#N/A	10	196	57.1056	27.4641	76.314	40.5743	#N/A	#N/A	17.62	160.9	5.5	182310000	300	47.93	8.5	0		0	0	0	0	0	0	0	COPI vesicle:Golgi:endosome	Golgi:endosome	Golgi:endosome	COPI vesicle	inviable	#N/A	#N/A	ENSG00000054793	01
YDL149W	ATG9	Transmembrane protein involved in forming Cvt and autophagic vesicles; cycles between the phagophore assembly site (PAS) and other cytosolic punctate structures, not found in autophagosomes; may be involved in membrane delivery to the PAS	01_11_25	1F13	07_A_05	SWAT	punctate	punctate	below threshold	missing	punctate	New	1	0	0	#N/A	7	327	46.6433	22.0866	51.4089	34.2455	#N/A	#N/A	#N/A	#N/A	1.8	55319000	2	10.56	9.8	0		0	0	0	0	0	0	0	Golgi:autophagosome:endoplasmic reticulum:mitochondria	autophagosome:mitochondria	Golgi:autophagosome:endoplasmic reticulum	0	#N/A	#N/A	#N/A	ENSG00000198925	01
YGR247W	CPD1	Cyclic nucleotide phosphodiesterase; hydrolyzes ADP-ribose 1'', 2''-cyclic phosphate to ADP-ribose 1''-phosphate; may have a role in tRNA splicing; no detectable phenotype is conferred by null mutation or by overexpression; protein abundance increases in response to DNA replication stress	01_11_26	2F13	16_A_05	SWAT	punctate	cytosol,punctate	punctate	punctate	below threshold	Same	1	0	0	#N/A	0	None	90.354	28.4795	133.981	29.0774	#N/A	#N/A	28.4	63.5	11.3	#N/A	21	37.27	19.3	0		0	0	0	0	0	0	0	Golgi:endosome	0	Golgi	endosome	#N/A	#N/A	#N/A	0	01
YDR297W	SUR2	Sphinganine C4-hydroxylase; catalyses the conversion of sphinganine to phytosphingosine in sphingolipid biosyntheis	01_11_27	1F14	07_F_12	SWAT	ER	ER	ER	ER	#N/A	Same	1	0	0	#N/A	3	50	60.9144	35.4208	42.8779	#N/A	#N/A	#N/A	69.86	286.5	66.9	1164700000	300	140.03	16.9	0		0	0	KKxx	0	0	0	0	endoplasmic reticulum	endoplasmic reticulum	endoplasmic reticulum	0	#N/A	#N/A	#N/A	0	01
YIL049W	DFG10	Probable polyprenol reductase; catalyzes conversion of polyprenol to dolichol, the precursor for N-glycosylation; involved in filamentous growth; mutations in human homolog SRD5A3 confer CDG (Congenital Disorders of Glycosylation); human SRD5A3 can complement yeast null mutant	01_11_28	2F14	03_H_12	SWAT	vacuole	below threshold	below threshold	cytosol	#N/A	Different	1	0	0	#N/A	5	12	20.4267	18.2661	6.71035	22.9446	#N/A	#N/A	20.01	#N/A	13.9	#N/A	#N/A	27.04	6.6	0		0	0	0	0	0	0	0	cytoplasm:endoplasmic reticulum	0	cytoplasm:endoplasmic reticulum	0	#N/A	#N/A	#N/A	0	01
YDL161W	ENT1	Epsin-like protein involved in endocytosis and actin patch assembly; functionally redundant with Ent2p; binds clathrin via a clathrin-binding domain motif at C-terminus; relocalizes from bud neck to cytoplasm upon DNA replication stress; ENT1 has a paralog, ENT2, that arose from the whole genome duplication	01_11_29	1F15	12_G_03	SWAT	punctate,bud neck	punctate,bud neck	punctate,bud neck	punctate	cytosol,punctate	Same	2	0	0	#N/A	0	None	100.977	40.9073	107.131	45.5039	#N/A	#N/A	37.62	172.5	46.6	742410000	39	57.02	7.8	0		0	0	0	0	0	0	0	actin:bud neck/tip:cytoplasm	actin	cytoplasm	bud neck/tip:cytoplasm	#N/A	2	#N/A	0	01
YGR254W	ENO1	Enolase I, a phosphopyruvate hydratase; catalyzes conversion of 2-phosphoglycerate to phosphoenolpyruvate during glycolysis and the reverse reaction during gluconeogenesis; expression repressed in response to glucose; protein abundance increases in response to DNA replication stress; N-terminally propionylated in vivo; ENO1 has a paralog, ENO2, that arose from the whole genome duplication	01_11_30	2F15	16_F_02	SWAT	cytosol	cytosol	cytosol	cytosol	cytosol	Same	1	0	0	#N/A	0	None	432.329	697.498	397.264	76.1945	#N/A	#N/A	3267.78	8071.5	385.9	1040000000000	#N/A	#N/A	#N/A	0		0	0	0	0	0	0	0	cell periphery:cytoplasm:mitochondria:vacuole	mitochondria:vacuole	cytoplasm	cell periphery:cytoplasm	#N/A	#N/A	#N/A	ENSG00000188316	01
YDR302W	GPI11	ER membrane protein involved in a late step of GPI anchor assembly; involved in the addition of phosphoethanolamine to the multiply mannosylated glycosylphosphatidylinositol (GPI) intermediate; human PIG-Fp is a functional homolog	01_11_31	1F16	07_G_12	SWAT	ER	ER,vacuole	ER	ER	ER	Same	1	0	0	#N/A	6	48	73.4195	29.7787	128.152	33.6676	#N/A	#N/A	58.73	358.5	45.5	161170000	305	48.99	62.4	0		0	0	0	0	0	0	0	endoplasmic reticulum	endoplasmic reticulum	endoplasmic reticulum	0	inviable	#N/A	#N/A	0	01
YIL067C	YIL067C	Uncharacterized protein of unknown function	01_11_32	2F16	06_H_12	SWAT	punctate	punctate	punctate	vacuole	punctate	Different	1	0	0	#N/A	8	119	57.6079	21.5808	73.5281	39.9673	#N/A	#N/A	14.45	#N/A	5.8	115680000	#N/A	27	10.1	0		0	0	0	0	0	0	0	vacuolar membrane:vacuole	0	vacuolar membrane:vacuole	vacuole	#N/A	#N/A	#N/A	0	01
YDL180W	YDL180W	Putative protein of unknown function; green fluorescent protein (GFP)-fusion protein localizes to the vacuole	01_11_33	1F17	03_H_09	SWAT	vacuole membrane	vacuole membrane	vacuole membrane	vacuole	below threshold	Different	1	0	0	#N/A	7	21	48.7639	26.0269	69.7519	29.4446	#N/A	#N/A	15.64	#N/A	3.9	11095000	#N/A	25.1	5.6	0		0	0	0	0	0	0	0	vacuolar membrane:vacuole	0	vacuolar membrane:vacuole	vacuole	#N/A	#N/A	#N/A	0	01
YGR260W	TNA1	High affinity nicotinic acid plasma membrane permease; responsible for uptake of low levels of nicotinic acid; expression of the gene increases in the absence of extracellular nicotinic acid or para-aminobenzoate (PABA)	01_11_34	2F17	05_A_05	SWAT	cell periphery,vacuole	cell periphery,vacuole	vacuole	ER	punctate	Different	2	0	0	#N/A	12	84	90.9742	30.6192	145.541	28.3498	#N/A	#N/A	193.95	212	39.6	250180000	31	203.31	14.1	0		0	0	0	0	0	0	0	cell periphery:mitochondria	cell periphery	0	mitochondria	#N/A	#N/A	#N/A	0	01
YDR307W	PMT7	Putative protein mannosyltransferase similar to Pmt1p; has a potential role in protein O-glycosylation	01_11_35	1F18	07_G_09	SWAT	ER	ER	ER	ER	below threshold	Same	1	0	0	#N/A	9	29	60.3832	24.1759	74.7854	28.1342	#N/A	#N/A	29.22	127	9.6	#N/A	29	41.19	8.9	0		0	0	0	0	0	0	0	endoplasmic reticulum	0	endoplasmic reticulum	endoplasmic reticulum	#N/A	#N/A	#N/A	0	01
YIL068C	SEC6	Essential 88kDa subunit of the exocyst complex; the exocyst mediates polarized targeting and tethering of post-Golgi secretory vesicles to active sites of exocytosis at the plasma membrane prior to SNARE-mediated fusion; anchors the assembled complex to sites of secretion; interacts with SM-like protein and SNARE regulator Sec1p and may recruit it to sites of secretion; binds to SNARE complexes b…	01_11_36	2F18	13_D_01	SWAT	bud neck	cytosol,bud neck	punctate,bud neck	bud neck	bud neck	Same	1	0	0	#N/A	0	None	60.3366	26.4111	66.3745	28.5531	#N/A	#N/A	NA	68.5	7.3	187730000	28	47.93	9.1	0		0	0	0	0	0	0	0	bud neck/tip:cytoplasm:exocyst	bud neck/tip:exocyst	cytoplasm:exocyst	0	inviable	#N/A	#N/A	0	01
YDL185W	VMA1	Subunit A of the V1 peripheral membrane domain of V-ATPase; protein precursor undergoes self-catalyzed splicing to yield the extein Tfp1p and the intein Vde (PI-SceI), which is a site-specific endonuclease; the V1 peripheral membrane domain of the vacuolar H+-ATPase (V-ATPase) has eight subunits; involved in methionine restriction extension of chronological lifespan in an autophagy-dependent mann…	01_11_37	1F19	11_A_12	SWAT	vacuole membrane	missing	missing	vacuole membrane	#N/A	Same	1	0	0	#N/A	0	None	298.515	#N/A	#N/A	0	#N/A	#N/A	439.47	2731.1	348.6	244000000000	109	1078.54	#N/A	0		0	0	0	0	0	0	0	vacuolar membrane:vacuole	vacuolar membrane	vacuolar membrane:vacuole	0	#N/A	#N/A	#N/A	ENSG00000114573	01
YGR261C	APL6	Beta3-like subunit of the yeast AP-3 complex; functions in transport of alkaline phosphatase to the vacuole via the alternate pathway; exists in both cytosolic and peripherally associated membrane-bound pools	01_11_38	2F19	09_C_04	SWAT	cytosol,punctate	cytosol,punctate	punctate	punctate,punctate,punctate	cytosol	Same	2	0	0	#N/A	0	None	89.1206	33.2417	75.3712	28.926	#N/A	#N/A	37.49	194.4	15.5	1263300000	54	99.58	8.4	0		0	0	0	0	0	0	0	Golgi:endosome	0	Golgi:endosome	0	#N/A	#N/A	#N/A	ENSG00000103723	01
YDR319C	YFT2	Protein required for normal ER membrane biosynthesis; member of the highly conserved FIT family of proteins involved in triglyceride droplet biosynthesis and homologous to human FIT2; interacts with Sst2p and Hsp82p in high-throughput two-hybrid screens	01_11_39	1F20	09_C_05	SWAT	punctate	vacuole	below threshold	ambiguous	below threshold	New	1	0	0	#N/A	6	12	44.2401	23.8513	83.654	24.941	#N/A	#N/A	17.64	#N/A	5.7	#N/A	44	26.4	66.6	0		0	0	0	0	0	0	0	integral component of membrane:membrane	0	0	0	#N/A	#N/A	#N/A	0	01
YIL076W	SEC28	Epsilon-COP subunit of the coatomer; regulates retrograde Golgi-to-ER protein traffic; stabilizes Cop1p, the alpha-COP and the coatomer complex; non-essential for cell growth; protein abundance increases in response to DNA replication stress	01_11_40	2F20	13_A_07	SWAT	punctate	cytosol,punctate	punctate	punctate,punctate	cytosol,punctate	Same	1	0	0	#N/A	0	None	175.44	59.6029	121.9	49.6366	#N/A	#N/A	89.88	#N/A	171	7379800000	20	191.04	36.6	0		0	0	0	0	0	0	0	COPI vesicle:Golgi:cytoplasm:endosome	COPI vesicle:endosome	COPI vesicle:Golgi:cytoplasm	0	#N/A	#N/A	#N/A	0	01
YDL193W	NUS1	Forms dehydrodolichyl diphosphate syntase complex with RER2 or SRT1; tet-repressible mutant shows accumulation of hypoglycosylated forms of CPY, suggesting that Nus1p may be involved in protein trafficking; mutations in human homolog NUS1 have been implicated in congenital scoliosis, neurological impairment, refractory epilepsy, hearing deficit, and visual impairment; human cis-prenyltransferase …	01_11_41	1F21	01_E_09	SWAT	punctate	punctate	ER,punctate	ER	punctate	Different	1	0	0	#N/A	1	98	106.112	44.3651	149.41	48.4679	#N/A	#N/A	48.13	216	43.9	795430000	#N/A	77.56	12.4	Lipid droplet		0	0	0	0	0	0	0	endoplasmic reticulum:lipid particle:nuclear membrane:nucleus	endoplasmic reticulum:lipid particle	endoplasmic reticulum:lipid particle:nuclear membrane:nucleus	lipid particle:nuclear membrane	inviable	#N/A	#N/A	ENSG00000153989	01
YGR263C	SAY1	Sterol deacetylase; component of the sterol acetylation/deacetylation cycle along with Atf2p; active both in the endoplasmic reticulum (ER) and in lipid droplets; integral membrane protein with active site in the ER lumen; green fluorescent protein (GFP)-fusion protein localizes to the ER	01_11_42	2F21	12_C_03	SWAT	cell periphery,ER,punctate	cell periphery,ER,punctate	below threshold	ER	punctate	Same	3	0	0	#N/A	1	46	100.637	19.9736	166.405	43.1172	#N/A	#N/A	#N/A	#N/A	4.8	148930000	26	18.34	14.8	Lipid droplet		0	0	0	0	0	0	0	endoplasmic reticulum:lipid particle	endoplasmic reticulum:lipid particle	endoplasmic reticulum	endoplasmic reticulum	#N/A	#N/A	#N/A	0	01
YDR320C	SWA2	Auxilin-like protein involved in vesicular transport; clathrin-binding protein required for uncoating of clathrin-coated vesicles	01_11_43	1F22	10_F_12	SWAT	cytosol	cytosol	cytosol	ambiguous	cytosol	New	1	0	0	#N/A	0	None	115.972	29.3118	125.712	51.5182	#N/A	#N/A	30.25	103	16.1	1171900000	22	40.37	7.4	0		0	0	0	0	0	0	0	cytoplasm:endoplasmic reticulum	endoplasmic reticulum	cytoplasm:endoplasmic reticulum	0	#N/A	3	#N/A	0	01
YIL085C	KTR7	Putative mannosyltransferase involved in protein glycosylation; member of the KRE2/MNT1 mannosyltransferase family; KTR7 has a paralog, KTR5, that arose from the whole genome duplication	01_11_44	2F22	04_D_10	SWAT	ER,punctate	ER,vacuole	below threshold	missing	below threshold	New	2	0	0	#N/A	1	21	61.1226	21.1573	130.487	28.2269	#N/A	#N/A	#N/A	#N/A	11.8	26472000	55	#N/A	15.4	0		0	0	0	0	0	0	0	Golgi	Golgi	0	0	#N/A	#N/A	#N/A	0	01
YDL194W	SNF3	Plasma membrane low glucose sensor, regulates glucose transport; high affinity sensor that contains 12 predicted transmembrane segments and a long C-terminal tail required for induction of hexose transporters; also senses fructose and mannose; SNF3 has a paralog, RGT2, that arose from the whole genome duplication	01_11_45	1F23	05_E_10	SWAT	cell periphery	cell periphery,vacuole	below threshold	below threshold	below threshold	New	1	0	0	#N/A	12	94	32.7424	17.9449	41.2798	25.3209	#N/A	#N/A	13.69	#N/A	0.5	#N/A	#N/A	10.97	9.2	0		0	0	0	0	0	0	0	cell periphery	cell periphery	cell periphery	0	#N/A	#N/A	#N/A	ENSG00000160326	01
YGR270W	YTA7	Protein that localizes to chromatin; has a role in regulation of histone gene expression; has a bromodomain-like region that interacts with the N-terminal tail of histone H3, and an ATPase domain; relocalizes to the cytosol in response to hypoxia; potentially phosphorylated by Cdc28p	01_11_46	2F23	10_C_09	SWAT	nucleus	nucleus	cell periphery,nucleus	nucleus	punctate,nucleus	Same	1	0	0	#N/A	0	None	88.9293	36.7586	104.437	38.4052	#N/A	#N/A	28.44	#N/A	10.8	3960500000	893	84.26	7.8	0		0	0	0	0	0	0	0	cytoplasm:endoplasmic reticulum:nucleus	cytoplasm:endoplasmic reticulum:nucleus	0	nucleus	#N/A	#N/A	#N/A	ENSG00000156802	01
YDR323C	PEP7	Adaptor protein involved in vesicle-mediated vacuolar protein sorting; multivalent adaptor protein; facilitates vesicle-mediated vacuolar protein sorting by ensuring high-fidelity vesicle docking and fusion, which are essential for targeting of vesicles to the endosome; required for vacuole inheritance	01_11_47	1F24	13_C_02	SWAT	punctate	punctate	punctate	punctate	below threshold	Same	1	0	0	#N/A	0	None	50.333	25.6967	33.9577	28.7078	#N/A	#N/A	16.86	#N/A	2.6	#N/A	3	14.24	11	0		0	0	0	0	0	0	0	cytoplasm:endosome:nucleus:vacuolar membrane:vacuole	cytoplasm:endosome	vacuolar membrane:vacuole	cytoplasm:nucleus	inviable	#N/A	#N/A	0	01
YIL088C	AVT7	Putative transporter; member of a family of seven S. cerevisiae genes (AVT1-7) related to vesicular GABA-glycine transporters	01_11_48	2F24	06_H_04	SWAT	vacuole membrane	vacuole membrane	vacuole membrane	ER	below threshold	Different	1	0	0	#N/A	10	35	65.2649	22.0029	91.6231	27.8518	#N/A	#N/A	18.64	#N/A	16.9	379100000	#N/A	73.72	12.4	0		0	0	0	0	0	0	0	cell periphery:vacuolar membrane:vacuole	cell periphery:vacuole	vacuolar membrane:vacuole	0	#N/A	#N/A	#N/A	ENSG00000166558	01
YLR208W	SEC13	Structural component of 3 complexes; subunit of the Nup84p nuclear pore subcomplex that contributes to nucleocytoplasmic transport and NPC biogenesis; subunit of the COPII vesicle coat required for ER-to-Golgi transport; subunit of SEACAT, a subcomplex of the coatomer-related, vacuolar-associated SEA complex, that inhibits the TORC1 inhibitory role of SEACIT (Iml1p-Npr2p-Npr3p), a GAP for Gtr1p, …	01_12_01	3F1	11_G_07	SWAT	ER,punctate	ER,punctate	ER,punctate	ER to punctate	#N/A	Same	2	0	0	#N/A	0	None	212.415	85.2629	316.926	0	#N/A	#N/A	144.07	#N/A	206.6	11416000000	300	233.81	18.6	0		0	0	0	0	0	0	0	COPII vesicle:endoplasmic reticulum:nuclear membrane:nucleus:vacuolar membrane:vacuole	COPII vesicle:nuclear membrane	COPII vesicle:endoplasmic reticulum:nuclear membrane:nucleus:vacuolar membrane:vacuole	0	inviable	#N/A	#N/A	ENSG00000157020	01
YOR185C	GSP2	GTP binding protein (mammalian Ranp homolog); involved in the maintenance of nuclear organization, RNA processing and transport; interacts with Kap121p, Kap123p and Pdr6p (karyophilin betas); not required for viability; protein abundance increases in response to DNA replication stress; GSP2 has a paralog, GSP1, that arose from the whole genome duplication	01_12_02	4F1	16_H_03	SWAT	nucleus	nucleus	cytosol,nucleus	nucleus,cytosol	nucleus	Same	1	0	0	#N/A	0	None	378.952	14.5666	417.103	95.8101	#N/A	#N/A	29.26	151.5	28.3	318330000	#N/A	74.49	33.6	0		0	0	0	0	0	1	0	nucleus	nucleus	nucleus	0	#N/A	2	#N/A	ENSG00000132341	01
YML120C	NDI1	NADH:ubiquinone oxidoreductase; transfers electrons from NADH to ubiquinone in respiratory chain but does not pump protons, in contrast to higher eukaryotic multisubunit respiratory complex I; upon apoptotic stress, is activated in mitochondria by N-terminal cleavage, then translocates to cytoplasm to induce apoptosis; homolog of human AIFM2; yeast NDI1 complements several phenotypes of human cel…	01_12_03	3F2	14_C_11	SWAT	mitochondria	below threshold	below threshold	mitochondria	#N/A	Same	1	0	0	#N/A	1	466	23.483	17.4291	6.22992	#N/A	#N/A	#N/A	15.59	847.5	15.9	3193400000	43	41.35	8.1	0		0	0	0	0	0	0	0	mitochondria	mitochondria	mitochondria	mitochondria	#N/A	#N/A	#N/A	0	01
YPL191C	YPL191C	Protein of unknown function; diploid deletion strain exhibits high budding index; green fluorescent protein (GFP)-fusion protein localizes to the cytoplasm; YPL191C has a paralog, YGL082W, that arose from the whole genome duplication	01_12_04	4F2	01_F_04	SWAT	cytosol,ER	cytosol,ER,punctate	punctate	cytosol	#N/A	Different	2	0	0	#N/A	0	None	74.1247	20.9165	64.2017	0	#N/A	#N/A	23.89	#N/A	10	20462000	300	19.82	18.2	Farnesylation		0	0	0	0	1	0	0	cytoplasm	0	cytoplasm	cytoplasm	#N/A	#N/A	#N/A	ENSG00000128923	01
YLR212C	TUB4	Gamma-tubulin; involved in nucleating microtubules from both the cytoplasmic and nuclear faces of the spindle pole body; protein abundance increases in response to DNA replication stress	01_12_05	3F3	16_B_05	SWAT	punctate	punctate,nucleus	punctate	punctate	punctate	Same	1	0	0	#N/A	0	None	75.2866	33.9481	118.475	42.1154	#N/A	#N/A	32.29	#N/A	18.3	144800000	41	50.78	12.4	0		0	0	0	0	0	1	0	cytoplasm:cytoskeleton:microtubule:spindle pole body	0	cytoplasm:cytoskeleton:microtubule:spindle pole body	spindle pole body	inviable	#N/A	#N/A	ENSG00000131462	01
YOR186W	YOR186W	Putative protein of unknown function; proper regulation of expression during heat stress is sphingolipid-dependent; mCherry fusion protein localizes to the vacuole; YOR186W has a paralog, YLR297W, that arose from the whole genome duplication	01_12_06	4F3	10_C_03	SWAT	below threshold	vacuole	below threshold	below threshold	below threshold	0	0	0	0	#N/A	1	89	35.2019	18.8885	11.9259	23.6953	#N/A	#N/A	19.92	#N/A	0	#N/A	#N/A	1.37	17	0		0	0	0	0	0	0	0	cellular_component:integral component of membrane:membrane	0	0	0	#N/A	#N/A	#N/A	0	01
YML121W	GTR1	Subunit of a TORC1-stimulating GTPase complex; subunit of the heterodimeric Gtr1-Gtr2 GTPase complex that stimulates TORC1 in response to amino acid stimulation; tethered to the vacuolar membrane as part of the EGOC, a complex required for sorting of Gap1p and microautophagy; involved in phosphate transport and telomeric chromatin silencing; activated by the the Iml1p (GAP) subunit of the SEACIT …	01_12_07	3F4	16_D_05	SWAT	cytosol,vacuole membrane	cytosol	vacuole membrane	vacuole membrane	cytosol	Same	1	0	0	#N/A	0	None	85.1549	21.6253	140.18	39.8367	#N/A	#N/A	32.49	100.5	23.8	65074000	#N/A	54.93	12.9	0		0	0	0	0	0	1	0	cytoplasm:endosome:nucleus:vacuolar membrane:vacuole	cytoplasm:endosome:nucleus:vacuolar membrane	cytoplasm:nucleus:vacuolar membrane:vacuole	0	#N/A	#N/A	#N/A	ENSG00000155876	01
YPL192C	PRM3	Protein required for nuclear envelope fusion during karyogamy; pheromone-regulated; peripheral protein of the nuclear membrane; interacts with Kar5p at the spindle pole body	01_12_08	4F4	03_F_05	SWAT	nuclear periphery	vacuole membrane	below threshold	ER	#N/A	Same	1	0	0	#N/A	1	105	124.379	17.5595	85.6957	0	#N/A	#N/A	#N/A	#N/A	1.5	#N/A	#N/A	1.11	#N/A	Tail Anchored		1	0	0	0	0	0	0	cytoplasm:cytoskeleton:nuclear membrane:nucleus:spindle pole body	nuclear membrane:spindle pole body	cytoplasm:cytoskeleton:nuclear membrane:nucleus:spindle pole body	0	#N/A	#N/A	#N/A	0	01
YLR220W	CCC1	Vacuolar Fe2+/Mn2+ transporter; suppresses respiratory deficit of yfh1 mutants, which lack the ortholog of mammalian frataxin, by preventing mitochondrial iron accumulation; relative distribution to the vacuole decreases upon DNA replication stress	01_12_09	3F5	08_A_03	SWAT	vacuole membrane	vacuole membrane	vacuole membrane	vacuole	below threshold	Different	1	0	0	#N/A	3	233	90.0605	37.0848	142.813	28.9597	#N/A	#N/A	#N/A	#N/A	50.9	983150000	2	66.94	16.6	0		0	0	0	0	0	0	0	Golgi:vacuolar membrane:vacuole	Golgi:vacuolar membrane:vacuole	Golgi:vacuolar membrane:vacuole	vacuolar membrane	inviable	1	#N/A	0	01
YOR187W	TUF1	Mitochondrial translation elongation factor Tu (EF-Tu); involved in fundamental pathway of mtDNA homeostasis; comprises both GTPase and guanine nucleotide exchange factor activities, while these activities are found in separate proteins in S. pombe and humans; rare mutations in human mitochondrial elongation factor Tu (EFTu) associated with severe lactic acidosis, rapidly progressive fatal enceph…	01_12_10	4F5	15_F_05	Blank	Blank	Blank	Blank	Remove	Remove	Blank	Remove	Remove	Remove	Remove	Remove	Remove	Remove	Remove	Remove	Remove	Remove	Remove	Remove	Remove	Remove	Remove	Remove	Remove	Remove	Remove	Remove	0	0	Remove	0	0	1	0	Remove	Remove	Remove	Remove	Remove	Remove	Remove	Remove	01
YML124C	TUB3	Alpha-tubulin; associates with beta-tubulin (Tub2p) to form tubulin dimer, which polymerizes to form microtubules; expressed at lower level than Tub1p; TUB3 has a paralog, TUB1, that arose from the whole genome duplication	01_12_11	3F6	16_C_05	SWAT	punctate	punctate	below threshold	nucleus,cytosol,punctate	punctate	Same	1	0	0	#N/A	0	None	253.134	14.2891	220.94	50.9046	#N/A	#N/A	49.48	127	66.6	9776500000	448	220.3	10.1	0		0	0	0	0	0	1	0	cytoplasm:cytoskeleton:microtubule:spindle pole body	microtubule:spindle pole body	cytoplasm:cytoskeleton:microtubule	spindle pole body	#N/A	#N/A	#N/A	0	01
YPL195W	APL5	Delta adaptin-like subunit of the clathrin associated protein complex; functions in transport of alkaline phosphatase to the vacuole via the alternate pathway; suppressor of loss of casein kinase 1 function; the clathrin associated protein complex is also known as AP-3	01_12_12	4F6	13_A_12	SWAT	punctate	punctate	punctate	punctate	below threshold	Same	1	0	0	#N/A	0	None	66.5897	26.7272	16.1094	27.98	#N/A	#N/A	40.03	137.7	24.6	2331700000	331	89.19	8.3	0		0	0	0	0	0	0	0	Golgi:endosome	0	Golgi:endosome	0	#N/A	#N/A	#N/A	ENSG00000065000	01
YLR229C	CDC42	Small rho-like GTPase; essential for establishment and maintenance of cell polarity; plays a role late in cell fusion via activation of key cell fusion regulator Fus2p; mutants have defects in the organization of actin and septins; human homolog CDC42 can complement yeast cdc42 mutant	01_12_13	3F7	28_C_1	SWAT	cell periphery,vacuole membrane	cell periphery,vacuole membrane	missing	missing	ER	New	2	0	0	#N/A	0	None	257.973	0	391.63	51.3285	#N/A	#N/A	#N/A	#N/A	164.2	1262500000	#N/A	227.26	13.6	Farnesylation		0	0	0	0	1	1	0	bud neck/tip:cell periphery:nuclear membrane:vacuolar membrane	bud neck/tip:cell periphery:nuclear membrane:vacuolar membrane	cell periphery	0	inviable	#N/A	#N/A	ENSG00000116574	01
YOR192C	THI72	Transporter of thiamine or related compound; contributes to uptake of 5-aminoimidazole-4-carboxamide-1-beta-D-ribofuranoside (acadesine); shares sequence similarity with Thi7p	01_12_14	4F7	06_D_06	SWAT	cell periphery,ER,vacuole	cell periphery,vacuole	vacuole membrane	below threshold	cell periphery,punctate	New	2	0	0	#N/A	10	48	91.0995	19.0052	81.4413	32.6101	#N/A	#N/A	18.28	#N/A	0	#N/A	#N/A	#N/A	13.7	0		0	0	0	0	0	0	0	integral component of membrane:membrane	0	0	0	#N/A	#N/A	#N/A	0	01
YML125C	PGA3	Putative cytochrome b5 reductase, localized to the plasma membrane; may be involved in regulation of lifespan; required for maturation of Gas1p and Pho8p, proposed to be involved in protein trafficking; PGA3 has a paralog, AIM33, that arose from the whole genome duplication	01_12_15	3F8	08_F_07	SWAT	ER	ER	ER	ER	ER	Same	1	0	0	#N/A	2	19	112.338	49.0774	226.626	43.5195	#N/A	#N/A	74.63	344.5	129.4	2947100000	300	254.43	16.7	0		0	0	0	0	0	0	0	cell periphery:endoplasmic reticulum	cell periphery	cell periphery:endoplasmic reticulum	endoplasmic reticulum	inviable	#N/A	#N/A	ENSG00000065615	01
YPL199C	YPL199C	Putative protein of unknown function; predicted to be palmitoylated	01_12_16	4F8	02_D_04	SWAT	cell periphery	cell periphery	cell periphery	cytosol	cell periphery	Different	1	0	0	#N/A	0	None	147.595	32.0972	205.419	56.2413	#N/A	#N/A	20.97	#N/A	146.6	1668400000	15	139.65	15.7	Palmitoylation		0	0	0	1	0	0	0	cytoplasm	0	cytoplasm	cytoplasm	#N/A	#N/A	#N/A	0	01
YLR237W	THI7	Plasma membrane transporter responsible for the uptake of thiamine; contributes to uptake of 5-aminoimidazole-4-carboxamide-1-beta-D-ribofuranoside (acadesine); member of the major facilitator superfamily of transporters; mutation of human ortholog causes thiamine-responsive megaloblastic anemia	01_12_17	3F9	05_A_06	SWAT	cell periphery,ER	cell periphery,vacuole	cell periphery	cell periphery,vacuole	cell periphery,punctate	Same	2	0	0	#N/A	10	48	113.63	29.0399	159.878	38.8147	#N/A	#N/A	47.61	#N/A	6.7	#N/A	33	33.91	20.3	0		0	0	0	0	0	0	0	cell periphery	cell periphery	0	0	#N/A	#N/A	#N/A	0	01
YOR193W	PEX27	Peripheral peroxisomal membrane protein; involved in controlling peroxisome size and number, interacts with Pex25p; PEX27 has a paralog, PEX25, that arose from the whole genome duplication	01_12_18	4F9	02_A_12	SWAT	punctate	punctate	punctate	punctate	below threshold	Same	1	0	0	#N/A	0	None	30.1811	19.8364	18.3779	25.8923	#N/A	#N/A	16.24	#N/A	3.7	#N/A	42	24.74	28.1	Peroxisome	Pex19 signal (by Peroxisomes DB)	0	0	0	0	0	0	0	peroxisome	peroxisome	peroxisome	0	#N/A	#N/A	#N/A	0	01
YML131W	YML131W	Protein of unknown function; similar to medium chain dehydrogenase/reductases; expression induced by stresses including osmotic shock, DNA damaging agents, and other chemicals; GFP-fusion protein localizes to the cytoplasm; protein abundance increases in response to DNA replication stress	01_12_19	3F10	04_A_04	SWAT	cytosol	cytosol	cytosol	cytosol	cytosol	Same	1	0	0	#N/A	2	134	214.312	39.6896	350.573	77.4858	#N/A	#N/A	45.13	#N/A	11.9	717820000	300	34.92	29.2	0		0	0	0	0	0	0	0	cytoplasm	0	0	cytoplasm	#N/A	#N/A	#N/A	ENSG00000140043	01
YPL200W	CSM4	Protein required for accurate chromosome segregation during meiosis; involved in meiotic telomere clustering (bouquet formation) and telomere-led rapid prophase movements; functions with meiosis-specific telomere-binding protein Ndj1p; CSM4 has a paralog, MPS2, that arose from the whole genome duplication	01_12_20	4F10	03_B_05	SWAT	ER,punctate	below threshold	below threshold	missing	below threshold	0	0	0	0	#N/A	1	136	22.7641	18.7969	7.83994	24.5634	#N/A	#N/A	#N/A	#N/A	0	#N/A	#N/A	#N/A	#N/A	Tail Anchored		1	0	0	0	0	0	0	endoplasmic reticulum:nuclear membrane:nucleus	endoplasmic reticulum	endoplasmic reticulum:nuclear membrane:nucleus	0	#N/A	#N/A	#N/A	0	01
YLR238W	FAR10	Protein involved in recovery from arrest in response to pheromone; acts in a cell cycle arrest recovery pathway independent from Far1p; interacts with Far3p, Far7p, Far8p, Far9p, and Far11p; potential Cdc28p substrate; FAR10 has a paralog, VPS64, that arose from the whole genome duplication	01_12_21	3F11	03_A_04	SWAT	ER,punctate	ER,punctate	punctate,mitochondria	missing	below threshold	New	2	0	0	#N/A	1	455	33.2131	24.5924	27.901	28.7144	#N/A	#N/A	#N/A	#N/A	10.4	#N/A	2	19.67	9.1	Tail Anchored		1	0	0	0	0	0	0	endoplasmic reticulum	endoplasmic reticulum	0	0	#N/A	#N/A	#N/A	0	01
YOR216C	RUD3	Golgi matrix protein; involved in the structural organization of the cis-Golgi; interacts genetically with COG3 and USO1	01_12_22	4F11	10_A_05	SWAT	punctate	punctate	punctate	punctate,punctate	punctate	Same	1	0	0	#N/A	0	None	88.7639	33.7622	101.503	56.0859	#N/A	#N/A	15.67	385.5	30.3	2238500000	8	61.11	7.4	0		0	0	0	0	0	0	0	Golgi	Golgi	Golgi	Golgi	#N/A	#N/A	#N/A	0	01
YML132W	COS3	Endosomal protein involved in turnover of plasma membrane proteins; member of the DUP380 subfamily of conserved, often subtelomeric COS genes; required for the multivesicular vesicle body sorting pathway that internalizes plasma membrane proteins for degradation; Cos proteins provide ubiquitin in trans for nonubiquitinated cargo proteins	01_12_23	3F12	12_G_05	SWAT	vacuole	vacuole	below threshold	vacuole	below threshold	Same	1	0	0	#N/A	4	47	43.3789	16.6358	93.6235	25.6084	#N/A	#N/A	14.23	#N/A	0	#N/A	33	#N/A	#N/A	0		0	0	0	0	0	0	0	cell periphery:vacuole	cell periphery:vacuole	0	vacuole	#N/A	#N/A	#N/A	0	01
YPL204W	HRR25	Conserved casein kinase; regulates diverse events including: vesicular traffic, DNA repair, the CVT pathway, monopolar attachment of sister kinetochores at meiosis I, and ribosomal subunit biogenesis; monopolin subunit; binds the RNAPII CTD; phosphorylates COPII coat subunits; interacts with Sit4p phosphatase; antagonizes calcineurin signaling, reducing nuclear accumulation of Crz1p; phosphorylat…	01_12_24	4F12	28_H_9	SWAT	cytosol,bud neck	punctate,bud neck	cytosol,bud neck	cytosol,nucleus	below threshold	Same	2	0	0	#N/A	0	None	77.4959	68.7478	30.084	27.0242	#N/A	#N/A	65	244	32.1	1175600000	25	99.43	8.5	0		0	0	0	0	0	0	0	bud neck/tip:cell periphery:cytoplasm:nucleolus:nucleus:peroxisome:spindle pole body	bud neck/tip:cell periphery:nucleus:peroxisome:spindle pole body	cytoplasm:nucleolus:nucleus	cytoplasm	inviable	#N/A	#N/A	ENSG00000100749	01
YLR240W	VPS34	Phosphatidylinositol (PI) 3-kinase that synthesizes PI-3-phosphate; forms membrane-associated signal transduction complex with Vps15p to regulate protein sorting; activated by the GTP-bound form of Gpa1p; a fraction is localized, with Vps15p, to nuclear pores at nucleus-vacuole junctions and may facilitate transcription elongation for genes positioned at the nuclear periphery	01_12_25	3F13	10_B_08	SWAT	cytosol,punctate	cytosol,punctate	punctate	punctate	cytosol	Same	2	0	0	#N/A	0	None	48.9015	24.9314	53.8626	30.1334	#N/A	#N/A	21.45	#N/A	3.9	102260000	22	30.65	9.6	0		0	0	0	0	0	0	0	Golgi:autophagosome:endosome:nuclear membrane:nucleus-vacuole junction:peroxisome:vacuolar membrane	autophagosome:endosome:nuclear membrane:nucleus-vacuole junction:peroxisome:vacuolar membrane	Golgi:endosome	vacuolar membrane	inviable	#N/A	#N/A	ENSG00000051382	01
YOR219C	STE13	Dipeptidyl aminopeptidase; Golgi integral membrane protein that cleaves on the carboxyl side of repeating -X-Ala- sequences, required for maturation of alpha factor, transcription is induced by a-factor	01_12_26	4F13	14_B_05	SWAT	punctate	punctate	punctate	below threshold	punctate	New	1	0	0	#N/A	1	120	61.091	24.4204	68.2258	39.0347	#N/A	#N/A	19.97	#N/A	4.9	159560000	15	32.77	9.8	0		0	0	0	0	0	0	0	Golgi:vacuolar membrane:vacuole	Golgi	vacuolar membrane:vacuole	0	#N/A	#N/A	#N/A	ENSG00000078098	01
YMR010W	YMR010W	Putative protein of unknown function; null allele suppresses the lethality of neo1 and dop1 null alleles, as well as the growth defect of a mon2 null allele, and the cold sensitivity of a drs2 null; proposed function as a phospholipid scramblase that reduces membrane asymmetry; PQ loop family member; localizes to the cytoplasm and endoplasmic reticulum in HTP studies; non-essential gene	01_12_27	3F14	06_C_12	SWAT	ER	ER	nuclear periphery	punctate,punctate	ER	Different	1	0	0	#N/A	8	51	110.165	30.5177	203.758	44.0218	#N/A	#N/A	16.41	#N/A	14.6	149140000	300	78.99	10	0		0	0	0	0	0	0	0	cytoplasm	0	0	cytoplasm	#N/A	#N/A	#N/A	0	01
YPL206C	PGC1	Phosphatidylglycerol phospholipase C; regulates phosphatidylglycerol (PG) accumulation via a phospholipase C-type degradation mechanism; PG levels affect mitochondrial function; contains glycerophosphodiester phosphodiesterase motifs	01_12_28	4F14	03_F_03	SWAT	punctate	ER,punctate	punctate	punctate	punctate	Same	1	0	0	#N/A	1	297	87.8281	33.5779	29.0928	33.4607	#N/A	#N/A	#N/A	#N/A	67.5	478470000	18	58.11	34.7	Tail Anchored		1	0	0	0	0	0	0	lipid particle:mitochondria	lipid particle:mitochondria	mitochondria	mitochondria	#N/A	#N/A	#N/A	0	01
YLR241W	CSC1	Calcium permeable gated cation channel; may be involved in detoxification; similar to Arabidopsis CSC1	01_12_29	3F15	06_B_03	SWAT	ER	below threshold	below threshold	below threshold	below threshold	New	1	0	0	#N/A	11	37	30.5893	20.0505	8.40263	23.8021	#N/A	#N/A	15.08	#N/A	9	85630000	#N/A	57.96	10.2	0		0	0	0	0	0	0	0	vacuolar membrane	0	0	vacuolar membrane	#N/A	2	#N/A	0	01
YOR223W	DSC3	Subunit of the DSC ubiquitin ligase complex; protein of unknown function that localizes to the ER and vacuole lumen; overexpression affects endocytic protein trafficking; ortholog of fission yeast dsc3	01_12_30	4F15	09_G_12	SWAT	ER	vacuole	punctate	below threshold	below threshold	New	1	0	0	#N/A	2	244	35.9304	25.482	16.5008	23.6533	#N/A	#N/A	16.45	#N/A	13.4	73074000	22	20.9	9	0		0	0	0	0	0	0	0	endoplasmic reticulum:vacuole	endoplasmic reticulum:vacuole	endoplasmic reticulum	0	#N/A	#N/A	#N/A	0	01
YMR011W	HXT2	High-affinity glucose transporter of the major facilitator superfamily; expression is induced by low levels of glucose and repressed by high levels of glucose	01_12_31	3F16	05_G_05	SWAT	cell periphery,vacuole	cell periphery,vacuole	cell periphery,cytosol	cell periphery,vacuole	cell periphery,punctate	Same	2	0	0	#N/A	12	50	76.7686	41.7229	124.297	35.8446	#N/A	#N/A	177.05	764	149.4	209420000	300	222.42	#N/A	0		0	0	0	0	0	0	0	cell periphery	cell periphery	0	0	#N/A	#N/A	#N/A	ENSG00000160326	01
YPL217C	BMS1	GTPase required for ribosomal subunit synthesis and rRNA processing; required for synthesis of 40S ribosomal subunits and for processing the 35S pre-rRNA at sites A0, A1, and A2; interacts with Rcl1p, which stimulates its GTPase and U3 snoRNA binding activities; has similarity to Tsr1p	01_12_32	4F16	15_E_08	SWAT	nucleus	nucleus,nucleolus	punctate	below threshold	nucleus	New	1	0	0	#N/A	0	None	100.279	17.3014	40.8913	35.9173	#N/A	#N/A	19	#N/A	25.1	4404000000	#N/A	91.56	7.1	0		0	0	xxRR	0	0	1	0	cytoplasm:mitochondria:nucleolus:nucleus	cytoplasm:nucleolus:nucleus	cytoplasm:nucleolus:nucleus	mitochondria	inviable	#N/A	#N/A	ENSG00000165733	01
YLR242C	ARV1	Cortical ER protein; implicated in the membrane insertion of tail-anchored C-terminal single transmembrane domain proteins; may function in transport of glycosylphosphatidylinositol intermediates into the ER lumen; required for normal intracellular sterol distribution; human ARV1, required for normal cholesterol and bile acid homeostasis, can complement yeast arv1 null mutant; human variant causi…	01_12_33	3F17	14_H_06	SWAT	ER	ER	below threshold	below threshold	below threshold	New	1	0	0	#N/A	4	105	48.6369	16.3427	52.2171	27.536	#N/A	#N/A	16.14	#N/A	6.3	#N/A	#N/A	20.7	14.5	0		0	0	0	0	0	0	0	Golgi:endoplasmic reticulum	Golgi:endoplasmic reticulum	Golgi:endoplasmic reticulum	0	#N/A	#N/A	#N/A	0	01
YJL102W	MEF2	Mitochondrial elongation factor involved in translational elongation	01_12_34	4F17	10_A_02	Blank	Blank	Blank	Blank	Remove	Remove	Blank	Remove	Remove	Remove	Remove	Remove	Remove	Remove	Remove	Remove	Remove	Remove	Remove	Remove	Remove	Remove	Remove	Remove	Remove	Remove	Remove	Remove	0	0	Remove	0	0	0	0	Remove	Remove	Remove	Remove	Remove	Remove	Remove	Remove	01
YMR013C	SEC59	Dolichol kinase; catalyzes the terminal step in dolichyl monophosphate (Dol-P) biosynthesis; required for viability and for normal rates of lipid intermediate synthesis and protein N-glycosylation	01_12_35	3F18	06_B_10	SWAT	ER	ER	ER	missing	below threshold	New	1	0	0	#N/A	15	51	38.3927	26.0199	60.7291	29.3585	#N/A	#N/A	#N/A	#N/A	6	#N/A	#N/A	28.07	24.2	0		0	0	0	0	0	0	0	endoplasmic reticulum	endoplasmic reticulum	endoplasmic reticulum	0	inviable	#N/A	#N/A	ENSG00000175283	01
YPL227C	ALG5	UDP-glucose:dolichyl-phosphate glucosyltransferase; involved in asparagine-linked glycosylation in the endoplasmic reticulum; human ortholog ALG5 can partially complement yeast alg5 mutant	01_12_36	4F18	08_C_12	SWAT	punctate	punctate	punctate	ER	below threshold	Different	1	0	0	#N/A	1	12	91.5692	39.4891	83.3524	22.7696	#N/A	#N/A	32.62	145.5	46.5	609700000	300	101.23	7.7	0		0	0	0	0	0	0	0	endoplasmic reticulum	endoplasmic reticulum	endoplasmic reticulum	0	#N/A	#N/A	#N/A	ENSG00000120697	01
YLR246W	ERF2	Subunit of a palmitoyltransferase; this complex adds a palmitoyl lipid moiety to heterolipidated substrates such as Ras1p and Ras2p through a thioester linkage; mutants partially mislocalize Ras2p to the vacuole; palmitoyltransferase is composed of Erf2p and Shr5p	01_12_37	3F19	10_B_10	SWAT	below threshold	cell periphery,vacuole	below threshold	below threshold	below threshold	0	0	0	0	#N/A	4	76	19.2433	21.4925	18.4668	23.4766	#N/A	#N/A	15.23	#N/A	1.8	#N/A	#N/A	15.63	9	0		0	0	0	0	0	0	0	endoplasmic reticulum	endoplasmic reticulum	endoplasmic reticulum	0	#N/A	#N/A	#N/A	ENSG00000184307	01
YOR237W	HES1	Protein implicated in the regulation of ergosterol biosynthesis; one of a seven member gene family with a common essential function and non-essential unique functions; similar to human oxysterol binding protein (OSBP); SWAT-GFP and mCherry fusion proteins localize to the bud neck and vacuolar membrane; HES1 has a paralog, KES1, that arose from the whole genome duplication	01_12_38	4F19	14_C_12	SWAT	punctate,vacuole membrane,bud	ER,punctate,bud	below threshold	below threshold	cytosol	New	3	0	0	#N/A	0	None	80.4268	20.3459	81.3513	36.3348	#N/A	#N/A	18.02	#N/A	0.3	#N/A	25	4.88	17.2	0		0	0	0	0	0	0	0	cellular_component	0	0	0	#N/A	#N/A	#N/A	0	01
YMR015C	ERG5	C-22 sterol desaturase; a cytochrome P450 enzyme that catalyzes the formation of the C-22(23) double bond in the sterol side chain in ergosterol biosynthesis; may be a target of azole antifungal drugs	01_12_39	3F20	09_D_12	SWAT	ER	ER	ER	ER	below threshold	Same	1	0	0	#N/A	1	45	50.7352	59.878	35.1943	23.9416	#N/A	#N/A	91.07	342	56.2	2030400000	#N/A	164.11	11.4	0		0	0	0	0	0	0	0	endoplasmic reticulum	0	0	endoplasmic reticulum	#N/A	2	#N/A	0	01
YPL231W	FAS2	Alpha subunit of fatty acid synthetase; complex catalyzes the synthesis of long-chain saturated fatty acids; contains the acyl-carrier protein domain and beta-ketoacyl reductase, beta-ketoacyl synthase and self-pantetheinylation activities	01_12_40	4F20	16_G_01	SWAT	cytosol	cytosol	cytosol	cytosol	#N/A	Same	1	0	0	#N/A	0	None	417.988	379.52	168.951	0	#N/A	#N/A	519.37	2315	188.4	341000000000	19	896.19	11.5	0		0	0	0	0	0	0	0	cytoplasm:mitochondria	cytoplasm	0	cytoplasm:mitochondria	inviable	#N/A	#N/A	0	01
YLR251W	SYM1	Protein required for ethanol metabolism; induced by heat shock and localized to the inner mitochondrial membrane; homologous to mammalian peroxisomal membrane protein Mpv17; human homolog MPV17 is implicated in hepatocerebral mtDNA depletion syndromes (MDDS), and complements yeast null mutant	01_12_41	3F21	02_A_09	SWAT	mitochondria	cell periphery,vacuole	below threshold	below threshold	below threshold	New	1	0	0	#N/A	5	20	56.7563	21.1576	46.2585	23.5336	#N/A	#N/A	14.98	#N/A	6.9	193350000	44	22.48	23.1	Peroxisome	0	0	0	0	0	0	0	0	mitochondria	mitochondria	mitochondria	mitochondria	#N/A	#N/A	#N/A	ENSG00000115204	01
YOR241W	MET7	Folylpolyglutamate synthetase; catalyzes extension of the glutamate chains of the folate coenzymes, required for methionine synthesis and for maintenance of mitochondrial DNA; protein abundance increases in response to DNA replication stress	01_12_42	4F21	10_A_03	SWAT	ER	ER	below threshold	cytosol	below threshold	Different	1	0	0	#N/A	1	39	53.0456	11.7755	54.4678	26.7141	#N/A	#N/A	64.21	319	34.2	849280000	99	77.77	14.7	0		0	0	0	0	0	0	0	cytoplasm:mitochondria	cytoplasm:mitochondria	cytoplasm:mitochondria	0	#N/A	#N/A	#N/A	ENSG00000136877	01
YMR018W	YMR018W	Putative protein of unknown function with similarity to human PEX5Rp; transcription increases during colony development similar to genes involved in peroxisome biogenesis; YMR018W is not an essential gene; PEX5Rp is also known as peroxin protein 5 related protein	01_12_43	3F22	02_B_09	SWAT	cytosol,punctate	punctate	punctate	below threshold	below threshold	New	1	0	0	#N/A	0	None	44.081	16.6946	15.1139	25.4089	#N/A	#N/A	15.04	#N/A	0	#N/A	#N/A	3.35	15.9	Peroxisome	0	0	0	0	0	0	0	0	cytoplasm:peroxisome	0	cytoplasm:peroxisome	0	#N/A	#N/A	#N/A	0	01
YPL232W	SSO1	Plasma membrane t-SNARE; involved in fusion of secretory vesicles at the plasma membrane and in vesicle fusion during sporulation; forms a complex with Sec9p that binds v-SNARE Snc2p; syntaxin homolog; functionally redundant with Sso2p; SSO1 has a paralog, SSO2, that arose from the whole genome duplication	01_12_44	4F22	01_E_12	SWAT	cell periphery	cell periphery,vacuole	cell periphery,bud	punctate	cell periphery	Different	1	0	0	#N/A	1	266	169.571	57.1291	219.364	51.8475	#N/A	#N/A	#N/A	#N/A	73.2	11393000000	14	132.88	8.7	Palmitoylation		0	0	0	1	0	0	0	cell periphery:vacuolar membrane	cell periphery:vacuolar membrane	0	cell periphery	#N/A	2.5	#N/A	ENSG00000135604	01
YLR260W	LCB5	Minor sphingoid long-chain base kinase; possibly involved in synthesis of long-chain base phosphates, which function as signaling molecules; LCB5 has a paralog, LCB4, that arose from the whole genome duplication	01_12_45	3F23	14_A_09	Blank	Blank	Blank	Blank	ambiguous	below threshold	Blank	1	0	0	#N/A	0	None	71.3415	29.5376	112.759	27.0399	#N/A	#N/A	15.79	#N/A	9.8	271460000	3	35.25	10.9	0		0	0	0	0	0	0	0	Golgi	Golgi	Golgi	0	#N/A	#N/A	#N/A	ENSG00000100422	01
YOR242C	SSP2	Sporulation specific protein that localizes to the spore wall; required for sporulation at a point after meiosis II and during spore wall formation; expression controlled by a tightly regulated middle-meiotic promoter that is activated by Ndt80p; translation of SSP2 mRNA is delayed, such that the mRNA is present as nuclear divisions are taking place but is not engaged by ribosomes until relativel…	01_12_46	4F23	01_G_02	SWAT	punctate,nucleus	nucleus	below threshold	below threshold	below threshold	New	1	0	0	#N/A	0	None	41.094	18.3824	7.10111	23.0281	#N/A	#N/A	13.11	#N/A	0	#N/A	#N/A	7.56	4.4	Farnesylation		0	0	0	0	1	0	0	ascospore wall:prospore membrane:spore wall	ascospore wall	spore wall	prospore membrane	#N/A	#N/A	#N/A	0	01
YMR019W	STB4	Putative transcription factor; contains a Zn(II)2Cys6 zinc finger domain characteristic of DNA-binding proteins; computational analysis suggests a role in regulation of expression of genes encoding transporters; binds Sin3p in a two-hybrid assay;	01_12_47	3F24	13_H_09	SWAT	ambiguous	below threshold	below threshold	nucleus	#N/A	Different	1	0	0	#N/A	2	18	18.9964	18.6632	5.14395	23.1485	#N/A	#N/A	20.99	#N/A	4.3	19334000	3	27.49	9.2	0		0	0	0	0	0	0	0	nucleus	nucleus	nucleus	0	#N/A	#N/A	#N/A	0	01
YPL236C	ENV7	Vacuolar membrane protein kinase; negatively regulates membrane fusion; associates with vacuolar membrane through palmitoylation of one or more cysteines in consensus sequence; vacuolar membrane association is essential to its kinase activity; mutant shows defect in CPY processing; ortholog of human serine/threonine kinase 16 (STK16)	01_12_48	4F24	02_D_05	SWAT	punctate,vacuole membrane	cell periphery,punctate	punctate,vacuole membrane	vacuole membrane	below threshold	Same	2	0	0	#N/A	0	None	59.6738	27.2098	65.0736	25.1048	#N/A	#N/A	28.28	#N/A	4.5	101600000	#N/A	18.25	11.1	Palmitoylation		0	0	0	1	0	0	0	vacuolar membrane:vacuole	0	vacuolar membrane:vacuole	vacuolar membrane	#N/A	#N/A	#N/A	ENSG00000115661	01
YBL050W	SEC17	Alpha-SNAP cochaperone; SNARE-complex adaptor for Sec18 (NSF) during the disassembly of postfusion cis-SNARE complexes; stimulates the ATPase activity of Sec18p; peripheral membrane protein required for vesicular transport between ER and Golgi, the 'priming' step in homotypic vacuole fusion, and autophagy; similar to mammalian alpha-SNAP	01_13_01	1G1	28_B_10	SWAT	punctate	cytosol,ER	below threshold	below threshold	cytosol	New	2	0	0	#N/A	0	None	58.3041	17.4155	162.45	47.7354	#N/A	#N/A	14.64	#N/A	117.2	5177500000	#N/A	137.87	16.8	0		0	0	0	0	0	0	0	cytoplasm:vacuolar membrane	cytoplasm	0	vacuolar membrane	inviable	2.5	#N/A	ENSG00000125814	01
YER083C	GET2	Subunit of the GET complex; involved in insertion of proteins into the ER membrane; required for the retrieval of HDEL proteins from the Golgi to the ER in an ERD2 dependent fashion and for meiotic nuclear division	01_13_02	2G1	08_A_04	SWAT	ER	missing	ER	ER	#N/A	Same	1	0	0	#N/A	3	151	99.0474	37.0419	#N/A	#N/A	#N/A	#N/A	38.61	127	71.6	1694300000	#N/A	102.23	10.2	0		0	0	0	0	0	0	0	Golgi:endoplasmic reticulum	0	Golgi:endoplasmic reticulum	endoplasmic reticulum	#N/A	#N/A	#N/A	0	01
YBR290W	BSD2	Heavy metal ion homeostasis protein; facilitates trafficking of Smf1p and Smf2p metal transporters to vacuole where they are degraded; acts as an adaptor protein with Rsp5p in the regulated endocytosis of Smf1p and is itself ubiquitylated by Rsp5p; controls metal ion transport, prevents metal hyperaccumulation, functions in copper detoxification	01_13_03	1G2	10_G_11	SWAT	punctate,vacuole	vacuole	ambiguous	ER,vacuole	below threshold	Same	2	0	0	#N/A	3	179	33.6177	25.6479	41.5513	25.4844	#N/A	#N/A	14.59	#N/A	26.4	#N/A	48	42.01	16.9	0		0	0	0	0	0	0	0	endoplasmic reticulum:vacuolar membrane:vacuole	endoplasmic reticulum:vacuolar membrane:vacuole	endoplasmic reticulum:vacuole	0	#N/A	#N/A	#N/A	0	01
YGL167C	PMR1	High affinity Ca2+/Mn2+ P-type ATPase; required for Ca2+ and Mn2+ transport into Golgi; involved in Ca2+ dependent protein sorting, processing; D53A mutant (Mn2+ transporting) is rapamycin sensitive, Q783A mutant (Ca2+ transporting) is rapamycin resistant; Mn2+ transport into Golgi lumen required for rapamycin sensitivity; mutations in human homolog ATP2C1 cause acantholytic skin condition Hailey…	01_13_04	2G2	07_D_02	SWAT	punctate	punctate	punctate	ER	punctate	Different	1	0	0	#N/A	8	93	128.592	34.2125	151.556	37.5309	#N/A	#N/A	25.32	538.3	24.6	23453000000	57	158.63	7.5	0		0	0	0	0	0	0	0	Golgi	Golgi	Golgi	0	#N/A	#N/A	#N/A	ENSG00000105409	01
YBL058W	SHP1	UBX domain-containing substrate adaptor for Cdc48p; ubiquitin regulatory X domain-containing protein that acts as a substrate recruiting cofactor for Cdc48p; positively regulates Glc7p PPase activity to promote growth and mitotic progression in complex with Cdc48p; ubiquitinated protein interactor involved in ER-associated degradation (ERAD); regulated by nuclear Ub-dependent degradation (INMAD p…	01_13_05	1G3	12_A_11	SWAT	cytosol,nucleus	cytosol,nucleus	below threshold	nucleus,cytosol	cytosol	Same	2	0	0	#N/A	0	None	119.522	21.67	185.484	43.5927	#N/A	#N/A	61.64	252	142.9	4716000000	62	173.47	10.8	0		0	0	0	0	0	0	0	cytoplasm:nucleus	0	cytoplasm:nucleus	cytoplasm:nucleus	#N/A	#N/A	#N/A	ENSG00000088833	01
YER087C-B	SBH1	Beta subunit of Sec61p ER translocation complex (Sec61p-Sss1p-Sbh1p); involved in protein translocation into the endoplasmic reticulum; interacts with the exocyst complex and also with Rtn1p; cotranslationally N-acetylated by NatA; SBH1 has a paralog, SBH2, that arose from the whole genome duplication	01_13_06	2G3	28_A_3	SWAT	ER	ER	ER	ambiguous	ER	New	1	0	0	#N/A	1	55	245.582	67.4579	405.531	49.313	#N/A	#N/A	#N/A	#N/A	683.1	42484000	#N/A	#N/A	11.3	Tail Anchored		1	0	0	0	0	0	0	endoplasmic reticulum	0	endoplasmic reticulum	0	#N/A	#N/A	#N/A	0	01
YBR293W	VBA2	Permease of basic amino acids in the vacuolar membrane	01_13_07	1G4	05_A_10	SWAT	ER	ER	below threshold	below threshold	below threshold	New	1	0	0	#N/A	13	6	33.0214	18.3533	27.7172	25.1524	#N/A	#N/A	14.51	#N/A	1.2	#N/A	#N/A	19.31	10.8	0		0	0	xxRR	0	0	0	0	vacuolar membrane:vacuole	vacuolar membrane	vacuolar membrane:vacuole	0	#N/A	#N/A	#N/A	0	01
YGL168W	HUR1	Protein of unknown function; reported null mutant phenotype of hydroxyurea sensitivity may be due to effects on overlapping PMR1 gene	01_13_08	2G4	03_F_11	SWAT	below threshold	below threshold	below threshold	below threshold	#N/A	0	0	0	0	#N/A	1	12	14.8225	14.5726	5.70653	23.0544	#N/A	#N/A	18.14	#N/A	0	#N/A	#N/A	#N/A	#N/A	0		0	0	0	0	0	0	0	cellular_component:integral component of membrane:membrane	0	0	0	#N/A	#N/A	#N/A	0	01
YBL059W	YBL059W	Putative protein of unknown function; the authentic, non-tagged protein is detected in highly purified mitochondria in high-throughput studies; YBL059W has a paralog, YER093C-A, that arose from the whole genome duplication	01_13_09	1G5	11_F_02	SWAT	mitochondria	mitochondria	mitochondria	mitochondria	below threshold	Same	1	0	0	#N/A	2	70	38.0462	17.4481	31.4864	24.0201	#N/A	#N/A	19.36	#N/A	21	#N/A	71	22.95	16.4	0		0	0	0	0	0	0	0	mitochondria	0	0	mitochondria	#N/A	2	#N/A	0	01
YER093C	TSC11	Subunit of TORC2 (Tor2p-Lst8p-Avo1-Avo2-Tsc11p-Bit61p); TORC2 is a membrane-associated complex that regulates actin cytoskeletal dynamics during polarized growth and cell wall integrity; involved in sphingolipid metabolism; contains a RasGEFN domain	01_13_10	2G5	11_B_07	SWAT	cytosol	cytosol	below threshold	cytosol	cytosol	Same	1	0	0	#N/A	0	None	31.8665	19.3682	25.7602	29.9476	#N/A	#N/A	21.93	#N/A	2.9	16076000	#N/A	24.61	7.1	0		0	0	0	0	0	0	0	cell periphery:vacuolar membrane:vacuole	0	cell periphery:vacuolar membrane:vacuole	0	inviable	#N/A	#N/A	ENSG00000164327	01
Control-his3d-SWAT	None	#N/A	01_13_11	1G6	#N/A	SWAT	cytosol	cytosol	below threshold	#N/A	missing	#N/A	#N/A	0	#N/A	#N/A	#N/A	#N/A	197.904	18.4243	196.422	33.3684	#N/A	#N/A	#N/A	#N/A	#N/A	#N/A	#N/A	#N/A	#N/A	#N/A	#N/A	0	0	#N/A	0	0	0	0	#N/A	#N/A	#N/A	#N/A	#N/A	#N/A	#N/A	#N/A	01
Control-his3d-SWAT	None	#N/A	01_13_12	2G6	#N/A	SWAT	cytosol	cytosol	below threshold	#N/A	missing	#N/A	#N/A	0	#N/A	#N/A	#N/A	#N/A	212.926	17.6081	197.274	33.9862	#N/A	#N/A	#N/A	#N/A	#N/A	#N/A	#N/A	#N/A	#N/A	#N/A	#N/A	0	0	#N/A	0	0	0	0	#N/A	#N/A	#N/A	#N/A	#N/A	#N/A	#N/A	#N/A	01
YBL061C	SKT5	Activator of Chs3p (chitin synthase III) during vegetative growth; recruits Chs3p to the bud neck via interaction with Bni4p; SKT5 has a paralog, SHC1, that arose from the whole genome duplication	01_13_13	1G7	01_A_04	SWAT	bud neck	cell periphery,bud	bud neck	bud neck,nucleus,cytosol	cell periphery,punctate	Same	1	0	0	#N/A	0	None	56.0979	24.0893	66.6665	37.9434	#N/A	#N/A	NA	76.4	15.8	528980000	10	69.23	6.8	Farnesylation		0	0	0	0	1	0	0	bud neck/tip:cell periphery	bud neck/tip	cell periphery	0	#N/A	#N/A	#N/A	0	01
YER093C-A	AIM11	Protein of unknown function; null mutant is viable but shows increased loss of mitochondrial genome and synthetic interaction with prohibitin (phb1); contains an intron; SWAT-GFP and mCherry fusion proteins localize to the mitochondria; YER093C-A has a paralog, YBL059W, that arose from the whole genome duplication	01_13_14	2G7	12_H_10	SWAT	punctate,mitochondria	punctate	below threshold	below threshold	below threshold	New	2	0	0	#N/A	2	20	23.9843	14.0146	11.4297	25.3322	#N/A	#N/A	16.74	#N/A	14.8	56061000	1178	#N/A	11.7	0		0	0	0	0	0	0	0	cellular_component:integral component of membrane:membrane	0	0	0	#N/A	#N/A	#N/A	0	01
Control-his3d-GFPdC	None	#N/A	01_13_15	1G8	#N/A	SWAT	below threshold	below threshold	below threshold	#N/A	missing	#N/A	#N/A	0	#N/A	#N/A	#N/A	#N/A	12.0691	18.1808	#N/A	0	#N/A	#N/A	#N/A	#N/A	#N/A	#N/A	#N/A	#N/A	#N/A	#N/A	#N/A	0	0	#N/A	0	0	0	0	#N/A	#N/A	#N/A	#N/A	#N/A	#N/A	#N/A	#N/A	01
Control-his3d-GFPdC	None	#N/A	01_13_16	2G8	#N/A	SWAT	below threshold	below threshold	below threshold	#N/A	missing	#N/A	#N/A	0	#N/A	#N/A	#N/A	#N/A	11.5337	11.6765	#N/A	#N/A	#N/A	#N/A	#N/A	#N/A	#N/A	#N/A	#N/A	#N/A	#N/A	#N/A	#N/A	0	0	#N/A	0	0	0	0	#N/A	#N/A	#N/A	#N/A	#N/A	#N/A	#N/A	#N/A	01
YBL069W	AST1	Lipid raft associated protein; interacts with the plasma membrane ATPase Pma1p and has a role in its targeting to the plasma membrane by influencing its incorporation into lipid rafts; sometimes classified in the medium-chain dehydrogenase/reductases (MDRs) superfamily; AST1 has a paralog, AST2, that arose from the whole genome duplication	01_13_17	1G9	14_E_02	SWAT	punctate	cytosol,punctate	punctate	nucleus,cytosol	cytosol	Different	1	0	0	#N/A	0	None	103.32	32.1987	185.668	54.7013	#N/A	#N/A	14.97	#N/A	28.2	1357100000	6	44.74	13.7	0		0	0	0	0	0	0	0	Golgi:cell periphery:endosome	Golgi:cell periphery:endosome	0	0	#N/A	#N/A	#N/A	0	01
YER094C	PUP3	Beta 3 subunit of the 20S proteasome; involved in ubiquitin-dependent catabolism; human homolog is subunit C10	01_13_18	2G9	10_G_10	SWAT	nucleus	cytosol,nucleus	nucleolus	missing	nucleus	New	1	0	0	#N/A	0	None	173.008	164.124	218.808	40.2902	#N/A	#N/A	#N/A	#N/A	195.7	2321000000	#N/A	257.84	12.7	0		0	0	0	0	0	0	0	cytoplasm:endoplasmic reticulum:nucleus	endoplasmic reticulum:nucleus	cytoplasm:nucleus	0	inviable	#N/A	#N/A	ENSG00000277791	01
Control-URA+	None	#N/A	01_13_19	1G10	#N/A	SWAT	below threshold	missing	missing	#N/A	#N/A	#N/A	#N/A	0	#N/A	#N/A	#N/A	#N/A	13.2419	0	0	0	#N/A	#N/A	#N/A	#N/A	#N/A	#N/A	#N/A	#N/A	#N/A	#N/A	#N/A	0	0	#N/A	0	0	0	0	#N/A	#N/A	#N/A	#N/A	#N/A	#N/A	#N/A	#N/A	01
Control-URA+	None	#N/A	01_13_20	2G10	#N/A	SWAT	below threshold	missing	missing	#N/A	#N/A	#N/A	#N/A	0	#N/A	#N/A	#N/A	#N/A	13.1969	0	#N/A	0	#N/A	#N/A	#N/A	#N/A	#N/A	#N/A	#N/A	#N/A	#N/A	#N/A	#N/A	0	0	#N/A	0	0	0	0	#N/A	#N/A	#N/A	#N/A	#N/A	#N/A	#N/A	#N/A	01
YBL078C	ATG8	Component of autophagosomes and Cvt vesicles; regulator of Atg1p, targets it to autophagosomes; binds the Atg1p-Atg13p complex, triggering its vacuolar degradation; unique ubiquitin-like protein whose conjugation target is lipid phosphatidylethanolamine (PE); Atg8p-PE is anchored to membranes, is involved in phagophore expansion, and may mediate membrane fusion during autophagosome formation; dec…	01_13_21	1G11	10_G_05	SWAT	cytosol,punctate	cytosol,punctate	punctate	below threshold	cytosol,punctate	New	2	0	0	#N/A	0	None	75.9418	27.5728	189.935	38.4164	#N/A	#N/A	16.62	#N/A	57.3	859930000	289	29.02	10.2	0		0	0	0	0	0	0	0	autophagosome:cytoplasm:vacuolar membrane:vacuole	autophagosome:cytoplasm:vacuolar membrane	autophagosome:vacuolar membrane:vacuole	0	#N/A	#N/A	#N/A	ENSG00000139112	01
YER100W	UBC6	Ubiquitin-conjugating enzyme involved in ERAD; located at the cytosolic side of the ER membrane; tail region contains a transmembrane segment at the C-terminus; substrate of the ubiquitin-proteasome pathway; ER-associated protein degradation is also known as ERAD	01_13_22	2G11	03_H_05	SWAT	ER	ER	ER	ER	ER	Same	1	0	0	#N/A	1	232	95.7402	25.905	111.798	34.8461	#N/A	#N/A	#N/A	#N/A	110.6	294440000	26	88.98	12	Tail Anchored		1	0	0	0	0	0	0	endoplasmic reticulum	endoplasmic reticulum	endoplasmic reticulum	0	#N/A	#N/A	#N/A	ENSG00000198833	01
YBR294W	SUL1	High affinity sulfate permease of the SulP anion transporter family; sulfate uptake is mediated by specific sulfate transporters Sul1p and Sul2p, which control the concentration of endogenous activated sulfate intermediates	01_13_23	1G12	06_H_08	SWAT	ER	vacuole	mitochondria	below threshold	below threshold	New	1	0	0	#N/A	10	94	67.8723	18.0931	36.4976	27.0597	#N/A	#N/A	17.72	#N/A	0.1	#N/A	#N/A	0.23	#N/A	0		0	0	0	0	0	0	0	cell periphery	cell periphery	0	0	#N/A	#N/A	#N/A	ENSG00000181045	01
YGL180W	ATG1	Protein serine/threonine kinase; required for vesicle formation in autophagy and the cytoplasm-to-vacuole targeting (Cvt) pathway; structurally required for phagophore assembly site formation; during autophagy forms a complex with Atg13p and Atg17p; essential for cell cycle progression from G2/M to G1 under nitrogen starvation	01_13_24	2G12	12_G_06	SWAT	cytosol	cytosol,vacuole	below threshold	punctate	cytosol	Different	1	0	0	#N/A	0	None	48.1528	19.8127	44.0159	34.2616	#N/A	#N/A	16.36	#N/A	3.2	115620000	47	21.78	7.5	0		0	0	0	0	0	0	0	autophagosome:cytoplasm	autophagosome:cytoplasm	autophagosome:cytoplasm	0	inviable	1	#N/A	ENSG00000146872	01
YBL082C	ALG3	Dolichol-P-Man dependent alpha(1-3) mannosyltransferase; involved in synthesis of dolichol-linked oligosaccharide donor for N-linked glycosylation of proteins; G353A missense mutation in human ortholog ALG3 implicated in carbohydrate deficient glycoprotein syndrome type IV, which is characterized by microcephaly, severe epilepsy, minimal psychomotor development, partial deficiency of sialic acids…	01_13_25	1G13	04_G_01	SWAT	ER	ER	ER	vacuole,cytosol	ER	Different	1	0	0	#N/A	10	44	138.247	25.481	223.747	45.6306	#N/A	#N/A	20.92	#N/A	16.4	46974000	30	55.02	11	0		0	0	KKxx	0	0	0	0	endoplasmic reticulum	endoplasmic reticulum	endoplasmic reticulum	0	#N/A	#N/A	13	ENSG00000214160	01
YER118C	SHO1	Transmembrane osmosensor for filamentous growth and HOG pathways; involved in activation of the Cdc42p- and MAP kinase-dependent filamentous growth pathway and the high-osmolarity glycerol (HOG) response pathway; phosphorylated by Hog1p; interacts with Pbs2p, Msb2p, Hkr1p, and Ste11p	01_13_26	2G13	08_F_01	SWAT	cell periphery,ER,bud neck	cell periphery,ER,bud neck	bud neck	bud neck,cell periphery,cytosol	punctate,bud neck	Same	3	0	0	#N/A	4	33	104.652	22.6819	155.694	31.9144	#N/A	#N/A	NA	#N/A	24.1	#N/A	95	77.64	8.7	0		0	0	0	0	0	0	0	bud neck/tip:cell periphery	bud neck/tip:cell periphery	bud neck/tip:cell periphery	0	#N/A	#N/A	#N/A	0	01
YKL176C	LST4	Subunit of the Lst4p-Lst7p GTPase activating protein complex for Gtr2p; stimulates the GTPase activity of Rag family GTPase Gtr2p, within the context of the Gtr1p-Gtr2p heterodimer, after amino acid stimulation; required for activation of TORC1 in response to amino acid stimulation; recruited to the vacuolar membrane during amino acid starvation and released from the membrane by TORC1; required f…	01_13_27	1G14	07_B_04	SWAT	cytosol	cytosol	below threshold	ambiguous	below threshold	New	1	0	0	#N/A	2	324	33.7622	14.6746	17.1216	26.6941	#N/A	#N/A	18.45	#N/A	4.1	18198000	6	68.71	10.3	ActiveX VT_ERROR:	ActiveX VT_ERROR:	0	0	ActiveX VT_ERROR:	0	1	0	0	ActiveX VT_ERROR:	ActiveX VT_ERROR:	ActiveX VT_ERROR:	ActiveX VT_ERROR:	#N/A	#N/A	#N/A	0	01
YGL184C	STR3	Peroxisomal cystathionine beta-lyase; converts cystathionine into homocysteine; may be redox regulated by Gto1p; involved in the release of the aromatic thiol 3-mercaptohexanol during wine fermentation	01_13_28	2G14	03_F_01	SWAT	punctate	punctate	punctate	nucleus,cytosol	punctate	Different	1	0	0	#N/A	0	None	82.6057	28.1859	111.008	23.5876	#N/A	#N/A	#N/A	#N/A	4.5	91140000	2	8.04	12.2	Peroxisome	0	0	0	0	0	0	0	1	cytoplasm:nucleus:peroxisome	peroxisome	cytoplasm:nucleus	cytoplasm:nucleus	#N/A	#N/A	#N/A	0	01
YBL089W	AVT5	Putative transporter; member of a family of seven S. cerevisiae genes (AVT1-7) related to vesicular GABA-glycine transporters; AVT5 has a paralog, AVT6, that arose from the whole genome duplication	01_13_29	1G15	15_F_01	SWAT	punctate	punctate	below threshold	below threshold	below threshold	New	1	0	6	0	8	33	40.5791	19.3239	57.2134	27.3941	#N/A	#N/A	13.73	#N/A	5.9	#N/A	#N/A	25.63	9.5	Bearing Signal Sequence		0	0	0	0	0	0	0	vacuolar membrane:vacuole	0	vacuolar membrane:vacuole	0	#N/A	#N/A	#N/A	ENSG00000166558	01
YER119C	AVT6	Vacuolar aspartate and glutamate exporter; member of a family of seven genes (AVT1-7) related to vesicular GABA-glycine transporters; involved in compartmentalizing acidic amino acids in response to nitrogen starvation; AVT6 has a paralog, AVT5, that arose from the whole genome duplication	01_13_30	2G15	28_E_12	SWAT	vacuole membrane	vacuole membrane	vacuole	below threshold	below threshold	New	1	0	6	0	10	33	87.6018	22.3671	147.046	28.5268	#N/A	#N/A	13.95	#N/A	9.5	#N/A	#N/A	42.4	9.9	Bearing Signal Sequence		0	0	0	0	0	0	0	vacuolar membrane:vacuole	vacuolar membrane:vacuole	vacuolar membrane:vacuole	0	#N/A	#N/A	#N/A	ENSG00000166558	01
YBR296C	PHO89	Plasma membrane Na+/Pi cotransporter; active in early growth phase; similar to phosphate transporters of Neurospora crassa; transcription regulated by inorganic phosphate concentrations and Pho4p; mutations in related human transporter genes hPit1 and hPit2 are associated with hyperphosphatemia-induced calcification of vascular tissue and familial idiopathic basal ganglia calcification	01_13_31	1G16	15_D_02	SWAT	ER	ER	below threshold	ER	below threshold	Same	1	0	6	21	11	6	39.1477	17.3853	15.0691	25.1886	#N/A	#N/A	15.04	#N/A	17.3	#N/A	#N/A	11.49	26.2	0		0	0	0	0	0	0	0	cell periphery	cell periphery	0	0	#N/A	#N/A	#N/A	ENSG00000144136	01
YGL186C	TPN1	Plasma membrane pyridoxine (vitamin B6) transporter; member of the purine-cytosine permease subfamily within the major facilitator superfamily; proton symporter with similarity to Fcy21p, Fcy2p, and Fcy22p	01_13_32	2G16	06_G_04	SWAT	vacuole	cell periphery,vacuole	ER,vacuole	ER	below threshold	Different	1	0	0	#N/A	12	88	37.578	26.9406	74.7639	23.2808	#N/A	#N/A	20.58	#N/A	25	38281000	#N/A	67.23	9.4	0		0	0	0	0	0	0	0	cell periphery	cell periphery	0	0	#N/A	1.5	#N/A	0	01
YBL091C-A	SCS22	Protein involved in regulation of phospholipid metabolism; one of 6 proteins (Ist2p, Scs2p, Scs22p, Tcb1p, Tcb2p, Tcb3p) that connect the ER and plasma membrane (PM); regulates PM PI4P levels by controlling access of the Sac1p phosphatase to its substrate, PI4P; human VAP homolog; similar to D. melanogaster inturned protein; SWAT-GFP and mCherry fusion proteins localize to the cytosol; SCS22 has …	01_13_33	1G17	13_A_10	SWAT	cytosol	cytosol	ambiguous	missing	below threshold	New	1	0	0	#N/A	1	155	80.3435	25.9717	146.614	26.4372	#N/A	#N/A	#N/A	#N/A	40.4	#N/A	15	#N/A	11.4	0		0	0	0	0	0	0	0	cellular_component:integral component of membrane:membrane	0	0	0	#N/A	#N/A	#N/A	ENSG00000124164	01
YER120W	SCS2	Integral ER membrane protein, regulates phospholipid metabolism; one of 6 proteins (Ist2p, Scs2p, Scs22p, Tcb1p, Tcb2p, Tcb3p) that connect ER to plasma membrane (PM) and regulate PI4P levels by controlling access of Sac1p phosphatase to substrate PI4P in the PM; interacts with FFAT motifs in Opi1p, Swh1p, Osh2p, and Osh3p; involved in telomeric silencing; VAP homolog; SCS2 has a paralog, SCS22, …	01_13_34	2G17	03_H_06	SWAT	ER	ER	ER	ER	ER	Same	1	0	0	#N/A	1	226	228.617	82.0415	378.241	59.7395	#N/A	#N/A	#N/A	259.5	362.8	22607000000	553	415.3	18.2	Tail Anchored		1	0	0	0	0	0	0	bud neck/tip:endoplasmic reticulum:nuclear membrane:nucleus	bud neck/tip:endoplasmic reticulum:nuclear membrane	endoplasmic reticulum:nuclear membrane:nucleus	0	#N/A	#N/A	#N/A	ENSG00000124164	01
YBR298C	MAL31	Maltose permease; high-affinity maltose transporter (alpha-glucoside transporter); encoded in the MAL3 complex locus; member of the 12 transmembrane domain superfamily of sugar transporters; functional in genomic reference strain S288C	01_13_35	1G18	06_E_12	SWAT	cell periphery,ER	cell periphery,vacuole	below threshold	below threshold	punctate,vacuole membrane	New	2	0	0	#N/A	10	179	104.001	19.1864	164.009	40.9768	#N/A	#N/A	15.18	#N/A	0	#N/A	#N/A	9.14	6.7	0		0	0	0	0	0	0	0	integral component of membrane:membrane	0	0	0	#N/A	#N/A	#N/A	0	01
YGL194C-A	YGL194C-A	Putative protein of unknown function; identified based on comparisons of the genome sequences of six Saccharomyces species; SWAT-GFP and mCherry fusion proteins localize to the endoplasmic reticulum	01_13_36	2G18	10_F_09	SWAT	ER,punctate	ER,vacuole	punctate	missing	below threshold	New	1	0	0	#N/A	1	12	92.4174	17.7218	203.91	26.8912	#N/A	#N/A	#N/A	#N/A	50.2	#N/A	#N/A	#N/A	15.5	0		0	0	0	0	0	0	0	cellular_component:integral component of membrane:membrane	0	0	0	#N/A	#N/A	#N/A	0	01
YBL100C	YBL100C	Dubious open reading frame; unlikely to encode a functional protein, based on available experimental and comparative sequence data; almost completely overlaps the 5' end of ATP1	01_13_37	1G19	03_H_07	SWAT	cytosol,nucleus	vacuole	missing	missing	#N/A	New	1	0	#N/A	#N/A	1	78	50.9339	#N/A	15.1453	#N/A	#N/A	#N/A	#N/A	#N/A	0	#N/A	#N/A	#N/A	#N/A	Tail Anchored		1	0	0	0	0	0	0	0	0	0	0	#N/A	#N/A	#N/A	0	01
YER122C	GLO3	ADP-ribosylation factor GTPase activating protein (ARF GAP); involved in ER-Golgi transport; shares functional similarity with Gcs1p	01_13_38	2G19	09_E_03	SWAT	punctate	cytosol,punctate	below threshold	punctate,punctate	cytosol	Same	1	0	0	#N/A	0	None	125.176	18.8903	152.653	57.4065	#N/A	#N/A	78.09	369.5	115.1	10299000000	56	176.39	9.4	0		0	0	0	0	0	0	0	COPI vesicle:Golgi:endoplasmic reticulum-Golgi intermediate compartment	COPI vesicle:endoplasmic reticulum-Golgi intermediate compartment	Golgi	0	#N/A	#N/A	#N/A	ENSG00000149182	01
YBR301W	PAU24	Cell wall mannoprotein; has similarity to Tir1p, Tir2p, Tir3p, and Tir4p; member of the seripauperin multigene family encoded mainly in subtelomeric regions; expressed under anaerobic conditions, completely repressed during aerobic growth	01_13_39	1G20	28_C_10	SWAT	cytosol,nucleus	below threshold	below threshold	below threshold	below threshold	New	1	0	#N/A	#N/A	0	None	55.002	19.3703	7.47469	24.1707	#N/A	#N/A	14.52	#N/A	0	#N/A	#N/A	#N/A	#N/A	Bearing Signal Sequence		0	0	0	0	0	0	0	cell periphery	cell periphery	cell periphery	0	#N/A	#N/A	#N/A	0	01
YGL198W	YIP4	Protein that interacts with Rab GTPases; localized to late Golgi vesicles; computational analysis of large-scale protein-protein interaction data suggests a possible role in vesicle-mediated transport	01_13_40	2G20	12_A_03	SWAT	punctate	ER,punctate	punctate	below threshold	punctate	New	1	0	0	#N/A	5	89	71.3903	45.5467	41.4544	32.1069	#N/A	#N/A	14.63	#N/A	60	6486000	#N/A	91.31	19.4	0		0	0	0	0	0	0	0	Golgi	Golgi	Golgi	0	#N/A	#N/A	#N/A	0	01
YBL101C	ECM21	Protein involved in regulating endocytosis of plasma membrane proteins; identified as a substrate for ubiquitination by Rsp5p and deubiquitination by Ubp2p; promoter contains several Gcn4p binding elements; ECM21 has a paralog, CSR2, that arose from the whole genome duplication	01_13_41	1G21	09_F_02	SWAT	cytosol	cytosol	below threshold	cytosol	cytosol	Same	1	0	0	#N/A	0	None	68.6793	21.1028	85.9394	42.7123	#N/A	#N/A	#N/A	91	5.7	637980000	68	39.7	7.7	0		0	0	0	0	0	0	0	cytoplasm	0	cytoplasm	cytoplasm	#N/A	#N/A	#N/A	0	01
YER123W	YCK3	Palmitoylated vacuolar membrane-localized casein kinase I isoform; negatively regulates vacuole fusion during hypertonic stress via phosphorylation of Vps41p; shares essential functions with Hrr25p; regulates vesicle fusion in AP-3 pathway	01_13_42	2G21	02_C_05	SWAT	vacuole membrane	vacuole membrane	vacuole membrane	vacuole	vacuole membrane	Different	1	0	0	#N/A	0	None	59.0995	40.2258	76.6577	33.2444	#N/A	#N/A	31.65	138.5	14	999850000	25	46.96	8.1	Palmitoylation		0	0	0	1	0	0	0	cell periphery:nuclear membrane:nucleus:vacuolar membrane:vacuole	cell periphery:nucleus:vacuolar membrane:vacuole	cell periphery:nuclear membrane:nucleus:vacuolar membrane:vacuole	vacuolar membrane	#N/A	#N/A	#N/A	0	01
YBR302C	COS2	Endosomal protein involved in turnover of plasma membrane proteins; member of the DUP380 subfamily of conserved, often subtelomeric COS genes; required for the multivesicular vesicle body sorting pathway that internalizes plasma membrane proteins for degradation; Cos proteins provide ubiquitin in trans for nonubiquitinated cargo proteins	01_13_43	1G22	14_F_03	SWAT	vacuole	vacuole	below threshold	vacuole	below threshold	Same	1	0	#N/A	#N/A	4	47	75.8293	17.0957	96.4378	24.3588	#N/A	#N/A	15.26	#N/A	0	#N/A	8	#N/A	#N/A	0		0	0	0	0	0	0	0	vacuole	0	0	vacuole	#N/A	#N/A	#N/A	0	01
YGL204C	YGL204C	Protein of unknown function; mRNA identified as translated by ribosome profiling data; SWAT-GFP and mCherry fusion proteins localize to the endoplasmic reticulum	01_13_44	2G22	28_D_6	SWAT	ER	ER	below threshold	below threshold	below threshold	New	1	0	0	#N/A	3	22	30.4807	22.1953	10.0356	23.995	#N/A	#N/A	15.93	#N/A	34.8	#N/A	#N/A	#N/A	60.5	0		0	0	0	0	0	0	0	cellular_component:integral component of membrane:membrane	0	0	0	#N/A	#N/A	#N/A	0	01
YBL102W	SFT2	Tetra-spanning membrane protein found mostly in the late Golgi; non-essential; can suppress some sed5 alleles; may be part of the transport machinery, but precise function is unknown; similar to mammalian syntaxin 5	01_13_45	1G23	04_C_06	SWAT	punctate	punctate,vacuole	punctate	punctate	punctate	Same	1	0	0	#N/A	4	81	131.002	54.1986	249.051	46.0298	#N/A	#N/A	26.48	191.5	51.1	#N/A	#N/A	115.37	24	0		0	0	0	0	0	0	0	Golgi	Golgi	Golgi	0	inviable	1	#N/A	ENSG00000173349	01
YER125W	RSP5	NEDD4 family E3 ubiquitin ligase; regulates processes including: MVB sorting, the heat shock response, transcription, endocytosis and ribosome stability; ubiquitinates Sec23p, Sna3p, Ste4p, Nfi1p, Rpo21p and Sem1p; autoubiquitinates; deubiquitinated by Ubp2p; regulated by SUMO ligase Siz1p, in turn regulates Siz1p SUMO ligase activity; required for efficient Golgi-to-ER trafficking in COPI mutant…	01_13_46	2G23	28_A_12	SWAT	cytosol,punctate	cytosol,punctate	punctate	nucleus	cytosol,punctate	Different	1	0	0	#N/A	0	None	109.77	83.9743	173.64	52.4387	#N/A	#N/A	65.56	#N/A	53.9	1713700000	#N/A	207.93	#N/A	0		0	0	0	0	0	0	0	Golgi:actin:bud neck/tip:cell periphery:cytoplasm:cytoskeleton:endosome:mitochondria:nucleus	Golgi:bud neck/tip:cell periphery:cytoplasm:endosome:nucleus	actin:cytoplasm:cytoskeleton:nucleus	cell periphery:mitochondria	inviable	1.5	#N/A	ENSG00000138411	01
YCL001W	RER1	Protein involved in retention of membrane proteins; including Sec12p, in the ER; localized to Golgi; functions as a retrieval receptor in returning membrane proteins to the ER	01_13_47	1G24	04_A_07	SWAT	punctate	vacuole	ER,punctate	punctate	punctate	Same	1	0	0	#N/A	3	62	140.782	71.4248	148.378	46.1398	#N/A	#N/A	31.04	#N/A	142.4	885570000	#N/A	179.06	38.4	0		0	0	0	0	0	0	0	COPI vesicle:COPII vesicle:Golgi:vacuole	COPI vesicle:COPII vesicle:vacuole	Golgi	0	#N/A	#N/A	#N/A	ENSG00000157916	01
YGL205W	POX1	Fatty-acyl coenzyme A oxidase; involved in the fatty acid beta-oxidation pathway; localized to the peroxisomal matrix	01_13_48	2G24	02_D_09	SWAT	punctate	punctate	punctate	below threshold	punctate	New	1	0	0	#N/A	0	None	39.0503	18.8547	57.2977	24.4868	#N/A	#N/A	15.97	#N/A	0.3	#N/A	#N/A	0.46	14.4	Peroxisome	0	0	0	0	0	0	0	0	peroxisome	peroxisome	peroxisome	0	#N/A	#N/A	#N/A	ENSG00000087008	01
Control-Blank	None	#N/A	01_14_01	3G1	#N/A	SWAT	below threshold	missing	missing	#N/A	missing	#N/A	#N/A	0	#N/A	#N/A	#N/A	#N/A	#N/A	#N/A	0	#N/A	#N/A	#N/A	#N/A	#N/A	#N/A	#N/A	#N/A	#N/A	#N/A	#N/A	#N/A	0	0	#N/A	0	0	0	0	#N/A	#N/A	#N/A	#N/A	#N/A	#N/A	#N/A	#N/A	01
YNL090W	RHO2	Non-essential small GTPase of the Rho/Rac family of Ras-like proteins; involved in the establishment of cell polarity and in microtubule assembly	01_14_02	4G1	01_E_01	SWAT	cell periphery	cell periphery,vacuole	cell periphery	nucleus,cytosol	#N/A	Different	1	0	0	#N/A	0	None	80.8876	25.6741	132.472	0	#N/A	#N/A	31.89	#N/A	86.2	257870000	#N/A	83.05	17.5	Farnesylation		0	0	0	1	1	1	0	cell periphery	0	cell periphery	0	#N/A	#N/A	#N/A	0	01
YKR046C	PET10	Protein of unknown function that localizes to lipid particles; localization suggests a role in lipid metabolism; expression pattern suggests a role in respiratory growth; computational analysis of large-scale protein-protein interaction data suggests a role in ATP/ADP exchange	01_14_03	3G2	01_A_12	SWAT	punctate	punctate	punctate	punctate	punctate	Same	1	0	0	#N/A	0	None	170.105	22.9223	170.485	57.1025	#N/A	#N/A	80.53	133	9	3007500000	43	38.78	13.6	Lipid droplet		0	0	0	0	0	0	0	lipid particle	lipid particle	lipid particle	0	#N/A	#N/A	#N/A	0	01
YOL020W	TAT2	High affinity tryptophan and tyrosine permease; overexpression confers FK506 and FTY720 resistance	01_14_04	4G2	02_H_01	SWAT	ER	ER,vacuole	ER	cell periphery,vacuole	below threshold	Different	1	0	0	#N/A	12	87	41.6028	25.8543	39.9192	29.9765	#N/A	#N/A	57.86	298	17.2	#N/A	26	94.69	8.9	Palmitoylation		0	0	0	1	0	0	0	cell periphery	cell periphery	0	0	#N/A	#N/A	#N/A	0	01
YJR044C	VPS55	Late endosomal protein involved in late endosome to vacuole transport; functional homolog of human obesity receptor gene-related protein (OB-RGRP)	01_14_05	3G3	03_A_12	SWAT	punctate,vacuole membrane	ER,vacuole	punctate	punctate	below threshold	Same	2	0	0	#N/A	4	12	87.6079	34.6547	182.895	29.3038	#N/A	#N/A	18.47	#N/A	99.1	#N/A	300	93.51	19.8	0		0	0	0	0	0	0	0	endosome	endosome	endosome	0	#N/A	#N/A	#N/A	ENSG00000213625	01
YNL093W	YPT53	Stress-induced Rab family GTPase; required for vacuolar protein sorting and endocytosis; involved in ionic stress tolerance; similar to Vps21p and Ypt52p; functional homolog of Vps21p; mammalian Rab5 homolog; YPT53 has a paralog, VPS21, that arose from the whole genome duplication	01_14_06	4G3	14_G_08	SWAT	punctate,vacuole membrane	punctate,vacuole	below threshold	below threshold	punctate	New	1	0	0	#N/A	0	None	76.7582	21.0996	123.078	39.8913	#N/A	#N/A	14.6	#N/A	2.2	#N/A	28	0.45	24.2	0		0	0	0	0	0	1	0	cell periphery:endosome	endosome	cell periphery	0	#N/A	#N/A	#N/A	ENSG00000080371	01
YKR050W	TRK2	Component of the Trk1p-Trk2p potassium transport system; contributes to K(+) supply and maintenance of plasma-membrane potential; TRK2 has a paralog, TRK1, that arose from the whole genome duplication	01_14_07	3G4	15_B_02	SWAT	cell periphery	cell periphery,vacuole	below threshold	below threshold	cell periphery,punctate	New	1	0	6	0	11	48	47.3652	14.0356	55.5492	30.0942	#N/A	#N/A	14.9	#N/A	0	#N/A	#N/A	29.67	9.9	Bearing Signal Sequence		0	0	0	0	0	0	0	cell periphery	cell periphery	0	0	#N/A	#N/A	#N/A	0	01
YOL023W	IFM1	Mitochondrial translation initiation factor 2	01_14_08	4G4	15_B_07	Blank	Blank	Blank	Blank	Remove	Remove	Blank	Remove	Remove	Remove	Remove	Remove	Remove	Remove	Remove	Remove	Remove	Remove	Remove	Remove	Remove	Remove	Remove	Remove	Remove	Remove	Remove	Remove	0	0	Remove	0	0	1	0	Remove	Remove	Remove	Remove	Remove	Remove	Remove	Remove	01
YJR054W	KCH1	Potassium transporter that mediates K+ influx; activates high-affinity Ca2+ influx system (HACS) during mating pheromone response; expression up-regulated in response to alpha factor; localized to sites of polarized growth; member of a fungal-specific gene family; potential Cdc28p substrate; KCH1 has a paralog, PRM6, that arose from the whole genome duplication	01_14_09	3G5	12_A_12	SWAT	punctate	vacuole	below threshold	vacuole	below threshold	Different	1	0	0	#N/A	3	31	41.2044	17.2882	61.8055	25.2817	#N/A	#N/A	17.48	#N/A	4.4	#N/A	#N/A	33.17	13.8	0		0	0	0	0	0	0	0	cell periphery:vacuolar membrane:vacuole	cell periphery	vacuolar membrane:vacuole	vacuole	#N/A	2.5	#N/A	0	01
YNL095C	YNL095C	Putative protein of unknown function; predicted to contain a transmembrane domain; not an essential gene; YNL095C has a paralog, ECM3, that arose from the whole genome duplication	01_14_10	4G5	06_A_10	SWAT	ER	ER	below threshold	ER	below threshold	Same	1	0	0	#N/A	10	20	43.7066	15.8911	21.1219	24.7325	#N/A	#N/A	14.07	#N/A	4.9	#N/A	83	25.6	7.5	0		0	0	0	0	0	0	0	integral component of membrane:membrane	0	0	0	#N/A	#N/A	#N/A	0	01
Control-his3d-SWAT	None	#N/A	01_14_11	3G6	#N/A	SWAT	cytosol	cytosol	below threshold	#N/A	missing	#N/A	#N/A	0	#N/A	#N/A	#N/A	#N/A	222.489	16.7882	204.354	33.9346	#N/A	#N/A	#N/A	#N/A	#N/A	#N/A	#N/A	#N/A	#N/A	#N/A	#N/A	0	0	#N/A	0	0	0	0	#N/A	#N/A	#N/A	#N/A	#N/A	#N/A	#N/A	#N/A	01
Control-his3d-SWAT	None	#N/A	01_14_12	4G6	#N/A	SWAT	cytosol	cytosol	below threshold	#N/A	missing	#N/A	#N/A	0	#N/A	#N/A	#N/A	#N/A	240.174	12.5078	144.218	33.0966	#N/A	#N/A	#N/A	#N/A	#N/A	#N/A	#N/A	#N/A	#N/A	#N/A	#N/A	0	0	#N/A	0	0	0	0	#N/A	#N/A	#N/A	#N/A	#N/A	#N/A	#N/A	#N/A	01
YJR058C	APS2	Small subunit of the clathrin-associated adaptor complex AP-2; AP-2 is involved in protein sorting at the plasma membrane; related to the sigma subunit of the mammalian plasma membrane clathrin-associated protein (AP-2) complex	01_14_13	3G7	10_C_02	SWAT	punctate,bud neck,nucleus	punctate,bud neck,nucleus	missing	bud neck,cell periphery	below threshold	Same	3	0	0	#N/A	0	None	40.4728	15.8225	17.0491	24.0536	#N/A	#N/A	17.32	#N/A	59.4	#N/A	145	66.96	33	0		0	0	0	0	0	0	0	cell periphery:endosome	endosome	cell periphery:endosome	0	#N/A	#N/A	#N/A	0	01
YNL098C	RAS2	GTP-binding protein; regulates nitrogen starvation response, sporulation, and filamentous growth; farnesylation and palmitoylation required for activity and localization to plasma membrane; homolog of mammalian Ras proto-oncogenes; RAS2 has a paralog, RAS1, that arose from the whole genome duplication	01_14_14	4G7	01_H_01	SWAT	cell periphery	cell periphery	below threshold	nucleus,cytosol	cell periphery	Different	1	0	0	#N/A	0	None	141.872	19.5523	153.949	59.0505	#N/A	#N/A	#N/A	#N/A	113.1	11820000000	25	#N/A	9.4	Farnesylation		0	0	0	1	1	1	0	cell periphery:endoplasmic reticulum:mitochondria:nucleus	cell periphery:endoplasmic reticulum:mitochondria:nucleus	cell periphery	cell periphery	#N/A	#N/A	#N/A	ENSG00000006451	01
Control-his3d-GFPdC	None	#N/A	01_14_15	3G8	#N/A	SWAT	below threshold	below threshold	below threshold	#N/A	missing	#N/A	#N/A	0	#N/A	#N/A	#N/A	#N/A	12.0558	12.7793	0	#N/A	#N/A	#N/A	#N/A	#N/A	#N/A	#N/A	#N/A	#N/A	#N/A	#N/A	#N/A	0	0	#N/A	0	0	0	0	#N/A	#N/A	#N/A	#N/A	#N/A	#N/A	#N/A	#N/A	01
Control-his3d-GFPdC	None	#N/A	01_14_16	4G8	#N/A	SWAT	below threshold	below threshold	below threshold	#N/A	missing	#N/A	#N/A	0	#N/A	#N/A	#N/A	#N/A	12.6677	19.5436	#N/A	23.7392	#N/A	#N/A	#N/A	#N/A	#N/A	#N/A	#N/A	#N/A	#N/A	#N/A	#N/A	0	0	#N/A	0	0	0	0	#N/A	#N/A	#N/A	#N/A	#N/A	#N/A	#N/A	#N/A	01
YJR066W	TOR1	PIK-related protein kinase and rapamycin target; subunit of TORC1, a complex that controls growth in response to nutrients by regulating translation, transcription, ribosome biogenesis, nutrient transport and autophagy; involved in meiosis; TOR1 has a paralog, TOR2, that arose from the whole genome duplication	01_14_17	3G9	13_G_04	SWAT	cytosol,punctate,vacuole membrane	punctate,vacuole membrane	below threshold	below threshold	below threshold	New	2	0	0	#N/A	1	1133	48.3635	15.2467	22.3735	27.9893	#N/A	#N/A	14.18	#N/A	3.2	1039600000	5	49.31	7.4	0		0	0	0	0	0	0	0	Golgi:cell periphery:cytoplasm:endosome:nucleus:vacuolar membrane:vacuole	Golgi:cell periphery:cytoplasm:endosome:nucleus:vacuolar membrane	cell periphery:vacuolar membrane:vacuole	0	#N/A	#N/A	#N/A	ENSG00000261740	01
YLR293C	GSP1	Ran GTPase; GTP binding protein (mammalian Ranp homolog) involved in the maintenance of nuclear organization, RNA processing and transport; regulated by Srm1p, Rna1p, Yrb1p, Yrb2p, Yrp4p, Yrb30p, Cse1p and Kap95p; GSP1 has a paralog, GSP2, that arose from the whole genome duplication	01_14_18	4G9	05_H_12	SWAT	below threshold	missing	missing	missing	#N/A	New	1	0	0	#N/A	0	None	15.1952	#N/A	#N/A	#N/A	#N/A	#N/A	#N/A	#N/A	1433	66125000000	#N/A	1476.66	39.7	ActiveX VT_ERROR:	ActiveX VT_ERROR:	0	0	ActiveX VT_ERROR:	0	0	0	0	ActiveX VT_ERROR:	ActiveX VT_ERROR:	ActiveX VT_ERROR:	ActiveX VT_ERROR:	#N/A	2.5	#N/A	ENSG00000132341	01
Control-URA+	None	#N/A	01_14_19	3G10	#N/A	SWAT	below threshold	missing	missing	#N/A	#N/A	#N/A	#N/A	0	#N/A	#N/A	#N/A	#N/A	12.4069	#N/A	#N/A	#N/A	#N/A	#N/A	#N/A	#N/A	#N/A	#N/A	#N/A	#N/A	#N/A	#N/A	#N/A	0	0	#N/A	0	0	0	0	#N/A	#N/A	#N/A	#N/A	#N/A	#N/A	#N/A	#N/A	01
Control-URA+	None	#N/A	01_14_20	4G10	#N/A	SWAT	below threshold	missing	missing	#N/A	#N/A	#N/A	#N/A	0	#N/A	#N/A	#N/A	#N/A	14.3652	0	#N/A	#N/A	#N/A	#N/A	#N/A	#N/A	#N/A	#N/A	#N/A	#N/A	#N/A	#N/A	#N/A	0	0	#N/A	0	0	0	0	#N/A	#N/A	#N/A	#N/A	#N/A	#N/A	#N/A	#N/A	01
YJR072C	NPA3	Member of the conserved GPN-loop GTPase family; has a role in transport of RNA polymerase II to the nucleus; exhibits GTP-dependent binding to PolII; has ATPase activity; involved in sister chromatid cohesion; phosphorylated by the Pcl1p-Pho85p kinase complex; human homolog XAB1 interacts with human RNA polymerase II; protein abundance increases in response to DNA replication stress	01_14_21	3G11	15_E_12	SWAT	cytosol	cytosol	cytosol	cytosol	cytosol	Same	1	0	0	#N/A	0	None	157.837	63.9201	267.764	49.3394	#N/A	#N/A	73.03	236.5	80.7	1294600000	141	120.29	13.7	0		0	0	0	0	0	1	0	cytoplasm	0	cytoplasm	cytoplasm	inviable	#N/A	#N/A	ENSG00000198522	01
YNL111C	CYB5	Cytochrome b5; involved in the sterol and lipid biosynthesis pathways; acts as an electron donor to support sterol C5-6 desaturation	01_14_22	4G11	03_E_06	SWAT	ER	ER	ER	ER	ER	Same	1	0	0	#N/A	1	100	73.1946	41.5371	104.191	36.3628	#N/A	#N/A	#N/A	108.6	309.1	818790000	73	172.25	46.7	Tail Anchored		1	0	0	0	0	0	0	endoplasmic reticulum	endoplasmic reticulum	endoplasmic reticulum	0	#N/A	#N/A	#N/A	ENSG00000166347	01
YKR051W	YKR051W	Putative protein of unknown function	01_14_23	3G12	28_F_4	SWAT	ambiguous	ER,vacuole	below threshold	missing	below threshold	New	1	0	0	#N/A	7	15	15.1254	20.4473	7.9492	23.1095	#N/A	#N/A	#N/A	#N/A	5.5	#N/A	#N/A	22.25	10.4	0		0	0	0	0	0	0	0	integral component of membrane:membrane	0	0	0	#N/A	#N/A	#N/A	ENSG00000198792	01
YOL044W	PEX15	Tail-anchored type II integral peroxisomal membrane protein; required for peroxisome biogenesis; cells lacking Pex15p mislocalize peroxisomal matrix proteins to cytosol; overexpression results in impaired peroxisome assembly	01_14_24	4G12	02_D_06	SWAT	punctate	punctate	punctate	punctate	punctate	Same	1	0	0	#N/A	1	332	56.983	22.7372	49.6512	27.789	#N/A	#N/A	#N/A	#N/A	9.8	845580000	143	16.58	24.4	Peroxisome	Pex19 signal (by Peroxisomes DB)	0	0	0	0	0	0	0	endoplasmic reticulum:peroxisome	peroxisome	endoplasmic reticulum:peroxisome	0	#N/A	#N/A	#N/A	0	01
YJR073C	OPI3	Methylene-fatty-acyl-phospholipid synthase; catalyzes the last two steps in phosphatidylcholine biosynthesis; also known as phospholipid methyltransferase	01_14_25	3G13	14_B_07	SWAT	ER,punctate	ER,vacuole	punctate,ER	ER,vacuole	below threshold	Same	3	0	0	#N/A	3	23	74.5695	63.0103	97.5676	22.6913	#N/A	#N/A	29.3	576	27.8	23803000	203	78.6	17.2	0		0	0	KKxx	0	0	0	0	endoplasmic reticulum:mitochondria	0	endoplasmic reticulum	mitochondria	#N/A	#N/A	#N/A	ENSG00000133027	01
YNL115C	YNL115C	Putative protein of unknown function; green fluorescent protein (GFP)-fusion protein localizes to mitochondria; YNL115C is not an essential gene	01_14_26	4G13	28_H_4	SWAT	vacuole membrane	punctate,vacuole membrane	vacuole membrane	vacuole	punctate,nuclear periphery	Different	2	0	0	#N/A	5	80	138.125	21.4538	118.609	34.39	#N/A	#N/A	14.97	#N/A	10	74104000	#N/A	33.09	10.8	0		0	0	0	0	0	0	0	vacuolar membrane:vacuole	0	vacuolar membrane:vacuole	vacuole	#N/A	#N/A	#N/A	0	01
YKR053C	YSR3	Dihydrosphingosine 1-phosphate phosphatase; membrane protein involved in sphingolipid metabolism; YSR3 has a paralog, LCB3, that arose from the whole genome duplication	01_14_27	3G14	07_D_10	SWAT	punctate	vacuole	below threshold	below threshold	below threshold	New	1	0	0	#N/A	7	82	38.9774	17.9789	43.5016	25.0454	#N/A	#N/A	16.75	#N/A	0.3	#N/A	#N/A	16.08	18.1	0		0	0	0	0	0	0	0	endoplasmic reticulum	endoplasmic reticulum	endoplasmic reticulum	0	#N/A	#N/A	#N/A	ENSG00000126821	01
YOL047C	LDS2	Protein Involved in spore wall assembly; localizes to lipid droplets found on or outside of the prospore membrane; shares similarity with Lds1p and Rrt8p, and a strain mutant for all 3 genes exhibits reduced dityrosine fluorescence relative to the single mutants; green fluorescent protein (GFP)-fusion protein localizes to the cytoplasm in a punctate pattern	01_14_28	4G14	04_E_05	SWAT	punctate	punctate	below threshold	punctate	punctate	Same	1	0	0	#N/A	4	92	30.9903	19.0915	46.0063	38.5425	#N/A	#N/A	21.15	#N/A	0	#N/A	35	0.83	6.5	0		0	0	0	0	0	0	0	cytoplasm:lipid particle	0	cytoplasm	cytoplasm:lipid particle	#N/A	#N/A	#N/A	0	01
YJR076C	CDC11	Component of the septin ring that is required for cytokinesis; present at the ends of rod-like septin hetero-oligomers; C-terminal extension is important for recruitment of Bni5p to the mother-bud neck, which in turn is required for Myo1p recruitment and cytokinesis; septin rings at the mother-bud neck act as scaffolds for recruiting cell division factors and as barriers to prevent diffusion of s…	01_14_29	3G15	10_B_07	SWAT	bud neck	bud neck	bud neck	bud neck,cell periphery	bud neck	Same	1	0	0	#N/A	0	None	101.448	30.9389	219.204	50.4349	#N/A	#N/A	NA	#N/A	53.6	2490900000	62	112.66	9.7	0		0	0	0	0	0	0	0	bud neck/tip:microtubule:spindle pole body	bud neck/tip:microtubule:spindle pole body	bud neck/tip	0	inviable	3	#N/A	0	01
YNL117W	MLS1	Malate synthase, enzyme of the glyoxylate cycle; involved in utilization of non-fermentable carbon sources; expression is subject to carbon catabolite repression; localizes in peroxisomes during growth on oleic acid, otherwise cytosolic; can accept butyryl-CoA as acyl-CoA donor in addition to traditional substrate acetyl-CoA	01_14_30	4G15	03_B_02	SWAT	cytosol,punctate	cytosol,punctate	punctate	missing	cytosol	New	2	0	0	#N/A	0	None	183.28	21.3841	191.933	65.5253	#N/A	#N/A	#N/A	#N/A	0.2	#N/A	#N/A	1.24	18.4	Peroxisome	predicted PTS1 (by Peroxisome DB)	0	0	0	0	0	0	1	cytoplasm:peroxisome	cytoplasm:peroxisome	peroxisome	cytoplasm	#N/A	#N/A	#N/A	0	01
YKR055W	RHO4	Non-essential small GTPase; member of the Rho/Rac subfamily of Ras-like proteins; likely to be involved in the establishment of cell polarity; has long N-terminal extension that plays an important role in Rho4p function and is shared with Rho4 homologs in other yeasts and filamentous fungi	01_14_31	3G16	01_F_03	SWAT	cell periphery,ER,bud neck	ER,bud neck	below threshold	nucleus,cytosol	cytosol	Different	3	0	0	#N/A	0	None	69.1359	22.3684	100.352	44.4134	#N/A	#N/A	18	#N/A	17.8	118050000	#N/A	23.34	9.7	Farnesylation		0	0	0	0	1	1	0	bud neck/tip:cell periphery	bud neck/tip:cell periphery	cell periphery	0	#N/A	#N/A	#N/A	0	01
YOL048C	RRT8	Protein involved in spore wall assembly; shares similarity with Lds1p and Lds2p and a strain mutant for all 3 genes exhibits reduced dityrosine fluorescence relative to the single mutants; identified in a screen for mutants with increased levels of rDNA transcription; green fluorescent protein (GFP)-fusion protein localizes to lipid particles; protein abundance increases in response to DNA replic…	01_14_32	4G16	01_A_09	SWAT	punctate	punctate	punctate	punctate	punctate	Same	1	0	0	#N/A	4	110	59.539	22.468	61.4163	44.4826	#N/A	#N/A	24.08	117.2	3.9	#N/A	112	26.33	16	Lipid droplet		0	0	0	0	0	0	0	lipid particle	0	lipid particle	lipid particle	#N/A	#N/A	#N/A	0	01
YJR086W	STE18	G protein gamma subunit; forms a dimer with Ste4p to activate the mating signaling pathway, forms a heterotrimer with Gpa1p and Ste4p to dampen signaling; C-terminus is palmitoylated and farnesylated, which are required for normal signaling	01_14_33	3G17	01_B_02	SWAT	cell periphery,punctate	cell periphery,vacuole	cell periphery,punctate	cytosol,punctate	below threshold	Different	1	0	0	#N/A	0	None	64.0829	46.6103	77.6335	25.031	#N/A	#N/A	#N/A	207.5	223.3	456620000	#N/A	110.96	11.3	Farnesylation		0	0	0	1	1	0	0	cell periphery:cytoplasm	cell periphery:cytoplasm	0	0	#N/A	#N/A	#N/A	0	01
YNL125C	ESBP6	Protein with similarity to monocarboxylate permeases; appears not to be involved in transport of monocarboxylates such as lactate, pyruvate or acetate across the plasma membrane	01_14_34	4G17	05_F_11	SWAT	cell periphery	cell periphery,vacuole	below threshold	ER	ambigous	Different	1	0	0	#N/A	11	210	60.846	20.2071	44.8647	31.2862	#N/A	#N/A	22.5	#N/A	3.1	92693000	#N/A	23.47	8.8	0		0	0	0	0	0	0	0	endoplasmic reticulum:mitochondria	mitochondria	endoplasmic reticulum	endoplasmic reticulum	#N/A	#N/A	#N/A	0	01
YKR067W	GPT2	Glycerol-3-phosphate/dihydroxyacetone phosphate sn-1 acyltransferase; located in lipid particles and the ER; involved in the stepwise acylation of glycerol-3-phosphate and dihydroxyacetone in lipid biosynthesis; the most conserved motifs and functionally relevant residues are oriented towards the ER lumen	01_14_35	3G18	01_A_08	SWAT	ER	ER	ER	ER	ER	Same	1	0	0	#N/A	4	31	47.318	27.3271	84.8813	36.9611	#N/A	#N/A	31	195.2	12.6	1894300000	24	55.04	8.3	Lipid droplet		0	0	0	0	0	0	0	cytoplasm:endoplasmic reticulum:lipid particle	endoplasmic reticulum:lipid particle	0	cytoplasm:endoplasmic reticulum	#N/A	#N/A	#N/A	0	01
YOL053W	AIM39	Protein of unknown function; null mutant displays elevated frequency of mitochondrial genome loss	01_14_36	4G18	13_F_08	SWAT	cytosol,punctate	punctate	below threshold	below threshold	below threshold	New	2	0	0	#N/A	1	157	33.518	18.9725	8.97075	23.6489	#N/A	#N/A	15.53	#N/A	5	3315900	#N/A	21.68	13.5	0		0	0	0	0	0	0	0	mitochondria	0	mitochondria	0	#N/A	#N/A	#N/A	0	01
YJR088C	EMC2	Member of conserved ER transmembrane complex; required for efficient folding of proteins in the ER; null mutant displays induction of the unfolded protein response; homologous to worm Y57G7A.10/EMC-2, fly CG17556, human TTC35	01_14_37	3G19	09_C_10	SWAT	ER	nuclear periphery	ER	ER	cytosol	Different	1	0	0	#N/A	0	None	130.916	64.6828	112.645	33.1743	#N/A	#N/A	69.53	404	103.1	2388200000	300	118.49	13.3	0		0	0	0	0	0	0	0	endoplasmic reticulum	endoplasmic reticulum	endoplasmic reticulum	endoplasmic reticulum	#N/A	#N/A	#N/A	0	01
YNL127W	FAR11	Protein involved in recovery from cell cycle arrest; acts in response to pheromone; also involved in regulation of intra-S DNA damage checkpoint and autophagy; is essential for dephosphorylation of Atg13p; interacts with Far3p, Far7p, Far8p, Far9p, Far10p and with the phosphatases Pph21p, Pph22p and Pph3p; has similarity to the N- and C-termini of N. crassa HAM-2; similar to human Fam40A and Fam4…	01_14_38	4G19	10_B_01	SWAT	cytosol	missing	punctate,mitochondria	cytosol	cytosol	Same	1	0	0	#N/A	0	None	53.3839	22.4511	#N/A	36.2424	#N/A	#N/A	22.11	#N/A	4.8	141090000	84	31.71	8.4	0		0	0	0	0	0	0	0	Golgi:endoplasmic reticulum	Golgi:endoplasmic reticulum	0	0	#N/A	#N/A	#N/A	ENSG00000128578	01
YKR068C	BET3	Core component of transport protein particle (TRAPP) complexes I-III; TRAPP complexes are related multimeric guanine nucleotide-exchange factors for the GTPase Ypt1, regulating ER-Golgi traffic (TRAPPI), intra-Golgi traffic (TRAPPII), endosome-Golgi traffic (TRAPPII and III) and autophagy (TRAPPIII); hydrophilic homodimeric protein that acts in conjunction with SNARE proteins in targeting and fus…	01_14_39	3G20	02_B_05	SWAT	cytosol,punctate	cytosol,punctate	punctate	punctate	below threshold	Same	2	0	0	#N/A	0	None	101.219	45.829	104.96	35.6992	#N/A	#N/A	36.91	89	76.2	1457600000	44	98.17	16.7	Palmitoylation		0	0	0	1	0	0	0	Golgi:autophagosome:endoplasmic reticulum	Golgi	Golgi:autophagosome:endoplasmic reticulum	0	inviable	#N/A	#N/A	ENSG00000054116	01
YOL060C	MAM3	Protein required for normal mitochondrial morphology; has similarity to hemolysins	01_14_40	4G20	08_B_03	SWAT	ER	ER	below threshold	vacuole membrane	below threshold	Different	1	0	0	#N/A	5	21	47.7164	19.5977	15.0022	23.0616	#N/A	#N/A	36.72	123.2	5.9	462060000	8	50.89	8.1	0		0	0	0	0	0	0	0	vacuolar membrane:vacuole	0	vacuolar membrane:vacuole	vacuolar membrane	#N/A	#N/A	#N/A	ENSG00000168763	01
YJR102C	VPS25	Component of the ESCRT-II complex; ESCRT-II is involved in ubiquitin-dependent sorting of proteins into the endosome	01_14_41	3G21	09_G_10	SWAT	cytosol	cytosol	below threshold	below threshold	cytosol	New	1	0	0	#N/A	0	None	112.801	16.5428	237.376	48.047	#N/A	#N/A	17.5	#N/A	18.3	#N/A	#N/A	23.39	34.4	0		0	0	0	0	0	0	0	cytoplasm:endosome	endosome	cytoplasm:endosome	0	#N/A	#N/A	#N/A	ENSG00000131475	01
YNL142W	MEP2	Ammonium permease involved in regulation of pseudohyphal growth; belongs to a ubiquitous family of cytoplasmic membrane proteins that transport only ammonium (NH4+); expression is under the nitrogen catabolite repression regulation	01_14_42	4G21	05_D_12	SWAT	ER,punctate	vacuole	below threshold	cell periphery	below threshold	Different	1	0	0	#N/A	11	32	57.169	17.8268	27.5978	23.6986	#N/A	#N/A	38.37	#N/A	2.1	172540000	#N/A	10.06	13.5	0		0	0	0	0	0	0	0	cell periphery	cell periphery	0	0	#N/A	#N/A	34	0	01
YKR084C	HBS1	GTPase with similarity to translation release factors; together with binding partner Dom34p, facilitates ribosomal subunit dissociation and peptidyl-tRNA release when translation is stalled, particularly in 3' UTRs; genetically implicated in mRNA no-go decay; HBS1 has a paralog, SKI7, that arose from the whole genome duplication	01_14_43	3G22	15_A_07	SWAT	cytosol	cytosol	cytosol	cytosol	cytosol	Same	1	0	0	#N/A	0	None	127.828	37.6487	313.868	63.8729	#N/A	#N/A	15.62	141.5	33.3	1567500000	43	86.67	10.6	0		0	0	0	0	0	1	0	cytoplasm	0	cytoplasm	cytoplasm	#N/A	#N/A	#N/A	0	01
YOL062C	APM4	Cargo-binding mu subunit of AP-2; AP-2 is a heterotetrameric endocytic cargo-binding adaptor that facilitates uptake of membrane proteins during clathrin-mediated endocytosis; Apm4p is required for AP-2 function and localization, and binds cell wall stress receptor Mid2p; AP-2 is required for cell polarity responses to pheromone, nutritional status and cell wall damage in S. cerevisiae, and for h…	01_14_44	4G22	13_B_02	SWAT	cytosol	cytosol	punctate,bud neck	bud neck,cell periphery	cytosol	Different	1	0	0	#N/A	0	None	83.9117	23.1141	86.5227	45.3697	#N/A	#N/A	15.52	#N/A	9.6	209830000	2	68.56	14	0		0	0	0	0	0	0	0	endosome	0	endosome	0	#N/A	#N/A	#N/A	0	01
YJR106W	ECM27	Protein involved in calcium homeostasis and exit from quiescence; required for proper trehalose levels during quiescence; may play a role in cell wall biosynthesis, mutants are hypersensitive to antifungal, Papulacandin B; null mutants have increased plasmid loss; interacts with Pdr5p	01_14_45	3G23	06_H_01	SWAT	ER	ER	below threshold	below threshold	below threshold	New	1	0	0	#N/A	13	21	23.8926	18.6031	11.1026	23.6304	#N/A	#N/A	16.16	#N/A	1.8	#N/A	#N/A	15.41	7.7	0		0	0	0	0	0	0	0	integral component of membrane:membrane	0	0	0	#N/A	#N/A	#N/A	0	01
YNL143C	YNL143C	Protein of unknown function; expressed at both mRNA and protein levels	01_14_46	4G23	28_F_8	SWAT	below threshold	below threshold	mitochondria	nucleus,cytosol	#N/A	C terminal	1	0	0	#N/A	2	12	17.1658	18.7967	5.20392	23.0842	#N/A	#N/A	#N/A	269.1	43.3	#N/A	37	#N/A	14.8	0		0	0	0	0	0	0	0	cellular_component:integral component of membrane:membrane	0	0	0	#N/A	#N/A	#N/A	0	01
YKR088C	TVP38	Integral membrane protein; localized to late Golgi vesicles along with the v-SNARE Tlg2p; required for asymmetric localization of Kar9p during mitosis; GFP-fusion protein localizes to the cytoplasm in a punctate pattern	01_14_47	3G24	04_E_07	SWAT	punctate	punctate	punctate	punctate,punctate,punctate,punctate	punctate	Same	1	0	0	#N/A	5	92	113.613	35.6464	216.081	63.3782	#N/A	#N/A	41.26	171	29.8	#N/A	98	67.47	34.1	0		0	0	0	0	0	0	0	Golgi:cytoplasm	Golgi	Golgi	cytoplasm	#N/A	#N/A	#N/A	0	01
YOL065C	INP54	Phosphatidylinositol 4,5-bisphosphate 5-phosphatase; role in secretion; localizes to the endoplasmic reticulum via the C-terminal tail; lacks the Sac1 domain and proline-rich region found in the other 3 INP proteins	01_14_48	4G24	09_B_06	SWAT	vacuole membrane	vacuole membrane	below threshold	cytosol	vacuole membrane	Different	1	0	0	#N/A	1	367	85.7666	19.8522	124.887	35.6656	#N/A	#N/A	20.35	#N/A	13.4	#N/A	14	23.71	17.7	0		0	0	0	0	0	0	0	endoplasmic reticulum	endoplasmic reticulum	endoplasmic reticulum	0	#N/A	#N/A	#N/A	0	01
YDL195W	SEC31	Component of the Sec13p-Sec31p complex of the COPII vesicle coat; COPII coat is required for vesicle formation in ER to Golgi transport; mutant has increased aneuploidy tolerance	01_15_01	1H1	11_E_05	SWAT	punctate	punctate	cytosol,nucleus	ER to punctate	below threshold	Same	1	0	0	#N/A	0	None	146.417	25.0169	180.197	24.8398	#N/A	#N/A	#N/A	1173	72.9	47225000000	26	225.31	#N/A	0		0	0	0	0	0	0	0	COPII vesicle:endoplasmic reticulum	COPII vesicle	COPII vesicle:endoplasmic reticulum	0	inviable	#N/A	#N/A	ENSG00000075826	01
YGR281W	YOR1	Plasma membrane ATP-binding cassette (ABC) transporter; multidrug transporter mediates export of many different organic anions including oligomycin; homolog of human cystic fibrosis transmembrane receptor (CFTR)	01_15_02	2H1	05_F_12	SWAT	cell periphery	cell periphery,vacuole	cell periphery	cell periphery	below threshold	Same	1	0	0	#N/A	12	107	80.9159	31.611	74.4337	28.5839	#N/A	#N/A	32.72	#N/A	8.6	843010000	65	112.76	8.9	0		0	0	0	0	0	0	0	cell periphery	cell periphery	0	0	#N/A	#N/A	#N/A	0	01
YDR326C	YSP2	Sterol-binding protein; has a probable role in retrograde transport of sterols from the plasma membrane to the ER; contains two StART-like domains that bind sterols and a GRAM domain; co-localizes to puncta in the cortical ER with Sip3p; one of six StART-like domain-containing proteins in yeast that may be involved in sterol transfer between intracellular membranes; conserved across eukaryotes	01_15_03	1H2	13_G_05	SWAT	cell periphery,punctate	cell periphery,punctate	cell periphery,punctate	ambiguous	below threshold	New	2	0	0	#N/A	1	1281	39.8787	25.1303	15.6098	26.3162	#N/A	#N/A	#N/A	#N/A	13.5	793900000	#N/A	72.83	7.1	0		0	0	0	0	0	0	0	cytoplasm:mitochondria	mitochondria	mitochondria	cytoplasm	#N/A	#N/A	#N/A	ENSG00000175318	01
YIL089W	YIL089W	Protein of unknown function found in the ER and vacuole lumen; overexpression of YIL089W affects endocytic protein trafficking	01_15_04	2H2	13_F_05	SWAT	punctate,vacuole	vacuole	below threshold	below threshold	below threshold	New	2	0	0	#N/A	3	61	41.0386	18.1588	59.3997	23.4354	#N/A	#N/A	17	#N/A	5.5	#N/A	3	5.76	18.5	0		0	0	0	0	0	0	0	endoplasmic reticulum:vacuole	endoplasmic reticulum:vacuole	0	0	#N/A	3.5	#N/A	0	01
YDL199C	YDL199C	Putative transporter; member of the sugar porter family	01_15_05	1H3	06_A_01	SWAT	vacuole membrane	vacuole membrane	below threshold	below threshold	punctate,vacuole membrane	New	1	0	0	#N/A	11	118	48.6648	21.3333	64.8712	41.7241	#N/A	#N/A	18.5	#N/A	0.7	#N/A	#N/A	8.02	9.6	0		0	0	0	0	0	0	0	integral component of membrane:membrane	0	0	0	#N/A	#N/A	#N/A	0	01
YGR284C	ERV29	Protein localized to COPII-coated vesicles; involved in vesicle formation and incorporation of specific secretory cargo; protein abundance increases in response to DNA replication stress	01_15_06	2H3	04_F_09	SWAT	ER,punctate	ER,punctate	punctate	ER	ER	Same	2	0	0	#N/A	7	108	205.363	40.8995	290.857	63.1061	#N/A	#N/A	69.62	628	121	228930000	46	235.91	53.9	0		0	0	KxKxx	0	0	0	0	COPII vesicle:endoplasmic reticulum	COPII vesicle	endoplasmic reticulum	0	#N/A	2.5	#N/A	ENSG00000148248	01
YDR329C	PEX3	Peroxisomal membrane protein (PMP); required for proper localization and stability of PMPs; anchors peroxisome retention factor Inp1p at the peroxisomal membrane; interacts with Pex19p	01_15_07	1H4	02_D_08	SWAT	punctate	punctate	punctate	punctate	below threshold	Same	1	0	0	#N/A	1	18	59.8326	16.7508	59.5896	25.9181	#N/A	#N/A	22.18	#N/A	10.9	#N/A	2	42.52	9.1	Peroxisome	0	0	0	0	0	0	0	0	endoplasmic reticulum:peroxisome	endoplasmic reticulum:peroxisome	peroxisome	0	#N/A	#N/A	#N/A	0	01
YIL090W	ICE2	Integral ER membrane protein with type-III transmembrane domains; required for maintenance of ER zinc homeostasis; necessary for efficient targeting of Trm1p tRNA methyltransferase to inner nuclear membrane; mutations cause defects in cortical ER morphology in both the mother and daughter cells	01_15_08	2H4	15_D_05	SWAT	ER	ER	below threshold	ER	ER	Same	1	0	6	0	7	41	62.876	20.5166	86.7693	34.5762	#N/A	#N/A	45.58	187.5	11.5	19826000	34	62.24	13	Bearing Signal Sequence		0	0	0	0	0	0	0	endoplasmic reticulum	endoplasmic reticulum	endoplasmic reticulum	endoplasmic reticulum	#N/A	#N/A	#N/A	0	01
YDL204W	RTN2	Reticulon protein; involved in nuclear pore assembly and maintenance of tubular ER morphology; promotes membrane curvature; regulates the ER asymmetry-induced inheritance block during ER stress; role in ER-derived peroxisomal biogenesis; interacts with Sec6p, Yip3p, and Sbh1p; less abundant than RTN1; member of RTNLA (reticulon-like A) subfamily; protein increases in abundance and relocalizes to …	01_15_09	1H5	08_H_07	SWAT	cell periphery	cell periphery,punctate	below threshold	ER	cell periphery,punctate	Different	1	0	0	#N/A	2	59	129.769	24.0913	173.285	58.6751	#N/A	#N/A	38.69	#N/A	0.6	562840000	193	15.03	10.2	0		0	0	0	0	0	0	0	cytoplasm:endoplasmic reticulum:nucleus	endoplasmic reticulum	endoplasmic reticulum	cytoplasm:endoplasmic reticulum:nucleus	#N/A	#N/A	#N/A	0	01
YGR289C	MAL11	High-affinity maltose transporter (alpha-glucoside transporter); inducible; encoded in the MAL1 complex locus; broad substrate specificity that includes maltotriose; required for isomaltose utilization	01_15_10	2H5	06_D_07	SWAT	cell periphery,vacuole	vacuole	below threshold	below threshold	punctate	New	2	0	0	#N/A	12	106	76.3023	15.1416	114.222	29.0891	#N/A	#N/A	16.72	#N/A	0	#N/A	#N/A	7.51	9	0		0	0	0	0	0	0	0	cell periphery	cell periphery	0	0	#N/A	#N/A	#N/A	0	01
YDR338C	YDR338C	Putative protein of unknown function; member of the multi-drug and toxin extrusion (MATE) family of the multidrug/oligosaccharidyl-lipid/polysaccharide (MOP) exporter superfamily	01_15_11	1H6	06_C_06	SWAT	vacuole membrane	vacuole membrane	punctate	ambiguous	below threshold	New	1	0	0	#N/A	8	312	37.6705	24.0787	59.0517	28.7869	#N/A	#N/A	18.44	#N/A	9	#N/A	18	18.13	12.6	0		0	0	0	0	0	0	0	integral component of membrane:membrane	0	0	0	#N/A	#N/A	#N/A	ENSG00000142494	01
YIL095W	PRK1	Protein serine/threonine kinase; regulates the organization and function of the actin cytoskeleton and reduces endocytic ability of cell through the phosphorylation of the Pan1p-Sla1p-End3p protein complex; PRK1 has a paralog, ARK1, that arose from the whole genome duplication	01_15_12	2H6	11_C_09	SWAT	punctate,bud neck	punctate	punctate,bud	punctate	below threshold	Same	1	0	0	#N/A	0	None	62.2442	17.7575	86.1218	25.7346	#N/A	#N/A	26.43	79.5	7.2	209610000	31	23.57	3.9	0		0	0	0	0	0	0	0	actin:cytoplasm:cytoskeleton	actin	actin:cytoplasm:cytoskeleton	0	#N/A	#N/A	#N/A	ENSG00000115977	01
YDL206W	YDL206W	Putative protein of unknown function; YDL206W is not an essential protein	01_15_13	1H7	05_F_07	SWAT	vacuole membrane	vacuole membrane	below threshold	below threshold	below threshold	New	1	0	0	#N/A	12	6	54.1474	13.7196	59.4614	29.0222	#N/A	#N/A	16.89	#N/A	1	#N/A	#N/A	13.76	12.3	0		0	0	0	0	0	0	0	integral component of membrane:membrane	0	0	0	#N/A	#N/A	#N/A	0	01
YNL070W	TOM7	Component of the TOM (translocase of outer membrane) complex; responsible for recognition and initial import steps for all mitochondrially directed proteins; promotes assembly and stability of the TOM complex	01_15_14	2H7	29_D_5	SWAT	mitochondria	mitochondria	mitochondria	mitochondria	mitochondria	Same	1	0	0	#N/A	1	20	97.0272	31.0721	72.4495	28.0431	6.57215	8.19779	#N/A	#N/A	972.1	3717100000	#N/A	221.47	37	Mitochondria outer membrane		0	0	0	0	0	0	0	mitochondria	mitochondria	mitochondria	mitochondria	#N/A	3.5	#N/A	0	01
YDR342C	HXT7	High-affinity glucose transporter; member of the major facilitator superfamily, nearly identical to Hxt6p, expressed at high basal levels relative to other HXTs, expression repressed by high glucose levels; HXT7 has a paralog, HXT4, that arose from the whole genome duplication	01_15_15	1H8	04_A_12	SWAT	cell periphery	cell periphery,vacuole	below threshold	missing	cell periphery,punctate	New	1	0	0	#N/A	12	61	139.35	14.4215	272.61	54.8769	#N/A	#N/A	#N/A	#N/A	0.2	670590000	81	#N/A	#N/A	0		0	0	0	0	0	0	0	cell periphery:mitochondria	cell periphery	0	cell periphery:mitochondria	#N/A	#N/A	1631	ENSG00000160326	01
YIL102C-A	YIL102C-A	Putative protein of unknown function; identified based on comparisons of the genome sequences of six Saccharomyces species; SWAT-GFP, seamless-GFP and mCherry fusion proteins localize to the endoplasmic reticulum	01_15_16	2H8	08_B_06	SWAT	ER	ER	below threshold	missing	below threshold	New	1	0	0	#N/A	2	5	55.1583	15.2207	53.5153	23.5825	#N/A	#N/A	#N/A	#N/A	21.2	#N/A	#N/A	#N/A	13.8	0		0	0	KxKxx	0	0	0	0	endoplasmic reticulum	0	endoplasmic reticulum	0	#N/A	#N/A	#N/A	0	01
YDL210W	UGA4	GABA (gamma-aminobutyrate) permease; serves as a GABA transport protein involved in the utilization of GABA as a nitrogen source; catalyzes the transport of putrescine and delta-aminolevulinic acid (ALA); localized to the vacuolar membrane	01_15_17	1H9	06_G_02	SWAT	vacuole membrane	vacuole	below threshold	below threshold	#N/A	New	1	0	0	#N/A	9	77	63.5301	14.4451	105.347	0	#N/A	#N/A	15.16	#N/A	0	#N/A	#N/A	1.55	89.7	0		0	0	0	0	0	0	0	vacuolar membrane:vacuole	vacuolar membrane	vacuolar membrane:vacuole	0	#N/A	#N/A	#N/A	0	01
YGR295C	COS6	Endosomal protein involved in turnover of plasma membrane proteins; member of the DUP380 subfamily of conserved, often subtelomeric COS genes; required for the multivesicular vesicle body sorting pathway that internalizes plasma membrane proteins for degradation; Cos proteins provide ubiquitin in trans for nonubiquitinated cargo proteins	01_15_18	2H9	14_F_04	SWAT	vacuole	vacuole	below threshold	vacuole	below threshold	Same	1	0	0	#N/A	4	43	46.0022	16.8965	74.9798	23.3268	#N/A	#N/A	15.73	119	13.6	#N/A	#N/A	#N/A	21.6	0		0	0	0	0	0	0	0	vacuole	0	0	vacuole	#N/A	#N/A	#N/A	0	01
YDR343C	HXT6	High-affinity glucose transporter; member of the major facilitator superfamily, nearly identical to Hxt7p, expressed at high basal levels relative to other HXTs, repression of expression by high glucose requires SNF3; HXT6 has a paralog, HXT1, that arose from the whole genome duplication	01_15_19	1H10	04_F_11	SWAT	cell periphery	cell periphery,vacuole	below threshold	cell periphery	cell periphery,punctate	Same	1	0	0	#N/A	12	61	90.311	14.7286	136.757	46.4862	#N/A	#N/A	#N/A	#N/A	0	#N/A	#N/A	#N/A	8.7	0		0	0	0	0	0	0	0	cell periphery:mitochondria	cell periphery	0	cell periphery:mitochondria	#N/A	#N/A	149	ENSG00000160326	01
YIL105C	SLM1	Phosphoinositide PI4,5P(2) binding protein, forms a complex with Slm2p; acts downstream of Mss4p in a pathway regulating actin cytoskeleton organization in response to stress; TORC2 complex substrate and effector; protein abundance increases in response to DNA replication stress; SLM1 has a paralog, SLM2, that arose from the whole genome duplication	01_15_20	2H10	13_B_01	SWAT	cell periphery,punctate	cell periphery,punctate	punctate	punctate	cell periphery,punctate	Same	2	0	0	#N/A	0	None	63.2395	27.6524	70.4666	35.8192	#N/A	#N/A	37.4	154.5	14.5	872360000	21	40.32	8.3	0		0	0	0	0	0	0	0	cell periphery:cytoplasm:eisosome:mitochondria	cell periphery:eisosome	cell periphery	cell periphery:cytoplasm:mitochondria	#N/A	#N/A	#N/A	0	01
YDL211C	YDL211C	Protein of unknown function; green fluorescent protein (GFP)-fusion protein localizes to the vacuole; YDL211C has a paralog, TDA7, that arose from the whole genome duplication	01_15_21	1H11	14_C_02	SWAT	cytosol	vacuole	below threshold	vacuole	below threshold	Different	1	0	0	#N/A	1	221	33.4717	17.3094	13.2187	26.1637	#N/A	#N/A	18.55	#N/A	4.4	#N/A	#N/A	11.64	4.4	0		0	0	0	0	0	0	0	vacuolar membrane:vacuole	0	vacuolar membrane:vacuole	vacuole	#N/A	3.5	#N/A	0	01
YHL002W	HSE1	Subunit of the endosomal Vps27p-Hse1p complex; complex is required for sorting of ubiquitinated membrane proteins into intralumenal vesicles prior to vacuolar degradation, as well as for recycling of Golgi proteins and formation of lumenal membranes	01_15_22	2H11	14_G_10	SWAT	cytosol,punctate	cytosol,punctate	punctate	punctate	cytosol	Same	1	0	0	#N/A	0	None	69.3404	32.3882	51.2228	34.4043	#N/A	#N/A	34.43	96	31.9	2075300000	23	49.43	7.1	0		0	0	0	0	0	0	0	endosome	endosome	endosome	0	#N/A	3	#N/A	ENSG00000136738	01
YDR345C	HXT3	Low affinity glucose transporter of the major facilitator superfamily; expression is induced in low or high glucose conditions; HXT3 has a paralog, HXT5, that arose from the whole genome duplication	01_15_23	1H12	05_G_11	SWAT	cell periphery	cell periphery,vacuole	cell periphery	cell periphery,vacuole	cell periphery,punctate	Same	1	0	0	#N/A	10	57	98.2453	177.293	175.102	44.0142	#N/A	#N/A	405.63	3056.5	125.7	1582600000	300	#N/A	9.1	0		0	0	0	0	0	0	0	cell periphery	cell periphery	0	0	#N/A	#N/A	#N/A	ENSG00000160326	01
YIL109C	SEC24	Component of the Sec23p-Sec24p heterodimer of the COPII vesicle coat; required for cargo selection during vesicle formation in ER to Golgi transport; homologous to Sfb3p; SEC24 has a paralog, SFB2, that arose from the whole genome duplication	01_15_24	2H12	12_G_10	SWAT	punctate	cytosol,punctate	punctate	ER to punctate	cytosol	Same	2	0	0	#N/A	0	None	202.971	63.9031	184.046	64.8915	#N/A	#N/A	24.91	700.4	56.5	9690000000	#N/A	197.02	#N/A	0		0	0	0	0	0	0	0	COPII vesicle:Golgi:cytoplasm:endoplasmic reticulum	COPII vesicle	COPII vesicle:Golgi:cytoplasm:endoplasmic reticulum	0	inviable	3	#N/A	ENSG00000138802	01
YDL212W	SHR3	Endoplasmic reticulum packaging chaperone; required for incorporation of amino acid permeases into COPII coated vesicles for transport to the cell surface	01_15_25	1H13	07_E_12	SWAT	ER	ER	ER	ER	ER	Same	1	0	0	#N/A	4	7	215.43	52.7643	362.369	49.4653	#N/A	#N/A	71.06	385.5	156.7	1080600000	95	280.05	86.7	0		0	0	0	0	0	0	0	endoplasmic reticulum	endoplasmic reticulum	endoplasmic reticulum	0	inviable	#N/A	#N/A	0	01
YHL003C	LAG1	Ceramide synthase component; involved in synthesis of ceramide from C26(acyl)-coenzyme A and dihydrosphingosine or phytosphingosine, functionally equivalent to Lac1p; forms ER foci upon DNA replication stress; homolog of human CERS2, a tumor metastasis suppressor gene whose silencing enhances invasion/metastasis of prostate cancer cells; LAG1 has a paralog, LAC1, that arose from the whole genome …	01_15_26	2H13	03_E_08	SWAT	cell periphery,ER,punctate	ER	punctate,nuclear periphery	ER	punctate,nuclear periphery	Same	2	0	0	#N/A	8	84	125.239	55.2525	142.152	44.1413	#N/A	#N/A	13.89	497	60	479810000	48	141.06	16.5	0		0	0	KxKxx	0	0	0	0	endoplasmic reticulum	0	endoplasmic reticulum	endoplasmic reticulum	#N/A	#N/A	#N/A	0	01
YDR351W	SBE2	Protein required for bud growth; involved in transport of cell wall components from the Golgi to the cell surface; SBE2 has a paralog, SBE22, that arose from the whole genome duplication	01_15_27	1H14	13_A_08	SWAT	punctate	punctate	punctate	below threshold	below threshold	New	1	0	0	#N/A	0	None	34.6819	20.2592	15.0836	28.5897	#N/A	#N/A	16.51	#N/A	8.4	183620000	#N/A	39.08	4.6	0		0	0	0	0	0	0	0	Golgi	Golgi	Golgi	0	#N/A	4	#N/A	0	01
YIL117C	PRM5	Pheromone-regulated protein, predicted to have 1 transmembrane segment; induced during cell integrity signaling; PRM5 has a paralog, YNL058C, that arose from the whole genome duplication	01_15_28	2H14	10_F_06	Blank	Blank	Blank	Blank	vacuole	#N/A	Blank	1	0	0	#N/A	1	77	15.5739	14.067	5.0846	22.0743	#N/A	#N/A	14.33	#N/A	27.1	84945000	#N/A	39.15	7.1	0		0	0	0	0	0	0	0	integral component of membrane:membrane	0	0	0	#N/A	#N/A	#N/A	0	01
YDL222C	FMP45	Integral membrane protein localized to mitochondria; required for sporulation and maintaining sphingolipid content; similar to SUR7; FMP45 has a paralog, YNL194C, that arose from the whole genome duplication	01_15_29	1H15	04_A_08	SWAT	cell periphery,punctate	cell periphery,punctate	cell periphery,punctate	punctate	below threshold	Same	2	0	0	#N/A	4	6	119.575	49.5173	206.59	35.6806	#N/A	#N/A	53.72	#N/A	3.6	1984200	74	6.69	10.5	0		0	0	0	0	0	0	0	cell periphery:mitochondria	cell periphery	cell periphery	cell periphery:mitochondria	#N/A	#N/A	#N/A	0	01
YHL008C	YHL008C	Putative protein of unknown function; may be involved in the uptake of chloride ions; does not appear to be involved in monocarboxylic acid transport; green fluorescent protein (GFP)-fusion protein localizes to the vacuole	01_15_30	2H15	07_F_07	SWAT	punctate	punctate	below threshold	vacuole	below threshold	Different	1	0	0	#N/A	6	32	40.4725	17.7861	37.2461	22.6748	#N/A	#N/A	15.09	#N/A	3.1	34631000	134	33.59	7.7	0		0	0	0	0	0	0	0	vacuole	0	0	vacuole	#N/A	#N/A	#N/A	0	01
YGL169W	SUA5	Protein involved in threonylcarbamoyl adenosine biosynthesis; Sua5p and Qri7p are necessary and sufficient for RNA t6A modification in vitro; null mutant lacks N6-threonylcarbamoyl adenosine (t6A) modification in the anticodon loop of ANN-decoding tRNA; member of conserved YrdC/Sua5 family; binds single-stranded telomeric DNA and null mutant has abnormal telomere length	01_15_31	1H16	07_A_10	SWAT	cytosol	cytosol	below threshold	cytosol	cytosol,punctate	New	1	0	0	#N/A	0	None	69.1818	22.4592	103.537	47.2999	#N/A	#N/A	#N/A	#N/A	20.4	215580000	26	41.01	10.5	ActiveX VT_ERROR:	ActiveX VT_ERROR:	0	0	ActiveX VT_ERROR:	0	1	0	0	ActiveX VT_ERROR:	ActiveX VT_ERROR:	ActiveX VT_ERROR:	ActiveX VT_ERROR:	inviable	#N/A	#N/A	0	01
YIL120W	QDR1	Multidrug transporter of the major facilitator superfamily; member of the 12-spanner drug:H(+) antiporter DHA1 family; involved in spore wall assembly; sequence similarity to DTR1 and QDR3, and the triple mutant dtr1 qdr1 qdr3 exhibits reduced dityrosine fluorescence relative to the single mutants; required for resistance to quinidine, ketoconazole, fluconazole, and barban; QDR1 has a paralog, AQ…	01_15_32	2H16	06_G_01	SWAT	cell periphery,ER	cell periphery,vacuole	below threshold	below threshold	cytosol	New	2	0	0	#N/A	11	69	59.3728	17.5535	57.1939	29.3143	#N/A	#N/A	16.19	#N/A	1.2	#N/A	#N/A	6.91	19.4	0		0	0	0	0	0	0	0	cell periphery	cell periphery	cell periphery	0	#N/A	#N/A	20	0	01
YDL225W	SHS1	Component of the septin ring that is required for cytokinesis; present at the ends of rod-like septin hetero-oligomers; C-terminal extension is important for recruitment of Bni5p to the mother-bud neck, which in turn is required for Myo1p recruitment and cytokinesis; undergoes sumoylation and phosphorylation during mitosis; protein abundance increases in response to DNA replication stress	01_15_33	1H17	15_B_04	SWAT	bud neck	cytosol,bud neck	bud neck	bud neck,cell periphery	bud neck	Same	1	0	6	0	0	None	119.192	47.5	157.842	53.7862	#N/A	#N/A	NA	255.5	42.6	6386900000	76	68.95	8.9	0		0	0	0	0	0	0	0	bud neck/tip	bud neck/tip	bud neck/tip	0	#N/A	2.5	#N/A	0	01
YHL016C	DUR3	Plasma membrane transporter for both urea and polyamines; expression is highly sensitive to nitrogen catabolite repression and induced by allophanate, the last intermediate of the allantoin degradative pathway	01_15_34	2H17	04_B_03	SWAT	cell periphery,ER	ER	below threshold	cytosol	below threshold	Different	2	0	0	#N/A	15	12	45.0722	18.1175	21.0983	22.0358	#N/A	#N/A	23.77	#N/A	0.6	4596600	#N/A	6.03	9.8	0		0	0	0	0	0	0	0	cell periphery	cell periphery	0	0	#N/A	#N/A	#N/A	0	01
YDR356W	SPC110	Inner plaque spindle pole body (SPB) component; ortholog of human kendrin; gamma-tubulin small complex (gamma-TuSC) receptor that interacts with Spc98p to recruit the complex to the nuclear side of the SPB, connecting nuclear microtubules to the SPB; promotes gamma-TuSC assembly and oligomerization to initiate microtubule nucleation; interacts with Tub4p-complex and calmodulin; phosphorylated by …	01_15_35	1H18	16_F_04	SWAT	punctate,nucleus	punctate,nucleus	punctate,nucleus	punctate	punctate,nucleus	Same	2	0	0	#N/A	0	None	81.1635	33.8091	102.261	38.7221	#N/A	#N/A	22.84	#N/A	14.1	3053500000	36	38.11	5.6	0		0	0	0	0	0	0	0	cytoplasm:cytoskeleton:nucleus:spindle pole body	0	cytoplasm:cytoskeleton:nucleus:spindle pole body	0	inviable	#N/A	#N/A	0	01
YIL121W	QDR2	Plasma membrane transporter of the major facilitator superfamily; member of the 12-spanner drug:H(+) antiporter DHA1 family; exports copper; has broad substrate specificity and can transport many mono- and divalent cations; transports a variety of drugs and is required for resistance to quinidine, barban, cisplatin, and bleomycin; contributes to potassium homeostasis; expression is regulated by c…	01_15_36	2H18	05_C_06	SWAT	cell periphery	cell periphery,vacuole	below threshold	cell periphery	#N/A	Same	1	0	0	#N/A	12	62	51.7206	22.8741	113.532	#N/A	#N/A	#N/A	28.44	375.5	11.1	93727000	52	61.29	11	0		0	0	0	0	0	0	0	cell periphery	cell periphery	cell periphery	0	#N/A	#N/A	#N/A	0	01
YDL226C	GCS1	ADP-ribosylation factor GTPase activating protein (ARF GAP); involved in ER-Golgi transport; required for prospore membrane formation; regulates phospholipase Spo14p; shares functional similarity with Glo3p; GCS1 has a paralog, SPS18, that arose from the whole genome duplication	01_15_37	1H19	11_G_06	SWAT	cytosol,punctate	cytosol,punctate	cytosol,punctate	cytosol	cytosol	Same	2	0	0	#N/A	0	None	160.628	61.2321	263.815	61.8568	#N/A	#N/A	69.95	410.5	146.7	11232000000	109	193.78	12.5	0		0	0	0	0	0	0	0	Golgi:cytoplasm:cytoskeleton:endoplasmic reticulum-Golgi intermediate compartment:endosome:mitochondria	Golgi:cytoskeleton:endoplasmic reticulum-Golgi intermediate compartment:endosome	Golgi:cytoplasm:mitochondria	0	#N/A	2	#N/A	ENSG00000101199	01
YHL019C	APM2	Protein of unknown function; homologous to the medium chain of mammalian clathrin-associated protein complex; involved in vesicular transport	01_15_38	2H19	09_E_12	SWAT	vacuole	nucleus	below threshold	punctate	cytosol	Different	1	0	0	#N/A	0	None	39.2134	18.2289	48.5226	29.1453	#N/A	#N/A	17.8	#N/A	3.2	9235500	2	21.07	9.7	0		0	0	0	0	0	0	0	endosome	0	endosome	0	#N/A	#N/A	#N/A	0	01
YDR358W	GGA1	Golgi-localized protein with homology to gamma-adaptin; interacts with and regulates Arf1p and Arf2p in a GTP-dependent manner in order to facilitate traffic through the late Golgi; GGA1 has a paralog, GGA2, that arose from the whole genome duplication	01_15_39	1H20	11_A_02	SWAT	below threshold	missing	below threshold	cytosol,punctate	cytosol	Same	2	0	0	#N/A	0	None	12.4429	19.7735	0	51.2193	#N/A	#N/A	15.84	119.5	12.5	1454300000	#N/A	26.15	9.4	0		0	0	0	0	0	0	0	Golgi:endosome	Golgi	Golgi:endosome	0	#N/A	#N/A	#N/A	ENSG00000103365	01
YIL124W	AYR1	Bifunctional triacylglycerol lipase and 1-acyl DHAP reductase; NADPH-dependent 1-acyl dihydroxyacetone phosphate reductase involved in phosphatidic acid biosynthesis; lipid droplet triacylglycerol lipase involved in the mobilization of non-polar lipids; found in lipid particles, the endoplasmic reticulum and the mitochondrial outer membrane; required for spore germination; role in cell wall biosy…	01_15_40	2H20	01_H_09	SWAT	ER,punctate	ER,punctate	below threshold	ER	ER,punctate	Same	2	0	0	#N/A	1	250	111.942	19.2664	159.345	50.8351	#N/A	#N/A	#N/A	268	84.4	375860000	76	130.74	16.7	Lipid droplet		0	0	KxKxx	0	0	0	0	cytoplasm:endoplasmic reticulum:lipid particle:mitochondria	endoplasmic reticulum:lipid particle	endoplasmic reticulum:lipid particle	cytoplasm:mitochondria	#N/A	#N/A	#N/A	0	01
YDL231C	BRE4	Zinc finger protein containing five transmembrane domains; null mutant exhibits strongly fragmented vacuoles and sensitivity to brefeldin A, a drug which is known to affect intracellular transport	01_15_41	1H21	06_B_09	SWAT	cell periphery,ER	cell periphery,vacuole	below threshold	below threshold	below threshold	New	2	0	0	#N/A	12	148	42.5081	17.6918	75.8322	28.5942	#N/A	#N/A	16.42	#N/A	0.8	#N/A	#N/A	29.88	9	0		0	0	0	0	0	0	0	integral component of membrane:membrane	0	0	0	#N/A	#N/A	#N/A	0	01
YHL020C	OPI1	Transcriptional regulator of a variety of genes; phosphorylation by protein kinase A stimulates Opi1p function in negative regulation of phospholipid biosynthetic genes; involved in telomere maintenance; null exhibits disrupted mitochondrial metabolism and low cardiolipin content, strongly correlated with overproduction of inositol; binds to phosphatidic acid	01_15_42	2H21	11_D_12	SWAT	nuclear periphery	punctate,nuclear periphery	nuclear periphery	nuclear periphery	below threshold	Same	1	0	0	#N/A	0	None	43.1014	25.1395	30.3899	27.4387	#N/A	#N/A	30.8	72	20.4	283290000	76	53.97	7.3	0		0	0	0	0	0	0	0	endoplasmic reticulum:nuclear membrane:nucleus	endoplasmic reticulum:nuclear membrane:nucleus	endoplasmic reticulum:nucleus	0	#N/A	#N/A	#N/A	0	01
YDR366C	YDR366C	Putative protein of unknown function	01_15_43	1H22	03_G_11	SWAT	below threshold	below threshold	missing	below threshold	#N/A	New	1	0	0	#N/A	4	6	14.3112	#N/A	6.77743	22.9767	#N/A	#N/A	18.28	#N/A	0	#N/A	#N/A	#N/A	#N/A	0		0	0	0	0	0	0	0	integral component of membrane:membrane	0	0	0	#N/A	#N/A	#N/A	0	01
YIL134C-A	YIL134C-A	Putative protein of unknown function; identified by fungal homology and RT-PCR	01_15_44	2H22	01_F_02	SWAT	below threshold	below threshold	below threshold	missing	#N/A	0	0	0	0	#N/A	2	13	13.1227	17.6497	4.67926	22.947	#N/A	#N/A	#N/A	#N/A	0	#N/A	#N/A	#N/A	#N/A	Farnesylation		0	0	0	0	1	0	0	cellular_component:integral component of membrane:membrane	0	0	0	#N/A	#N/A	#N/A	0	01
YDL232W	OST4	Subunit of the oligosaccharyltransferase complex of the ER lumen; complex catalyzes protein asparagine-linked glycosylation; type I membrane protein required for incorporation of Ost3p or Ost6p into the OST complex	01_15_45	1H23	08_A_11	SWAT	ER,punctate	mitochondria	punctate	ER	below threshold	Different	1	0	0	#N/A	1	7	0	17.8117	464.003	24.0077	#N/A	#N/A	116.17	#N/A	617.4	#N/A	#N/A	191.39	21.8	0		0	0	0	0	0	0	0	endoplasmic reticulum	endoplasmic reticulum	endoplasmic reticulum	0	inviable	#N/A	#N/A	0	01
YHL026C	YHL026C	Putative protein of unknown function; transcriptionally regulated by Upc2p via an upstream sterol response element; SWAT-GFP fusion protein localizes to the cell periphery, while mCherry fusion localizes to both the cell periphery and vacuole; YHL026C is not an essential gene; in 2005 the start site was moved 141 nt upstream (see Locus History)	01_15_46	2H23	12_B_12	SWAT	cell periphery	cell periphery,vacuole	below threshold	ambiguous	cell periphery	New	1	0	0	#N/A	3	20	72.2659	18.4495	162.805	38.8506	#N/A	#N/A	18.74	#N/A	2.6	#N/A	#N/A	16.25	12.7	0		0	0	0	0	0	0	0	cellular_component:integral component of membrane:membrane	0	0	0	#N/A	#N/A	#N/A	0	01
YDR367W	KEI1	Component of inositol phosphorylceramide (IPC) synthase; forms a complex with Aur1p and regulates its activity; required for IPC synthase complex localization to the Golgi; post-translationally processed by Kex2p; KEI1 is an essential gene	01_15_47	1H24	04_F_07	SWAT	punctate	cell periphery,vacuole	punctate	punctate,punctate,punctate	ER,punctate	Same	1	0	0	#N/A	4	12	105.272	42.567	269.276	32.9841	#N/A	#N/A	46.47	184.5	32.1	77235000	173	88.19	#N/A	0		0	0	0	0	0	0	0	Golgi:cytoplasm	Golgi	Golgi	Golgi:cytoplasm	inviable	#N/A	#N/A	0	01
YIL134W	FLX1	Mitochondrial flavin adenine dinucleotide transporter; FAD is a synthesis product of riboflavin; human homolog SLC25A32 is implicated in multiple acyl-CoA dehydrogenase deficiency (MADD) or glutaric aciduria type II (GAII), and can complement yeast null mutant	01_15_48	2H24	11_E_10	SWAT	mitochondria	mitochondria	below threshold	below threshold	below threshold	New	1	0	0	#N/A	3	77	33.0561	19.0658	18.6066	24.8196	#N/A	#N/A	15.53	#N/A	6.6	#N/A	#N/A	22.79	16.3	0		0	0	0	0	0	0	0	mitochondria	mitochondria	mitochondria	mitochondria	#N/A	2	#N/A	0	01
YLR262C	YPT6	Rab family GTPase; required for endosome-to-Golgii, intra-Golgi retrograde, and retrograde Golgi-to-ER transport; temporarily at the Golgi, dissociating into the cytosol on arrival of the late Golgi GTPase Ypt32p; Golgi-localized form is GTP bound, while cytosolic form is GDP-bound; required for delivery of Atg9p to the phagophore assembly site during autophagy under heat stress, with Ypt6p for s…	01_16_01	3H1	15_B_11	SWAT	punctate	ER,punctate	punctate	cytosol	ER,punctate	Different	1	0	0	#N/A	0	None	99.2199	45.8368	217.997	45.2705	#N/A	#N/A	40.5	#N/A	129.3	514270000	#N/A	92.48	22	0		0	0	0	0	0	1	0	Golgi:cell periphery:cytoplasm	Golgi:cytoplasm	cell periphery	0	#N/A	#N/A	#N/A	ENSG00000147127	01
YOR245C	DGA1	Diacylglycerol acyltransferase; catalyzes the terminal step of triacylglycerol (TAG) formation, acylates diacylglycerol using acyl-CoA as an acyl donor; Lro1p and Dga1p can O-acylate ceramides; localized to lipid particles	01_16_02	4H1	01_G_09	SWAT	ER,punctate	ER,punctate	ambiguous,punctate	ER,cytosol	#N/A	Same	2	0	0	#N/A	1	71	62.9399	23.8807	71.0439	#N/A	#N/A	#N/A	#N/A	#N/A	12.2	#N/A	41	34.5	13.9	Lipid droplet		0	0	0	0	0	0	0	endoplasmic reticulum:lipid particle	lipid particle	endoplasmic reticulum:lipid particle	0	#N/A	#N/A	#N/A	ENSG00000166391	01
[truncated: 5,422 more rows]
[truncated: 22 more columns]

## Sheet: Array Info
SWAT-GFP tagging cassette features:
pST-N2 - SWAT-GFP	S1_linker-S.cer_CYC1ter-hph_dN-SceI-URA3pr-URA3-URA3ter-S.par_NOP1pr-sfGFP-linker_S4.																				see image below
pST-N3 - SWAT-SP-GFP	S1_linker-S.cer_CYC1ter-hph_dN-SceI-URA3pr-URA3-URA3ter-S.par_NOP1pr-KAR2sp-sfGFP-linker_S4.																				Includes Kar2 signal peptide
SWAT-MTS-GFP	S1_linker-S.cer_CYC1ter-hph_dN-SceI-URA3pr-URA3-URA3ter-S.par_NOP1pr-MTS-sfGFP-linker_S4.																				Includes the MTS of Neurospora crassa OR74A ATP synthase protein 9
[truncated: 127 more rows]

## Sheet: Lookup
ORF	Gene	Description	1536 Plate_Row_Col	384 Plate_Row_Col	Primers F+R 96 P_R_C	Tagging type	New NOP1pr-GFP localization	New TEF2pr-mCherry localization	New N' Seamless GFP localization	New Known C' Localization combined	Tef2pr-VC and Cyto-VN localization	General Differences	Number of localizations per cell	Signal peptide?	SP Prediction class	SignalP SP length	Predicted number of TMDs	TMD_1	Generic GfpIntensity(FG)	Native GfpIntensity(FG)	Tef2pr-mCherryIntensity(FG)	Tef2pr-VC and Cyto-VN GFPIntensity(FG)	Generic GFP secretion score	Native GFP secretion score	C' GFP intensity	FACS	Ribosome	Mass Spectroscopy	Raw Half life	mRNA	mRNA half life	Class	Class Perixosome (Einat's list)	Tail Anchored	GPI anchored protein	ER retrieval signals	Palmitolation	farnazylation	Small GTPases	Proxisome - only PTS1 is C'	Go loc.	Go Manual Curated loc.	Go Computational loc.	Go High Troughtput loc.	Inviable deletion phenotype	Overexpression versus deletion phenotypes	Identical flanking DNA stretch [bp]	Human homologues for yeast genes	1536 P#
[truncated: 100 more rows]
[truncated: 52 more columns]

[truncated: 3 more sheets: Lookup (2), #, Agar]
