# Supplementary material for: A systematic bi-genomic split-GFP assay illuminates the mitochondrial matrix proteome and protein targeting routes
Source: eLife journal article supplement (doi:10.7554/elife.98889), 2024-07-26
Supplement: fig2-data1 [file Voegtle_2017_S5.xlsx]

## Sheet: Supplementary Data 5
Supplementary Data 5: Landscape of submitochondrial protein distribution.
Gene	ORF	Protein description	SNson/PELson (average)	SNcarb/PELcarb (average)	Yeast / Mito	Soluble	Peripheral	Integral	Ambiguous	L sol	L per	L int	Outer membrane	Inner membrane	Inter-membrane space	Matrix				max
AAC1	YMR056C	Mitochondrial inner membrane ADP/ATP translocator; exchanges cytosolic ADP for mitochondrially synthesized ATP; phosphorylated; Aac1p is a minor isoform while Pet9p is the major ADP/ATP translocator; relocalizes from mitochondrion to cytoplasm upon DNA replication stress	0.17951	0.067598	0			X		0	0	0.9136		X						0.9136
AAT1	YKL106W	Mitochondrial aspartate aminotransferase; catalyzes the conversion of oxaloacetate to aspartate in aspartate and asparagine biosynthesis	1.19271	9.95848	0.185944		X			0.0013	0.9637	0.0003		X						0.9637
AAT2	YLR027C	Cytosolic aspartate aminotransferase involved in nitrogen metabolism; localizes to peroxisomes in oleate-grown cells	3.32324	4.1564	17.4914				X	0.0195	0.0296	0								0.0296
ABF2	YMR072W	Mitochondrial DNA-binding protein; involved in mitochondrial DNA replication and recombination, member of HMG1 DNA-binding protein family; activity may be regulated by protein kinase A phosphorylation; ABF2 has a paralog, IXR1, that arose from the whole genome duplication	19.4406	21.6738	0.794568	X				0.9761	0.0002	0				X				0.9761
ACH1	YBL015W	Protein with CoA transferase activity; particularly for CoASH transfer from succinyl-CoA to acetate; has minor acetyl-CoA-hydrolase activity; phosphorylated; required for acetate utilization and for diploid pseudohyphal growth	24.9733	17.9789	0.454824	X				0.9616	0	0				X				0.9616
ACO1	YLR304C	Aconitase; required for the tricarboxylic acid (TCA) cycle and also independently required for mitochondrial genome maintenance; phosphorylated; component of the mitochondrial nucleoid; mutation leads to glutamate auxotrophy	16.2036	20.9901	0.490762	X				0.9817	0.0005	0				X				0.9817
ACO2	YJL200C	Putative mitochondrial aconitase isozyme; similarity to Aco1p, an aconitase required for the TCA cycle; expression induced during growth on glucose, by amino acid starvation via Gcn4p, and repressed on ethanol	10.174	17.8836	0.373527	X				0.9843	0.0024	0				X				0.9843
ACP1	YKL192C	Mitochondrial matrix acyl carrier protein; involved in biosynthesis of octanoate, which is a precursor to lipoic acid; activated by phosphopantetheinylation catalyzed by Ppt2p	7.22506	23.312	0.604881	X				0.9478	0.0313	0				X				0.9478
ACS1	YAL054C	Acetyl-coA synthetase isoform; along with Acs2p, acetyl-coA synthetase isoform is the nuclear source of acetyl-coA for histone acetylation; expressed during growth on nonfermentable carbon sources and under aerobic conditions	0.283382	2.52738	643.213			X		0	0.2732	0.5534		X						0.5534
ACT1	YFL039C	Actin; structural protein involved in cell polarization, endocytosis, and other cytoskeletal functions	0.646306	2.85057	55.1627				X	0	0.3	0.4126								0.4126
ADE1	YAR015W	N-succinyl-5-aminoimidazole-4-carboxamide ribotide synthetase; required for 'de novo' purine nucleotide biosynthesis; red pigment accumulates in mutant cells deprived of adenine; protein abundance increases in response to DNA replication stress	--	0.61658	##			X		#N/A	#N/A	#N/A		X						#N/A
ADH1	YOL086C	Alcohol dehydrogenase; fermentative isozyme active as homo- or heterotetramers; required for the reduction of acetaldehyde to ethanol, the last step in the glycolytic pathway; ADH1 has a paralog, ADH5, that arose from the whole genome duplication	1.20615	3.39328	18.8011				X	0	0.339	0.0418								0.339
ADH2	YMR303C	Glucose-repressible alcohol dehydrogenase II; catalyzes the conversion of ethanol to acetaldehyde; involved in the production of certain carboxylate esters; regulated by ADR1	1.36445	4.3429	31.0347				X	0.0003	0.5806	0.0084								0.5806
ADH3	YMR083W	Mitochondrial alcohol dehydrogenase isozyme III; involved in the shuttling of mitochondrial NADH to the cytosol under anaerobic conditions and ethanol production	22.8749	24.6079	0.579452	X				0.9625	0.0002	0				X				0.9625
ADH4	YGL256W	Alcohol dehydrogenase isoenzyme type IV; dimeric enzyme demonstrated to be zinc-dependent despite sequence similarity to iron-activated alcohol dehydrogenases; transcription is induced in response to zinc deficiency	6.25465	15.532	9.07451	X				0.9585	0.0213	0				X				0.9585
ADK1	YDR226W	Adenylate kinase, required for purine metabolism; localized to the cytoplasm and the mitochondria; lacks cleavable signal sequence; protein abundance increases in response to DNA replication stress	9.36936	7.89449	12.8208	X				0.8891	0.0007	0			X					0.8891
ADY2	YCR010C	Acetate transporter required for normal sporulation; phosphorylated in mitochondria; ADY2 has a paralog, ATO2, that arose from the whole genome duplication	0.179012	0.103871	3.15035			X		0	0	0.9316		X						0.9316
AEP1	YMR064W	Protein required for expression of the mitochondrial OLI1 gene; mitochondrial OLI1 gene encodes subunit 9 of F1-F0 ATP synthase	0.548742	2.0566	0			X		0	0.047	0.7475		X						0.7475
AEP2	YMR282C	Mitochondrial protein; likely involved in translation of the mitochondrial OLI1 mRNA; exhibits genetic interaction with the OLI1 mRNA 5'-untranslated leader	0.33339	1.20325	0.0152115			X		0	0.0014	0.922		X						0.922
AEP3	YPL005W	Peripheral mitochondrial inner membrane protein; may facilitate use of unformylated tRNA-Met in mitochondrial translation initiation; stabilizes the bicistronic AAP1-ATP6 mRNA	0.603059	2.77108	0			X		0	0.2684	0.4714		X						0.4714
AFG1	YEL052W	Protein that may act as a chaperone for cytochrome c oxidase subunits; conserved protein; may act as a chaperone in the degradation of misfolded or unassembled cytochrome c oxidase subunits; localized to matrix face of the mitochondrial inner membrane; member of the AAA family but lacks a protease domain	0.511464	8.18796	0.303397		X			0	0.959	0.0078		X						0.959
AFG3	YER017C	Mitochondrial inner membrane m-AAA protease component; mediates degradation of misfolded or unassembled proteins and is also required for correct assembly of mitochondrial enzyme complexes; involved in cytoplasmic mRNA translation and aging	0.21612	0.157986	0.350442			X		0	0	0.9591		X						0.9591
AGC1	YPR021C	Mitochondrial amino acid transporter; acts both as a glutamate uniporter and as an aspartate-glutamate exchanger; involved in nitrogen metabolism and nitrogen compound biosynthesis	0.192557	0.10908	0.0595375			X		0	0	0.9432		X						0.9432
AGX1	YFL030W	Alanine:glyoxylate aminotransferase (AGT); catalyzes the synthesis of glycine from glyoxylate, which is one of three pathways for glycine biosynthesis in yeast; has similarity to mammalian and plant alanine:glyoxylate aminotransferases	20.675	28.8212	0.538834	X				0.9561	0.0008	0				X				0.9561
AHP1	YLR109W	Thiol-specific peroxiredoxin; reduces hydroperoxides to protect against oxidative damage; function in vivo requires covalent conjugation to Urm1p	1.83779	6.94255	232.618		X			0.016	0.811	0.0002		X						0.811
AI1	Q0050	Reverse transcriptase required for splicing of the COX1 pre-mRNA; encoded by a mobile group II intron within the mitochondrial COX1 gene	0.239837	4.58063	0.230708		X			0	0.8334	0.0639		X						0.8334
AI2	Q0055	Reverse transcriptase required for splicing of the COX1 pre-mRNA; encoded by a mobile group II intron within the mitochondrial COX1 gene	0.208477	5.75836	0.0494374		X			0	0.8702	0.0241		X						0.8702
AI3	Q0060	Endonuclease I-SceIII; encoded by a mobile group I intron within the mitochondrial COX1 gene	0.395327	4.4733	0		X			0	0.8206	0.0982		X						0.8206
AI4	Q0065	Endonuclease I-SceII; encoded by a mobile group I intron within the mitochondrial COX1 gene; intron is normally spliced by the BI4p maturase but AI4p can mutate to acquire the same maturase activity	0.220674	7.62937	0		X			0	0.8894	0.0123		X						0.8894
AI5_ALPHA	Q0070	Endonuclease I-SceIV; involved in intron mobility; encoded by a mobile group I intron within the mitochondrial COX1 gene	0.957207	5.733	0		X			0.0001	0.9015	0.0079		X						0.9015
AIM1	YAL046C	Protein involved in mitochondrial function or organization; null mutant displays elevated frequency of mitochondrial genome loss	11.6217	11.0644	0	X				0.9699	0.0003	0				X				0.9699
AIM10	YER087W	Protein with similarity to tRNA synthetases; non-tagged protein is detected in purified mitochondria; null mutant is viable and displays elevated frequency of mitochondrial genome loss	6.03059	6.66418	0.0909359	X				0.6981	0.0082	0				X				0.6981
AIM17	YHL021C	Putative protein of unknown function; the authentic, non-tagged protein is detected in highly purified mitochondria in high-throughput studies; null mutant displays reduced frequency of mitochondrial genome loss	5.31071	10.3457	0.34415	X				0.9148	0.0285	0				X				0.9148
AIM18	YHR198C	Putative protein of unknown function; the authentic, non-tagged protein is detected in highly purified mitochondria in high-throughput studies; null mutant displays elevated frequency of mitochondrial genome loss	2.15837	13.9106	0.389319		X			0.0773	0.8763	0	X							0.8763
AIM19	YIL087C	Putative protein of unknown function; mitochondrial protein that physically interacts with Tim23p; null mutant displays reduced respiratory growth	0.276917	0.0629816	0.142496			X		0	0	0.9456		X						0.9456
AIM22	YJL046W	Putative lipoate-protein ligase; required along with Lip2 and Lip5 for lipoylation of Lat1p and Kgd2p; similar to E. coli LplA; null mutant displays reduced frequency of mitochondrial genome loss	3.21868	4.62811	0				X	0.0427	0.0659	0								0.0659
AIM23	YJL131C	Mitochondrial translation initiation factor 3 (IF3, mIF3); evolutionarily conserved; binds to E. coli ribosomes in vitro; null mutant displays severe respiratory growth defect and elevated frequency of mitochondrial genome loss	3.41983	6.95878	0.178612				X	0.3881	0.2185	0								0.3881
AIM24	YJR080C	Protein with a role in determining mitochondrial architecture; inner membrane protein that interacts physically and genetically with the MICOS complex and is required for its integrity	0.201585	0.0933149	0.19775			X		0	0	0.9442		X						0.9442
AIM25	YJR100C	Putative protein of unknown function; non-tagged protein is detected in purified mitochondria in high-throughput studies; similar to murine NOR1; null mutant is viable and displays elevated frequency of mitochondrial genome loss	0.232742	1.82571	0.106481			X		0	0.071	0.7432		X						0.7432
AIM32	YML050W	Putative protein of unknown function; null mutant is viable and displays elevated frequency of mitochondrial genome loss	4.91454	10.0469	0.119082	X				0.8861	0.0438	0				X				0.8861
AIM34	YMR003W	Protein of unknown function; GFP-fusion protein localizes to the mitochondria; null mutant is viable and displays reduced frequency of mitochondrial genome loss	0.408728	3.68813	0		X			0	0.6659	0.2158		X						0.6659
AIM36	YMR157C	Protein of unknown function; null mutant displays reduced respiratory growth and elevated frequency of mitochondrial genome loss; the authentic, non-tagged protein is detected in purified mitochondria in high-throughput studies	0.403122	0.506157	0.313763			X		0	0	0.9606		X						0.9606
AIM39	YOL053W	Putative protein of unknown function; null mutant displays elevated frequency of mitochondrial genome loss	0.20916	0.208369	0.128803			X		0	0	0.9572		X						0.9572
AIM41	YOR215C	Putative protein of unknown function; the authentic protein is detected in highly purified mitochondria in high-throughput studies; null mutant displays reduced frequency of mitochondrial genome loss	15.1028	21.7778	1.05948	X				0.9821	0.0008	0				X				0.9821
AIM45	YPR004C	Putative ortholog of mammalian ETF-alpha; interacts with frataxin, Yfh1p; null mutant displays elevated frequency of mitochondrial genome loss; may have a role in oxidative stress response; ETF-alpha is an electron transfer flavoprotein complex subunit	4.57389	21.5278	0.216619	X				0.759	0.2052	0				X				0.759
AIM46	YHR199C	Putative protein of unknown function; the authentic, non-tagged protein is detected in highly purified mitochondria in high-throughput studies; null mutant displays elevated frequency of mitochondrial genome loss	0.528346	7.89885	0.0399302		X			0	0.958	0.0083		X						0.958
AIM9	YER080W	Putative protein of unknown function; the authentic, non-tagged protein is detected in highly purified mitochondria in high-throughput studies; null mutant displays elevated frequency of mitochondrial genome loss	1.16034	18.3862	0.699371		X			0.0013	0.9701	0.0001		X						0.9701
ALA1	YOR335C	Cytoplasmic and mitochondrial alanyl-tRNA synthetase; required for protein synthesis; point mutation (cdc64-1 allele) causes cell cycle arrest at G1; lethality of null mutation is functionally complemented by human homolog AARS; mutations in human homolog AARS are associated with autoimmune disease polymyositis/dermatomyositis	3.91074	6.89099	5.6246	X				0.507	0.1127	0				X				0.507
ALD4	YOR374W	Mitochondrial aldehyde dehydrogenase; required for growth on ethanol and conversion of acetaldehyde to acetate; phosphorylated; activity is K+ dependent; utilizes NADP+ or NAD+ equally as coenzymes; expression is glucose repressed; can substitute for cytosolic NADP-dependent aldehyde dehydrogenase when directed to the cytosol	7.53859	18.6339	1.26539	X				0.9716	0.0126	0				X				0.9716
ALD5	YER073W	Mitochondrial aldehyde dehydrogenase; involved in regulation or biosynthesis of electron transport chain components and acetate formation; activated by K+; utilizes NADP+ as the preferred coenzyme; constitutively expressed	12.138	22.2507	0.768113	X				0.9823	0.0023	0				X				0.9823
ALD6	YPL061W	Cytosolic aldehyde dehydrogenase; activated by Mg2+ and utilizes NADP+ as the preferred coenzyme; required for conversion of acetaldehyde to acetate; constitutively expressed; locates to the mitochondrial outer surface upon oxidative stress	1.42576	2.3529	25.6086				X	0	0.0251	0.0359								0.0359
ALG11	YNL048W	Alpha-1,2-mannosyltransferase; catalyzes sequential addition of the two terminal alpha 1,2-mannose residues to the Man5GlcNAc2-PP-dolichol intermediate during asparagine-linked glycosylation in the ER	4.5913	2.78839	##				X	0.0006	0.0002	0								0.0006
ALG9	YNL219C	Mannosyltransferase, involved in N-linked glycosylation; catalyzes both the transfer of seventh mannose residue on B-arm and ninth mannose residue on the C-arm from Dol-P-Man to lipid-linked oligosaccharides; mutation of the human ortholog causes type 1 congenital disorders of glycosylation	0.37691	0.64	2.93026			X		0	0	0.957		X						0.957
ALO1	YML086C	D-Arabinono-1,4-lactone oxidase; catalyzes the final step in biosynthesis of dehydro-D-arabinono-1,4-lactone, which is protective against oxidative stress	0.614834	0.62872	0.18583			X		0	0	0.9001	X							0.9001
ALT1	YLR089C	Alanine transaminase (glutamic pyruvic transaminase); involved in alanine biosynthesis and catabolism; TOR1-independent role in determining chronological lifespan; expression is induced in the presence of alanine; repression is mediated by Nrg1p; ALT1 has a paralog, ALT2, that arose from the whole genome duplication; Alt2p is catalytically inactive	3.63119	20.443	0.231649	X				0.5189	0.4364	0				X				0.5189
AMS1	YGL156W	Vacuolar alpha mannosidase; involved in free oligosaccharide (fOS) degradation; delivered to the vacuole in a novel pathway separate from the secretory pathway	3.081	20.00**	42.9396	X				#N/A	#N/A	#N/A				X				#N/A
APE2	YKL157W	Aminopeptidase yscII; may have a role in obtaining leucine from dipeptide substrates; APE2 has a paralog, AAP1, that arose from the whole genome duplication	13.2652	3.94714	1.60281				X	0.0271	0	0								0.0271
APE4	YHR113W	Cytoplasmic aspartyl aminopeptidase with possible vacuole function; Cvt pathway cargo protein; cleaves unblocked N-terminal acidic amino acids from peptide substrates; forms a 12-subunit homo-oligomer; M18 metalloprotease family	7.11749	3.2292	4.50809				X	0.0048	0	0								0.0048
APN1	YKL114C	Major apurinic/apyrimidinic endonuclease; 3'-repair diesterase; involved in repair of DNA damage by oxidation and alkylating agents; also functions as a 3'-5' exonuclease to repair 7,8-dihydro-8-oxodeoxyguanosine; genetically interacts with NTG1 to maintain mitochondrial genome integrity	2.91543	20.00**	1.31833	X				#N/A	#N/A	#N/A				X				#N/A
APP1	YNL094W	Phosphatidate phosphatase, converts phosphatidate to diacylglycerol; App1p, Pah1p, Dpp1p, and Lpp1p are responsible for all the phosphatidate phosphatase activity; component of cortical actin patches; interacts with components of endocytic pathway	0.650064	1.4983	0			X		0	0.0034	0.7793		X						0.7793
ARC1	YGL105W	Protein that binds tRNA and methionyl- and glutamyl-tRNA synthetases; involved in tRNA delivery, stimulating catalysis, and ensuring localization; also binds quadruplex nucleic acids; protein abundance increases in response to DNA replication stress; methionyl-tRNA synthetase is Mes1p; glutamyl-tRNA synthetase is Gus1p	4.80113	12.5567	5.0716	X				0.8956	0.0635	0				X				0.8956
ARG1	YOL058W	Arginosuccinate synthetase; catalyzes the formation of L-argininosuccinate from citrulline and L-aspartate in the arginine biosynthesis pathway; potential Cdc28p substrate	1.60151	2.9598	138.398				X	0	0.0773	0.011								0.0773
ARG2	YJL071W	Acetylglutamate synthase (glutamate N-acetyltransferase); mitochondrial enzyme that catalyzes the first step in the biosynthesis of the arginine precursor ornithine; forms a complex with Arg5,6p	1.84177	4.47524	0.0965753				X	0.0029	0.3824	0.0013								0.3824
ARG5,6	YER069W	Acetylglutamate kinase and N-acetyl-gamma-glutamyl-phosphate reductase; N-acetyl-L-glutamate kinase (NAGK) catalyzes the 2nd and N-acetyl-gamma-glutamyl-phosphate reductase (NAGSA), the 3rd step in arginine biosynthesis; synthesized as a precursor which is processed in the mitochondrion to yield mature NAGK and NAGSA; enzymes form a metabolon complex with Arg2p; NAGK C-terminal domain stabilizes …	2.12291	16.763	0.618601		X			#N/A	#N/A	#N/A		X						#N/A
ARG7	YMR062C	Mitochondrial ornithine acetyltransferase; catalyzes the fifth step in arginine biosynthesis; also possesses acetylglutamate synthase activity, regenerates acetylglutamate while forming ornithine	23.0012	22.1562	0.571934	X				0.9667	0.0001	0				X				0.9667
ARG8	YOL140W	Acetylornithine aminotransferase; catalyzes the fourth step in the biosynthesis of the arginine precursor ornithine	22.4027	20.0356	0.40954	X				0.9703	0.0001	0				X				0.9703
ARH1	YDR376W	Oxidoreductase of the mitochondrial inner membrane; involved in cytoplasmic and mitochondrial iron homeostasis and required for activity of Fe-S cluster-containing enzymes; one of the few mitochondrial proteins essential for viability	6.27303	4.1214	0.207637				X	0.0533	0.0007	0								0.0533
ATG32	YIL146C	Mitochondrial outer membrane protein required to initiate mitophagy; recruits the autophagy adaptor protein Atg11p and the ubiquitin-like protein Atg8p to the mitochondrial surface to initiate mitophagy, the selective vacuolar degradation of mitochondria in response to starvation; can promote pexophagy when placed ectopically in the peroxisomal membrane; regulates mitophagy and ethanol production…	0.150834	0.28972	0.593249			X		0	0	0.8857	X							0.8857
ATM1	YMR301C	Mitochondrial inner membrane ATP-binding cassette (ABC) transporter; exports mitochondrially synthesized precursors of iron-sulfur (Fe/S) clusters to the cytosol	0.219436	0.180982	0.18375			X		0	0	0.9607		X						0.9607
ATO2	YNR002C	Putative transmembrane protein involved in export of ammonia; ammonia is a starvation signal that promotes cell death in aging colonies; phosphorylated in mitochondria; member of the TC 9.B.33 YaaH family; homolog of Y. lipolytica Gpr1p; ATO2 has a paralog, ADY2, that arose from the whole genome duplication	0.151233	1.57795	0.519092			X		0	0.0835	0.4954		X						0.4954
ATO3	YDR384C	Plasma membrane protein, putative ammonium transporter; regulation pattern suggests a possible role in export of ammonia from the cell; phosphorylated in mitochondria; member of the TC 9.B.33 YaaH family of putative transporters	0.136121	0.0854409	0.888007			X		0	0	0.8346		X						0.8346
ATP1	YBL099W	Alpha subunit of the F1 sector of mitochondrial F1F0 ATP synthase; which is a large, evolutionarily conserved enzyme complex required for ATP synthesis; F1 translationally regulates ATP6 and ATP8 expression to achieve a balanced output of ATP synthase genes encoded in nucleus and mitochondria; phosphorylated; N-terminally propionylated in vivo	1.90516	24.2732	0.645637		X			0.0199	0.9401	0		X						0.9401
ATP10	YLR393W	Assembly factor for the F0 sector of mitochondrial F1F0 ATP synthase; mitochondrial inner membrane protein; interacts genetically with ATP6	1.1166	12.0708	0.125841		X			0.001	0.972	0.0002		X						0.972
ATP11	YNL315C	Molecular chaperone; required for the assembly of alpha and beta subunits into the F1 sector of mitochondrial F1F0 ATP synthase; N-terminally propionylated in vivo	2.45399	15.995	0.495415		X			0.144	0.8099	0		X						0.8099
ATP12	YJL180C	Assembly factor for the F1 sector of mitochondrial F1F0 ATP synthase; conserved protein; required for the assembly of alpha and beta subunits into the F1 sector of the mitochondrial F1F0 ATP synthase; mutation of human ATP12 reduces active ATP synthase levels and is associated with the disorder ATPAF2 deficiency	1.24769	17.4611	0.246088		X			0.0022	0.9703	0		X	X					0.9703
ATP14	YLR295C	Subunit h of the F0 sector of mitochondrial F1F0 ATP synthase; F1F0 ATP synthase is a large, evolutionarily conserved enzyme complex required for ATP synthesis; protein abundance increases in response to DNA replication stress	1.51011	35.5869	0		X			0.0022	0.9116	0		X						0.9116
ATP15	YPL271W	Epsilon subunit of the F1 sector of mitochondrial F1F0 ATP synthase; which is a large, evolutionarily conserved enzyme complex required for ATP synthesis; F1 translationally regulates ATP6 and ATP8 expression to achieve a balanced output of ATP synthase genes encoded in nucleus and mitochondria; phosphorylated	2.92955	21.0778	0.0757548	X				0.2376	0.7156	0				X				0.7156
ATP17	YDR377W	Subunit f of the F0 sector of mitochondrial F1F0 ATP synthase; F1F0 ATP synthase is a large, evolutionarily conserved enzyme complex required for ATP synthesis	0.288922	0.0804554	1.14722			X		0	0	0.9561		X						0.9561
ATP18	YML081C-A	Subunit of the mitochondrial F1F0 ATP synthase; F1F0 ATP synthase is a large, evolutionarily conserved enzyme complex required for ATP synthesis; termed subunit I or subunit j; does not correspond to known ATP synthase subunits in other organisms	0.230437	0.0568973	1.51608			X		0	0	0.9335		X						0.9335
ATP19	YOL077W-A	Subunit k of the mitochondrial F1F0 ATP synthase; F1F0 ATP synthase is a large, evolutionarily conserved enzyme complex required for ATP synthesis; associated only with the dimeric form of ATP synthase	0.412186	18.8939	0		X			0	0.8898	0.0023		X						0.8898
ATP2	YJR121W	Beta subunit of the F1 sector of mitochondrial F1F0 ATP synthase; which is a large, evolutionarily conserved enzyme complex required for ATP synthesis; F1 translationally regulates ATP6 and ATP8 expression to achieve a balanced output of ATP synthase genes encoded in nucleus and mitochondria; phosphorylated	1.98624	21.7369	0.664521		X			0.0306	0.9322	0		X						0.9322
ATP20	YPR020W	Subunit g of the mitochondrial F1F0 ATP synthase; reversibly phosphorylated on two residues; unphosphorylated form is required for dimerization of the ATP synthase complex, which in turn determines oligomerization of the complex and the shape of inner membrane cristae	0.29779	0.801652	0.117451			X		0	0	0.9474		X						0.9474
ATP22	YDR350C	Specific translational activator for the mitochondrial ATP6 mRNA; Atp6p encodes a subunit of F1F0 ATP synthase; localized to the mitochondrial inner membrane	0.370845	2.50098	0.377522			X		0	0.202	0.6369		X						0.6369
ATP23	YNR020C	Putative metalloprotease of the mitochondrial inner membrane; required for processing of Atp6p; has an additional role in assembly of the F0 sector of the F1F0 ATP synthase complex; substrate of the Mia40p-Erv1p disulfide relay system, and folding is assisted by Mia40p	0.504974	6.27258	0.212961		X			0	0.9342	0.0209		X						0.9342
ATP25	YMR098C	Mitochondrial protein required for the stability of Oli1p (Atp9p) mRNA; also required for the Oli1p ring formation; YMR098C is not an essential gene	0.802461	5.27904	0.151698		X			0	0.8905	0.0195		X						0.8905
ATP3	YBR039W	Gamma subunit of the F1 sector of mitochondrial F1F0 ATP synthase; F1F0 ATP synthase is a large, evolutionarily conserved enzyme complex required for ATP synthesis	1.5067	26.5818	0.575132		X			0.0043	0.9511	0		X						0.9511
ATP4	YPL078C	Subunit b of the stator stalk of mitochondrial F1F0 ATP synthase; ATP synthase is a large, evolutionarily conserved enzyme complex required for ATP synthesis; contributes to the oligomerization of the complex, which in turn determines the shape of inner membrane cristae; phosphorylated	0.269653	0.123445	0.429786			X		0	0	0.9656		X						0.9656
ATP5	YDR298C	Subunit 5 of the stator stalk of mitochondrial F1F0 ATP synthase; F1F0 ATP synthase is a large, evolutionarily conserved enzyme complex required for ATP synthesis; homologous to bovine subunit OSCP (oligomycin sensitivity-conferring protein); phosphorylated	1.40919	22.8982	0.319954		X			0.0037	0.9606	0		X						0.9606
ATP6	Q0085	Subunit a of the F0 sector of mitochondrial F1F0 ATP synthase; mitochondrially encoded; translation is specifically activated by Atp22p; ATP6 and ATP8 mRNAs are not translated in the absence of the F1 sector of ATPase	--	0.063552	0			X		#N/A	#N/A	#N/A		X						#N/A
ATP7	YKL016C	Subunit d of the stator stalk of mitochondrial F1F0 ATP synthase; F1F0 ATP synthase is a large, evolutionarily conserved enzyme complex required for ATP synthesis	0.669728	0.0861533	0.466053			X		0	0	0.7893		X						0.7893
ATP8	Q0080	Subunit 8 of the F0 sector of mitochondrial F1F0 ATP synthase; encoded on the mitochondrial genome; ATP8 and ATP6 mRNAs are not translated in the absence of the F1 sector of ATPase	--	0.0110711	##			X		#N/A	#N/A	#N/A		X						#N/A
AYR1	YIL124W	Bifunctional triacylglycerol lipase and 1-acyl DHAP reductase; NADPH-dependent 1-acyl dihydroxyacetone phosphate reductase involved in phosphatidic acid biosynthesis; lipid droplet triacylglycerol lipase involved in the mobilization of non-polar lipids; found in lipid particles, the endoplasmic reticulum and the mitochondrial outer membrane; required for spore germination; role in cell wall biosy…	0.405552	4.26304	0.863567		X			0	0.7908	0.1198	X							0.7908
BAT1	YHR208W	Mitochondrial branched-chain amino acid (BCAA) aminotransferase; preferentially involved in BCAA biosynthesis; homolog of murine ECA39; highly expressed during logarithmic phase and repressed during stationary phase; BAT1 has a paralog, BAT2, that arose from the whole genome duplication	4.63948	25.707	0.257412	X				0.6714	0.2833	0				X				0.6714
BBC1	YJL020C	Protein possibly involved in assembly of actin patches; interacts with an actin assembly factor Las17p and with the SH3 domains of Type I myosins Myo3p and Myo5p; localized predominantly to cortical actin patches	1.73971	2.40625	6.2876				X	0	0.0129	0.0081								0.0129
BCS1	YDR375C	Protein translocase and chaperone required for Complex III assembly; member of the AAA ATPase family; forms a homo-oligomeric complex in the mitochondrial inner membrane that translocates the C-terminal domain of Rip1p from the matrix across the inner membrane, and then delivers it to an assembly intermediate of respiratory Complex III in an ATP-dependent reaction; also required for assembly of t…	0.284552	2.32631	0.140177			X		0	0.1875	0.6416		X						0.6416
BGL2	YGR282C	Endo-beta-1,3-glucanase; major protein of the cell wall, involved in cell wall maintenance; involved in incorporation of newly synthesized mannoprotein molecules into the cell wall	1.04781	1.81772	1.97497				X	0	0.0094	0.2635								0.2635
BI2	Q0110	Mitochondrial mRNA maturase with a role in splicing; encoded by both exon and intron sequences of partially processed COB mRNA	0.281147	16.35	0		X			0	0.8086	0.004		X						0.8086
BI4	Q0120	Mitochondrial mRNA maturase; forms a complex with Nam2p to mediate splicing of the bI4 intron of the COB gene; encoded by both exon and intron sequences of partially processed COB mRNA	0.20606	10.7641	0		X			0	0.8229	0.0059		X						0.8229
BIO2	YGR286C	Biotin synthase; catalyzes the conversion of dethiobiotin to biotin, which is the last step of the biotin biosynthesis pathway; complements E. coli bioB mutant	3.49311	9.46102	0.395499	X				0.6006	0.2624	0				X				0.6006
BMH1	YER177W	14-3-3 protein, major isoform; controls proteome at post-transcriptional level, binds proteins and DNA, involved in regulation of exocytosis, vesicle transport, Ras/MAPK and rapamycin-sensitive signaling, aggresome formation, spindle position checkpoint; protein increases in abundance and relative distribution to the nucleus increases upon DNA replication stress; antiapoptotic gene similar to hum…	0.956228	3.37751	42.1757				X	0	0.455	0.1055								0.455
BMH2	YDR099W	14-3-3 protein, minor isoform; controls proteome at post-transcriptional level, binds proteins and DNA, involved in regulation of many processes including exocytosis, vesicle transport, Ras/MAPK signaling, and rapamycin-sensitive signaling; protein increases in abundance and relative distribution to the nucleus increases upon DNA replication stress; abundance relative to Bmh1p increases during sp…	1.13195	2.85172	45.9262				X	0	0.1732	0.0942								0.1732
BNA3	YJL060W	Kynurenine aminotransferase; catalyzes formation of kynurenic acid from kynurenine; potential Cdc28p substrate	11.3813	19.9173	0.830548	X				0.9843	0.002	0				X				0.9843
BNA4	YBL098W	Kynurenine 3-mono oxygenase; required for the de novo biosynthesis of NAD from tryptophan via kynurenine; expression regulated by Hst1p; putative therapeutic target for Huntington disease	0.365677	0.201257	0.0883562			X		0	0	0.9689	X							0.9689
CAB5	YDR196C	Subunit of the CoA-Synthesizing Protein Complex (CoA-SPC); subunits of this complex are: Cab2p, Cab3p, Cab4p, Cab5p, Sis2p and Vhs3p; probable dephospho-CoA kinase (DPCK) that catalyzes the last step in coenzyme A biosynthesis; null mutant lethality is complemented by E. coli coaE (encoding DPCK); detected in purified mitochondria in high-throughput studies; also localized to lipid droplets	0.37165	2.75346	0.778639			X		0	0.3099	0.5299	X							0.5299
CAF4	YKR036C	WD40 repeat-containing protein associated with the CCR4-NOT complex; interacts in a Ccr4p-dependent manner with Ssn2p; also interacts with Fis1p, Mdv1p and Dnm1p and plays a role in mitochondrial fission; CAF4 has a paralog, MDV1, that arose from the whole genome duplication	0.809575	2.45141	0.384513				X	0	0.1217	0.4009	X							0.4009
CAJ1	YER048C	Nuclear type II J heat shock protein of the E. coli dnaJ family; contains a leucine zipper-like motif, binds to non-native substrates for presentation to Ssa3p, may function during protein translocation, assembly and disassembly	0.919755	12.574	19.2946		X			0.0003	0.9744	0.0004		X						0.9744
CAM1	YPL048W	One of two isoforms of the gamma subunit of eEF1B; stimulates the release of GDP from eEF1A (Tef1p/Tef2p) post association with the ribosomal complex with eEF1Balpha subunit; nuclear protein required for transcription of MXR1; binds the MXR1 promoter in the presence of other nuclear factors; binds calcium and phospholipids	0.586224	2.07624	28.0629			X		0	0.0485	0.7186		X						0.7186
CAR2	YLR438W	L-ornithine transaminase (OTAse); catalyzes the second step of arginine degradation, expression is dually-regulated by allophanate induction and a specific arginine induction process; not nitrogen catabolite repression sensitive; protein abundance increases in response to DNA replication stress	1.67629	3.6233	41.7321				X	0.0004	0.2057	0.005								0.2057
CAT2	YML042W	Carnitine acetyl-CoA transferase; present in both mitochondria and peroxisomes; transfers activated acetyl groups to carnitine to form acetylcarnitine which can be shuttled across membranes	13.5937	22.9654	0.657517	X				0.9815	0.0016	0				X				0.9815
CAT5	YOR125C	Protein required for ubiquinone (Coenzyme Q) biosynthesis; localizes to the matrix face of the mitochondrial inner membrane in a large complex with ubiquinone biosynthetic enzymes; required for gluconeogenic gene activation	1.95707	9.53016	0.509986		X			0.0391	0.8804	0		X						0.8804
CBP1	YJL209W	Mitochondrial protein, regulator of COB mRNA stability and translation; interacts with the 5'-untranslated region of the COB mRNA; found in a complex at the inner membrane along with Pet309p; localizes to mitochondrial foci upon DNA replication stress	0.64148	3.52349	0.332219		X			0	0.5948	0.2028		X						0.5948
CBP2	YHL038C	Required for splicing of the group I intron bI5 of the COB pre-mRNA; nuclear-encoded mitochondrial protein that binds to the RNA to promote splicing; also involved in but not essential for splicing of the COB bI2 intron and the intron in the 21S rRNA gene	0.970922	7.25277	0.0907703		X			0.0002	0.9474	0.0024		X						0.9474
CBP3	YPL215W	Mitochondrial protein required for assembly of cytochrome bc1 complex; forms a complex with Cbp6p that binds to mt ribosomes near the polypeptide tunnel exit and promotes efficient translation of the COB mRNA; Cbp3p-Cbp6p complex also interacts with newly synthesized cytochrome b (Cobp) and Cbp4p to promote assembly of Cobp into the cytochrome bc1 complex; Cbp3p-Cbp6p complex is sequestered if as…	0.310684	5.25662	0.381555		X			0	0.8819	0.0494		X						0.8819
CBP4	YGR174C	Mitochondrial protein required for assembly of cytochrome bc1 complex; interacts with the Cbp3p-Cbp6p complex and newly synthesized cytochrome b (Cobp) to promote assembly of Cobp into the cytochrome bc1 complex	0.265985	0.0925125	0.564999			X		0	0	0.9595		X						0.9595
CBP6	YBR120C	Mitochondrial protein required for translation of the COB mRNA; forms a complex with Cbp3p that binds to mt ribosomes near the polypeptide tunnel exit and promotes efficient translation of the COB mRNA; Cbp3p-Cbp6p complex also interacts with newly synthesized cytochrome b (Cobp) and Cbp4p to promote assembly of Cobp into the cytochrome bc1 complex; Cbp3p-Cbp6p complex is sequestered if assembly …	1.17061	2.03222	0.520393				X	0	0.0166	0.1406								0.1406
CBR1	YIL043C	Microsomal cytochrome b reductase; not essential for viability; also detected in mitochondria; mutation in conserved NADH binding domain of the human ortholog results in type I methemoglobinemia	0.458063	0.409183	1.15931			X		0	0	0.9569	X							0.9569
CBS2	YDR197W	Mitochondrial translational activator of the COB mRNA; interacts with translating ribosomes, acts on the COB mRNA 5'-untranslated leader	0.982965	9.0982	0		X			0.0003	0.9656	0.0009		X						0.9656
CBT1	YKL208W	Protein involved in 5' RNA end processing; substrates include mitochondrial COB, 15S_rRNA, and RPM1 transcripts; may also have a role in 3' end processing of the COB pre-mRNA; displays genetic interaction with cell cycle-regulated kinase Dbf2p	0.218188	2.83889	0.115354			X		0	0.4947	0.2985		X						0.4947
CCA1	YER168C	ATP (CTP):tRNA-specific tRNA nucleotidyltransferase; different forms targeted to the nucleus, cytosol, and mitochondrion are generated via the use of multiple transcriptional and translational start sites	0.97841	0.0677369	0.29142			X		0	0	0.2639		X						0.2639
CCE1	YKL011C	Mitochondrial cruciform cutting endonuclease; cleaves Holliday junctions formed during recombination of mitochondrial DNA; CCE1 has a paralog, MRS1, that arose from the whole genome duplication	1.26294	8.922	0.0419469		X			0.0017	0.953	0.0003		X						0.953
CCM1	YGR150C	Mitochondrial 15S rRNA-binding protein; required for intron removal of COB and COX1 pre-mRNAs; has separable roles in stabilizing mitochondrial 15S rRNA and in maturation of the COB and COX1 mRNAs; contains pentatricopeptide repeat (PPR) motifs; mutant is respiratory deficient and has defective plasma membrane electron transport	0.395205	6.05666	0.179138		X			0	0.9208	0.0294		X						0.9208
CCP1	YKR066C	Mitochondrial cytochrome-c peroxidase; degrades reactive oxygen species in mitochondria, involved in the response to oxidative stress	8.13045	16.3395	0.943113	X				0.9792	0.0059	0			X					0.9792
CCS1	YMR038C	Copper chaperone for superoxide dismutase Sod1p; involved in oxidative stress protection; Met-X-Cys-X2-Cys motif within the N-terminal portion is involved in insertion of copper into Sod1p under conditions of copper deprivation; required for regulation of yeast copper genes in response to DNA-damaging agents; protein abundance increases in response to DNA replication stress	4.00568	7.45047	1.30734	X				0.6099	0.1104	0			X					0.6099
CDC19	YAL038W	Pyruvate kinase; functions as a homotetramer in glycolysis to convert phosphoenolpyruvate to pyruvate, the input for aerobic (TCA cycle) or anaerobic (glucose fermentation) respiration; regulated via allosteric activation by fructose bisphosphate; CDC19 has a paralog, PYK2, that arose from the whole genome duplication	0.853126	2.97601	39.9952				X	0	0.3177	0.2268								0.3177
CDC20	YGL116W	Activator of anaphase-promoting complex/cyclosome (APC/C); APC/C is required for metaphase/anaphase transition; directs ubiquitination of mitotic cyclins, Pds1p, and other anaphase inhibitors; cell-cycle regulated; potential Cdc28p substrate; relative distribution to the nucleus increases upon DNA replication stress	0.978857	3.73092	##				X	0	0.5795	0.0642								0.5795
CDC42	YLR229C	Small rho-like GTPase; essential for establishment and maintenance of cell polarity; plays a role late in cell fusion via activation of key cell fusion regulator Fus2p; mutants have defects in the organization of actin and septins	0.533319	0.796325	1.5027			X		0	0	0.9194	X							0.9194
CDC48	YDL126C	AAA ATPase; subunit of polyubiquitin-selective segregase complex involved in ERAD, cell wall integrity during heat stress, mitotic spindle disassembly; subunit of complex involved in mitochondria-associated degradation; role in mobilizing membrane bound transcription factors by regulated ubiquitin/proteasome-dependent processing, in macroautophagy, PMN, RAD, ribophagy, homotypic ER membrane fusio…	0.549236	4.15009	97.8662		X			0	0.7705	0.1167	X							0.7705
CDC9	YDL164C	DNA ligase found in the nucleus and mitochondria; an essential enzyme that joins Okazaki fragments during DNA replication; also acts in ribonucleotide excision repair, base excision repair, and recombination,	0.624103	18.392	0.475835		X			0	0.9526	0.0007		X						0.9526
CDS1	YBR029C	Phosphatidate cytidylyltransferase (CDP-diglyceride synthetase); an enzyme that catalyzes that conversion of CTP + phosphate into diphosphate + CDP-diaclglyerol, a critical step in the synthesis of all major yeast phospholipids	0.756204	20.00**	1.35243		X			#N/A	#N/A	#N/A		X						#N/A
CEM1	YER061C	Mitochondrial beta-keto-acyl synthase; possible role in fatty acid synthesis; required for mitochondrial respiration	8.04188	9.33618	0.380288	X				0.9439	0.0021	0				X				0.9439
CHO1	YER026C	Phosphatidylserine synthase; functions in phospholipid biosynthesis; catalyzes the reaction CDP-diaclyglycerol + L-serine = CMP + L-1-phosphatidylserine, transcriptionally repressed by myo-inositol and choline	0.386967	0.319601	0			X		0	0	0.9674		X						0.9674
CIR1	YGR207C	Mitochondrial protein that interacts with frataxin (Yfh1p); putative ortholog of mammalian electron transfer flavoprotein complex subunit ETF-beta; may have a role in oxidative stress response	8.66547	22.7622	0.413769	X				0.9708	0.0121	0				X				0.9708
CIR2	YOR356W	Putative ortholog of human ETF-dH; found in a large supramolecular complex with other mitochondrial dehydrogenases; may have a role in oxidative stress response; ETF-dH is also known as electron transfer flavoprotein dehydrogenase	0.562463	12.678	0.261312		X			0	0.9663	0.0019		X						0.9663
CIT1	YNR001C	Citrate synthase; catalyzes the condensation of acetyl coenzyme A and oxaloacetate to form citrate; the rate-limiting enzyme of the TCA cycle; nuclear encoded mitochondrial protein; CIT1 has a paralog, CIT2, that arose from the whole genome duplication	20.1221	27.8855	0.309761	X				0.9613	0.0007	0				X				0.9613
CIT2	YCR005C	Citrate synthase; catalyzes the condensation of acetyl coenzyme A and oxaloacetate to form citrate, peroxisomal isozyme involved in glyoxylate cycle; expression is controlled by Rtg1p and Rtg2p transcription factors; CIT2 has a paralog, CIT1, that arose from the whole genome duplication	13.9195	19.7972	0.333149	X				0.9843	0.0008	0				X				0.9843
CIT3	YPR001W	Dual specificity mitochondrial citrate and methylcitrate synthase; catalyzes the condensation of acetyl-CoA and oxaloacetate to form citrate and that of propionyl-CoA and oxaloacetate to form 2-methylcitrate	14.2237	25.7609	0.439348	X				0.9765	0.0021	0				X				0.9765
CLD1	YGR110W	Mitochondrial cardiolipin-specific phospholipase; functions upstream of Taz1p to generate monolyso-cardiolipin; transcription increases upon genotoxic stress; involved in restricting Ty1 transposition; has homology to mammalian CGI-58	0.570744	2.5691	0.103302			X		0	0.1865	0.5702		X						0.5702
CMC1	YKL137W	Copper-binding protein of the mitochondrial intermembrane space; evolutionarily conserved; may be involved in delivering copper from the matrix to the cytochrome c oxidase complex; contains a twin CX9C motif	6.67908	30.8472	0.221479	X				0.8365	0.1171	0			X					0.8365
CMC2	YBL059C-A	Protein involved in respiratory chain complex assembly or maintenance; protein of the mitochondrial intermembrane space; contains twin Cx9C motifs that can form coiled coil-helix-coiled-coil helix fold	10.5156	9.44907	0.410147	X				0.949	0.0004	0			X					0.949
CMC4	YMR194C-B	Protein that localizes to the mitochondrial intermembrane space; localizes via the Mia40p-Erv1p system; contains twin cysteine-x(9)-cysteine motifs	11.0654	8.55246	0.276849	X				0.9204	0.0003	0			X					0.9204
CMD1	YBR109C	Calmodulin; Ca++ binding protein that regulates Ca++ independent processes (mitosis, bud growth, actin organization, endocytosis, etc.) and Ca++ dependent processes (stress-activated pathways), targets include Nuf1p, Myo2p and calcineurin	5.36146	5.12671	7.21295	X				0.24	0.0075	0				X				0.24
COA1	YIL157C	Mitochondrial inner membrane protein; required for assembly of the cytochrome c oxidase complex (complex IV); interacts with complex IV assembly factor Shy1p during the early stages of assembly	0.346143	1.75346	0.224472			X		0	0.0246	0.8555		X						0.8555
COA3	YJL062W-A	Mitochondrial protein required for cytochrome c oxidase assembly; also involved in translational regulation of Cox1p and prevention of Cox1p aggregation before assembly; located in the mitochondrial inner membrane	0.273715	1.85587	0			X		0	0.0557	0.7945		X						0.7945
COA4	YLR218C	Twin Cx(9)C protein involved in cytochrome c oxidase organization; organization includes assembly or stability; localizes to the mitochondrial intermembrane space via the Mia40p-Erv1p system; interacts genetically with CYC1 and with cytochrome c oxidase assembly factors	17.4798	1.5284	0.692123				X	0	0	0			X					0
COA6	YMR244C-A	Protein involved in cytochrome c oxidase (Complex IV) assembly; involved in delivery of copper to Complex IV; also required for efficient formation of respiratory supercomplexes comprised of Complexes III and IV; localizes to the mitochondrial intermembrane space; ortholog implicated in cardiac defects in zebrafish and human; transcription is induced in response to the DNA-damaging agent MMS; pro…	22.0441	22.1794	0.3912	X				0.9694	0.0002	0			X					0.9694
COF1	YLL050C	Cofilin, involved in pH-dependent actin filament depolarization; binds both actin monomers and filaments and severs filaments; involved in the selective sorting, export of the secretory cargo from the late golgi; genetically interacts with pmr1; thought to be regulated by phosphorylation at SER4; ubiquitous and essential in eukaryotes	1.36242	4.24836	19.3848				X	0.0003	0.5543	0.0094								0.5543
COQ1	YBR003W	Hexaprenyl pyrophosphate synthetase; catalyzes the first step in ubiquinone (coenzyme Q) biosynthesis	0.458425	7.85754	0.293628		X			0	0.9534	0.0104		X						0.9534
COQ10	YOL008W	Coenzyme Q (ubiquinone) binding protein; functions in the delivery of Q<sub>6</sub> to its proper location for electron transport during respiration; START domain protein with homologs in bacteria and eukaryotes	0.291709	6.75367	0		X			0	0.919	0.0207		X						0.919
COQ2	YNR041C	Para hydroxybenzoate polyprenyl transferase; catalyzes the second step in ubiquinone (coenzyme Q) biosynthesis; human COQ2, mutations in which are implicated in an increased risk of mutiple-system atrophy, is able to complement a yeast coq2 null mutant	0.188165	0.130256	0.230708			X		0	0	0.9436		X						0.9436
COQ3	YOL096C	O-methyltransferase; catalyzes two different O-methylation steps in ubiquinone (Coenzyme Q) biosynthesis; component of a mitochondrial ubiquinone-synthesizing complex; phosphoprotein	1.3566	9.62786	0.498329		X			0.0031	0.9538	0.0002		X						0.9538
COQ4	YDR204W	Protein with a role in ubiquinone (Coenzyme Q) biosynthesis; possibly functioning in stabilization of Coq7p; located on the matrix face of the mitochondrial inner membrane; component of a mitochondrial ubiquinone-synthesizing complex	1.54547	8.84576	0		X			0.0071	0.9301	0.0001		X						0.9301
COQ5	YML110C	2-hexaprenyl-6-methoxy-1,4-benzoquinone methyltransferase; involved in ubiquinone (Coenzyme Q) biosynthesis; localizes to the matrix face of the mitochondrial inner membrane in a large complex with other ubiquinone biosynthetic enzymes	2.52536	13.4153	0.205074		X			0.1862	0.7554	0		X						0.7554
COQ6	YGR255C	Putative flavin-dependent monooxygenase; involved in ubiquinone (Coenzyme Q) biosynthesis; localizes to the matrix face of the mitochondrial inner membrane in a large complex with other ubiquinone biosynthetic enzymes; human COX6 can rescue a yeast cox6 mutant and is implicated in steroid-resistant nephrotic syndrome (SRNS)	2.05539	12.626	0.312572		X			0.059	0.8912	0		X						0.8912
COQ8	YGL119W	Protein required for ubiquinone biosynthesis and respiratory growth; exhibits genetic interaction with COQ9, suggesting a common function; similar to prokaryotic proteins involved in early steps of ubiquinone biosynthesis; COQ8 has a paralog, YBR230W-A, that arose from the whole genome duplication	0.530328	7.63107	0.262278		X			0	0.9559	0.0093		X						0.9559
COQ9	YLR201C	Protein required for ubiquinone biosynthesis and respiratory growth; localizes to the matrix face of the mitochondrial inner membrane in a large complex with ubiquinone biosynthetic enzymes; ubiquinone is also known as coenzyme Q	2.04076	15.8292	0.30761		X			0.0516	0.9099	0		X						0.9099
COR1	YBL045C	Core subunit of the ubiquinol-cytochrome c reductase complex; the ubiquinol-cytochrome c reductase complex (bc1 complex) is a component of the mitochondrial inner membrane electron transport chain	1.85161	19.9125	0.443643		X			0.023	0.9427	0		X						0.9427
COX1	Q0045	Subunit I of cytochrome c oxidase (Complex IV); Complex IV is the terminal member of the mitochondrial inner membrane electron transport chain; one of three mitochondrially-encoded subunits	0.228792	0.061595	0.0384513			X		0	0	0.9377		X						0.9377
COX10	YPL172C	Heme A:farnesyltransferase; catalyzes the first step in the conversion of protoheme to the heme A prosthetic group required for cytochrome c oxidase activity; human ortholog is associated with mitochondrial disorders	0.304404	0.149371	0			X		0	0	0.969		X						0.969
COX11	YPL132W	Protein required for delivery of copper to Cox1p; mitochondrial inner membrane protein; association with mitochondrial ribosomes suggests that copper delivery may occur during translation of Cox1p	0.242249	1.54584	0.116744			X		0	0.0217	0.8337		X	X					0.8337
COX12	YLR038C	Subunit VIb of cytochrome c oxidase; cytochrome c oxidase is also known as respiratory Complex IV and is the terminal member of the mitochondrial inner membrane electron transport chain; required for assembly of cytochrome c oxidase but not required for activity after assembly; phosphorylated; easily released from the intermembrane space, suggesting a loose association with Complex IV	2.62703	16.0303	0.388962		X			0.2022	0.7493	0		X	X					0.7493
COX13	YGL191W	Subunit VIa of cytochrome c oxidase; present in a subclass of cytochrome c oxidase complexes that may have a role in mimimizing generation of reactive oxygen species; not essential for cytochrome c oxidase activity but may modulate activity in response to ATP; required for assembly of Rcf2p into cytochrome c oxidase - cytochrome bc1 supercomplexes	0.350404	7.31883	0.373098		X			0	0.9368	0.0162		X						0.9368
COX14	YML129C	Mitochondrial cytochrome c oxidase (complex IV) assembly factor; also involved in translational regulation of Cox1p and prevention of Cox1p aggregation before assembly; associates with complex IV assembly intermediates and complex III/complex IV supercomplexes; located in the mitochondrial membrane	0.397116	2.58171	0			X		0	0.2243	0.6104		X						0.6104
COX15	YER141W	Protein required for the hydroxylation of heme O to form heme A; heme A is an essential prosthetic group for cytochrome c oxidase	0.174883	0.128889	0.070987			X		0	0	0.9323		X						0.9323
COX16	YJL003W	Mitochondrial inner membrane protein; required for assembly of cytochrome c oxidase	0.499996	0.6089	0			X		0	0	0.9403		X						0.9403
COX17	YLL009C	Copper metallochaperone that transfers copper to Sco1p and Cox11p; eventual delivery to cytochrome c oxidase; contains twin cysteine-x9-cysteine motifs	18.0149	25.2506	0.30761	X				0.9733	0.0007	0			X					0.9733
COX18	YGR062C	Protein required for membrane insertion of C-terminus of Cox2p; mitochondrial integral inner membrane protein; interacts genetically and physically with Mss2p and Pnt1p; similar to S. cerevisiae Oxa1, N. crassa Oxa2p, and E. coli YidC	0.234962	0.23667	0			X		0	0	0.9645		X						0.9645
COX19	YLL018C-A	Protein required for cytochrome c oxidase assembly; located in the cytosol and mitochondrial intermembrane space; putative copper metallochaperone that delivers copper to cytochrome c oxidase; contains twin cysteine-x9-cysteine motifs	12.2802	7.68015	0.692123	X				0.8583	0.0001	0			X					0.8583
COX2	Q0250	Subunit II of cytochrome c oxidase (Complex IV); Complex IV is the terminal member of the mitochondrial inner membrane electron transport chain; one of three mitochondrially-encoded subunits	0.209908	0.104483	0.110547			X		0	0	0.9509		X						0.9509
COX20	YDR231C	Mitochondrial inner membrane protein; required for proteolytic processing of Cox2p and its assembly into cytochrome c oxidase	0.302477	0.113328	0.607126			X		0	0	0.965		X						0.965
COX23	YHR116W	Protein that functions in mitochondrial copper homeostasis; mitochondrial intermembrane space protein; essential for functional cytochrome oxidase expression; homologous to Cox17p; contains twin cysteine-x9-cysteine motifs	14.1622	19.9172	0.30761	X				0.9841	0.0007	0			X					0.9841
COX26	YDR119W-A	Putative protein of unknown function; copurifies with respiratory chain supercomplexes composed of Complex III (ubiquinol-cytochrome c reductase) and Complex IV (cytochrome c oxidase)	0.357115	1.25002	0.184566			X		0	0.0016	0.9189		X						0.9189
COX3	Q0275	Subunit III of cytochrome c oxidase (Complex IV); Complex IV is the terminal member of the mitochondrial inner membrane electron transport chain; one of three mitochondrially-encoded subunits	--	0.203255	0			X		#N/A	#N/A	#N/A		X						#N/A
COX4	YGL187C	Subunit IV of cytochrome c oxidase; the terminal member of the mitochondrial inner membrane electron transport chain; precursor N-terminal 25 residues are cleaved during mitochondrial import; phosphorylated; spermidine enhances translation	3.80036	6.3293	0.36821				X	0.3788	0.1099	0								0.3788
COX5A	YNL052W	Subunit Va of cytochrome c oxidase; cytochrome c oxidase is the terminal member of the mitochondrial inner membrane electron transport chain; Cox5Ap is predominantly expressed during aerobic growth while its isoform Vb (Cox5Bp) is expressed during anaerobic growth; COX5A has a paralog, COX5B, that arose from the whole genome duplication	0.453764	0.735293	0.279128			X		0	0	0.9429		X						0.9429
COX5B	YIL111W	Subunit Vb of cytochrome c oxidase; cytochrome c oxidase is the terminal member of the mitochondrial inner membrane electron transport chain; Cox5Bp is predominantly expressed during anaerobic growth while its isoform Va (Cox5Ap) is expressed during aerobic growth; COX5B has a paralog, COX5A, that arose from the whole genome duplication	0.835046	0.821694	0			X		0	0	0.7007		X						0.7007
COX6	YHR051W	Subunit VI of cytochrome c oxidase (Complex IV); Complex IV is the terminal member of the mitochondrial inner membrane electron transport chain; expression is regulated by oxygen levels	3.52536	4.92086	0.583407				X	0.0862	0.06	0								0.0862
COX7	YMR256C	Subunit VII of cytochrome c oxidase (Complex IV); Complex IV is the terminal member of the mitochondrial inner membrane electron transport chain	0.315949	0.130146	0.512684			X		0	0	0.9671		X						0.9671
COX8	YLR395C	Subunit VIII of cytochrome c oxidase (Complex IV); Complex IV is the terminal member of the mitochondrial inner membrane electron transport chain	0.26822	0.901874	0.1695			X		0	0.0002	0.9343		X						0.9343
COX9	YDL067C	Subunit VIIa of cytochrome c oxidase (Complex IV); Complex IV is the terminal member of the mitochondrial inner membrane electron transport chain	0.292008	0.0990334	0.164233			X		0	0	0.9621		X						0.9621
CPR1	YDR155C	Cytoplasmic peptidyl-prolyl cis-trans isomerase (cyclophilin); catalyzes the cis-trans isomerization of peptide bonds N-terminal to proline residues; binds the drug cyclosporin A; N-terminally propionylated in vivo; protein abundance increases in response to DNA replication stress	8.64352	8.24296	20.4522	X				0.9086	0.0011	0			X					0.9086
CPR3	YML078W	Mitochondrial peptidyl-prolyl cis-trans isomerase (cyclophilin); catalyzes the cis-trans isomerization of peptide bonds N-terminal to proline residues; involved in protein refolding after import into mitochondria	16.8387	17.2476	0.581087	X				0.9814	0.0002	0				X				0.9814
CPR5	YDR304C	Peptidyl-prolyl cis-trans isomerase (cyclophilin) of the ER; catalyzes the cis-trans isomerization of peptide bonds N-terminal to proline residues; transcriptionally induced in response to unfolded proteins in the ER; CPR5 has a paralog, CPR2, that arose from the whole genome duplication	6.20558	4.75719	6.06543				X	0.1683	0.002	0								0.1683
CRC1	YOR100C	Mitochondrial inner membrane carnitine transporter; required for carnitine-dependent transport of acetyl-CoA from peroxisomes to mitochondria during fatty acid beta-oxidation	0.178909	0.0731825	0			X		0	0	0.9175		X						0.9175
CRD1	YDL142C	Cardiolipin synthase; produces cardiolipin, which is a phospholipid of the mitochondrial inner membrane that is required for normal mitochondrial membrane potential and function; required to maintain tubular mitochondrial morphology and functions in mitochondrial fusion; also required for normal vacuolar ion homeostasis	0.139652	0.030628	0			X		0	0	0.6884		X						0.6884
CRP1	YHR146W	Protein that binds to cruciform DNA structures; CRP1 has a paralog, MDG1, that arose from the whole genome duplication	5.01788	4.91016	8.94105				X	0.1685	0.0088	0								0.1685
CTP1	YBR291C	Mitochondrial inner membrane citrate transporter; member of the mitochondrial carrier family	0.320549	0.660845	0.178612			X		0	0	0.957		X						0.957
CWH41	YGL027C	Processing alpha glucosidase I; ER type II integral membrane N-glycoprotein involved in assembly of cell wall beta 1,6 glucan and asparagine-linked protein glycosylation; also involved in ER protein quality control and sensing of ER stress	1.1868	29.152	6.41151		X			0.0009	0.9374	0		X						0.9374
CYB2	YML054C	Cytochrome b2 (L-lactate cytochrome-c oxidoreductase); component of the mitochondrial intermembrane space, required for lactate utilization; expression is repressed by glucose and anaerobic conditions	11.556	24.3915	0.543631	X				0.9781	0.0042	0			X					0.9781
CYC1	YJR048W	Cytochrome c, isoform 1; also known as iso-1-cytochrome c; electron carrier of the mitochondrial intermembrane space that transfers electrons from ubiquinone-cytochrome c oxidoreductase to cytochrome c oxidase during cellular respiration; mutations in human homolog cause insulin-responsive hyperglycemia; CYC1 has a paralog, CYC7, that arose from the whole genome duplication	27.8396	18.4155	0.450506	X				0.9497	0	0			X					0.9497
CYC2	YOR037W	Mitochondrial peripheral inner membrane protein; contains a FAD cofactor in a domain exposed in the intermembrane space; exhibits redox activity in vitro; likely participates in ligation of heme to acytochromes c and c1 (Cyc1p and Cyt1p)	0.234863	4.86529	0		X			0	0.8512	0.0501		X						0.8512
CYC3	YAL039C	Cytochrome c heme lyase (holocytochrome c synthase); attaches heme to apo-cytochrome c (Cyc1p or Cyc7p) in the mitochondrial intermembrane space; human ortholog may have a role in microphthalmia with linear skin defects (MLS)	0.425808	5.96607	0.299576		X			0	0.9207	0.0298		X	X					0.9207
CYC7	YEL039C	Cytochrome c isoform 2, expressed under hypoxic conditions; also known as iso-2-cytochrome c; electron carrier of the mitochondrial intermembrane space that transfers electrons from ubiquinone-cytochrome c oxidoreductase to cytochrome c oxidase during cellular respiration; protein abundance increases in response to DNA replication stress; CYC7 has a paralog, CYC1, that arose from the whole genome…	34.7575	32.343	0.845928	X				0.814	0.0002	0			X					0.814
CYM1	YDR430C	Lysine-specific metalloprotease of the pitrilysin family; metalloprotease of the intermembrane space; degrades proteins and presequence peptides cleaved from imported proteins; required for normal mitochondrial morphology	6.43504	16.4491	0.280445	X				0.9603	0.0208	0				X				0.9603
CYT1	YOR065W	Cytochrome c1; component of the mitochondrial respiratory chain; expression is regulated by the heme-activated, glucose-repressed Hap2p/3p/4p/5p CCAAT-binding complex	0.247895	0.101978	0.440625			X		0	0	0.9599		X						0.9599
CYT2	YKL087C	Cytochrome c1 heme lyase; involved in maturation of cytochrome c1, which is a subunit of the mitochondrial ubiquinol-cytochrome-c reductase; links heme covalently to apocytochrome c1	0.314771	0.177569	0			X		0	0	0.9704		X						0.9704
DFM1	YDR411C	Endoplasmic reticulum (ER) localized protein; involved in ER-associated protein degradation (ERAD), ER stress, and homeostasis; interacts with components of ERAD-L and ERAD-C and Cdc48p; derlin-like family member similar to Der1p	0.629969	0.531915	3.30593			X		0	0	0.8999		X						0.8999
DFR1	YOR236W	Dihydrofolate reductase involved in tetrahydrofolate biosynthesis; required for respiratory metabolism	7.33141	20.00**	0.263666	X				#N/A	#N/A	#N/A				X				#N/A
DIA4	YHR011W	Probable mitochondrial seryl-tRNA synthetase; mutant displays increased invasive and pseudohyphal growth	2.30114	12.7071	0.233957		X			0.1149	0.8277	0		X						0.8277
DIC1	YLR348C	Mitochondrial dicarboxylate carrier; integral membrane protein, catalyzes a dicarboxylate-phosphate exchange across the inner mitochondrial membrane, transports cytoplasmic dicarboxylates into the mitochondrial matrix	0.192724	0.394443	0.359904			X		0	0	0.937		X						0.937
DID2	YKR035W-A	Class E protein of the vacuolar protein-sorting (Vps) pathway; binds Vps4p and directs it to dissociate ESCRT-III complexes; forms a functional and physical complex with Ist1p; human ortholog may be altered in breast tumors	3.0884	5.12195	2.0113				X	0.0756	0.1319	0								0.1319
DLD1	YDL174C	D-lactate dehydrogenase; oxidizes D-lactate to pyruvate, transcription is heme-dependent, repressed by glucose, and derepressed in ethanol or lactate; located in the mitochondrial inner membrane	0.342272	4.60571	0.256744		X			0	0.8359	0.0854		X						0.8359
DLD2	YDL178W	D-lactate dehydrogenase; located in the mitochondrial matrix	16.6143	15.4185	0.24651	X				0.9799	0.0001	0				X				0.9799
DNF1	YER166W	Aminophospholipid translocase (flippase); type 4 P-type ATPase; involved in phospholipid translocation, contributing to endocytosis, protein transport, and cellular polarization; localizes primarily to the plasma membrane; localizes to the shmoo tip where it has a redundant role in the cellular response to mating pheromone; DNF1 has a paralog, DNF2, that arose from the whole genome duplication	0.291431	1.04245	8.53619			X		0	0.0006	0.9292		X						0.9292
DPM1	YPR183W	Dolichol phosphate mannose (Dol-P-Man) synthase of the ER membrane; catalyzes the formation of Dol-P-Man from Dol-P and GDP-Man; required for glycosyl phosphatidylinositol membrane anchoring, O mannosylation, and protein glycosylation	0.31339	0.491254	1.74761			X		0	0	0.9646	X							0.9646
DSS1	YMR287C	3'-5' exoribonuclease; component of the mitochondrial degradosome along with the ATP-dependent RNA helicase Suv3p; the degradosome associates with the ribosome and mediates turnover of aberrant or unprocessed RNAs	0.910002	3.75652	0.188761				X	0	0.6151	0.0773								0.6151
DUG1	YFR044C	Cys-Gly metallo-di-peptidase; forms a complex with Dug2p and Dug3p to degrade glutathione (GSH) and other peptides containing a gamma-glu-X bond in an alternative pathway to GSH degradation by gamma-glutamyl transpeptidase (Ecm38p)	5.85695	6.46766	2.52625	X				0.6488	0.0094	0				X				0.6488
ECM10	YEL030W	Heat shock protein of the Hsp70 family; localized in mitochondrial nucleoids, plays a role in protein translocation, interacts with Mge1p in an ATP-dependent manner; overexpression induces extensive mitochondrial DNA aggregations; ECM10 has a paralog, SSC1, that arose from the whole genome duplication	1.2639	4.64045	0.85292		X			0.0003	0.7	0.0086		X						0.7
ECM19	YLR390W	Putative protein of unknown function; the authentic, non-tagged protein is detected in highly purified mitochondria in high-throughput studies	1.18396	15.8288	0.419469		X			0.0016	0.9722	0.0001		X						0.9722
ECM31	YBR176W	Ketopantoate hydroxymethyltransferase; required for pantothenic acid biosynthesis, converts 2-oxoisovalerate into 2-dehydropantoate	8.15651	17.7851	0.170369	X				0.978	0.0074	0				X				0.978
ECM33	YBR078W	GPI-anchored protein of unknown function; possible role in apical bud growth; GPI-anchoring on the plasma membrane crucial to function; phosphorylated in mitochondria; similar to Sps2p; ECM33 has a paralog, PST1, that arose from the whole genome duplication	0.83544	0.158274	0.230708			X		0	0	0.6888		X						0.6888
ECM4	YKR076W	Omega class glutathione transferase; not essential; similar to Ygr154cp; green fluorescent protein (GFP)-fusion protein localizes to the cytoplasm	12.5838	11.2701	1.64413	X				0.9703	0.0002	0				X				0.9703
EDE1	YBL047C	Scaffold protein involved in the formation of early endocytic sites; putative regulator of cytokinesis; homo-oligomerization is required for localization to and organization of endocytic sites; has a network of interactions with other endocytic proteins; binds membranes in a ubiquitin-dependent manner; may also bind ubiquitinated membrane-associated proteins; interacts with Cmk2 and functions ups…	1.60932	6.9715	166.799		X			0.0063	0.8646	0.0003		X						0.8646
EFR3	YMR212C	Protein required for Stt4-containing PI kinase complex localization; required for Stt4-containing phosphoinositide (PI) kinase patch assembly at the plasma membrane; recruited to the plasma membrane via a conserved basic patch near its N-terminus; exhibits synthetic lethal genetic interactions with PHO85; has sequence similarity to the Drosophila rolling blackout (RBO) gene	0.488359	10.1217	0.811455		X			0	0.9628	0.0045		X						0.9628
EHD3	YDR036C	3-hydroxyisobutyryl-CoA hydrolase; member of a family of enoyl-CoA hydratase/isomerases; non-tagged protein is detected in highly purified mitochondria in high-throughput studies; phosphorylated; mutation affects fluid-phase endocytosis	7.06312	12.56	0.202264	X				0.9691	0.0071	0				X				0.9691
EHT1	YBR177C	Acyl-coenzymeA:ethanol O-acyltransferase; plays a minor role in medium-chain fatty acid ethyl ester biosynthesis; possesses short-chain esterase activity; localizes to lipid particles and the mitochondrial outer membrane; EHT1 has a paralog, EEB1, that arose from the whole genome duplication	0.636507	9.55275	0.433166		X			0	0.9689	0.003	X							0.9689
EIS1	YMR031C	Component of the eisosome required for proper eisosome assembly; similar to Uso1p; authentic, non-tagged protein is detected in a phosphorylated state in highly purified mitochondria in high-throughput studies; protein increases in abundance and relocalizes from plasma membrane to cytoplasm upon DNA replication stress; EIS1 has a paralog, YKL050C, that arose from the whole genome duplication	3.56099	6.11122	16.9698				X	0.2874	0.1372	0								0.2874
EMI1	YDR512C	Non-essential protein of unknown function; required for transcriptional induction of the early meiotic-specific transcription factor IME1, also required for sporulation; contains twin cysteine-x9-cysteine motifs	1.00685	4.43087	0.0450809		X			0	0.7527	0.0254		X						0.7527
ENO1	YGR254W	Enolase I, a phosphopyruvate hydratase; catalyzes conversion of 2-phosphoglycerate to phosphoenolpyruvate during glycolysis and the reverse reaction during gluconeogenesis; expression repressed in response to glucose; protein abundance increases in response to DNA replication stress; N-terminally propionylated in vivo; ENO1 has a paralog, ENO2, that arose from the whole genome duplication	1.55349	4.83021	91.6104				X	0.0015	0.6154	0.0026								0.6154
ENO2	YHR174W	Enolase II, a phosphopyruvate hydratase; catalyzes conversion of 2-phosphoglycerate to phosphoenolpyruvate during glycolysis and the reverse reaction during gluconeogenesis; expression induced in response to glucose; ENO2 has a paralog, ENO1, that arose from the whole genome duplication	0.852549	3.85142	79.7539				X	0	0.6629	0.0815								0.6629
ERG26	YGL001C	C-3 sterol dehydrogenase; catalyzes the second of three steps required to remove two C-4 methyl groups from an intermediate in ergosterol biosynthesis	0.424155	5.09814	2.04367		X			0	0.88	0.0561		X						0.88
ERG27	YLR100W	3-keto sterol reductase; catalyzes the last of three steps required to remove two C-4 methyl groups from an intermediate in ergosterol biosynthesis; mutants are sterol auxotrophs	0.562047	3.1731	1.26388				X	0	0.4578	0.3392	X							0.4578
ERG28	YER044C	Endoplasmic reticulum membrane protein; may facilitate protein-protein interactions between the Erg26p dehydrogenase and the Erg27p 3-ketoreductase and/or tether these enzymes to the ER, also interacts with Erg6p	0.474055	0.70314	0.983584			X		0	0	0.9408	X							0.9408
ERG6	YML008C	Delta(24)-sterol C-methyltransferase; converts zymosterol to fecosterol in the ergosterol biosynthetic pathway by methylating position C-24; localized to lipid particles, the plasma membrane-associated endoplasmic reticulum, and the mitochondrial outer membrane	0.425514	12.8956	1.4394		X			0	0.9495	0.0034	X							0.9495
ERG9	YHR190W	Farnesyl-diphosphate farnesyl transferase (squalene synthase); joins two farnesyl pyrophosphate moieties to form squalene in the sterol biosynthesis pathway	0.290176	0.358662	0.887338			X		0	0	0.9684	X							0.9684
ERJ5	YFR041C	Type I membrane protein with a J domain; required to preserve the folding capacity of the endoplasmic reticulum; loss of the non-essential ERJ5 gene leads to a constitutively induced unfolded protein response	0.46291	0.05**	3.15566			X		#N/A	#N/A	#N/A		X						#N/A
ERO1	YML130C	Thiol oxidase required for oxidative protein folding in the ER; essential for maintaining proper redox balance in ER; feedback regulation of Ero1p occurs via reduction and oxidation of Ero1p regulatory bonds; reduced Pdi1p activates Ero1p by direct reduction of Ero1p regulatory bonds; depletion of thiol substrates and accumulation of oxidized Pdi1p results in inactivation of Ero1p by both Pdi1p-m…	1.3948	0.24133	1.80324				X	0	0	0.0913								0.0913
ERP1	YAR002C-A	Member of the p24 family involved in ER to Golgi transport; role in misfolded protein quality control; forms heterotrimeric complex with Erp2p, Emp24p, and Erv25p; localized to COPII-coated vesicles; ERP1 has a paralog, ERP6, that arose from the whole genome duplication	2.00175	0.26457	4.15274				X	0	0	0.0045								0.0045
ERV1	YGR029W	Flavin-linked sulfhydryl oxidase of the mitochondrial IMS; N-terminus is an intrinsically disordered domain that in the cytosol helps target Erv1p to mitochondria, and in the intermembrane space oxidizes Mia40p as part of a disulfide relay system that promotes intermembrane space retention of imported proteins; functional ortholog of human GFER (ALR)	8.81834	11.1064	1.19549	X				0.97	0.0016	0			X					0.97
ERV25	YML012W	Member of the p24 family involved in ER to Golgi transport; role in misfolded protein quality control;	0.426854	0.208094	1.27729			X		0	0	0.9627	X							0.9627
ESBP6	YNL125C	Protein with similarity to monocarboxylate permeases; appears not to be involved in transport of monocarboxylates such as lactate, pyruvate or acetate across the plasma membrane	0.709124	0.05**	0.65141			X		#N/A	#N/A	#N/A		X						#N/A
ETR1	YBR026C	2-enoyl thioester reductase; member of the medium chain dehydrogenase/reductase family; localized to in mitochondria, where it has a probable role in fatty acid synthesis	24.3541	23.5995	0.734498	X				0.9597	0.0001	0				X				0.9597
EXG2	YDR261C	Exo-1,3-beta-glucanase; involved in cell wall beta-glucan assembly; may be anchored to the plasma membrane via a glycosylphosphatidylinositol (GPI) anchor	0.787842	0.75679	0			X		0	0	0.7618		X						0.7618
EXO5	YBR163W	Mitochondrial 5'-3' exonuclease and sliding exonuclease; required for mitochondrial genome maintenance; distantly related to the RecB nuclease domain of bacterial RecBCD recombinases; may be regulated by the transcription factor Ace2	2.6586	13.9992	0		X			0.2347	0.7082	0		X						0.7082
FAA1	YOR317W	Long chain fatty acyl-CoA synthetase; activates imported fatty acids with a preference for C12:0-C16:0 chain lengths; functions in long chain fatty acid import; accounts for most acyl-CoA synthetase activity; localized to lipid particles; involved in sphingolipid-to-glycerolipid metabolism; forms ER foci upon DNA replication stress; FAA1 has a paralog, FAA4, that arose from the whole genome dupli…	0.677091	9.40555	1.64342		X			0	0.9692	0.0027	X							0.9692
FAA3	YIL009W	Long chain fatty acyl-CoA synthetase; activates imported fatty acids; green fluorescent protein (GFP)-fusion protein localizes to the cell periphery	1.4205	5.80699	0		X			0.0016	0.8202	0.0016		X						0.8202
FAA4	YMR246W	Long chain fatty acyl-CoA synthetase; activates imported fatty acids with a preference for C12:0-C16:0 chain lengths; functions in long chain fatty acid import; important for survival during stationary phase; localized to lipid particles; involved in sphingolipid-to-glycerolipid metabolism; forms cytoplasmic foci upon DNA replication stress; FAA4 has a paralog, FAA1, that arose from the whole gen…	0.492016	3.40879	4.9393		X			0	0.5626	0.2828		X						0.5626
FAR8	YMR029C	Protein involved in recovery from arrest in response to pheromone; acts in a cell cycle arrest recovery pathway independent from Far1p; interacts with Far3p, Far7p, Far9p, Far10p, and Far11p	2.42057	3.67823	0.854165				X	0.0023	0.0587	0.0002								0.0587
FAS2	YPL231W	Alpha subunit of fatty acid synthetase; complex catalyzes the synthesis of long-chain saturated fatty acids; contains the acyl-carrier protein domain and beta-ketoacyl reductase, beta-ketoacyl synthase and self-pantetheinylation activities	0.53728	9.33767	##		X			0	0.9648	0.0047		X						0.9648
FAT3	YKL187C	Protein required for fatty acid uptake; protein abundance increases in cortical patches in response to oleate exposure; the authentic, non-tagged protein is detected in a phosphorylated state in highly purified mitochondria in high-throughput studies; FAT3 has a paralog, YLR413W, that arose from the whole genome duplication	0.21964	0.158616	0.391768			X		0	0	0.9602		X						0.9602
FAU1	YER183C	5,10-methenyltetrahydrofolate synthetase; involved in folic acid biosynthesis	0.893113	4.27444	0.0601846		X			0	0.7548	0.0434		X						0.7548
FBA1	YKL060C	Fructose 1,6-bisphosphate aldolase; required for glycolysis and gluconeogenesis; catalyzes conversion of fructose 1,6 bisphosphate to glyceraldehyde-3-P and dihydroxyacetone-P; locates to mitochondrial outer surface upon oxidative stress; N-terminally propionylated in vivo	1.54208	4.84168	36.1572				X	0.0014	0.6233	0.0027								0.6233
FIS1	YIL065C	Protein involved in mitochondrial fission and peroxisome abundance; may have a distinct role in tethering protein aggregates to mitochondria in order to retain them in the mother cell; required for localization of Dnm1p and Mdv1p during mitochondrial division; mediates ethanol-induced apoptosis and ethanol-induced mitochondrial fragmentation	0.706796	0.622618	0.425922			X		0	0	0.8472	X							0.8472
FKS1	YLR342W	Catalytic subunit of 1,3-beta-D-glucan synthase; functionally redundant with alternate catalytic subunit Gsc2p; binds to regulatory subunit Rho1p; involved in cell wall synthesis and maintenance; localizes to sites of cell wall remodeling; FKS1 has a paralog, GSC2, that arose from the whole genome duplication	0.11713	0.05**	1.33201			X		#N/A	#N/A	#N/A		X						#N/A
FLX1	YIL134W	Protein required for transport of flavin adenine dinucleotide (FAD); a synthesis product of riboflavin, across the mitochondrial membrane	0.375718	0.1322	0			X		0	0	0.9631		X						0.9631
FMC1	YIL098C	Mitochondrial matrix protein; required for assembly or stability at high temperature of the F1 sector of mitochondrial F1F0 ATP synthase; null mutant temperature sensitive growth on glycerol is suppressed by multicopy expression of Odc1p	4.47382	12.4893	0.450685	X				0.8605	0.0929	0				X				0.8605
FMP10	YER182W	Putative protein of unknown function; the authentic, non-tagged protein is detected in highly purified mitochondria in high-throughput studies	0.227913	0.920647	0.376515			X		0	0.0004	0.9124		X						0.9124
FMP16	YDR070C	Protein of unknown function; may be involved in responding to conditions of stress; the authentic, non-tagged protein is detected in highly purified mitochondria in high-throughput studies; protein abundance increases in response to DNA replication stress	23.1376	36.7553	8.12493	X				0.8835	0.002	0				X				0.8835
FMP23	YBR047W	Putative protein of unknown function; proposed to be involved in iron or copper homeostasis; the authentic, non-tagged protein is detected in highly purified mitochondria in high-throughput studies	1.25456	12.4469	0		X			0.0022	0.9692	0.0001		X						0.9692
FMP25	YLR077W	Protein required for assembly of respiratory complex III; mitochondrial inner membrane protein; required for an early step in assembly of respiratory complex III (cytochrome bc1 complex); mRNA is targeted to mitochondria	0.354955	0.136858	0.137281			X		0	0	0.9657		X						0.9657
FMP30	YPL103C	Protein with a role in maintaining mitochondrial morphology; also involved in maintaining normal cardiolipin levels; mitochondrial inner membrane protein; proposed to be involved in N-acylethanolamine metabolism; related to mammalian N-acylPE-specific phospholipase D	1.02145	1.03829	0.0432577			X		0	0.0001	0.4153		X						0.4153
FMP32	YFL046W	Putative assembly factor for cytochrome c oxidase; the authentic, non-tagged protein is detected in highly purified mitochondria in high-throughput studies; has similarity to human MCUR1/CCDC90A	0.26597	0.217366	0.461416			X		0	0	0.9693		X						0.9693
FMP33	YJL161W	Putative protein of unknown function; the authentic, non-tagged protein is detected in highly purified mitochondria in high-throughput studies	0.363861	0.440924	0.173031			X		0	0	0.9658		X						0.9658
FMP40	YPL222W	Putative protein of unknown function; proposed to be involved in responding to environmental stresses; the authentic, non-tagged protein is detected in highly purified mitochondria in high-throughput studies	2.33417	13.8301	1.35975		X			0.1211	0.8275	0		X						0.8275
FMP41	YNL168C	Putative protein of unknown function; GFP-fusion protein is induced in response to the DNA-damaging agent MMS; the authentic, non-tagged protein is detected in highly purified mitochondria in high-throughput studies	28.0208	28.6697	0.171768	X				0.9205	0.0002	0				X				0.9205
FMP45	YDL222C	Integral membrane protein localized to mitochondria; required for sporulation and maintaining sphingolipid content; similar to SUR7; FMP45 has a paralog, YNL194C, that arose from the whole genome duplication	0.134951	0.280244	54.3317			X		0	0	0.8315		X						0.8315
FMP46	YKR049C	Putative redox protein containing a thioredoxin fold; the authentic, non-tagged protein is detected in highly purified mitochondria in high-throughput studies	6.95862	19.3474	0.922831	X				0.9614	0.0211	0				X				0.9614
FMP52	YER004W	Protein of unknown function; localized to the mitochondrial outer membrane; induced by treatment with 8-methoxypsoralen and UVA irradiation	1.25635	6.8719	1.07329		X			0.001	0.9144	0.0012	X							0.9144
FMT1	YBL013W	Methionyl-tRNA formyltransferase; catalyzes the formylation of initiator Met-tRNA in mitochondria; potential Cdc28p substrate	1.09835	11.0355	0		X			0.0008	0.9704	0.0003		X						0.9704
FOL1	YNL256W	Multifunctional enzyme of the folic acid biosynthesis pathway; has dihydropteroate synthetase, dihydro-6-hydroxymethylpterin pyrophosphokinase, and dihydroneopterin aldolase activities	0.8106	4.84917	0.461416		X			0	0.8538	0.0292		X						0.8538
FOL3	YMR113W	Dihydrofolate synthetase, involved in folic acid biosynthesis; catalyzes conversion of dihydropteroate to dihydrofolate in folate coenzyme biosynthesis; FOL3 has a paralog, RMA1, that arose from the whole genome duplication	1.28213	17.8709	0		X			0.0026	0.9694	0		X						0.9694
FOX2	YKR009C	3-hydroxyacyl-CoA dehydrogenase and enoyl-CoA hydratase; multifunctional enzyme of the peroxisomal fatty acid beta-oxidation pathway	1.89668	11.9882	8.76791		X			0.0356	0.9163	0		X						0.9163
FPR1	YNL135C	Peptidyl-prolyl cis-trans isomerase (PPIase); binds to the drugs FK506 and rapamycin; also binds to the nonhistone chromatin binding protein Hmo1p and may regulate its assembly or function; N-terminally propionylated in vivo	4.22916	9.91533	11.4616	X				0.8047	0.1025	0				X				0.8047
FPR2	YDR519W	Membrane-bound peptidyl-prolyl cis-trans isomerase (PPIase); binds to the drugs FK506 and rapamycin; expression pattern suggests possible involvement in ER protein trafficking; relocalizes from nucleus to vacuole upon DNA replication stress	5.1049	3.85319	5.40971				X	0.0232	0.0016	0								0.0232
FSF1	YOR271C	Putative protein; predicted to be an alpha-isopropylmalate carrier; belongs to the sideroblastic-associated protein family; non-tagged protein is detected in purified mitochondria; likely to play a role in iron homeostasis	0.207843	0.069566	0.221748			X		0	0	0.936		X						0.936
FSH1	YHR049W	Putative serine hydrolase; localizes to both the nucleus and cytoplasm; sequence is similar to S. cerevisiae Fsh2p and Fsh3p and the human candidate tumor suppressor OVCA2	14.2562	2.8936	2.44725				X	0.0008	0	0								0.0008
FUM1	YPL262W	Fumarase; converts fumaric acid to L-malic acid in the TCA cycle; cytosolic and mitochondrial distribution determined by the N-terminal targeting sequence, protein conformation, and status of glyoxylate shunt; phosphorylated in mitochondria	18.6233	22.2351	0.473795	X				0.977	0.0003	0				X				0.977
FUN14	YAL008W	Mitochondrial protein of unknown function	0.363894	0.0948544	0.173031			X		0	0	0.9562	X							0.9562
FYV4	YHR059W	Protein of unknown function; required for survival upon exposure to K1 killer toxin	12.6064	9.24528	0	X				0.9385	0.0001	0				X				0.9385
FYV8	YGR196C	Protein of unknown function; required for survival upon exposure to K1 killer toxin	20.569	--	##	X				#N/A	#N/A	#N/A				X				#N/A
FZO1	YBR179C	Mitofusin; integral membrane protein involved in mitochondrial outer membrane tethering and fusion; role in mitochondrial genome maintenance; efficient tethering and degradation of Fzo1p requires an intact N-terminal GTPase domain; targeted for destruction by the ubiquitin ligase SCF-Mdm30p and the cytosolic ubiquitin-proteasome system	0.378509	0.293054	0.136327			X		0	0	0.9684	X							0.9684
GAS1	YMR307W	Beta-1,3-glucanosyltransferase; required for cell wall assembly and also has a role in transcriptional silencing; localizes to cell surface via a glycosylphosphatidylinositol (GPI) anchor; also found at nuclear periphery; genetic interactions with histone H3 lysine acetyltransferases GCN5 and SAS3 indicate previously unsuspected functions for Gas1 in DNA damage response and cell cycle regulation	0.468509	0.1245	0.717757			X		0	0	0.9448		X						0.9448
GAS3	YMR215W	Putative 1,3-beta-glucanosyltransferase; has similarity go other GAS family members; low abundance, possibly inactive member of the GAS family of GPI-containing proteins; localizes to the cell wall; mRNA induced during sporulation	0.622296	0.666604	0.180324			X		0	0	0.8936		X						0.8936
GAS5	YOL030W	1,3-beta-glucanosyltransferase; has similarity to Gas1p; localizes to the cell wall	0.810468	0.642561	0.627213			X		0	0	0.7538		X						0.7538
GCV1	YDR019C	T subunit of the mitochondrial glycine decarboxylase complex; glycine decarboxylase is required for the catabolism of glycine to 5,10-methylene-THF; expression is regulated by levels of levels of 5,10-methylene-THF in the cytoplasm	26.7101	26.2655	0.506239	X				0.941	0.0002	0				X				0.941
GCV2	YMR189W	P subunit of the mitochondrial glycine decarboxylase complex; glycine decarboxylase is required for the catabolism of glycine to 5,10-methylene-THF; expression is regulated by levels of 5,10-methylene-THF in the cytoplasm	14.8896	10.5902	0.454168	X				0.957	0.0001	0				X				0.957
GCV3	YAL044C	H subunit of the mitochondrial glycine decarboxylase complex; glycine decarboxylase is required for the catabolism of glycine to 5,10-methylene-THF; also required for all protein lipoylation; expression is regulated by levels of 5,10-methylene-THF	19.8733	25.2946	0.289019	X				0.9693	0.0005	0				X				0.9693
GDH2	YDL215C	NAD(+)-dependent glutamate dehydrogenase; degrades glutamate to ammonia and alpha-ketoglutarate; expression sensitive to nitrogen catabolite repression and intracellular ammonia levels; genetically interacts with GDH3 by suppressing stress-induced apoptosis	0.570158	4.84038	84.1874		X			0	0.8649	0.0554		X						0.8649
GDI1	YER136W	GDP dissociation inhibitor; regulates vesicle traffic in secretory pathways by regulating the dissociation of GDP from the Sec4/Ypt/rab family of GTP binding proteins	2.67186	2.6194	29.7534				X	0.0001	0.003	0.0001								0.003
GEM1	YAL048C	Outer mitochondrial membrane GTPase, subunit of the ERMES complex; potential regulatory subunit of the ERMES complex that links the ER to mitochondria and may promote inter-organellar calcium and phospholipid exchange as well as coordinating mitochondrial DNA replication and growth; cells lacking Gem1p contain collapsed, globular, or grape-like mitochondria; ortholog of metazoan Miro GTPases	0.280301	3.06766	0.187694			X		0	0.5123	0.3318	X							0.5123
GEP3	YOR205C	Protein required for mitochondrial ribosome small subunit biogenesis; null mutant is defective in respiration and in maturation of 15S rRNA; protein is localized to the mitochondrial inner membrane; null mutant interacts synthetically with prohibitin (Phb1p)	0.586598	6.05747	0		X			0	0.9312	0.0195		X						0.9312
GEP4	YHR100C	Mitochondrial phosphatidylglycerophosphatase (PGP phosphatase); dephosphorylates phosphatidylglycerolphosphate to generate phosphatidylglycerol, an essential step during cardiolipin biosynthesis; null mutant is sensitive to tunicamycin, DTT	0.698614	10.4521	0		X			0	0.9717	0.0017		X						0.9717
GEP5	YLR091W	Protein of unknown function; required for mitochondrial genome maintenance; detected in highly purified mitochondria in high-throughput studies; null mutant has decreased levels of cardiolipin and phosphatidylethanolamine	0.598441	6.9626	0		X			0	0.9505	0.0106		X						0.9505
GEP7	YGL057C	Protein of unknown function; null mutant exhibits a respiratory growth defect and synthetic interactions with prohibitin (phb1) and gem1; authentic, non-tagged protein is detected in highly purified mitochondria in high-throughput studies	0.229558	0.137391	0			X		0	0	0.9615		X						0.9615
GGC1	YDL198C	Mitochondrial GTP/GDP transporter; essential for mitochondrial genome maintenance; has a role in mitochondrial iron transport; member of the mitochondrial carrier family	0.213746	0.135896	0.310369			X		0	0	0.9569		X						0.9569
GLC7	YER133W	Type 1 serine/threonine protein phosphatase catalytic subunit; cleavage and polyadenylation factor (CPF) component; involved in various processes including glycogen metabolism, sporulation, mitosis; accumulates at mating projections by interaction with Afr1p; interacts with many regulatory subunits; involved in regulation of the nucleocytoplasmic shuttling of Hxk2p; import into nucleus is inhibit…	1.33464	1.0235	55.9004				X	0	0	0.1169								0.1169
GLE1	YDL207W	Cytoplasmic nucleoporin required for polyadenylated mRNA export; contains a nuclear export signal; when bound to inositol hexakisphosphate (IP6), functions as an activator for the Dbp5p ATPase activity at the nuclear pore complex during mRNA export; mediates translation initiation; required for efficient translation termination	0.45528	10.101	0.43713		X			0	0.9598	0.0051		X						0.9598
GLK1	YCL040W	Glucokinase; catalyzes the phosphorylation of glucose at C6 in the first irreversible step of glucose metabolism; one of three glucose phosphorylating enzymes; expression regulated by non-fermentable carbon sources; GLK1 has a paralog, EMI2, that arose from the whole genome duplication	0.48348	2.92791	58.3205				X	0	0.3552	0.4605								0.4605
GLO4	YOR040W	Mitochondrial glyoxalase II; catalyzes the hydrolysis of S-D-lactoylglutathione into glutathione and D-lactate; GLO4 has a paralog, GLO2, that arose from the whole genome duplication	5.83897	4.74644	1.03818				X	0.1575	0.0029	0								0.1575
GLR1	YPL091W	Cytosolic and mitochondrial glutathione oxidoreductase; converts oxidized glutathione to reduced glutathione; cytosolic Glr1p is the main determinant of the glutathione redox state of the mitochondrial intermembrane space; mitochondrial Glr1p has a role in resistance to hyperoxia; protein abundance increases in response to DNA replication stress	13.0759	9.44514	0.897597	X				0.942	0.0001	0				X				0.942
GND1	YHR183W	6-phosphogluconate dehydrogenase (decarboxylating); catalyzes an NADPH regenerating reaction in the pentose phosphate pathway; required for growth on D-glucono-delta-lactone and adaptation to oxidative stress; GND1 has a paralog, GND2, that arose from the whole genome duplication	2.3494	3.26094	13.178				X	0.0006	0.0303	0.0004								0.0303
GOR1	YNL274C	Glyoxylate reductase; null mutation results in increased biomass after diauxic shift; the authentic, non-tagged protein is detected in highly purified mitochondria in high-throughput studies; protein abundance increases in response to DNA replication stress	11.1686	0.494413	253.317				X	0	0	0								0
GPA1	YHR005C	Subunit of the G protein involved in pheromone response; GTP-binding alpha subunit of the heterotrimeric G protein; negatively regulates the mating pathway by sequestering G(beta)gamma and by triggering an adaptive response; activates Vps34p at the endosome; protein abundance increases in response to DNA replication stress	0.238559	1.09274	0.429342			X		0	0.0016	0.9012		X						0.9012
GPA2	YER020W	Nucleotide binding alpha subunit of the heterotrimeric G protein; interacts with the receptor Gpr1p, has signaling role in response to nutrients; required for the recruitment of Ras-GTP at the plasma membrane and in the nucleus	0.282158	0.711965	7.55044			X		0	0	0.9507		X						0.9507
GPD2	YOL059W	NAD-dependent glycerol 3-phosphate dehydrogenase; expression is controlled by an oxygen-independent signaling pathway required to regulate metabolism under anoxic conditions; located in cytosol and mitochondria; constitutively active but is inactivated via phosphorylation by energy-stress responsive kinase SNF1; GPD2 has a paralog, GPD1, that arose from the whole genome duplication	0.378715	6.58133	1.28296		X			0	0.9309	0.0222		X						0.9309
GPM1	YKL152C	Tetrameric phosphoglycerate mutase; mediates the conversion of 3-phosphoglycerate to 2-phosphoglycerate during glycolysis and the reverse reaction during gluconeogenesis	9.29065	15.2139	33.3446	X				0.9828	0.0024	0			X					0.9828
GPT2	YKR067W	Glycerol-3-phosphate/dihydroxyacetone phosphate sn-1 acyltransferase; located in lipid particles and the ER; involved in the stepwise acylation of glycerol-3-phosphate and dihydroxyacetone in lipid biosynthesis; the most conserved motifs and functionally relevant residues are oriented towards the ER lumen	0.404045	0.205465	3.0054			X		0	0	0.9655	X							0.9655
GPX2	YBR244W	Phospholipid hydroperoxide glutathione peroxidase; protects cells from phospholipid hydroperoxides and nonphospholipid peroxides during oxidative stress; induced by glucose starvation; protein abundance increases in response to DNA replication stress	4.03388	4.677	0				X	0.0821	0.0228	0								0.0821
GRE1	YPL223C	Hydrophilin essential in desiccation-rehydration process; stress induced (osmotic, ionic, oxidative, heat shock and heavy metals); regulated by the HOG pathway; GRE1 has a paralog, SIP18, that arose from the whole genome duplication	7.67812	7.78932	##	X				0.876	0.0022	0				X				0.876
GRE3	YHR104W	Aldose reductase; involved in methylglyoxal, d-xylose, arabinose, and galactose metabolism; stress induced (osmotic, ionic, oxidative, heat shock, starvation and heavy metals); regulated by the HOG pathway; protein abundance increases in response to DNA replication stress	10.0409	3.5176	5.69823				X	0.0113	0	0								0.0113
GRS1	YBR121C	Cytoplasmic and mitochondrial glycyl-tRNA synthase; ligates glycine to the cognate anticodon-bearing tRNA; transcription termination factor that may interact with the 3'-end of pre-mRNA to promote 3'-end formation; GRS1 has a paralog, GRS2, that arose from the whole genome duplication	0.980255	6.49754	5.38174		X			0.0001	0.9298	0.0039		X						0.9298
GRX2	YDR513W	Cytoplasmic glutaredoxin; thioltransferase, glutathione-dependent disulfide oxidoreductase involved in maintaining redox state of target proteins, also exhibits glutathione peroxidase activity, expression induced in response to stress; GRX2 has two in-frame start codons resulting in a shorter isoform that is retained in the cytosol and a longer form translocated to the mitochondrial matrix; GRX2 …	10.3947	13.8465	3.03687	X				0.9824	0.001	0				X				0.9824
GRX5	YPL059W	Glutathione-dependent oxidoreductase; hydroperoxide and superoxide-radical responsive; mitochondrial matrix protein involved in the synthesis/assembly of iron-sulfur centers; monothiol glutaredoxin subfamily member along with Grx3p and Grx4p	9.5936	20.3403	0.286396	X				0.9809	0.005	0				X				0.9809
GSF2	YML048W	Endoplasmic reticulum (ER) localized integral membrane protein; may promote secretion of certain hexose transporters, including Gal2p; involved in glucose-dependent repression	0.335132	0.561491	6.99045			X		0	0	0.9619	X							0.9619
GTF1	YGR102C	Subunit of the trimeric GatFAB AmidoTransferase(AdT) complex; involved in the formation of Q-tRNAQ; transposon insertion mutant is salt sensitive and null mutant has growth defects; non-tagged protein is detected in purified mitochondria	3.58196	2.46485	0				X	0.0001	0.0003	0								0.0003
GTT1	YIR038C	ER associated glutathione S-transferase capable of homodimerization; expression induced during the diauxic shift and throughout stationary phase; functional overlap with Gtt2p, Grx1p, and Grx2p	0.907987	11.1081	11.7962		X			0.0002	0.9732	0.0006	X							0.9732
GUF1	YLR289W	Mitochondrial matrix GTPase; associates with mitochondrial ribosomes; important for translation under temperature and nutrient stress; may have a role in translational fidelity; similar to bacterial LepA elongation factor	0.259302	4.86553	0		X			0	0.855	0.0568		X						0.855
GUK1	YDR454C	Guanylate kinase; converts GMP to GDP; required for growth and mannose outer chain elongation of cell wall N-linked glycoproteins	5.74412	3.81	7.12279				X	0.0238	0.0007	0								0.0238
GUT1	YHL032C	Glycerol kinase; converts glycerol to glycerol-3-phosphate; glucose repression of expression is mediated by Adr1p and Ino2p-Ino4p; derepression of expression on non-fermentable carbon sources is mediated by Opi1p and Rsf1p	1.73585	3.22566	3.78846				X	0.0002	0.0977	0.0051								0.0977
GUT2	YIL155C	Mitochondrial glycerol-3-phosphate dehydrogenase; expression is repressed by both glucose and cAMP and derepressed by non-fermentable carbon sources in a Snf1p, Rsf1p, Hap2/3/4/5 complex dependent manner	0.554145	18.0906	0.545834		X			0	0.9446	0.0011	X	X	X					0.9446
GVP36	YIL041W	BAR domain protein that localizes to early and late Golgi vesicles; required for adaptation to varying nutrient concentrations, fluid-phase endocytosis, polarization of the actin cytoskeleton, and vacuole biogenesis	2.35799	6.88254	25.8464				X	0.0769	0.6278	0								0.6278
HAL9	YOL089C	Putative transcription factor containing a zinc finger; overexpression increases salt tolerance through increased expression of the ENA1 (Na+/Li+ extrusion pump) gene while gene disruption decreases both salt tolerance and ENA1 expression; HAL9 has a paralog, TBS1, that arose from the whole genome duplication	15.0695	--	##	X				#N/A	#N/A	#N/A				X				#N/A
HBN1	YCL026C-B	Protein of unknown function; similar to bacterial nitroreductases; green fluorescent protein (GFP)-fusion protein localizes to the cytoplasm and nucleus; protein becomes insoluble upon intracellular iron depletion; protein abundance increases in response to DNA replication stress	10.0235	4.6591	0.503846				X	0.1536	0.0001	0								0.1536
HBT1	YDL223C	Shmoo tip protein, substrate of Hub1p ubiquitin-like protein; mutants are defective for mating projection formation, thereby implicating Hbt1p in polarized cell morphogenesis; HBT1 has a paralog, YNL195C, that arose from the whole genome duplication	2.27639	3.62523	##				X	0.0016	0.0694	0.0004								0.0694
HEM1	YDR232W	5-aminolevulinate synthase; catalyzes the first step in the heme biosynthetic pathway; an N-terminal signal sequence is required for localization to the mitochondrial matrix; expression is regulated by Hap2p-Hap3p	2.53854	10.6984	0.103495		X			0.1949	0.7132	0		X						0.7132
HEM14	YER014W	Protoporphyrinogen oxidase; a mitochondrial enzyme that catalyzes the seventh step in the heme biosynthetic pathway, converting protoporphyrinogen IX to protoporphyrin IX; inhibited by diphenyl ether-type herbicides	0.475582	4.89179	0.461416		X			0	0.8667	0.0628		X						0.8667
HEM15	YOR176W	Ferrochelatase; a mitochondrial inner membrane protein, catalyzes the insertion of ferrous iron into protoporphyrin IX, the eighth and final step in the heme biosynthetic pathway	1.33268	19.8905	0.48263		X			0.0031	0.9665	0		X						0.9665
HER1	YOR227W	Protein of unknown function; required for proliferation or remodeling of the ER that is caused by overexpression of Hmg2p; may interact with ribosomes, based on co-purification experiments; HER1 has a paralog, GIP3, that arose from the whole genome duplication	3.30678	12.7228	17.9952	X				0.5454	0.3872	0				X				0.5454
HER2	YMR293C	Subunit of the trimeric GatFAB AmidoTransferase(AdT) complex; involved in the formation of Q-tRNAQ; required for remodeling of ER caused by Hmg2p overexpression; similar to bacterial GatA glutamyl-tRNA amidotransferase	4.20391	9.23085	0	X				0.7805	0.1008	0				X				0.7805
HFA1	YMR207C	Mitochondrial acetyl-coenzyme A carboxylase; catalyzes production of malonyl-CoA in mitochondrial fatty acid biosynthesis; relocalizes from mitochondrion to cytoplasm upon DNA replication stress; genetic and comparative analysis suggests that translation begins at a non-canonical (Ile) start codon at -372 relative to the annotated start codon	1.33905	3.85409	1.51821				X	0.0001	0.4386	0.0155								0.4386
HFD1	YMR110C	Hexadecenal dehydrogenase; involved in the conversion of sphingosine 1-phosphate breakdown product hexadecenal to hexadecenoic acid; located in the mitochondrial outer membrane and also in lipid particles; has similarity to ALDH3A2, a human fatty aldehyde dehydrogenase (FALDH) mutated in Sjogren-Larsson syndrome, a neurocutaneous disorder	0.343507	5.114	1.37606		X			0	0.8765	0.0567	X							0.8765
HMF1	YER057C	Member of the p14.5 protein family; functionally complements Mmf1p function when targeted to mitochondria; heat shock inducible; high-dosage growth inhibitor; forms a homotrimer in vitro; HMF1 has a paralog, MMF1, that arose from the whole genome duplication	3.59573	0.805418	5.9984				X	0	0	0			X					0
HMI1	YOL095C	Mitochondrial inner membrane localized ATP-dependent DNA helicase; required for the maintenance of the mitochondrial genome; not required for mitochondrial transcription; has homology to E. coli helicase uvrD	0.268781	6.4555	0		X			0	0.9087	0.0228		X						0.9087
HNT1	YDL125C	Adenosine 5'-monophosphoramidase; interacts physically and genetically with Kin28p, a CDK and TFIIK subunit, and genetically with CAK1; member of the histidine triad (HIT) superfamily of nucleotide-binding proteins and similar to Hint; protein abundance increases in response to DNA replication stress	11.4539	9.5628	1.1328	X				0.9498	0.0003	0				X				0.9498
HNT2	YDR305C	Dinucleoside triphosphate hydrolase; has similarity to the tumor suppressor FHIT and belongs to the histidine triad (HIT) superfamily of nucleotide-binding proteins	2.49105	7.93268	0.329583				X	0.1383	0.6534	0								0.6534
HOM6	YJR139C	Homoserine dehydrogenase (L-homoserine:NADP oxidoreductase); dimeric enzyme that catalyzes the third step in the common pathway for methionine and threonine biosynthesis; enzyme has nucleotide-binding, dimerization and catalytic regions	4.31787	2.20468	8.61947				X	0	0	0								0
HSP10	YOR020C	Mitochondrial matrix co-chaperonin; inhibits the ATPase activity of Hsp60p, a mitochondrial chaperonin; involved in protein folding and sorting in the mitochondria; 10 kD heat shock protein with similarity to E. coli groES	18.2893	29.4277	0.889037	X				0.9605	0.0014	0				X				0.9605
HSP104	YLL026W	Disaggregase; heat shock protein that cooperates with Ydj1p (Hsp40) and Ssa1p (Hsp70) to refold and reactivate previously denatured, aggregated proteins; responsive to stresses including: heat, ethanol, and sodium arsenite; involved in [PSI+] propagation; protein becomes more abundant and forms cytoplasmic foci in response to DNA replication stress; potentiated Hsp104p variants decrease TDP-43 pr…	0.54514	1.89469	177.49			X		0	0.026	0.7853		X						0.7853
HSP12	YFL014W	Plasma membrane protein involved in maintaining membrane organization; involved in maintaining organization during stress conditions; induced by heat shock, oxidative stress, osmostress, stationary phase, glucose depletion, oleate and alcohol; protein abundance increased in response to DNA replication stress and dietary restriction; regulated by the HOG and Ras-Pka pathways; required for dietary …	2.66989	4.73241	450.629				X	0.0262	0.1611	0.0001								0.1611
HSP26	YBR072W	Small heat shock protein (sHSP) with chaperone activity; forms hollow, sphere-shaped oligomers that suppress unfolded proteins aggregation; long-lived protein that is preferentially retained in mother cells and forms cytoplasmic foci; oligomer activation requires heat-induced conformational change; also has mRNA binding activity	1.38768	2.98899	480.863				X	0	0.1319	0.028								0.1319
HSP60	YLR259C	Tetradecameric mitochondrial chaperonin; required for ATP-dependent folding of precursor polypeptides and complex assembly; prevents aggregation and mediates protein refolding after heat shock; role in mtDNA transmission; phosphorylated	4.85151	24.8143	0.486761	X				0.7381	0.2216	0				X				0.7381
HSP78	YDR258C	Oligomeric mitochondrial matrix chaperone; cooperates with Ssc1p in mitochondrial thermotolerance after heat shock; able to prevent the aggregation of misfolded proteins as well as resolubilize protein aggregates	2.23572	15.4496	0.84011		X			0.0892	0.8675	0		X						0.8675
HTD2	YHR067W	Mitochondrial 3-hydroxyacyl-thioester dehydratase; involved in fatty acid biosynthesis, required for respiratory growth and for normal mitochondrial morphology	7.74532	4.60495	0.276849				X	0.1467	0.0004	0								0.1467
HTS1	YPR033C	Cytoplasmic and mitochondrial histidine tRNA synthetase; efficient mitochondrial localization requires both a presequence and an amino-terminal sequence; mutations in human ortholog HARS2 are associated with Perrault syndrome	2.63686	10.7148	3.24874		X			0.2356	0.6692	0		X						0.6692
HXK1	YFR053C	Hexokinase isoenzyme 1; a cytosolic protein that catalyzes phosphorylation of glucose during glucose metabolism; expression is highest during growth on non-glucose carbon sources; glucose-induced repression involves hexokinase Hxk2p; HXK1 has a paralog, HXK2, that arose from the whole genome duplication	1.09091	3.7194	33.0056				X	0	0.523	0.0447								0.523
HXK2	YGL253W	Hexokinase isoenzyme 2; catalyzes phosphorylation of glucose in the cytosol; predominant hexokinase during growth on glucose; functions in the nucleus to repress expression of HXK1 and GLK1 and to induce expression of its own gene; antiapoptotic; phosphorylation/dephosphorylation at serine-14 by protein kinase Snf1p and protein phosphatase Glc7p-Reg1p regulates nucleocytoplasmic shuttling of Hxk2…	1.81207	3.73245	22.8678				X	0.0007	0.1879	0.0026								0.1879
HXT2	YMR011W	High-affinity glucose transporter of the major facilitator superfamily; expression is induced by low levels of glucose and repressed by high levels of glucose	0.45474	0.315752	0.0310903			X		0	0	0.9595		X						0.9595
HXT5	YHR096C	Hexose transporter with moderate affinity for glucose; induced in the presence of non-fermentable carbon sources, induced by a decrease in growth rate, contains an extended N-terminal domain relative to other HXTs; HXT5 has a paralog, HXT3, that arose from the whole genome duplication	--	0.0461305	2.37092			X		#N/A	#N/A	#N/A		X						#N/A
HYR1	YIR037W	Thiol peroxidase; functions as a hydroperoxide receptor to sense intracellular hydroperoxide levels and transduce a redox signal to the Yap1p transcription factor; HYR1 has a paralog, GPX1, that arose from the whole genome duplication	2.43957	8.43171	7.16551				X	0.1338	0.6989	0			X					0.6989
IBA57	YJR122W	Protein involved in incorporating iron-sulfur clusters into proteins; mitochondrial matrix protein; involved in the incorporation of iron-sulfur clusters into mitochondrial aconitase-type proteins; activates the radical-SAM family members Bio2p and Lip5p; interacts with Ccr4p in the two-hybrid system	1.92688	4.5527	0.471233				X	0.0042	0.3659	0.0009								0.3659
ICL1	YER065C	Isocitrate lyase; catalyzes the formation of succinate and glyoxylate from isocitrate, a key reaction of the glyoxylate cycle; expression of ICL1 is induced by growth on ethanol and repressed by growth on glucose	1.33194	2.6265	##				X	0	0.0682	0.0466								0.0682
ICL2	YPR006C	2-methylisocitrate lyase of the mitochondrial matrix; functions in the methylcitrate cycle to catalyze the conversion of 2-methylisocitrate to succinate and pyruvate; ICL2 transcription is repressed by glucose and induced by ethanol	11.7826	21.1002	0.401807	X				0.9834	0.0021	0				X				0.9834
ICP55	YER078C	Mitochondrial aminopeptidase; cleaves the N termini of at least 38 imported proteins after cleavage by the mitochondrial processing peptidase (MPP), thereby increasing their stability; member of the aminopeptidase P family	8.00783	9.24325	0.223922	X				0.9416	0.0021	0				X				0.9416
IDH1	YNL037C	Subunit of mitochondrial NAD(+)-dependent isocitrate dehydrogenase; complex catalyzes the oxidation of isocitrate to alpha-ketoglutarate in the TCA cycle	11.0081	21.2315	0.453716	X				0.9826	0.003	0				X				0.9826
IDH2	YOR136W	Subunit of mitochondrial NAD(+)-dependent isocitrate dehydrogenase; complex catalyzes the oxidation of isocitrate to alpha-ketoglutarate in the TCA cycle; phosphorylated	8.03066	20.9285	0.617967	X				0.9707	0.0131	0				X				0.9707
IDP1	YDL066W	Mitochondrial NADP-specific isocitrate dehydrogenase; catalyzes the oxidation of isocitrate to alpha-ketoglutarate; not required for mitochondrial respiration and may function to divert alpha-ketoglutarate to biosynthetic processes	14.9279	22.4697	0.423774	X				0.9815	0.0009	0				X				0.9815
IDP3	YNL009W	Peroxisomal NADP-dependent isocitrate dehydrogenase; catalyzes oxidation of isocitrate to alpha-ketoglutarate with the formation of NADP(H+), required for growth on unsaturated fatty acids; IDP3 has a paralog, IDP2, that arose from the whole genome duplication	2.08588	8.8309	1.05602		X			0.0549	0.8345	0		X						0.8345
IFM1	YOL023W	Mitochondrial translation initiation factor 2	1.43361	22.8015	0.133959		X			0.0041	0.9604	0		X						0.9604
ILV1	YER086W	Threonine deaminase, catalyzes first step in isoleucine biosynthesis; expression is under general amino acid control; ILV1 locus exhibits highly positioned nucleosomes whose organization is independent of known ILV1 regulation	1.53549	16.526	0.338197		X			0.0086	0.962	0		X						0.962
ILV2	YMR108W	Acetolactate synthase; catalyses the first common step in isoleucine and valine biosynthesis and is the target of several classes of inhibitors, localizes to the mitochondria; expression of the gene is under general amino acid control	1.01853	22.5952	0.389026		X			0.0005	0.9593	0.0001		X						0.9593
ILV3	YJR016C	Dihydroxyacid dehydratase; catalyzes third step in the common pathway leading to biosynthesis of branched-chain amino acids	10.046	25.1264	0.362118	X				0.972	0.0089	0				X				0.972
ILV5	YLR355C	Acetohydroxyacid reductoisomerase and mtDNA binding protein; involved in branched-chain amino acid biosynthesis and maintenance of wild-type mitochondrial DNA; found in mitochondrial nucleoids	16.4498	17.1185	0.582187	X				0.9819	0.0002	0				X				0.9819
ILV6	YCL009C	Regulatory subunit of acetolactate synthase; acetolactate synthase catalyzes the first step of branched-chain amino acid biosynthesis; enhances activity of the Ilv2p catalytic subunit, localizes to mitochondria	1.66568	15.4149	0.165457		X			0.0149	0.9532	0		X						0.9532
IMG1	YCR046C	Mitochondrial ribosomal protein of the large subunit; required for respiration and for maintenance of the mitochondrial genome	1.6974	10.0188	0.286978		X			0.0157	0.9284	0		X						0.9284
IMG2	YCR071C	Mitochondrial ribosomal protein of the large subunit; conserved in metazoa, with similarity to human mitochondrial ribosomal protein MRPL49	5.73149	12.9509	0	X				0.9465	0.0245	0				X				0.9465
IML2	YJL082W	Protein of unknown function; the authentic, non-tagged protein is detected in highly purified mitochondria in high-throughput studies; protein abundance increases in response to DNA replication stress; IML2 has a paralog, YKR018C, that arose from the whole genome duplication	0.224876	9.79913	0.837833		X			0	0.873	0.0075	X							0.873
IMO32	YGR031W	Conserved mitochondrial protein of unknown function; processed by both mitochondrial processing peptidase and mitochondrial octapeptidyl aminopeptidase; gene contains the nested antisense gene NAG1	3.88261	19.2149	0.160492	X				0.6372	0.3216	0				X				0.6372
IMP1	YMR150C	Catalytic subunit of mitochondrial inner membrane peptidase complex; required for maturation of mitochondrial proteins of the intermembrane space; complex contains two catalytic subunits (Imp1p and Imp2p that differ in substrate specificty) and Som1p	0.364782	0.377033	0			X		0	0	0.9676		X						0.9676
IMP2	YMR035W	Catalytic subunit of mitochondrial inner membrane peptidase complex; required for maturation of mitochondrial proteins of the intermembrane space; complex contains two catalytic subunits (Imp1p and Imp2p that differ in substrate specificity), and Som1p	0.30479	0.0945013	0			X		0	0	0.9608		X						0.9608
INA17	YPL099C	F1F0 ATPase synthase peripheral stalk assembly factor; subunit of the matrix-exposed inner mitochondrial membrane localized INA complex (Ina22p-Ina17p) involved in assembly of the F1F0 peripheral stalk; co-purifies with Ina22p and ATP synthase subunits; null mutant displays elevated frequency of mitochondrial genome loss and has a respiratory growth defect	1.02575	0.104204	0			X		0	0	0.3123		X						0.3123
INA22	YIR024C	F1F0 ATP synthase peripheral stalk assembly factor; subunit of the matrix-exposed inner mitochondrial membrane localized INA complex (Ina22p-Ina17p) involved in assembly of the F1F0 peripheral stalk; co-purifies with Aim43p, ATP synthase subunits, and cytochrome bc1 complex assembly factors; interacts with Arh1p, a mitochondrial oxidoreductase; deletion mutant has a respiratory growth defect	0.499941	0.12747	0.669797			X		0	0	0.9365		X						0.9365
INH1	YDL181W	Protein that inhibits ATP hydrolysis by the F1F0-ATP synthase; inhibitory function is enhanced by stabilizing proteins Stf1p and Stf2p; has a calmodulin-binding motif and binds calmodulin in vitro; INH1 has a paralog, STF1, that arose from the whole genome duplication	6.36498	20.4804	2.4851	X				0.9407	0.0388	0				X				0.9407
IPP1	YBR011C	Cytoplasmic inorganic pyrophosphatase (PPase); homodimer that catalyzes the rapid exchange of oxygens from Pi with water, highly expressed and essential for viability, active-site residues show identity to those from E. coli PPase	1.33318	1.32922	47.1847				X	0	0.0003	0.0995								0.0995
IRC3	YDR332W	Double-stranded DNA-dependent helicase of the DExH/D-box family; required for maintenance of the mitochondrial (mt) genome; null mutant accumulates double-stranded breaks in mt DNA; localizes to the mt matrix	0.268205	43.142	0				X	0	0.0269	0.0005								0.0269
ISA1	YLL027W	Protein required for maturation of mitochondrial [4Fe-4S] proteins; functions in a complex with Isa2p and possibly Iba57p; isa1 deletion causes loss of mitochondrial DNA and respiratory deficiency; depletion reduces growth on nonfermentable carbon sources; functional ortholog of bacterial A-type ISC proteins	2.36738	4.2336	0				X	0.007	0.1441	0.0002								0.1441
ISA2	YPR067W	Protein required for maturation of mitochondrial [4Fe-4S] proteins; functions in a complex with Isa1p and possibly Iba57p; localizes to the mitochondrial intermembrane space, overexpression of ISA2 suppresses grx5 mutations	8.5334	13.4266	0	X				0.979	0.0028	0				X				0.979
ISC1	YER019W	Inositol phosphosphingolipid phospholipase C; mitochondrial membrane localized; hydrolyzes complex sphingolipids to produce ceramide; activates genes required for non-fermentable carbon source metabolism during the diauxic shift; activated by phosphatidylserine, cardiolipin, and phosphatidylglycerol; mediates Na+ and Li+ halotolerance	0.275558	0.11761	0			X		0	0	0.9652		X						0.9652
ISD11	YER048W-A	Cysteine desulfurase (Nfs1p) activator; essential for the formation of the persulfide intermediate at the desulfurase active site during pyridoxal phosphate-dependent desulfuration of cysteine; required for mitochondrial iron-sulfur cluster biosynthesis; exclusive to eukaryotes, implicated as eukaryotic supplement to the bacterium-derived Fe-S cluster (ISC) assembly apparatus; involved in regulat…	5.51819	21.0119	0.902232	X				0.8906	0.0833	0				X				0.8906
ISM1	YPL040C	Mitochondrial isoleucyl-tRNA synthetase; null mutant is deficient in respiratory growth	3.69309	4.05224	0.0988748				X	0.0205	0.0146	0								0.0205
IST2	YBR086C	Cortical ER protein involved in ER-plasma membrane tethering; one of 6 proteins (Ist2p, Scs2p, Scs22p, Tcb1p, Tcb2p, Tcb3p) that connect ER to the plasma membrane (PM) and regulate PM phosphatidylinositol-4-phosphate (PI4P) levels by controlling access of Sac1p phosphatase to its substrate PI4P in the PM; localizes to the mother cell in small-budded cells and to the bud in medium- and large-budde…	0.522796	0.26327	6.94246			X		0	0	0.9454	X							0.9454
ISU1	YPL135W	Conserved protein of the mitochondrial matrix; performs a scaffolding function during assembly of iron-sulfur clusters, interacts physically and functionally with yeast frataxin (Yfh1p); isu1 isu2 double mutant is inviable; ISU1 has a paralog, ISU2, that arose from the whole genome duplication	6.57197	43.2786	0.692123	X				0.4956	0.354	0				X				0.4956
ISU2	YOR226C	Protein required for synthesis of iron-sulfur proteins; localized to the mitochondrial matrix; performs a scaffolding function in mitochondria during Fe/S cluster assembly; involved in Fe-S cluster assembly for both mitochondrial and cytosolic proteins; isu1 isu2 double mutant is inviable; protein abundance increases in response to DNA replication stress; evolutionarily conserved; ISU2 has a para…	5.45455	11.8988	0	X				0.9341	0.0288	0				X				0.9341
JAC1	YGL018C	Specialized J-protein that functions in Fe-S cluster biogenesis; functions with Hsp70 in Fe-S cluster biogenesis in mitochondria; involved in iron metabolism; contains a J domain typical to J-type chaperones; localizes to the mitochondrial matrix	8.0562	8.10682	0.135048	X				0.8991	0.0017	0				X				0.8991
JEN1	YKL217W	Monocarboxylate/proton symporter of the plasma membrane; transport activity is dependent on the pH gradient across the membrane; mediates high-affinity uptake of carbon sources lactate, pyuvate, and acetate, and also of the micronutrient selenite, whose structure mimics that of monocarboxylates; expression and localization are tightly regulated, with transcription repression, mRNA degradation, an…	0.133905	0.157004	0.65324			X		0	0	0.8452		X						0.8452
JID1	YPR061C	Probable Hsp40p co-chaperone; has a DnaJ-like domain and appears to be involved in ER-associated degradation of misfolded proteins containing a tightly folded cytoplasmic domain; inhibits replication of Brome mosaic virus in S. cerevisiae	1.48958	2.82896	0.461416				X	0	0.0753	0.0198								0.0753
KAR2	YJL034W	ATPase involved in protein import into the ER; also acts as a chaperone to mediate protein folding in the ER and may play a role in ER export of soluble proteins; regulates the unfolded protein response via interaction with Ire1p	2.00891	5.62881	7.79464				X	0.0154	0.587	0.0003								0.587
KGD1	YIL125W	Subunit of the mitochondrial alpha-ketoglutarate dehydrogenase complex; catalyzes a key step in the tricarboxylic acid (TCA) cycle, the oxidative decarboxylation of alpha-ketoglutarate to form succinyl-CoA	5.72521	22.8103	0.475882	X				0.885	0.0874	0				X				0.885
KGD2	YDR148C	Dihydrolipoyl transsuccinylase; component of the mitochondrial alpha-ketoglutarate dehydrogenase complex, which catalyzes the oxidative decarboxylation of alpha-ketoglutarate to succinyl-CoA in the TCA cycle; phosphorylated	3.03473	9.96831	0.388982	X				0.4146	0.4614	0				X				0.4614
LAP2	YNL045W	Leucyl aminopeptidase yscIV with epoxide hydrolase activity; metalloenzyme containing one zinc atom; green fluorescent protein (GFP)-fusion protein localizes to the cytoplasm and nucleus; also known as leukotriene A4 hydrolase	5.80473	9.56665	2.35423	X				0.9193	0.0155	0				X				0.9193
LAP3	YNL239W	Cysteine aminopeptidase with homocysteine-thiolactonase activity; protects cells against homocysteine toxicity; has bleomycin hydrolase activity in vitro; transcription is regulated by galactose via Gal4p; orthologous to human BLMH	10.7529	12.4623	2.90867	X				0.9786	0.0007	0				X				0.9786
LAT1	YNL071W	Dihydrolipoamide acetyltransferase component (E2) of the PDC; the pyruvate dehydrogenase complex (PDC) catalyzes the oxidative decarboxylation of pyruvate to acetyl-CoA	1.37091	27.6037	0.579076		X			0.0023	0.9482	0		X						0.9482
LEM3	YNL323W	Membrane protein of the plasma membrane and ER; interacts specifically in vivo with the phospholipid translocase (flippase) Dnf1p; involved in translocation of phospholipids and alkylphosphocholine drugs across the plasma membrane; null mutant requires tryptophan due to mislocalization of tryptophan permease Tat2p	0.874308	0.210684	1.65297			X		0	0	0.6721		X						0.6721
LEU4	YNL104C	Alpha-isopropylmalate synthase (2-isopropylmalate synthase); the main isozyme responsible for the first step in the leucine biosynthesis pathway; LEU4 has a paralog, LEU9, that arose from the whole genome duplication	4.25659	23.2955	1.00134	X				0.6414	0.3157	0				X				0.6414
LEU5	YHR002W	Mitochondrial carrier protein; involved in the accumulation of CoA in the mitochondrial matrix; homolog of human Graves disease protein; does not encode an isozyme of Leu4p, as first hypothesized	0.247837	0.663724	0.125841			X		0	0	0.9456		X						0.9456
LEU9	YOR108W	Alpha-isopropylmalate synthase II (2-isopropylmalate synthase); catalyzes the first step in the leucine biosynthesis pathway; the minor isozyme, responsible for the residual alpha-IPMS activity detected in a leu4 null mutant; LEU9 has a paralog, LEU4, that arose from the whole genome duplication	4.49651	14.7333	0.95083	X				0.8516	0.1123	0				X				0.8516
LHS1	YKL073W	Molecular chaperone of the endoplasmic reticulum lumen; involved in polypeptide translocation and folding; nucleotide exchange factor for the ER lumenal Hsp70 chaperone Kar2p; regulated by the unfolded protein response pathway	1.56086	2.7326	##				X	0	0.0506	0.0152								0.0506
LIP2	YLR239C	Lipoyl ligase; involved in the modification of mitochondrial enzymes by the attachment of lipoic acid groups	2.44434	9.30743	0.111633		X			0.1489	0.7253	0		X						0.7253
LIP5	YOR196C	Protein involved in biosynthesis of the coenzyme lipoic acid; has similarity to E. coli lipoic acid synthase	1.80804	11.8467	0.152744		X			0.0261	0.9283	0		X						0.9283
LPD1	YFL018C	Dihydrolipoamide dehydrogenase; the lipoamide dehydrogenase component (E3) of the pyruvate dehydrogenase and 2-oxoglutarate dehydrogenase multi-enzyme complexes; PDH complex is concentrated in spots within the mitochondrial matrix, often near the ERMES complex and near peroxisomes; LPD1 has a paralog, IRC15, that arose from the whole genome duplication	13.5408	26.3568	0.537771	X				0.9753	0.0029	0				X				0.9753
LSC1	YOR142W	Alpha subunit of succinyl-CoA ligase; succinyl-CoA ligase is a mitochondrial enzyme of the TCA cycle that catalyzes the nucleotide-dependent conversion of succinyl-CoA to succinate; phosphorylated	11.0068	29.1275	0.620578	X				0.9614	0.0112	0				X				0.9614
LSC2	YGR244C	Beta subunit of succinyl-CoA ligase; succinyl-CoA ligase is a mitochondrial enzyme of the TCA cycle that catalyzes the nucleotide-dependent conversion of succinyl-CoA to succinate	14.9994	22.582	0.59186	X				0.9813	0.0009	0				X				0.9813
LSP1	YPL004C	Eisosome core component; eisosomes are large immobile patch structures at the cell cortex associated with endocytosis; phosphorylated on Thr233 upon Pkc1p hyperactivation in a Slt2p MAPK-dependent fashion; null mutants show activation of Pkc1p/Ypk1p stress resistance pathways; member of the BAR domain family	0.371783	20.1855	5.77904		X			0	0.8329	0.0026	X							0.8329
LYS12	YIL094C	Homo-isocitrate dehydrogenase; an NAD-linked mitochondrial enzyme required for the fourth step in the biosynthesis of lysine, in which homo-isocitrate is oxidatively decarboxylated to alpha-ketoadipate	2.75021	24.6201	0.357106	X				0.1348	0.8162	0				X				0.8162
LYS4	YDR234W	Homoaconitase; catalyzes the conversion of homocitrate to homoisocitrate, which is a step in the lysine biosynthesis pathway	8.14842	11.1398	0.384513	X				0.9684	0.0025	0				X				0.9684
MAE1	YKL029C	Mitochondrial malic enzyme; catalyzes the oxidative decarboxylation of malate to pyruvate, which is a key intermediate in sugar metabolism and a precursor for synthesis of several amino acids	2.20983	14.4841	0.246938		X			0.0869	0.8675	0		X						0.8675
MAM33	YIL070C	Acidic protein of the mitochondrial matrix; involved in oxidative phosphorylation; related to the human complement receptor gC1q-R	10.9439	20.2764	0.173031	X				0.9836	0.0026	0				X				0.9836
MAS1	YLR163C	Beta subunit of the mitochondrial processing protease (MPP); essential processing enzyme that cleaves the N-terminal targeting sequences from mitochondrially imported proteins	4.14881	11.7327	0.273807	X				0.8094	0.1303	0				X				0.8094
MAS2	YHR024C	Alpha subunit of the mitochondrial processing protease (MPP); essential processing enzyme that cleaves the N-terminal targeting sequences from mitochondrially imported proteins	3.3015	15.4101	0.32368	X				0.5041	0.4443	0				X				0.5041
MBA1	YBR185C	Membrane-associated mitochondrial ribosome receptor; forms a complex with Mdm38p that may facilitate recruitment of mRNA-specific translational activators to ribosomes; possible role in protein export from the matrix to inner membrane	0.242611	1.51379	0			X		0	0.0187	0.8407		X						0.8407
MBF1	YOR298C-A	Transcriptional coactivator; bridges the DNA-binding region of Gcn4p and TATA-binding protein Spt15p; suppressor of frameshift mutations; protein abundance increases in response to DNA replication stress	6.98586	8.67943	39.2203	X				0.9163	0.0045	0				X				0.9163
MCP1	YOR228C	Mitochondrial protein of unknown function involved in lipid homeostasis; integral membrane protein that localizes to the mitochondrial outer membrane; involved in mitochondrial morphology; interacts genetically with MDM10, and other members of the ERMES complex; contains five predicted transmembrane domains	0.261594	0.139487	0			X		0	0	0.9665	X							0.9665
MCP2	YLR253W	Mitochondrial protein of unknown function involved in lipid homeostasis; integral membrane protein that localizes to the mitochondrial inner membrane; involved in mitochondrial morphology; non-essential gene which interacts genetically with MDM10, and other members of the ERMES complex; transcription is periodic during the metabolic cycle; homologous to human aarF domain containing kinase, ADCK1	0.178753	0.246288	0			X		0	0	0.9362		X						0.9362
MCR1	YKL150W	Mitochondrial NADH-cytochrome b5 reductase; involved in ergosterol biosynthesis	2.65283	1.44401	0.649839				X	0	0	0.0003	X		X					0.0003
MCT1	YOR221C	Predicted malonyl-CoA:ACP transferase; putative component of a type-II mitochondrial fatty acid synthase that produces intermediates for phospholipid remodeling	1.85728	11.8102	0.222468		X			0.031	0.9213	0		X						0.9213
MCX1	YBR227C	Mitochondrial matrix protein; putative ATP-binding chaperone with non-proteolytic function; similar to bacterial ClpX proteins	0.443554	10.6898	0.265068		X			0	0.9583	0.0046		X						0.9583
MDG1	YNL173C	Plasma membrane protein; involved in G-protein mediated pheromone signaling pathway; overproduction suppresses bem1 mutations; MDG1 has a paralog, CRP1, that arose from the whole genome duplication	2.46475	12.636	52.7447		X			0.1674	0.7698	0		X						0.7698
MDH1	YKL085W	Mitochondrial malate dehydrogenase; catalyzes interconversion of malate and oxaloacetate; involved in the tricarboxylic acid (TCA) cycle; phosphorylated	21.0082	24.1618	0.458307	X				0.9689	0.0003	0				X				0.9689
MDH2	YOL126C	Cytoplasmic malate dehydrogenase; one of three isozymes that catalyze interconversion of malate and oxaloacetate; involved in the glyoxylate cycle and gluconeogenesis during growth on two-carbon compounds; interacts with Pck1p and Fbp1	1.2688	1.27804	82.0473				X	0	0.0002	0.1377								0.1377
MDH3	YDL078C	Peroxisomal malate dehydrogenase; catalyzes interconversion of malate and oxaloacetate; involved in the glyoxylate cycle	8.42105	11.5393	3.75268	X				0.9719	0.0022	0				X				0.9719
MDJ1	YFL016C	Co-chaperone that stimulates HSP70 protein Ssc1p ATPase activity; involved in protein folding/refolding in the mitochodrial matrix; required for proteolysis of misfolded proteins; member of the HSP40 (DnaJ) family of chaperones	0.831775	19.8501	0.164059		X			0.0001	0.9618	0.0002		X						0.9618
MDJ2	YNL328C	Constituent of the mitochondrial import motor; associated with the presequence translocase; function overlaps with that of Pam18p; stimulates the ATPase activity of Ssc1p to drive mitochondrial import; contains a J domain	0.503028	0.53662	0.230708			X		0	0	0.9433		X						0.9433
MDL1	YLR188W	Mitochondrial inner membrane half-type ABC transporter; mediates export of peptides generated upon proteolysis of mitochondrial proteins; plays a role in the regulation of cellular resistance to oxidative stress	0.243011	0.111238	0.0477326			X		0	0	0.9609		X						0.9609
MDL2	YPL270W	Mitochondrial inner membrane half-type ABC transporter; required for respiratory growth at high temperature; localizes to vacuole membrane in response to H2O2; similar to human TAP1 and TAP2 implicated in bare lymphocyte syndrome and Wegener-like granulomatosis	0.249044	0.141487	0.238663			X		0	0	0.9653		X						0.9653
MDM10	YAL010C	Subunit of both the ERMES and the SAM complex; component of ERMES complex which acts as a molecular tether between the mitochondria and the ER, necessary for efficient phospholipid exchange between organelles and for mitophagy; SAM/TOB complex component that functions in the assembly of outer membrane beta-barrel proteins; involved in mitochondrial inheritance and morphology; ERMES complex is oft…	0.340935	0.208893	0.173031			X		0	0	0.9705	X							0.9705
MDM31	YHR194W	Mitochondrial protein that may have a role in phospholipid metabolism; inner membrane protein with similarity to Mdm32p; required for normal mitochondrial morphology and inheritance; interacts genetically with MMM1, MMM2, MDM10, MDM12, and MDM34	0.05**	0.17087	0			X		#N/A	#N/A	#N/A		X						#N/A
MDM32	YOR147W	Mitochondrial inner membrane protein with similarity to Mdm31p; required for normal mitochondrial morphology and inheritance; interacts genetically with MMM1, MDM10, MDM12, and MDM34; variation between SK1 and S288C at residues 182 and 262 impacts invasive growth and mitochondrial network structure	0.965904	0.64754	0			X		0	0	0.5574		X						0.5574
MDM34	YGL219C	Mitochondrial component of the ERMES complex; links the ER to mitochondria and may promote inter-organellar calcium and phospholipid exchange as well as coordinating mitochondrial DNA replication and growth; required for mitophagy; ERMES complex is often co-localized with peroxisomes and with concentrated areas of pyruvate dehydrogenase	0.63085	2.226	0			X		0	0.0756	0.6435	X							0.6435
MDM35	YKL053C-A	Mitochondrial intermembrane space protein; mutation affects mitochondrial distribution and morphology; contains twin cysteine-x9-cysteine motifs; protein abundance increases in response to DNA replication stress	12.2271	12.6933	0.415274	X				0.9787	0.0004	0			X					0.9787
MDM38	YOL027C	Mitochondrial protein; forms a complex with Mba1p to facilitate recruitment of mRNA-specific translational activators to ribosomes; roles in protein export and K+/H+ exchange; human ortholog Letm1 implicated in Wolf-Hirschhorn syndrome	0.387743	0.973049	0.211263			X		0	0.0001	0.9377		X						0.9377
MDV1	YJL112W	Peripheral protein of cytosolic face of mitochondrial outer membrane; required for mitochondrial fission; interacts with Fis1p and with the dynamin-related GTPase Dnm1p; contains WD repeats; MDV1 has a paralog, CAF4, that arose from the whole genome duplication	2.35553	2.1426	0.761336				X	0	0.0011	0.0006	X							0.0011
MEF1	YLR069C	Mitochondrial elongation factor involved in translational elongation	4.27026	16.9922	0.280749	X				0.7843	0.1796	0				X				0.7843
MEF2	YJL102W	Mitochondrial elongation factor involved in translational elongation	1.47709	10.5899	0.2333		X			0.0063	0.9528	0.0001		X						0.9528
MET6	YER091C	Cobalamin-independent methionine synthase; involved in methionine biosynthesis and regeneration; requires a minimum of two glutamates on the methyltetrahydrofolate substrate, similar to bacterial metE homologs	2.41859	3.31216	##				X	0.0008	0.0295	0.0003								0.0295
MET7	YOR241W	Folylpolyglutamate synthetase; catalyzes extension of the glutamate chains of the folate coenzymes, required for methionine synthesis and for maintenance of mitochondrial DNA; protein abundance increases in response to DNA replication stress	0.890991	3.18605	0.93931				X	0	0.399	0.1616								0.399
MEU1	YLR017W	Methylthioadenosine phosphorylase (MTAP); catalyzes the initial step in the methionine salvage pathway; affects polyamine biosynthesis through regulation of ornithine decarboxylase (Spe1p) activity; regulates ADH2 gene expression	1.8493	6.467	1.07067				X	0.014	0.7668	0.0002								0.7668
MGE1	YOR232W	Mitochondrial matrix cochaperone; nucleotide release factor for Ssc1p in protein translocation and folding; also acts as cochaperone for Ssq1p in folding of Fe-S cluster proteins; acts as oxidative sensor to regulate mitochondrial Ssc1p; in presence of oxidative stress, dimeric Mge1p becomes a monomer and unable to regulate Ssc1p function; homolog of E. coli GrpE and human Mge1 (GRPEL1), which al…	16.1992	15.6326	0.636506	X				0.9809	0.0002	0				X				0.9809
MGM1	YOR211C	Mitochondrial GTPase, present in complex with Ugo1p and Fzo1p; required for mitochondrial morphology, fusion, and genome maintenance; exists as long and short form with different distributions; ratio of long to short forms is regulated by Psd1p; homolog of human OPA1 involved in autosomal dominant optic atrophy	0.453908	7.40917	0.178826		X			0	0.9492	0.0128		X	X					0.9492
MGM101	YJR144W	Protein with a role in mitochondrial DNA recombinational repair; also involved in interstrand cross-link repair; binds to and catalyzes the annealing of single-stranded mtDNA; oligomerizes to form rings and filaments; related to Rad52-type recombination proteins, with limited overall similarity but sharing conserved functionally important residues; component of the mitochondrial nucleoid, require…	7.24738	18.4485	0.646589	X				0.9687	0.015	0				X				0.9687
MGR1	YCL044C	Subunit of the mitochondrial (mt) i-AAA protease supercomplex; i-AAA degrades misfolded mitochondrial proteins; forms a subcomplex with Mgr3p that binds to substrates to facilitate proteolysis; required for growth of cells lacking mtDNA	0.185165	0.190046	0.300355			X		0	0	0.9439		X						0.9439
MGR2	YPL098C	Subunit of the TIM23 translocase complex; acts to couple Tim21p with the core Tim23 translocase; absolutely required for mitochondrial import of presequence-containing proteins at elevated temperature; required for viability of cells lacking the mitochondrial genome (petite-negative phenotype)	0.378902	0.260688	0			X		0	0	0.9686		X						0.9686
MGR3	YMR115W	Subunit of the mitochondrial (mt) i-AAA protease supercomplex; i-AAA degrades misfolded mitochondrial proteins; forms a subcomplex with Mgr1p that binds to substrates to facilitate proteolysis; required for growth of cells lacking mtDNA	0.295068	0.262516	0.25785			X		0	0	0.9708		X						0.9708
MHO1	YJR008W	Protein of unknown function; inhibits haploid invasive growth when overexpressed; synthetically lethal with phospholipase C (PLC1); expression induced by mild heat-stress on a non-fermentable carbon source, upon entry into stationary phase and upon nitrogen deprivation; repressed by inosine and choline in an Opi1p-dependent manner; highly conserved from bacteria to human; Memo, the human homolog,…	6.47284	11.728	1.96235	X				0.959	0.0105	0				X				0.959
MHR1	YDR296W	Protein involved in homologous recombination in mitochondria; required for recombination-dependent mtDNA partitioning; involved in stimulation of mitochondrial DNA replication in response to oxidative stress	0.651315	7.17781	0.0907703		X			0	0.9542	0.0079	X							0.9542
MIA40	YKL195W	Mitochondrial oxidoreductase; involved in mitochondrial intermembrane space import; component of MIA pathway which mediates import and oxidative folding of substrates including small proteins containing twin cysteine motifs; acts in concert with Erv1p, which oxidizes the cysteine residues of Mia40p to comprise a disulfide relay system that catalyzes import; also mediates folding of Atp23p via a c…	3.77979	2.71195	0.388107				X	0.0003	0.0006	0								0.0006
MIC10	YCL057C-A	Conserved component of the MICOS complex; MICOS (formerly MINOS or MitOS) is a mitochondrial inner membrane complex that extends into the intermembrane space and has a role in the maintenance of crista junctions, inner membrane architecture, and formation of contact sites to the outer membrane; ortholog of human MINOS1	0.267497	0.0686266	0.0804795			X		0	0	0.9492		X						0.9492
MIC12	YBR262C	Component of the MICOS complex; MICOS (formerly MINOS or MitOS) is a mitochondrial inner membrane complex that extends into the intermembrane space and has a role in the maintenance of crista junctions, inner membrane architecture, and formation of contact sites to the outer membrane	0.334058	0.53386	0.340389			X		0	0	0.9631		X						0.9631
MIC19	YFR011C	Component of the MICOS complex; MICOS (formerly MINOS or MitOS) is a mitochondrial inner membrane complex that extends into the intermembrane space and has a role in the maintenance of crista junctions, inner membrane architecture, and formation of contact sites to the outer membrane; Mic19p is peripheral to the inner membrane	2.60154	10.8219	0.583555		X			0.2211	0.6872	0		X						0.6872
MIC26	YGR235C	Component of the MICOS complex; MICOS (formerly MINOS or MitOS) is a mitochondrial inner membrane complex that extends into the intermembrane space and has a role in the maintenance of crista junctions, inner membrane architecture, and formation of contact sites to the outer membrane; Mic26p is a non-essential component of the complex	0.314963	0.931154	0.0769026			X		0	0.0002	0.9408		X						0.9408
MIC27	YNL100W	Component of the MICOS complex; MICOS (formerly MINOS or MitOS) is a mitochondrial inner membrane complex that extends into the intermembrane space and has a role in the maintenance of crista junctions, inner membrane architecture, and formation of contact sites to the outer membrane	0.292816	0.241209	0.191319			X		0	0	0.9709		X						0.9709
MIC60	YKR016W	Component of the MICOS complex; MICOS (formerly MINOS or MitOS) is a mitochondrial inner membrane complex that extends into the intermembrane space and has a role in the maintenance of crista junctions, inner membrane architecture, and formation of contact sites to the outer membrane; Mic60p is also involved in import of intermembrane space (IMS) proteins, probably by positioning Mia40p relative …	0.242362	2.07127	0.241315			X		0	0.1334	0.6739		X						0.6739
MIM1	YOL026C	Mitochondrial protein required for outer membrane protein import; cooperates with Tom70p to import the subset of proteins with multiple alpha-helical transmembrane segments, including Ugo1p, Tom20p, and others; present in a complex with Mim2p in the outer membrane that may create a local environment to facilitate membrane insertion of substrate proteins; also has a role in assembly of Tom20p into…	0.402125	0.074588	##			X		0	0	0.9385	X							0.9385
MIM2	YLR099W-A	Mitochondrial protein required for outer membrane protein import; involved in import of the subset of proteins with multiple alpha-helical transmembrane segments, including Ugo1p, Tom20p, and Fzo1p; component of a large protein complex in the outer membrane that includes Mim1p; not essential in W303 strain background	0.557986	0.25439	##			X		0	0	0.9349	X							0.9349
MIP1	YOR330C	Mitochondrial DNA polymerase gamma subunit; conserved C-terminal segment is required for the maintenance of mitochondrial genome; its human ortholog, POLG, can rescue mip1 phenotypes, and mutations in POLG are associated with Alpers-Huttenlocher syndrome (AHS) and other mitochondrial diseases; Mip1p is the single subunit of mitochondrial DNA polymerase in yeast, in contrast to metazoans in which …	0.63932	20.00*	0.269159		X			#N/A	#N/A	#N/A		X						#N/A
MIR1	YJR077C	Mitochondrial phosphate carrier; imports inorganic phosphate into mitochondria; functionally redundant with Pic2p but more abundant than Pic2p under normal conditions; phosphorylated	0.177213	0.48036	0.236615			X		0	0	0.9099		X						0.9099
MIS1	YBR084W	Mitochondrial C1-tetrahydrofolate synthase; involved in interconversion between different oxidation states of tetrahydrofolate (THF); provides activities of formyl-THF synthetase, methenyl-THF cyclohydrolase, and methylene-THF dehydrogenase	2.2633	20.017	0.310071		X			0.0721	0.8882	0		X						0.8882
MIX14	YDR031W	Mitochondrial intermembrane space protein of unknown function; required for normal oxygen consumption; contains twin cysteine-x9-cysteine motifs; protein abundance increases in response to DNA replication stress	7.46286	13.1442	0	X				0.9737	0.0057	0			X					0.9737
MIX17	YMR002W	Mitochondrial intermembrane space protein; required for normal oxygen consumption; contains twin cysteine-x9-cysteine motifs; protein abundance increases in response to DNA replication stress	44.6429	7.51823	0.162853	X				0.12	0	0			X					0.12
MIX23	YBL107C	Mitochondrial intermembrane space protein of unknown function; imported via the MIA import machinery; contains an unusual twin cysteine motif (CX13C CX14C)	6.49499	15.3096	0.519092	X				0.9637	0.0168	0			X					0.9637
MLC1	YGL106W	Essential light chain for Myo1p; light chain for Myo2p; stabilizes Myo2p by binding to the neck region; interacts with Myo1p, Iqg1p, and Myo2p to coordinate formation and contraction of the actomyosin ring with targeted membrane deposition	2.61632	2.91201	34.8626				X	0.0003	0.0079	0.0002								0.0079
MMF1	YIL051C	Mitochondrial protein required for transamination of isoleucine; but not of valine or leucine; may regulate specificity of branched-chain transaminases Bat1p and Bat2p; induction of expression in response to stress is mediated by a Hog1p-regulated antisense RNA and gene looping; interacts genetically with mitochondrial ribosomal protein genes; MMF1 has a paralog, HMF1, that arose from the whole g…	25.9802	22.8313	0.340738	X				0.9549	0.0001	0				X				0.9549
MMM1	YLL006W	ER integral membrane protein, ERMES complex subunit; ERMES links the ER to mitochondria and may promote inter-organellar calcium and phospholipid exchange as well as coordinating mitochondrial DNA replication and growth; required for mitophagy; ERMES complex is often co-localized with peroxisomes and with concentrated areas of pyruvate dehydrogenase	--	0.475722	0.475835			X		#N/A	#N/A	#N/A	X							#N/A
MMR1	YLR190W	Phosphorylated protein of the mitochondrial outer membrane; localizes only to mitochondria of the bud; interacts with Myo2p to mediate mitochondrial distribution to buds; mRNA is targeted to the bud via the transport system involving She2p	3.35146	2.39377	0.276849				X	0.0001	0.0004	0	X							0.0004
MMT1	YMR177W	Putative metal transporter involved in mitochondrial iron accumulation; MMT1 has a paralog, MMT2, that arose from the whole genome duplication	0.304181	0.032269	0.167787			X		0	0	0.8782		X						0.8782
MMT2	YPL224C	Putative metal transporter involved in mitochondrial iron accumulation; MMT2 has a paralog, MMT1, that arose from the whole genome duplication	0.235249	0.176368	0			X		0	0	0.9646		X						0.9646
MNE1	YOR350C	Protein involved in splicing Group I aI5-beta intron from COX1 mRNA; mitochondrial matrix protein	0.550116	4.62742	0		X			0	0.8425	0.0709		X						0.8425
MNP1	YGL068W	Protein associated with the mitochondrial nucleoid; putative mitochondrial ribosomal protein with similarity to E. coli L7/L12 ribosomal protein; required for normal respiratory growth	10.1061	20.5005	0.856047	X				0.982	0.004	0				X				0.982
MPC1	YGL080W	Highly conserved subunit of the mitochondrial pyruvate carrier; a mitochondrial inner membrane complex comprised of Mpc1p and either Mpc2p or Mpc3p mediates mitochondrial pyruvate uptake; null mutant displays slow growth that is complemented by expression of human or mouse ortholog; mutation in human ortholog is associated with lactic acidosis and hyperpyruvatemia	0.246493	0.523547	0.377522			X		0	0	0.9544		X						0.9544
MPC2	YHR162W	Highly conserved subunit of the mitochondrial pyruvate carrier; a mitochondrial inner membrane complex comprised of Mpc1p and either Mpc2p or Mpc3p mediates mitochondrial pyruvate uptake; more highly expressed in glucose-containing minimal medium than in lactate-containing medium; MPC2 has a paralog, FMP43, that arose from the whole genome duplication	--	0.11984	0			X		#N/A	#N/A	#N/A		X						#N/A
MPC3	YGR243W	Highly conserved subunit of mitochondrial pyruvate carrier; more highly expressed in glucose-containing minimal medium than in lactate-containing medium; expression regulated by osmotic and alkaline stresses; protein abundance increases in response to DNA replication stress; MPC3 has a paralog, MPC2, that arose from the whole genome duplication	0.345602	0.0836914	0			X		0	0	0.9541		X						0.9541
MPD2	YOL088C	Member of the protein disulfide isomerase (PDI) family; exhibits chaperone activity; overexpression suppresses the lethality of a pdi1 deletion but does not complement all Pdi1p functions; undergoes oxidation by Ero1p	0.959782	1.82391	3.15566				X	0	0.0117	0.3608								0.3608
MPM1	YJL066C	Mitochondrial intermembrane space protein of unknown function	7.70428	13.1103	0.403739	X				0.975	0.0047	0			X					0.975
MRF1	YGL143C	Mitochondrial translation release factor; involved in stop codon recognition and hydrolysis of the peptidyl-tRNA bond during mitochondrial translation; lack of MRF1 causes mitochondrial genome instability	7.36799	7.19334	0.263666	X				0.8159	0.0026	0				X				0.8159
MRH1	YDR033W	Protein that localizes primarily to the plasma membrane; also found at the nuclear envelope; long-lived protein that is asymmetrically retained in the plasma membrane of mother cells; the authentic, non-tagged protein is detected in mitochondria in a phosphorylated state; null mutation confers sensitivity to acetic acid	0.136797	0.166482	0.267621			X		0	0	0.8565		X						0.8565
MRH4	YGL064C	Mitochondrial ATP-dependent RNA helicase of the DEAD-box family; required for assembly of the large subunit of mitochondrial ribosomes; binds to the large subunit rRNA, 21S_rRNA; localizes to the matrix face of the mitochondrial inner membrane and associates with the large subunit precursor and with mature ribosomes	0.399912	11.8671	0		X			0	0.9485	0.0043		X						0.9485
MRM1	YOR201C	Ribose methyltransferase; modifies a functionally critical, conserved nucleotide in mitochondrial 21S rRNA	0.580417	1.8344	0			X		0	0.0195	0.7754		X						0.7754
MRM2	YGL136C	Mitochondrial 2' O-ribose methyltransferase; required for methylation of U(2791) in 21S rRNA; MRM2 deletion confers thermosensitive respiration and loss of mitochondrial DNA; has similarity to Spb1p and Trm7p, and to E. coli FtsJ/RrmJ	1.01727	8.25177	0		X			0.0003	0.9582	0.0012		X						0.9582
MRP1	YDR347W	Mitochondrial ribosomal protein of the small subunit; MRP1 exhibits genetic interactions with PET122, encoding a COX3-specific translational activator, and with PET123, encoding a small subunit mitochondrial ribosomal protein	1.55597	12.9412	0.406485		X			0.0098	0.9565	0		X						0.9565
MRP10	YDL045W-A	Mitochondrial ribosomal protein of the small subunit; contains twin cysteine-x9-cysteine motifs; oxidized by Mia40p during import into mitochondria	4.8628	9.81229	1.84566	X				0.8773	0.0457	0				X				0.8773
MRP13	YGR084C	Mitochondrial ribosomal protein of the small subunit	1.84894	25.5011	0.148312		X			0.0153	0.9428	0		X						0.9428
MRP17	YKL003C	Mitochondrial ribosomal protein of the small subunit; MRP17 exhibits genetic interactions with PET122, encoding a COX3-specific translational activator	0.977304	9.73759	0		X			0.0003	0.9688	0.0007		X						0.9688
MRP2	YPR166C	Mitochondrial ribosomal protein of the small subunit	0.874436	0.631084	0			X		0	0	0.6819		X						0.6819
MRP20	YDR405W	Mitochondrial ribosomal protein of the large subunit	1.89268	21.2405	0.382489		X			0.024	0.9403	0		X						0.9403
MRP21	YBL090W	Mitochondrial ribosomal protein of the small subunit; MRP21 exhibits genetic interactions with mutations in the COX2 and COX3 mRNA 5'-untranslated leader sequences	6.74879	3.82334	0.297876				X	0.0276	0.0002	0								0.0276
MRP4	YHL004W	Mitochondrial ribosomal protein of the small subunit	1.08035	22.1724	0.149379		X			0.0007	0.962	0.0001		X						0.962
MRP49	YKL167C	Mitochondrial ribosomal protein of the large subunit; not essential for mitochondrial translation	2.62873	6.48165	0.11074				X	0.1164	0.4652	0								0.4652
MRP51	YPL118W	Mitochondrial ribosomal protein of the small subunit; MRP51 exhibits genetic interactions with mutations in the COX2 and COX3 mRNA 5'-untranslated leader sequences	0.865386	4.00536	0.330332		X			0	0.7013	0.0651		X						0.7013
MRP7	YNL005C	Mitochondrial ribosomal protein of the large subunit	1.55352	10.638	0.204129		X			0.0089	0.9475	0.0001		X						0.9475
MRPL1	YDR116C	Mitochondrial ribosomal protein of the large subunit	1.65423	16.4578	0.234618		X			0.0138	0.9551	0		X						0.9551
MRPL10	YNL284C	Mitochondrial ribosomal protein of the large subunit; appears as two protein spots (YmL10 and YmL18) on two-dimensional SDS gels	1.46517	3.70203	0				X	0.0002	0.3201	0.011								0.3201
MRPL11	YDL202W	Mitochondrial ribosomal protein of the large subunit; localizes to vacuole in response to H2O2	0.696541	15.5396	0.114296		X			0	0.9679	0.0007		X						0.9679
MRPL13	YKR006C	Mitochondrial ribosomal protein of the large subunit; not essential for mitochondrial translation	4.49035	10.1169	0.230708	X				0.8464	0.0743	0				X				0.8464
MRPL15	YLR312W-A	Mitochondrial ribosomal protein of the large subunit	1.72418	12.0247	0.173031		X			0.0192	0.9391	0		X						0.9391
MRPL16	YBL038W	Mitochondrial ribosomal protein of the large subunit; homologous to bacterial L16 ribosomal protein; synthetic lethality with hac1 mutation suggests a possible role in synthesis of precursors for protein glycosylation	0.904598	11.9935	0		X			0.0002	0.9742	0.0005		X						0.9742
MRPL17	YNL252C	Mitochondrial ribosomal protein of the large subunit	1.57696	11.9113	0.334128		X			0.0105	0.9519	0		X						0.9519
MRPL19	YNL185C	Mitochondrial ribosomal protein of the large subunit	1.72206	14.4212	0.208249		X			0.0189	0.9468	0		X						0.9468
MRPL20	YKR085C	Mitochondrial ribosomal protein of the large subunit	3.52652	8.79484	0.250342	X				0.5864	0.2408	0				X				0.5864
MRPL22	YNL177C	Mitochondrial ribosomal protein of the large subunit	0.464782	5.63704	0.0814263		X			0	0.9114	0.0351		X						0.9114
MRPL23	YOR150W	Mitochondrial ribosomal protein of the large subunit; localizes to vacuole in response to H2O2	1.77288	0.798811	0				X	0	0	0.0159								0.0159
MRPL24	YMR193W	Mitochondrial ribosomal protein of the large subunit; two mitochondrial ribosomal proteins, YmL14 and YmL24, have been assigned to the same gene	0.869952	6.18186	0.0564999		X			0	0.928	0.0073		X						0.928
MRPL25	YGR076C	Mitochondrial ribosomal protein of the large subunit; mutation confers increased replicative lifespan	2.56796	8.49185	0.254993				X	0.1778	0.6457	0								0.6457
MRPL27	YBR282W	Mitochondrial ribosomal protein of the large subunit; homolog of human Bcl-2 interacting protein BMRP	1.84091	11.094	0.265068		X			0.0287	0.9189	0		X						0.9189
MRPL28	YDR462W	Mitochondrial ribosomal protein of the large subunit; protein abundance increases in response to DNA replication stress	1.49511	8.52406	0.140771		X			0.0054	0.93	0.0002		X						0.93
MRPL3	YMR024W	Mitochondrial ribosomal protein of the large subunit; located in close proximity to the polypeptide exit channel of the ribosome; mutations in human homolog MRPL44 cause childhood cardiomyopathy; human MRPL44 deficiency results in inefficient assembly of the mitochondrial ribosome, and in tissue-specific respiratory chain deficiency, manifesting as either Complex I+Complex IV or Complex IV defici…	1.77446	11.8949	0.174648		X			0.0231	0.9328	0		X						0.9328
MRPL31	YKL138C	Mitochondrial ribosomal protein of the large subunit	0.427074	0.46679	0.1582			X		0	0	0.9594		X						0.9594
MRPL32	YCR003W	Mitochondrial ribosomal protein of the large subunit; protein abundance increases in response to DNA replication stress	7.47774	23.18	0.162853	X				0.9539	0.0261	0				X				0.9539
MRPL33	YMR286W	Mitochondrial ribosomal protein of the large subunit	5.88603	8.14386	0.723583	X				0.8656	0.0122	0				X				0.8656
MRPL35	YDR322W	Mitochondrial ribosomal protein of the large subunit	0.693376	14.2202	0.487311		X			0	0.9703	0.0008		X						0.9703
MRPL36	YBR122C	Mitochondrial ribosomal protein of the large subunit; overproduction suppresses mutations in the COX2 leader peptide-encoding region	5.67805	19.0666	0.178612	X				0.9203	0.0567	0				X				0.9203
MRPL37	YBR268W	Mitochondrial ribosomal protein of the large subunit	13.1452	23.6664	0	X				0.9805	0.0021	0				X				0.9805
MRPL38	YKL170W	Mitochondrial ribosomal protein of the large subunit; appears as two protein spots (YmL34 and YmL38) on two-dimensional SDS gels; protein abundance increases in response to DNA replication stress	1.28487	9.65951	0.127777		X			0.0021	0.9579	0.0002		X						0.9579
MRPL39	YML009C	Mitochondrial ribosomal protein of the large subunit	4.23633	15.2815	0	X				0.8023	0.1591	0				X				0.8023
MRPL4	YLR439W	Mitochondrial ribosomal protein of the large subunit; homolog of prokaryotic L29 ribosomal protein; located at the ribosomal tunnel exit	2.53576	16.3918	0.333052		X			0.1666	0.7869	0		X						0.7869
MRPL40	YPL173W	Mitochondrial ribosomal protein of the large subunit	5.04242	16.8184	0.397684	X				0.8943	0.0784	0				X				0.8943
MRPL44	YMR225C	Mitochondrial ribosomal protein of the large subunit; protein abundance increases in response to DNA replication stress	5.03736	12.3793	0.284434	X				0.9136	0.0477	0				X				0.9136
MRPL49	YJL096W	Mitochondrial ribosomal protein of the large subunit	2.78313	7.9986	0				X	0.2431	0.5235	0								0.5235
MRPL50	YNR022C	Mitochondrial ribosomal protein of the large subunit; not essential for mitochondrial translation	10.8474	18.111	0.405145	X				0.9849	0.0018	0				X				0.9849
MRPL51	YPR100W	Mitochondrial ribosomal protein of the large subunit	2.06666	6.37264	0.173031				X	0.0281	0.682	0.0001								0.682
MRPL6	YHR147C	Mitochondrial ribosomal protein of the large subunit	0.998714	17.234	0.19775		X			0.0005	0.9715	0.0001		X						0.9715
MRPL7	YDR237W	Mitochondrial ribosomal protein of the large subunit; MRPL7 produces both YmL5 and YmL7, which are two different modified forms of the same protein	0.85897	11.2984	0		X			0.0001	0.9737	0.0007		X						0.9737
MRPL8	YJL063C	Mitochondrial ribosomal protein of the large subunit	1.07592	5.42348	0.167787		X			0.0001	0.8631	0.0071		X						0.8631
MRPL9	YGR220C	Mitochondrial ribosomal protein of the large subunit	2.13869	12.1602	0		X			0.0753	0.8687	0		X						0.8687
MRPS12	YNR036C	Mitochondrial protein; may interact with ribosomes based on co-purification experiments; similar to E. coli and human mitochondrial S12 ribosomal proteins	2.72655	6.94606	0.282499				X	0.1684	0.4751	0								0.4751
MRPS16	YPL013C	Mitochondrial ribosomal protein of the small subunit	1.7407	2.50065	0.0728551				X	0	0.0173	0.0076								0.0173
MRPS17	YMR188C	Mitochondrial ribosomal protein of the small subunit	1.60283	9.68301	0.274238		X			0.0102	0.9351	0.0001		X						0.9351
MRPS18	YNL306W	Mitochondrial ribosomal protein of the small subunit; essential for viability, unlike most other mitoribosomal proteins	1.21976	8.53714	0.0407131		X			0.0012	0.9514	0.0005		X						0.9514
MRPS28	YDR337W	Mitochondrial ribosomal protein of the small subunit	3.69261	11.0905	0.247514	X				0.6949	0.2232	0				X				0.6949
MRPS35	YGR165W	Mitochondrial ribosomal protein of the small subunit; null mutant does not grow on glycerol, is sensitive to 2,4-dichlorophenol, and accumulates large lipid droplets	1.25461	11.4633	0.533794		X			0.0021	0.9672	0.0001		X						0.9672
MRPS5	YBR251W	Mitochondrial ribosomal protein of the small subunit	0.905908	12.604	0.418158		X			0.0002	0.9745	0.0004		X						0.9745
MRPS8	YMR158W	Mitochondrial ribosomal protein of the small subunit	1.79363	12.5351	0.0512684		X			0.025	0.9334	0		X						0.9334
MRPS9	YBR146W	Mitochondrial ribosomal protein of the small subunit	1.66893	3.80845	0.228468				X	0.0005	0.2618	0.0044								0.2618
MRS1	YIR021W	Splicing protein; required for splicing of two mitochondrial group I introns (BI3 in COB and AI5beta in COX1); forms a splicing complex, containing four subunits of Mrs1p and two subunits of the BI3-encoded maturase, that binds to the BI3 RNA; MRS1 has a paralog, CCE1, that arose from the whole genome duplication	0.881323	11.7989	0.138425		X			0.0002	0.9741	0.0005		X						0.9741
MRS3	YJL133W	Iron transporter, mediates Fe2+ transport across inner mito membrane; mitochondrial carrier family member; active under low-iron conditions; may transport other cations; MRS3 has a paralog, MRS4, that arose from the whole genome duplication	0.2212	0.19881	0			X		0	0	0.9614		X						0.9614
MRS4	YKR052C	Iron transporter of the mitochondrial carrier family; mediates Fe2+ transport across the inner mitochondrial membrane; active under low-iron conditions; may transport other cations; protein abundance increases in response to DNA replication stress; MRS4 has a paralog, MRS3, that arose from the whole genome duplication	0.172451	0.169235	0			X		0	0	0.9322		X						0.9322
MSC1	YML128C	Protein of unknown function; mutant is defective in directing meiotic recombination events to homologous chromatids; the authentic, non-tagged protein is detected in highly purified mitochondria and is phosphorylated	1.22555	9.98128	58.2249		X			0.0016	0.9625	0.0002		X						0.9625
MSC3	YLR219W	Protein of unknown function; green fluorescent protein (GFP)-fusion protein localizes to the cell periphery; msc3 mutants are defective in directing meiotic recombination events to homologous chromatids; potential Cdc28p substrate; protein abundance increases in response to DNA replication stress	10.7272	2.71536	12.8481				X	0.0005	0	0								0.0005
MSC6	YOR354C	Protein of unknown function; mutant is defective in directing meiotic recombination events to homologous chromatids; the authentic, non-tagged protein is detected in highly purified mitochondria in high-throughput studies	1.77558	10.8334	0.14813		X			0.0224	0.9259	0		X						0.9259
MSC7	YHR039C	Protein of unknown function; green fluorescent protein (GFP)-fusion protein localizes to the endoplasmic reticulum; msc7 mutants are defective in directing meiotic recombination events to homologous chromatids	0.39246	0.22868	2.10378			X		0	0	0.9672	X							0.9672
MSD1	YPL104W	Mitochondrial aspartyl-tRNA synthetase; required for acylation of aspartyl-tRNA; yeast and bacterial aspartyl-, asparaginyl-, and lysyl-tRNA synthetases contain regions with high sequence similarity, suggesting a common ancestral gene	9.97219	8.07593	0.249618	X				0.8997	0.0005	0				X				0.8997
MSE1	YOL033W	Mitochondrial glutamyl-tRNA synthetase; predicted to be palmitoylated	0.998587	3.81318	0.0561181				X	0	0.5985	0.0545								0.5985
MSF1	YPR047W	Mitochondrial phenylalanyl-tRNA synthetase; active as a monomer, unlike the cytoplasmic subunit which is active as a dimer complexed to a beta subunit dimer; similar to the alpha subunit of E. coli phenylalanyl-tRNA synthetase	4.83035	6.58624	0.104471	X				0.5949	0.0316	0				X				0.5949
MSH1	YHR120W	DNA-binding protein of the mitochondria; involved in repair of mitochondrial DNA; has ATPase activity and binds to DNA mismatches; has homology to E. coli MutS; transcription is induced during meiosis	0.497401	5.94488	0		X			0	0.9246	0.0264		X						0.9246
MSK1	YNL073W	Mitochondrial lysine-tRNA synthetase; required for import of both aminoacylated and deacylated forms of tRNA(Lys) into mitochondria and for aminoacylation of mitochondrially encoded tRNA(Lys)	1.93035	4.4066	0.151009				X	0.0034	0.3241	0.001								0.3241
MSM1	YGR171C	Mitochondrial methionyl-tRNA synthetase (MetRS); functions as a monomer in mitochondrial protein synthesis; functions similarly to cytoplasmic MetRS although the cytoplasmic form contains a zinc-binding domain not found in Msm1p	2.01574	7.48744	0.230708		X			0.0347	0.7985	0.0001		X						0.7985
MSP1	YGR028W	Highly-conserved N-terminally anchored AAA-ATPase; distributed in the mitochondrial outer membrane and peroxisomes; involved in mitochondrial protein sorting; functions as an extraction engine in local organelle surveillance to remove and initiate degradation of mistargeted proteins, ensuring fidelity of organelle-specific localization of tail-anchored proteins; contains an N-terminal transmembra…	0.391923	1.67853	0.187694			X		0	0.0147	0.8699	X							0.8699
MSR1	YHR091C	Mitochondrial arginyl-tRNA synthetase; mutations in human ortholog are associated with pontocerebellar hypoplasia type 6; MSR1 has a paralog, YDR341C, that arose from the whole genome duplication	0.978177	2.43411	0.328465				X	0	0.0919	0.2391								0.2391
MSS1	YMR023C	Mitochondrial protein; forms a heterodimer complex with Mto1p that performs the 5-carboxymethylaminomethyl modification of the wobble uridine base in mitochondrial tRNAs; similar to human GTPBP3	0.537575	3.66901	0.109283		X			0	0.6504	0.2026		X						0.6504
MSS116	YDR194C	Mitochondrial transcription elongation factor; DEAD-box protein; required for efficient splicing of mitochondrial Group I and II introns; non-polar RNA helicase that also facilities strand annealing; promotes RNA folding by stabilizing an early assembly intermediate	0.768549	13.0165	0.164983		X			0.0001	0.9735	0.0007		X						0.9735
MSS18	YPR134W	Nuclear encoded protein needed for splicing of mitochondrial intron; required for efficient splicing of mitochondrial COX1 aI5beta intron; mss18 mutations block cleavage of 5' exon - intron junction; phenotype of intronless strain suggests additional functions	1.00316	6.23011	0		X			0.0001	0.9189	0.0045		X						0.9189
MSS2	YDL107W	Peripherally bound inner membrane protein of the mitochondrial matrix; involved in membrane insertion of C-terminus of Cox2p, interacts genetically and physically with Cox18p	0.164201	16.5757	0		X			0	0.352	0.0019		X						0.352
MSS51	YLR203C	Specific translational activator for the mitochondrial COX1 mRNA; loosely associated with the matrix face of the mitochondrial inner membrane; localizes to vacuole membrane in response to H2O2; influences both COX1 mRNA translation and Cox1p assembly into cytochrome c oxidase; binds to heme B, which may be a mechanism for sensing oxygen levels in order to regulate cytochrome c oxidase biogenesis	0.597503	20.9464	0.313837		X			0	0.9325	0.0008		X						0.9325
MST1	YKL194C	Mitochondrial threonyl-tRNA synthetase; aminoacylates both the canonical threonine tRNA tT(UGU)Q1 and the unusual threonine tRNA tT(UAG)Q2 in vitro; lacks a typical editing domain, but has pre-transfer editing activity stimulated by the unusual tRNA-Thr	4.86198	7.8418	0.0974822	X				0.781	0.038	0				X				0.781
MSW1	YDR268W	Mitochondrial tryptophanyl-tRNA synthetase	2.16219	5.03085	0.125841				X	0.0141	0.3885	0.0003								0.3885
MSY1	YPL097W	Mitochondrial tyrosyl-tRNA synthetase	1.80763	10.5427	0.164465		X			0.0248	0.9191	0		X						0.9191
MTC3	YGL226W	Protein of unknown function; green fluorescent protein (GFP)-fusion protein localizes to the mitochondrion; mtc3 is synthetically sick with cdc13-1	0.321239	1.37532	0			X		0	0.0045	0.9043		X						0.9043
MTF1	YMR228W	Mitochondrial RNA polymerase specificity factor; has structural similarity to S-adenosylmethionine-dependent methyltransferases and functional similarity to bacterial sigma-factors; Mtf1p interacts with and stabilizes the Rpo41p-promoter complex, enhancing DNA bending and melting to facilitate pre-initiation open complex formation	1.75048	11.4907	0.289726		X			0.0209	0.9334	0		X	X					0.9334
MTF2	YDL044C	Mitochondrial protein that interacts with mitochondrial RNA polymerase; interacts with an N-terminal region of mitochondrial RNA polymerase (Rpo41p) and couples RNA processing and translation to transcription	0.789086	4.39421	0.193497		X			0	0.7973	0.051		X						0.7973
MTG1	YMR097C	Putative GTPase peripheral to the mitochondrial inner membrane; essential for respiratory competence, likely functions in assembly of the large ribosomal subunit, has homologs in plants and animals	0.420938	5.01893	0.0814263		X			0	0.8743	0.0601		X						0.8743
MTG2	YHR168W	Putative GTPase; member of the Obg family; peripheral protein of the mitochondrial inner membrane that associates with the large ribosomal subunit; required for mitochondrial translation, possibly via a role in ribosome assembly	0.878216	5.04889	0.0954653		X			0	0.8641	0.0194		X						0.8641
MTM1	YGR257C	Mitochondrial protein of the mitochondrial carrier family; high affinity pyridoxal 5&#8242;-phosphate transporter; involved in mitochondrial iron homeostasis and in activating mitochondrial Sod2p by facilitating insertion of an essential manganese cofactor	0.724772	0.73064	0			X		0	0	0.8221		X						0.8221
MTO1	YGL236C	Mitochondrial protein; forms a heterodimer complex with Mss1p that performs the 5-carboxymethylaminomethyl modification of the wobble uridine base in mitochondrial tRNAs; required for respiration in paromomycin-resistant 15S rRNA mutants	1.15287	5.77573	0.135415		X			0.0003	0.8755	0.004		X						0.8755
MXR1	YER042W	Methionine-S-sulfoxide reductase; involved in the response to oxidative stress; protects iron-sulfur clusters from oxidative inactivation along with MXR2; involved in the regulation of lifespan; reduced activity of human homolog implicated in Alzheimer disease	9.99885	7.75502	22.2399	X				0.8782	0.0004	0				X				0.8782
MXR2	YCL033C	Methionine-R-sulfoxide reductase; involved in the response to oxidative stress; protects iron-sulfur clusters from oxidative inactivation along with MXR1; involved in the regulation of lifespan	7.08294	9.5153	0	X				0.9412	0.0046	0				X				0.9412
MYO3	YKL129C	One of two type I myosins; localizes to actin cortical patches; deletion of MYO3 has little effect on growth, but myo3 myo5 double deletion causes severe defects in growth and actin cytoskeleton organization; MYO3 has a paralog, MYO5, that arose from the whole genome duplication	0.727728	3.24987	4.13684				X	0	0.4721	0.2328								0.4721
MYO5	YMR109W	One of two type I myosin motors; contains proline-rich tail homology 2 (TH2) and SH3 domains; MYO5 deletion has little effect on growth, but myo3 myo5 double deletion causes severe defects in growth and actin cytoskeleton organization; MYO5 has a paralog, MYO3, that arose from the whole genome duplication	0.974545	2.5572	3.1737				X	0	0.1252	0.2216								0.2216
MZM1	YDR493W	Protein required for assembly of the cytochrome bc(1) complex; acts as a chaperone for Rip1p and facilitates its insertion into the complex at a late stage of assembly; localized to the mitochondrial matrix; null mutant exhibits a respiratory growth defect and reduced mitochondrial zinc levels, which is characteristic of mutations affecting bc(1) complex assembly; member of the LYR protein family…	7.71307	10.9654	0.128171	X				0.9652	0.0034	0				X				0.9652
NAM2	YLR382C	Mitochondrial leucyl-tRNA synthetase; also has a direct role in splicing of several mitochondrial group I introns; indirectly required for mitochondrial genome maintenance	1.98138	10.1748	0.267543		X			0.0444	0.885	0		X						0.885
NAM9	YNL137C	Mitochondrial ribosomal component of the small subunit	0.688109	1.71414	0.377522			X		0	0.0102	0.7091		X						0.7091
NAT2	YGR147C	Protein of unknown function; has an apparent role in acetylation of N-terminal methionine residues	0.256155	0.622874	0.313414			X		0	0	0.9508		X						0.9508
NCA2	YPR155C	Protein that regulates expression of Fo-F1 ATP synthase subunits; involved in the regulation of mitochondrial expression of subunits 6 (Atp6p) and 8 (Atp8p) of the Fo-F1 ATP synthase; functions with Nca3p	0.261253	0.156938	0.18706			X		0	0	0.9676	X							0.9676
NCE102	YPR149W	Protein of unknown function; contains transmembrane domains; involved in secretion of proteins that lack classical secretory signal sequences; component of the detergent-insoluble glycolipid-enriched complexes (DIGs); NCE102 has a paralog, FHN1, that arose from the whole genome duplication	0.118627	0.0327686	1.58781			X		0	0	0.5604		X						0.5604
NCE103	YNL036W	Carbonic anhydrase; metalloenzyme that catalyzes CO2 hydration to bicarbonate, which is an important metabolic substrate, and protons; not expressed under conditions of high CO2, such as inside a growing colony, but transcription is induced in response to low CO2 levels, such as on the colony surface in ambient air; poorly transcribed under aerobic conditions and at an undetectable level under an…	4.05593	4.8573	##				X	0.1094	0.0275	0			X					0.1094
NCP1	YHR042W	NADP-cytochrome P450 reductase; involved in ergosterol biosynthesis; associated and coordinately regulated with Erg11p	0.613664	0.558511	3.42766			X		0	0	0.9056	X							0.9056
NDE1	YMR145C	Mitochondrial external NADH dehydrogenase; type II NAD(P)H:quinone oxidoreductase that catalyzes the oxidation of cytosolic NADH; Nde1p and Nde2p provide cytosolic NADH to the mitochondrial respiratory chain; NDE1 has a paralog, NDE2, that arose from the whole genome duplication	0.223647	0.328708	0.46391			X		0	0	0.9583		X						0.9583
NDE2	YDL085W	Mitochondrial external NADH dehydrogenase; catalyzes the oxidation of cytosolic NADH; Nde1p and Nde2p are involved in providing the cytosolic NADH to the mitochondrial respiratory chain; NDE2 has a paralog, NDE1, that arose from the whole genome duplication	0.24986	0.510307	1.39683			X		0	0	0.9561		X						0.9561
NDI1	YML120C	NADH:ubiquinone oxidoreductase; transfers electrons from NADH to ubiquinone in the respiratory chain but does not pump protons, in contrast to the higher eukaryotic multisubunit respiratory complex I; phosphorylated; involved in Mn and H2O2 induced apoptosis; upon apoptotic stress, Ndip is activated in the mitochondria by N-terminal cleavage, and the truncated protein translocates to the cytoplas…	0.326287	1.13388	0.367093			X		0	0.0009	0.9271		X						0.9271
NFS1	YCL017C	Cysteine desulfurase; involved in iron-sulfur cluster (Fe/S) biogenesis and in thio-modification of mitochondrial and cytoplasmic tRNAs; essential protein located predominantly in mitochondria	2.00885	18.3689	0.464512		X			0.041	0.923	0		X						0.923
NFU1	YKL040C	Protein involved in iron metabolism in mitochondria; similar to NifU, which is a protein required for the maturation of the Fe/S clusters of nitrogenase in nitrogen-fixing bacteria	10.7668	18.2708	0.529011	X				0.9848	0.002	0				X				0.9848
NGL1	YOL042W	Putative endonuclease; has a domain similar to a magnesium-dependent endonuclease motif in mRNA deadenylase Ccr4p; the authentic, non-tagged protein is detected in highly purified mitochondria in high-throughput studies	0.650157	9.03115	0		X			0	0.9676	0.0034		X						0.9676
NIF3	YGL221C	Protein of unknown function; similar to Listeria monocytogenes major sigma factor (rpoD gene product); the authentic, non-tagged protein is detected in highly purified mitochondria in high-throughput studies	7.80795	4.21091	0.835772				X	0.0706	0.0002	0								0.0706
NIT2	YJL126W	Nit protein; one of two proteins in S. cerevisiae with similarity to the Nit domain of NitFhit from fly and worm and to the mouse and human Nit protein which interacts with the Fhit tumor suppressor; nitrilase superfamily member	2.22474	1.0422	0.360647				X	0	0	0.0018								0.0018
NIT3	YLR351C	Nit protein; one of two proteins in S. cerevisiae with similarity to the Nit domain of NitFhit from fly and worm and to the mouse and human Nit protein which interacts with the Fhit tumor suppressor; nitrilase superfamily member	11.3443	13.7848	0.454824	X				0.9823	0.0006	0				X				0.9823
NSP1	YJL041W	FG-nucleoporin component of central core of the nuclear pore complex; also part of the nuclear pore complex (NPC) nuclear basket; contributes directly to nucleocytoplasmic transport and maintenance of the NPC permeability barrier; found in stable complex with Nup82p, Gle2p and two other FG-nucleoporins (Nup159p and Nup116p); also found in stable complex with Nic96p and two other FG-nucleoproteins…	1.64579	2.1002	19.1143				X	0	0.0057	0.0147								0.0147
NTA1	YJR062C	Amidase; removes the amide group from N-terminal asparagine and glutamine residues to generate proteins with N-terminal aspartate and glutamate residues that are targets of ubiquitin-mediated degradation	1.68696	1.1601	0.247187				X	0	0	0.0202								0.0202
NUC1	YJL208C	Major mitochondrial nuclease; has RNAse and DNA endo- and exonucleolytic activities; roles in mitochondrial recombination, apoptosis and maintenance of polyploidy; involved in fragmentation of genomic DNA during PND (programmed nuclear destruction); encodes ortholog of mammalian endoG	0.431727	1.8837	0.260403			X		0	0.0304	0.83	X							0.83
NUM1	YDR150W	Protein required for nuclear migration; component of the mitochondria-ER-cortex-ancor (MECA); required for the association of mitochondria with the cell cortex and for accurate distribution of mitochondrial network; interacts with Mdm36p to link the ER and motochondria at the cortex; localizes to the mother cell cortex and the bud tip; may mediate interactions of dynein and cytoplasmic microtubul…	1.67205	3.13335	14.4769				X	0.0001	0.094	0.0072								0.094
NUP100	YKL068W	FG-nucleoporin component of central core of the nuclear pore complex; contributes directly to nucleocytoplasmic transport and maintenance of the nuclear pore complex (NPC) permeability barrier and is involved in gene tethering at the nuclear periphery; NUP100 has a paralog, NUP116, that arose from the whole genome duplication	12.0474	0.769349	2.40432				X	0	0	0								0
NUP116	YMR047C	FG-nucleoporin component of central core of the nuclear pore complex; contributes directly to nucleocytoplasmic transport and maintenance of the nuclear pore complex (NPC) permeability barrier; forms a stable association with Nup82p, Gle2p and two other FG-nucleoporins (Nsp1p and Nup159p); NUP116 has a paralog, NUP100, that arose from the whole genome duplication	11.7421	8.7615	11.721	X				0.9262	0.0002	0				X				0.9262
NUP57	YGR119C	FG-nucleoporin component of central core of the nuclear pore complex; contributes directly to nucleocytoplasmic transport and maintenance of the nuclear pore complex (NPC) permeability barrier; found in stable complex with Nic96p and two other FG-nucleoproteins (Nsp1p and Nup49p)	4.02013	13.0315	5.25944	X				0.7792	0.1694	0				X				0.7792
NVJ2	YPR091C	Lipid-binding ER protein, enriched at nucleus-vacuolar junctions (NVJ); may be involved in sterol metabolism or signaling at the NVJ; contains a synaptotagmin-like-mitochondrial-lipid binding protein (SMP) domain; binds phosphatidylinositols and other lipids in a large-scale study; may interact with ribosomes, based on co-purification experiments	2.06505	1.0365	13.5243				X	0	0	0.0037								0.0037
OAC1	YKL120W	Mitochondrial inner membrane transporter; transports oxaloacetate, sulfate, thiosulfate, and isopropylmalate; member of the mitochondrial carrier family	0.178953	0.16766	0.105668			X		0	0	0.9386		X						0.9386
OAR1	YKL055C	Mitochondrial 3-oxoacyl-[acyl-carrier-protein] reductase; may comprise a type II mitochondrial fatty acid synthase along with Mct1p	1.4121	6.49404	0.0728551		X			0.0021	0.8745	0.0009		X						0.8745
OCT1	YKL134C	Mitochondrial intermediate peptidase; cleaves destabilizing N-terminal residues of a subset of proteins upon import, after their cleavage by mitochondrial processing peptidase (Mas1p-Mas2p); may contribute to mitochondrial iron homeostasis	2.01669	9.88359	0.331015		X			0.0488	0.8733	0		X						0.8733
ODC1	YPL134C	Mitochondrial inner membrane transporter; 2-oxodicarboxylate transporter, exports 2-oxoadipate and 2-oxoglutarate from the mitochondrial matrix to the cytosol for lysine and glutamate biosynthesis and lysine catabolism; suppresses, in multicopy, an fmc1 null mutation; ODC1 has a paralog, ODC2, that arose from the whole genome duplication	0.18853	0.153996	0.271238			X		0	0	0.9457		X						0.9457
ODC2	YOR222W	Mitochondrial inner membrane transporter; 2-oxodicarboxylate transporter, exports 2-oxoadipate and 2-oxoglutarate from the mitochondrial matrix to the cytosol for use in lysine and glutamate biosynthesis and in lysine catabolism; ODC2 has a paralog, ODC1, that arose from the whole genome duplication	0.196796	0.178265	0.212961			X		0	0	0.9514		X						0.9514
OLA1	YBR025C	P-loop ATPase with similarity to human OLA1 and bacterial YchF; identified as specifically interacting with the proteasome; null mutant displays increased translation rate and increased readthrough of premature stop codons; protein abundance increases in response to hydrogen peroxide and to DNA replication stress	0.553523	4.58166	15.2712		X			0	0.8372	0.0737		X						0.8372
OLI1	Q0130	F0-ATP synthase subunit c (ATPase-associated proteolipid); encoded on the mitochondrial genome; mutation confers oligomycin resistance; expression is specifically dependent on the nuclear genes AEP1 and AEP2	--	0.0167647	##			X		#N/A	#N/A	#N/A		X						#N/A
OM14	YBR230C	Mitochondrial outer membrane receptor for cytosolic ribosomes; integral protein of the outer membrane that interacts with the nascent chain-associated complex (NAC) bound to ribosomes, contributing to co-translational mitochondrial import; interacts with porin (Por1p) and Om45p; abundance is decreased in cells grown in glucose relative to other carbon sources	0.400458	5.97847	0.164059		X			0	0.919	0.0306	X							0.919
OM45	YIL136W	Mitochondrial outer membrane protein of unknown function; major constituent of the outer membrane, located on the outer (cytosolic) face; interacts with porin (Por1p) and with Om14p; imported via the presequence pathway involving the TOM and TIM23 complexes, then assembled in the outer membrane by Mim1p; protein abundance increases in response to DNA replication stress	1.12137	2.6938	1.60872				X	0	0.1288	0.1121	X							0.1288
OMA1	YKR087C	Metalloendopeptidase of the mitochondrial inner membrane; important for adaptive responses to various homeostatic insults and preservation of normal mitochondrial function under damage-eliciting conditions; involved in turnover of membrane-embedded proteins; mediates degradation of Cox1p in coa2 mutant cells; member of a family of predicted membrane-bound metallopeptidases in prokaryotes and high…	0.179238	2.83229	0.157301			X		0	0.543	0.1958		X						0.543
OMS1	YDR316W	Protein integral to the mitochondrial membrane; has a conserved methyltransferase motif and is predicted to be an RNA methyltransferase; multicopy suppressor of respiratory defects caused by OXA1 mutations	0.246213	0.35538	0.297441			X		0	0	0.9631		X						0.9631
ORT1	YOR130C	Ornithine transporter of the mitochondrial inner membrane; exports ornithine from mitochondria as part of arginine biosynthesis; human ortholog is associated with hyperammonaemia-hyperornithinaemia-homocitrullinuria (HHH) syndrome	0.165306	0.226771	0			X		0	0	0.9213		X						0.9213
OSH2	YDL019C	Member of an oxysterol-binding protein family with seven members; in S. cerevisiae, family members have overlapping, redundant functions in sterol metabolism and collectively perform a function essential for viability; OSH2 has a paralog, SWH1, that arose from the whole genome duplication	0.532974	6.486	10.433		X			0	0.9402	0.017		X						0.9402
OSM1	YJR051W	Fumarate reductase, catalyzes the reduction of fumarate to succinate; required for the reoxidation of intracellular NADH under anaerobic conditions; mutations cause osmotic sensitivity; has two translation start sites, one at the annotated start codon which produces an ER-targeted form required for anaerobic growth, and one at codon 32 which produces a mitochondrially-targeted form; OSM1 has a pa…	13.7154	9.43856	1.4289	X				0.9391	0.0001	0				X				0.9391
OST2	YOR103C	Epsilon subunit of the oligosaccharyltransferase complex; located in the ER lumen; catalyzes asparagine-linked glycosylation of newly synthesized proteins	10.772	0.390274	0				X	0	0	0								0
OXA1	YER154W	Mitochondrial inner membrane insertase; mediates the insertion of both mitochondrial- and nuclear-encoded proteins from the matrix into the inner membrane; also has a role in insertion of carrier proteins into the inner membrane; acts as a voltage-gated ion channel, activated by substrate peptides; interacts with mitochondrial ribosomes; conserved from bacteria to animals	0.291091	0.11328	0.269658			X		0	0	0.965		X						0.965
PAM16	YJL104W	Subunit of the import motor (PAM complex); the PAM complex is a component of the Translocase of the Inner Mitochondrial membrane (TIM23 complex); forms a 1:1 subcomplex with Pam18p and inhibits its cochaperone activity; contains a J-like domain	0.869871	6.64802	0.377522		X			0.0001	0.9407	0.0052		X						0.9407
PAM17	YKR065C	Constituent of the TIM23 complex; proposed alternatively to be a component of the import motor (PAM complex) or to interact with and modulate the core TIM23 (Translocase of the Inner mitochondrial Membrane) complex; protein abundance increases in response to DNA replication stress	0.211837	0.933915	0.333245			X		0	0.0006	0.8957		X						0.8957
PAM18	YLR008C	Subunit of the import motor (PAM complex); the PAM complex is a component of the Translocase of the Inner Mitochondrial membrane (TIM23 complex); essential J-protein cochaperone that stimulates Ssc1p ATPase activity to drive import; inhibited by Pam16p	0.617094	9.6076	0		X			0	0.9685	0.0032		X						0.9685
PAN1	YIR006C	Part of actin cytoskeleton-regulatory complex Pan1p-Sla1p-End3p; associates with actin patches on cell cortex; promotes protein-protein interactions essential for endocytosis; binds to and activates Arp2/3 complex in vitro; phosphorylation of Thr-1225 is regulated by MAPK Hog1p in response to osmotic stress; previously thought to be a subunit of poly(A) ribonuclease	1.4234	3.0242	120.817				X	0	0.1305	0.0233								0.1305
PAN5	YHR063C	2-dehydropantoate 2-reductase; part of the pantothenic acid pathway, structurally homologous to E. coli panE	6.70851	13.756	0.601079	X				0.9675	0.0113	0				X				0.9675
PAR32	YDL173W	Putative protein of unknown function; hyperphosphorylated upon rapamycin treatment in a Tap42p-dependent manner; green fluorescent protein (GFP)-fusion protein localizes to the cytoplasm; PAR32 is not an essential gene	1.14338	1.86765	6.61187				X	0	0.0092	0.1736								0.1736
PBI2	YNL015W	Cytosolic inhibitor of vacuolar proteinase B (PRB1); required for efficient vacuole inheritance; with thioredoxin forms protein complex LMA1, which assists in priming SNARE molecules and promotes vacuole fusion; protein abundance increases in response to DNA replication stress	5.23974	7.89083	14.2756	X				0.8154	0.0243	0				X				0.8154
PBP1	YGR178C	Component of glucose deprivation induced stress granules; involved in P-body-dependent granule assembly; similar to human ataxin-2; interacts with Pab1p to regulate mRNA polyadenylation; interacts with Mkt1p to regulate HO translation; protein increases in abundance and relative distribution to the nucleus increases upon DNA replication stress	4.82499	5.5089	0.851844				X	0.3141	0.0192	0								0.3141
PBP4	YDL053C	Pbp1p binding protein; interacts strongly with Pab1p-binding protein 1 (Pbp1p) in the yeast two-hybrid system; also interacts with Lsm12p in a copurification assay; relative distribution to the nucleus increases upon DNA replication stress	5.6616	20.00*	1.62291	X				#N/A	#N/A	#N/A				X				#N/A
PCD1	YLR151C	8-oxo-dGTP diphosphatase; prevents spontaneous mutagenesis via sanitization of oxidized purine nucleoside triphosphates; can also act as peroxisomal pyrophosphatase with specificity for coenzyme A and CoA derivatives, may function to remove potentially toxic oxidized CoA disulfide from peroxisomes to maintain the capacity for beta-oxidation of fatty acids; nudix hydrolase family member; similar E…	5.01576	13.9267	0.405728	X				0.9103	0.0578	0				X				0.9103
PCP1	YGR101W	Mitochondrial serine protease; required for the processing of various mitochondrial proteins and maintenance of mitochondrial DNA and morphology; belongs to the rhomboid-GlpG superfamily of intramembrane peptidases	0.43699	0.293971	0			X		0	0	0.9623		X						0.9623
PCS60	YBR222C	Oxalyl-CoA synthetase; capable of catalyzing conversion of oxalate to oxalyl-CoA; catalyzes first step in pathway of oxalate degradation that functions to protect yeast from inhibitory effects of oxalate; peroxisomal protein that binds mRNA; localizes to both peroxisomal peripheral membrane and matrix, expression is highly inducible by oleic acid; similar to E. coli long chain acyl-CoA synthetase	6.23611	8.96267	2.20631	X				0.9137	0.0094	0				X				0.9137
PDA1	YER178W	E1 alpha subunit of the pyruvate dehydrogenase (PDH) complex; catalyzes the direct oxidative decarboxylation of pyruvate to acetyl-CoA; phosphorylated; regulated by glucose; PDH complex is concentrated in spots within the mitochondrial matrix, often near the ERMES complex and near peroxisomes	5.4928	21.9313	0.456673	X				0.8771	0.0952	0				X				0.8771
PDB1	YBR221C	E1 beta subunit of the pyruvate dehydrogenase (PDH) complex; PDH is an evolutionarily conserved multi-protein complex found in mitochondria	4.90498	24.7145	0.719399	X				0.7503	0.2103	0				X				0.7503
PDH1	YPR002W	Putative 2-methylcitrate dehydratase; mitochondrial protein that participates in respiration; induced by diauxic shift; homologous to E. coli PrpD, may take part in the conversion of 2-methylcitrate to 2-methylisocitrate	22.8137	21.3691	0.350543	X				0.9682	0.0001	0	X			X				0.9682
PDI1	YCL043C	Protein disulfide isomerase; multifunctional protein of ER lumen, essential for formation of disulfide bonds in secretory and cell-surface proteins, unscrambles non-native disulfide bonds; key regulator of Ero1p; forms complex with Mnl1p that has exomannosidase activity, processing unfolded protein-bound Man8GlcNAc2 oligosaccharides to Man7GlcNAc2, promoting degradation in unfolded protein respon…	4.70472	10.9424	8.18528	X				0.8806	0.0611	0				X				0.8806
PDX1	YGR193C	E3-binding protein of the mitochondrial pyruvate dehydrogenase complex; plays a structural role in the complex by binding and positioning dihydrolipoamide dehydrogenase (E3) to the dihydrolipoamide acetyltransferase (E2) core	1.98269	19.1791	0.517073		X			0.0361	0.9283	0		X						0.9283
PDX3	YBR035C	Pyridoxine (pyridoxamine) phosphate oxidase; has homologs in E. coli and Myxococcus xanthus; transcription is under the general control of nitrogen metabolism	4.09149	4.27786	69.2123				X	0.0412	0.0121	0			X					0.0412
PEP4	YPL154C	Vacuolar aspartyl protease (proteinase A); required for posttranslational precursor maturation of vacuolar proteinases; important for protein turnover after oxidative damage; plays a protective role in acetic acid induced apoptosis; synthesized as a zymogen, self-activates	4.62107	1.5286	43.7422				X	0	0	0								0
PET10	YKR046C	Protein of unknown function that localizes to lipid particles; localization suggests a role in lipid metabolism; expression pattern suggests a role in respiratory growth; computational analysis of large-scale protein-protein interaction data suggests a role in ATP/ADP exchange	0.59088	2.0101	7.17827			X		0	0.0383	0.7312	X							0.7312
PET100	YDR079W	Chaperone that facilitates the assembly of cytochrome c oxidase; integral to the mitochondrial inner membrane; interacts with a subcomplex of subunits VII, VIIa, and VIII (Cox7p, Cox9p, and Cox8p) but not with the holoenzyme	0.389909	7.93009	0		X			0	0.947	0.012		X						0.947
PET111	YMR257C	Mitochondrial translational activator specific for the COX2 mRNA; located in the mitochondrial inner membrane	0.03981	0.55212	0.0629203			X		0	0.0002	0.0002		X						0.0002
PET112	YBL080C	Subunit of the trimeric GatFAB AmidoTransferase(AdT) complex; involved in the formation of Q-tRNAQ; mutation is functionally complemented by the bacterial GatB ortholog	3.87198	3.22318	0.0838937				X	0.0023	0.002	0								0.0023
PET117	YER058W	Protein required for assembly of cytochrome c oxidase	1.4015	43.942	0.173031		X			0.0007	0.825	0		X						0.825
PET122	YER153C	Mitochondrial translational activator specific for the COX3 mRNA; acts together with Pet54p and Pet494p; located in the mitochondrial inner membrane	0.195061	4.3795	0.0988748		X			0	0.8086	0.0516		X						0.8086
PET123	YOR158W	Mitochondrial ribosomal protein of the small subunit; PET123 exhibits genetic interactions with PET122, which encodes a COX3 mRNA-specific translational activator	4.24619	12.1947	0.376515	X				0.8269	0.1197	0				X				0.8269
PET127	YOR017W	Protein with a role in 5'-end processing of mitochondrial RNAs; located in the mitochondrial membrane	1.02867	6.22118	0.212961		X			0.0002	0.9159	0.0041		X						0.9159
PET130	YJL023C	Protein required for respiratory growth; the authentic, non-tagged protein is detected in highly purified mitochondria in high-throughput studies	0.712447	1.16454	0			X		0	0.0003	0.7748		X						0.7748
PET191	YJR034W	Protein required for assembly of cytochrome c oxidase; exists as an oligomer; described as both an integral mitochondrial inner membrane protein facing the intermembrane space (IMS) and as a soluble IMS protein; contains a twin Cx9C motif; imported into the IMS via the MIA import machinery	4.98754	14.9713	0.320985	X				0.9032	0.067	0			X					0.9032
PET20	YPL159C	Mitochondrial protein; required for respiratory growth under some conditions and for stability of the mitochondrial genome	10.4085	10.9084	0	X				0.9695	0.0006	0				X				0.9695
PET309	YLR067C	Specific translational activator for the COX1 mRNA; binds to the COX1 mRNA; also influences stability of intron-containing COX1 primary transcripts; localizes to the mitochondrial inner membrane; contains 12 pentatricopeptide repeats (PPRs)	0.574187	3.95381	0		X			0	0.7279	0.1391		X						0.7279
PET494	YNR045W	Mitochondrial translational activator specific for the COX3 mRNA; acts together with Pet54p and Pet122p; located in the mitochondrial inner membrane	0.32229	2.2232	0			X		0	0.1258	0.7192		X						0.7192
PET54	YGR222W	Mitochondrial inner membrane protein; binds to the 5' UTR of the COX3 mRNA to activate its translation together with Pet122p and Pet494p; also binds to the COX1 Group I intron AI5 beta to facilitate exon ligation during splicing	0.803613	6.62528	0.0961282		X			0	0.943	0.0066		X						0.943
PET8	YNL003C	S-adenosylmethionine transporter of the mitochondrial inner membrane; member of the mitochondrial carrier family; required for biotin biosynthesis and respiratory growth	0.117188	0.088332	0			X		0	0	0.7269		X						0.7269
PEX14	YGL153W	Central component of the peroxisomal importomer complex; peroxisomal protein import machinery docking complex component; interacts with both PTS1 (Pex5p) and PTS2 (Pex7p), peroxisomal matrix protein signal recognition factors and membrane receptor Pex13p	1.34211	0.75469	1.27729				X	0	0	0.1289								0.1289
PEX19	YDL065C	Chaperone and import receptor for newly-synthesized class I PMPs; binds peroxisomal membrane proteins (PMPs) in the cytoplasm and delivers them to the peroxisome for subsequent insertion into the peroxisomal membrane; interacts with Myo2p and contributes to peroxisome partitioning	5.45437	6.4601	5.77036	X				0.6225	0.0146	0				X				0.6225
PEX30	YLR324W	Peroxisomal integral membrane protein; involved in negative regulation of peroxisome number; partially functionally redundant with Pex31p; genetic interactions suggest action at a step downstream of steps mediated by Pex28p and Pex29p; PEX30 has a paralog, PEX31, that arose from the whole genome duplication	0.66702	1.3571	3.60647			X		0	0.0014	0.7862		X						0.7862
PFK1	YGR240C	Alpha subunit of heterooctameric phosphofructokinase; involved in glycolysis, indispensable for anaerobic growth, activated by fructose-2,6-bisphosphate and AMP, mutation inhibits glucose induction of cell cycle-related genes	1.95128	2.483	##				X	0	0.0097	0.003								0.0097
PGI1	YBR196C	Glycolytic enzyme phosphoglucose isomerase; catalyzes the interconversion of glucose-6-phosphate and fructose-6-phosphate; required for cell cycle progression and completion of the gluconeogenic events of sporulation	1.64333	3.52998	69.8583				X	0.0003	0.192	0.0061								0.192
PGK1	YCR012W	3-phosphoglycerate kinase; catalyzes transfer of high-energy phosphoryl groups from the acyl phosphate of 1,3-bisphosphoglycerate to ADP to produce ATP; key enzyme in glycolysis and gluconeogenesis	2.05331	4.55633	53.0085				X	0.006	0.3137	0.0006								0.3137
PGS1	YCL004W	Phosphatidylglycerolphosphate synthase; catalyzes the synthesis of phosphatidylglycerolphosphate from CDP-diacylglycerol and sn-glycerol 3-phosphate in the first committed and rate-limiting step of cardiolipin biosynthesis	0.964712	11.2046	0		X			0.0003	0.9729	0.0005		X						0.9729
PHB1	YGR132C	Subunit of the prohibitin complex (Phb1p-Phb2p); prohibitin is a 1.2 MDa ring-shaped inner mitochondrial membrane chaperone that stabilizes newly synthesized proteins; determinant of replicative life span; involved in mitochondrial segregation; prohibitin deficiency induces a mitochondrial unfolded protein response (mtUPR)	0.228341	0.0773313	0.255627			X		0	0	0.948		X						0.948
PHB2	YGR231C	Subunit of the prohibitin complex (Phb1p-Phb2p); prohibitin is a 1.2 MDa ring-shaped inner mitochondrial membrane chaperone that stabilizes newly synthesized proteins; determinant of replicative life span; involved in mitochondrial segregation; prohibitin deficiency induces a mitochondrial unfolded protein response (mtUPR)	0.187708	0.0753396	0.371696			X		0	0	0.9271		X						0.9271
PHM7	YOL084W	Protein of unknown function; expression is regulated by phosphate levels; green fluorescent protein (GFP)-fusion protein localizes to the cell periphery and vacuole; protein abundance increases in response to DNA replication stress	0.213475	1.03409	##			X		0	0.0015	0.8842		X						0.8842
PHO88	YBR106W	Probable membrane protein; involved in phosphate transport; role in the maturation of secretory proteins; pho88 pho86 double null mutant exhibits enhanced synthesis of repressible acid phosphatase at high inorganic phosphate concentrations	0.35545	0.542035	3.65837			X		0	0	0.9623	X							0.9623
PIC2	YER053C	Mitochondrial copper and phosphate carrier; imports copper and inorganic phosphate into mitochondria; functionally redundant with Mir1p but less abundant than Mir1p under normal conditions; expression is induced at high temperature	0.166897	0.270153	0.169296			X		0	0	0.92		X						0.92
PIL1	YGR086C	Eisosome core component; eisosomes are large immobile cell cortex structures associated with endocytosis; detected in phosphorylated state in mitochondria; phosphorylated on Thr233 upon Pkc1p hyperactivation in a Slt2p MAPK-dependent fashion; null mutant shows activation of Pkc1p/Ypk1p stress resistance pathways; member of BAR domain family; protein increases in abundance and relocalizes from pla…	0.388978	21.7269	4.87496		X			0	0.8152	0.0023	X							0.8152
PIM1	YBL022C	ATP-dependent Lon protease; involved in degradation of misfolded proteins in mitochondria; required for biogenesis and maintenance of mitochondria	0.671884	14.4398	0.4707		X			0	0.9691	0.0009		X						0.9691
PKP1	YIL042C	Mitochondrial protein kinase; involved in negative regulation of pyruvate dehydrogenase complex activity by phosphorylating the ser-133 residue of the Pda1p subunit; acts in concert with kinase Pkp2p and phosphatases Ptc5p and Ptc6p	0.39555	6.58564	0		X			0	0.9328	0.0217		X						0.9328
PKP2	YGL059W	Mitochondrial protein kinase; negatively regulates activity of the pyruvate dehydrogenase complex by phosphorylating the ser-133 residue of the Pda1p subunit; acts in concert with kinase Pkp1p and phosphatases Ptc5p and Ptc6p; relocalizes from mitochondrion to cytoplasm upon DNA replication stress	0.478884	3.74119	0.375389		X			0	0.6746	0.1989		X						0.6746
PLB1	YMR008C	Phospholipase B (lysophospholipase) involved in lipid metabolism; required for efficient acyl chain remodeling of newly synthesized phosphatidylethanolamine-derived phosphatidylcholine; required for deacylation of phosphatidylcholine and phosphatidylethanolamine but not phosphatidylinositol; PLB1 has a paralog, PLB3, that arose from the whole genome duplication	1.80303	0.38298	##				X	0	0	0.0139								0.0139
PMT1	YDL095W	Protein O-mannosyltransferase of the ER membrane; transfers mannose from dolichyl phosphate-D-mannose to protein serine and threonine residues; 1 of 7 related proteins involved in O-glycosylation which is essential for cell wall rigidity; involved in ER quality control; amino terminus faces cytoplasm, carboxyl terminus faces ER lumen	0.50379	0.20552	3.83188			X		0	0	0.9478	X							0.9478
PMT2	YAL023C	Protein O-mannosyltransferase of the ER membrane; transfers mannose residues from dolichyl phosphate-D-mannose to protein serine/threonine residues; involved in ER quality control; acts in a complex with Pmt1p, can instead interact with Pmt5p; antifungal drug target; PMT2 has a paralog, PMT3, that arose from the whole genome duplication	0.413713	0.21263	1.41683			X		0	0	0.9646	X							0.9646
PNS1	YOR161C	Protein of unknown function; has similarity to Torpedo californica tCTL1p, which is postulated to be a choline transporter, neither null mutation nor overexpression affects choline transport	0.15553	0.10557	1.57783			X		0	0	0.9		X						0.9
PNT1	YOR266W	Mitochondrial integral inner membrane protein; involved in membrane insertion of C-terminus of Cox2p, interacts genetically and physically with Cox18p; deletion mutant sensitive to the anti-Pneumocystis carinii drug pentamidine	0.311853	0.210032	0.133101			X		0	0	0.9711		X						0.9711
POM152	YMR129W	Glycoprotein subunit of transmembrane ring of nuclear pore complex; contributes to nucleocytoplasmic transport, nuclear pore complex (NPC) biogenesis and spindle pole body duplication; homologous to human NUP210	2.02893	1.1686	0				X	0	0	0.0041								0.0041
POR1	YNL055C	Mitochondrial porin (voltage-dependent anion channel); outer membrane protein required for maintenance of mitochondrial osmotic stability and mitochondrial membrane permeability; couples the glutathione pools of the intermembrane space (IMS) and the cytosol; interacts with Om45 and Om14 in the outer membrane; phosphorylated; protein abundance increases in response to DNA replication stress	0.273559	0.0743446	0.490868			X		0	0	0.9529	X							0.9529
POR2	YIL114C	Putative mitochondrial porin (voltage-dependent anion channel); not required for mitochondrial membrane permeability or mitochondrial osmotic stability; POR2 has a paralog, POR1, that arose from the whole genome duplication	0.300963	0.232012	0.0922831			X		0	0	0.9712	X							0.9712
POS5	YPL188W	Mitochondrial NADH kinase; phosphorylates NADH; also phosphorylates NAD(+) with lower specificity; required for the response to oxidative stress	7.38787	9.96815	0.447433	X				0.9519	0.0038	0				X				0.9519
POT1	YIL160C	3-ketoacyl-CoA thiolase with broad chain length specificity; cleaves 3-ketoacyl-CoA into acyl-CoA and acetyl-CoA during beta-oxidation of fatty acids	2.2671	3.8471	413.89				X	0.0026	0.1006	0.0004			X					0.1006
PPA2	YMR267W	Mitochondrial inorganic pyrophosphatase; required for mitochondrial function and possibly involved in energy generation from inorganic pyrophosphate	7.24429	19.423	0.174711	X				0.9658	0.0174	0				X				0.9658
PRD1	YCL057W	Zinc metalloendopeptidase; found in the cytoplasm and intermembrane space of mitochondria; with Cym1p, involved in degradation of mitochondrial proteins and of presequence peptides cleaved from imported proteins; protein abundance increases in response to DNA replication stress	6.97279	9.51511	1.09785	X				0.9401	0.0051	0				X				0.9401
PRX1	YBL064C	Mitochondrial peroxiredoxin with thioredoxin peroxidase activity; has a role in reduction of hydroperoxides; reactivation requires Trr2p and glutathione; induced during respiratory growth and oxidative stress; phosphorylated; protein abundance increases in response to DNA replication stress	3.58217	25.8033	0.914063	X				0.3587	0.5873	0				X				0.5873
PSA1	YDL055C	GDP-mannose pyrophosphorylase (mannose-1-phosphate guanyltransferase); synthesizes GDP-mannose from GTP and mannose-1-phosphate in cell wall biosynthesis; required for normal cell wall structure	1.08624	4.00511	18.7537		X			0	0.619	0.0324		X						0.619
PSD1	YNL169C	Phosphatidylserine decarboxylase of the mitochondrial inner membrane; converts phosphatidylserine to phosphatidylethanolamine; regulates mitochondrial fusion and morphology by affecting lipid mixing in the mitochondrial membrane and by influencing the ratio of long to short forms of Mgm1p; partly exposed to the mitochondrial intermembrane space	0.255534	7.10712	0.0194964		X			0	0.9102	0.0168		X						0.9102
PST2	YDR032C	Protein with similarity to a family of flavodoxin-like proteins; induced by oxidative stress in a Yap1p dependent manner; the authentic, non-tagged protein is detected in highly purified mitochondria in high-throughput studies; protein abundance increases in response to DNA replication stress; PST2 has a paralog, RFS1, that arose from the whole genome duplication	1.05995	9.63802	5.56708		X			0.0005	0.9664	0.0005		X						0.9664
PTC5	YOR090C	Mitochondrial type 2C protein phosphatase (PP2C); involved in regulation of pyruvate dehydrogenase activity by dephosphorylating the serine 133 of the Pda1p subunit; localizes to the intermembrane space and is imported via the presequence pathway and processed by the inner membrane protease (Imp1p-Imp2p); acts in concert with kinases Pkp1p and Pkp2p and phosphatase Ptc6p	2.90068	12.2972	0.498973	X				0.3575	0.5684	0			X					0.5684
PTC6	YCR079W	Mitochondrial type 2C protein phosphatase (PP2C); has similarity to mammalian PP1Ks; involved in mitophagy; null mutant is sensitive to rapamycin and has decreased phosphorylation of the Pda1 subunit of pyruvate dehydrogenase	1.77666	6.31574	0.538318				X	0.01	0.7733	0.0003								0.7733
PTC7	YHR076W	Type 2C serine/threonine protein phosphatase (PP2C); alternatively spliced to create two mRNA isoforms; protein from spliced form localizes to the mitochondria while the one from the unspliced form is localized to the nuclear envelope; activates coenzyme Q6 biosynthesis by dephosphorylation of demethoxy-Q6 hydroxylase Coq7p	3.78488	15.1042	0.589041	X				0.692	0.2619	0				X				0.692
PTH1	YHR189W	One of two mitochondrially-localized peptidyl-tRNA hydrolases; dispensable for respiratory growth on rich medium, but required for respiratory growth on minimal medium; see also PTH2	1.08016	1.92862	0.0814263				X	0	0.0139	0.2186								0.2186
PTH2	YBL057C	One of two mitochondrially-localized peptidyl-tRNA hydrolases; negatively regulates the ubiquitin-proteasome pathway via interactions with ubiquitin-like ubiquitin-associated proteins; dispensable for cell growth; see also PTH1	0.407898	0.232376	0			X		0	0	0.9657	X							0.9657
PUS2	YGL063W	Mitochondrial tRNA:pseudouridine synthase; acts at positions 27 and 28, but not at position 72; efficiently and rapidly targeted to mitochondria, specifically dedicated to mitochondrial tRNA modification; mutation also affects pseudouridylation of some nuclear-encoded mRNAs; PUS2 has a paralog, PUS1, that arose from the whole genome duplication	1.21585	1.8159	0				X	0	0.006	0.1299								0.1299
PUS4	YNL292W	Pseudouridine synthase; catalyzes only the formation of pseudouridine-55 (Psi55), a highly conserved tRNA modification, in mitochondrial and cytoplasmic tRNAs; also responsible for pseudouracil modification of some mRNAs; PUS4 overexpression leads to translational derepression of GCN4 (Gcd- phenotype)	3.55389	2.1116	0.830548				X	0	0.0001	0								0.0001
PUS6	YGR169C	tRNA:pseudouridine synthase; catalyzes the conversion of uridine to pseudouridine at position 31 in cytoplasmic and mitochondrial tRNAs; mutation of Asp168 to Ala abolishes enzyme activity; not essential for viability	1.6717	5.032	0				X	0.0029	0.6084	0.0014								0.6084
PUS9	YDL036C	Mitochondrial tRNA:pseudouridine synthase; catalyzes the formation of pseudouridine at position 32 in mitochondrial tRNAs; contains an N-terminal mitochondrial targeting sequence; PUS9 has a paralog, RIB2, that arose from the whole genome duplication	1.20618	8.75522	0.173031		X			0.0012	0.9545	0.0005		X						0.9545
PUT2	YHR037W	Delta-1-pyrroline-5-carboxylate dehydrogenase; nuclear-encoded mitochondrial protein involved in utilization of proline as sole nitrogen source; deficiency of the human homolog ALDH4A1 causes type II hyperprolinemia (HPII), an autosomal recessive inborn error of metabolism	13.8924	15.8652	1.24005	X				0.9838	0.0003	0				X				0.9838
QCR10	YHR001W-A	Subunit of the ubiqunol-cytochrome c oxidoreductase complex; this complex comprises part of the mitochondrial respiratory chain; members include Cobp, Rip1p, Cyt1p, Cor1p, Qcr2p, Qcr6p, Qcr7p, Qcr8p, Qcr9p, and Qcr10p and comprises part of the mitochondrial respiratory chain	0.38861	1.16116	0.305003			X		0	0.0007	0.9245		X						0.9245
QCR2	YPR191W	Subunit 2 of ubiquinol cytochrome-c reductase (Complex III); Complex III is a component of the mitochondrial inner membrane electron transport chain; phosphorylated; transcription is regulated by Hap1p, Hap2p/Hap3p, and heme	2.03694	25.7983	0.709336		X			0.0257	0.9305	0		X						0.9305
QCR6	YFR033C	Subunit 6 of the ubiquinol cytochrome-c reductase complex; the complex, also known as the cytochrome bc(1) complex or Complex III, is a component of the mitochondrial inner membrane electron transport chain; highly acidic protein; required for maturation of cytochrome c1; may be loosely associated with the complex since it is easily released into the intermembrane space	1.35879	31.292	0.151821		X			0.0017	0.9321	0		X	X					0.9321
QCR7	YDR529C	Subunit 7 of ubiquinol cytochrome-c reductase (Complex III); Complex III is a component of the mitochondrial inner membrane electron transport chain; oriented facing the mitochondrial matrix; N-terminus appears to play a role in complex assembly	0.500393	1.59967	0.525427			X		0	0.0075	0.8549		X						0.8549
QCR8	YJL166W	Subunit 8 of ubiquinol cytochrome-c reductase (Complex III); Complex III is a component of the mitochondrial inner membrane electron transport chain; oriented facing the intermembrane space; expression is regulated by Abf1p and Cpf1p	0.252459	0.0648446	1.38425			X		0	0	0.9451		X						0.9451
QCR9	YGR183C	Subunit 9 of ubiquinol cytochrome-c reductase (Complex III); Complex III is a component of the mitochondrial inner membrane electron transport chain; required for electron transfer at the ubiquinol oxidase site of the complex	--	0.383035	##			X		#N/A	#N/A	#N/A		X						#N/A
QRI7	YDL104C	Protein involved in threonylcarbamoyl adenosine biosynthesis; Sua5p and Qri7p are necessary and sufficient for RNA t6A modification in vitro; highly conserved mitochondrial protein; essential for t6A modification of mitochondrial tRNAs that decode ANN codons; similar to Kae1p and E. coli YgjD, both of which are also required for tRNA t6A modification; when directed to the cytoplasm, complements t…	2.56346	6.91626	0.282499				X	0.1229	0.5437	0								0.5437
RAD27	YKL113C	5' to 3' exonuclease, 5' flap endonuclease; required for Okazaki fragment processing and maturation, for long-patch base-excision repair and large loop repair (LLR), ribonucleotide excision repair; member of the S. pombe RAD2/FEN1 family; relocalizes to the cytosol in response to hypoxia	1.63227	11.9976	2.19172		X			0.0133	0.9478	0		X						0.9478
RAS1	YOR101W	GTPase involved in G-protein signaling in adenylate cyclase activation; plays a role in cell proliferation; localized to the plasma membrane; homolog of mammalian RAS proto-oncogenes; relative distribution to the nucleus increases upon DNA replication stress; RAS1 has a paralog, RAS2, that arose from the whole genome duplication	0.259534	0.545294	1.12702			X		0	0	0.9563		X						0.9563
RAS2	YNL098C	GTP-binding protein; regulates nitrogen starvation response, sporulation, and filamentous growth; farnesylation and palmitoylation required for activity and localization to plasma membrane; homolog of mammalian Ras proto-oncogenes; RAS2 has a paralog, RAS1, that arose from the whole genome duplication	0.358765	0.980083	9.76258			X		0	0.0002	0.9389		X						0.9389
RAX1	YOR301W	Protein involved in bud site selection during bipolar budding; localization requires Rax2p; has similarity to members of the insulin-related peptide superfamily	0.125448	0.17571	0.156803			X		0	0	0.8019		X						0.8019
RAX2	YLR084C	N-glycosylated protein; involved in the maintenance of bud site selection during bipolar budding; localization requires Rax1p; RAX2 mRNA stability is regulated by Mpt5p	0.486835	0.19284	0.461416			X		0	0	0.9509		X						0.9509
RCF1	YML030W	Cytochrome c oxidase subunit; required for assembly of the Complex III-Complex IV supercomplex, and for assembly of Cox13p and Rcf2p into cytochrome c oxidase; similar to Rcf2p, and either Rcf1p or Rcf2p is required for late-stage assembly of the Cox12p and Cox13p subunits and for cytochrome c oxidase activity; required for growth under hypoxic conditions; member of the hypoxia induced gene famil…	0.267614	0.250083	0.602554			X		0	0	0.9692		X						0.9692
RCF2	YNR018W	Cytochrome c oxidase subunit; has a role in assembly of respiratory supercomplexes; similar to Rcf1p, and either Rcf1p or Rcf2p is required for late-stage assembly of the Cox12p and Cox13p subunits and for cytochrome c oxidase activity; associates with the cytochrome c oxidase - cytochrome bc1 supercomplex; null mutant accumulates reactive oxygen species; member of the conserved hypoxia induced g…	0.197307	0.0960667	0.206164			X		0	0	0.9428		X						0.9428
RCR1	YBR005W	Protein of the ER membrane involved in cell wall chitin deposition; may function in the endosomal-vacuolar trafficking pathway, helping determine whether plasma membrane proteins are degraded or routed to the plasma membrane; RCR1 has a paralog, RCR2, that arose from the whole genome duplication	0.226045	0.319283	0.811457			X		0	0	0.9595		X						0.9595
RDI1	YDL135C	Rho GDP dissociation inhibitor; involved in the localization and regulation of Cdc42p and Rho1p; protein abundance increases in response to DNA replication stress	1.47783	3.80395	7.06268				X	0.0003	0.3484	0.0095								0.3484
RDL1	YOR285W	Thiosulfate sulfurtransferase; contains a rhodanese-like domain; localized to the mitochondrial outer membrane; protein abundance increases in response to DNA replication stress; similar to the human TSTD gene	1.04406	6.39236	3.70874		X			0.0002	0.9207	0.0034	X							0.9207
RDL2	YOR286W	Protein with rhodanese activity; contains a rhodanese-like domain similar to Rdl1p, Uba4p, Tum1p, and Ych1p; overexpression causes a cell cycle delay; null mutant displays elevated frequency of mitochondrial genome loss	9.1201	34.806	0.188761	X				0.891	0.0542	0				X				0.891
REX2	YLR059C	3'-5' RNA exonuclease; involved in 3'-end processing of U4 and U5 snRNAs, 5S and 5.8S rRNAs, and RNase P and RNase MRP RNA; localized to mitochondria and null suppresses escape of mtDNA to nucleus in yme1 yme2 mutants; RNase D exonuclease	2.03371	8.12187	0.242243		X			0.042	0.8247	0		X						0.8247
RFS1	YBR052C	Protein of unknown function; member of a flavodoxin-like fold protein family that includes Pst2p and Ycp4p; green fluorescent protein (GFP)-fusion protein localizes to the cytoplasm in a punctate pattern; RFS1 has a paralog, PST2, that arose from the whole genome duplication	1.11116	4.66086	0.655723		X			0.0001	0.7608	0.014		X						0.7608
RGI2	YIL057C	Protein of unknown function; involved in energy metabolism under respiratory conditions; expression induced under carbon limitation and repressed under high glucose; RGI2 has a paralog, RGI1, that arose from the whole genome duplication	2.3549	7.06984	##				X	0.0813	0.6476	0								0.6476
RHO1	YPR165W	GTP-binding protein of the rho subfamily of Ras-like proteins; involved in establishment of cell polarity; regulates protein kinase C (Pkc1p) and the cell wall synthesizing enzyme 1,3-beta-glucan synthase (Fks1p and Gsc2p)	0.351051	0.605019	0.988748			X		0	0	0.9598	X							0.9598
RHO2	YNL090W	Non-essential small GTPase of the Rho/Rac family of Ras-like proteins; involved in the establishment of cell polarity and in microtubule assembly	0.409454	0.651195	0.346776			X		0	0	0.9536		X						0.9536
RHO3	YIL118W	Non-essential small GTPase of the Rho/Rac family of Ras-like proteins; involved in the establishment of cell polarity; GTPase activity positively regulated by the GTPase activating protein (GAP) Rgd1p	0.181461	1.25947	0.515211			X		0	0.0121	0.7713		X						0.7713
RHO5	YNL180C	Non-essential small GTPase of the Rho/Rac family of Ras-like proteins; regulated by phosphorylation and ubiquitination; likely involved in protein kinase C (Pkc1p)-dependent signal transduction pathway that controls cell integrity	0.835482	1.38187	2.56615			X		0	0.0013	0.6022		X						0.6022
RIB3	YDR487C	3,4-dihydroxy-2-butanone-4-phosphate synthase (DHBP synthase); required for riboflavin biosynthesis from ribulose-5-phosphate, also has an unrelated function in mitochondrial respiration	4.36319	--	##	X				#N/A	#N/A	#N/A			X					#N/A
RIB4	YOL143C	Lumazine synthase (DMRL synthase); catalyzes synthesis of immediate precursor to riboflavin; DMRL synthase stands for 6,7-dimethyl-8-ribityllumazine synthase	2.2442	20.00**	76.1336	X				#N/A	#N/A	#N/A			X					#N/A
RIM1	YCR028C-A	ssDNA-binding protein essential for mitochondrial genome maintenance; involved in mitochondrial DNA replication	24.2198	20.4453	0.692123	X				0.9646	0.0001	0				X				0.9646
RIM2	YBR192W	Mitochondrial pyrimidine nucleotide transporter; imports pyrimidine nucleoside triphosphates and exports pyrimidine nucleoside monophosphates; member of the mitochondrial carrier family	0.197768	0.0923377	0.210646			X		0	0	0.9419		X						0.9419
RIP1	YEL024W	Ubiquinol-cytochrome-c reductase; a Rieske iron-sulfur protein of the mitochondrial cytochrome bc1 complex; transfers electrons from ubiquinol to cytochrome c1 during respiration; during import, Rip1p is first imported into the mitochondrial matrix where it is processed, acquires its Fe-S cluster, and is folded, then is translocated into the inner membrane by the action of a homo-oligomer of Bcs1…	0.364466	22.9391	0.194154		X			0	0.7475	0.0025		X						0.7475
RMD9	YGL107C	Mitochondrial protein required for respiratory growth; mutant phenotype and genetic interactions suggest a role in delivering mt mRNAs to ribosomes; located on matrix face of the inner membrane and loosely associated with mitoribosomes; RMD9 has a paralog, YBR238C, that arose from the whole genome duplication	0.527616	16.2447	0.116744		X			0	0.9508	0.0015		X						0.9508
RML2	YEL050C	Mitochondrial ribosomal protein of the large subunit (L2); has similarity to E. coli L2 ribosomal protein; mutant allele (fat21) causes inability to utilize oleate, and induce oleic acid oxidation; may interfere with activity of the Adr1p transcription factor	1.14031	0.807196	0.253216				X	0	0	0.3008								0.3008
RPL10	YLR075W	Ribosomal 60S subunit protein L10; responsible for joining the 40S and 60S subunits; regulates translation initiation; similar to members of the QM gene family; homologous to mammalian ribosomal protein L10 and bacterial L16; protein abundance increases in response to DNA replication stress; mutations in the human ortholog are associated with development of T-cell acute lymphoblastic leukemia and…	0.35249	2.4296	31.1058			X		0	0.1827	0.6581		X						0.6581
RPL25	YOL127W	Ribosomal 60S subunit protein L25; primary rRNA-binding ribosomal protein component of large ribosomal subunit; binds to 25S rRNA via a conserved C-terminal motif; homologous to mammalian ribosomal protein L23A and bacterial L23	0.956855	3.75339	73.0311				X	0	0.5963	0.0671								0.5963
RPL38	YLR325C	Ribosomal 60S subunit protein L38; homologous to mammalian ribosomal protein L38, no bacterial homolog	5.46119	8.99962	17.4012	X				0.89	0.0211	0				X				0.89
RPM2	YML091C	Protein subunit of mitochondrial RNase P; has roles in nuclear transcription, cytoplasmic and mitochondrial RNA processing, and mitochondrial translation; distributed to mitochondria, cytoplasmic processing bodies, and the nucleus	0.200319	3.405	0		X			0	0.6826	0.1351		X						0.6826
RPO41	YFL036W	Mitochondrial RNA polymerase; single subunit enzyme similar to those of T3 and T7 bacteriophages; requires a specificity subunit encoded by MTF1 for promoter recognition; Mtf1p interacts with and stabilizes the Rpo41p-promoter complex, enhancing DNA bending and melting to facilitate pre-initiation open complex formation	0.461331	3.88786	0.0316399		X			0	0.7143	0.1719		X						0.7143
RPP2A	YOL039W	Ribosomal protein P2 alpha; a component of the ribosomal stalk, which is involved in the interaction between translational elongation factors and the ribosome; free (non-ribosomal) P2 stimulates the phosphorylation of the eIF2 alpha subunit (Sui2p) by Gcn2p; regulates the accumulation of P1 (Rpp1Ap and Rpp1Bp) in the cytoplasm	1.77148	2.8154	4.34898				X	0	0.0376	0.0056								0.0376
RPS13	YDR064W	Protein component of the small (40S) ribosomal subunit; homologous to mammalian ribosomal protein S13 and bacterial S15	0.376655	0.98237	14.5261			X		0	0.0002	0.9379		X						0.9379
RPS20	YHL015W	Protein component of the small (40S) ribosomal subunit; overproduction suppresses mutations affecting RNA polymerase III-dependent transcription; homologous to mammalian ribosomal protein S20 and bacterial S10	0.888369	3.95913	69.7252				X	0	0.6826	0.0643								0.6826
RPS29B	YDL061C	Protein component of the small (40S) ribosomal subunit; homologous to mammalian ribosomal protein S29 and bacterial S14; RPS29B has a paralog, RPS29A, that arose from the whole genome duplication	4.11591	0.156	11.5708				X	0	0	0								0
RPS3	YNL178W	Protein component of the small (40S) ribosomal subunit; has apurinic/apyrimidinic (AP) endonuclease activity; essential for viability; homologous to mammalian ribosomal protein S3 and bacterial S3	0.383541	3.41631	13.809				X	0	0.5845	0.2841								0.5845
RPS5	YJR123W	Protein component of the small (40S) ribosomal subunit; least basic of non-acidic ribosomal proteins; phosphorylated in vivo; essential for viability; homologous to mammalian ribosomal protein S5 and bacterial S7	0.340522	1.25412	##			X		0	0.0019	0.9181		X						0.9181
RRF1	YHR038W	Mitochondrial ribosome recycling factor; essential for mitochondrial protein synthesis and for the maintenance of the respiratory function of mitochondria	10.0925	14.9683	0.4666	X				0.9837	0.0015	0				X				0.9837
RRG1	YDR065W	Protein of unknown function; required for vacuolar acidification and mitochondrial genome maintenance; the authentic, non-tagged protein is detected in highly purified mitochondria in high-throughput studies	0.307721	3.8779	0		X			0	0.734	0.1577		X						0.734
RRG7	YOR305W	Protein of unknown function; green fluorescent protein (GFP)-fusion protein localizes to the mitochondrion; deletion confers sensitivity to 4-(N-(S-glutathionylacetyl)amino) phenylarsenoxide (GSAO); YOR305W is not an essential gene	0.300358	4.2233	0.115354		X			0	0.7932	0.1112		X						0.7932
RRG8	YPR116W	Putative protein of unknown function; required for mitochondrial genome maintenance; null mutation results in a decrease in plasma membrane electron transport	0.936466	8.30876	0		X			0.0002	0.9614	0.0015		X						0.9614
RRG9	YNL213C	Protein of unknown function; null mutant lacks mitochondrial DNA and cannot grow on glycerol; the authentic, non-tagged protein is detected in highly purified mitochondria in high-throughput studies	12.858	4.08328	0.532403				X	0.0394	0	0								0.0394
RSM10	YDR041W	Mitochondrial ribosomal protein of the small subunit; has similarity to E. coli S10 ribosomal protein; essential for viability, unlike most other mitoribosomal proteins	1.30924	15.0936	0.230708		X			0.0031	0.9699	0		X						0.9699
RSM18	YER050C	Mitochondrial ribosomal protein of the small subunit; has similarity to E. coli S18 ribosomal protein	2.97976	18.6426	0.573956	X				0.3009	0.6521	0				X				0.6521
RSM19	YNR037C	Mitochondrial ribosomal protein of the small subunit; has similarity to E. coli S19 ribosomal protein	7.41218	26.7494	0.477326	X				0.9276	0.045	0				X				0.9276
RSM22	YKL155C	Mitochondrial ribosomal protein of the small subunit; also predicted to be an S-adenosylmethionine-dependent RNA methyltransferase	1.3062	5.13444	0.0683579		X			0.0005	0.7718	0.0045		X						0.7718
RSM23	YGL129C	Mitochondrial ribosomal protein of the small subunit; has similarity to mammalian apoptosis mediator proteins; null mutation prevents induction of apoptosis by overproduction of metacaspase Mca1p	1.09832	16.9091	0.199477		X			0.001	0.9721	0.0001		X						0.9721
RSM24	YDR175C	Mitochondrial ribosomal protein of the small subunit	3.54505	14.17	0.315398	X				0.6246	0.3218	0				X				0.6246
RSM25	YIL093C	Mitochondrial ribosomal protein of the small subunit	3.4547	14.0582	0.163494	X				0.5913	0.3532	0				X				0.5913
RSM26	YJR101W	Mitochondrial ribosomal protein of the small subunit	1.727	12.4233	0		X			0.0195	0.9405	0		X						0.9405
RSM27	YGR215W	Mitochondrial ribosomal protein of the small subunit	4.23506	14.7045	0.109283	X				0.8088	0.1512	0				X				0.8088
RSM28	YDR494W	Mitochondrial ribosomal protein of the small subunit; genetic interactions suggest a possible role in promoting translation initiation	2.86799	12.0448	0.206347			X		0.3429	0.5801	0		X						0.5801
RSM7	YJR113C	Mitochondrial ribosomal protein of the small subunit; has similarity to E. coli S7 ribosomal protein	2.60582	4.5707	0.389739				X	0.0186	0.149	0.0001								0.149
RSP5	YER125W	E3 ubiquitin ligase of NEDD4 family; regulates many cellular processes including MVB sorting, heat shock response, transcription, endocytosis, ribosome stability; mutant tolerates aneuploidy; autoubiquitinates; ubiquitinates Sec23p and Sna3p; deubiquitinated by Ubp2p; activity regulated by SUMO ligase Siz1p, in turn regulates Siz1p SUMO ligase activity; required for efficient Golgi-to-ER traffick…	1.45155	6.01284	15.9188		X			0.002	0.8317	0.0012		X						0.8317
RSR1	YGR152C	GTP-binding protein of the Ras superfamily; required for bud site selection, morphological changes in response to mating pheromone, and efficient cell fusion; localized to the plasma membrane; significantly similar to mammalian Rap GTPases	0.441649	2.26816	0.20036			X		0	0.1029	0.7287		X						0.7287
RTC6	YPL183W-A	Protein involved in translation; mutants have defects in biogenesis of nuclear ribosomes; sequence similar to prokaryotic ribosomal protein L36, may be a mitochondrial ribosomal protein; protein abundance increases in response to DNA replication stress	1.67296	11.0203	0		X			0.0151	0.9391	0		X						0.9391
RTN1	YDR233C	Reticulon protein; stabilizes membrane curvature; involved in nuclear pore assembly and maintenance of tubular ER morphology; mutant overexpressing RTN1 shows increase in tubular ER; interacts with exocyst subunit Sec6p, Yip3p, and Sbh1p; more abundant than Rtn2p; member of the RTNLA subfamily; mutants have reduced phosphatidylserine transfer between the ER and mitochondria; RTN1 has a paralog, R…	0.37117	0.711731	5.93886			X		0	0	0.9538		X						0.9538
RTN2	YDL204W	Reticulon protein; stabilizes membrane curvature; involved in nuclear pore assembly and maintenance of tubular ER morphology; interacts with exocyst subunit Sec6p, Yip3p, and Sbh1p; much less abundant than Rtn1p; rtn1 rtn2 yop1 triple mutant lacks tubular ER; member of RTNLA (reticulon-like A) subfamily; protein increases in abundance and relocalizes to plasma membrane upon DNA replication stress…	0.507104	0.955885	43.428			X		0	0.0001	0.9159		X						0.9159
SAC1	YKL212W	Phosphatidylinositol phosphate (PtdInsP) phosphatase; involved in hydrolysis of PtdIns[4]P in the early and medial Golgi; regulated by interaction with Vps74p; ER localized transmembrane protein which cycles through the Golgi; involved in protein trafficking and processing, secretion, and cell wall maintenance; regulates sphingolipid biosynthesis through the modulation of PtdIns(4)P metabolism	0.385317	0.361767	2.20731			X		0	0	0.9667	X							0.9667
SAM35	YHR083W	Component of the sorting and assembly machinery (SAM) complex; the SAM (or TOB) complex is located in the mitochondrial outer membrane; the complex binds precursors of beta-barrel proteins and facilitates their insertion into the outer membrane	0.377874	12.4681	0.146814		X			0	0.9403	0.0043	X							0.9403
SAM37	YMR060C	Component of the Sorting and Assembly Machinery (SAM) complex; the SAM (or TOB) complex is located in the mitochondrial outer membrane; binds precursors of beta-barrel proteins and facilitates their outer membrane insertion; contributes to SAM complex stability	0.409155	23.8413	0.148312		X			0	0.7844	0.002	X							0.7844
SAM50	YNL026W	Component of the Sorting and Assembly Machinery (SAM) complex; the SAM (or TOB) complex is located in the mitochondrial outer membrane; the complex binds precursors of beta-barrel proteins and facilitates their outer membrane insertion; homologous to bacterial Omp85	0.252094	0.266134	0.122139			X		0	0	0.9671	X							0.9671
SAR1	YPL218W	GTPase, GTP-binding protein of the ARF family; component of COPII coat of vesicles; required for transport vesicle formation during ER to Golgi protein transport; lowers membrane rigidity helping in vesicle formation	0.525111	1.81348	4.41793			X		0	0.0192	0.8111		X						0.8111
SCEI	Q0160	I-SceI DNA endonuclease; encoded by the mitochondrial group I intron of the 21S_rRNA gene; mediates gene conversion that propagates the intron into intron-less copies of the 21S_rRNA gene	0.141	0.028113	##			X		0	0	0.6704		X						0.6704
SCM4	YGR049W	Mitochondrial outer membrane protein of unknown function; predicted to have 4 transmembrane segments; import is mediated by Tom70p and Mim1p; interacts genetically with a cdc4 mutation; SCM4 has a paralog, ATG33, that arose from the whole genome duplication	0.318585	2.60146	0.573956			X		0	0.2749	0.562	X							0.562
SCO1	YBR037C	Copper-binding protein of mitochondrial inner membrane; required for cytochrome c oxidase activity and respiration; may function to deliver copper to cytochrome c oxidase; similar to thioredoxins; SCO1 has a paralog, SCO2, that arose from the whole genome duplication	0.263312	0.40528	0.3749			X		0	0	0.964		X						0.964
SCO2	YBR024W	Protein anchored to mitochondrial inner membrane; may have a redundant function with Sco1p in delivery of copper to cytochrome c oxidase; interacts with Cox2p; SCO2 has a paralog, SCO1, that arose from the whole genome duplication	0.255841	0.37889	0.369132			X		0	0	0.9639		X						0.9639
SCS2	YER120W	Integral ER membrane protein, regulates phospholipid metabolism; one of 6 proteins (Ist2p, Scs2p, Scs22p, Tcb1p, Tcb2p, Tcb3p) that connect ER to the plasma membrane (PM) and regulate PI4P levels by controlling access of Sac1p phosphatase to its substrate PI4P in the PM; interacts with FFAT motif of Opi1p; involved in telomeric silencing; null shows inositol auxotrophy above 34 deg C; VAP homolog…	0.472295	0.483373	2.29913			X		0	0	0.9519	X							0.9519
SCW4	YGR279C	Cell wall protein with similarity to glucanases; scw4 scw10 double mutants exhibit defects in mating; SCW4 has a paralog, SCW10, that arose from the whole genome duplication	1.90483	3.11	4.9589				X	0.0002	0.0545	0.0026								0.0545
SDH1	YKL148C	Flavoprotein subunit of succinate dehydrogenase; couples the oxidation of succinate to the transfer of electrons to ubiquinone as part of the TCA cycle and the mitochondrial respiratory chain; FAD binding to Sdh1p is required for the assembly of the succinate dehydrogenase subunits; SDH1 has a paralog, YJL045W, that arose from the whole genome duplication	2.54498	21.3941	0.315008		X			0.1203	0.836	0		X						0.836
SDH2	YLL041C	Iron-sulfur protein subunit of succinate dehydrogenase; the complex couples the oxidation of succinate to the transfer of electrons to ubiquinone as part of the TCA cycle and the mitochondrial respiratory chain; other members are Sdh1p, Sdh3p, and Sdh4p	2.40654	24.7214	0.210756		X			0.0688	0.8856	0		X						0.8856
SDH3	YKL141W	Subunit of succinate dehydrogenase and of TIM22 translocase; functions as cytochrome b subunit of succinate dehydrogenase, which couples oxidation of succinate to transfer of electrons to ubiquinone as part of the TCA cycle and the mitochondrial respiratory chain; also required for mitochondrial inner membrane protein import as part of the TIM22 complex; SDH3 has a paralog, SHH3, that arose from …	0.359264	0.0426852	0.16611			X		0	0	0.9027		X						0.9027
SDH4	YDR178W	Membrane anchor subunit of succinate dehydrogenase (SDH); involved in coupling the oxidation of succinate to the transfer of electrons to ubiquinone as part of the TCA cycle and the mitochondrial respiratory chain; has similarity to human SDH subunit D (SDHD), which is implicated in paraganglioma	0.301668	1.8343	0.162853			X		0	0.0428	0.8224		X						0.8224
SDH5	YOL071W	Protein required for flavinylation of Sdh1p; binds to Sdh1p and promotes FAD cofactor attachment, which is necessary for succinate dehydrogenase (SDH) complex assembly and activity; mutations in human ortholog PGL2 are associated with neuroendocrine tumors (paraganglioma)	14.8446	16.9412	0.65324	X				0.9837	0.0003	0				X				0.9837
SDH6	YDR379C-A	Mitochondrial protein involved in assembly of succinate dehydrogenase; has a role in maturation of the Sdh2p subunit; member of the LYR protein family; mutations in human ortholog SDHAF1 are associated with infantile leukoencephalopathy	8.6077	17.0203	0	X				0.9809	0.0049	0				X				0.9809
SDH7	YDR511W	Mitochondrial protein involved in assembly of succinate dehydrogenase; has a role in maturation of the Sdh2p subunit; localized to the mitochondrial intermembrane space; required for acetate utilization and gluconeogenesis; mutation in Drosophila ortholog SDHAF3 causes reduced succinate dehydrogenase activity and neuronal and muscular dysfunction; member of the LYR protein family	10.3745	26.7251	0.283948	X				0.9682	0.0099	0				X				0.9682
SDH8	YBR269C	Protein required for assembly of succinate dehydrogenase; interacts with flavinylated Sdh1p and may function as a chaperone for free Sdh1p, protecting its FAD cofactor from redox reactions before assembly of the complex; soluble protein of the mitochondrial matrix; respiratory defect of null mutant is functionally complemented by Drosophila and human orthologs	21.0759	28.538	1.30589	X				0.9559	0.0007	0				X				0.9559
SEC4	YFL005W	Rab family GTPase; essential for vesicle-mediated exocytic secretion and autophagy; associates with the exocyst component Sec15p and may regulate polarized delivery of transport vesicles to the exocyst at the plasma membrane	0.178699	0.215119	1.62984			X		0	0	0.9377	X							0.9377
SEC63	YOR254C	Essential subunit of Sec63 complex; with Sec61 complex, Kar2p/BiP and Lhs1p forms a channel competent for SRP-dependent and post-translational SRP-independent protein targeting and import into the ER; other members are Sec62p, Sec66p, and Sec72p	0.35334	0.3387	4.42959			X		0	0	0.9691	X							0.9691
SEG1	YMR086W	Component of eisosome required for proper eisosome assembly; precedes Pil1p/Lsp1p during eisosome formation, controls eisosome length and shape; diffusely distributed, forms heterogeneous patches at plasma membrane in small buds, also found in medium and large buds; expression repressed by cAMP; similar to A. gossypii SEG gene and to S. pombe Sle1p, important for generating eisosomes; SEG1 has a …	6.89295	3.3224	4.75399				X	0.0065	0.0001	0								0.0065
SEN2	YLR105C	Subunit of the tRNA splicing endonuclease; tRNA splicing endonuclease is composed of Sen2p, Sen15p, Sen34p, and Sen54p; Sen2p contains the active site for tRNA 5' splice site cleavage and has similarity to Sen34p and to Archaeal tRNA splicing endonuclease	0.57129	1.1933	0			X		0	0.0005	0.8693	X							0.8693
SEN34	YAR008W	Subunit of the tRNA splicing endonuclease; tRNA splicing endonuclease is composed of Sen2p, Sen15p, Sen34p, and Sen54p; Sen34p contains the active site for tRNA 3' splice site cleavage and has similarity to Sen2p and to Archaeal tRNA splicing endonuclease	0.569587	10.2207	0.461416		X			0	0.9678	0.0032	X							0.9678
SEN54	YPL083C	Subunit of the tRNA splicing endonuclease; tRNA splicing endonuclease is composed of Sen2p, Sen15p, Sen34p, and Sen54p	0.215983	3.40624	0			X		0	0.6741	0.1579	X							0.6741
SFC1	YJR095W	Mitochondrial succinate-fumarate transporter; transports succinate into and fumarate out of the mitochondrion; required for ethanol and acetate utilization	0.185686	0.109851	0.406935			X		0	0	0.9386		X						0.9386
SFH5	YJL145W	Non-classical phosphatidylinositol transfer protein (PITP); exhibits PI- but not PC-transfer activity; localizes to the peripheral endoplasmic reticulum, cytosol and microsomes; similar to Sec14p; partially relocalizes to the plasma membrane upon DNA replication stress	2.61595	5.64005	1.95351				X	0.0663	0.3394	0								0.3394
SHE9	YDR393W	Protein required for normal mitochondrial morphology; mitochondrial inner membrane protein; may be involved in fission of the inner membrane; forms a homo-oligomeric complex	0.264396	0.378759	0.636005			X		0	0	0.9652		X						0.9652
SHH4	YLR164W	Putative alternate subunit of succinate dehydrogenase (SDH); mitochondrial inner membrane protein; genetic interaction with SDH4 suggests that Shh4p can function as a functional SDH subunit; a fraction copurifies with SDH subunit Sdh3p; expression induced by nitrogen limitation in a GLN3, GAT1-dependent manner; Shh4p has greater similarity to human SDHD (subunit D of SDH, implicated in paragangli…	0.236961	0.293396	1.73031			X		0	0	0.9635		X						0.9635
SHM1	YBR263W	Mitochondrial serine hydroxymethyltransferase; converts serine to glycine plus 5,10 methylenetetrahydrofolate; involved in generating precursors for purine, pyrimidine, amino acid, and lipid biosynthesis; reverse reaction generates serine	15.1926	35.679	0.609534	X				0.9304	0.0082	0				X				0.9304
SHY1	YGR112W	Mitochondrial inner membrane protein required for complex IV assembly; associates with complex IV assembly intermediates and complex III/complex IV supercomplexes; similar to human SURF1 involved in Leigh Syndrome; complex IV is also known as cytochrome c oxidase	0.213749	0.255611	0.103082			X		0	0	0.9578		X						0.9578
SIS1	YNL007C	Type II HSP40 co-chaperone that interacts with the HSP70 protein Ssa1p; shuttles between cytosol and nucleus; mediates delivery of misfolded proteins into the nucleus for degradation; involved in proteasomal degradation of misfolded cytosolic proteins; protein abundance increases in response to DNA replication stress; polyQ aggregates sequester Sis1p and interfere with clearance of misfolded prot…	2.84919	5.39725	45.7571				X	0.0766	0.2231	0								0.2231
SLC1	YDL052C	1-acyl-sn-glycerol-3-phosphate acyltransferase; catalyzes the acylation of lysophosphatidic acid to form phosphatidic acid, a key intermediate in lipid metabolism; enzymatic activity detected in lipid particles and microsomes	1.08817	1.8096	1.72127				X	0	0.0082	0.2256								0.2256
SLM1	YIL105C	Phosphoinositide PI4,5P(2) binding protein, forms a complex with Slm2p; acts downstream of Mss4p in a pathway regulating actin cytoskeleton organization in response to stress; phosphorylated by the TORC2 complex; protein abundance increases in response to DNA replication stress; SLM1 has a paralog, SLM2, that arose from the whole genome duplication	0.467659	10.5987	2.76849		X			0	0.961	0.0043		X						0.961
SLM3	YDL033C	tRNA-specific 2-thiouridylase; responsible for 2-thiolation of the wobble base of mitochondrial tRNAs; human ortholog is implicated in myoclonus epilepsy associated with ragged red fibers (MERRF)	1.78322	3.71425	0.0354935				X	0.0006	0.1928	0.003								0.1928
SLM5	YCR024C	Mitochondrial asparaginyl-tRNA synthetase	3.14981	13.5703	0	X				0.4651	0.4731	0				X				0.4731
SLN1	YIL147C	Transmembrane histidine phosphotransfer kinase and osmosensor; regulates MAP kinase cascade; transmembrane protein with an intracellular kinase domain that signals to Ypd1p and Ssk1p, thereby forming a phosphorelay system similar to bacterial two-component regulators	0.488053	0.47638	0			X		0	0	0.9492		X						0.9492
SLS1	YLR139C	Mitochondrial membrane protein; coordinates expression of mitochondrially-encoded genes; may facilitate delivery of mRNA to membrane-bound translation machinery	0.434696	9.05728	0.164233		X			0	0.9566	0.0073		X						0.9566
SMM1	YNR015W	Dihydrouridine synthase; member of a family of dihydrouridine synthases including Dus1p, Smm1p, Dus3p, and Dus4p; modifies uridine residues at position 20 of cytoplasmic tRNAs	3.8533	7.1137	0.0693553	X				0.5288	0.1277	0				X				0.5288
SNL1	YIL016W	Ribosome-associated protein; proposed to act in protein synthesis and nuclear pore complex biogenesis and maintenance as well as protein folding; has similarity to the mammalian BAG-1 protein	0.39467	0.05**	0.988748			X		#N/A	#N/A	#N/A		X						#N/A
SNU13	YEL026W	RNA binding protein; part of U3 snoRNP involved in rRNA processing, part of U4/U6-U5 tri-snRNP involved in mRNA splicing, similar to human 15.5K protein	1.33881	20.2988	0		X			0.0031	0.9658	0		X						0.9658
SOD1	YJR104C	Cytosolic copper-zinc superoxide dismutase; detoxifies superoxide; stabilizes Yck1p and Yck2p kinases in glucose to repress respiration; phosphorylated by Dun1p and enters the nucleus under oxidative stress to promote transcription of stress response genes; human ortholog implicated in ALS; abundance increases under DNA replication stress and during exposure to boric acid; localization of a fract…	16.4564	17.5927	16.6326	X				0.9821	0.0002	0			X					0.9821
SOD2	YHR008C	Mitochondrial manganese superoxide dismutase; protects cells against oxygen toxicity; phosphorylated	21.6442	23.5683	0.930342	X				0.9683	0.0002	0				X				0.9683
SOM1	YEL059C-A	Subunit of the mitochondrial inner membrane peptidase (IMP); IMP is required for maturation of mitochondrial proteins of the intermembrane space; Som1p facilitates cleavage of a subset of substrates; contains twin cysteine-x9-cysteine motifs	0.349031	0.538481	0.0692123			X		0	0	0.9627		X						0.9627
SOV1	YMR066W	Mitochondrial protein of unknown function	1.48076	5.69914	0.0629203		X			0.002	0.792	0.0015		X						0.792
SPF1	YEL031W	P-type ATPase, ion transporter of the ER membrane; required to maintain normal lipid composition of intracellular compartments and proper targeting of mitochondrial outer membrane tail-anchored proteins; involved in ER function and Ca2+ homeostasis; required for regulating Hmg2p degradation; confers sensitivity to a killer toxin (SMKT) produced by Pichia farinosa KK1	0.44276	0.30706	4.66542			X		0	0	0.9614	X							0.9614
SPG1	YGR236C	Protein required for high temperature survival during stationary phase; not required for growth on nonfermentable carbon sources; the authentic, non-tagged protein is detected in highly purified mitochondria in high-throughput studies	0.425031	14.2131	1.1074		X			0	0.9424	0.0029		X						0.9424
SPG4	YMR107W	Protein required for high temperature survival during stationary phase; not required for growth on nonfermentable carbon sources	5.26836	9.14619	##	X				0.8856	0.0267	0				X				0.8856
SPO14	YKR031C	Phospholipase D; catalyzes the hydrolysis of phosphatidylcholine, producing choline and phosphatidic acid; involved in Sec14p-independent secretion; required for meiosis and spore formation; differently regulated in secretion and meiosis; participates in transcription initiation and/or early elongation of specific genes; interacts with foot domain of RNA polymerase II; deletion results in abnorma…	0.39783	2.1699	0.901619			X		0	0.0857	0.7619		X						0.7619
SPO73	YER046W	Meiosis-specific protein of unknown function; required for spore wall formation during sporulation; dispensible for both nuclear divisions during meiosis	0.445314	7.06708	2.70486		X			0	0.9447	0.0154		X						0.9447
SPS19	YNL202W	Peroxisomal 2,4-dienoyl-CoA reductase; auxiliary enzyme of fatty acid beta-oxidation; homodimeric enzyme required for growth and sporulation on petroselineate medium; expression induced during late sporulation and in the presence of oleate	6.31073	2.86739	7.85696				X	0.0012	0	0								0.0012
SPT6	YGR116W	Nucleosome remodeling protein; functions in various aspects of transcription, chromatin maintenance, and RNA processing; required for the maintenance of chromatin structure during transcription in order to inhibit transcription from promoters within the coding region; required for H3K36 trimethylation but not dimethylation by Set2p	--	0.113377	##			X		#N/A	#N/A	#N/A		X						#N/A
SSC1	YJR045C	Hsp70 family ATPase; constituent of the import motor component of the Translocase of the Inner Mitochondrial membrane (TIM23 complex); involved in protein translocation and folding; subunit of SceI endonuclease; SSC1 has a paralog, ECM10, that arose from the whole genome duplication	3.84051	25.4641	0.562605	X				0.4532	0.4948	0				X				0.4948
SSO1	YPL232W	Plasma membrane t-SNARE; involved in fusion of secretory vesicles at the plasma membrane and in vesicle fusion during sporulation; forms a complex with Sec9p that binds v-SNARE Snc2p; syntaxin homolog; functionally redundant with Sso2p; SSO1 has a paralog, SSO2, that arose from the whole genome duplication	0.67724	0.430575	1.1721			X		0	0	0.8806		X						0.8806
SSO2	YMR183C	Plasma membrane t-SNARE; involved in fusion of secretory vesicles at the plasma membrane; syntaxin homolog that is functionally redundant with Sso1p; SSO2 has a paralog, SSO1, that arose from the whole genome duplication	0.272367	0.33789	0.805702			X		0	0	0.9676		X						0.9676
SSQ1	YLR369W	Mitochondrial hsp70-type molecular chaperone; required for assembly of iron/sulfur clusters into proteins at a step after cluster synthesis, and for maturation of Yfh1p, which is a homolog of human frataxin implicated in Friedreich's ataxia	3.27745	8.65458	1.27708	X				0.4838	0.3262	0				X				0.4838
STE18	YJR086W	G protein gamma subunit; forms a dimer with Ste4p to activate the mating signaling pathway, forms a heterotrimer with Gpa1p and Ste4p to dampen signaling; C-terminus is palmitoylated and farnesylated, which are required for normal signaling	0.277848	1.76326	0.901619			X		0	0.0387	0.822		X						0.822
STE23	YLR389C	Metalloprotease; involved in N-terminal processing of pro-a-factor to the mature form; expressed in both haploids and diploids; member of the insulin-degrading enzyme family; homolog Axl1p is also involved in processing of pro-a-factor	4.23133	6.61567	1.2823	X				0.5186	0.0685	0				X				0.5186
STE24	YJR117W	Highly conserved zinc metalloprotease; functions in two steps of a-factor maturation, C-terminal CAAX proteolysis and the first step of N-terminal proteolytic processing; contains multiple transmembrane spans	0.278498	0.19631	1.55728			X		0	0	0.9701	X							0.9701
STE4	YOR212W	G protein beta subunit; forms a dimer with Ste18p to activate the mating signaling pathway, forms a heterotrimer with Gpa1p and Ste18p to dampen signaling; may recruit Rho1p to the polarized growth site during mating; contains WD40 repeats	0.359426	8.47762	0.30054		X			0	0.9448	0.0105		X						0.9448
STF1	YDL130W-A	Protein involved in regulation of the mitochondrial F1F0-ATP synthase; Stf1p and Stf2p act as stabilizing factors that enhance inhibitory action of the Inh1p protein; protein abundance increases in response to DNA replication stress; STF1 has a paralog, INH1, that arose from the whole genome duplication	24.4839	23.4278	0.526749	X				0.9595	0.0001	0				X				0.9595
STT4	YLR305C	Phosphatidylinositol-4-kinase; functions in the Pkc1p protein kinase pathway; required for normal vacuole morphology, cell wall integrity, and actin cytoskeleton organization	0.919384	2.48106	0.692123				X	0	0.114	0.2838								0.2838
SUA5	YGL169W	Protein involved in threonylcarbamoyl adenosine biosynthesis; Sua5p and Qri7p are necessary and sufficient for RNA t6A modification in vitro; null mutant lacks N6-threonylcarbamoyl adenosine (t6A) modification in the anticodon loop of ANN-decoding tRNA; member of conserved YrdC/Sua5 family; binds single-stranded telomeric DNA and null mutant has abnormal telomere length	1.7785	1.5703	0				X	0	0.0003	0.0105								0.0105
SUR7	YML052W	Plasma membrane protein, component of eisosomes; long-lived protein that remains stable in eisosomes of mother cells while other eisosome proteins, Pil1p and Lsp1p, turn over; may function to anchor the eisosome in place; sporulation and plasma membrane sphingolipid content are altered in mutants; localizes to furrow-like invaginations (MCC patches)	0.299999	0.135536	0.958325			X		0	0	0.9679		X						0.9679
SUV3	YPL029W	ATP-dependent RNA helicase; component of the mitochondrial degradosome along with the RNase Dss1p; the degradosome associates with the ribosome and mediates RNA turnover; also required during splicing of the COX1 AI5_beta intron	0.690912	6.92849	0.1695		X			0	0.9507	0.008		X						0.9507
SWS2	YNL081C	Putative mitochondrial ribosomal protein of the small subunit; has similarity to E. coli S13 ribosomal protein; participates in controlling sporulation efficiency; localizes to vacuole in response to H2O2	1.91796	3.42721	0				X	0.0004	0.0971	0.0021								0.0971
SYM1	YLR251W	Protein required for ethanol metabolism; induced by heat shock and localized to the inner mitochondrial membrane; homologous to mammalian peroxisomal membrane protein Mpv17	0.20314	0.145747	0			X		0	0	0.9534		X						0.9534
SYP1	YCR030C	Negative regulator of WASP-Arp23 complex; involved in endocytic site formation; directly inhibits Las17p stimulation of Arp23 complex-mediated actin assembly in vitro; may regulate assembly and disassembly of the septin ring; colocalizes and interacts with septin subunits; potential role in actin cytoskeletal organization	1.13985	2.79968	45.9825				X	0	0.1543	0.0953								0.1543
TAM41	YGR046W	Mitochondrial phosphatidate cytidylyltransferase (CDP-DAG synthase); required for cardiolipin biosynthesis; viability of null mutant is strain-dependent; mRNA is targeted to the bud; mutant displays defect in mitochondrial protein import, likely due to altered membrane lipid composition	0.317748	1.1309	0			X		0	0.0009	0.9265		X						0.9265
TAT1	YBR069C	Amino acid transporter for valine, leucine, isoleucine, and tyrosine; low-affinity tryptophan and histidine transporter; overexpression confers FK506 and FTY720 resistance; protein abundance increases in response to DNA replication stress	0.184754	0.498355	1.28803			X		0	0	0.9179		X						0.9179
TAZ1	YPR140W	Lyso-phosphatidylcholine acyltransferase; required for normal phospholipid content of mitochondrial membranes; major determinant of the final acyl chain composition of the mitochondrial-specific phospholipid cardiolipin; mutations in human ortholog tafazzin cause Barth syndrome, a rare X-linked disease characterized by skeletal and cardiomyopathy and bouts of cyclic neutropenia	0.386372	6.39095	0.574593		X			0	0.928	0.0244		X						0.928
TCB1	YOR086C	Lipid-binding ER protein involved in ER-plasma membrane tethering; one of 6 proteins (Ist2p, Scs2p, Scs22p, Tcb1p, Tcb2p, Tcb3p) that connect ER to plasma membrane and regulate PI4P levels by controlling access of Sac1p phosphatase to its substrate PI4P in PM; contains 3 calcium and lipid binding domains; non-tagged protein also localizes to mitochondria; C-termini of Tcb1p, Tcb2p and Tcb3p inter…	0.423121	0.450255	17.9952			X		0	0	0.9605		X						0.9605
TCB3	YML072C	Cortical ER protein involved in ER-plasma membrane tethering; one of 6 proteins (Ist2p, Scs2p, Scs22p, Tcb1p, Tcb2p, Tcb3p) that connect ER to the plasma membrane (PM) and regulate PM phosphatidylinositol-4-phosphate (PI4P) levels by controlling access of Sac1p phosphatase to its substrate PI4P in the PM; localized to the bud via specific mRNA transport; non-tagged protein detected in a phosphory…	0.415996	0.738603	16.3341			X		0	0	0.9484		X						0.9484
TCD1	YHR003C	tRNA threonylcarbamoyladenosine dehydratase; required for the ct6A tRNA base modification, where an adenosine at position 37 is modified to form a cyclized active ester with an oxazolone ring; localized to the mitochondrial outer membrane; TCD1 has a paralog, TCD2, that arose from the whole genome duplication	0.366672	0.616929	0.189995			X		0	0	0.9586	X							0.9586
TCD2	YKL027W	tRNA threonylcarbamoyladenosine dehydratase; required for the ct6A tRNA base modification, where an adenosine at position 37 is modified to form a cyclized active ester with an oxazolone ring; localized to the mitochondrial outer membrane; TCD2 has a paralog, TCD1, that arose from the whole genome duplication	0.373196	0.714292	0.198985			X		0	0	0.9536	X							0.9536
TCM62	YBR044C	Protein involved in assembly of the succinate dehydrogenase complex; mitochondrial; putative chaperone	3.15298	15.9239	0.113257	X				0.4284	0.5205	0				X				0.5205
TDH1	YJL052W	Glyceraldehyde-3-phosphate dehydrogenase (GAPDH), isozyme 1; involved in glycolysis and gluconeogenesis; tetramer that catalyzes the reaction of glyceraldehyde-3-phosphate to 1,3 bis-phosphoglycerate; detected in the cytoplasm and cell wall; protein abundance increases in response to DNA replication stress; GAPDH-derived antimicrobial peptides secreted by S. cerevisiae are active against a wide v…	2.05324	0.467479	82.2589				X	0	0	0.0044								0.0044
TDH2	YJR009C	Glyceraldehyde-3-phosphate dehydrogenase (GAPDH), isozyme 2; involved in glycolysis and gluconeogenesis; tetramer that catalyzes reaction of glyceraldehyde-3-phosphate to 1,3 bis-phosphoglycerate; detected in cytoplasm and cell wall; protein abundance increases in response to DNA replication stress; GAPDH-derived antimicrobial peptides are active against a wide variety of wine-related yeasts and …	1.49502	0.54721	72.8349				X	0	0	0.0661								0.0661
TDH3	YGR192C	Glyceraldehyde-3-phosphate dehydrogenase (GAPDH), isozyme 3; involved in glycolysis and gluconeogenesis; tetramer that catalyzes the reaction of glyceraldehyde-3-phosphate to 1,3 bis-phosphoglycerate; detected in the cytoplasm and cell wall; GAPDH-derived antimicrobial peptides secreted by S. cerevisiae are active against a wide variety of wine-related yeasts and bateria; binds AU-rich RNA; TDH3 …	2.90809	0.6505	74.8736				X	0	0	0.0001								0.0001
TES1	YJR019C	Peroxisomal acyl-CoA thioesterase; likely to be involved in fatty acid oxidation rather than fatty acid synthesis; conserved protein also found in human peroxisomes; TES1 mRNA levels increase during growth on fatty acids	6.85392	14.4416	0.465499	X				0.9695	0.0111	0				X				0.9695
TGL2	YDR058C	Triacylglycerol lipase that is localized to the mitochondria; has lipolytic activity towards triacylglycerols and diacylglycerols when expressed in E. coli	1.19753	5.76412	0		X			0.0004	0.8665	0.0035		X						0.8665
TIM10	YHR005C-A	Essential protein of the mitochondrial intermembrane space; forms a complex with Tim9p (TIM10 complex) that delivers hydrophobic proteins to the TIM22 complex for insertion into the inner membrane	11.2008	23.7433	0.432026	X				0.9789	0.0043	0			X					0.9789
TIM11	YDR322C-A	Subunit e of mitochondrial F1F0-ATPase; ATPase is a large, evolutionarily conserved enzyme complex required for ATP synthesis; essential for the dimeric and oligomeric state of ATP synthase, which in turn determines the shape of inner membrane cristae	0.347855	0.936657	0.463655			X		0	0.0001	0.9418		X						0.9418
TIM12	YBR091C	Essential protein of the inner mitochondrial membrane; peripherally localized; component of the TIM22 complex, which is a twin-pore translocase that mediates insertion of numerous multispanning inner membrane proteins	3.28366	11.3748	0.532403	X				0.5411	0.373	0			X					0.5411
TIM13	YGR181W	Mitochondrial intermembrane space protein; forms a complex with Tim8p that delivers a subset of hydrophobic proteins to the TIM22 complex for insertion into the inner membrane	16.3696	26.4261	0.259546	X				0.9732	0.0013	0			X					0.9732
TIM17	YJL143W	Essential component of the TIM23 complex; with Tim23p, contributes to the architecture and function of the import channel; may link the import motor to the core Translocase of the Inner Mitochondrial membrane (TIM23 complex)	0.22517	1.95265	0			X		0	0.1118	0.6804		X						0.6804
TIM21	YGR033C	Nonessential component of the TIM23 complex; interacts with the Translocase of the Outer Mitochondrial membrane (TOM complex) and with respiratory enzymes; may regulate the Translocase of the Inner Mitochondrial membrane (TIM23 complex) activity	0.202199	0.120758	0.143198			X		0	0	0.9505		X						0.9505
TIM22	YDL217C	Essential core component of the mitochondrial TIM22 complex; involved in insertion of polytopic proteins into the inner membrane; forms the channel through which proteins are imported	0.235351	1.94642	0.329583			X		0	0.1006	0.7066		X						0.7066
TIM23	YNR017W	Essential component of the TIM23 complex; involved in protein import into mitochondrial matrix and inner membrane; with Tim17p, contributes to architecture and function of the import channel; TIM23 complex is short for the translocase of the inner mitochondrial membrane	0.271864	0.252056	0.089789			X		0	0	0.9696		X						0.9696
TIM44	YIL022W	Essential component of the TIM23 complex; tethers the import motor and regulatory factors (PAM complex) to the translocation channel (Tim23p-Tim17p core complex); TIM23 complex is short for the translocase of the inner mitochondrial membrane	1.13898	20.1737	0.567488		X			0.0011	0.9672	0		X						0.9672
TIM50	YPL063W	Essential component of the TIM23 complex; acts as receptor for the translocase of the inner mitochondrial membrane (TIM23) complex guiding incoming precursors from the TOM complex; may control the gating of the Tim23p-Tim17p channel	0.260951	0.604043	0.177707			X		0	0	0.9531		X						0.9531
TIM54	YJL054W	Component of the mitochondrial TIM22 complex; involved in insertion of polytopic proteins into the inner membrane	0.225314	0.197434	0.125841			X		0	0	0.9625		X						0.9625
TIM8	YJR135W-A	Mitochondrial intermembrane space protein; forms a complex with Tim13p that delivers a subset of hydrophobic proteins to the TIM22 complex for inner membrane insertion; homolog of human TIMM8A, implicated in Mohr-Tranebjaerg syndrome	16.6491	36.3965	0.559023	X				0.9221	0.0064	0			X					0.9221
TIM9	YEL020W-A	Essential protein of the mitochondrial intermembrane space; forms a complex with Tim10p (TIM10 complex) that delivers hydrophobic proteins to the TIM22 complex for insertion into the inner membrane	6.77059	20.1782	0.597517	X				0.954	0.0273	0			X					0.954
TKL1	YPR074C	Transketolase; catalyzes conversion of xylulose-5-phosphate and ribose-5-phosphate to sedoheptulose-7-phosphate and glyceraldehyde-3-phosphate in the pentose phosphate pathway; needed for synthesis of aromatic amino acids; TKL1 has a paralog, TKL2, that arose from the whole genome duplication	1.39171	4.7102	##				X	0.0006	0.6607	0.0052								0.6607
TMA19	YKL056C	Protein that associates with ribosomes; homolog of translationally controlled tumor protein; green fluorescent protein (GFP)-fusion protein localizes to the cytoplasm and relocates to the mitochondrial outer surface upon oxidative stress	1.5522	6.27707	48.4486		X			0.0038	0.8302	0.0007		X						0.8302
TOM20	YGR082W	Component of the TOM (translocase of outer membrane) complex; responsible for recognition and initial import steps for all mitochondrially directed proteins; acts as a receptor for incoming precursor proteins	0.355087	0.0748047	0.287497			X		0	0	0.9481	X							0.9481
TOM22	YNL131W	Component of the TOM (Translocase of Outer Membrane) complex; responsible for initial import of mitochondrially directed proteins; mediates interaction between TOM and TIM complexes and acts as a receptor for precursor proteins	0.600325	0.121489	0.0845928			X		0	0	0.8887	X							0.8887
TOM40	YMR203W	Component of the TOM (translocase of outer membrane) complex; responsible for recognition and initial import steps for all mitochondrially directed proteins; constitutes the core element of the protein conducting pore; pre-Tom40p is phosphorylated by PKA, which impairs its import into mitochondria under non-respiratory conditions	0.265761	0.110589	0.410147			X		0	0	0.9634	X							0.9634
TOM5	YPR133W-A	Component of the TOM (translocase of outer membrane) complex; responsible for recognition and initial import of all mitochondrially directed proteins; involved in transfer of precursors from the Tom70p and Tom20p receptors to the Tom40p pore	0.496593	0.14	0.193795			X		0	0	0.9409	X							0.9409
TOM7	YNL070W	Component of the TOM (translocase of outer membrane) complex; responsible for recognition and initial import steps for all mitochondrially directed proteins; promotes assembly and stability of the TOM complex	0.541489	0.118362	0			X		0	0	0.9174	X							0.9174
TOM70	YNL121C	Component of the TOM (translocase of outer membrane) complex; involved in the recognition and initial import steps for all mitochondrially directed proteins; acts as a receptor for incoming precursor proteins; TOM70 has a paralog, TOM71, that arose from the whole genome duplication	0.57	0.151922	0.430375			X		0	0	0.9175	X							0.9175
TOM71	YHR117W	Mitochondrial outer membrane protein; probable minor component of the TOM (translocase of outer membrane) complex responsible for recognition and import of mitochondrially directed proteins; TOM71 has a paralog, TOM70, that arose from the whole genome duplication	0.41052	0.224177	0.493744			X		0	0	0.9652	X							0.9652
TPC1	YGR096W	Mitochondrial membrane transporter; mediates uptake of the essential cofactor thiamine pyrophosphate (ThPP) into mitochondria; expression appears to be regulated by carbon source; member of the mitochondrial carrier family	0.155987	0.05**	0			X		#N/A	#N/A	#N/A		X						#N/A
TPI1	YDR050C	Triose phosphate isomerase, abundant glycolytic enzyme; mRNA half-life is regulated by iron availability; transcription is controlled by activators Reb1p, Gcr1p, and Rap1p through binding sites in the 5' non-coding region; inhibition of Tpi1p activity by PEP (phosphoenolpyruvate) stimulates redox metabolism in respiring cells; E104D mutation in human TPI causes a rare autosomal disease	2.18512	3.47131	60.9068				X	0.0009	0.0628	0.0007								0.0628
TPM1	YNL079C	Major isoform of tropomyosin; binds to and stabilizes actin cables and filaments, which direct polarized cell growth and the distribution of several organelles; acetylated by the NatB complex and acetylated form binds actin most efficiently; TPM1 has a paralog, TPM2, that arose from the whole genome duplication	6.48352	20.00*	7.21295	X				#N/A	#N/A	#N/A				X				#N/A
TPO1	YLL028W	Polyamine transporter of the major facilitator superfamily; member of the 12-spanner drug:H(+) antiporter DHA1 family; recognizes spermine, putrescine, and spermidine; catalyzes uptake of polyamines at alkaline pH and excretion at acidic pH; during oxidative stress exports spermine, spermidine from the cell, which controls timing of expression of stress-responsive genes; phosphorylation enhances …	0.539842	0.11633	0			X		0	0	0.9171		X						0.9171
TPO3	YPR156C	Polyamine transporter of the major facilitator superfamily; member of the 12-spanner drug:H(+) antiporter DHA1 family; specific for spermine; localizes to the plasma membrane; TPO3 has a paralog, TPO2, that arose from the whole genome duplication	0.221735	0.285652	0.245896			X		0	0	0.9596		X						0.9596
TRM1	YDR120C	tRNA methyltransferase; two forms of protein are made by alternative translation starts; localizes to both nucleus and mitochondrion to produce modified base N2,N2-dimethylguanosine in tRNAs in both compartments; nuclear Trm1p is evenly distributed around inner membrane in WT, but mislocalizes as puncta near ER-nucleus junctions in spindle pole body (SPB) mutants; both Trm1p inner nuclear membran…	1.1984	2.9546	1.29773				X	0	0.1834	0.0654								0.1834
TRR1	YDR353W	Cytoplasmic thioredoxin reductase; key regulatory enzyme that determines the redox state of the thioredoxin system, which acts as a disulfide reductase system and protects cells against both oxidative and reductive stress; protein abundance increases in response to DNA replication stress; TRR1 has a paralog, TRR2, that arose from the whole genome duplication	3.23759	4.95635	6.41787				X	0.071	0.0922	0			X					0.0922
TRR2	YHR106W	Mitochondrial thioredoxin reductase; involved in protection against oxidative stress, required with Glr1p to maintain the redox state of Trx3p; contains active-site motif (CAVC) present in prokaryotic orthologs; binds NADPH and FAD; TRR2 has a paralog, TRR1, that arose from the whole genome duplication	8.64238	4.65139	1.49073				X	0.1586	0.0002	0								0.1586
TRX1	YLR043C	Cytoplasmic thioredoxin isoenzyme; part of thioredoxin system which protects cells against oxidative and reductive stress; forms LMA1 complex with Pbi2p; acts as a cofactor for Tsa1p; required for ER-Golgi transport and vacuole inheritance; with Trx2p, facilitates mitochondrial import of small Tims Tim9p, Tim10p, Tim13p by maintaining them in reduced form; abundance increases iunder DNA replicati…	2.07749	4.92061	17.5881				X	0.0101	0.3973	0.0004			X					0.3973
TRX2	YGR209C	Cytoplasmic thioredoxin isoenzyme; part of thioredoxin system which protects cells against oxidative and reductive stress; forms LMA1 complex with Pbi2p; acts as a cofactor for Tsa1p; required for ER-Golgi transport and vacuole inheritance; with Trx1p, facilitates mitochondrial import of small Tims Tim9p, Tim10p, Tim13p by maintaining them in reduced form; abundance increases under DNA replicatio…	1.84008	5.23218	21.8028				X	0.0065	0.5781	0.0007								0.5781
TRX3	YCR083W	Mitochondrial thioredoxin; highly conserved oxidoreductase required to maintain the redox homeostasis of the cell, forms the mitochondrial thioredoxin system with Trr2p, redox state is maintained by both Trr2p and Glr1p	8.62016	15.8004	0.7526	X				0.9813	0.004	0				X				0.9813
TRZ1	YKR079C	tRNA 3'-end processing endonuclease tRNase Z; also localized to mitochondria and interacts genetically with Rex2 exonuclease; homolog of the human candidate prostate cancer susceptibility gene ELAC2	2.61874	2.92315	0.415274				X	0.0003	0.008	0.0002								0.008
TSC10	YBR265W	3-ketosphinganine reductase; catalyzes the second step in phytosphingosine synthesis; essential for growth in the absence of exogenous dihydrosphingosine or phytosphingosine; localized to lipid droplets; member of short chain dehydrogenase/reductase protein family	0.291164	1.23655	0.329583			X		0	0.0024	0.9118	X							0.9118
TUF1	YOR187W	Mitochondrial translation elongation factor Tu; comprises both GTPase and guanine nucleotide exchange factor activities, while these activities are found in separate proteins in S. pombe and humans	4.99023	28.1181	0.332063	X				0.681	0.269	0				X				0.681
TUM1	YOR251C	Rhodanese domain sulfur transferase; accepts persulfite from Nfs1p and transfers it to Uba4p in the pathway for 2-thiolation of the wobble uridine base of tRNAs; also stimulates sulfur transfer by Nfs1p; may be mitochondrially localized	2.3251	6.45974	0.658875				X	0.0598	0.5911	0.0001								0.5911
UBP16	YPL072W	Deubiquitinating enzyme anchored to the outer mitochondrial membrane; probably not important for general mitochondrial functioning, but may perform a more specialized function at mitochondria	0.324715	0.455769	0.0783536			X		0	0	0.9661	X							0.9661
UBX2	YML013W	Bridging factor involved in ER-associated protein degradation (ERAD); bridges the cytosolic Cdc48p-Npl1p-Ufd1p ATPase complex and the membrane associated Ssm4p and Hrd1p ubiquitin ligase complexes; contains a UBX (ubiquitin regulatory X) domain and a ubiquitin-associated (UBA) domain; redistributes from the ER to lipid droplets during the diauxic shift and stationary phase; required for the maint…	0.184839	0.321085	0.47267			X		0	0	0.9365	X							0.9365
UGO1	YDR470C	Outer membrane component of the mitochondrial fusion machinery; binds directly to Fzo1p and Mgm1p and thus links these two GTPases during mitochondrial fusion; involved in fusion of both the outer and inner membranes; facilitates dimerization of Fzo1p during fusion; import into the outer membrane is mediated by Tom70p and Mim1p; has similarity to carrier proteins but is not likely to function as …	0.264886	0.128354	0.0968973			X		0	0	0.9658	X							0.9658
UIP4	YPL186C	Protein that interacts with Ulp1p; a Ubl (ubiquitin-like protein)-specific protease for Smt3p protein conjugates; detected in a phosphorylated state in the mitochondrial outer membrane; also detected in ER and nuclear envelope	1.18457	0.191118	8.16705			X		0	0	0.2265	X							0.2265
UPS3	YDR185C	Mitochondrial protein of unknown function; similar to Ups1p and Ups2p which are involved in regulation of mitochondrial cardiolipin and phosphatidylethanolamine levels; null is viable but interacts synthetically with ups1 and ups2 mutations; UPS3 has a paralog, UPS2, that arose from the whole genome duplication	0.378548	3.57369	0		X			0	0.6378	0.2402		X						0.6378
USB1	YLR132C	Putative phosphodiesterase specific for U6 snRNA 3' end modification; trims the 3' poly(u) tract to leave a terminal 3' phosphate; human homolog, hUSB1 (aka C16orf57) produces a 2',3' cyclic phosphate; mutations in hUSB1 are associated with a rare skin condition (OMIM 604173); essential protein that localizes to the nucleus and mitochondria; overexpression suppresses the respiratory defects of ox…	0.70399	2.2276	0.377522				X	0	0.0722	0.575								0.575
UTH1	YKR042W	Mitochondrial inner membrane protein; role in mitophagy is disputed; implicated in cell wall biogenesis, the oxidative stress response, life span during starvation, and cell death; SUN family member; UTH1 has a paralog, NCA3, that arose from the whole genome duplication	3.56616	6.68807	##				X	0.3893	0.1686	0								0.3893
VAC8	YEL013W	Phosphorylated and palmitoylated vacuolar membrane protein; interacts with Atg13p, required for the cytoplasm-to-vacuole targeting (Cvt) pathway; interacts with Nvj1p to form nucleus-vacuole junctions	2.96431	0.29006	30.2042				X	0	0	0.0001								0.0001
VAR1	Q0140	Mitochondrial ribosomal protein of the small subunit; mitochondrially-encoded; polymorphic in different strains due to variation in number of AAT (asparagine) codons; translated near the mitochondrial inner membrane; may have a role in loss of mitochondrial DNA under stress conditions	0.627858	11.6304	0.115354		X			0	0.9705	0.0018		X						0.9705
VAS1	YGR094W	Mitochondrial and cytoplasmic valyl-tRNA synthetase	1.73394	5.45819	1.80391				X	0.0053	0.6683	0.0008								0.6683
VPS1	YKR001C	Dynamin-like GTPase required for vacuolar sorting; also involved in actin cytoskeleton organization, endocytosis, late Golgi-retention of some proteins, regulation of peroxisome biogenesis	0.354168	6.62859	5.55544		X			0	0.9286	0.0222	X							0.9286
VPS13	YLL040C	Protein involved in prospore membrane morphogenesis; heterooligomeric or homooligomeric complex; peripherally associated with membranes; involved in sporulation, vacuolar protein sorting, prospore membrane formation during sporulatoin, and protein-Golgi retention; homologous to human CHAC and COH1 which are involved in chorea acanthocytosis and Cohen syndrome, respectively	0.569682	2.76211	35.7136				X	0	0.2678	0.4946								0.4946
VPS21	YOR089C	Endosomal Rab family GTPase; required for endocytic transport and sorting of vacuolar hydrolases; required for endosomal localization of the CORVET complex; required with YPT52 for MVB biogenesis and sorting; involved in autophagy and ionic stress tolerance; geranylgeranylation required for membrane association; protein abundance increases in response to DNA replication stress; mammalian Rab5 hom…	0.462876	0.05*	2.2082			X		#N/A	#N/A	#N/A	X							#N/A
WBP1	YEL002C	Beta subunit of the oligosaccharyl transferase glycoprotein complex; required for N-linked glycosylation of proteins in the endoplasmic reticulum	0.317038	0.49724	3.09931			X		0	0	0.9644	X							0.9644
WWM1	YFL010C	WW domain containing protein of unknown function; binds to Mca1p, a caspase-related protease that regulates H2O2-induced apoptosis; overexpression causes G1 phase growth arrest and clonal death that is suppressed by overexpression of MCA1	8.57491	7.05567	6.92123	X				0.8079	0.001	0				X				0.8079
XDJ1	YLR090W	Chaperone with a role in facilitating mitochondrial protein import; ascomycete-specific member of the DnaJ-like family, closely related to Ydj1p; predicted to be C-terminally prenylated; the authentic, non-tagged protein is detected in highly purified mitochondria in high-throughput studies	0.523912	9.62729	0		X			0	0.9647	0.0045		X						0.9647
YAH1	YPL252C	Ferredoxin of the mitochondrial matrix; required for formation of cellular iron-sulfur proteins; involved in heme A biosynthesis; homologous to human adrenodoxin	23.746	20.00*	0	X				#N/A	#N/A	#N/A				X				#N/A
YAL044W-A	YAL044W-A	Putative protein of unknown function; similar to S. pombe uvi31 which is a putative DNA repair protein	8.75732	10.6123	0	X				0.9656	0.0015	0				X				0.9656
YBL029C-A	YBL029C-A	Protein of unknown function; green fluorescent protein (GFP)-fusion protein localizes to the cell periphery; protein abundance increases in response to DNA replication stress; has potential orthologs in Saccharomyces species and in Yarrowia lipolytica	0.166996	0.170341	3.38107			X		0	0	0.9256		X						0.9256
YBL059W	YBL059W	Putative protein of unknown function; the authentic, non-tagged protein is detected in highly purified mitochondria in high-throughput studies; YBL059W has a paralog, YER093C-A, that arose from the whole genome duplication	0.2458	0.332459	0.0288385			X		0	0	0.964		X						0.964
YBL095W	YBL095W	Putative protein of unknown function; likely functions in cristae junction formation; the authentic, non-tagged protein is detected in highly purified mitochondria in high-throughput studies	0.178102	3.69712	0		X			0	0.7347	0.0753		X						0.7347
YBR016W	YBR016W	Tail-anchored plasma membrane protein with a conserved CYSTM module; predicted to be palmitoylated; has similarity to hydrophilins, which are involved in the adaptive response to hyperosmotic conditions; YBR016W has a paralog, YDL012C, that arose from the whole genome duplication	0.170718	0.265333	2.59215			X		0	0	0.9257		X						0.9257
YBR056W	YBR056W	Putative glycoside hydrolase of the mitochondrial intermembrane space	2.71393	4.3958	112.124				X	0.0162	0.1038	0.0001			X					0.1038
YBR255C-A	YBR255C-A	Putative protein of unknown function; may interact with respiratory chain complexes III (ubiquinol-cytochrome c reductase) or IV (cytochrome c oxidase); identified by sequence comparison with hemiascomycetous yeast species	0.190201	0.44969	0.344737			X		0	0	0.9294		X						0.9294
YCK1	YHR135C	Palmitoylated plasma membrane-bound casein kinase I (CK1) isoform; shares redundant functions with Yck2p in morphogenesis, proper septin assembly, endocytic trafficking, and glucose sensing; stabilized by Sod1p binding in the presence of glucose and oxygen, causing glucose repression of respiratory metabolism; YCK1 has a paralog, YCK2, that arose from the whole genome duplication	0.327655	0.301306	0.503362			X		0	0	0.9705		X						0.9705
YCK2	YNL154C	Palmitoylated plasma membrane-bound casein kinase I (CK1) isoform; shares redundant functions with Yck1p in morphogenesis, proper septin assembly, endocytic trafficking, and glucose sensing; stabilized by Sod1p binding in the presence of glucose and oxygen, causing glucose repression of respiratory metabolism; YCK2 has a paralog, YCK1, that arose from the whole genome duplication	0.645025	0.685601	0.450809			X		0	0	0.8802		X						0.8802
YCP4	YCR004C	Protein of unknown function; has sequence and structural similarity to flavodoxins; predicted to be palmitoylated; the authentic, non-tagged protein is detected in highly purified mitochondria in high-throughput studies	0.494946	1.00492	3.5699			X		0	0.0001	0.9157		X						0.9157
YDL012C	YDL012C	Tail-anchored plasma membrane protein with a conserved CYSTM module; possibly involved in response to stress; may contribute to non-homologous end-joining (NHEJ) based on ydl012c htz1 double null phenotype; YDL012C has a paralog, YBR016W, that arose from the whole genome duplication	0.241996	0.28276	0			X		0	0	0.9649		X						0.9649
YDL027C	YDL027C	Putative protein of unknown function; the authentic, non-tagged protein is detected in highly purified mitochondria in high-throughput studies; YDL027C is not an essential gene	0.164475	0.10475	0.286396			X		0	0	0.9149		X						0.9149
YDL119C	YDL119C	Putative mitochondrial transport protein; GFP-fusion protein is induced in response to the DNA-damaging agent MMS; the authentic, non-tagged protein is detected in purified mitochondria	0.200412	0.269402	0			X		0	0	0.9511		X						0.9511
YDL124W	YDL124W	NADPH-dependent alpha-keto amide reductase; reduces aromatic alpha-keto amides, aliphatic alpha-keto esters, and aromatic alpha-keto esters; member of the aldo-keto reductase (AKR) family; protein abundance increases in response to DNA replication stress	2.21491	3.1598	39.3707				X	0.0004	0.0318	0.0007								0.0318
YDL157C	YDL157C	Putative protein of unknown function; the authentic, non-tagged protein is detected in highly purified mitochondria in high-throughput studies	16.5724	0.251146	0				X	0	0	0								0
YDL183C	YDL183C	Protein that may form an active mitochondrial KHE system; mitochondrial inner-membrane protein; non-essential gene; KHE system stands for K+/H+ exchanger system	0.270682	2.27314	0.419469			X		0	0.1794	0.6436		X						0.6436
YDL218W	YDL218W	Putative protein of unknown function; YDL218W transcription is regulated by Azf1p and induced by starvation and aerobic conditions; expression also induced in cells treated with the mycotoxin patulin	0.20796	0.08908	##			X		0	0	0.9458		X						0.9458
YDR061W	YDR061W	Protein with similarity to ABC transporter family members; lacks predicted membrane-spanning regions; transcriptionally activated by Yrm1p along with genes involved in multidrug resistance	1.61599	6.0992	0.205074		X			0.0046	0.7973	0.0007		X						0.7973
YDR115W	YDR115W	Putative mitochondrial ribosomal protein of the large subunit; similar to E. coli L34 ribosomal protein; required for respiratory growth, as are most mitochondrial ribosomal proteins; protein increases in abundance and relocalizes to the plasma membrane upon DNA replication stress	1.86038	0.176852	0.302804				X	0	0	0.0067								0.0067
YDR282C	YDR282C	Mitochondrial inner membrane protein of unknown function; localizes to the inner membrane with the C terminus facing the intermembrane space; ortholog of human RMND1, mutation in which is implicated in infantile encephaloneuromyopathy and defective mitochondrial translation	0.301005	0.802286	0.223266			X		0	0	0.9477		X						0.9477
YDR286C	YDR286C	Putative protein of unknown function; predicted to have thiol-disulfide oxidoreductase active site	5.3881	5.19012	0				X	0.2593	0.0077	0								0.2593
YDR381C-A	YDR381C-A	Protein of unknown function; localized to the mitochondrial outer membrane	0.329533	0.143664	0.421292			X		0	0	0.968	X							0.968
YEA6	YEL006W	Putative mitochondrial NAD+ transporter; member of the mitochondrial carrier subfamily (see also YIA6); has putative human ortholog; YEA6 has a paralog, YIA6, that arose from the whole genome duplication	0.231	0.2924	0			X		0	0	0.9621		X						0.9621
YER077C	YER077C	Putative protein of unknown function; green fluorescent protein (GFP)-fusion protein localizes to the mitochondrion; null mutation results in a decrease in plasma membrane electron transport	0.21338	7.11148	0		X			0	0.8841	0.014		X						0.8841
YET1	YKL065C	Endoplasmic reticulum transmembrane protein; may interact with ribosomes, based on co-purification experiments; homolog of human BAP31 protein; YET1 has a paralog, YET2, that arose from the whole genome duplication	0.285197	0.21598	2.70486			X		0	0	0.9706		X						0.9706
YET3	YDL072C	Protein of unknown function; YET3 null mutant decreases the level of secreted invertase; homolog of human BAP31 protein; protein abundance increases in response to DNA replication stress	0.3968	0.233427	2.25405			X		0	0	0.9669	X							0.9669
YFH1	YDL120W	Mitochondrial matrix iron chaperone; oxidizes and stores iron; interacts with Isu1p to promote Fe-S cluster assembly; mutation results in multiple Fe/S-dependent enzyme deficiencies; human frataxin homolog is mutated in Friedrich's ataxia	15.3519	11.8141	0.0675242	X				0.9686	0.0001	0				X				0.9686
YFR045W	YFR045W	Putative mitochondrial transport protein; null mutant is viable, exhibits decreased levels of chitin and normal resistance to calcofluor white	0.11853	0.0732729	0			X		0	0	0.7197		X						0.7197
YGL024W	YGL024W	Dubious open reading frame; unlikely to encode a functional protein, based on available experimental and comparative sequence data; partially/completely overlaps the verified ORF PGD1/YGL025C	2.46211	23.1144	##		X			0.0885	0.8673	0		X						0.8673
YGL041W-A	YGL041W-A	Putative protein of unknown function; conserved in fungi; identified by expression profiling and mass spectrometry	4.94868	10.1693	0.450809	X				0.8908	0.0425	0				X				0.8908
YGR012W	YGR012W	Putative cysteine synthase; localized to the mitochondrial outer membrane	0.323143	1.36821	0.146675			X		0	0.0043	0.9054	X							0.9054
YGR021W	YGR021W	Putative protein of unknown function; the authentic, non-tagged protein is detected in highly purified mitochondria in high-throughput studies	5.55633	12.5186	0.244279	X				0.9399	0.0278	0				X				0.9399
YGR053C	YGR053C	Putative protein of unknown function	2.77922	10.9494	0	X				0.3009	0.6051	0				X				0.6051
YGR130C	YGR130C	Component of the eisosome with unknown function; GFP-fusion protein localizes to the cytoplasm; specifically phosphorylated in vitro by mammalian diphosphoinositol pentakisphosphate (IP7)	4.76911	4.7497	42.8913				X	0.1242	0.0098	0								0.1242
YGR266W	YGR266W	Protein of unknown function; predicted to contain a single transmembrane domain; mutant has increased aneuploidy tolerance; localized to both the mitochondrial outer membrane and the plasma membrane; protein abundance increases in response to DNA replication stress	2.74548	5.73209	1.60751				X	0.0889	0.3088	0	X							0.3088
YHB1	YGR234W	Nitric oxide oxidoreductase; flavohemoglobin involved in nitric oxide detoxification; plays a role in the oxidative and nitrosative stress responses; protein increases in abundance and relocalizes from nucleus to cytoplasmic foci upon DNA replication stress	4.18627	25.5078	0.298057	X				0.5594	0.3913	0				X				0.5594
YHL018W	YHL018W	Putative 4a-hydroxytetrahydrobiopterin dehydratase; green fluorescent protein (GFP)-fusion protein localizes to mitochondria and is induced in response to the DNA-damaging agent MMS	8.39503	3.17002	0.369132				X	0.0039	0	0								0.0039
YHM2	YMR241W	Citrate and oxoglutarate carrier protein; exports citrate from and imports oxoglutarate into the mitochondrion, causing net export of NADPH reducing equivalents; also associates with mt nucleoids and has a role in replication and segregation of the mt genome	0.176185	0.115168	0.257705			X		0	0	0.9314		X						0.9314
YHR097C	YHR097C	Putative protein of unknown function; green fluorescent protein (GFP)-fusion protein localizes to the cytoplasm and the nucleus; YHR097C has a paralog, PAL1, that arose from the whole genome duplication	2.52807	4.39436	7.47055				X	0.0123	0.1369	0.0001								0.1369
YHR138C	YHR138C	Protein of unknown function; similar to Pbi2p; double null mutant lacking Pbi2p and Yhr138cp exhibits highly fragmented vacuoles; protein abundance increases in response to DNA replication stress	6.94911	20.00**	41.9253	X				#N/A	#N/A	#N/A				X				#N/A
YIA6	YIL006W	Mitochondrial NAD+ transporter; involved in the transport of NAD+ into the mitochondria (see also YEA6); member of the mitochondrial carrier subfamily; disputed role as a pyruvate transporter; has putative mouse and human orthologs; YIA6 has a paralog, YEA6, that arose from the whole genome duplication	0.275371	0.51551	0			X		0	0	0.9606		X						0.9606
YIL077C	YIL077C	Putative protein of unknown function; the authentic, non-tagged protein is detected in highly purified mitochondria in high-throughput studies; deletion confers sensitivity to 4-(N-(S-glutathionylacetyl)amino) phenylarsenoxide (GSAO)	0.211522	0.153839	0.207637			X		0	0	0.9573		X						0.9573
YIL108W	YIL108W	Putative metalloendopeptidase; forms cytoplasmic foci upon DNA replication stress	0.537104	4.06334	0.858684		X			0	0.753	0.1307		X						0.753
YIL156W-B	YIL156W-B	Putative protein of unknown function; originally identified based on homology to <i>Ashbya gossypii</i> and other related yeasts	0.597674	6.92473	0.110402		X			0	0.9499	0.0108		X						0.9499
YIM1	YMR152W	Protein of unknown function; null mutant displays sensitivity to DNA damaging agents; may have a role in lipid metabolism, based on localization to lipid droplets; the authentic, non-tagged protein is detected in highly purified mitochondria in high-throughput studies; protein abundance increases in response to DNA replication stress	1.38128	10.875	0.412329		X			0.004	0.9598	0.0001	X							0.9598
YJL045W	YJL045W	Minor succinate dehydrogenase isozyme; participates in oxidation of succinate and transfer of electrons to ubiquinone; induced during the diauxic shift in a Cat8p-dependent manner; YJL045W has a paralog, SDH1, that arose from the whole genome duplication	2.51734	11.2207	0.652263		X			0.1882	0.7302	0		X						0.7302
YJL133C-A	YJL133C-A	Putative protein of unknown function; the authentic, non-tagged protein is detected in highly purified mitochondria in high-throughput studies	10.2769	18.6165	0	X				0.9841	0.0026	0				X				0.9841
YJL147C	YJL147C	Mitochondrial protein of unknown function; homozygous diploid deletion strain has a sporulation defect characterized by elevated dityrosine in the soluble fraction; expression induced by calcium shortage; YJL147W is a non-essential gene	0.384825	12.3779	0		X			0	0.9427	0.0042		X						0.9427
YJL171C	YJL171C	GPI-anchored cell wall protein of unknown function; induced in response to cell wall damaging agents and by mutations in genes involved in cell wall biogenesis; sequence similarity to YBR162C/TOS1, a covalently bound cell wall protein; protein abundance increases in response to DNA replication stress	0.286737	0.0779777	0.911577			X		0	0	0.955		X						0.955
YJR003C	YJR003C	Putative protein of unknown function; detected in highly purified mitochondria in high-throughput studies; predicted to be involved in ribosome biogenesis	0.929024	4.89114	0.185944		X			0	0.84	0.0195		X						0.84
YJR039W	YJR039W	Putative protein of unknown function; the authentic, non-tagged protein is detected in highly purified mitochondria in high-throughput studies	16.994	--	##	X				#N/A	#N/A	#N/A				X				#N/A
YJR085C	YJR085C	Protein of unknown function; GFP-fusion protein is induced in response to the DNA-damaging agent MMS; the authentic, non-tagged protein is detected in highly purified mitochondria in high-throughput studies; protein abundance increases in response to DNA replication stress	0.465699	0.26547	0			X		0	0	0.9578	X							0.9578
YJR096W	YJR096W	Xylose and arabinose reductase; member of the aldo-keto reductase (AKR) family; GFP-fusion protein is induced in response to the DNA-damaging agent MMS	3.57903	5.63487	4.9589				X	0.2024	0.1027	0								0.2024
YJR111C	YJR111C	Putative protein of unknown function; green fluorescent protein (GFP)-fusion protein localizes to the mitochondria	4.00543	5.37882	0.346062				X	0.2041	0.0486	0								0.2041
YJU3	YKL094W	Monoglyceride lipase (MGL); functional ortholog of mammalian MGL, localizes to lipid particles and membranes, also member of the eukaryotic serine hydrolase family	0.619493	7.10847	1.4726		X			0	0.9529	0.0091	X							0.9529
YKL023C-A	YKL023C-A	Putative protein of unknown function	1.17423	6.45402	0		X			0.0005	0.9086	0.0021		X						0.9086
YKL065W-A	YKL065W-A	Putative protein of unknown function	0.596413	4.90754	6.08593		X			0	0.8712	0.049		X						0.8712
YKL107W	YKL107W	Putative short-chain dehydrogenase/reductase; proposed to be a palmitoylated membrane protein	0.80078	3.89423	##		X			0	0.688	0.0894		X						0.688
YKL133C	YKL133C	Putative protein of unknown function; not required for growth of cells lacking the mitochondrial genome (null mutation does not confer a petite-negative phenotype); YKL133C has a paralog, MGR3, that arose from the whole genome duplication	0.324966	0.132731	0			X		0	0	0.9671		X						0.9671
YKL151C	YKL151C	NADHX dehydratase; converts (S)-NADHX to NADH in an ATP-dependent manner; homologous to Carkd in mammals, and the C-terminal domain of YjeF in E.coli; enzyme is widespread in eukaryotes, prokaryotes and archaea; YKL151C promoter contains STREs (stress response elements) and expression is induced by heat shock or methyl methanesulfonate; green fluorescent protein (GFP)-fusion protein localizes to …	10.6567	11.3589	4.1775	X				0.9729	0.0006	0				X				0.9729
YKL162C	YKL162C	Putative protein of unknown function; green fluorescent protein (GFP)-fusion protein localizes to the mitochondrion	0.306548	8.401	0		X			0	0.9324	0.0114		X						0.9324
YKR070W	YKR070W	Putative protein of unknown function; the authentic, non-tagged protein is detected in highly purified mitochondria in high-throughput studies	2.20742	7.2101	0.232864				X	0.0576	0.7167	0								0.7167
YKT6	YKL196C	Vesicle membrane protein (v-SNARE) with acyltransferase activity; involved in trafficking to and within the Golgi, endocytic trafficking to the vacuole, and vacuolar fusion; membrane localization due to prenylation at the carboxy-terminus	0.429074	1.178	37.3747			X		0	0.0007	0.9178		X						0.9178
YLF2	YHL014C	Protein of unknown function; has weak similarity to E. coli GTP-binding protein gtp1; the authentic, non-tagged protein is detected in highly purified mitochondria in high-throughput studies	0.832753	8.68203	0.0741561		X			0.0001	0.9662	0.0019		X						0.9662
YLH47	YPR125W	Mitochondrial inner membrane protein; exposed to the mitochondrial matrix; associates with mitochondrial ribosomes; NOT required for respiratory growth; homolog of human Letm1, a protein implicated in Wolf-Hirschhorn syndrome	0.256121	0.666862	0.181116			X		0	0	0.9479		X						0.9479
YLR118C	YLR118C	Acyl-protein thioesterase responsible for depalmitoylation of Gpa1p; green fluorescent protein (GFP)-fusion protein localizes to both the cytoplasm and nucleus and is induced in response to the DNA-damaging agent MMS	0.676114	9.8715	0.396712		X			0	0.9703	0.0023		X						0.9703
YLR281C	YLR281C	Putative protein of unknown function; green fluorescent protein (GFP)-fusion protein localizes to mitochondria; YLR281C is not an essential gene	3.61517	9.13777	0.173031	X				0.6318	0.2195	0				X				0.6318
YLR283W	YLR283W	Putative protein of unknown function; green fluorescent protein (GFP)-fusion protein localizes to mitochondria; YLR283W is not an essential gene	0.618678	0.0969971	0			X		0	0	0.8544		X						0.8544
YLR290C	YLR290C	Putative protein of unknown function; the authentic, non-tagged protein is detected in highly purified mitochondria in high-throughput studies; YLR290C is not an essential gene	1.60224	7.9132	0.1582		X			0.0078	0.9034	0.0002		X						0.9034
YLR361C-A	YLR361C-A	Putative protein of unknown function	0.710911	9.5672	1.57783		X			0	0.9701	0.0022		X						0.9701
YMC1	YPR058W	Putative mitochondrial inner membrane transporter; proposed role in oleate metabolism and glutamate biosynthesis; member of the mitochondrial carrier (MCF) family; localizes to vacuole in response to H2O2; YMC1 has a paralog, YMC2, that arose from the whole genome duplication	0.172319	0.216005	0.284611			X		0	0	0.931		X						0.931
YMC2	YBR104W	Putative mitochondrial inner membrane transporter; proposed role in oleate metabolism and glutamate biosynthesis; member of the mitochondrial carrier (MCF) family; YMC2 has a paralog, YMC1, that arose from the whole genome duplication	0.230536	0.238203	0			X		0	0	0.9635		X						0.9635
YME1	YPR024W	Catalytic subunit of the i-AAA protease complex; complex is located in the mitochondrial inner membrane; responsible for degradation of unfolded or misfolded mitochondrial gene products; serves as a nonconventional translocation motor to pull PNPase into the intermembrane space; also has a role in intermembrane space protein folding; mutation causes an elevated rate of mitochondrial turnover	0.328665	0.227547	0.213259			X		0	0	0.9711		X						0.9711
YME2	YMR302C	Integral inner mitochondrial membrane protein; role in maintaining mitochondrial nucleoid structure and number; mutants exhibit an increased rate of mitochondrial DNA escape; shows some sequence similarity to exonucleases	0.251699	0.243488	0.466542			X		0	0	0.9674		X						0.9674
YML6	YML025C	Mitochondrial ribosomal protein of the large subunit; has similarity to E. coli L4 ribosomal protein and human mitoribosomal MRP-L4 protein; essential for viability, unlike most other mitoribosomal proteins	2.34642	26.0535	0.199042		X			0.0538	0.899	0		X						0.899
YMR099C	YMR099C	Glucose-6-phosphate 1-epimerase (hexose-6-phosphate mutarotase); likely involved in carbohydrate metabolism; GFP-fusion protein localizes to both the nucleus and cytoplasm and is induced in response to the DNA-damaging agent MMS	0.57658	0.51288	51.8431			X		0	0	0.9232		X						0.9232
YMR166C	YMR166C	Predicted transporter of the mitochondrial inner membrane; has similarity to human mitochondrial ATP-Mg/Pi carriers; YMR166C is not an essential gene	0.193386	0.10657	0			X		0	0	0.9432		X						0.9432
YMR209C	YMR209C	Putative S-adenosylmethionine-dependent methyltransferase; YMR209C is not an essential gene	0.48667	3.4934	0.601079		X			0	0.5944	0.2591		X						0.5944
YMR295C	YMR295C	Protein of unknown function that associates with ribosomes; green fluorescent protein (GFP)-fusion protein localizes to the cell periphery and bud; not an essential gene; protein abundance increases in response to DNA replication stress; YMR295C has a paralog, YGR273C, that arose from the whole genome duplication	1.32986	6.29326	3.30593		X			0.0012	0.8773	0.0014		X						0.8773
YMR31	YFR049W	Subunit of the mitochondrial alpha-ketoglutarate dehydrogenase; recruits E3 subunit (Lpd1p) to the E1-E2 (Kgd1p, Kgd2p) core; has similarity to human mitochondrial ribosomal protein MRP-S36	7.2768	24.3735	0.258155	X				0.9422	0.0352	0				X				0.9422
YNK1	YKL067W	Nucleoside diphosphate kinase; catalyzes the transfer of gamma phosphates from nucleoside triphosphates, usually ATP, to nucleoside diphosphates by a mechanism that involves formation of an autophosphorylated enzyme intermediate; protein abundance increases in response to DNA replication stress	11.4742	11.8367	7.42879	X				0.9754	0.0004	0			X					0.9754
YNL122C	YNL122C	Putative protein of unknown function; green fluorescent protein (GFP)-fusion protein localizes to mitochondria; YNL122C is not an essential gene	--	0.213985	0			X		#N/A	#N/A	#N/A		X						#N/A
YNL134C	YNL134C	Protein of unknown function; similar to dehydrogenases from other model organisms; green fluorescent protein (GFP)-fusion protein localizes to both the cytoplasm and nucleus; protein abundance increases in response to DNA replication stress	2.19765	0.58024	27.1774				X	0	0	0.0023								0.0023
YNL194C	YNL194C	Integral membrane protein; required for sporulation and plasma membrane sphingolipid content; similar to SUR7; GFP-fusion protein is induced in response to the DNA-damaging agent MMS; GFP-fusion protein is more abundant at MCCs (membrane compartment occupied by Can1) in the presence of glycerol and oleate; YNL194C has a paralog, FMP45, that arose from the whole genome duplication	1.34374	0.581671	14.1254			X		0	0	0.1359		X						0.1359
YNL200C	YNL200C	NADHX epimerase; catalyzes isomerization of (R)- and (S)-NADHX; homologous to AIBP in mammals and the N- terminal domain of YjeF in E.coli; enzyme is widespread in eukaryotes, prokaryotes and archaea; the authentic, non-tagged protein is detected in highly purified mitochondria in high-throughput studies	9.81929	5.89288	2.76849	X				0.5532	0.0003	0				X				0.5532
YNL208W	YNL208W	Protein of unknown function; may interact with ribosomes, based on co-purification experiments; authentic, non-tagged protein is detected in purified mitochondria in high-throughput studies; potential orthologs found in other fungi	4.41482	8.7923	2.91681	X				0.7946	0.0738	0				X				0.7946
YNL211C	YNL211C	Putative protein of unknown function; green fluorescent protein (GFP)-fusion protein localizes to mitochondria; YNL211C is not an essential gene	--	0.15573	0			X		#N/A	#N/A	#N/A		X						#N/A
YNL247W	YNL247W	Cysteinyl-tRNA synthetase; may interact with ribosomes, based on co-purification experiments	3.52618	2.81446	1.48919				X	0.0004	0.0011	0								0.0011
YNR021W	YNR021W	Putative protein of unknown function; green fluorescent protein (GFP)-fusion protein localizes to the endoplasmic reticulum; YNR021W is not an essential gene	0.363554	0.19929	9.24159			X		0	0	0.969	X							0.969
YNR034W-A	YNR034W-A	Putative protein of unknown function; expression is regulated by Msn2p/Msn4p; YNR034W-A has a paralog, YCR075W-A, that arose from the whole genome duplication	2.92535	8.20971	73.9327	X				0.3111	0.4662	0				X				0.4662
YNR040W	YNR040W	Putative protein of unknown function; the authentic, non-tagged protein is detected in highly purified mitochondria in high-throughput studies	0.275458	0.361797	0.0485701			X		0	0	0.9671		X						0.9671
YOL114C	YOL114C	Putative protein of unknown function with similarity to human ICT1; has prokaryotic factors that may function in translation termination; YOL114C is not an essential gene	1.81645	1.93407	0				X	0	0.0018	0.0073								0.0073
YOP1	YPR028W	Membrane protein that interacts with Yip1p to mediate membrane traffic; interacts with Sey1p to maintain ER morphology; overexpression leads to cell death and accumulation of internal cell membranes; mutants have reduced phosphatidylserine transfer between the ER and mitochondria; forms ER foci upon DNA replication stress	0.279369	0.595433	1.65297			X		0	0	0.957	X							0.957
YOR020W-A	YOR020W-A	Putative protein of unknown function; conserved in A. gossypii; the authentic, non-tagged protein is detected in highly purified mitochondria in high-throughput studies	0.470157	10.0875	2.03023		X			0	0.9612	0.0048		X						0.9612
YOR022C	YOR022C	Putative carboxylic ester hydrolase; similar to bovine phospholipase A1; the authentic, non-tagged protein is detected in highly purified mitochondria in high-throughput studies	1.39267	5.7943	0.373527		X			0.0013	0.826	0.0018		X						0.826
YOR1	YGR281W	Plasma membrane ATP-binding cassette (ABC) transporter; multidrug transporter mediates export of many different organic anions including oligomycin; homolog of human cystic fibrosis transmembrane receptor (CFTR)	1.03312	0.19588	0.412168		X			0	0	0.4256		X						0.4256
YOR131C	YOR131C	Putative haloacid dehalogenase-like hydrolase; non-essential gene; overexpression causes a cell cycle delay or arrest; protein abundance increases in response to DNA replication stress	0.646592	17.5912	0		X			0	0.9584	0.0007		X						0.9584
YOR289W	YOR289W	Putative protein of unknown function; transcription induced by the unfolded protein response; green fluorescent protein (GFP)-fusion protein localizes to both the cytoplasm and the nucleus	1.13297	8.0468	1.80324		X			0.0006	0.9504	0.0009		X						0.9504
YPL107W	YPL107W	Putative protein of unknown function; green fluorescent protein (GFP)-fusion protein localizes to mitochondria; YPL107W is not an essential gene	7.80073	7.24688	0.329583	X				0.827	0.0018	0				X				0.827
YPL109C	YPL109C	Putative protein of unknown function; the authentic, non-tagged protein is detected in highly purified mitochondria in high-throughput studies	0.23209	0.249274	0.0876105			X		0	0	0.9636		X						0.9636
YPL168W	YPL168W	Putative protein of unknown function; green fluorescent protein (GFP)-fusion protein localizes to the mitochondrion; expression may be cell cycle-regulated	0.282379	0.390937	0			X		0	0	0.9667		X						0.9667
YPL199C	YPL199C	Putative protein of unknown function; predicted to be palmitoylated	0.326722	0.477802	0.705615			X		0	0	0.9653		X						0.9653
YPR010C-A	YPR010C-A	Putative protein of unknown function; conserved among Saccharomyces sensu stricto species	0.75231	22.247	0.198662		X			0.0001	0.9459	0.0003		X						0.9459
YPR011C	YPR011C	Mitochondrial transporter; major substrates are adenosine 5'-phosphosulfate (APS) and 3'-phospho-adenosine 5'-phosphosulfate (PAPS); member of the mitochondrial carrier family; the authentic, non-tagged protein is detected in highly purified mitochondria in high-throughput studies	0.218215	0.329836	0			X		0	0	0.9563		X						0.9563
YPR098C	YPR098C	Protein of unknown function; localized to the mitochondrial outer membrane	0.214666	0.112664	0.387589			X		0	0	0.9543	X							0.9543
YPS1	YLR120C	Aspartic protease; member of the yapsin family of proteases involved in cell wall growth and maintenance; attached to the plasma membrane via a glycosylphosphatidylinositol (GPI) anchor; YPS1 has a paralog, MKC7, that arose from the whole genome duplication	6.82766	12.3069	1.26227	X				0.966	0.0083	0				X				0.966
YPT1	YFL038C	Rab family GTPase; involved in the ER-to-Golgi step of the secretory pathway; complex formation with the Rab escort protein Mrs6p is required for prenylation of Ypt1p by protein geranylgeranyltransferase type II (Bet2p-Bet4p); binds to unspliced HAC1 mRNA; regulates unfolded protein response (UPR) by promoting the decay of HAC1 RNA	0.234641	0.184737	5.05063			X		0	0	0.9646	X							0.9646
YPT31	YER031C	Rab family GTPase; involved in the exocytic pathway; mediates intra-Golgi traffic or the budding of post-Golgi vesicles from the trans-Golgi; YPT31 has a paralog, YPT32, that arose from the whole genome duplication	0.286058	0.242394	1.38425			X		0	0	0.9706	X							0.9706
YPT32	YGL210W	Rab family GTPase involved in the exocytic pathway; mediates intra-Golgi traffic or the budding of post-Golgi vesicles from the trans-Golgi; protein abundance increases in response to DNA replication stress; YPT32 has a paralog, YPT31, that arose from the whole genome duplication	0.165988	0.122253	1.12671			X		0	0	0.9209	X							0.9209
YPT52	YKR014C	Endosomal Rab family GTPase; required for vacuolar protein sorting, endocytosis and multivesicular body (MVB) biogenesis and sorting; required for localization of the CORVET complex to endosomes; involved in autophagy and ionic stress tolerance; similar to Vps21p and Ypt53p; mammalian Rab5 homolog; protein abundance increases in response to DNA replication stress	0.306353	0.31978	2.10378			X		0	0	0.9701	X							0.9701
YPT7	YML001W	Rab family GTPase; GTP-binding protein of the rab family; required for homotypic fusion event in vacuole inheritance, for endosome-endosome fusion; interacts with the cargo selection/retromer complex for retrograde sorting; similar to mammalian Rab7	0.28216	0.342676	3.49704			X		0	0	0.9683	X							0.9683
YRO2	YBR054W	Protein with a putative role in response to acid stress; null mutant is sensitive to acetic acid; transcription is regulated by Haa1p and induced in the presence of acetic acid; protein observed in plasma membrane foci in the presence of acetic acid; the authentic, non-tagged protein is detected in a phosphorylated state in highly purified mitochondria in high-throughput studies	0.183843	0.351378	0.824658			X		0	0	0.9328		X						0.9328
YSA1	YBR111C	Nudix hydrolase family member with ADP-ribose pyrophosphatase activity; shown to metabolize O-acetyl-ADP-ribose to AMP and acetylated ribose 5'-phosphate	10.6481	18.6306	4.92177	X				0.9845	0.0022	0				X				0.9845
YSC83	YHR017W	Non-essential mitochondrial protein of unknown function; mRNA induced during meiosis, peaking between mid to late prophase of meiosis I; similar to S. douglasii YSD83	0.323081	0.1474	0.157301			X		0	0	0.9685	X							0.9685
YTA12	YMR089C	Mitochondrial inner membrane m-AAA protease component; mediates degradation of misfolded or unassembled proteins; also required for correct assembly of mitochondrial enzyme complexes	0.298465	0.198188	0.52684			X		0	0	0.9709		X						0.9709
ZEO1	YOL109W	Peripheral membrane protein of the plasma membrane; interacts with Mid2p; regulates the cell integrity pathway mediated by Pkc1p and Slt2p; the authentic protein is detected in a phosphorylated state in highly purified mitochondria	4.92556	10.2748	7.00775	X				0.8908	0.0441	0	X			X				0.8908
ZIM17	YNL310C	Protein co-chaperone with a zinc finger motif; essential for protein import into mitochondria; may act with Pam18p to facilitate recognition and folding of imported proteins by Ssc1p (mtHSP70) in the mitochondrial matrix; required for the maintenance of Ssc1p solubility and assists in the functional interaction of Ssc1p with substrate proteins	8.50872	7.42178	0.503362	X				0.8497	0.0011	0				X				0.8497
ZTA1	YBR046C	NADPH-dependent quinone reductase; GFP-tagged protein localizes to the cytoplasm and nucleus; has similarity to E. coli quinone oxidoreductase and to human zeta-crystallin	4.35248	11.6544	1.56281	X				0.8431	0.1003	0				X				0.8431
