# Supplementary material for: A systematic bi-genomic split-GFP assay illuminates the mitochondrial matrix proteome and protein targeting routes
Source: eLife journal article supplement (doi:10.7554/elife.98889), 2024-07-26
Supplement: fig3-figsupp2-data1 [file Figure 3, figure supplement 2_Source data 1.pdf › Fig3supp2-sourcedata1/Figure 3, figure supplement 2_Source data 1.pdf]

IB : GFP<sub>B11</sub>

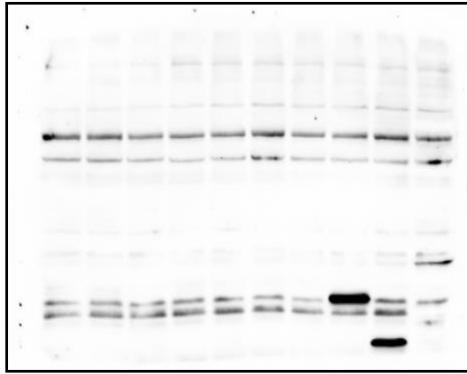

IB : ADH1

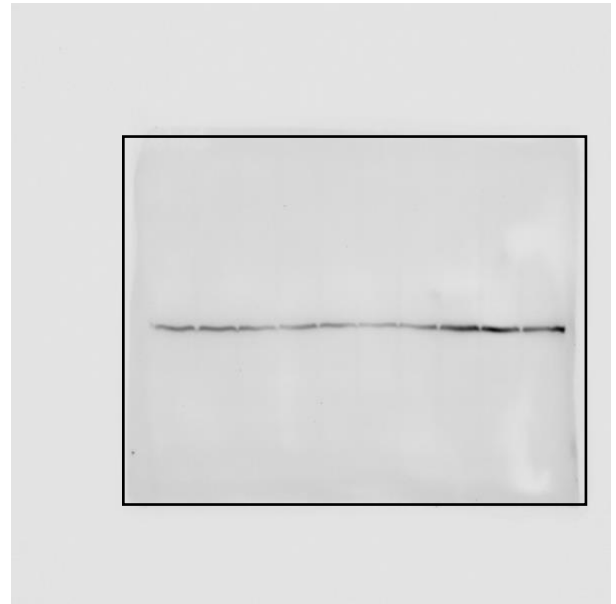

Merge: GFP<sub>B11</sub>

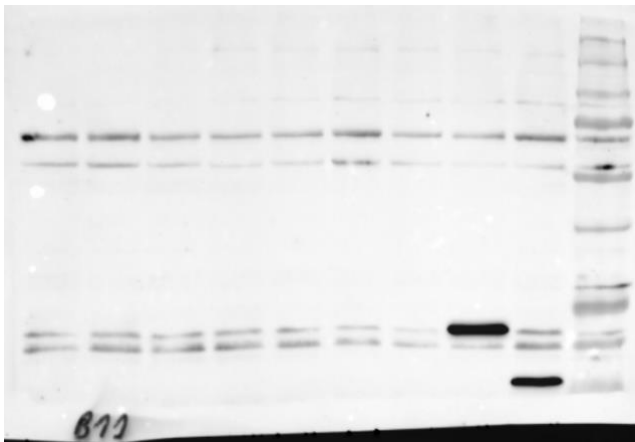

Merge : ADH1

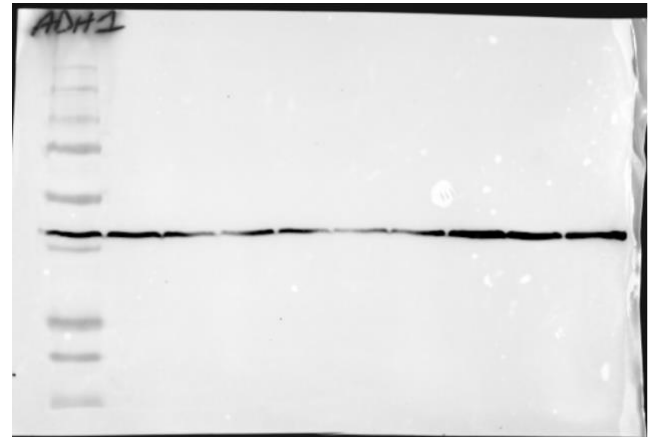

**Figure 3, figure supplement 2, Source Data 1.** Original membranes (ECL signal) and merge (ladder + ECL signal) corresponding to Figure 3, figure supplement 2, panel B. Precision Plus Protein™ All Blue from Biorad was used as molecular weight marker.
