# Supplementary material for: A systematic bi-genomic split-GFP assay illuminates the mitochondrial matrix proteome and protein targeting routes
Source: eLife journal article supplement (doi:10.7554/elife.98889), 2024-07-26
Supplement: fig4-data1 [file Figure 4_Source data 1.pdf › Fig4sourcedata1/Figure 4_Source data 1.pdf]

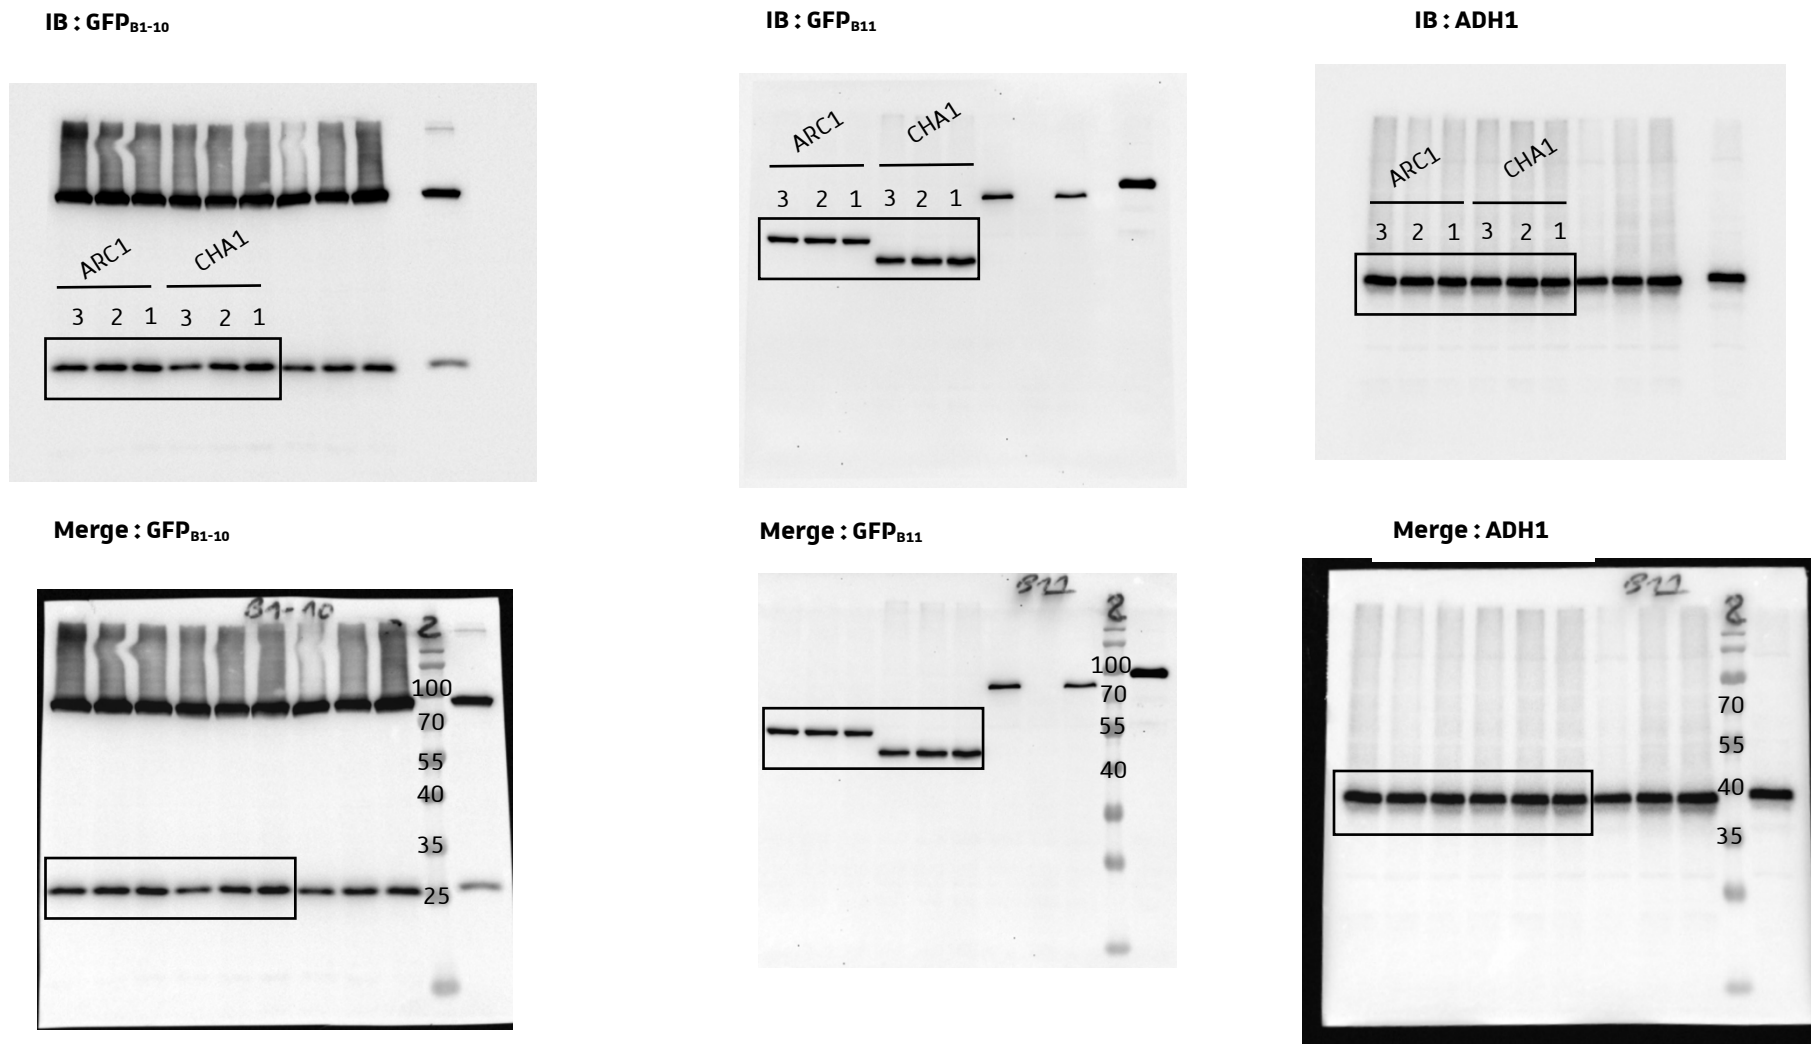

**Figure 4, Source Data 1.** Original membranes (ECL signal) and merge (ladder + ECL signal) corresponding to Figure 4, panel C. PageRuler™ Prestained Protein Ladder from Thermo Scientific™ was used as molecular weight marker.
