# Supplementary figures and images for: A systematic bi-genomic split-GFP assay illuminates the mitochondrial matrix proteome and protein targeting routes
Source: eLife journal article supplement (doi:10.7554/elife.98889), 2024-07-26

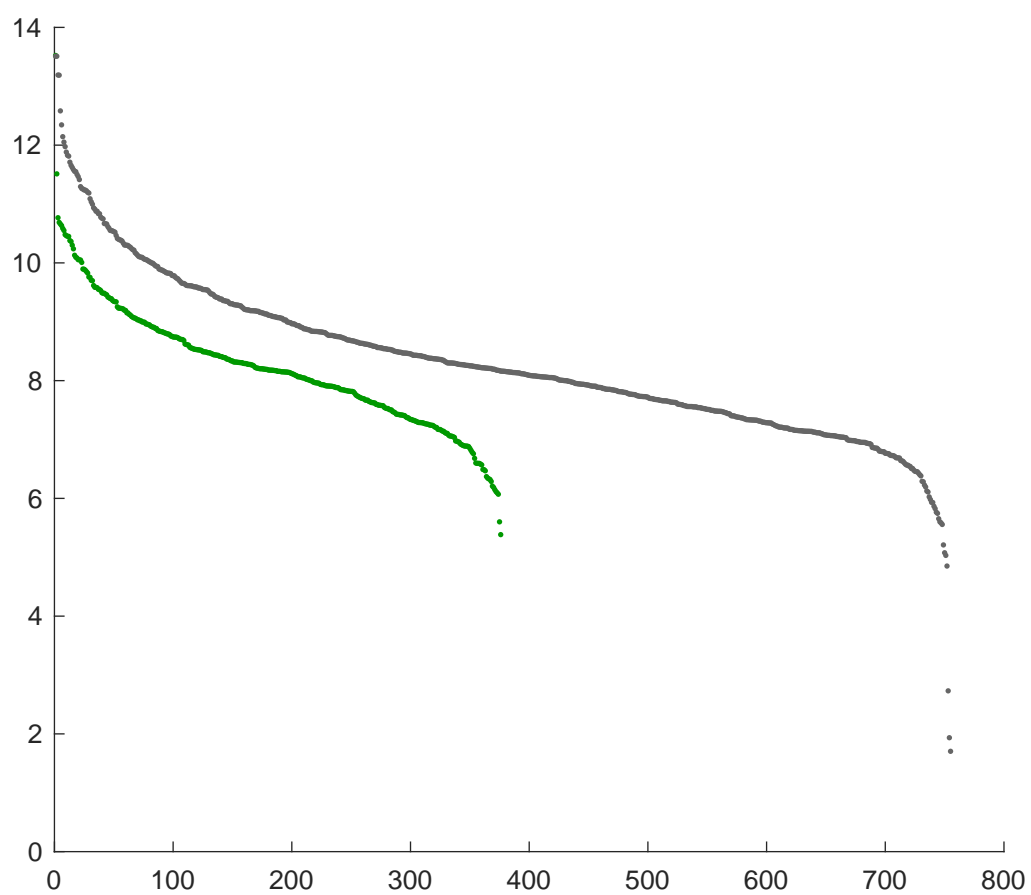

Supplement: fig2-data1 [file F1_Mito_HITS.pdf › SourceData-Fig3/F1_Mito_HITS.pdf]

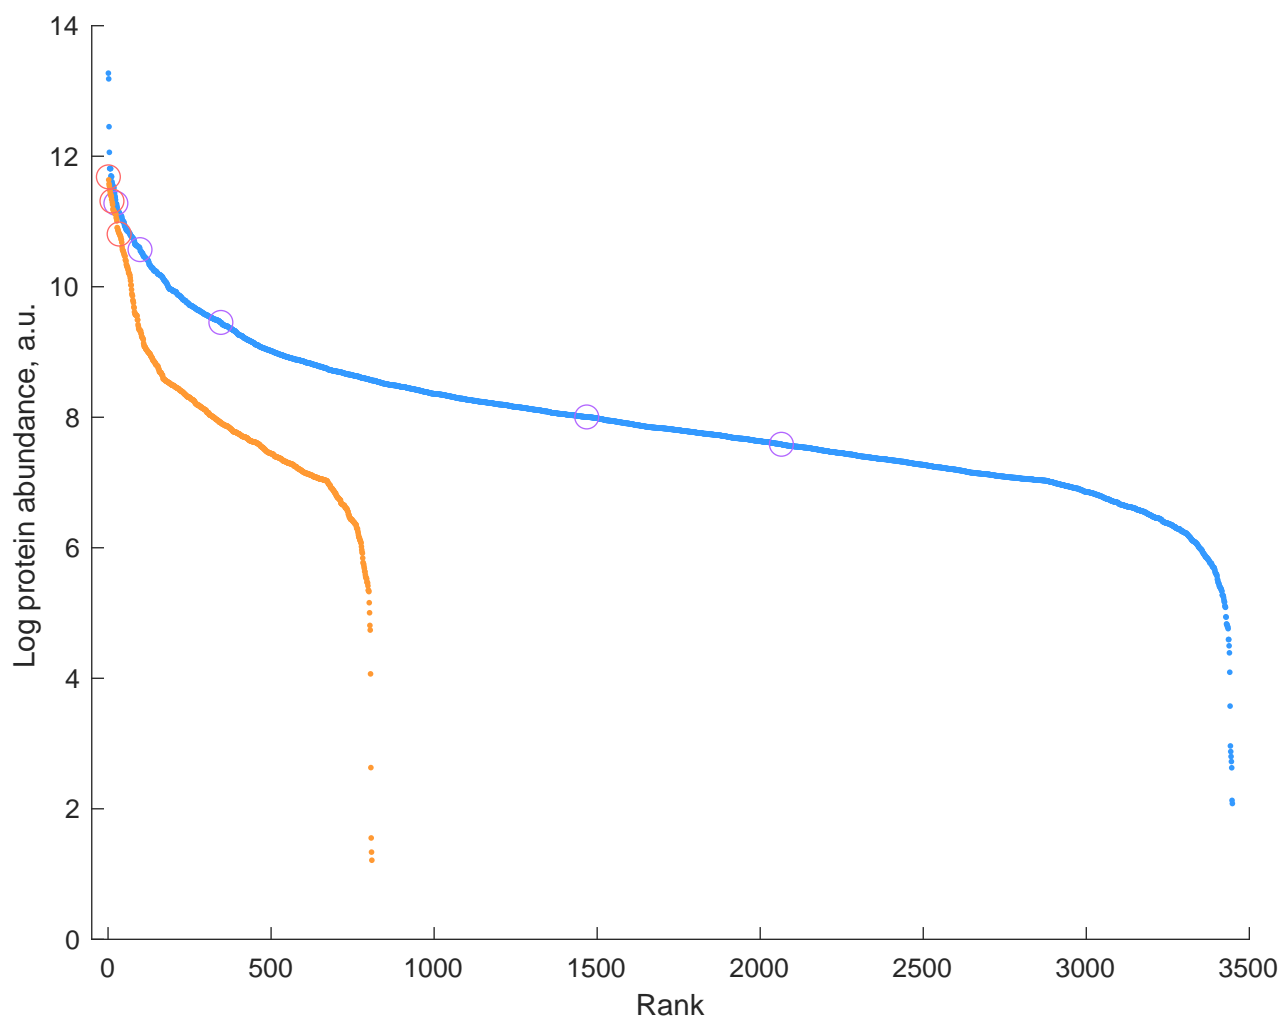

Supplement: fig2-data1 [file F1_nonMito_hits.pdf › SourceData-Fig3/F1_nonMito_hits.pdf]

# ARC1

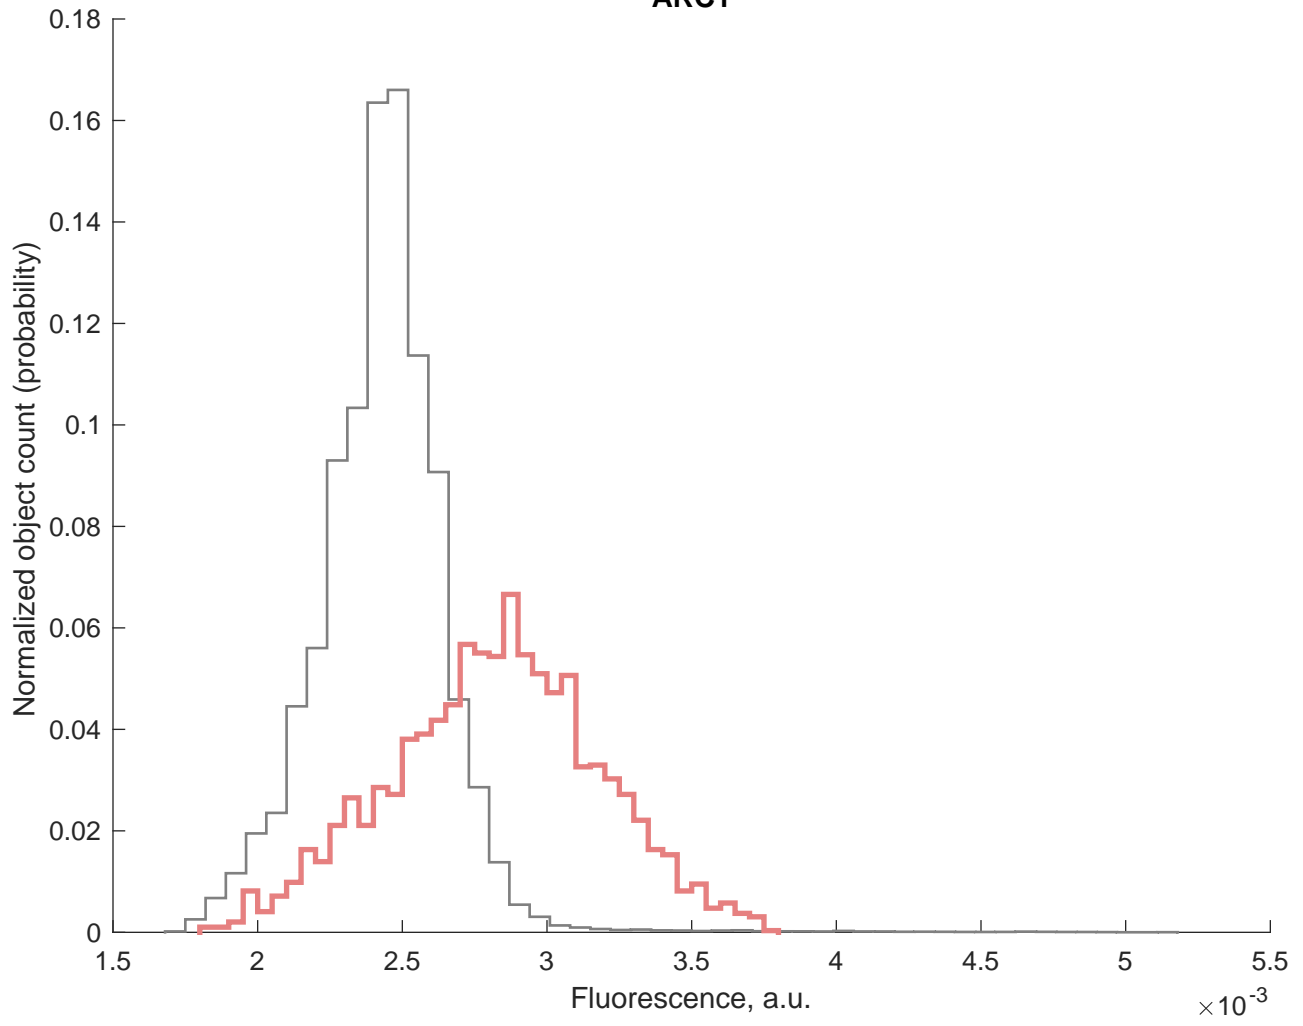

Supplement: fig2-data2 [file p005_w111_ARC1.pdf › SourceData-Fig2B_splitGFP/p005_w111_ARC1.pdf]

# ILV6

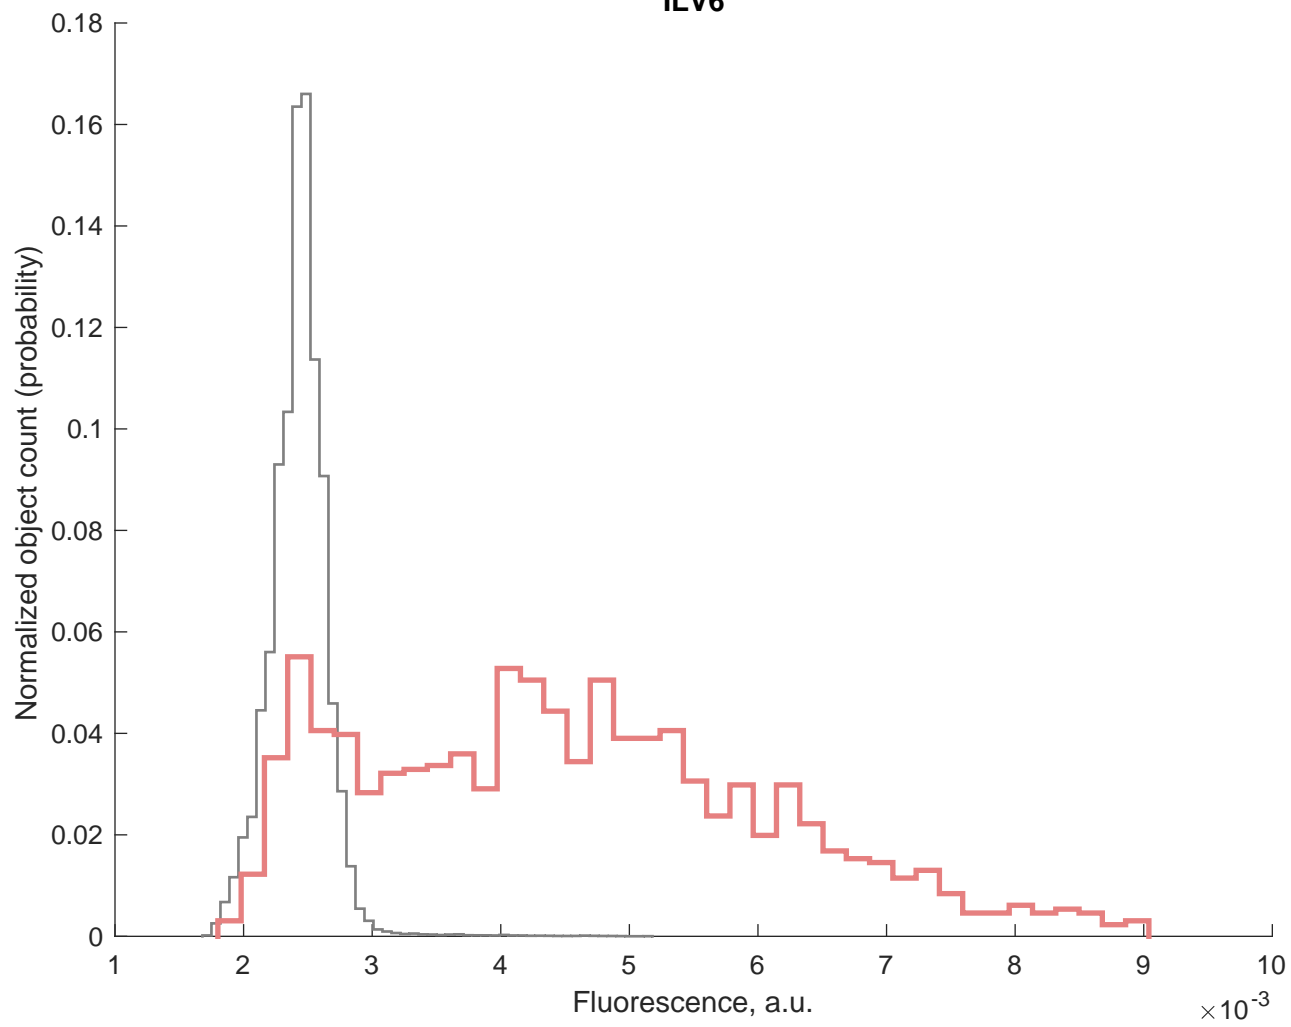

Supplement: fig2-data2 [file p005_w219_ILV6.pdf › SourceData-Fig2B_splitGFP/p005_w219_ILV6.pdf]

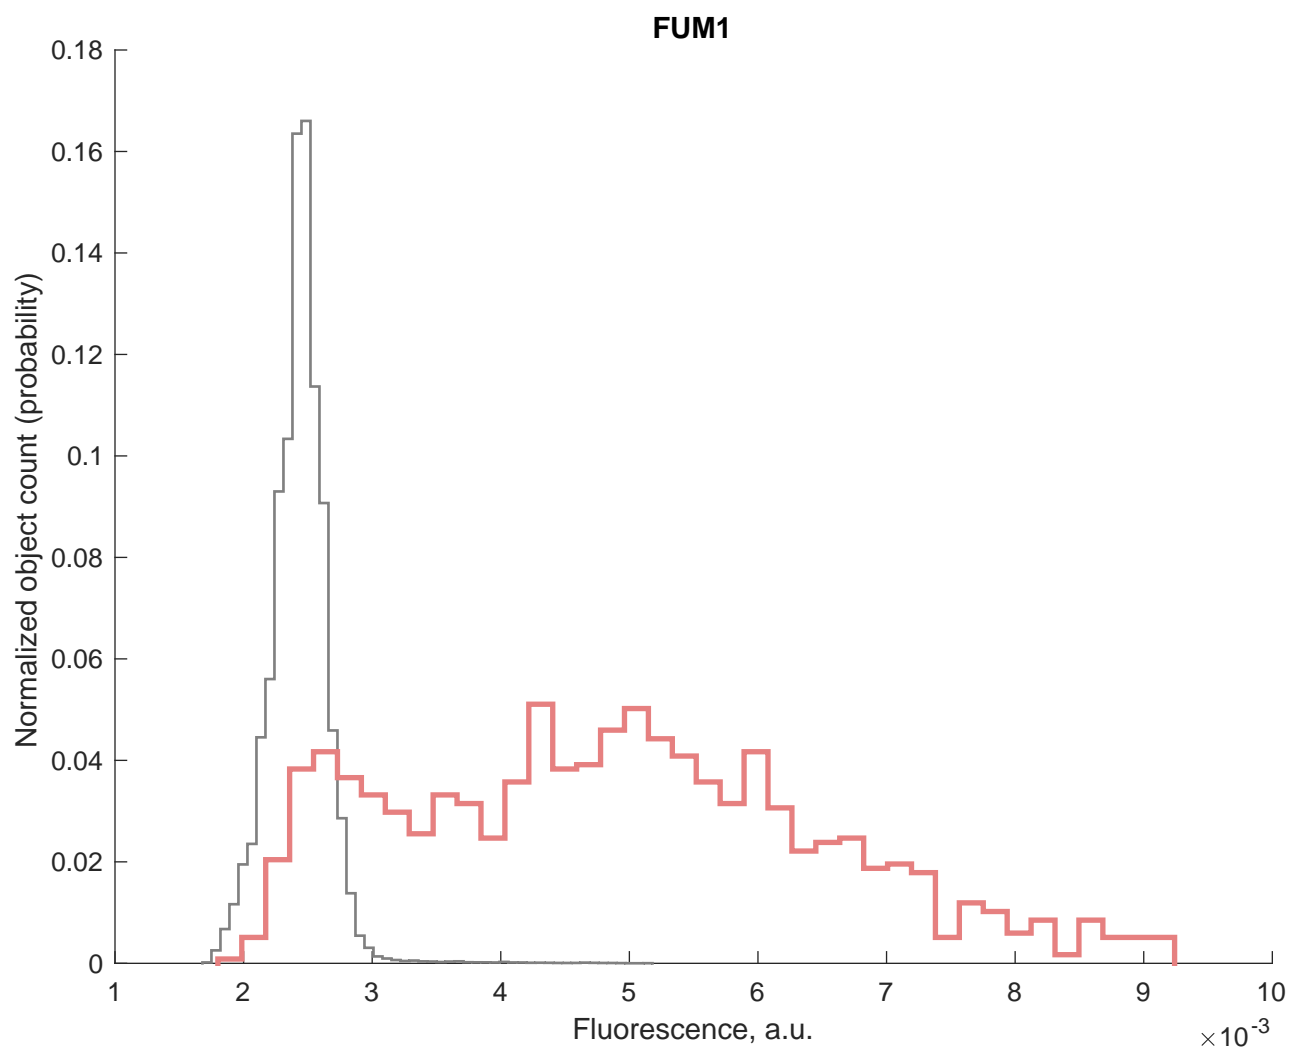

Supplement: fig2-data2 [file p005_w31_FUM1.pdf › SourceData-Fig2B_splitGFP/p005_w31_FUM1.pdf]
